# Supplementary material for: In silico characterization and prediction of global protein–mRNA interactions in yeast
Source: Oxford University Press journal article supplement (doi:10.1093/nar/gkr160), 2011-04-01
Supplement: 1371415_Supplementary_Data.zip [file 1371415_Supplementary_Data.zip]

Archive with 10 entries (10 files):
- Dataset_S12.xls
- Dataset_S13.txt
- Pancaldi_protrna_Supporting_material28feb.pdf
- Prediction_data.xls
- Supporting_Table_S1.csv
- Supporting_TableS2.xls
- Correlation_data.xls
- Dataset_S3.txt
- Dataset_S7.xls
- Dataset_S8.txt
