# Supplementary material for: In silico characterization and prediction of global protein–mRNA interactions in yeast
Source: Oxford University Press journal article supplement (doi:10.1093/nar/gkr160), 2011-04-01
Supplement: 1371415_Supplementary_Data.zip [file 1371415_Supplementary_Data.zip › Correlation_data.xls]

## Sheet: Dataset_S1
### p-values of all correlations
tfcode	chromosome	0.759119
tfcode	strand	0.0665985
tfcode	start	0.428948
tfcode	stop	0.434443
tfcode	protlength	0.354205
tfcode	pH	0.855148
tfcode	kDa	0.370036
tfcode	G	6.4e-05
tfcode	A	0.096558
tfcode	L	0.00233411
tfcode	M	0.264151
tfcode	F	0.000533763
tfcode	W	0.00121244
tfcode	K	0.797212
tfcode	Q	0.0257217
tfcode	E	0.907115
tfcode	S	7.21e-07
tfcode	P	1.76e-05
tfcode	V	1.2e-05
tfcode	I	0.00515467
tfcode	C	0.913792
tfcode	Y	0.00614274
tfcode	H	0.00637671
tfcode	R	0.0538292
tfcode	N	0.000142313
tfcode	D	0.118385
tfcode	T	7.92e-05
tfcode	ncont	8.17e-05
tfcode	scont	0.723781
tfcode	Number.of.introns	0.642369
tfcode	First.intron.length	0.608069
tfcode	First.intron.GC	0.609837
tfcode	mRNA.half.life.short	0.388999
tfcode	Ribosome.occupancy	1.26e-07
tfcode	Ribosome.density..rb.kb.	0.000813862
tfcode	ORF.length..nt.	0.894225
tfcode	mRNA.level	0.0212688
tfcode	GO.0006259_DNA_METABOLISM	0.861531
tfcode	GO.0006350_TRANSCRIPTION	3.04e-37
tfcode	GO.0006412_PROTEIN_BIOSYNTHESIS	0.135562
tfcode	GO.0006810_TRANSPORT	0.593494
tfcode	GO.0007049_CELL_CYCLE	0.845354
tfcode	GO.0007165_SIGNAL_TRANSDUCTION	0.509786
tfcode	GO.0008150_BIOLOGICAL_PROCESS	0.267279
tfcode	GO.0016070_RNA_METABOLISM	0.555431
tfcode	nuc	3.42e-10
tfcode	vac	0.204664
tfcode	cyto	0.47072
tfcode	mito	0.0911241
tfcode	er	0.018775
tfcode	MOLECULAR.WEIGHT..in.Daltons.	0.370036
tfcode	PI	0.855033
tfcode	CAI..Codon.Adaptation.Index.	0.000261689
tfcode	PROTEIN.LENGTH	0.354205
tfcode	CODON.BIAS	0.000566133
tfcode	ALA	0.868066
tfcode	ARG	0.0806634
tfcode	ASN	0.0102245
tfcode	ASP	0.156735
tfcode	CYS	0.685047
tfcode	GLN	0.0573572
tfcode	GLU	0.550878
tfcode	GLY	0.18071
tfcode	HIS	0.016716
tfcode	ILE	0.732866
tfcode	LEU	0.682638
tfcode	LYS	0.421442
tfcode	MET	0.784715
tfcode	PHE	0.162589
tfcode	PRO	0.00836975
tfcode	SER	0.0034316
tfcode	THR	0.0193006
tfcode	TRP	0.0195997
tfcode	TYR	0.527999
tfcode	VAL	0.196181
tfcode	FOP.SCORE..Frequency.of.Optimal.Codons.	0.000628227
tfcode	GRAVY.SCORE..Hydropathicity.of.Protein.	4.41e-08
tfcode	AROMATICITY.SCORE..Frequency.of.aromatic.amino.acids..Phe..Tyr..Trp.	1.69e-05
tfcode	lu3.x	0.0549848
tfcode	u3A	0.0941377
tfcode	u3C	0.153594
tfcode	u3T	0.87872
tfcode	u3G	0.848529
tfcode	u3AC	0.640276
tfcode	u3AT	0.227556
tfcode	u3AG	0.909319
tfcode	u3CT	0.294744
tfcode	u3CG	0.407173
tfcode	u3TG	0.2885
tfcode	X3AUel	0.0556943
tfcode	lu5.x	0.0183198
tfcode	u5A	0.0715262
tfcode	u5C	0.607396
tfcode	u5T	0.0563134
tfcode	u5G	0.826308
tfcode	u5AC	0.726879
tfcode	u5AT	0.574757
tfcode	u5AG	0.247993
tfcode	u5CT	0.353261
tfcode	u5CG	0.653064
tfcode	u5TG	0.180296
tfcode	X5AUel	0.0163072
tfcode	lcds	0.408286
tfcode	cdsA	0.00024042
tfcode	cdsC	0.000105764
tfcode	cdsT	0.000382021
tfcode	cdsG	0.0540853
tfcode	cdsAC	4.98e-06
tfcode	cdsAT	0.501987
tfcode	cdsAG	0.620177
tfcode	cdsCT	0.614087
tfcode	cdsCG	0.0276095
tfcode	cdsTG	0.00207981
tfcode	cdsAUel	0.369879
tfcode	lorf.x	0.0844743
tfcode	nostems	0.106685
tfcode	relstems	0.932248
tfcode	length	0.0706917
tfcode	lu3.y	0.0813716
tfcode	lu5.y	0.0211549
tfcode	lorf.y	0.351167
tfcode	relnostems	0.433496
tfcode	X3stems	0.426048
tfcode	X5stems	0.0399374
tfcode	orfstems	0.325752
tfcode	c3	0.318975
tfcode	c5	0.0713988
tfcode	co	0.274106
tfcode	orflength	0.0700087
tfcode	score	0.348824
tfcode	energy	0.138239
tfcode	CDS_AVG	0.819584
tfcode	CDS_SDV	0.0124062
tfcode	CDS_RELSTDEV	0.51137
tfcode	CDS_LN	0.354205
tfcode	CDS_MIN	0.0598035
tfcode	CDS_Q25	0.0137844
tfcode	CDS_MEDIAN	0.168866
tfcode	CDS_Q75	0.058577
tfcode	CDS_MAX	0.0109271
tfcode	CDS_FIRST10_AVG	0.922813
tfcode	CDS_FIRST10_SDV	0.351921
tfcode	CDS_FIRST10_RELSDV	0.723777
tfcode	CDS_LAST10_AVG	0.767546
tfcode	CDS_LAST10_SDV	0.919767
tfcode	CDS_LAST10_RELSDV	0.490707
tfcode	X5UTR_AVG	0.0472697
tfcode	X5UTR_SDV	0.0898351
tfcode	X5UTR_RELSTDEV	0.296591
tfcode	X5UTR_LN	0.0209839
tfcode	X5UTR_MIN	0.799384
tfcode	X5UTR_Q25	0.331871
tfcode	X5UTR_MEDIAN	0.288129
tfcode	X5UTR_Q75	0.183936
tfcode	X5UTR_MAX	0.706892
tfcode	X5UTR_FIRST10_AVG	0.201548
tfcode	X5UTR_FIRST10_SDV	0.559096
tfcode	X5UTR_FIRST10_RELSDV	0.927417
tfcode	X5UTR_LAST10_AVG	0.0202431
tfcode	X5UTR_LAST10_SDV	0.143562
tfcode	X5UTR_LAST10_RELSDV	0.0845468
tfcode	X3UTR_AVG	0.649317
tfcode	X3UTR_SDV	0.215035
tfcode	X3UTR_RELSTDEV	0.199047
tfcode	X3UTR_LN	0.079593
tfcode	X3UTR_MIN	0.391016
tfcode	X3UTR_Q23	0.783884
tfcode	X3UTR_MEDIAN	0.733026
tfcode	X3UTR_Q73	0.471236
tfcode	X3UTR_MAX	0.955963
tfcode	X3UTR_FIRST10_AVG	0.24581
tfcode	X3UTR_FIRST10_SDV	0.0907539
tfcode	X3UTR_FIRST10_RELSDV	0.219307
tfcode	X3UTR_LAST10_SDV	0.804724
tfcode	X3UTR_LAST10_RELSDV	0.804724
chromosome	strand	0.124543
chromosome	start	0.000344779
chromosome	stop	0.000328776
chromosome	protlength	0.164895
chromosome	pH	0.00364643
chromosome	kDa	0.152701
chromosome	G	0.447272
chromosome	A	0.0469069
chromosome	L	0.966049
chromosome	M	0.331234
chromosome	F	0.233805
chromosome	W	0.796877
chromosome	K	0.280859
chromosome	Q	0.732476
chromosome	E	0.109017
chromosome	S	0.340956
chromosome	P	0.00872373
chromosome	V	0.744278
chromosome	I	0.352539
chromosome	C	0.462012
chromosome	Y	0.519223
chromosome	H	0.0715853
chromosome	R	0.569653
chromosome	N	0.0674235
chromosome	D	0.0306963
chromosome	T	0.380437
chromosome	ncont	0.16489
chromosome	scont	0.114638
chromosome	Number.of.introns	0.255043
chromosome	First.intron.length	0.265504
chromosome	First.intron.GC	0.237531
chromosome	mRNA.half.life.short	1.52e-09
chromosome	Ribosome.occupancy	0.0386756
chromosome	Ribosome.density..rb.kb.	3.94e-05
chromosome	ORF.length..nt.	0.0110043
chromosome	mRNA.level	0.534418
chromosome	GO.0006259_DNA_METABOLISM	0.712
chromosome	GO.0006350_TRANSCRIPTION	0.131496
chromosome	GO.0006412_PROTEIN_BIOSYNTHESIS	0.900468
chromosome	GO.0006810_TRANSPORT	0.181132
chromosome	GO.0007049_CELL_CYCLE	0.209934
chromosome	GO.0007165_SIGNAL_TRANSDUCTION	0.0941989
chromosome	GO.0008150_BIOLOGICAL_PROCESS	0.773244
chromosome	GO.0016070_RNA_METABOLISM	0.0693738
chromosome	nuc	0.669018
chromosome	vac	0.432079
chromosome	cyto	0.940472
chromosome	mito	0.122411
chromosome	er	0.000138495
chromosome	MOLECULAR.WEIGHT..in.Daltons.	0.152931
chromosome	PI	0.00362475
chromosome	CAI..Codon.Adaptation.Index.	0.827585
chromosome	PROTEIN.LENGTH	0.165174
chromosome	CODON.BIAS	0.41368
chromosome	ALA	0.955653
chromosome	ARG	0.243057
chromosome	ASN	0.0590257
chromosome	ASP	0.656731
chromosome	CYS	0.819434
chromosome	GLN	0.28017
chromosome	GLU	0.518907
chromosome	GLY	0.707026
chromosome	HIS	0.773144
chromosome	ILE	0.34715
chromosome	LEU	0.188433
chromosome	LYS	0.0516658
chromosome	MET	0.683793
chromosome	PHE	0.132907
chromosome	PRO	0.04563
chromosome	SER	0.0838865
chromosome	THR	0.101689
chromosome	TRP	0.326383
chromosome	TYR	0.10437
chromosome	VAL	0.279663
chromosome	FOP.SCORE..Frequency.of.Optimal.Codons.	0.365648
chromosome	GRAVY.SCORE..Hydropathicity.of.Protein.	0.545799
chromosome	AROMATICITY.SCORE..Frequency.of.aromatic.amino.acids..Phe..Tyr..Trp.	0.213811
chromosome	lu3.x	0.848418
chromosome	u3A	0.727362
chromosome	u3C	0.458379
chromosome	u3T	0.461717
chromosome	u3G	0.787108
chromosome	u3AC	0.111754
chromosome	u3AT	0.46194
chromosome	u3AG	0.0910586
chromosome	u3CT	0.233422
chromosome	u3CG	0.980433
chromosome	u3TG	0.183601
chromosome	X3AUel	0.786509
chromosome	lu5.x	0.749801
chromosome	u5A	0.645492
chromosome	u5C	0.558196
chromosome	u5T	0.469102
chromosome	u5G	0.471324
chromosome	u5AC	0.777142
chromosome	u5AT	0.0691048
chromosome	u5AG	0.613863
chromosome	u5CT	0.323099
chromosome	u5CG	0.356951
chromosome	u5TG	0.396502
chromosome	X5AUel	0.770417
chromosome	lcds	0.207213
chromosome	cdsA	0.0442193
chromosome	cdsC	0.464968
chromosome	cdsT	0.29692
chromosome	cdsG	0.00798038
chromosome	cdsAC	0.893203
chromosome	cdsAT	0.404642
chromosome	cdsAG	0.904429
chromosome	cdsCT	0.845326
chromosome	cdsCG	0.038301
chromosome	cdsTG	0.0390838
chromosome	cdsAUel	0.166181
chromosome	lorf.x	0.200259
chromosome	nostems	0.223617
chromosome	relstems	0.0884459
chromosome	length	0.182911
chromosome	lu3.y	0.9254
chromosome	lu5.y	0.71124
chromosome	lorf.y	0.190524
chromosome	relnostems	0.347606
chromosome	X3stems	0.45531
chromosome	X5stems	0.286314
chromosome	orfstems	0.788981
chromosome	c3	0.903558
chromosome	c5	0.843408
chromosome	co	0.203687
chromosome	orflength	0.187478
chromosome	score	0.139355
chromosome	energy	0.397645
chromosome	CDS_AVG	0.519921
chromosome	CDS_SDV	0.16887
chromosome	CDS_RELSTDEV	0.707997
chromosome	CDS_LN	0.164895
chromosome	CDS_MIN	0.138168
chromosome	CDS_Q25	0.634403
chromosome	CDS_MEDIAN	0.499666
chromosome	CDS_Q75	0.334127
chromosome	CDS_MAX	0.461434
chromosome	CDS_FIRST10_AVG	0.53966
chromosome	CDS_FIRST10_SDV	0.0629649
chromosome	CDS_FIRST10_RELSDV	0.0875768
chromosome	CDS_LAST10_AVG	0.637039
chromosome	CDS_LAST10_SDV	0.395529
chromosome	CDS_LAST10_RELSDV	0.680883
chromosome	X5UTR_AVG	0.0837532
chromosome	X5UTR_SDV	0.955619
chromosome	X5UTR_RELSTDEV	0.43986
chromosome	X5UTR_LN	0.723731
chromosome	X5UTR_MIN	0.161581
chromosome	X5UTR_Q25	0.274782
chromosome	X5UTR_MEDIAN	0.323051
chromosome	X5UTR_Q75	0.380987
chromosome	X5UTR_MAX	0.879289
chromosome	X5UTR_FIRST10_AVG	0.858451
chromosome	X5UTR_FIRST10_SDV	0.609655
chromosome	X5UTR_FIRST10_RELSDV	0.0270405
chromosome	X5UTR_LAST10_AVG	0.68228
chromosome	X5UTR_LAST10_SDV	0.809713
chromosome	X5UTR_LAST10_RELSDV	0.476865
chromosome	X3UTR_AVG	0.749143
chromosome	X3UTR_SDV	0.135499
chromosome	X3UTR_RELSTDEV	0.158431
chromosome	X3UTR_LN	0.868282
chromosome	X3UTR_MIN	0.809586
chromosome	X3UTR_Q23	0.350495
chromosome	X3UTR_MEDIAN	0.501497
chromosome	X3UTR_Q73	0.965497
chromosome	X3UTR_MAX	0.0593607
chromosome	X3UTR_FIRST10_AVG	0.400312
chromosome	X3UTR_FIRST10_SDV	0.293978
chromosome	X3UTR_FIRST10_RELSDV	0.648842
chromosome	X3UTR_LAST10_SDV	0.282274
chromosome	X3UTR_LAST10_RELSDV	0.282274
strand	start	0.713521
strand	stop	0.555562
strand	protlength	0.98986
strand	pH	0.272276
strand	kDa	0.993968
strand	G	0.289726
strand	A	0.724544
strand	L	0.577667
strand	M	0.271317
strand	F	0.454694
strand	W	0.810337
strand	K	0.475796
strand	Q	0.796274
strand	E	0.836997
strand	S	0.727876
strand	P	0.207187
strand	V	0.58897
strand	I	0.518954
strand	C	0.632149
strand	Y	0.714562
strand	H	0.13937
strand	R	0.734019
strand	N	0.412491
strand	D	0.0929686
strand	T	0.939074
strand	ncont	0.606298
strand	scont	0.928786
strand	Number.of.introns	0.572258
strand	First.intron.length	0.55679
strand	First.intron.GC	0.603172
strand	mRNA.half.life.short	0.3288
strand	Ribosome.occupancy	0.661227
strand	Ribosome.density..rb.kb.	0.459672
strand	ORF.length..nt.	0.569602
strand	mRNA.level	0.813386
strand	GO.0006259_DNA_METABOLISM	0.308783
strand	GO.0006350_TRANSCRIPTION	0.065138
strand	GO.0006412_PROTEIN_BIOSYNTHESIS	0.504659
strand	GO.0006810_TRANSPORT	0.834675
strand	GO.0007049_CELL_CYCLE	0.173206
strand	GO.0007165_SIGNAL_TRANSDUCTION	0.635185
strand	GO.0008150_BIOLOGICAL_PROCESS	0.958616
strand	GO.0016070_RNA_METABOLISM	0.266647
strand	nuc	0.370031
strand	vac	0.460062
strand	cyto	0.376607
strand	mito	0.766528
strand	er	0.986363
strand	MOLECULAR.WEIGHT..in.Daltons.	0.994414
strand	PI	0.272843
strand	CAI..Codon.Adaptation.Index.	0.271165
strand	PROTEIN.LENGTH	0.989354
strand	CODON.BIAS	0.315946
strand	ALA	0.763537
strand	ARG	0.751026
strand	ASN	0.687394
strand	ASP	0.588966
strand	CYS	0.380276
strand	GLN	0.754029
strand	GLU	0.953664
strand	GLY	0.750003
strand	HIS	0.419257
strand	ILE	0.908129
strand	LEU	0.682586
strand	LYS	0.655286
strand	MET	0.628315
strand	PHE	0.582221
strand	PRO	0.594437
strand	SER	0.917432
strand	THR	0.876528
strand	TRP	0.804849
strand	TYR	0.841307
strand	VAL	0.864382
strand	FOP.SCORE..Frequency.of.Optimal.Codons.	0.303519
strand	GRAVY.SCORE..Hydropathicity.of.Protein.	0.718617
strand	AROMATICITY.SCORE..Frequency.of.aromatic.amino.acids..Phe..Tyr..Trp.	0.982453
strand	lu3.x	1.97e-13
strand	u3A	0.522872
strand	u3C	0.486533
strand	u3T	0.15456
strand	u3G	0.0267923
strand	u3AC	0.0219715
strand	u3AT	0.433471
strand	u3AG	0.0109378
strand	u3CT	0.181973
strand	u3CG	0.990002
strand	u3TG	0.21132
strand	X3AUel	2.93e-13
strand	lu5.x	0.106394
strand	u5A	0.111223
strand	u5C	0.37851
strand	u5T	0.110992
strand	u5G	0.0813081
strand	u5AC	0.892668
strand	u5AT	0.290804
strand	u5AG	0.0685952
strand	u5CT	0.281003
strand	u5CG	0.72957
strand	u5TG	0.841522
strand	X5AUel	0.109043
strand	lcds	0.838166
strand	cdsA	0.711233
strand	cdsC	0.1266
strand	cdsT	0.937197
strand	cdsG	0.195902
strand	cdsAC	0.933989
strand	cdsAT	0.475325
strand	cdsAG	0.275507
strand	cdsCT	0.392038
strand	cdsCG	0.870047
strand	cdsTG	0.881804
strand	cdsAUel	0.995082
strand	lorf.x	0.290374
strand	nostems	0.520717
strand	relstems	0.29646
strand	length	0.363988
strand	lu3.y	4.67e-13
strand	lu5.y	0.128384
strand	lorf.y	0.949977
strand	relnostems	0.108478
strand	X3stems	3.49e-06
strand	X5stems	0.237899
strand	orfstems	0.977883
strand	c3	3.03e-11
strand	c5	0.039716
strand	co	0.936952
strand	orflength	0.361807
strand	score	0.989536
strand	energy	0.596426
strand	CDS_AVG	0.125188
strand	CDS_SDV	0.27786
strand	CDS_RELSTDEV	0.957979
strand	CDS_LN	0.98986
strand	CDS_MIN	0.707021
strand	CDS_Q25	0.136749
strand	CDS_MEDIAN	0.0298835
strand	CDS_Q75	0.188404
strand	CDS_MAX	0.333243
strand	CDS_FIRST10_AVG	0.739833
strand	CDS_FIRST10_SDV	0.478496
strand	CDS_FIRST10_RELSDV	0.206878
strand	CDS_LAST10_AVG	0.164503
strand	CDS_LAST10_SDV	0.639389
strand	CDS_LAST10_RELSDV	0.444489
strand	X5UTR_AVG	0.858898
strand	X5UTR_SDV	0.420865
strand	X5UTR_RELSTDEV	0.139882
strand	X5UTR_LN	0.130857
strand	X5UTR_MIN	0.262572
strand	X5UTR_Q25	0.854988
strand	X5UTR_MEDIAN	0.807795
strand	X5UTR_Q75	0.745492
strand	X5UTR_MAX	0.238925
strand	X5UTR_FIRST10_AVG	0.765457
strand	X5UTR_FIRST10_SDV	0.553198
strand	X5UTR_FIRST10_RELSDV	0.0297045
strand	X5UTR_LAST10_AVG	0.908102
strand	X5UTR_LAST10_SDV	0.723417
strand	X5UTR_LAST10_RELSDV	0.724582
strand	X3UTR_AVG	0.308802
strand	X3UTR_SDV	0.819457
strand	X3UTR_RELSTDEV	0.420002
strand	X3UTR_LN	2.3e-13
strand	X3UTR_MIN	0.0136833
strand	X3UTR_Q23	0.0722547
strand	X3UTR_MEDIAN	0.100544
strand	X3UTR_Q73	0.807202
strand	X3UTR_MAX	0.0475557
strand	X3UTR_FIRST10_AVG	0.674212
strand	X3UTR_FIRST10_SDV	0.492963
strand	X3UTR_FIRST10_RELSDV	0.595303
strand	X3UTR_LAST10_SDV	0.162184
strand	X3UTR_LAST10_RELSDV	0.162184
start	protlength	0.402771
start	pH	0.615818
start	kDa	0.426401
start	G	0.164906
start	A	0.0492204
start	L	0.424655
start	M	0.711223
start	F	0.833236
start	W	0.37922
start	K	0.060097
start	Q	0.395084
start	E	0.117047
start	S	0.798909
start	P	0.81267
start	V	0.537755
start	I	0.0176066
start	C	0.363873
start	Y	0.658841
start	H	0.969423
start	R	0.590322
start	N	0.319436
start	D	0.811535
start	T	0.754354
start	ncont	0.818067
start	scont	0.374106
start	Number.of.introns	0.0136966
start	First.intron.length	0.0302395
start	First.intron.GC	0.0112182
start	mRNA.half.life.short	0.758599
start	Ribosome.occupancy	0.542643
start	Ribosome.density..rb.kb.	0.640985
start	ORF.length..nt.	0.735325
start	mRNA.level	0.483553
start	GO.0006259_DNA_METABOLISM	0.74285
start	GO.0006350_TRANSCRIPTION	0.743345
start	GO.0006412_PROTEIN_BIOSYNTHESIS	0.719326
start	GO.0006810_TRANSPORT	0.0934481
start	GO.0007049_CELL_CYCLE	0.249595
start	GO.0007165_SIGNAL_TRANSDUCTION	0.653201
start	GO.0008150_BIOLOGICAL_PROCESS	0.17606
start	GO.0016070_RNA_METABOLISM	0.676455
start	nuc	0.432863
start	vac	0.284742
start	cyto	0.439785
start	mito	0.294045
start	er	0.0263513
start	MOLECULAR.WEIGHT..in.Daltons.	0.426402
start	PI	0.615711
start	CAI..Codon.Adaptation.Index.	0.845006
start	PROTEIN.LENGTH	0.402768
start	CODON.BIAS	0.305231
start	ALA	0.102534
start	ARG	0.137643
start	ASN	0.264672
start	ASP	0.392802
start	CYS	0.183623
start	GLN	0.23317
start	GLU	0.945747
start	GLY	0.107146
start	HIS	0.275942
start	ILE	0.909203
start	LEU	0.54098
start	LYS	0.910825
start	MET	0.257478
start	PHE	0.61567
start	PRO	0.434553
start	SER	0.623564
start	THR	0.534652
start	TRP	0.83509
start	TYR	0.370764
start	VAL	0.246806
start	FOP.SCORE..Frequency.of.Optimal.Codons.	0.391317
start	GRAVY.SCORE..Hydropathicity.of.Protein.	0.932342
start	AROMATICITY.SCORE..Frequency.of.aromatic.amino.acids..Phe..Tyr..Trp.	0.999289
start	lu3.x	0.967576
start	u3A	0.605991
start	u3C	0.485197
start	u3T	0.0374934
start	u3G	0.0163446
start	u3AC	0.730253
start	u3AT	0.33491
start	u3AG	0.149624
start	u3CT	0.955919
start	u3CG	0.524154
start	u3TG	0.0859873
start	X3AUel	0.989166
start	lu5.x	0.146566
start	u5A	0.183071
start	u5C	0.85211
start	u5T	0.0425043
start	u5G	0.94025
start	u5AC	0.466736
start	u5AT	0.169597
start	u5AG	0.656923
start	u5CT	0.254438
start	u5CG	0.917197
start	u5TG	0.366841
start	X5AUel	0.172432
start	lcds	0.406959
start	cdsA	0.000570042
start	cdsC	0.00276121
start	cdsT	0.306939
start	cdsG	0.00414542
start	cdsAC	0.358769
start	cdsAT	0.0589698
start	cdsAG	0.0893479
start	cdsCT	0.064819
start	cdsCG	9.14e-05
start	cdsTG	0.0440796
start	cdsAUel	0.391046
start	lorf.x	0.369555
start	nostems	0.26352
start	relstems	0.208475
start	length	0.351108
start	lu3.y	0.841072
start	lu5.y	0.173101
start	lorf.y	0.425045
start	relnostems	0.0951525
start	X3stems	0.792255
start	X5stems	0.765434
start	orfstems	0.110279
start	c3	0.900459
start	c5	0.27204
start	co	0.298063
start	orflength	0.376364
start	score	0.267006
start	energy	0.121992
start	CDS_AVG	0.118186
start	CDS_SDV	0.174885
start	CDS_RELSTDEV	0.126712
start	CDS_LN	0.402771
start	CDS_MIN	0.0245775
start	CDS_Q25	0.401177
start	CDS_MEDIAN	0.804859
start	CDS_Q75	0.284161
start	CDS_MAX	0.437551
start	CDS_FIRST10_AVG	0.864419
start	CDS_FIRST10_SDV	0.954255
start	CDS_FIRST10_RELSDV	0.855903
start	CDS_LAST10_AVG	0.677732
start	CDS_LAST10_SDV	0.0787562
start	CDS_LAST10_RELSDV	0.883052
start	X5UTR_AVG	0.693198
start	X5UTR_SDV	0.882721
start	X5UTR_RELSTDEV	0.115458
start	X5UTR_LN	0.16546
start	X5UTR_MIN	0.413915
start	X5UTR_Q25	0.889446
start	X5UTR_MEDIAN	0.717374
start	X5UTR_Q75	0.866541
start	X5UTR_MAX	0.95411
start	X5UTR_FIRST10_AVG	0.73681
start	X5UTR_FIRST10_SDV	0.390222
start	X5UTR_FIRST10_RELSDV	0.470368
start	X5UTR_LAST10_AVG	0.576524
start	X5UTR_LAST10_SDV	0.449979
start	X5UTR_LAST10_RELSDV	0.851403
start	X3UTR_AVG	0.795219
start	X3UTR_SDV	0.409314
start	X3UTR_RELSTDEV	0.30739
start	X3UTR_LN	0.810124
start	X3UTR_MIN	0.323006
start	X3UTR_Q23	0.167625
start	X3UTR_MEDIAN	0.231884
start	X3UTR_Q73	0.404189
start	X3UTR_MAX	0.954506
start	X3UTR_FIRST10_AVG	0.929256
start	X3UTR_FIRST10_SDV	0.631621
start	X3UTR_FIRST10_RELSDV	0.439589
start	X3UTR_LAST10_SDV	0.654742
start	X3UTR_LAST10_RELSDV	0.654742
stop	protlength	0.398374
stop	pH	0.614728
stop	kDa	0.421835
stop	G	0.164076
stop	A	0.0500497
stop	L	0.429442
stop	M	0.71083
stop	F	0.831739
stop	W	0.38051
stop	K	0.0586763
stop	Q	0.397076
stop	E	0.115672
stop	S	0.804455
stop	P	0.813186
stop	V	0.54065
stop	I	0.0177777
stop	C	0.361572
stop	Y	0.656576
stop	H	0.975552
stop	R	0.592677
stop	N	0.319499
stop	D	0.809327
stop	T	0.754576
stop	ncont	0.820027
stop	scont	0.372625
stop	Number.of.introns	0.0138754
stop	First.intron.length	0.03062
stop	First.intron.GC	0.0113535
stop	mRNA.half.life.short	0.759149
stop	Ribosome.occupancy	0.543049
stop	Ribosome.density..rb.kb.	0.631945
stop	ORF.length..nt.	0.738812
stop	mRNA.level	0.483429
stop	GO.0006259_DNA_METABOLISM	0.746806
stop	GO.0006350_TRANSCRIPTION	0.737851
stop	GO.0006412_PROTEIN_BIOSYNTHESIS	0.709938
stop	GO.0006810_TRANSPORT	0.0927951
stop	GO.0007049_CELL_CYCLE	0.252009
stop	GO.0007165_SIGNAL_TRANSDUCTION	0.650658
stop	GO.0008150_BIOLOGICAL_PROCESS	0.177073
stop	GO.0016070_RNA_METABOLISM	0.66936
stop	nuc	0.439624
stop	vac	0.287875
stop	cyto	0.443859
stop	mito	0.293088
stop	er	0.0257683
stop	MOLECULAR.WEIGHT..in.Daltons.	0.421839
stop	PI	0.614628
stop	CAI..Codon.Adaptation.Index.	0.850296
stop	PROTEIN.LENGTH	0.398375
stop	CODON.BIAS	0.308604
stop	ALA	0.101599
stop	ARG	0.135522
stop	ASN	0.26222
stop	ASP	0.388378
stop	CYS	0.181589
stop	GLN	0.230853
stop	GLU	0.949879
stop	GLY	0.105192
stop	HIS	0.270486
stop	ILE	0.914475
stop	LEU	0.534546
stop	LYS	0.907281
stop	MET	0.253783
stop	PHE	0.60915
stop	PRO	0.429231
stop	SER	0.616851
stop	THR	0.529863
stop	TRP	0.840454
stop	TYR	0.36679
stop	VAL	0.244264
stop	FOP.SCORE..Frequency.of.Optimal.Codons.	0.395718
stop	GRAVY.SCORE..Hydropathicity.of.Protein.	0.93489
stop	AROMATICITY.SCORE..Frequency.of.aromatic.amino.acids..Phe..Tyr..Trp.	0.999716
stop	lu3.x	0.949404
stop	u3A	0.598858
stop	u3C	0.479894
stop	u3T	0.0374176
stop	u3G	0.0166348
stop	u3AC	0.724762
stop	u3AT	0.333527
stop	u3AG	0.151248
stop	u3CT	0.958691
stop	u3CG	0.52883
stop	u3TG	0.0857105
stop	X3AUel	0.970918
stop	lu5.x	0.146473
stop	u5A	0.179189
stop	u5C	0.859778
stop	u5T	0.0415585
stop	u5G	0.931477
stop	u5AC	0.469862
stop	u5AT	0.168473
stop	u5AG	0.646716
stop	u5CT	0.251128
stop	u5CG	0.915323
stop	u5TG	0.366777
stop	X5AUel	0.172316
stop	lcds	0.40343
stop	cdsA	0.000564031
stop	cdsC	0.00276823
stop	cdsT	0.308981
stop	cdsG	0.00416846
stop	cdsAC	0.357875
stop	cdsAT	0.0599167
stop	cdsAG	0.0888261
stop	cdsCT	0.0644848
stop	cdsCG	9.05e-05
stop	cdsTG	0.0444266
stop	cdsAUel	0.386696
stop	lorf.x	0.367424
stop	nostems	0.261114
stop	relstems	0.208816
stop	length	0.348352
stop	lu3.y	0.82398
stop	lu5.y	0.173071
stop	lorf.y	0.420749
stop	relnostems	0.094731
stop	X3stems	0.809157
stop	X5stems	0.7736
stop	orfstems	0.111162
stop	c3	0.921794
stop	c5	0.269488
stop	co	0.294931
stop	orflength	0.37355
stop	score	0.264006
stop	energy	0.120372
stop	CDS_AVG	0.120372
stop	CDS_SDV	0.178152
stop	CDS_RELSTDEV	0.128581
stop	CDS_LN	0.398374
stop	CDS_MIN	0.0244715
stop	CDS_Q25	0.407725
stop	CDS_MEDIAN	0.813009
stop	CDS_Q75	0.287838
stop	CDS_MAX	0.441396
stop	CDS_FIRST10_AVG	0.861774
stop	CDS_FIRST10_SDV	0.964725
stop	CDS_FIRST10_RELSDV	0.864436
stop	CDS_LAST10_AVG	0.669581
stop	CDS_LAST10_SDV	0.0783645
stop	CDS_LAST10_RELSDV	0.893777
stop	X5UTR_AVG	0.694232
stop	X5UTR_SDV	0.87581
stop	X5UTR_RELSTDEV	0.116649
stop	X5UTR_LN	0.165406
stop	X5UTR_MIN	0.411495
stop	X5UTR_Q25	0.892658
stop	X5UTR_MEDIAN	0.715992
stop	X5UTR_Q75	0.863025
stop	X5UTR_MAX	0.957282
stop	X5UTR_FIRST10_AVG	0.733088
stop	X5UTR_FIRST10_SDV	0.386688
stop	X5UTR_FIRST10_RELSDV	0.464816
stop	X5UTR_LAST10_AVG	0.576854
stop	X5UTR_LAST10_SDV	0.452164
stop	X5UTR_LAST10_RELSDV	0.850746
stop	X3UTR_AVG	0.791954
stop	X3UTR_SDV	0.408983
stop	X3UTR_RELSTDEV	0.309844
stop	X3UTR_LN	0.792771
stop	X3UTR_MIN	0.319094
stop	X3UTR_Q23	0.165793
stop	X3UTR_MEDIAN	0.231239
stop	X3UTR_Q73	0.402872
stop	X3UTR_MAX	0.960209
stop	X3UTR_FIRST10_AVG	0.929411
stop	X3UTR_FIRST10_SDV	0.632764
stop	X3UTR_FIRST10_RELSDV	0.44476
stop	X3UTR_LAST10_SDV	0.654407
stop	X3UTR_LAST10_RELSDV	0.654407
protlength	pH	1.57e-19
protlength	G	0.106943
protlength	A	0.00332206
protlength	L	2.52e-06
protlength	M	0.0137139
protlength	F	5.17e-15
protlength	W	1.16e-11
protlength	K	5.51e-26
protlength	Q	0.179734
protlength	E	0.085152
protlength	S	7.57e-31
protlength	P	1.79e-10
protlength	V	6.5e-06
protlength	I	5.66e-14
protlength	C	0.00061865
protlength	Y	3.15e-05
protlength	H	1.05e-05
protlength	R	1.42e-11
protlength	N	4.71e-29
protlength	D	3.91e-11
protlength	T	3.32e-09
protlength	ncont	6.64e-10
protlength	scont	0.00505513
protlength	Number.of.introns	1.7e-44
protlength	First.intron.length	4.17e-44
protlength	First.intron.GC	2.12e-44
protlength	mRNA.half.life.short	0.208988
protlength	Ribosome.occupancy	4.12e-147
protlength	Ribosome.density..rb.kb.	5.1e-203
protlength	mRNA.level	6.87e-37
protlength	GO.0006259_DNA_METABOLISM	0.215356
protlength	GO.0006350_TRANSCRIPTION	0.35477
protlength	GO.0006412_PROTEIN_BIOSYNTHESIS	2.71e-22
protlength	GO.0006810_TRANSPORT	3.33e-05
protlength	GO.0007049_CELL_CYCLE	0.217712
protlength	GO.0007165_SIGNAL_TRANSDUCTION	0.0226257
protlength	GO.0008150_BIOLOGICAL_PROCESS	2.62e-08
protlength	GO.0016070_RNA_METABOLISM	0.138559
protlength	nuc	0.000895522
protlength	vac	0.0061091
protlength	cyto	0.0705735
protlength	mito	5.73e-07
protlength	er	3.31e-07
protlength	PI	1.55e-19
protlength	CAI..Codon.Adaptation.Index.	0.545547
protlength	CODON.BIAS	0.00332827
protlength	CYS	1.61e-302
protlength	FOP.SCORE..Frequency.of.Optimal.Codons.	0.00606024
protlength	GRAVY.SCORE..Hydropathicity.of.Protein.	4.76e-05
protlength	AROMATICITY.SCORE..Frequency.of.aromatic.amino.acids..Phe..Tyr..Trp.	9.06e-10
protlength	lu3.x	0.239325
protlength	u3A	0.0841616
protlength	u3C	0.00784744
protlength	u3T	0.14471
protlength	u3G	0.0320682
protlength	u3AC	0.754087
protlength	u3AT	0.614018
protlength	u3AG	0.775071
protlength	u3CT	0.0126276
protlength	u3CG	0.0107771
protlength	u3TG	0.640093
protlength	X3AUel	0.180216
protlength	lu5.x	1.16e-40
protlength	u5A	8.03e-36
protlength	u5C	0.141082
protlength	u5T	1.22e-35
protlength	u5G	4.95e-05
protlength	u5AC	3.07e-09
protlength	u5AT	0.0915952
protlength	u5AG	0.305143
protlength	u5CT	6.24e-15
protlength	u5CG	0.0382313
protlength	u5TG	3.96e-22
protlength	X5AUel	1.02e-40
protlength	cdsA	0.107638
protlength	cdsC	0.0275184
protlength	cdsT	4.05e-44
protlength	cdsG	2.71e-41
protlength	cdsAC	0.277552
protlength	cdsAT	9.54e-47
protlength	cdsAG	2.77e-50
protlength	cdsCT	0.00204828
protlength	cdsCG	0.106566
protlength	cdsTG	0.654628
protlength	lu3.y	0.320117
protlength	lu5.y	2.43e-40
protlength	relnostems	0.526562
protlength	X3stems	0.00122661
protlength	X5stems	0.362051
protlength	orfstems	2.42e-41
protlength	c3	0.0119491
protlength	c5	1.68e-40
protlength	score	1.12e-200
protlength	CDS_AVG	0.000132186
protlength	CDS_SDV	3.54e-70
protlength	CDS_RELSTDEV	1.25e-15
protlength	CDS_MIN	0.000218318
protlength	CDS_Q25	5.12e-113
protlength	CDS_MEDIAN	1.35e-13
protlength	CDS_Q75	1.97e-19
protlength	CDS_MAX	0.0203019
protlength	CDS_FIRST10_AVG	4e-08
protlength	CDS_FIRST10_SDV	5.31e-29
protlength	CDS_FIRST10_RELSDV	0.0650194
protlength	CDS_LAST10_AVG	3.99e-09
protlength	CDS_LAST10_SDV	2.56e-12
protlength	CDS_LAST10_RELSDV	0.077064
protlength	X5UTR_AVG	2.56e-14
protlength	X5UTR_SDV	3.14e-30
protlength	X5UTR_RELSTDEV	1.16e-08
protlength	X5UTR_LN	3.52e-40
protlength	X5UTR_MIN	2.02e-05
protlength	X5UTR_Q25	5.98e-43
protlength	X5UTR_MEDIAN	0.000124959
protlength	X5UTR_Q75	0.000626154
protlength	X5UTR_MAX	0.470859
protlength	X5UTR_FIRST10_AVG	4.08e-14
protlength	X5UTR_FIRST10_SDV	1.18e-23
protlength	X5UTR_FIRST10_RELSDV	0.000888714
protlength	X5UTR_LAST10_AVG	6.38e-09
protlength	X5UTR_LAST10_SDV	1.46e-18
protlength	X5UTR_LAST10_RELSDV	0.000220194
protlength	X3UTR_AVG	4.09e-08
protlength	X3UTR_SDV	9.28e-27
protlength	X3UTR_RELSTDEV	0.152626
protlength	X3UTR_LN	0.330281
protlength	X3UTR_MIN	3.21e-18
protlength	X3UTR_Q23	4.16e-19
protlength	X3UTR_MEDIAN	0.121408
protlength	X3UTR_Q73	1.04e-21
protlength	X3UTR_MAX	1.22e-16
protlength	X3UTR_FIRST10_AVG	1.21e-08
protlength	X3UTR_FIRST10_SDV	5.1e-14
protlength	X3UTR_FIRST10_RELSDV	0.654175
protlength	X3UTR_LAST10_SDV	0.10458
protlength	X3UTR_LAST10_RELSDV	0.10458
pH	kDa	1.46e-18
pH	G	0.0161111
pH	A	0.084798
pH	L	0.515426
pH	M	0.160124
pH	F	0.347051
pH	W	0.3592
pH	K	7.2e-84
pH	Q	0.970289
pH	E	2.15e-137
pH	S	0.129069
pH	P	1.01e-10
pH	V	0.00124965
pH	I	0.0943716
pH	C	5.95e-05
pH	Y	0.388578
pH	H	2.4e-11
pH	R	3.98e-112
pH	N	6.06e-08
pH	D	1.44e-227
pH	T	0.576929
pH	ncont	2.67e-152
pH	scont	0.533966
pH	Number.of.introns	2.82e-21
pH	First.intron.length	5.36e-21
pH	First.intron.GC	2.21e-21
pH	mRNA.half.life.short	0.0964275
pH	Ribosome.occupancy	0.0303854
pH	Ribosome.density..rb.kb.	0.272678
pH	ORF.length..nt.	4.16e-13
pH	mRNA.level	0.552307
pH	GO.0006259_DNA_METABOLISM	0.138794
pH	GO.0006350_TRANSCRIPTION	0.00104455
pH	GO.0006412_PROTEIN_BIOSYNTHESIS	3.57e-38
pH	GO.0006810_TRANSPORT	0.00135178
pH	GO.0007049_CELL_CYCLE	0.523077
pH	GO.0007165_SIGNAL_TRANSDUCTION	0.0279655
pH	GO.0008150_BIOLOGICAL_PROCESS	0.250696
pH	GO.0016070_RNA_METABOLISM	0.0271721
pH	nuc	1.32e-14
pH	vac	7.21e-10
pH	cyto	2.33e-09
pH	mito	6.22e-45
pH	er	0.193483
pH	MOLECULAR.WEIGHT..in.Daltons.	1.47e-18
pH	CAI..Codon.Adaptation.Index.	0.209026
pH	PROTEIN.LENGTH	1.58e-19
pH	CODON.BIAS	0.0073384
pH	ALA	2.83e-15
pH	ARG	1.57e-05
pH	ASN	2.98e-21
pH	ASP	9.21e-95
pH	CYS	1.75e-14
pH	GLN	6.85e-17
pH	GLU	6.36e-82
pH	GLY	3.79e-13
pH	HIS	0.00333234
pH	ILE	7.84e-15
pH	LEU	1.43e-12
pH	LYS	0.425762
pH	MET	3.22e-10
pH	PHE	1.36e-09
pH	PRO	4.77e-07
pH	SER	1.78e-17
pH	THR	8.73e-16
pH	TRP	2.45e-08
pH	TYR	1.83e-15
pH	VAL	1.08e-13
pH	FOP.SCORE..Frequency.of.Optimal.Codons.	0.482699
pH	GRAVY.SCORE..Hydropathicity.of.Protein.	0.294513
pH	AROMATICITY.SCORE..Frequency.of.aromatic.amino.acids..Phe..Tyr..Trp.	0.818711
pH	lu3.x	0.711463
pH	u3A	0.161965
pH	u3C	0.254772
pH	u3T	5.79e-06
pH	u3G	0.000109838
pH	u3AC	0.0022682
pH	u3AT	0.0241814
pH	u3AG	2.66e-05
pH	u3CT	0.0718907
pH	u3CG	0.0305457
pH	u3TG	0.147057
pH	X3AUel	0.634579
pH	lu5.x	0.0363067
pH	u5A	0.131908
pH	u5C	0.573191
pH	u5T	9.02e-06
pH	u5G	0.000661746
pH	u5AC	0.313191
pH	u5AT	0.0110824
pH	u5AG	9.7e-05
pH	u5CT	0.00301871
pH	u5CG	0.0810168
pH	u5TG	0.703015
pH	X5AUel	0.0324468
pH	lcds	6.18e-19
pH	cdsA	0.381941
pH	cdsC	1.61e-06
pH	cdsT	0.000506141
pH	cdsG	0.00246442
pH	cdsAC	3.36e-05
pH	cdsAT	4.14e-19
pH	cdsAG	1.19e-08
pH	cdsCT	0.0431797
pH	cdsCG	6.02e-09
pH	cdsTG	1.08e-29
pH	cdsAUel	1.28e-19
pH	lorf.x	2.96e-18
pH	nostems	1.5e-19
pH	relstems	2.1e-09
pH	length	9.44e-19
pH	lu3.y	0.727892
pH	lu5.y	0.0355119
pH	lorf.y	1.46e-19
pH	relnostems	0.0110606
pH	X3stems	0.240922
pH	X5stems	0.185402
pH	orfstems	0.964767
pH	c3	0.763077
pH	c5	0.191042
pH	co	1.17e-20
pH	orflength	7.13e-19
pH	score	3.41e-14
pH	energy	8.12e-20
pH	CDS_AVG	0.000106934
pH	CDS_SDV	0.910959
pH	CDS_RELSTDEV	5.54e-07
pH	CDS_LN	1.57e-19
pH	CDS_MIN	0.042321
pH	CDS_Q25	7.26e-06
pH	CDS_MEDIAN	0.839483
pH	CDS_Q75	0.452366
pH	CDS_MAX	0.137226
pH	CDS_FIRST10_AVG	0.905937
pH	CDS_FIRST10_SDV	0.108061
pH	CDS_FIRST10_RELSDV	0.689918
pH	CDS_LAST10_AVG	0.801161
pH	CDS_LAST10_SDV	0.669107
pH	CDS_LAST10_RELSDV	0.866086
pH	X5UTR_AVG	0.0578411
pH	X5UTR_SDV	0.606595
pH	X5UTR_RELSTDEV	0.0240988
pH	X5UTR_LN	0.0366777
pH	X5UTR_MIN	0.0231861
pH	X5UTR_Q25	0.00329801
pH	X5UTR_MEDIAN	4.96e-05
pH	X5UTR_Q75	0.00109825
pH	X5UTR_MAX	0.025408
pH	X5UTR_FIRST10_AVG	0.459615
pH	X5UTR_FIRST10_SDV	0.886141
pH	X5UTR_FIRST10_RELSDV	0.0033451
pH	X5UTR_LAST10_AVG	0.661818
pH	X5UTR_LAST10_SDV	0.416099
pH	X5UTR_LAST10_RELSDV	0.199913
pH	X3UTR_AVG	0.468821
pH	X3UTR_SDV	0.735373
pH	X3UTR_RELSTDEV	0.803834
pH	X3UTR_LN	0.679684
pH	X3UTR_MIN	0.373012
pH	X3UTR_Q23	0.00221224
pH	X3UTR_MEDIAN	0.702911
pH	X3UTR_Q73	0.449293
pH	X3UTR_MAX	0.389083
pH	X3UTR_FIRST10_AVG	0.957881
pH	X3UTR_FIRST10_SDV	0.381079
pH	X3UTR_FIRST10_RELSDV	0.255587
pH	X3UTR_LAST10_SDV	0.989996
pH	X3UTR_LAST10_RELSDV	0.989996
kDa	G	0.00792041
kDa	A	5.22e-05
kDa	L	1.18e-07
kDa	M	0.0260766
kDa	F	1.58e-17
kDa	W	9.95e-14
kDa	K	6.21e-24
kDa	Q	0.292294
kDa	E	0.0262452
kDa	S	2.95e-28
kDa	P	1.56e-10
kDa	V	6.38e-07
kDa	I	7.94e-15
kDa	C	0.000386386
kDa	Y	9.66e-07
kDa	H	7.09e-07
kDa	R	1.01e-09
kDa	N	2.94e-30
kDa	D	4.72e-12
kDa	T	9.62e-08
kDa	ncont	1.23e-07
kDa	scont	0.0100877
kDa	Number.of.introns	2.12e-44
kDa	First.intron.length	5.39e-44
kDa	First.intron.GC	2.48e-44
kDa	mRNA.half.life.short	0.249689
kDa	Ribosome.occupancy	1.58e-150
kDa	Ribosome.density..rb.kb.	4.32e-207
kDa	mRNA.level	6.66e-40
kDa	GO.0006259_DNA_METABOLISM	0.228088
kDa	GO.0006350_TRANSCRIPTION	0.320446
kDa	GO.0006412_PROTEIN_BIOSYNTHESIS	3.78e-22
kDa	GO.0006810_TRANSPORT	6.97e-05
kDa	GO.0007049_CELL_CYCLE	0.212089
kDa	GO.0007165_SIGNAL_TRANSDUCTION	0.0221121
kDa	GO.0008150_BIOLOGICAL_PROCESS	4.52e-08
kDa	GO.0016070_RNA_METABOLISM	0.172299
kDa	nuc	0.000994403
kDa	vac	0.00744995
kDa	cyto	0.0894803
kDa	mito	4.07e-07
kDa	er	3.7e-07
kDa	PI	1.44e-18
kDa	CAI..Codon.Adaptation.Index.	0.300653
kDa	CODON.BIAS	0.000347682
kDa	CYS	1.73e-304
kDa	FOP.SCORE..Frequency.of.Optimal.Codons.	0.000951831
kDa	GRAVY.SCORE..Hydropathicity.of.Protein.	0.000362331
kDa	AROMATICITY.SCORE..Frequency.of.aromatic.amino.acids..Phe..Tyr..Trp.	1.84e-12
kDa	lu3.x	0.192684
kDa	u3A	0.0814538
kDa	u3C	0.00894758
kDa	u3T	0.192288
kDa	u3G	0.0449134
kDa	u3AC	0.673071
kDa	u3AT	0.592874
kDa	u3AG	0.750862
kDa	u3CT	0.011458
kDa	u3CG	0.0119383
kDa	u3TG	0.76349
kDa	X3AUel	0.1433
kDa	lu5.x	5.76e-40
kDa	u5A	8.98e-37
kDa	u5C	0.107534
kDa	u5T	1.31e-35
kDa	u5G	8.11e-06
kDa	u5AC	1.19e-09
kDa	u5AT	0.11298
kDa	u5AG	0.392189
kDa	u5CT	1.57e-14
kDa	u5CG	0.0318002
kDa	u5TG	2.33e-23
kDa	X5AUel	4.99e-40
kDa	cdsA	0.417919
kDa	cdsC	0.00367068
kDa	cdsT	2.48e-44
kDa	cdsG	1.19e-43
kDa	cdsAC	0.254175
kDa	cdsAT	7.66e-52
kDa	cdsAG	4.01e-48
kDa	cdsCT	0.0127968
kDa	cdsCG	0.0456014
kDa	cdsTG	0.99018
kDa	lu3.y	0.258991
kDa	lu5.y	1.17e-39
kDa	relnostems	0.459568
kDa	X3stems	0.00141308
kDa	X5stems	0.276183
kDa	orfstems	2.3e-42
kDa	c3	0.0100622
kDa	c5	3.01e-40
kDa	score	1.85e-193
kDa	CDS_AVG	0.0018116
kDa	CDS_SDV	4.55e-75
kDa	CDS_RELSTDEV	1.31e-13
kDa	CDS_MIN	0.000723007
kDa	CDS_Q25	9.8e-116
kDa	CDS_MEDIAN	1e-15
kDa	CDS_Q75	3.07e-22
kDa	CDS_MAX	0.0790866
kDa	CDS_FIRST10_AVG	1.21e-08
kDa	CDS_FIRST10_SDV	1.39e-30
kDa	CDS_FIRST10_RELSDV	0.0583575
kDa	CDS_LAST10_AVG	1.04e-09
kDa	CDS_LAST10_SDV	2.84e-13
kDa	CDS_LAST10_RELSDV	0.0822869
kDa	X5UTR_AVG	9.26e-15
kDa	X5UTR_SDV	3.48e-32
kDa	X5UTR_RELSTDEV	1e-08
kDa	X5UTR_LN	1.7e-39
kDa	X5UTR_MIN	4.75e-06
kDa	X5UTR_Q25	1.84e-44
kDa	X5UTR_MEDIAN	0.000178833
kDa	X5UTR_Q75	0.000180314
kDa	X5UTR_MAX	0.269551
kDa	X5UTR_FIRST10_AVG	9.29e-15
kDa	X5UTR_FIRST10_SDV	7.64e-25
kDa	X5UTR_FIRST10_RELSDV	0.00102913
kDa	X5UTR_LAST10_AVG	3.3e-09
kDa	X5UTR_LAST10_SDV	9.56e-20
kDa	X5UTR_LAST10_RELSDV	0.000147187
kDa	X3UTR_AVG	1.42e-08
kDa	X3UTR_SDV	3.7e-28
kDa	X3UTR_RELSTDEV	0.159955
kDa	X3UTR_LN	0.266666
kDa	X3UTR_MIN	6.1e-19
kDa	X3UTR_Q23	1.51e-19
kDa	X3UTR_MEDIAN	0.0852821
kDa	X3UTR_Q73	1.82e-23
kDa	X3UTR_MAX	1.02e-17
kDa	X3UTR_FIRST10_AVG	2.76e-09
kDa	X3UTR_FIRST10_SDV	8.23e-15
kDa	X3UTR_FIRST10_RELSDV	0.658971
kDa	X3UTR_LAST10_SDV	0.104036
kDa	X3UTR_LAST10_RELSDV	0.104036
G	A	4.43e-39
G	L	6.69e-34
G	M	0.0265971
G	F	0.152501
G	W	0.594631
G	K	3.62e-09
G	Q	5.44e-25
G	E	8.66e-20
G	S	9.4e-26
G	P	0.238147
G	V	2.41e-40
G	I	0.1669
G	C	0.00473015
G	Y	0.890385
G	H	0.0188523
G	R	0.00986453
G	N	5.8e-37
G	D	5.76e-09
G	T	0.618496
G	ncont	4.62e-27
G	scont	0.000575833
G	Number.of.introns	0.00923073
G	First.intron.length	0.0116936
G	First.intron.GC	0.00746436
G	mRNA.half.life.short	0.77525
G	Ribosome.occupancy	3.32e-20
G	Ribosome.density..rb.kb.	4.5e-15
G	ORF.length..nt.	0.0365877
G	mRNA.level	1.41e-47
G	GO.0006259_DNA_METABOLISM	0.113736
G	GO.0006350_TRANSCRIPTION	1e-08
G	GO.0006412_PROTEIN_BIOSYNTHESIS	0.0027395
G	GO.0006810_TRANSPORT	8.03e-06
G	GO.0007049_CELL_CYCLE	0.0101441
G	GO.0007165_SIGNAL_TRANSDUCTION	0.0413337
G	GO.0008150_BIOLOGICAL_PROCESS	0.00504662
G	GO.0016070_RNA_METABOLISM	0.0690154
G	nuc	0.636413
G	vac	0.936166
G	cyto	8.43e-06
G	mito	0.00532858
G	er	0.415679
G	MOLECULAR.WEIGHT..in.Daltons.	0.0079179
G	PI	0.016105
G	CAI..Codon.Adaptation.Index.	1.64e-26
G	PROTEIN.LENGTH	0.106954
G	CODON.BIAS	2.2e-50
G	ALA	6.04e-07
G	ARG	0.00101946
G	ASN	6.32e-11
G	ASP	4.17e-05
G	CYS	0.230267
G	GLN	2.63e-11
G	GLU	3.62e-09
G	GLY	1.16e-123
G	HIS	0.000208562
G	ILE	0.0624072
G	LEU	2.2e-08
G	LYS	9.27e-08
G	MET	0.62179
G	PHE	0.0141886
G	PRO	0.0310219
G	SER	1.19e-08
G	THR	0.151605
G	TRP	0.194644
G	TYR	0.0493738
G	VAL	0.000254704
G	FOP.SCORE..Frequency.of.Optimal.Codons.	4.86e-39
G	GRAVY.SCORE..Hydropathicity.of.Protein.	3.05e-27
G	AROMATICITY.SCORE..Frequency.of.aromatic.amino.acids..Phe..Tyr..Trp.	0.873451
G	lu3.x	0.690934
G	u3A	0.299463
G	u3C	0.00739216
G	u3T	2.14e-06
G	u3G	0.0601554
G	u3AC	9.98e-05
G	u3AT	0.00935208
G	u3AG	0.405142
G	u3CT	0.804132
G	u3CG	0.360636
G	u3TG	0.654834
G	X3AUel	0.77827
G	lu5.x	0.780859
G	u5A	8.65e-09
G	u5C	0.364595
G	u5T	0.233962
G	u5G	1.72e-07
G	u5AC	0.412996
G	u5AT	0.196727
G	u5AG	0.971798
G	u5CT	0.254115
G	u5CG	0.0146763
G	u5TG	1.65e-09
G	X5AUel	0.827587
G	lcds	0.0993302
G	cdsA	6.77e-102
G	cdsC	0.396143
G	cdsT	0.00252967
G	cdsG	6.18e-163
G	cdsAC	2.07e-12
G	cdsAT	2.59e-33
G	cdsAG	9.57e-05
G	cdsCT	0.872191
G	cdsCG	1.7e-10
G	cdsTG	7.85e-100
G	cdsAUel	0.118537
G	lorf.x	0.0716456
G	nostems	0.364168
G	relstems	0.069104
G	length	0.075306
G	lu3.y	0.599561
G	lu5.y	0.794222
G	lorf.y	0.119053
G	relnostems	7.92e-14
G	X3stems	0.965946
G	X5stems	0.0522732
G	orfstems	2.37e-10
G	c3	0.864479
G	c5	0.833845
G	co	0.438021
G	orflength	0.0850909
G	score	0.00175669
G	energy	0.114871
G	CDS_AVG	1.84e-24
G	CDS_SDV	4.15e-60
G	CDS_RELSTDEV	0.00167658
G	CDS_LN	0.106943
G	CDS_MIN	3.24e-31
G	CDS_Q25	2.03e-33
G	CDS_MEDIAN	2.09e-40
G	CDS_Q75	4e-47
G	CDS_MAX	9.92e-39
G	CDS_FIRST10_AVG	1.03e-05
G	CDS_FIRST10_SDV	1.38e-20
G	CDS_FIRST10_RELSDV	0.290767
G	CDS_LAST10_AVG	1.24e-05
G	CDS_LAST10_SDV	3.82e-13
G	CDS_LAST10_RELSDV	0.610248
G	X5UTR_AVG	0.000995329
G	X5UTR_SDV	1.03e-21
G	X5UTR_RELSTDEV	0.369591
G	X5UTR_LN	0.791711
G	X5UTR_MIN	7.46e-18
G	X5UTR_Q25	1.04e-15
G	X5UTR_MEDIAN	0.198602
G	X5UTR_Q75	4.14e-08
G	X5UTR_MAX	3.33e-12
G	X5UTR_FIRST10_AVG	5.08e-05
G	X5UTR_FIRST10_SDV	1.96e-08
G	X5UTR_FIRST10_RELSDV	0.962212
G	X5UTR_LAST10_AVG	0.000125373
G	X5UTR_LAST10_SDV	1.17e-19
G	X5UTR_LAST10_RELSDV	0.00274155
G	X3UTR_AVG	1.92e-07
G	X3UTR_SDV	5.23e-17
G	X3UTR_RELSTDEV	0.496501
G	X3UTR_LN	0.533014
G	X3UTR_MIN	3.85e-09
G	X3UTR_Q23	3.73e-07
G	X3UTR_MEDIAN	0.0795748
G	X3UTR_Q73	7.31e-19
G	X3UTR_MAX	2.94e-13
G	X3UTR_FIRST10_AVG	3.22e-11
G	X3UTR_FIRST10_SDV	7.5e-14
G	X3UTR_FIRST10_RELSDV	0.0511213
G	X3UTR_LAST10_SDV	0.0756159
G	X3UTR_LAST10_RELSDV	0.0756159
A	L	2.23e-34
A	M	1.96e-05
A	F	1.11e-23
A	W	8.15e-12
A	K	0.470644
A	Q	2.79e-07
A	E	0.00252366
A	S	2.31e-18
A	P	0.00432583
A	V	1.05e-25
A	I	9.78e-18
A	C	5.36e-21
A	Y	3.49e-14
A	H	4.3e-24
A	R	0.0558923
A	N	1.47e-51
A	D	2.57e-19
A	T	0.0888234
A	ncont	1.41e-19
A	scont	8.67e-17
A	Number.of.introns	4.95e-11
A	First.intron.length	7.11e-11
A	First.intron.GC	4.09e-11
A	mRNA.half.life.short	0.200737
A	Ribosome.occupancy	4.25e-30
A	Ribosome.density..rb.kb.	1.58e-19
A	ORF.length..nt.	0.0054904
A	mRNA.level	1.24e-84
A	GO.0006259_DNA_METABOLISM	0.264398
A	GO.0006350_TRANSCRIPTION	0.000128268
A	GO.0006412_PROTEIN_BIOSYNTHESIS	2.07e-10
A	GO.0006810_TRANSPORT	0.000900398
A	GO.0007049_CELL_CYCLE	0.0470723
A	GO.0007165_SIGNAL_TRANSDUCTION	0.000418184
A	GO.0008150_BIOLOGICAL_PROCESS	2.48e-05
A	GO.0016070_RNA_METABOLISM	1.3e-05
A	nuc	0.000617464
A	vac	0.747921
A	cyto	0.242163
A	mito	6.66e-06
A	er	0.601097
A	MOLECULAR.WEIGHT..in.Daltons.	5.2e-05
A	PI	0.0845778
A	CAI..Codon.Adaptation.Index.	7.09e-99
A	PROTEIN.LENGTH	0.00331506
A	CODON.BIAS	4.95e-148
A	ALA	8.64e-111
A	ARG	0.00027839
A	ASN	2.74e-17
A	ASP	1.35e-09
A	CYS	1.34e-16
A	GLN	3.24e-07
A	GLU	0.000244853
A	GLY	1.63e-05
A	HIS	4.33e-16
A	ILE	2.44e-08
A	LEU	1.12e-11
A	LYS	0.000557826
A	MET	4.69e-06
A	PHE	5.49e-13
A	PRO	8.08e-05
A	SER	1.22e-07
A	THR	0.331971
A	TRP	1.93e-12
A	TYR	3.12e-11
A	VAL	0.142033
A	FOP.SCORE..Frequency.of.Optimal.Codons.	3.49e-120
A	GRAVY.SCORE..Hydropathicity.of.Protein.	9.36e-20
A	AROMATICITY.SCORE..Frequency.of.aromatic.amino.acids..Phe..Tyr..Trp.	2.78e-30
A	lu3.x	0.0612256
A	u3A	0.48734
A	u3C	0.728068
A	u3T	2.48e-08
A	u3G	4.3e-09
A	u3AC	0.197584
A	u3AT	0.647278
A	u3AG	1.8e-05
A	u3CT	0.0183643
A	u3CG	0.851153
A	u3TG	2.77e-05
A	X3AUel	0.0758595
A	lu5.x	0.947641
A	u5A	7.66e-13
A	u5C	0.0103373
A	u5T	0.000213819
A	u5G	1.05e-18
A	u5AC	1.56e-09
A	u5AT	0.00654761
A	u5AG	0.0101265
A	u5CT	0.946518
A	u5CG	0.0142116
A	u5TG	6.01e-13
A	X5AUel	0.915791
A	lcds	0.00316849
A	cdsA	8.79e-80
A	cdsC	1.91e-55
A	cdsT	7.91e-05
A	cdsG	3.44e-54
A	cdsAC	0.000981192
A	cdsAT	3.14e-136
A	cdsAG	0.317441
A	cdsCT	6.24e-69
A	cdsCG	1.15e-09
A	cdsTG	9.03e-51
A	cdsAUel	0.00440036
A	lorf.x	0.00656167
A	nostems	0.0374082
A	relstems	0.000892444
A	length	0.0068735
A	lu3.y	0.0301962
A	lu5.y	0.942761
A	lorf.y	0.00384539
A	relnostems	4.94e-09
A	X3stems	0.85936
A	X5stems	1.59e-05
A	orfstems	4.02e-17
A	c3	0.45901
A	c5	0.112996
A	co	0.0527921
A	orflength	0.00769606
A	score	4.25e-10
A	energy	0.601689
A	CDS_AVG	1.93e-97
A	CDS_SDV	9.35e-123
A	CDS_RELSTDEV	1.81e-42
A	CDS_LN	0.00332206
A	CDS_MIN	9.68e-56
A	CDS_Q25	6.41e-51
A	CDS_MEDIAN	7.1e-102
A	CDS_Q75	2.39e-126
A	CDS_MAX	2.87e-91
A	CDS_FIRST10_AVG	9.51e-22
A	CDS_FIRST10_SDV	1.39e-47
A	CDS_FIRST10_RELSDV	0.00923794
A	CDS_LAST10_AVG	1.77e-12
A	CDS_LAST10_SDV	7.36e-26
A	CDS_LAST10_RELSDV	0.887713
A	X5UTR_AVG	4.88e-12
A	X5UTR_SDV	1.26e-50
A	X5UTR_RELSTDEV	0.50093
A	X5UTR_LN	0.933884
A	X5UTR_MIN	5.29e-33
A	X5UTR_Q25	1.34e-26
A	X5UTR_MEDIAN	0.151284
A	X5UTR_Q75	7.59e-25
A	X5UTR_MAX	8.91e-33
A	X5UTR_FIRST10_AVG	6.25e-14
A	X5UTR_FIRST10_SDV	4.86e-25
A	X5UTR_FIRST10_RELSDV	0.823639
A	X5UTR_LAST10_AVG	1.67e-13
A	X5UTR_LAST10_SDV	1.71e-37
A	X5UTR_LAST10_RELSDV	0.0345596
A	X3UTR_AVG	2.51e-11
A	X3UTR_SDV	3.2e-36
A	X3UTR_RELSTDEV	0.164486
A	X3UTR_LN	0.0233477
A	X3UTR_MIN	3.87e-17
A	X3UTR_Q23	1.16e-13
A	X3UTR_MEDIAN	0.0036566
A	X3UTR_Q73	3.23e-40
A	X3UTR_MAX	1.4e-31
A	X3UTR_FIRST10_AVG	1.35e-17
A	X3UTR_FIRST10_SDV	4.5e-23
A	X3UTR_FIRST10_RELSDV	0.438043
A	X3UTR_LAST10_SDV	0.654574
A	X3UTR_LAST10_RELSDV	0.654574
L	M	0.00500202
L	F	1.3e-30
L	W	8.57e-12
L	K	3.18e-15
L	Q	0.889288
L	E	2.5e-05
L	S	0.572839
L	P	8.14e-15
L	V	0.00139231
L	I	6.88e-45
L	C	9.94e-10
L	Y	2.38e-11
L	H	0.619267
L	R	1.59e-05
L	N	0.197058
L	D	6.27e-05
L	T	6.32e-06
L	ncont	1.76e-19
L	scont	1.61e-05
L	Number.of.introns	1.36e-06
L	First.intron.length	1.79e-06
L	First.intron.GC	7.56e-07
L	mRNA.half.life.short	0.837464
L	Ribosome.occupancy	9.32e-12
L	Ribosome.density..rb.kb.	2.21e-11
L	ORF.length..nt.	5.95e-05
L	mRNA.level	2.12e-28
L	GO.0006259_DNA_METABOLISM	0.113363
L	GO.0006350_TRANSCRIPTION	0.108699
L	GO.0006412_PROTEIN_BIOSYNTHESIS	1.09e-13
L	GO.0006810_TRANSPORT	0.00472577
L	GO.0007049_CELL_CYCLE	0.466475
L	GO.0007165_SIGNAL_TRANSDUCTION	0.671885
L	GO.0008150_BIOLOGICAL_PROCESS	0.0451641
L	GO.0016070_RNA_METABOLISM	0.224311
L	nuc	5.41e-07
L	vac	0.000826799
L	cyto	4.81e-17
L	mito	0.111513
L	er	1.8e-11
L	MOLECULAR.WEIGHT..in.Daltons.	1.18e-07
L	PI	0.515912
L	CAI..Codon.Adaptation.Index.	4.84e-49
L	PROTEIN.LENGTH	2.52e-06
L	CODON.BIAS	2.82e-40
L	ALA	0.0519979
L	ARG	0.023383
L	ASN	0.000625494
L	ASP	0.215765
L	CYS	1.85e-15
L	GLN	0.000440047
L	GLU	0.149704
L	GLY	0.0429434
L	HIS	3.68e-06
L	ILE	2.59e-22
L	LEU	1.04e-110
L	LYS	0.162035
L	MET	1.78e-09
L	PHE	1.82e-24
L	PRO	0.374425
L	SER	0.000482645
L	THR	0.025258
L	TRP	5.92e-19
L	TYR	1.29e-15
L	VAL	0.000848614
L	FOP.SCORE..Frequency.of.Optimal.Codons.	3.03e-50
L	GRAVY.SCORE..Hydropathicity.of.Protein.	3.37e-121
L	AROMATICITY.SCORE..Frequency.of.aromatic.amino.acids..Phe..Tyr..Trp.	6.86e-30
L	lu3.x	0.00852008
L	u3A	0.0106171
L	u3C	0.56758
L	u3T	3.47e-08
L	u3G	4.23e-06
L	u3AC	0.2641
L	u3AT	0.413273
L	u3AG	5.52e-07
L	u3CT	0.000512585
L	u3CG	0.011763
L	u3TG	0.788966
L	X3AUel	0.0103055
L	lu5.x	0.895579
L	u5A	3.08e-06
L	u5C	0.153034
L	u5T	0.368258
L	u5G	1.2e-11
L	u5AC	0.00230996
L	u5AT	0.00187209
L	u5AG	0.00603923
L	u5CT	0.336397
L	u5CG	0.14374
L	u5TG	3.41e-09
L	X5AUel	0.894304
L	lcds	2.8e-06
L	cdsA	3.07e-07
L	cdsC	1.72e-20
L	cdsT	1.02e-92
L	cdsG	3.62e-32
L	cdsAC	1.06e-10
L	cdsAT	1.02e-51
L	cdsAG	2.79e-30
L	cdsCT	1.34e-15
L	cdsCG	6.45e-17
L	cdsTG	0.0111333
L	cdsAUel	4.34e-06
L	lorf.x	2.14e-05
L	nostems	0.000230175
L	relstems	0.00325903
L	length	2.36e-05
L	lu3.y	0.00681397
L	lu5.y	0.921551
L	lorf.y	4.72e-06
L	relnostems	1.9e-05
L	X3stems	0.754097
L	X5stems	0.0347034
L	orfstems	3.68e-08
L	c3	0.248013
L	c5	0.610554
L	co	8.55e-05
L	orflength	3.24e-05
L	score	0.0279614
L	energy	0.00019087
L	CDS_AVG	1.26e-18
L	CDS_SDV	9.04e-22
L	CDS_RELSTDEV	1.47e-11
L	CDS_LN	2.52e-06
L	CDS_MIN	0.000550529
L	CDS_Q25	6.08e-18
L	CDS_MEDIAN	1.33e-23
L	CDS_Q75	5.84e-29
L	CDS_MAX	3.41e-16
L	CDS_FIRST10_AVG	4.52e-06
L	CDS_FIRST10_SDV	1.35e-07
L	CDS_FIRST10_RELSDV	0.30425
L	CDS_LAST10_AVG	1.34e-07
L	CDS_LAST10_SDV	1.45e-05
L	CDS_LAST10_RELSDV	0.499138
L	X5UTR_AVG	0.0338327
L	X5UTR_SDV	3.37e-06
L	X5UTR_RELSTDEV	0.557371
L	X5UTR_LN	0.945027
L	X5UTR_MIN	1.12e-05
L	X5UTR_Q25	4.62e-07
L	X5UTR_MEDIAN	0.074453
L	X5UTR_Q75	0.0284303
L	X5UTR_MAX	9.43e-05
L	X5UTR_FIRST10_AVG	0.00529356
L	X5UTR_FIRST10_SDV	4.43e-06
L	X5UTR_FIRST10_RELSDV	0.401485
L	X5UTR_LAST10_AVG	0.036778
L	X5UTR_LAST10_SDV	0.000128025
L	X5UTR_LAST10_RELSDV	0.00402679
L	X3UTR_AVG	0.000616706
L	X3UTR_SDV	9.91e-09
L	X3UTR_RELSTDEV	0.335708
L	X3UTR_LN	0.00436091
L	X3UTR_MIN	0.000167916
L	X3UTR_Q23	0.0292161
L	X3UTR_MEDIAN	0.161077
L	X3UTR_Q73	4.51e-13
L	X3UTR_MAX	5.92e-10
L	X3UTR_FIRST10_AVG	1.41e-06
L	X3UTR_FIRST10_SDV	2.78e-09
L	X3UTR_FIRST10_RELSDV	0.715003
L	X3UTR_LAST10_SDV	0.00999138
L	X3UTR_LAST10_RELSDV	0.00999138
M	F	0.000275603
M	W	0.000112649
M	K	1.16e-21
M	Q	0.41965
M	E	1.44e-08
M	S	7.66e-06
M	P	0.0209256
M	V	0.041663
M	I	2.99e-06
M	C	1.54e-10
M	Y	0.000450577
M	H	0.0550683
M	R	0.0159809
M	N	0.000742938
M	D	0.000958456
M	T	0.00153912
M	ncont	0.00605301
M	Number.of.introns	6.98e-09
M	First.intron.length	6.22e-09
M	First.intron.GC	6.04e-09
M	mRNA.half.life.short	0.472276
M	Ribosome.occupancy	0.00296703
M	Ribosome.density..rb.kb.	0.0546449
M	ORF.length..nt.	0.126764
M	mRNA.level	0.000176172
M	GO.0006259_DNA_METABOLISM	0.222461
M	GO.0006350_TRANSCRIPTION	0.114975
M	GO.0006412_PROTEIN_BIOSYNTHESIS	0.000112161
M	GO.0006810_TRANSPORT	0.00367282
M	GO.0007049_CELL_CYCLE	0.0380487
M	GO.0007165_SIGNAL_TRANSDUCTION	0.191498
M	GO.0008150_BIOLOGICAL_PROCESS	0.919849
M	GO.0016070_RNA_METABOLISM	0.175846
M	nuc	0.702611
M	vac	0.0914511
M	cyto	0.0137857
M	mito	9.69e-06
M	er	0.00345276
M	MOLECULAR.WEIGHT..in.Daltons.	0.0261082
M	PI	0.160281
M	CAI..Codon.Adaptation.Index.	3.28e-18
M	PROTEIN.LENGTH	0.0137292
M	CODON.BIAS	2.02e-10
M	ALA	2.48e-05
M	ARG	0.239434
M	ASN	0.000548835
M	ASP	3.95e-05
M	CYS	0.000689304
M	GLN	0.0153419
M	GLU	3.02e-07
M	GLY	0.336799
M	HIS	0.665572
M	ILE	0.910675
M	LEU	0.507379
M	LYS	2.84e-14
M	MET	7.42e-163
M	PHE	0.97605
M	PRO	0.208212
M	SER	2.12e-05
M	THR	0.000309496
M	TRP	0.391669
M	TYR	0.950678
M	VAL	0.00190919
M	FOP.SCORE..Frequency.of.Optimal.Codons.	1.22e-12
M	GRAVY.SCORE..Hydropathicity.of.Protein.	1.43e-19
M	AROMATICITY.SCORE..Frequency.of.aromatic.amino.acids..Phe..Tyr..Trp.	5.72e-07
M	lu3.x	0.999302
M	u3A	0.85857
M	u3C	0.0342303
M	u3T	0.000859036
M	u3G	0.00863994
M	u3AC	0.414274
M	u3AT	0.445719
M	u3AG	0.00335649
M	u3CT	0.388223
M	u3CG	0.375993
M	u3TG	0.82524
M	X3AUel	0.97947
M	lu5.x	0.429445
M	u5A	0.45453
M	u5C	0.809458
M	u5T	0.964856
M	u5G	0.0166616
M	u5AC	0.492228
M	u5AT	0.615722
M	u5AG	0.0183131
M	u5CT	0.424425
M	u5CG	0.503522
M	u5TG	0.72423
M	X5AUel	0.410919
M	lcds	0.0142145
M	cdsA	1.15e-06
M	cdsC	0.000414019
M	cdsT	5.9e-05
M	cdsG	1.22e-06
M	cdsAC	3.69e-06
M	cdsAT	1.66e-28
M	cdsAG	2.17e-10
M	cdsCT	2.23e-06
M	cdsCG	0.844555
M	cdsTG	3.21e-24
M	cdsAUel	0.0140551
M	lorf.x	0.0178791
M	nostems	0.0349911
M	relstems	0.0161436
M	length	0.0183457
M	lu3.y	0.942695
M	lu5.y	0.386997
M	lorf.y	0.0138142
M	relnostems	0.301833
M	X3stems	0.299913
M	X5stems	0.786614
M	orfstems	0.0214428
M	c3	0.427731
M	c5	0.456734
M	co	0.0297288
M	orflength	0.0185321
M	score	0.383333
M	energy	0.0916593
M	CDS_AVG	0.000125839
M	CDS_SDV	0.0184189
M	CDS_RELSTDEV	0.22162
M	CDS_LN	0.0137139
M	CDS_MIN	0.0001701
M	CDS_Q25	0.0187562
M	CDS_MEDIAN	3.95e-05
M	CDS_Q75	0.000133113
M	CDS_MAX	0.000242122
M	CDS_FIRST10_AVG	0.220249
M	CDS_FIRST10_SDV	0.184068
M	CDS_FIRST10_RELSDV	0.691376
M	CDS_LAST10_AVG	0.280729
M	CDS_LAST10_SDV	0.0883388
M	CDS_LAST10_RELSDV	0.0355935
M	X5UTR_AVG	0.247296
M	X5UTR_SDV	0.05398
M	X5UTR_RELSTDEV	0.613819
M	X5UTR_LN	0.404951
M	X5UTR_MIN	0.234283
M	X5UTR_Q25	0.0359988
M	X5UTR_MEDIAN	0.107933
M	X5UTR_Q75	0.542284
M	X5UTR_MAX	0.425709
M	X5UTR_FIRST10_AVG	0.404844
M	X5UTR_FIRST10_SDV	0.180924
M	X5UTR_FIRST10_RELSDV	0.941242
M	X5UTR_LAST10_AVG	0.860951
M	X5UTR_LAST10_SDV	0.728653
M	X5UTR_LAST10_RELSDV	0.426595
M	X3UTR_AVG	0.00238207
M	X3UTR_SDV	0.003478
M	X3UTR_RELSTDEV	0.389396
M	X3UTR_LN	0.992186
M	X3UTR_MIN	0.0486203
M	X3UTR_Q23	0.128362
M	X3UTR_MEDIAN	0.894191
M	X3UTR_Q73	0.000501521
M	X3UTR_MAX	0.0223779
M	X3UTR_FIRST10_AVG	0.00728248
M	X3UTR_FIRST10_SDV	0.361127
M	X3UTR_FIRST10_RELSDV	0.490197
M	X3UTR_LAST10_SDV	0.728778
M	X3UTR_LAST10_RELSDV	0.728778
F	W	3.2e-65
F	K	1.11e-27
F	Q	1.81e-20
F	E	1.9e-26
F	S	0.754409
F	P	0.915458
F	V	0.202185
F	I	4.46e-34
F	C	9.72e-17
F	Y	7.79e-57
F	H	0.0948317
F	R	2.48e-27
F	N	0.242147
F	D	1.96e-10
F	T	0.0200574
F	ncont	2.5e-49
F	scont	4.76e-11
F	Number.of.introns	0.000133527
F	First.intron.length	0.000126457
F	First.intron.GC	0.000147969
F	mRNA.half.life.short	0.379446
F	Ribosome.occupancy	0.000210255
F	Ribosome.density..rb.kb.	6.3e-07
F	ORF.length..nt.	1.02e-11
F	mRNA.level	5.1e-09
F	GO.0006259_DNA_METABOLISM	0.927098
F	GO.0006350_TRANSCRIPTION	2.95e-14
F	GO.0006412_PROTEIN_BIOSYNTHESIS	4.06e-10
F	GO.0006810_TRANSPORT	4.02e-13
F	GO.0007049_CELL_CYCLE	0.21038
F	GO.0007165_SIGNAL_TRANSDUCTION	0.509839
F	GO.0008150_BIOLOGICAL_PROCESS	2.44e-06
F	GO.0016070_RNA_METABOLISM	0.74592
F	nuc	2.1e-19
F	vac	3.75e-13
[truncated: 12,781 more rows]

## Sheet: DS1b_significant_cors
#Significant correlations amongst features for budding yeast genes
tfcode	S	0.096071	0.096071
tfcode	Ribosome.occupancy	-0.105625	0.105625
tfcode	GO.0006350_TRANSCRIPTION	0.244032	0.244032
tfcode	nuc	0.134924	0.134924
tfcode	GRAVY.SCORE..Hydropathicity.of.Protein.	-0.106057	0.106057
chromosome	mRNA.half.life.short	-0.116995	0.116995
strand	lu3.x	-0.142109	0.142109
strand	X3AUel	-0.141088	0.141088
strand	lu3.y	-0.139885	0.139885
strand	c3	-0.128583	0.128583
strand	X3UTR_LN	-0.141713	0.141713
start	stop	0.99998	0.99998
protlength	pH	-0.174405	0.174405
protlength	kDa	0.999072	0.999072
protlength	F	0.15113	0.15113
protlength	W	0.13128	0.13128
protlength	K	-0.202722	0.202722
protlength	S	0.221593	0.221593
protlength	P	0.123466	0.123466
protlength	I	0.145263	0.145263
protlength	R	-0.130705	0.130705
protlength	N	0.21484	0.21484
protlength	D	0.127862	0.127862
protlength	T	0.114555	0.114555
protlength	ncont	-0.119544	0.119544
protlength	Number.of.introns	-0.266964	0.266964
protlength	First.intron.length	-0.265792	0.265792
protlength	First.intron.GC	-0.266679	0.266679
protlength	Ribosome.occupancy	-0.484942	0.484942
protlength	Ribosome.density..rb.kb.	-0.557003	0.557003
protlength	ORF.length..nt.	0.900645	0.900645
protlength	mRNA.level	-0.252311	0.252311
protlength	GO.0006412_PROTEIN_BIOSYNTHESIS	-0.18703	0.18703
protlength	GO.0008150_BIOLOGICAL_PROCESS	-0.107816	0.107816
protlength	mito	-0.107631	0.107631
protlength	er	0.109879	0.109879
protlength	MOLECULAR.WEIGHT..in.Daltons.	0.999072	0.999072
protlength	PI	-0.174435	0.174435
protlength	PROTEIN.LENGTH	1	1
protlength	ALA	0.8611	0.8611
protlength	ARG	0.810298	0.810298
protlength	ASN	0.904735	0.904735
protlength	ASP	0.889661	0.889661
protlength	CYS	0.637634	0.637634
protlength	GLN	0.838875	0.838875
protlength	GLU	0.860364	0.860364
protlength	GLY	0.861119	0.861119
protlength	HIS	0.797704	0.797704
protlength	ILE	0.916935	0.916935
protlength	LEU	0.928709	0.928709
protlength	LYS	0.848254	0.848254
protlength	MET	0.816359	0.816359
protlength	PHE	0.868296	0.868296
protlength	PRO	0.895064	0.895064
protlength	SER	0.916542	0.916542
protlength	THR	0.91912	0.91912
protlength	TRP	0.663268	0.663268
protlength	TYR	0.851404	0.851404
protlength	VAL	0.901101	0.901101
protlength	AROMATICITY.SCORE..Frequency.of.aromatic.amino.acids..Phe..Tyr..Trp.	0.118598	0.118598
protlength	lu5.x	0.255129	0.255129
protlength	u5A	-0.239243	0.239243
protlength	u5T	0.23863	0.23863
protlength	u5AC	-0.114803	0.114803
protlength	u5CT	0.150677	0.150677
protlength	u5TG	0.186292	0.186292
protlength	X5AUel	0.255314	0.255314
protlength	lcds	0.9905	0.9905
protlength	cdsT	0.26583	0.26583
protlength	cdsG	-0.257122	0.257122
protlength	cdsAT	0.273645	0.273645
protlength	cdsAG	-0.283772	0.283772
protlength	cdsAUel	0.999868	0.999868
protlength	lorf.x	0.975784	0.975784
protlength	nostems	0.97855	0.97855
protlength	relstems	-0.685953	0.685953
protlength	length	0.982712	0.982712
protlength	lu5.y	0.254112	0.254112
protlength	lorf.y	0.998005	0.998005
protlength	orfstems	-0.257418	0.257418
protlength	c5	0.25462	0.25462
protlength	co	0.988755	0.988755
protlength	orflength	0.983102	0.983102
protlength	score	0.540116	0.540116
protlength	energy	-0.979066	0.979066
protlength	CDS_SDV	-0.334177	0.334177
protlength	CDS_RELSTDEV	-0.154508	0.154508
protlength	CDS_LN	1	1
protlength	CDS_Q25	0.418675	0.418675
protlength	CDS_MEDIAN	-0.143067	0.143067
protlength	CDS_Q75	-0.173837	0.173837
protlength	CDS_FIRST10_AVG	-0.106394	0.106394
protlength	CDS_FIRST10_SDV	-0.214638	0.214638
protlength	CDS_LAST10_AVG	-0.113975	0.113975
protlength	CDS_LAST10_SDV	-0.135389	0.135389
protlength	X5UTR_AVG	-0.147315	0.147315
protlength	X5UTR_SDV	-0.219413	0.219413
protlength	X5UTR_RELSTDEV	0.110579	0.110579
protlength	X5UTR_LN	0.25374	0.25374
protlength	X5UTR_Q25	0.262411	0.262411
protlength	X5UTR_FIRST10_AVG	-0.148803	0.148803
protlength	X5UTR_FIRST10_SDV	-0.19654	0.19654
protlength	X5UTR_LAST10_AVG	-0.114574	0.114574
protlength	X5UTR_LAST10_SDV	-0.172753	0.172753
protlength	X3UTR_AVG	-0.106317	0.106317
protlength	X3UTR_SDV	-0.205849	0.205849
protlength	X3UTR_MIN	0.167921	0.167921
protlength	X3UTR_Q23	0.172274	0.172274
protlength	X3UTR_Q73	-0.184415	0.184415
protlength	X3UTR_MAX	-0.159886	0.159886
protlength	X3UTR_FIRST10_AVG	-0.110548	0.110548
protlength	X3UTR_FIRST10_SDV	-0.145742	0.145742
pH	kDa	-0.169708	0.169708
pH	K	0.364216	0.364216
pH	E	-0.457894	0.457894
pH	P	0.125199	0.125199
pH	H	0.129319	0.129319
pH	R	0.417364	0.417364
pH	N	-0.105026	0.105026
pH	D	-0.569514	0.569514
pH	ncont	0.479458	0.479458
pH	Number.of.introns	0.182551	0.182551
pH	First.intron.length	0.181276	0.181276
pH	First.intron.GC	0.183031	0.183031
pH	ORF.length..nt.	-0.141324	0.141324
pH	GO.0006412_PROTEIN_BIOSYNTHESIS	0.247243	0.247243
pH	nuc	-0.16526	0.16526
pH	vac	-0.132497	0.132497
pH	cyto	-0.128473	0.128473
pH	mito	0.296918	0.296918
pH	MOLECULAR.WEIGHT..in.Daltons.	-0.169695	0.169695
pH	PI	0.999999	0.999999
pH	PROTEIN.LENGTH	-0.17439	0.17439
pH	ALA	-0.152657	0.152657
pH	ASN	-0.182447	0.182447
pH	ASP	-0.385882	0.385882
pH	CYS	-0.148258	0.148258
pH	GLN	-0.16127	0.16127
pH	GLU	-0.360163	0.360163
pH	GLY	-0.140504	0.140504
pH	ILE	-0.150212	0.150212
pH	LEU	-0.137023	0.137023
pH	MET	-0.121792	0.121792
pH	PHE	-0.117421	0.117421
pH	PRO	-0.0976614	0.0976614
pH	SER	-0.16427	0.16427
pH	THR	-0.155432	0.155432
pH	TRP	-0.108102	0.108102
pH	TYR	-0.153691	0.153691
pH	VAL	-0.14373	0.14373
pH	lcds	-0.171535	0.171535
pH	cdsAT	-0.172379	0.172379
pH	cdsAG	0.110512	0.110512
pH	cdsCG	-0.112719	0.112719
pH	cdsTG	-0.217389	0.217389
pH	cdsAUel	-0.174827	0.174827
pH	lorf.x	-0.168189	0.168189
pH	nostems	-0.174502	0.174502
pH	relstems	0.116067	0.116067
pH	length	-0.170637	0.170637
pH	lorf.y	-0.174549	0.174549
pH	co	-0.179715	0.179715
pH	orflength	-0.171233	0.171233
pH	score	-0.146609	0.146609
pH	energy	0.175768	0.175768
pH	CDS_RELSTDEV	0.0971083	0.0971083
pH	CDS_LN	-0.174405	0.174405
kDa	L	0.102644	0.102644
kDa	F	0.164449	0.164449
kDa	W	0.143846	0.143846
kDa	K	-0.194165	0.194165
kDa	S	0.211761	0.211761
kDa	P	0.123874	0.123874
kDa	V	-0.0965301	0.0965301
kDa	I	0.150097	0.150097
kDa	Y	0.0949668	0.0949668
kDa	H	0.0961332	0.0961332
kDa	R	-0.118277	0.118277
kDa	N	0.219399	0.219399
kDa	D	0.133739	0.133739
kDa	T	0.103362	0.103362
kDa	ncont	-0.102509	0.102509
kDa	Number.of.introns	-0.266679	0.266679
kDa	First.intron.length	-0.265455	0.265455
kDa	First.intron.GC	-0.266473	0.266473
kDa	Ribosome.occupancy	-0.48988	0.48988
kDa	Ribosome.density..rb.kb.	-0.561627	0.561627
kDa	ORF.length..nt.	0.900253	0.900253
kDa	mRNA.level	-0.262535	0.262535
kDa	GO.0006412_PROTEIN_BIOSYNTHESIS	-0.186384	0.186384
kDa	GO.0008150_BIOLOGICAL_PROCESS	-0.105975	0.105975
kDa	mito	-0.109036	0.109036
kDa	er	0.109428	0.109428
kDa	MOLECULAR.WEIGHT..in.Daltons.	1	1
kDa	PI	-0.169738	0.169738
kDa	PROTEIN.LENGTH	0.999072	0.999072
kDa	ALA	0.848001	0.848001
kDa	ARG	0.818109	0.818109
kDa	ASN	0.906332	0.906332
kDa	ASP	0.891869	0.891869
kDa	CYS	0.639221	0.639221
kDa	GLN	0.841122	0.841122
kDa	GLU	0.865124	0.865124
kDa	GLY	0.849186	0.849186
kDa	HIS	0.804626	0.804626
kDa	ILE	0.91861	0.91861
kDa	LEU	0.93312	0.93312
kDa	LYS	0.852812	0.852812
kDa	MET	0.818976	0.818976
kDa	PHE	0.875205	0.875205
kDa	PRO	0.89466	0.89466
kDa	SER	0.910457	0.910457
kDa	THR	0.912768	0.912768
kDa	TRP	0.67299	0.67299
kDa	TYR	0.859086	0.859086
kDa	VAL	0.896371	0.896371
kDa	AROMATICITY.SCORE..Frequency.of.aromatic.amino.acids..Phe..Tyr..Trp.	0.136275	0.136275
kDa	lu5.x	0.252917	0.252917
kDa	u5A	-0.242459	0.242459
kDa	u5T	0.23852	0.23852
kDa	u5AC	-0.11775	0.11775
kDa	u5CT	0.148438	0.148438
kDa	u5TG	0.191695	0.191695
kDa	X5AUel	0.253115	0.253115
kDa	lcds	0.989589	0.989589
kDa	cdsT	0.266474	0.266474
kDa	cdsG	-0.264406	0.264406
kDa	cdsAT	0.288105	0.288105
kDa	cdsAG	-0.277637	0.277637
kDa	cdsAUel	0.998866	0.998866
kDa	lorf.x	0.97438	0.97438
kDa	nostems	0.976886	0.976886
kDa	relstems	-0.685786	0.685786
kDa	length	0.981292	0.981292
kDa	lu5.y	0.251927	0.251927
kDa	lorf.y	0.997048	0.997048
kDa	orfstems	-0.260604	0.260604
kDa	c5	0.253814	0.253814
kDa	co	0.9873	0.9873
kDa	orflength	0.981656	0.981656
kDa	score	0.53178	0.53178
kDa	energy	-0.976116	0.976116
kDa	CDS_SDV	-0.345216	0.345216
kDa	CDS_RELSTDEV	-0.143146	0.143146
kDa	CDS_LN	0.999072	0.999072
kDa	CDS_Q25	0.423285	0.423285
kDa	CDS_MEDIAN	-0.155026	0.155026
kDa	CDS_Q75	-0.186784	0.186784
kDa	CDS_FIRST10_AVG	-0.1104	0.1104
kDa	CDS_FIRST10_SDV	-0.220611	0.220611
kDa	CDS_LAST10_AVG	-0.118169	0.118169
kDa	CDS_LAST10_SDV	-0.141168	0.141168
kDa	X5UTR_AVG	-0.149807	0.149807
kDa	X5UTR_SDV	-0.226611	0.226611
kDa	X5UTR_RELSTDEV	0.111068	0.111068
kDa	X5UTR_LN	0.251544	0.251544
kDa	X5UTR_Q25	0.267012	0.267012
kDa	X5UTR_FIRST10_AVG	-0.152502	0.152502
kDa	X5UTR_FIRST10_SDV	-0.201659	0.201659
kDa	X5UTR_LAST10_AVG	-0.116719	0.116719
kDa	X5UTR_LAST10_SDV	-0.178583	0.178583
kDa	X3UTR_AVG	-0.109868	0.109868
kDa	X3UTR_SDV	-0.211379	0.211379
kDa	X3UTR_MIN	0.171468	0.171468
kDa	X3UTR_Q23	0.174382	0.174382
kDa	X3UTR_Q73	-0.192165	0.192165
kDa	X3UTR_MAX	-0.165408	0.165408
kDa	X3UTR_FIRST10_AVG	-0.115309	0.115309
kDa	X3UTR_FIRST10_SDV	-0.150235	0.150235
G	A	0.250065	0.250065
G	L	-0.232603	0.232603
G	K	-0.114282	0.114282
G	Q	-0.198622	0.198622
G	E	-0.175538	0.175538
G	S	-0.201772	0.201772
G	V	0.254123	0.254123
G	N	-0.243095	0.243095
G	D	-0.112797	0.112797
G	ncont	-0.207058	0.207058
G	Ribosome.occupancy	0.183025	0.183025
G	Ribosome.density..rb.kb.	0.156198	0.156198
G	mRNA.level	0.286716	0.286716
G	GO.0006350_TRANSCRIPTION	-0.110995	0.110995
G	CAI..Codon.Adaptation.Index.	0.204858	0.204858
G	CODON.BIAS	0.284056	0.284056
G	ALA	0.0967312	0.0967312
G	ASN	-0.126491	0.126491
G	GLN	-0.128986	0.128986
G	GLU	-0.11428	0.11428
G	GLY	0.43633	0.43633
G	LEU	-0.10841	0.10841
G	LYS	-0.103494	0.103494
G	SER	-0.110449	0.110449
G	FOP.SCORE..Frequency.of.Optimal.Codons.	0.249933	0.249933
G	GRAVY.SCORE..Hydropathicity.of.Protein.	0.207776	0.207776
G	u5A	0.111482	0.111482
G	u5G	-0.101307	0.101307
G	u5TG	-0.116753	0.116753
G	cdsA	-0.399023	0.399023
G	cdsG	0.493707	0.493707
G	cdsAC	-0.13596	0.13596
G	cdsAT	-0.230529	0.230529
G	cdsCG	0.123615	0.123615
G	cdsTG	0.395226	0.395226
G	relnostems	0.144421	0.144421
G	orfstems	0.122709	0.122709
G	CDS_AVG	0.196403	0.196403
G	CDS_SDV	0.309901	0.309901
G	CDS_MIN	-0.222955	0.222955
G	CDS_Q25	-0.230901	0.230901
G	CDS_MEDIAN	0.254322	0.254322
G	CDS_Q75	0.274747	0.274747
G	CDS_MAX	0.248926	0.248926
G	CDS_FIRST10_SDV	0.179281	0.179281
G	CDS_LAST10_SDV	0.140409	0.140409
G	X5UTR_SDV	0.184532	0.184532
G	X5UTR_MIN	-0.166186	0.166186
G	X5UTR_Q25	-0.15503	0.15503
G	X5UTR_Q75	0.106334	0.106334
G	X5UTR_MAX	0.134763	0.134763
G	X5UTR_FIRST10_SDV	0.11083	0.11083
G	X5UTR_LAST10_SDV	0.178162	0.178162
G	X3UTR_AVG	0.100925	0.100925
G	X3UTR_SDV	0.161787	0.161787
G	X3UTR_MIN	-0.11409	0.11409
G	X3UTR_Q23	-0.0985173	0.0985173
G	X3UTR_Q73	0.171085	0.171085
G	X3UTR_MAX	0.141084	0.141084
G	X3UTR_FIRST10_AVG	0.128605	0.128605
G	X3UTR_FIRST10_SDV	0.144776	0.144776
A	L	-0.234275	0.234275
A	F	-0.193092	0.193092
A	W	-0.132246	0.132246
A	Q	-0.0995665	0.0995665
A	S	-0.168635	0.168635
A	V	0.201583	0.201583
A	I	-0.165501	0.165501
A	C	-0.181175	0.181175
A	Y	-0.146467	0.146467
A	H	-0.194845	0.194845
A	N	-0.287321	0.287321
A	D	-0.17328	0.17328
A	ncont	-0.174523	0.174523
A	scont	-0.160649	0.160649
A	Number.of.introns	0.12719	0.12719
A	First.intron.length	0.126151	0.126151
A	First.intron.GC	0.127738	0.127738
A	Ribosome.occupancy	0.225549	0.225549
A	Ribosome.density..rb.kb.	0.179723	0.179723
A	mRNA.level	0.379225	0.379225
A	GO.0006412_PROTEIN_BIOSYNTHESIS	0.123043	0.123043
A	CAI..Codon.Adaptation.Index.	0.39345	0.39345
A	CODON.BIAS	0.473204	0.473204
A	ALA	0.414844	0.414844
A	ASN	-0.163233	0.163233
A	ASP	-0.117378	0.117378
A	CYS	-0.159664	0.159664
A	GLN	-0.0990264	0.0990264
A	HIS	-0.156978	0.156978
A	ILE	-0.108056	0.108056
A	LEU	-0.131371	0.131371
A	PHE	-0.139463	0.139463
A	SER	-0.102542	0.102542
A	TRP	-0.136147	0.136147
A	TYR	-0.128505	0.128505
A	FOP.SCORE..Frequency.of.Optimal.Codons.	0.430677	0.430677
A	GRAVY.SCORE..Hydropathicity.of.Protein.	0.175378	0.175378
A	AROMATICITY.SCORE..Frequency.of.aromatic.amino.acids..Phe..Tyr..Trp.	-0.219491	0.219491
A	u3T	0.108004	0.108004
A	u3G	-0.113733	0.113733
A	u5A	0.138593	0.138593
A	u5G	-0.170322	0.170322
A	u5AC	0.116918	0.116918
A	u5TG	-0.139228	0.139228
A	cdsA	-0.355448	0.355448
A	cdsC	0.29784	0.29784
A	cdsG	0.294491	0.294491
A	cdsAT	-0.455911	0.455911
A	cdsCT	0.331291	0.331291
A	cdsCG	0.117861	0.117861
A	cdsTG	0.285135	0.285135
A	relnostems	0.113287	0.113287
A	orfstems	0.162468	0.162468
A	score	0.120892	0.120892
A	CDS_AVG	0.390764	0.390764
A	CDS_SDV	0.434869	0.434869
A	CDS_RELSTDEV	-0.260783	0.260783
A	CDS_MIN	-0.29862	0.29862
A	CDS_Q25	-0.285551	0.285551
A	CDS_MEDIAN	0.398986	0.398986
A	CDS_Q75	0.440626	0.440626
A	CDS_MAX	0.378914	0.378914
A	CDS_FIRST10_AVG	0.18459	0.18459
A	CDS_FIRST10_SDV	0.276076	0.276076
A	CDS_LAST10_AVG	0.136374	0.136374
A	CDS_LAST10_SDV	0.202207	0.202207
A	X5UTR_AVG	0.133723	0.133723
A	X5UTR_SDV	0.284891	0.284891
A	X5UTR_MIN	-0.229552	0.229552
A	X5UTR_Q25	-0.205318	0.205318
A	X5UTR_Q75	0.198129	0.198129
A	X5UTR_MAX	0.228742	0.228742
A	X5UTR_FIRST10_AVG	0.147716	0.147716
A	X5UTR_FIRST10_SDV	0.202495	0.202495
A	X5UTR_LAST10_AVG	0.145186	0.145186
A	X5UTR_LAST10_SDV	0.249328	0.249328
A	X3UTR_AVG	0.129112	0.129112
A	X3UTR_SDV	0.240601	0.240601
A	X3UTR_MIN	-0.162459	0.162459
A	X3UTR_Q23	-0.143457	0.143457
A	X3UTR_Q73	0.253717	0.253717
A	X3UTR_MAX	0.224285	0.224285
A	X3UTR_FIRST10_AVG	0.165045	0.165045
A	X3UTR_FIRST10_SDV	0.190741	0.190741
L	F	0.220717	0.220717
L	W	0.132106	0.132106
L	K	-0.152292	0.152292
L	P	-0.150037	0.150037
L	I	0.268146	0.268146
L	C	0.118313	0.118313
L	Y	0.129264	0.129264
L	ncont	-0.174067	0.174067
L	Number.of.introns	-0.0936523	0.0936523
L	First.intron.GC	-0.0958945	0.0958945
L	Ribosome.occupancy	-0.136013	0.136013
L	Ribosome.density..rb.kb.	-0.13354	0.13354
L	mRNA.level	-0.220656	0.220656
L	GO.0006412_PROTEIN_BIOSYNTHESIS	-0.143626	0.143626
L	nuc	-0.107874	0.107874
L	cyto	-0.179682	0.179682
L	er	0.144357	0.144357
L	MOLECULAR.WEIGHT..in.Daltons.	0.102651	0.102651
L	CAI..Codon.Adaptation.Index.	-0.280264	0.280264
L	CODON.BIAS	-0.253906	0.253906
L	CYS	0.153581	0.153581
L	ILE	0.187111	0.187111
L	LEU	0.414707	0.414707
L	MET	0.116512	0.116512
L	PHE	0.196421	0.196421
L	TRP	0.171531	0.171531
L	TYR	0.154426	0.154426
L	FOP.SCORE..Frequency.of.Optimal.Codons.	-0.283666	0.283666
L	GRAVY.SCORE..Hydropathicity.of.Protein.	0.432339	0.432339
L	AROMATICITY.SCORE..Frequency.of.aromatic.amino.acids..Phe..Tyr..Trp.	0.218017	0.218017
L	u3T	-0.106871	0.106871
L	u3AG	0.0970694	0.0970694
L	u5G	0.131185	0.131185
L	u5TG	0.114472	0.114472
L	cdsA	-0.0992207	0.0992207
L	cdsC	-0.178832	0.178832
L	cdsT	0.381738	0.381738
L	cdsG	-0.226427	0.226427
L	cdsAC	-0.125002	0.125002
L	cdsAT	0.287761	0.287761
L	cdsAG	-0.219486	0.219486
L	cdsCT	0.154346	0.154346
L	cdsCG	-0.161315	0.161315
L	orfstems	-0.106734	0.106734
L	CDS_AVG	-0.169929	0.169929
L	CDS_SDV	-0.184688	0.184688
L	CDS_RELSTDEV	0.130612	0.130612
L	CDS_Q25	0.16654	0.16654
L	CDS_MEDIAN	-0.192742	0.192742
L	CDS_Q75	-0.21448	0.21448
L	CDS_MAX	-0.157524	0.157524
L	CDS_FIRST10_SDV	-0.102173	0.102173
L	CDS_LAST10_AVG	-0.102204	0.102204
L	X5UTR_Q25	0.0977847	0.0977847
L	X3UTR_SDV	-0.111039	0.111039
L	X3UTR_Q73	-0.139976	0.139976
L	X3UTR_MAX	-0.119895	0.119895
L	X3UTR_FIRST10_AVG	-0.0936569	0.0936569
L	X3UTR_FIRST10_SDV	-0.115285	0.115285
M	K	-0.184205	0.184205
M	E	-0.109807	0.109807
M	C	0.12391	0.12391
M	scont	0.737188	0.737188
M	Number.of.introns	-0.112181	0.112181
M	First.intron.length	-0.112551	0.112551
M	First.intron.GC	-0.112645	0.112645
M	CAI..Codon.Adaptation.Index.	-0.167873	0.167873
M	CODON.BIAS	-0.123108	0.123108
M	GLU	-0.0992814	0.0992814
M	LYS	-0.146977	0.146977
M	MET	0.493602	0.493602
M	FOP.SCORE..Frequency.of.Optimal.Codons.	-0.137376	0.137376
M	GRAVY.SCORE..Hydropathicity.of.Protein.	0.174496	0.174496
M	AROMATICITY.SCORE..Frequency.of.aromatic.amino.acids..Phe..Tyr..Trp.	0.0969334	0.0969334
M	cdsA	-0.0943193	0.0943193
M	cdsG	0.0940924	0.0940924
M	cdsAT	0.21273	0.21273
M	cdsAG	-0.122901	0.122901
M	cdsTG	0.195381	0.195381
F	W	0.322506	0.322506
F	K	-0.209507	0.209507
F	Q	-0.178737	0.178737
F	E	-0.2046	0.2046
F	I	0.233219	0.233219
F	C	0.16039	0.16039
F	Y	0.301494	0.301494
F	R	-0.208132	0.208132
F	D	-0.1232	0.1232
F	ncont	-0.281081	0.281081
F	scont	0.127302	0.127302
F	Ribosome.density..rb.kb.	-0.0996185	0.0996185
F	ORF.length..nt.	0.132658	0.132658
F	mRNA.level	-0.117716	0.117716
F	GO.0006350_TRANSCRIPTION	-0.146887	0.146887
F	GO.0006412_PROTEIN_BIOSYNTHESIS	-0.121028	0.121028
F	GO.0006810_TRANSPORT	0.140275	0.140275
F	nuc	-0.192652	0.192652
F	vac	0.155872	0.155872
F	cyto	-0.117614	0.117614
F	er	0.245022	0.245022
F	MOLECULAR.WEIGHT..in.Daltons.	0.164445	0.164445
F	CAI..Codon.Adaptation.Index.	-0.119532	0.119532
F	PROTEIN.LENGTH	0.151124	0.151124
F	CODON.BIAS	-0.175133	0.175133
F	ASN	0.130951	0.130951
F	CYS	0.207773	0.207773
F	GLY	0.117025	0.117025
F	HIS	0.127971	0.127971
F	ILE	0.217124	0.217124
F	LEU	0.223999	0.223999
F	MET	0.167661	0.167661
F	PHE	0.58428	0.58428
F	PRO	0.126019	0.126019
F	SER	0.110481	0.110481
F	THR	0.106969	0.106969
F	TRP	0.33017	0.33017
F	TYR	0.277339	0.277339
F	VAL	0.130394	0.130394
F	FOP.SCORE..Frequency.of.Optimal.Codons.	-0.158035	0.158035
F	GRAVY.SCORE..Hydropathicity.of.Protein.	0.397836	0.397836
F	AROMATICITY.SCORE..Frequency.of.aromatic.amino.acids..Phe..Tyr..Trp.	0.804008	0.804008
F	u5G	0.0976457	0.0976457
F	u5TG	0.102681	0.102681
F	lcds	0.150828	0.150828
F	cdsA	-0.280229	0.280229
F	cdsC	-0.119805	0.119805
F	cdsT	0.564914	0.564914
F	cdsG	-0.276113	0.276113
F	cdsAC	-0.206552	0.206552
F	cdsAT	0.300118	0.300118
F	cdsAG	-0.413939	0.413939
F	cdsCT	0.105517	0.105517
F	cdsCG	-0.122251	0.122251
F	cdsAUel	0.149244	0.149244
F	lorf.x	0.148686	0.148686
F	nostems	0.134511	0.134511
F	relstems	-0.105544	0.105544
F	length	0.147835	0.147835
F	lorf.y	0.149071	0.149071
F	relnostems	-0.108238	0.108238
F	orfstems	-0.148524	0.148524
F	co	0.134332	0.134332
F	orflength	0.147018	0.147018
F	energy	-0.137911	0.137911
F	CDS_LN	0.15113	0.15113
W	K	-0.196181	0.196181
W	Q	-0.158741	0.158741
W	E	-0.146677	0.146677
W	I	0.0974849	0.0974849
W	C	0.201182	0.201182
W	Y	0.319279	0.319279
W	H	0.156163	0.156163
W	R	-0.106589	0.106589
W	ncont	-0.100102	0.100102
W	scont	0.149806	0.149806
W	Ribosome.occupancy	-0.102207	0.102207
W	ORF.length..nt.	0.111348	0.111348
W	mRNA.level	-0.109152	0.109152
W	GO.0006350_TRANSCRIPTION	-0.0988776	0.0988776
W	vac	0.149918	0.149918
W	er	0.138505	0.138505
W	MOLECULAR.WEIGHT..in.Daltons.	0.143839	0.143839
W	CAI..Codon.Adaptation.Index.	-0.1236	0.1236
W	PROTEIN.LENGTH	0.131272	0.131272
W	CODON.BIAS	-0.12847	0.12847
W	CYS	0.224499	0.224499
W	GLY	0.116402	0.116402
W	HIS	0.190268	0.190268
W	ILE	0.152646	0.152646
W	LEU	0.177958	0.177958
W	MET	0.14237	0.14237
W	PHE	0.259382	0.259382
W	PRO	0.11843	0.11843
W	THR	0.110995	0.110995
W	TRP	0.782451	0.782451
W	TYR	0.273377	0.273377
W	VAL	0.134101	0.134101
W	FOP.SCORE..Frequency.of.Optimal.Codons.	-0.127493	0.127493
W	GRAVY.SCORE..Hydropathicity.of.Protein.	0.209751	0.209751
W	AROMATICITY.SCORE..Frequency.of.aromatic.amino.acids..Phe..Tyr..Trp.	0.591799	0.591799
W	lcds	0.12883	0.12883
W	cdsA	-0.242034	0.242034
W	cdsT	0.274538	0.274538
W	cdsAT	0.175298	0.175298
W	cdsAG	-0.302979	0.302979
W	cdsCT	0.0939219	0.0939219
W	cdsTG	0.195361	0.195361
W	cdsAUel	0.130949	0.130949
W	lorf.x	0.126475	0.126475
W	nostems	0.125741	0.125741
W	length	0.128099	0.128099
W	lorf.y	0.129587	0.129587
W	co	0.125697	0.125697
W	orflength	0.127423	0.127423
W	energy	-0.144906	0.144906
W	CDS_LN	0.13128	0.13128
W	CDS_Q25	0.108027	0.108027
W	X5UTR_SDV	-0.0961948	0.0961948
K	E	0.301266	0.301266
K	S	-0.25537	0.25537
K	I	-0.169636	0.169636
K	C	-0.191717	0.191717
K	Y	-0.190653	0.190653
K	R	0.135033	0.135033
K	D	0.101743	0.101743
K	T	-0.191943	0.191943
K	ncont	0.354612	0.354612
K	scont	-0.221359	0.221359
K	Number.of.introns	0.155586	0.155586
K	First.intron.length	0.155928	0.155928
K	First.intron.GC	0.154825	0.154825
K	Ribosome.occupancy	0.172486	0.172486
K	Ribosome.density..rb.kb.	0.124394	0.124394
K	ORF.length..nt.	-0.171695	0.171695
K	mRNA.level	0.154827	0.154827
K	GO.0006412_PROTEIN_BIOSYNTHESIS	0.295409	0.295409
K	GO.0006810_TRANSPORT	-0.0947211	0.0947211
K	vac	-0.247082	0.247082
K	mito	0.133975	0.133975
K	er	-0.246881	0.246881
K	MOLECULAR.WEIGHT..in.Daltons.	-0.194153	0.194153
K	PI	0.364203	0.364203
K	CAI..Codon.Adaptation.Index.	0.257005	0.257005
K	PROTEIN.LENGTH	-0.202707	0.202707
K	CODON.BIAS	0.158182	0.158182
K	ALA	-0.198672	0.198672
K	ASN	-0.19811	0.19811
K	ASP	-0.0977637	0.0977637
K	CYS	-0.256277	0.256277
K	GLN	-0.174191	0.174191
K	GLY	-0.238408	0.238408
K	HIS	-0.176459	0.176459
K	ILE	-0.228919	0.228919
K	LEU	-0.226227	0.226227
K	LYS	0.292035	0.292035
K	MET	-0.262482	0.262482
K	PHE	-0.258102	0.258102
K	PRO	-0.197149	0.197149
K	SER	-0.270435	0.270435
K	THR	-0.262163	0.262163
K	TRP	-0.252957	0.252957
K	TYR	-0.267741	0.267741
K	VAL	-0.198646	0.198646
K	FOP.SCORE..Frequency.of.Optimal.Codons.	0.188157	0.188157
K	GRAVY.SCORE..Hydropathicity.of.Protein.	-0.455944	0.455944
K	AROMATICITY.SCORE..Frequency.of.aromatic.amino.acids..Phe..Tyr..Trp.	-0.271286	0.271286
K	lu5.x	-0.169172	0.169172
K	u5A	0.128462	0.128462
K	u5T	-0.111126	0.111126
K	u5CT	-0.10548	0.10548
K	X5AUel	-0.168939	0.168939
K	lcds	-0.199121	0.199121
K	cdsA	0.548601	0.548601
K	cdsC	-0.283814	0.283814
K	cdsT	-0.383163	0.383163
K	cdsG	0.111552	0.111552
K	cdsAC	-0.129946	0.129946
K	cdsAT	-0.210629	0.210629
K	cdsAG	0.521059	0.521059
K	cdsCT	-0.259337	0.259337
K	cdsCG	-0.225985	0.225985
K	cdsTG	-0.178799	0.178799
K	cdsAUel	-0.202756	0.202756
K	lorf.x	-0.214474	0.214474
K	nostems	-0.211652	0.211652
K	relstems	0.146242	0.146242
K	length	-0.217762	0.217762
K	lu5.y	-0.171	0.171
K	lorf.y	-0.201166	0.201166
K	c5	-0.150829	0.150829
K	co	-0.194038	0.194038
K	orflength	-0.217149	0.217149
K	score	-0.187058	0.187058
K	energy	0.237117	0.237117
K	CDS_AVG	-0.115314	0.115314
K	CDS_RELSTDEV	0.140467	0.140467
K	CDS_LN	-0.202722	0.202722
K	CDS_Q25	-0.169566	0.169566
K	X5UTR_LN	-0.170489	0.170489
K	X5UTR_Q25	-0.100089	0.100089
Q	V	-0.220354	0.220354
Q	I	-0.186238	0.186238
Q	C	-0.13658	0.13658
Q	Y	-0.121375	0.121375
Q	R	0.0951822	0.0951822
Q	N	0.146648	0.146648
Q	ncont	0.313268	0.313268
Q	GO.0006350_TRANSCRIPTION	0.0990933	0.0990933
Q	CAI..Codon.Adaptation.Index.	-0.100673	0.100673
Q	CYS	-0.122136	0.122136
Q	GLN	0.469566	0.469566
Q	GLY	-0.118624	0.118624
Q	ILE	-0.0950814	0.0950814
Q	PHE	-0.0989957	0.0989957
Q	TRP	-0.129186	0.129186
Q	VAL	-0.115453	0.115453
Q	GRAVY.SCORE..Hydropathicity.of.Protein.	-0.349368	0.349368
Q	AROMATICITY.SCORE..Frequency.of.aromatic.amino.acids..Phe..Tyr..Trp.	-0.193585	0.193585
Q	cdsA	0.304104	0.304104
Q	cdsC	0.1074	0.1074
Q	cdsT	-0.331518	0.331518
Q	cdsG	-0.0962602	0.0962602
Q	cdsAC	0.212046	0.212046
Q	cdsAG	0.198411	0.198411
Q	cdsCT	-0.150173	0.150173
Q	cdsTG	-0.276284	0.276284
Q	CDS_SDV	-0.101124	0.101124
Q	CDS_MIN	0.115887	0.115887
Q	CDS_MAX	-0.100719	0.100719
Q	X5UTR_MIN	0.0934739	0.0934739
E	S	-0.247635	0.247635
E	V	-0.0963166	0.0963166
E	I	-0.107525	0.107525
E	C	-0.14114	0.14114
E	Y	-0.178212	0.178212
E	D	0.382848	0.382848
E	T	-0.229537	0.229537
E	ncont	0.104292	0.104292
E	scont	-0.175653	0.175653
E	Ribosome.occupancy	0.129865	0.129865
E	nuc	0.228162	0.228162
E	vac	-0.121941	0.121941
E	cyto	0.15171	0.15171
E	er	-0.237653	0.237653
E	PI	-0.457887	0.457887
E	CAI..Codon.Adaptation.Index.	0.139587	0.139587
E	ARG	0.0938451	0.0938451
E	ASP	0.207855	0.207855
E	GLU	0.492059	0.492059
E	LYS	0.206031	0.206031
E	GRAVY.SCORE..Hydropathicity.of.Protein.	-0.41849	0.41849
E	AROMATICITY.SCORE..Frequency.of.aromatic.amino.acids..Phe..Tyr..Trp.	-0.24642	0.24642
E	cdsA	0.454264	0.454264
E	cdsC	-0.333805	0.333805
E	cdsT	-0.345658	0.345658
E	cdsG	0.259781	0.259781
E	cdsAG	0.489837	0.489837
E	cdsCT	-0.323626	0.323626
E	relnostems	0.126822	0.126822
E	CDS_AVG	-0.106248	0.106248
E	CDS_RELSTDEV	0.0974056	0.0974056
S	V	-0.221145	0.221145
S	R	-0.175123	0.175123
S	N	0.241118	0.241118
S	D	-0.100594	0.100594
S	T	0.147162	0.147162
S	ncont	-0.147735	0.147735
S	Number.of.introns	-0.113378	0.113378
S	First.intron.length	-0.111833	0.111833
S	First.intron.GC	-0.113643	0.113643
S	Ribosome.occupancy	-0.301609	0.301609
S	Ribosome.density..rb.kb.	-0.273919	0.273919
S	ORF.length..nt.	0.200667	0.200667
S	mRNA.level	-0.291688	0.291688
S	GO.0006412_PROTEIN_BIOSYNTHESIS	-0.14889	0.14889
S	cyto	-0.124527	0.124527
S	er	0.112106	0.112106
S	MOLECULAR.WEIGHT..in.Daltons.	0.211762	0.211762
S	CAI..Codon.Adaptation.Index.	-0.321072	0.321072
S	PROTEIN.LENGTH	0.221595	0.221595
S	CODON.BIAS	-0.295858	0.295858
S	ALA	0.126073	0.126073
S	ASN	0.278406	0.278406
S	ASP	0.139044	0.139044
S	CYS	0.109692	0.109692
S	GLN	0.199699	0.199699
S	HIS	0.109459	0.109459
S	ILE	0.161165	0.161165
S	LEU	0.188764	0.188764
S	MET	0.128556	0.128556
S	PHE	0.164591	0.164591
S	PRO	0.173784	0.173784
S	SER	0.559133	0.559133
S	THR	0.258906	0.258906
S	TRP	0.108664	0.108664
S	TYR	0.139215	0.139215
S	VAL	0.109721	0.109721
S	FOP.SCORE..Frequency.of.Optimal.Codons.	-0.314384	0.314384
S	lu5.x	0.128018	0.128018
S	u5A	-0.148816	0.148816
S	u5T	0.103536	0.103536
S	u5TG	0.115864	0.115864
S	X5AUel	0.128104	0.128104
S	lcds	0.218916	0.218916
S	cdsC	0.187652	0.187652
S	cdsT	0.133627	0.133627
S	cdsG	-0.345697	0.345697
S	cdsAT	0.150725	0.150725
S	cdsAG	-0.179824	0.179824
S	cdsCT	0.202385	0.202385
S	cdsTG	-0.290897	0.290897
S	cdsAUel	0.221524	0.221524
S	lorf.x	0.230752	0.230752
S	nostems	0.219797	0.219797
S	relstems	-0.178588	0.178588
S	length	0.233532	0.233532
S	lu5.y	0.12778	0.12778
S	lorf.y	0.221859	0.221859
S	relnostems	-0.118689	0.118689
S	orfstems	-0.149361	0.149361
S	c5	0.109039	0.109039
S	co	0.209388	0.209388
S	orflength	0.233591	0.233591
S	score	0.129812	0.129812
S	energy	-0.207328	0.207328
S	CDS_SDV	-0.305372	0.305372
S	CDS_LN	0.221593	0.221593
S	CDS_MIN	0.203233	0.203233
S	CDS_Q25	0.321831	0.321831
S	CDS_MEDIAN	-0.190233	0.190233
S	CDS_Q75	-0.214099	0.214099
S	CDS_MAX	-0.166355	0.166355
S	CDS_FIRST10_AVG	-0.128914	0.128914
S	CDS_FIRST10_SDV	-0.204285	0.204285
S	CDS_LAST10_SDV	-0.0964657	0.0964657
S	X5UTR_AVG	-0.105849	0.105849
S	X5UTR_SDV	-0.193826	0.193826
S	X5UTR_LN	0.127753	0.127753
S	X5UTR_MIN	0.114626	0.114626
S	X5UTR_Q25	0.177016	0.177016
S	X5UTR_Q75	-0.0980795	0.0980795
S	X5UTR_FIRST10_AVG	-0.100537	0.100537
S	X5UTR_FIRST10_SDV	-0.152331	0.152331
S	X5UTR_LAST10_SDV	-0.177632	0.177632
S	X3UTR_AVG	-0.098803	0.098803
S	X3UTR_SDV	-0.149099	0.149099
S	X3UTR_MIN	0.116598	0.116598
S	X3UTR_Q23	0.15351	0.15351
S	X3UTR_Q73	-0.116402	0.116402
S	X3UTR_MAX	-0.110035	0.110035
S	X3UTR_FIRST10_SDV	-0.132387	0.132387
P	V	-0.117425	0.117425
P	I	-0.133009	0.133009
P	H	0.164899	0.164899
P	ORF.length..nt.	0.119615	0.119615
P	mRNA.level	-0.136383	0.136383
P	mito	0.124171	0.124171
P	MOLECULAR.WEIGHT..in.Daltons.	0.123876	0.123876
P	PI	0.125198	0.125198
P	CAI..Codon.Adaptation.Index.	-0.109546	0.109546
P	PROTEIN.LENGTH	0.123467	0.123467
P	ARG	0.141191	0.141191
P	ASN	0.119015	0.119015
P	GLN	0.116676	0.116676
P	GLY	0.0999354	0.0999354
P	HIS	0.181081	0.181081
P	MET	0.127698	0.127698
P	PHE	0.0931627	0.0931627
P	PRO	0.514744	0.514744
P	THR	0.113814	0.113814
P	TYR	0.097952	0.097952
P	GRAVY.SCORE..Hydropathicity.of.Protein.	-0.147308	0.147308
P	lcds	0.121863	0.121863
P	cdsC	0.366109	0.366109
P	cdsT	-0.1512	0.1512
P	cdsG	-0.118718	0.118718
P	cdsAC	0.157486	0.157486
P	cdsTG	-0.166062	0.166062
P	cdsAUel	0.123746	0.123746
P	lorf.x	0.125143	0.125143
P	nostems	0.121082	0.121082
P	relstems	-0.102356	0.102356
P	length	0.12746	0.12746
P	lorf.y	0.124798	0.124798
P	co	0.117784	0.117784
P	orflength	0.127933	0.127933
P	energy	-0.129235	0.129235
P	CDS_LN	0.123466	0.123466
V	I	0.101333	0.101333
V	N	-0.279499	0.279499
V	D	-0.122651	0.122651
V	ncont	-0.211176	0.211176
V	Number.of.introns	0.100584	0.100584
V	First.intron.length	0.0993795	0.0993795
V	First.intron.GC	0.102199	0.102199
V	Ribosome.occupancy	0.16679	0.16679
V	Ribosome.density..rb.kb.	0.131651	0.131651
V	ORF.length..nt.	-0.0945537	0.0945537
V	mRNA.level	0.268731	0.268731
V	GO.0006350_TRANSCRIPTION	-0.102317	0.102317
V	GO.0006412_PROTEIN_BIOSYNTHESIS	0.125255	0.125255
V	MOLECULAR.WEIGHT..in.Daltons.	-0.0965412	0.0965412
V	CAI..Codon.Adaptation.Index.	0.230009	0.230009
V	CODON.BIAS	0.264695	0.264695
V	ASN	-0.184302	0.184302
V	ASP	-0.13039	0.13039
V	GLN	-0.194232	0.194232
V	GLU	-0.122371	0.122371
V	LYS	-0.100867	0.100867
V	PRO	-0.123314	0.123314
V	SER	-0.159372	0.159372
V	VAL	0.307453	0.307453
V	FOP.SCORE..Frequency.of.Optimal.Codons.	0.273569	0.273569
V	GRAVY.SCORE..Hydropathicity.of.Protein.	0.437277	0.437277
V	u5A	0.132371	0.132371
V	u5TG	-0.101061	0.101061
V	cdsA	-0.370495	0.370495
V	cdsT	0.218499	0.218499
V	cdsG	0.272258	0.272258
V	cdsAC	-0.159974	0.159974
V	cdsAT	-0.195125	0.195125
V	cdsTG	0.397011	0.397011
V	lorf.x	-0.101361	0.101361
V	length	-0.100641	0.100641
V	relnostems	0.118889	0.118889
V	orfstems	0.119234	0.119234
V	orflength	-0.100906	0.100906
V	CDS_AVG	0.183769	0.183769
V	CDS_SDV	0.301813	0.301813
V	CDS_MIN	-0.23378	0.23378
V	CDS_Q25	-0.234732	0.234732
V	CDS_MEDIAN	0.259246	0.259246
V	CDS_Q75	0.267667	0.267667
V	CDS_MAX	0.221979	0.221979
V	CDS_FIRST10_SDV	0.173065	0.173065
V	CDS_LAST10_SDV	0.12532	0.12532
V	X5UTR_AVG	0.109441	0.109441
V	X5UTR_SDV	0.204562	0.204562
V	X5UTR_MIN	-0.153128	0.153128
V	X5UTR_Q25	-0.181881	0.181881
V	X5UTR_Q75	0.101587	0.101587
V	X5UTR_MAX	0.115009	0.115009
V	X5UTR_FIRST10_SDV	0.136565	0.136565
V	X5UTR_LAST10_SDV	0.154861	0.154861
V	X3UTR_AVG	0.113097	0.113097
V	X3UTR_SDV	0.178966	0.178966
V	X3UTR_MIN	-0.133489	0.133489
V	X3UTR_Q23	-0.122223	0.122223
V	X3UTR_Q73	0.165107	0.165107
V	X3UTR_MAX	0.136091	0.136091
V	X3UTR_FIRST10_AVG	0.0983501	0.0983501
V	X3UTR_FIRST10_SDV	0.124606	0.124606
I	C	0.186833	0.186833
I	Y	0.0987163	0.0987163
I	R	-0.13725	0.13725
I	ncont	-0.277115	0.277115
I	scont	0.146376	0.146376
I	Number.of.introns	-0.10327	0.10327
I	First.intron.length	-0.102437	0.102437
I	First.intron.GC	-0.103171	0.103171
I	Ribosome.occupancy	-0.125304	0.125304
I	Ribosome.density..rb.kb.	-0.125102	0.125102
I	ORF.length..nt.	0.110216	0.110216
I	mRNA.level	-0.100514	0.100514
I	GO.0006412_PROTEIN_BIOSYNTHESIS	-0.149782	0.149782
I	er	0.154261	0.154261
I	MOLECULAR.WEIGHT..in.Daltons.	0.150095	0.150095
I	CAI..Codon.Adaptation.Index.	-0.100439	0.100439
I	PROTEIN.LENGTH	0.14526	0.14526
I	CODON.BIAS	-0.131898	0.131898
I	ASN	0.106083	0.106083
I	CYS	0.236828	0.236828
I	GLY	0.116199	0.116199
I	HIS	0.124381	0.124381
I	ILE	0.491062	0.491062
I	LEU	0.234109	0.234109
I	MET	0.180257	0.180257
I	PHE	0.235853	0.235853
I	THR	0.0992876	0.0992876
I	TRP	0.160247	0.160247
I	TYR	0.177762	0.177762
I	VAL	0.184899	0.184899
I	GRAVY.SCORE..Hydropathicity.of.Protein.	0.538792	0.538792
I	AROMATICITY.SCORE..Frequency.of.aromatic.amino.acids..Phe..Tyr..Trp.	0.194344	0.194344
I	u5TG	0.101251	0.101251
I	lcds	0.146187	0.146187
I	cdsC	-0.230309	0.230309
I	cdsT	0.427779	0.427779
I	cdsG	-0.23285	0.23285
I	cdsAC	-0.239324	0.239324
I	cdsAT	0.505177	0.505177
I	cdsAG	-0.299527	0.299527
I	cdsCG	-0.129651	0.129651
I	cdsAUel	0.143403	0.143403
I	lorf.x	0.141313	0.141313
I	nostems	0.130829	0.130829
I	length	0.140854	0.140854
I	lorf.y	0.144322	0.144322
I	orfstems	-0.145087	0.145087
I	co	0.129313	0.129313
I	orflength	0.139707	0.139707
I	energy	-0.125324	0.125324
I	CDS_AVG	-0.108467	0.108467
I	CDS_SDV	-0.113471	0.113471
I	CDS_RELSTDEV	0.0988111	0.0988111
I	CDS_LN	0.145263	0.145263
I	CDS_MEDIAN	-0.0974878	0.0974878
I	CDS_Q75	-0.133795	0.133795
C	Y	0.186941	0.186941
C	H	0.142349	0.142349
C	ncont	-0.175557	0.175557
C	scont	0.708826	0.708826
C	Number.of.introns	-0.114641	0.114641
C	First.intron.length	-0.115382	0.115382
C	First.intron.GC	-0.115058	0.115058
C	Ribosome.occupancy	-0.1799	0.1799
C	mRNA.level	-0.165566	0.165566
C	GO.0006412_PROTEIN_BIOSYNTHESIS	-0.162483	0.162483
C	CAI..Codon.Adaptation.Index.	-0.19279	0.19279
C	CODON.BIAS	-0.202396	0.202396
C	CYS	0.75859	0.75859
C	HIS	0.127171	0.127171
C	ILE	0.133607	0.133607
C	LEU	0.105272	0.105272
C	MET	0.120307	0.120307
C	PHE	0.124447	0.124447
C	TRP	0.184822	0.184822
C	TYR	0.145989	0.145989
C	FOP.SCORE..Frequency.of.Optimal.Codons.	-0.192038	0.192038
C	GRAVY.SCORE..Hydropathicity.of.Protein.	0.29727	0.29727
C	AROMATICITY.SCORE..Frequency.of.aromatic.amino.acids..Phe..Tyr..Trp.	0.230656	0.230656
C	cdsA	-0.194413	0.194413
C	cdsT	0.26269	0.26269
C	cdsAC	-0.109302	0.109302
C	cdsAT	0.228473	0.228473
C	cdsAG	-0.245721	0.245721
C	cdsTG	0.278582	0.278582
C	CDS_AVG	-0.139817	0.139817
C	CDS_SDV	-0.12331	0.12331
C	CDS_RELSTDEV	0.112471	0.112471
C	CDS_Q25	0.150406	0.150406
C	CDS_MEDIAN	-0.125166	0.125166
C	CDS_Q75	-0.154214	0.154214
C	CDS_MAX	-0.118903	0.118903
C	CDS_FIRST10_SDV	-0.0991068	0.0991068
C	X5UTR_SDV	-0.132133	0.132133
C	X5UTR_Q25	0.108057	0.108057
C	X5UTR_FIRST10_SDV	-0.125416	0.125416
C	X5UTR_LAST10_SDV	-0.117436	0.117436
C	X3UTR_SDV	-0.11043	0.11043
C	X3UTR_Q73	-0.110497	0.110497
C	X3UTR_MAX	-0.114584	0.114584
Y	R	-0.117459	0.117459
Y	ncont	-0.164254	0.164254
Y	scont	0.134777	0.134777
Y	GO.0006412_PROTEIN_BIOSYNTHESIS	-0.10518	0.10518
Y	vac	0.117565	0.117565
Y	er	0.140311	0.140311
Y	MOLECULAR.WEIGHT..in.Daltons.	0.0949617	0.0949617
Y	CODON.BIAS	-0.103057	0.103057
Y	CYS	0.180065	0.180065
Y	HIS	0.0994521	0.0994521
Y	ILE	0.10711	0.10711
Y	LEU	0.11992	0.11992
Y	MET	0.104007	0.104007
Y	PHE	0.213192	0.213192
Y	TRP	0.283765	0.283765
Y	TYR	0.548902	0.548902
Y	FOP.SCORE..Frequency.of.Optimal.Codons.	-0.0936511	0.0936511
Y	GRAVY.SCORE..Hydropathicity.of.Protein.	0.181095	0.181095
Y	AROMATICITY.SCORE..Frequency.of.aromatic.amino.acids..Phe..Tyr..Trp.	0.717416	0.717416
Y	u5TG	0.0972785	0.0972785
Y	cdsA	-0.155654	0.155654
Y	cdsT	0.337667	0.337667
Y	cdsG	-0.20771	0.20771
Y	cdsAT	0.292952	0.292952
Y	cdsAG	-0.29996	0.29996
Y	cdsCT	0.0941482	0.0941482
H	R	0.0940133	0.0940133
H	ncont	0.311336	0.311336
H	scont	0.106778	0.106778
H	Ribosome.occupancy	-0.12253	0.12253
H	Ribosome.density..rb.kb.	-0.0963081	0.0963081
H	mRNA.level	-0.150554	0.150554
H	GO.0006810_TRANSPORT	-0.1431	0.1431
H	MOLECULAR.WEIGHT..in.Daltons.	0.0961226	0.0961226
H	PI	0.129338	0.129338
H	CAI..Codon.Adaptation.Index.	-0.102642	0.102642
H	CODON.BIAS	-0.128421	0.128421
H	ARG	0.134977	0.134977
H	CYS	0.158678	0.158678
H	HIS	0.623917	0.623917
H	LEU	0.093621	0.093621
H	MET	0.100856	0.100856
H	PRO	0.135051	0.135051
H	TRP	0.170535	0.170535
H	TYR	0.109145	0.109145
H	FOP.SCORE..Frequency.of.Optimal.Codons.	-0.121846	0.121846
H	cdsC	0.136686	0.136686
H	cdsAC	0.17842	0.17842
H	cdsAT	0.127482	0.127482
H	CDS_SDV	-0.110573	0.110573
H	CDS_MEDIAN	-0.105187	0.105187
H	CDS_Q75	-0.0947888	0.0947888
H	X5UTR_AVG	-0.0974535	0.0974535
H	X5UTR_SDV	-0.14642	0.14642
H	X5UTR_Q25	0.102533	0.102533
H	X5UTR_Q75	-0.132046	0.132046
H	X5UTR_FIRST10_AVG	-0.0987278	0.0987278
H	X5UTR_FIRST10_SDV	-0.114932	0.114932
H	X5UTR_LAST10_SDV	-0.110205	0.110205
H	X3UTR_Q73	-0.12978	0.12978
H	X3UTR_FIRST10_SDV	-0.0949098	0.0949098
R	N	-0.106283	0.106283
R	T	-0.114194	0.114194
R	ncont	0.789996	0.789996
R	Number.of.introns	0.179899	0.179899
R	First.intron.length	0.177873	0.177873
R	First.intron.GC	0.18	0.18
R	ORF.length..nt.	-0.10815	0.10815
R	GO.0006412_PROTEIN_BIOSYNTHESIS	0.257444	0.257444
R	vac	-0.139808	0.139808
R	mito	0.144851	0.144851
R	er	-0.165757	0.165757
R	MOLECULAR.WEIGHT..in.Daltons.	-0.118268	0.118268
R	PI	0.417353	0.417353
R	PROTEIN.LENGTH	-0.130694	0.130694
R	ALA	-0.146734	0.146734
R	ARG	0.415826	0.415826
R	ASN	-0.14569	0.14569
R	ASP	-0.0975491	0.0975491
R	CYS	-0.131736	0.131736
R	GLY	-0.140337	0.140337
R	ILE	-0.153211	0.153211
R	LEU	-0.132106	0.132106
R	PHE	-0.193236	0.193236
R	SER	-0.178875	0.178875
R	THR	-0.167328	0.167328
R	TRP	-0.15952	0.15952
R	TYR	-0.16048	0.16048
R	VAL	-0.136869	0.136869
R	GRAVY.SCORE..Hydropathicity.of.Protein.	-0.354191	0.354191
R	AROMATICITY.SCORE..Frequency.of.aromatic.amino.acids..Phe..Tyr..Trp.	-0.208304	0.208304
R	lcds	-0.12974	0.12974
R	cdsA	0.169942	0.169942
R	cdsT	-0.306084	0.306084
R	cdsG	0.2754	0.2754
R	cdsAT	-0.153435	0.153435
R	cdsAG	0.47035	0.47035
R	cdsCT	-0.216294	0.216294
R	cdsTG	-0.155143	0.155143
R	cdsAUel	-0.130305	0.130305
R	lorf.x	-0.129495	0.129495
R	nostems	-0.114461	0.114461
R	length	-0.129734	0.129734
R	lorf.y	-0.129852	0.129852
R	relnostems	0.12843	0.12843
R	orfstems	0.125608	0.125608
R	co	-0.117759	0.117759
R	orflength	-0.129559	0.129559
R	score	-0.161948	0.161948
R	energy	0.114112	0.114112
R	CDS_AVG	-0.146594	0.146594
R	CDS_RELSTDEV	0.173108	0.173108
R	CDS_LN	-0.130705	0.130705
R	X5UTR_Q75	-0.096594	0.096594
N	D	0.0965664	0.0965664
N	ncont	0.164027	0.164027
N	Number.of.introns	-0.128447	0.128447
N	First.intron.length	-0.12863	0.12863
N	First.intron.GC	-0.127784	0.127784
N	Ribosome.occupancy	-0.228253	0.228253
N	Ribosome.density..rb.kb.	-0.221564	0.221564
N	ORF.length..nt.	0.193636	0.193636
N	mRNA.level	-0.298193	0.298193
N	GO.0006350_TRANSCRIPTION	0.0961393	0.0961393
N	GO.0006412_PROTEIN_BIOSYNTHESIS	-0.14168	0.14168
N	MOLECULAR.WEIGHT..in.Daltons.	0.219404	0.219404
N	PI	-0.105038	0.105038
N	CAI..Codon.Adaptation.Index.	-0.222997	0.222997
N	PROTEIN.LENGTH	0.214843	0.214843
N	CODON.BIAS	-0.289991	0.289991
N	ARG	0.135509	0.135509
N	ASN	0.578656	0.578656
N	ASP	0.229134	0.229134
N	GLN	0.262632	0.262632
N	GLU	0.179054	0.179054
N	HIS	0.160423	0.160423
N	ILE	0.16404	0.16404
N	LEU	0.1763	0.1763
N	LYS	0.165807	0.165807
N	MET	0.144752	0.144752
N	PHE	0.175091	0.175091
N	PRO	0.198775	0.198775
N	SER	0.265312	0.265312
N	THR	0.191155	0.191155
N	TYR	0.151856	0.151856
N	FOP.SCORE..Frequency.of.Optimal.Codons.	-0.260098	0.260098
N	GRAVY.SCORE..Hydropathicity.of.Protein.	-0.270838	0.270838
N	u5A	-0.147026	0.147026
N	u5T	0.0939187	0.0939187
N	u5TG	0.116137	0.116137
N	lcds	0.210319	0.210319
N	cdsA	0.357517	0.357517
N	cdsG	-0.32692	0.32692
N	cdsAC	0.211976	0.211976
N	cdsAT	0.268997	0.268997
N	cdsAG	-0.0983731	0.0983731
N	cdsCT	-0.1328	0.1328
N	cdsTG	-0.287717	0.287717
N	cdsAUel	0.214355	0.214355
N	lorf.x	0.208949	0.208949
N	nostems	0.198101	0.198101
N	relstems	-0.174224	0.174224
N	length	0.212482	0.212482
N	lorf.y	0.2139	0.2139
N	relnostems	-0.138238	0.138238
N	orfstems	-0.192943	0.192943
N	co	0.195885	0.195885
N	orflength	0.212587	0.212587
N	energy	-0.17441	0.17441
N	CDS_AVG	-0.141239	0.141239
N	CDS_SDV	-0.32861	0.32861
N	CDS_LN	0.21484	0.21484
N	CDS_MIN	0.195116	0.195116
N	CDS_Q25	0.255649	0.255649
N	CDS_MEDIAN	-0.235788	0.235788
N	CDS_Q75	-0.258991	0.258991
N	CDS_MAX	-0.208187	0.208187
N	CDS_FIRST10_AVG	-0.104174	0.104174
N	CDS_FIRST10_SDV	-0.229939	0.229939
N	CDS_LAST10_AVG	-0.116778	0.116778
N	CDS_LAST10_SDV	-0.157861	0.157861
N	X5UTR_AVG	-0.139656	0.139656
N	X5UTR_SDV	-0.214337	0.214337
N	X5UTR_MIN	0.160362	0.160362
N	X5UTR_Q25	0.199646	0.199646
N	X5UTR_Q75	-0.112041	0.112041
N	X5UTR_MAX	-0.117534	0.117534
N	X5UTR_FIRST10_AVG	-0.102472	0.102472
N	X5UTR_FIRST10_SDV	-0.158592	0.158592
N	X5UTR_LAST10_AVG	-0.105486	0.105486
N	X5UTR_LAST10_SDV	-0.174312	0.174312
N	X3UTR_AVG	-0.110423	0.110423
N	X3UTR_SDV	-0.231411	0.231411
N	X3UTR_MIN	0.186293	0.186293
N	X3UTR_Q23	0.120083	0.120083
N	X3UTR_Q73	-0.177554	0.177554
N	X3UTR_MAX	-0.180727	0.180727
N	X3UTR_FIRST10_AVG	-0.108086	0.108086
N	X3UTR_FIRST10_SDV	-0.17818	0.17818
D	T	-0.141818	0.141818
D	Number.of.introns	-0.125121	0.125121
D	First.intron.length	-0.125894	0.125894
D	First.intron.GC	-0.125288	0.125288
D	ORF.length..nt.	0.110455	0.110455
D	GO.0006350_TRANSCRIPTION	0.107639	0.107639
D	GO.0006412_PROTEIN_BIOSYNTHESIS	-0.142158	0.142158
D	GO.0006810_TRANSPORT	-0.142623	0.142623
D	nuc	0.248426	0.248426
D	cyto	0.170835	0.170835
D	mito	-0.199965	0.199965
D	er	-0.207476	0.207476
D	MOLECULAR.WEIGHT..in.Daltons.	0.133739	0.133739
D	PI	-0.569525	0.569525
D	PROTEIN.LENGTH	0.127863	0.127863
D	CODON.BIAS	-0.0991059	0.0991059
D	ARG	0.100378	0.100378
D	ASN	0.142371	0.142371
D	ASP	0.523887	0.523887
D	GLN	0.121045	0.121045
D	GLU	0.293459	0.293459
D	HIS	0.113493	0.113493
D	LYS	0.190974	0.190974
D	GRAVY.SCORE..Hydropathicity.of.Protein.	-0.320084	0.320084
D	AROMATICITY.SCORE..Frequency.of.aromatic.amino.acids..Phe..Tyr..Trp.	-0.126171	0.126171
D	lcds	0.126985	0.126985
D	cdsA	0.257417	0.257417
D	cdsC	-0.238701	0.238701
D	cdsT	-0.15036	0.15036
D	cdsG	0.153895	0.153895
D	cdsAT	0.18676	0.18676
D	cdsAG	0.154718	0.154718
D	cdsCT	-0.295969	0.295969
D	cdsCG	0.113699	0.113699
D	cdsAUel	0.127978	0.127978
D	lorf.x	0.112907	0.112907
D	nostems	0.124656	0.124656
D	relstems	-0.0998759	0.0998759
D	length	0.113336	0.113336
D	lorf.y	0.127757	0.127757
D	relnostems	0.103727	0.103727
D	co	0.13659	0.13659
D	orflength	0.113781	0.113781
D	energy	-0.116598	0.116598
D	CDS_SDV	-0.0937468	0.0937468
D	CDS_LN	0.127862	0.127862
D	CDS_MEDIAN	-0.106132	0.106132
D	CDS_Q75	-0.103511	0.103511
D	X3UTR_SDV	-0.0934144	0.0934144
D	X3UTR_Q23	0.0981206	0.0981206
D	X3UTR_Q73	-0.107289	0.107289
D	X3UTR_MAX	-0.093392	0.093392
T	ncont	-0.18412	0.18412
T	Ribosome.occupancy	-0.106632	0.106632
T	ORF.length..nt.	0.0975977	0.0975977
T	MOLECULAR.WEIGHT..in.Daltons.	0.103369	0.103369
T	PROTEIN.LENGTH	0.114565	0.114565
T	ALA	0.130481	0.130481
T	ASN	0.102751	0.102751
T	GLY	0.101686	0.101686
T	PRO	0.108369	0.108369
T	SER	0.161053	0.161053
T	THR	0.455618	0.455618
T	VAL	0.110027	0.110027
T	GRAVY.SCORE..Hydropathicity.of.Protein.	0.100977	0.100977
T	lu5.x	0.0966425	0.0966425
T	X5AUel	0.0971603	0.0971603
T	lcds	0.113973	0.113973
T	cdsA	-0.10631	0.10631
T	cdsC	0.300042	0.300042
T	cdsG	-0.198823	0.198823
T	cdsAC	0.464368	0.464368
T	cdsAT	-0.118744	0.118744
T	cdsAG	-0.237168	0.237168
T	cdsCT	0.23426	0.23426
T	cdsCG	0.106794	0.106794
T	cdsTG	-0.093322	0.093322
T	cdsAUel	0.114797	0.114797
T	lorf.x	0.126377	0.126377
T	nostems	0.119412	0.119412
T	length	0.126141	0.126141
T	lu5.y	0.0964675	0.0964675
T	lorf.y	0.114453	0.114453
T	c5	0.098986	0.098986
T	co	0.107226	0.107226
T	orflength	0.126733	0.126733
T	score	0.144608	0.144608
T	energy	-0.116702	0.116702
T	CDS_AVG	0.123789	0.123789
T	CDS_RELSTDEV	-0.144724	0.144724
T	CDS_LN	0.114555	0.114555
T	X5UTR_LN	0.0962934	0.0962934
ncont	scont	-0.123651	0.123651
ncont	Number.of.introns	0.161741	0.161741
ncont	First.intron.length	0.160856	0.160856
ncont	First.intron.GC	0.16173	0.16173
ncont	GO.0006350_TRANSCRIPTION	0.103762	0.103762
ncont	GO.0006412_PROTEIN_BIOSYNTHESIS	0.276191	0.276191
ncont	GO.0006810_TRANSPORT	-0.120177	0.120177
ncont	vac	-0.177604	0.177604
ncont	mito	0.104738	0.104738
ncont	er	-0.222783	0.222783
ncont	MOLECULAR.WEIGHT..in.Daltons.	-0.102501	0.102501
ncont	PI	0.479453	0.479453
ncont	PROTEIN.LENGTH	-0.119535	0.119535
ncont	ALA	-0.206505	0.206505
ncont	ARG	0.324346	0.324346
ncont	CYS	-0.194856	0.194856
ncont	GLY	-0.209618	0.209618
ncont	HIS	0.105571	0.105571
ncont	ILE	-0.200627	0.200627
ncont	LEU	-0.157963	0.157963
ncont	MET	-0.119187	0.119187
ncont	PHE	-0.221297	0.221297
ncont	SER	-0.158261	0.158261
ncont	THR	-0.185687	0.185687
ncont	TRP	-0.13932	0.13932
ncont	TYR	-0.174947	0.174947
ncont	VAL	-0.201642	0.201642
ncont	GRAVY.SCORE..Hydropathicity.of.Protein.	-0.650449	0.650449
ncont	AROMATICITY.SCORE..Frequency.of.aromatic.amino.acids..Phe..Tyr..Trp.	-0.267988	0.267988
ncont	u3AG	-0.100776	0.100776
ncont	lcds	-0.117068	0.117068
ncont	cdsA	0.452546	0.452546
ncont	cdsT	-0.495604	0.495604
ncont	cdsG	0.107198	0.107198
ncont	cdsAC	0.119341	0.119341
ncont	cdsAT	-0.13716	0.13716
ncont	cdsAG	0.514257	0.514257
ncont	cdsCT	-0.31519	0.31519
ncont	cdsTG	-0.366272	0.366272
ncont	cdsAUel	-0.119182	0.119182
ncont	lorf.x	-0.117616	0.117616
ncont	nostems	-0.112327	0.112327
ncont	length	-0.119703	0.119703
ncont	lorf.y	-0.118456	0.118456
ncont	co	-0.115061	0.115061
ncont	orflength	-0.119236	0.119236
ncont	score	-0.17022	0.17022
ncont	energy	0.129346	0.129346
ncont	CDS_AVG	-0.193297	0.193297
ncont	CDS_SDV	-0.128893	0.128893
ncont	CDS_RELSTDEV	0.172636	0.172636
ncont	CDS_LN	-0.119544	0.119544
ncont	CDS_MIN	0.107184	0.107184
ncont	CDS_MEDIAN	-0.123443	0.123443
ncont	CDS_Q75	-0.139111	0.139111
ncont	CDS_MAX	-0.136633	0.136633
ncont	X5UTR_SDV	-0.107832	0.107832
ncont	X5UTR_MEDIAN	-0.107958	0.107958
ncont	X5UTR_Q75	-0.15191	0.15191
ncont	X5UTR_MAX	-0.140003	0.140003
scont	Number.of.introns	-0.104431	0.104431
scont	First.intron.length	-0.10577	0.10577
scont	First.intron.GC	-0.104389	0.104389
scont	Ribosome.occupancy	-0.122317	0.122317
scont	mRNA.level	-0.134691	0.134691
scont	GO.0006412_PROTEIN_BIOSYNTHESIS	-0.12527	0.12527
scont	CAI..Codon.Adaptation.Index.	-0.220095	0.220095
scont	CODON.BIAS	-0.194065	0.194065
scont	ALA	-0.127087	0.127087
scont	CYS	0.489185	0.489185
scont	GLU	-0.131666	0.131666
scont	LYS	-0.168747	0.168747
scont	MET	0.355728	0.355728
scont	FOP.SCORE..Frequency.of.Optimal.Codons.	-0.196653	0.196653
scont	GRAVY.SCORE..Hydropathicity.of.Protein.	0.276975	0.276975
scont	AROMATICITY.SCORE..Frequency.of.aromatic.amino.acids..Phe..Tyr..Trp.	0.183581	0.183581
scont	cdsA	-0.172503	0.172503
scont	cdsC	-0.0957146	0.0957146
scont	cdsT	0.183307	0.183307
scont	cdsAC	-0.123941	0.123941
scont	cdsAT	0.257886	0.257886
scont	cdsAG	-0.211731	0.211731
scont	cdsTG	0.30741	0.30741
scont	CDS_AVG	-0.14466	0.14466
scont	CDS_MEDIAN	-0.122837	0.122837
scont	CDS_Q75	-0.13043	0.13043
scont	CDS_MAX	-0.124901	0.124901
Number.of.introns	First.intron.length	0.998911	0.998911
Number.of.introns	First.intron.GC	0.998911	0.998911
Number.of.introns	Ribosome.occupancy	0.142386	0.142386
Number.of.introns	Ribosome.density..rb.kb.	0.121535	0.121535
Number.of.introns	ORF.length..nt.	-0.208572	0.208572
Number.of.introns	mRNA.level	0.259338	0.259338
Number.of.introns	GO.0006412_PROTEIN_BIOSYNTHESIS	0.345788	0.345788
Number.of.introns	cyto	0.111666	0.111666
Number.of.introns	MOLECULAR.WEIGHT..in.Daltons.	-0.266681	0.266681
Number.of.introns	PI	0.182554	0.182554
Number.of.introns	CAI..Codon.Adaptation.Index.	0.232876	0.232876
Number.of.introns	PROTEIN.LENGTH	-0.266966	0.266966
Number.of.introns	CODON.BIAS	0.232055	0.232055
Number.of.introns	ALA	-0.182072	0.182072
Number.of.introns	ARG	-0.132399	0.132399
Number.of.introns	ASN	-0.267171	0.267171
Number.of.introns	ASP	-0.260045	0.260045
Number.of.introns	CYS	-0.216518	0.216518
Number.of.introns	GLN	-0.222969	0.222969
Number.of.introns	GLU	-0.246714	0.246714
Number.of.introns	GLY	-0.215553	0.215553
Number.of.introns	HIS	-0.223418	0.223418
Number.of.introns	ILE	-0.260521	0.260521
Number.of.introns	LEU	-0.265331	0.265331
Number.of.introns	LYS	-0.190148	0.190148
Number.of.introns	MET	-0.270118	0.270118
Number.of.introns	PHE	-0.236404	0.236404
Number.of.introns	PRO	-0.241777	0.241777
Number.of.introns	SER	-0.264805	0.264805
Number.of.introns	THR	-0.251325	0.251325
Number.of.introns	TRP	-0.188501	0.188501
Number.of.introns	TYR	-0.231979	0.231979
Number.of.introns	VAL	-0.222541	0.222541
Number.of.introns	FOP.SCORE..Frequency.of.Optimal.Codons.	0.232785	0.232785
Number.of.introns	GRAVY.SCORE..Hydropathicity.of.Protein.	-0.100203	0.100203
Number.of.introns	u3T	0.099243	0.099243
Number.of.introns	u3G	-0.121878	0.121878
Number.of.introns	lu5.x	-0.122786	0.122786
Number.of.introns	u5A	0.131376	0.131376
Number.of.introns	u5T	-0.133139	0.133139
Number.of.introns	X5AUel	-0.122734	0.122734
Number.of.introns	lcds	-0.263216	0.263216
Number.of.introns	cdsAT	-0.200762	0.200762
Number.of.introns	cdsAG	0.14147	0.14147
Number.of.introns	cdsAUel	-0.266756	0.266756
Number.of.introns	lorf.x	-0.254314	0.254314
Number.of.introns	nostems	-0.257104	0.257104
Number.of.introns	relstems	0.204041	0.204041
Number.of.introns	length	-0.257511	0.257511
Number.of.introns	lu5.y	-0.122545	0.122545
Number.of.introns	lorf.y	-0.266146	0.266146
Number.of.introns	c5	-0.106174	0.106174
Number.of.introns	co	-0.265645	0.265645
Number.of.introns	orflength	-0.257256	0.257256
Number.of.introns	score	-0.120475	0.120475
Number.of.introns	energy	0.255936	0.255936
Number.of.introns	CDS_AVG	0.099825	0.099825
Number.of.introns	CDS_SDV	0.253016	0.253016
Number.of.introns	CDS_LN	-0.266964	0.266964
Number.of.introns	CDS_MIN	-0.130995	0.130995
Number.of.introns	CDS_Q25	-0.285329	0.285329
Number.of.introns	CDS_MEDIAN	0.212177	0.212177
Number.of.introns	CDS_Q75	0.225503	0.225503
Number.of.introns	CDS_MAX	0.175323	0.175323
Number.of.introns	CDS_FIRST10_SDV	0.165801	0.165801
Number.of.introns	CDS_LAST10_AVG	0.100846	0.100846
Number.of.introns	CDS_LAST10_SDV	0.125755	0.125755
Number.of.introns	X5UTR_AVG	0.118781	0.118781
Number.of.introns	X5UTR_SDV	0.147806	0.147806
Number.of.introns	X5UTR_LN	-0.122481	0.122481
Number.of.introns	X5UTR_MIN	-0.141333	0.141333
Number.of.introns	X5UTR_Q25	-0.191116	0.191116
Number.of.introns	X5UTR_MEDIAN	-0.128291	0.128291
Number.of.introns	X5UTR_FIRST10_SDV	0.109566	0.109566
Number.of.introns	X5UTR_LAST10_SDV	0.172642	0.172642
Number.of.introns	X3UTR_AVG	0.150187	0.150187
Number.of.introns	X3UTR_SDV	0.204567	0.204567
Number.of.introns	X3UTR_MIN	-0.14305	0.14305
Number.of.introns	X3UTR_Q23	-0.214626	0.214626
Number.of.introns	X3UTR_Q73	0.187713	0.187713
Number.of.introns	X3UTR_MAX	0.164137	0.164137
Number.of.introns	X3UTR_FIRST10_AVG	0.123882	0.123882
Number.of.introns	X3UTR_FIRST10_SDV	0.130473	0.130473
First.intron.length	First.intron.GC	0.996957	0.996957
First.intron.length	Ribosome.occupancy	0.141942	0.141942
First.intron.length	Ribosome.density..rb.kb.	0.121817	0.121817
First.intron.length	ORF.length..nt.	-0.207337	0.207337
First.intron.length	mRNA.level	0.25815	0.25815
First.intron.length	GO.0006412_PROTEIN_BIOSYNTHESIS	0.344337	0.344337
First.intron.length	cyto	0.111777	0.111777
First.intron.length	MOLECULAR.WEIGHT..in.Daltons.	-0.265457	0.265457
First.intron.length	PI	0.181279	0.181279
First.intron.length	CAI..Codon.Adaptation.Index.	0.232462	0.232462
First.intron.length	PROTEIN.LENGTH	-0.265794	0.265794
First.intron.length	CODON.BIAS	0.231812	0.231812
First.intron.length	ALA	-0.181598	0.181598
First.intron.length	ARG	-0.132408	0.132408
First.intron.length	ASN	-0.266302	0.266302
First.intron.length	ASP	-0.259299	0.259299
First.intron.length	CYS	-0.216432	0.216432
First.intron.length	GLN	-0.220732	0.220732
First.intron.length	GLU	-0.245209	0.245209
First.intron.length	GLY	-0.215601	0.215601
First.intron.length	HIS	-0.223087	0.223087
First.intron.length	ILE	-0.259333	0.259333
First.intron.length	LEU	-0.26389	0.26389
First.intron.length	LYS	-0.188926	0.188926
First.intron.length	MET	-0.269483	0.269483
First.intron.length	PHE	-0.235715	0.235715
First.intron.length	PRO	-0.240149	0.240149
First.intron.length	SER	-0.263388	0.263388
First.intron.length	THR	-0.250305	0.250305
First.intron.length	TRP	-0.187321	0.187321
First.intron.length	TYR	-0.23084	0.23084
First.intron.length	VAL	-0.222069	0.222069
First.intron.length	FOP.SCORE..Frequency.of.Optimal.Codons.	0.232615	0.232615
First.intron.length	GRAVY.SCORE..Hydropathicity.of.Protein.	-0.100501	0.100501
First.intron.length	u3T	0.0979895	0.0979895
First.intron.length	u3G	-0.120931	0.120931
First.intron.length	lu5.x	-0.12153	0.12153
First.intron.length	u5A	0.13062	0.13062
First.intron.length	u5T	-0.132478	0.132478
First.intron.length	X5AUel	-0.121456	0.121456
First.intron.length	lcds	-0.262052	0.262052
First.intron.length	cdsAT	-0.200299	0.200299
First.intron.length	cdsAG	0.141118	0.141118
First.intron.length	cdsAUel	-0.265574	0.265574
First.intron.length	lorf.x	-0.252903	0.252903
First.intron.length	nostems	-0.255618	0.255618
First.intron.length	relstems	0.203887	0.203887
First.intron.length	length	-0.256091	0.256091
First.intron.length	lu5.y	-0.12129	0.12129
First.intron.length	lorf.y	-0.264975	0.264975
First.intron.length	c5	-0.105011	0.105011
First.intron.length	co	-0.264544	0.264544
First.intron.length	orflength	-0.255836	0.255836
First.intron.length	score	-0.120054	0.120054
First.intron.length	energy	0.254793	0.254793
First.intron.length	CDS_AVG	0.0993641	0.0993641
First.intron.length	CDS_SDV	0.252422	0.252422
First.intron.length	CDS_LN	-0.265792	0.265792
First.intron.length	CDS_MIN	-0.130972	0.130972
First.intron.length	CDS_Q25	-0.283777	0.283777
First.intron.length	CDS_MEDIAN	0.21104	0.21104
First.intron.length	CDS_Q75	0.224923	0.224923
First.intron.length	CDS_MAX	0.175625	0.175625
First.intron.length	CDS_FIRST10_SDV	0.165139	0.165139
First.intron.length	CDS_LAST10_AVG	0.101875	0.101875
First.intron.length	CDS_LAST10_SDV	0.126872	0.126872
First.intron.length	X5UTR_AVG	0.117497	0.117497
First.intron.length	X5UTR_SDV	0.14678	0.14678
First.intron.length	X5UTR_LN	-0.121223	0.121223
First.intron.length	X5UTR_MIN	-0.141032	0.141032
First.intron.length	X5UTR_Q25	-0.18966	0.18966
First.intron.length	X5UTR_MEDIAN	-0.129356	0.129356
First.intron.length	X5UTR_FIRST10_SDV	0.108958	0.108958
First.intron.length	X5UTR_LAST10_SDV	0.172587	0.172587
First.intron.length	X3UTR_AVG	0.15096	0.15096
First.intron.length	X3UTR_SDV	0.204213	0.204213
First.intron.length	X3UTR_MIN	-0.142732	0.142732
First.intron.length	X3UTR_Q23	-0.212664	0.212664
First.intron.length	X3UTR_Q73	0.186505	0.186505
First.intron.length	X3UTR_MAX	0.163766	0.163766
First.intron.length	X3UTR_FIRST10_AVG	0.123406	0.123406
First.intron.length	X3UTR_FIRST10_SDV	0.129773	0.129773
First.intron.GC	Ribosome.occupancy	0.142516	0.142516
First.intron.GC	Ribosome.density..rb.kb.	0.12103	0.12103
First.intron.GC	ORF.length..nt.	-0.208225	0.208225
First.intron.GC	mRNA.level	0.258511	0.258511
First.intron.GC	GO.0006412_PROTEIN_BIOSYNTHESIS	0.345773	0.345773
First.intron.GC	cyto	0.110287	0.110287
First.intron.GC	MOLECULAR.WEIGHT..in.Daltons.	-0.266475	0.266475
First.intron.GC	PI	0.183035	0.183035
First.intron.GC	CAI..Codon.Adaptation.Index.	0.232523	0.232523
First.intron.GC	PROTEIN.LENGTH	-0.26668	0.26668
First.intron.GC	CODON.BIAS	0.231549	0.231549
First.intron.GC	ALA	-0.181705	0.181705
First.intron.GC	ARG	-0.132035	0.132035
First.intron.GC	ASN	-0.266715	0.266715
First.intron.GC	ASP	-0.259746	0.259746
First.intron.GC	CYS	-0.216461	0.216461
First.intron.GC	GLN	-0.223144	0.223144
First.intron.GC	GLU	-0.246878	0.246878
First.intron.GC	GLY	-0.214096	0.214096
First.intron.GC	HIS	-0.223316	0.223316
First.intron.GC	ILE	-0.260231	0.260231
First.intron.GC	LEU	-0.265922	0.265922
First.intron.GC	LYS	-0.190406	0.190406
First.intron.GC	MET	-0.270118	0.270118
First.intron.GC	PHE	-0.236039	0.236039
First.intron.GC	PRO	-0.242407	0.242407
First.intron.GC	SER	-0.264403	0.264403
First.intron.GC	THR	-0.250989	0.250989
First.intron.GC	TRP	-0.18884	0.18884
First.intron.GC	TYR	-0.231968	0.231968
First.intron.GC	VAL	-0.221573	0.221573
First.intron.GC	FOP.SCORE..Frequency.of.Optimal.Codons.	0.232356	0.232356
First.intron.GC	GRAVY.SCORE..Hydropathicity.of.Protein.	-0.100039	0.100039
First.intron.GC	u3T	0.100069	0.100069
First.intron.GC	u3G	-0.122272	0.122272
First.intron.GC	lu5.x	-0.12208	0.12208
First.intron.GC	u5A	0.131703	0.131703
First.intron.GC	u5T	-0.13361	0.13361
First.intron.GC	X5AUel	-0.122067	0.122067
First.intron.GC	lcds	-0.262935	0.262935
First.intron.GC	cdsAT	-0.200536	0.200536
First.intron.GC	cdsAG	0.142281	0.142281
First.intron.GC	cdsAUel	-0.266459	0.266459
First.intron.GC	lorf.x	-0.254178	0.254178
First.intron.GC	nostems	-0.257046	0.257046
First.intron.GC	relstems	0.203112	0.203112
First.intron.GC	length	-0.257374	0.257374
First.intron.GC	lu5.y	-0.121839	0.121839
First.intron.GC	lorf.y	-0.265862	0.265862
First.intron.GC	c5	-0.10549	0.10549
First.intron.GC	co	-0.265376	0.265376
First.intron.GC	orflength	-0.257119	0.257119
First.intron.GC	score	-0.120254	0.120254
First.intron.GC	energy	0.25563	0.25563
First.intron.GC	CDS_AVG	0.0991155	0.0991155
First.intron.GC	CDS_SDV	0.25245	0.25245
First.intron.GC	CDS_LN	-0.266679	0.266679
First.intron.GC	CDS_MIN	-0.131039	0.131039
First.intron.GC	CDS_Q25	-0.284972	0.284972
First.intron.GC	CDS_MEDIAN	0.211946	0.211946
First.intron.GC	CDS_Q75	0.22495	0.22495
First.intron.GC	CDS_MAX	0.174163	0.174163
First.intron.GC	CDS_FIRST10_SDV	0.165366	0.165366
First.intron.GC	CDS_LAST10_AVG	0.0994919	0.0994919
First.intron.GC	CDS_LAST10_SDV	0.124842	0.124842
First.intron.GC	X5UTR_AVG	0.118355	0.118355
First.intron.GC	X5UTR_SDV	0.148032	0.148032
First.intron.GC	X5UTR_LN	-0.121773	0.121773
First.intron.GC	X5UTR_MIN	-0.141678	0.141678
First.intron.GC	X5UTR_Q25	-0.191862	0.191862
First.intron.GC	X5UTR_MEDIAN	-0.129148	0.129148
First.intron.GC	X5UTR_FIRST10_SDV	0.109348	0.109348
First.intron.GC	X5UTR_LAST10_SDV	0.172972	0.172972
First.intron.GC	X3UTR_AVG	0.149062	0.149062
First.intron.GC	X3UTR_SDV	0.203846	0.203846
First.intron.GC	X3UTR_MIN	-0.142715	0.142715
First.intron.GC	X3UTR_Q23	-0.213417	0.213417
First.intron.GC	X3UTR_Q73	0.187586	0.187586
First.intron.GC	X3UTR_MAX	0.163901	0.163901
First.intron.GC	X3UTR_FIRST10_AVG	0.123858	0.123858
First.intron.GC	X3UTR_FIRST10_SDV	0.130617	0.130617
mRNA.half.life.short	Ribosome.density..rb.kb.	0.109233	0.109233
mRNA.half.life.short	mRNA.level	0.107692	0.107692
Ribosome.occupancy	Ribosome.density..rb.kb.	0.523182	0.523182
Ribosome.occupancy	ORF.length..nt.	-0.478662	0.478662
Ribosome.occupancy	mRNA.level	0.468882	0.468882
Ribosome.occupancy	GO.0006350_TRANSCRIPTION	-0.144835	0.144835
Ribosome.occupancy	GO.0006412_PROTEIN_BIOSYNTHESIS	0.155531	0.155531
Ribosome.occupancy	MOLECULAR.WEIGHT..in.Daltons.	-0.489889	0.489889
Ribosome.occupancy	CAI..Codon.Adaptation.Index.	0.384534	0.384534
Ribosome.occupancy	PROTEIN.LENGTH	-0.484951	0.484951
Ribosome.occupancy	CODON.BIAS	0.388961	0.388961
Ribosome.occupancy	ALA	-0.308782	0.308782
Ribosome.occupancy	ARG	-0.445053	0.445053
Ribosome.occupancy	ASN	-0.497216	0.497216
Ribosome.occupancy	ASP	-0.398641	0.398641
Ribosome.occupancy	CYS	-0.429787	0.429787
Ribosome.occupancy	GLN	-0.416757	0.416757
Ribosome.occupancy	GLU	-0.340483	0.340483
Ribosome.occupancy	GLY	-0.325	0.325
Ribosome.occupancy	HIS	-0.440527	0.440527
Ribosome.occupancy	ILE	-0.47424	0.47424
Ribosome.occupancy	LEU	-0.485335	0.485335
Ribosome.occupancy	LYS	-0.36566	0.36566
Ribosome.occupancy	MET	-0.434792	0.434792
Ribosome.occupancy	PHE	-0.424398	0.424398
Ribosome.occupancy	PRO	-0.44346	0.44346
Ribosome.occupancy	SER	-0.523195	0.523195
Ribosome.occupancy	THR	-0.466157	0.466157
Ribosome.occupancy	TRP	-0.357039	0.357039
Ribosome.occupancy	TYR	-0.431954	0.431954
Ribosome.occupancy	VAL	-0.386803	0.386803
Ribosome.occupancy	FOP.SCORE..Frequency.of.Optimal.Codons.	0.390748	0.390748
Ribosome.occupancy	lu5.x	-0.212528	0.212528
Ribosome.occupancy	u5A	0.236274	0.236274
Ribosome.occupancy	u5T	-0.193882	0.193882
Ribosome.occupancy	u5G	-0.111064	0.111064
Ribosome.occupancy	u5AC	0.138889	0.138889
Ribosome.occupancy	u5CT	-0.10916	0.10916
Ribosome.occupancy	u5TG	-0.185371	0.185371
Ribosome.occupancy	X5AUel	-0.213117	0.213117
Ribosome.occupancy	lcds	-0.479734	0.479734
Ribosome.occupancy	cdsT	-0.111855	0.111855
Ribosome.occupancy	cdsG	0.242804	0.242804
Ribosome.occupancy	cdsAT	-0.306341	0.306341
Ribosome.occupancy	cdsAG	0.154567	0.154567
Ribosome.occupancy	cdsTG	0.196727	0.196727
Ribosome.occupancy	cdsAUel	-0.483991	0.483991
Ribosome.occupancy	lorf.x	-0.496243	0.496243
Ribosome.occupancy	nostems	-0.489735	0.489735
Ribosome.occupancy	relstems	0.357093	0.357093
Ribosome.occupancy	length	-0.499829	0.499829
Ribosome.occupancy	lu5.y	-0.211217	0.211217
Ribosome.occupancy	lorf.y	-0.48271	0.48271
Ribosome.occupancy	orfstems	0.154973	0.154973
Ribosome.occupancy	c5	-0.215052	0.215052
Ribosome.occupancy	co	-0.473352	0.473352
Ribosome.occupancy	orflength	-0.499428	0.499428
Ribosome.occupancy	score	-0.147456	0.147456
Ribosome.occupancy	energy	0.480597	0.480597
Ribosome.occupancy	CDS_AVG	0.291532	0.291532
Ribosome.occupancy	CDS_SDV	0.533198	0.533198
Ribosome.occupancy	CDS_RELSTDEV	-0.124683	0.124683
Ribosome.occupancy	CDS_LN	-0.484942	0.484942
Ribosome.occupancy	CDS_MIN	-0.238544	0.238544
Ribosome.occupancy	CDS_Q25	-0.485226	0.485226
Ribosome.occupancy	CDS_MEDIAN	0.387635	0.387635
Ribosome.occupancy	CDS_Q75	0.452888	0.452888
Ribosome.occupancy	CDS_MAX	0.313939	0.313939
Ribosome.occupancy	CDS_FIRST10_AVG	0.204914	0.204914
Ribosome.occupancy	CDS_FIRST10_SDV	0.329356	0.329356
Ribosome.occupancy	CDS_LAST10_AVG	0.177773	0.177773
Ribosome.occupancy	CDS_LAST10_SDV	0.233281	0.233281
Ribosome.occupancy	X5UTR_AVG	0.215275	0.215275
Ribosome.occupancy	X5UTR_SDV	0.384543	0.384543
Ribosome.occupancy	X5UTR_LN	-0.210512	0.210512
Ribosome.occupancy	X5UTR_MIN	-0.197863	0.197863
Ribosome.occupancy	X5UTR_Q25	-0.316318	0.316318
Ribosome.occupancy	X5UTR_Q75	0.258955	0.258955
Ribosome.occupancy	X5UTR_MAX	0.200428	0.200428
Ribosome.occupancy	X5UTR_FIRST10_AVG	0.235532	0.235532
Ribosome.occupancy	X5UTR_FIRST10_SDV	0.313232	0.313232
Ribosome.occupancy	X5UTR_LAST10_AVG	0.194873	0.194873
Ribosome.occupancy	X5UTR_LAST10_SDV	0.338766	0.338766
Ribosome.occupancy	X3UTR_AVG	0.184378	0.184378
Ribosome.occupancy	X3UTR_SDV	0.319845	0.319845
Ribosome.occupancy	X3UTR_MIN	-0.238175	0.238175
Ribosome.occupancy	X3UTR_Q23	-0.200251	0.200251
Ribosome.occupancy	X3UTR_Q73	0.254065	0.254065
Ribosome.occupancy	X3UTR_MAX	0.227137	0.227137
Ribosome.occupancy	X3UTR_FIRST10_AVG	0.193808	0.193808
Ribosome.occupancy	X3UTR_FIRST10_SDV	0.256778	0.256778
Ribosome.density..rb.kb.	ORF.length..nt.	-0.575101	0.575101
Ribosome.density..rb.kb.	mRNA.level	0.401475	0.401475
Ribosome.density..rb.kb.	MOLECULAR.WEIGHT..in.Daltons.	-0.561625	0.561625
Ribosome.density..rb.kb.	CAI..Codon.Adaptation.Index.	0.298116	0.298116
Ribosome.density..rb.kb.	PROTEIN.LENGTH	-0.557	0.557
Ribosome.density..rb.kb.	CODON.BIAS	0.322556	0.322556
Ribosome.density..rb.kb.	ALA	-0.391174	0.391174
Ribosome.density..rb.kb.	ARG	-0.52913	0.52913
Ribosome.density..rb.kb.	ASN	-0.56052	0.56052
Ribosome.density..rb.kb.	ASP	-0.478388	0.478388
Ribosome.density..rb.kb.	CYS	-0.394639	0.394639
Ribosome.density..rb.kb.	GLN	-0.488995	0.488995
Ribosome.density..rb.kb.	GLU	-0.440978	0.440978
Ribosome.density..rb.kb.	GLY	-0.407979	0.407979
Ribosome.density..rb.kb.	HIS	-0.487153	0.487153
Ribosome.density..rb.kb.	ILE	-0.531729	0.531729
Ribosome.density..rb.kb.	LEU	-0.55299	0.55299
Ribosome.density..rb.kb.	LYS	-0.467914	0.467914
Ribosome.density..rb.kb.	MET	-0.457519	0.457519
Ribosome.density..rb.kb.	PHE	-0.494897	0.494897
Ribosome.density..rb.kb.	PRO	-0.506956	0.506956
Ribosome.density..rb.kb.	SER	-0.569811	0.569811
Ribosome.density..rb.kb.	THR	-0.513514	0.513514
Ribosome.density..rb.kb.	TRP	-0.364715	0.364715
Ribosome.density..rb.kb.	TYR	-0.466394	0.466394
Ribosome.density..rb.kb.	VAL	-0.462544	0.462544
Ribosome.density..rb.kb.	FOP.SCORE..Frequency.of.Optimal.Codons.	0.324417	0.324417
Ribosome.density..rb.kb.	lu5.x	-0.144733	0.144733
Ribosome.density..rb.kb.	u5A	0.231976	0.231976
Ribosome.density..rb.kb.	u5T	-0.160214	0.160214
Ribosome.density..rb.kb.	u5G	-0.160512	0.160512
Ribosome.density..rb.kb.	u5AC	0.145653	0.145653
Ribosome.density..rb.kb.	u5TG	-0.229422	0.229422
Ribosome.density..rb.kb.	X5AUel	-0.144296	0.144296
Ribosome.density..rb.kb.	lcds	-0.553518	0.553518
Ribosome.density..rb.kb.	cdsA	-0.101138	0.101138
Ribosome.density..rb.kb.	cdsT	-0.131979	0.131979
Ribosome.density..rb.kb.	cdsG	0.236146	0.236146
Ribosome.density..rb.kb.	cdsAT	-0.294594	0.294594
Ribosome.density..rb.kb.	cdsAG	0.124156	0.124156
Ribosome.density..rb.kb.	cdsTG	0.178373	0.178373
Ribosome.density..rb.kb.	cdsAUel	-0.555839	0.555839
Ribosome.density..rb.kb.	lorf.x	-0.547142	0.547142
Ribosome.density..rb.kb.	nostems	-0.542938	0.542938
Ribosome.density..rb.kb.	relstems	0.381418	0.381418
Ribosome.density..rb.kb.	length	-0.548766	0.548766
Ribosome.density..rb.kb.	lu5.y	-0.145219	0.145219
Ribosome.density..rb.kb.	lorf.y	-0.555465	0.555465
Ribosome.density..rb.kb.	orfstems	0.186722	0.186722
Ribosome.density..rb.kb.	c5	-0.162247	0.162247
Ribosome.density..rb.kb.	co	-0.542713	0.542713
Ribosome.density..rb.kb.	orflength	-0.548963	0.548963
Ribosome.density..rb.kb.	score	-0.187434	0.187434
Ribosome.density..rb.kb.	energy	0.534915	0.534915
Ribosome.density..rb.kb.	CDS_AVG	0.212243	0.212243
Ribosome.density..rb.kb.	CDS_SDV	0.457981	0.457981
Ribosome.density..rb.kb.	CDS_RELSTDEV	-0.099648	0.099648
Ribosome.density..rb.kb.	CDS_LN	-0.557003	0.557003
Ribosome.density..rb.kb.	CDS_MIN	-0.126533	0.126533
Ribosome.density..rb.kb.	CDS_Q25	-0.384517	0.384517
Ribosome.density..rb.kb.	CDS_MEDIAN	0.299186	0.299186
Ribosome.density..rb.kb.	CDS_Q75	0.370449	0.370449
Ribosome.density..rb.kb.	CDS_MAX	0.203923	0.203923
Ribosome.density..rb.kb.	CDS_FIRST10_AVG	0.183082	0.183082
Ribosome.density..rb.kb.	CDS_FIRST10_SDV	0.293499	0.293499
Ribosome.density..rb.kb.	CDS_LAST10_AVG	0.144497	0.144497
Ribosome.density..rb.kb.	CDS_LAST10_SDV	0.18856	0.18856
Ribosome.density..rb.kb.	X5UTR_AVG	0.168218	0.168218
Ribosome.density..rb.kb.	X5UTR_SDV	0.30802	0.30802
Ribosome.density..rb.kb.	X5UTR_LN	-0.144982	0.144982
Ribosome.density..rb.kb.	X5UTR_MIN	-0.148702	0.148702
Ribosome.density..rb.kb.	X5UTR_Q25	-0.257655	0.257655
Ribosome.density..rb.kb.	X5UTR_Q75	0.221276	0.221276
Ribosome.density..rb.kb.	X5UTR_MAX	0.165993	0.165993
Ribosome.density..rb.kb.	X5UTR_FIRST10_AVG	0.179853	0.179853
Ribosome.density..rb.kb.	X5UTR_FIRST10_SDV	0.245131	0.245131
Ribosome.density..rb.kb.	X5UTR_LAST10_AVG	0.148776	0.148776
Ribosome.density..rb.kb.	X5UTR_LAST10_SDV	0.243998	0.243998
Ribosome.density..rb.kb.	X3UTR_AVG	0.138989	0.138989
Ribosome.density..rb.kb.	X3UTR_SDV	0.237075	0.237075
Ribosome.density..rb.kb.	X3UTR_MIN	-0.178989	0.178989
Ribosome.density..rb.kb.	X3UTR_Q23	-0.134745	0.134745
Ribosome.density..rb.kb.	X3UTR_Q73	0.206289	0.206289
Ribosome.density..rb.kb.	X3UTR_MAX	0.198905	0.198905
Ribosome.density..rb.kb.	X3UTR_FIRST10_AVG	0.169	0.169
Ribosome.density..rb.kb.	X3UTR_FIRST10_SDV	0.216297	0.216297
ORF.length..nt.	mRNA.level	-0.233598	0.233598
ORF.length..nt.	GO.0006412_PROTEIN_BIOSYNTHESIS	-0.142348	0.142348
ORF.length..nt.	er	0.110032	0.110032
ORF.length..nt.	MOLECULAR.WEIGHT..in.Daltons.	0.900254	0.900254
ORF.length..nt.	PI	-0.141357	0.141357
ORF.length..nt.	PROTEIN.LENGTH	0.900646	0.900646
ORF.length..nt.	ALA	0.76912	0.76912
ORF.length..nt.	ARG	0.731914	0.731914
ORF.length..nt.	ASN	0.813434	0.813434
ORF.length..nt.	ASP	0.797182	0.797182
ORF.length..nt.	CYS	0.568093	0.568093
ORF.length..nt.	GLN	0.749367	0.749367
ORF.length..nt.	GLU	0.763387	0.763387
ORF.length..nt.	GLY	0.770992	0.770992
ORF.length..nt.	HIS	0.709401	0.709401
ORF.length..nt.	ILE	0.822427	0.822427
ORF.length..nt.	LEU	0.83376	0.83376
ORF.length..nt.	LYS	0.75699	0.75699
ORF.length..nt.	MET	0.734692	0.734692
ORF.length..nt.	PHE	0.781321	0.781321
ORF.length..nt.	PRO	0.808444	0.808444
ORF.length..nt.	SER	0.824146	0.824146
ORF.length..nt.	THR	0.823902	0.823902
ORF.length..nt.	TRP	0.596038	0.596038
ORF.length..nt.	TYR	0.773713	0.773713
ORF.length..nt.	VAL	0.801608	0.801608
ORF.length..nt.	AROMATICITY.SCORE..Frequency.of.aromatic.amino.acids..Phe..Tyr..Trp.	0.11184	0.11184
ORF.length..nt.	lu5.x	0.221991	0.221991
ORF.length..nt.	u5A	-0.208513	0.208513
ORF.length..nt.	u5T	0.202302	0.202302
ORF.length..nt.	u5AC	-0.0997344	0.0997344
ORF.length..nt.	u5CT	0.139846	0.139846
ORF.length..nt.	u5TG	0.164857	0.164857
ORF.length..nt.	X5AUel	0.222115	0.222115
ORF.length..nt.	lcds	0.891206	0.891206
ORF.length..nt.	cdsT	0.234505	0.234505
ORF.length..nt.	cdsG	-0.238227	0.238227
ORF.length..nt.	cdsAT	0.237692	0.237692
ORF.length..nt.	cdsAG	-0.25049	0.25049
ORF.length..nt.	cdsAUel	0.900718	0.900718
ORF.length..nt.	lorf.x	0.877711	0.877711
ORF.length..nt.	nostems	0.880569	0.880569
ORF.length..nt.	relstems	-0.61642	0.61642
ORF.length..nt.	length	0.88469	0.88469
ORF.length..nt.	lu5.y	0.22094	0.22094
ORF.length..nt.	lorf.y	0.898675	0.898675
ORF.length..nt.	orfstems	-0.214942	0.214942
ORF.length..nt.	c5	0.214509	0.214509
ORF.length..nt.	co	0.890553	0.890553
ORF.length..nt.	orflength	0.885034	0.885034
ORF.length..nt.	score	0.481659	0.481659
ORF.length..nt.	energy	-0.880668	0.880668
ORF.length..nt.	CDS_SDV	-0.281686	0.281686
ORF.length..nt.	CDS_RELSTDEV	-0.156187	0.156187
ORF.length..nt.	CDS_LN	0.900645	0.900645
ORF.length..nt.	CDS_Q25	0.356506	0.356506
ORF.length..nt.	CDS_MEDIAN	-0.113335	0.113335
ORF.length..nt.	CDS_Q75	-0.143057	0.143057
ORF.length..nt.	CDS_FIRST10_SDV	-0.176453	0.176453
ORF.length..nt.	X5UTR_AVG	-0.120762	0.120762
ORF.length..nt.	X5UTR_SDV	-0.181276	0.181276
ORF.length..nt.	X5UTR_LN	0.220509	0.220509
ORF.length..nt.	X5UTR_Q25	0.221737	0.221737
ORF.length..nt.	X5UTR_FIRST10_AVG	-0.124036	0.124036
ORF.length..nt.	X5UTR_FIRST10_SDV	-0.175117	0.175117
ORF.length..nt.	X5UTR_LAST10_SDV	-0.139571	0.139571
ORF.length..nt.	X3UTR_SDV	-0.158337	0.158337
ORF.length..nt.	X3UTR_MIN	0.121644	0.121644
ORF.length..nt.	X3UTR_Q23	0.147197	0.147197
ORF.length..nt.	X3UTR_Q73	-0.164654	0.164654
ORF.length..nt.	X3UTR_MAX	-0.124394	0.124394
ORF.length..nt.	X3UTR_FIRST10_SDV	-0.107507	0.107507
mRNA.level	GO.0006412_PROTEIN_BIOSYNTHESIS	0.282732	0.282732
mRNA.level	GO.0008150_BIOLOGICAL_PROCESS	-0.134261	0.134261
mRNA.level	mito	-0.117562	0.117562
mRNA.level	MOLECULAR.WEIGHT..in.Daltons.	-0.262532	0.262532
mRNA.level	CAI..Codon.Adaptation.Index.	0.671474	0.671474
mRNA.level	PROTEIN.LENGTH	-0.252304	0.252304
mRNA.level	CODON.BIAS	0.665544	0.665544
mRNA.level	ARG	-0.23207	0.23207
mRNA.level	ASN	-0.335891	0.335891
mRNA.level	ASP	-0.230192	0.230192
mRNA.level	CYS	-0.251092	0.251092
mRNA.level	GLN	-0.248076	0.248076
mRNA.level	GLU	-0.177972	0.177972
mRNA.level	HIS	-0.276199	0.276199
mRNA.level	ILE	-0.251372	0.251372
mRNA.level	LEU	-0.300233	0.300233
mRNA.level	LYS	-0.162418	0.162418
mRNA.level	MET	-0.242075	0.242075
mRNA.level	PHE	-0.256017	0.256017
mRNA.level	PRO	-0.27178	0.27178
mRNA.level	SER	-0.317718	0.317718
mRNA.level	THR	-0.22811	0.22811
mRNA.level	TRP	-0.222163	0.222163
mRNA.level	TYR	-0.24861	0.24861
mRNA.level	VAL	-0.12721	0.12721
mRNA.level	FOP.SCORE..Frequency.of.Optimal.Codons.	0.667968	0.667968
mRNA.level	AROMATICITY.SCORE..Frequency.of.aromatic.amino.acids..Phe..Tyr..Trp.	-0.136259	0.136259
mRNA.level	u3C	-0.126058	0.126058
mRNA.level	u3T	0.140022	0.140022
mRNA.level	u3G	-0.140449	0.140449
mRNA.level	u3AT	0.098909	0.098909
mRNA.level	u5A	0.2181	0.2181
mRNA.level	u5T	-0.118112	0.118112
mRNA.level	u5G	-0.192835	0.192835
mRNA.level	u5AC	0.103435	0.103435
mRNA.level	u5TG	-0.208909	0.208909
mRNA.level	lcds	-0.251405	0.251405
mRNA.level	cdsA	-0.202601	0.202601
mRNA.level	cdsG	0.202654	0.202654
mRNA.level	cdsAT	-0.39047	0.39047
mRNA.level	cdsCT	0.162263	0.162263
mRNA.level	cdsCG	-0.116533	0.116533
mRNA.level	cdsTG	0.315054	0.315054
mRNA.level	cdsAUel	-0.250543	0.250543
mRNA.level	lorf.x	-0.250348	0.250348
mRNA.level	nostems	-0.240058	0.240058
mRNA.level	relstems	0.213493	0.213493
mRNA.level	length	-0.250372	0.250372
mRNA.level	lorf.y	-0.250086	0.250086
mRNA.level	orfstems	0.169482	0.169482
mRNA.level	c5	-0.104828	0.104828
mRNA.level	co	-0.23305	0.23305
mRNA.level	orflength	-0.249393	0.249393
mRNA.level	score	0.111459	0.111459
mRNA.level	energy	0.234218	0.234218
mRNA.level	CDS_AVG	0.623371	0.623371
mRNA.level	CDS_SDV	0.767553	0.767553
mRNA.level	CDS_RELSTDEV	-0.38082	0.38082
mRNA.level	CDS_LN	-0.252311	0.252311
mRNA.level	CDS_MIN	-0.449743	0.449743
mRNA.level	CDS_Q25	-0.614048	0.614048
mRNA.level	CDS_MEDIAN	0.646247	0.646247
mRNA.level	CDS_Q75	0.756873	0.756873
mRNA.level	CDS_MAX	0.617432	0.617432
mRNA.level	CDS_FIRST10_AVG	0.323727	0.323727
mRNA.level	CDS_FIRST10_SDV	0.509953	0.509953
mRNA.level	CDS_LAST10_AVG	0.328365	0.328365
mRNA.level	CDS_LAST10_SDV	0.402558	0.402558
mRNA.level	X5UTR_AVG	0.331161	0.331161
mRNA.level	X5UTR_SDV	0.554589	0.554589
mRNA.level	X5UTR_MIN	-0.38587	0.38587
mRNA.level	X5UTR_Q25	-0.399661	0.399661
mRNA.level	X5UTR_Q75	0.399313	0.399313
mRNA.level	X5UTR_MAX	0.403573	0.403573
mRNA.level	X5UTR_FIRST10_AVG	0.310451	0.310451
mRNA.level	X5UTR_FIRST10_SDV	0.423625	0.423625
mRNA.level	X5UTR_LAST10_AVG	0.283058	0.283058
mRNA.level	X5UTR_LAST10_SDV	0.454752	0.454752
mRNA.level	X3UTR_AVG	0.299976	0.299976
mRNA.level	X3UTR_SDV	0.494361	0.494361
[truncated: 3,743 more rows]

## Sheet: Dataset_S2
### results of Wilcoxon Rank Sum test, RBPs vs non-RBPs"
#feature	type	p
tfcode	less	0.165273
chromosome	greater	0.245674
strand	less	0.285781
start	less	0.095469
stop	less	0.0950539
protlength	less	0.0927943
pH	greater	3.24e-07
kDa	less	0.0997472
G	greater	0.778628
A	greater	0.0909558
L	less	6.56e-05
M	less	0.0106565
F	less	0.000163648
W	less	1.17e-12
K	greater	1.33e-08
Q	greater	0.0036641
E	greater	0.0144806
S	less	0.142653
P	greater	0.545028
V	less	0.23333
I	less	3.44e-05
C	less	2.9e-11
Y	less	1.14e-08
H	less	0.00122657
R	greater	1.85e-09
N	greater	0.0436381
D	less	0.261008
T	less	0.00193448
ncont	greater	1.22e-15
scont	less	5.43e-07
Number.of.introns	greater	1.71e-08
First.intron.length	greater	1.15e-08
First.intron.GC	greater	1.92e-08
mRNA.half.life.short	greater	0.249297
Ribosome.occupancy	less	0.342498
Ribosome.density..rb.kb.	less	0.165652
ORF.length..nt.	greater	0.54768
mRNA.level	greater	0.00225656
GO.0006259_DNA_METABOLISM	less	0.332207
GO.0006350_TRANSCRIPTION	greater	0.114231
GO.0006412_PROTEIN_BIOSYNTHESIS	greater	2.08e-13
GO.0006810_TRANSPORT	less	0.310884
GO.0007005_MITOCHONDRION_ORGANIZATION_AND_BIOGENESIS	two.sided	NaN
GO.0007049_CELL_CYCLE	less	0.313793
GO.0007165_SIGNAL_TRANSDUCTION	less	0.050563
GO.0008150_BIOLOGICAL_PROCESS	less	1.89e-05
GO.0016070_RNA_METABOLISM	greater	0
GO.0044238_PRIMARY_METABOLISM	two.sided	NaN
nuc	greater	0.0434627
vac	less	0.00166415
cyto	greater	0.100184
mito	less	0.00376151
er	less	0.00368555
MOLECULAR.WEIGHT..in.Daltons.	less	0.0997257
PI	greater	3.24e-07
CAI..Codon.Adaptation.Index.	greater	4.78e-07
PROTEIN.LENGTH	less	0.0927739
CODON.BIAS	greater	1.51e-05
ALA	less	0.442909
ARG	greater	0.000946614
ASN	greater	0.596291
ASP	less	0.118081
CYS	less	1.08e-07
GLN	greater	0.477068
GLU	greater	0.437688
GLY	less	0.12803
HIS	less	0.00997793
ILE	less	0.00271338
LEU	less	0.00186609
LYS	greater	0.0378604
MET	less	0.00775579
PHE	less	0.00824989
PRO	greater	0.811768
SER	greater	0.971104
THR	less	0.0093285
TRP	less	3.98e-08
TYR	less	0.000212152
VAL	less	0.0314639
FOP.SCORE..Frequency.of.Optimal.Codons.	greater	1.06e-05
GRAVY.SCORE..Hydropathicity.of.Protein.	less	7.84e-13
AROMATICITY.SCORE..Frequency.of.aromatic.amino.acids..Phe..Tyr..Trp.	less	5.18e-11
lu3.x	less	0.244922
u3A	greater	0.303982
u3C	less	0.148844
u3T	greater	0.0257147
u3G	less	0.00372137
u3AC	less	0.12358
u3AT	greater	0.521086
u3AG	less	0.00136747
u3CT	less	0.0670327
u3CG	less	0.00962512
u3TG	less	0.0484649
X3AUel	less	0.269903
lu5.x	greater	0.890005
u5A	greater	0.00698019
u5C	greater	0.114095
u5T	less	0.0576063
u5G	less	0.0185065
u5AC	less	0.497946
u5AT	greater	0.0572334
u5AG	less	0.502347
u5CT	less	0.0963111
u5CG	greater	0.257847
u5TG	less	0.0106545
X5AUel	greater	0.876478
lcds	less	0.0894109
cdsA	greater	6.97e-10
cdsC	greater	0.876292
cdsT	greater	0.999999
cdsG	greater	0.251794
cdsAC	less	0.0873888
cdsAT	greater	0.996661
cdsAG	greater	2.1e-12
cdsCT	greater	0.948058
cdsCG	less	0.000566715
cdsTG	greater	0.999941
cdsAUel	less	0.097269
lorf.x	less	0.08035
nostems	greater	0.287812
relstems	greater	0.376263
length.x	greater	0.287812
lu3.y	less	0.234322
lu5.y	greater	0.871557
lorf.y	less	0.0963656
relnostems	greater	0.0615226
X3stems	greater	0.203663
X5stems	greater	0.0484628
orfstems	greater	0.042281
c3	greater	0.287561
c5	greater	0.287916
co	greater	0.287791
length.y	less	0.0840878
score	less	0.497458
energy	greater	0.0318173
lu3rel	less	0.203234

## Sheet: Dataset_S2b
### results of Wilcoxon Rank Sum test, hogan protein vs other RBPs
	type	p	meand
tfcode	two.sided	NaN	0
chromosome	less	0.42421	-0.133333
strand	greater	0.15102	0.142857
start	less	0.309965	-31553.5
stop	less	0.304388	-32232.8
protlength	greater	0.00174882	237.714
pH	less	0.00902082	-1.62324
kDa	greater	0.00196047	25.9602
G	less	0.62001	-0.00151633
A	less	0.178658	-0.00852237
L	less	0.0205097	-0.0106308
M	greater	0.193534	0.00120574
F	greater	0.354589	0.00248542
W	less	0.232066	-0.00199146
K	less	0.000100536	-0.0325928
Q	greater	0.0830668	0.0166345
E	less	0.379989	-0.00337802
S	greater	0.02051	0.0169625
P	greater	0.000682565	0.0172848
V	less	0.000804492	-0.0165726
I	greater	0.354589	0.00200179
C	greater	0.0928076	0.00301948
Y	greater	0.170488	0.00165496
H	greater	0.0075036	0.00560954
R	less	0.040771	-0.0112161
N	greater	0.000761817	0.0228936
D	greater	0.383015	0.00200295
T	less	0.236334	-0.00318189
ncont	less	0.203486	-0.0153325
scont	greater	0.100697	0.00422522
Number.of.introns	less	0.0172103	-0.238095
First.intron.length	less	0.0180379	-64492.6
First.intron.GC	less	0.0180379	-0.0911237
mRNA.half.life.short	greater	0.196109	0.114286
Ribosome.occupancy	less	0.406119	-0.223508
Ribosome.density..rb.kb.	less	0.00384049	-0.205633
ORF.length..nt.	greater	0.0223395	553.768
mRNA.level	less	0.0239427	-6.02981
GO.0006259_DNA_METABOLISM	two.sided	NaN	0
GO.0006350_TRANSCRIPTION	greater	0.0846636	0.114286
GO.0006412_PROTEIN_BIOSYNTHESIS	less	0.020625	-0.257143
GO.0006810_TRANSPORT	greater	0.174886	0.0857143
GO.0007005_MITOCHONDRION_ORGANIZATION_AND_BIOGENESIS	two.sided	NaN	0
GO.0007049_CELL_CYCLE	two.sided	NaN	0
GO.0007165_SIGNAL_TRANSDUCTION	two.sided	NaN	0
GO.0008150_BIOLOGICAL_PROCESS	less	0.352728	-0.00952381
GO.0016070_RNA_METABOLISM	greater	0.393088	0.0285714
GO.0044238_PRIMARY_METABOLISM	two.sided	NaN	0
nuc	greater	0.399963	0.0361664
vac	two.sided	NaN	0
cyto	greater	0.336262	0.0605787
mito	less	0.195996	-0.0506329
er	greater	0.379307	0.0289331
MOLECULAR.WEIGHT..in.Daltons.	greater	0.00196047	25960.2
PI	less	0.00902082	-1.62324
CAI..Codon.Adaptation.Index.	less	0.058066	-0.114371
PROTEIN.LENGTH	greater	0.00174882	237.714
CODON.BIAS	less	0.110096	-0.125581
ALA	greater	0.00807544	14.8476
ARG	greater	0.0324512	7.1619
ASN	greater	0.000397632	27.0571
ASP	greater	0.00282672	10.4857
CYS	greater	0.00444427	2.2381
GLN	greater	0.00160366	20.781
GLU	greater	0.0191263	11.5714
GLY	greater	0.00143297	13.581
HIS	greater	0.000428133	8.32381
ILE	greater	0.00231206	13.181
LEU	greater	0.0149596	12.3905
LYS	greater	0.180606	6.90476
MET	greater	0.00194315	5.68571
PHE	greater	0.0026865	7.00952
PRO	greater	0.00013383	22.0857
SER	greater	0.000903422	28.6762
THR	greater	0.00737707	11.1619
TRP	less	0.735968	-0.180952
TYR	greater	0.0018133	6.7619
VAL	greater	0.0442573	7.99048
FOP.SCORE..Frequency.of.Optimal.Codons.	less	0.0754577	-0.0753048
GRAVY.SCORE..Hydropathicity.of.Protein.	less	0.0474233	-0.111318
AROMATICITY.SCORE..Frequency.of.aromatic.amino.acids..Phe..Tyr..Trp.	greater	0.473112	0.00202738
lu3.x	greater	0.0414596	55.1143
u3A	less	0.03873	-0.0408849
u3C	greater	0.000826613	0.0462879
u3T	greater	0.188138	0.0159756
u3G	less	0.0348977	-0.0215901
u3AC	greater	0.0110281	0.0131035
u3AT	less	0.0316631	-0.0158628
u3AG	less	0.0358047	-0.00935207
u3CT	greater	0.00297621	0.0257786
u3CG	less	0.437928	-0.00182997
u3TG	greater	0.372454	6.08651e-05
X3AUel	greater	0.0436196	52.3238
lu5.x	greater	0.00741268	59.5143
u5A	less	0.0032053	-0.0816516
u5C	greater	0.184932	0.0135569
u5T	greater	0.00741433	0.0745267
u5G	less	0.287919	-0.006432
u5AC	less	0.238632	-0.00985473
u5AT	less	0.192427	-0.00383787
u5AG	less	0.157703	-0.0101195
u5CT	greater	0.0111443	0.0200354
u5CG	less	0.386052	-0.00260264
u5TG	greater	0.262534	0.00279079
X5AUel	greater	0.00725165	59.6667
lcds	greater	0.00161977	721.733
cdsA	less	0.0932149	-3.09012
cdsC	less	0.997485	-1.47217
cdsT	less	0.573965	-2.45158
cdsG	less	0.00328578	-1.74874
cdsAC	less	0.963859	-0.366014
cdsAT	less	0.957099	-0.789438
cdsAG	less	0.000474857	-0.707861
cdsCT	less	0.488922	-0.429048
cdsCG	less	0.989198	-0.186392
cdsTG	less	0.20125	-0.564034
cdsAUel	greater	0.00174908	708.238
lorf.x	greater	0.00162009	836.362
nostems	less	0.422926	-4018.5
relstems	less	0.0261802	-0.00261592
length.x	less	0.422926	-68321.8
lu3.y	greater	0.0414593	55.0857
lu5.y	greater	0.00749477	59.3238
lorf.y	greater	0.00174882	713.143
relnostems	less	0.0149928	-48.816
X3stems	less	0.114646	-21.8459
X5stems	less	0.0175675	-120.954
orfstems	less	0.0101421	-61.9811
c3	less	0.422926	-124.81
c5	less	0.422926	-320.657
co	less	0.422926	-3381.38
length.y	greater	0.00174916	827.552
score	greater	0.0213084	366.505
energy	less	0.00206161	-199.3
lu3rel	greater	0.0918996	0.000127273

## Sheet: DS3
DS3 is available as a separate file

## Sheet: Dataset_S4
### Correlations between features of the proteins and mRNA targets in Hogan et al.
chromosome1	strand1	0.423306	0.423306
chromosome1	protlength1	0.152908	0.152908
chromosome1	pH1	0.139872	0.139872
chromosome1	kDa1	0.147469	0.147469
chromosome1	G1	-0.616607	0.616607
chromosome1	A1	-0.374702	0.374702
chromosome1	L1	0.401636	0.401636
chromosome1	F1	-0.475077	0.475077
chromosome1	W1	0.13795	0.13795
chromosome1	K1	0.167685	0.167685
chromosome1	Q1	0.527089	0.527089
chromosome1	E1	-0.143351	0.143351
chromosome1	P1	-0.103231	0.103231
chromosome1	V1	0.268238	0.268238
chromosome1	I1	0.420224	0.420224
chromosome1	C1	0.101179	0.101179
chromosome1	Y1	-0.33369	0.33369
chromosome1	H1	-0.169097	0.169097
chromosome1	R1	-0.199816	0.199816
chromosome1	N1	0.577203	0.577203
chromosome1	D1	0.587736	0.587736
chromosome1	T1	0.171288	0.171288
chromosome1	ncont1	0.316208	0.316208
chromosome1	mRNA.half.life.short1	-0.22259	0.22259
chromosome1	Ribosome.occupancy1	0.289645	0.289645
chromosome1	Ribosome.density..rb.kb.1	-0.358636	0.358636
chromosome1	ORF.length..nt.1	0.152908	0.152908
chromosome1	GO.0006350_TRANSCRIPTION1	0.0874796	0.0874796
chromosome1	GO.0006412_PROTEIN_BIOSYNTHESIS1	-0.410036	0.410036
chromosome1	GO.0008150_BIOLOGICAL_PROCESS1	0.281869	0.281869
chromosome1	cyto1	-0.0883532	0.0883532
chromosome1	MOLECULAR.WEIGHT..in.Daltons.	0.147469	0.147469
chromosome1	PI	0.139872	0.139872
chromosome1	CAI..Codon.Adaptation.Index.	-0.333094	0.333094
chromosome1	PROTEIN.LENGTH	0.152908	0.152908
chromosome1	CODON.BIAS	-0.457552	0.457552
chromosome1	ALA	-0.124286	0.124286
chromosome1	ARG	-0.31625	0.31625
chromosome1	ASN	0.309321	0.309321
chromosome1	ASP	0.318141	0.318141
chromosome1	GLN	0.423241	0.423241
chromosome1	GLU	-0.218125	0.218125
chromosome1	GLY	-0.533314	0.533314
chromosome1	HIS	-0.176309	0.176309
chromosome1	ILE	0.274426	0.274426
chromosome1	LEU	0.282557	0.282557
chromosome1	LYS	0.116437	0.116437
chromosome1	PHE	-0.26011	0.26011
chromosome1	PRO	-0.211201	0.211201
chromosome1	THR	0.114205	0.114205
chromosome1	TRP	0.189393	0.189393
chromosome1	TYR	-0.150642	0.150642
chromosome1	VAL	0.133993	0.133993
chromosome1	FOP.SCORE..Frequency.of.Optimal.Codons.	-0.454729	0.454729
chromosome1	AROMATICITY.SCORE..Frequency.of.aromatic.amino.acids..Phe..Tyr..Trp.	-0.348987	0.348987
chromosome1	econt	-0.342801	0.342801
chromosome1	ccont	-0.125329	0.125329
chromosome1	hcont	0.313628	0.313628
chromosome1	econtrel	-0.344282	0.344282
chromosome1	ccontrel	-0.123041	0.123041
chromosome1	hcontrel	0.286413	0.286413
chromosome1	protlength2	0.205343	0.205343
chromosome1	kDa2	0.20639	0.20639
chromosome1	F2	0.100532	0.100532
chromosome1	R2	-0.0977487	0.0977487
chromosome1	ncont2	-0.098855	0.098855
chromosome1	Ribosome.occupancy2	-0.0941198	0.0941198
chromosome1	ORF.length..nt.2	0.202678	0.202678
chromosome1	relinstems	0.092859	0.092859
chromosome1	length	0.206366	0.206366
chromosome1	nstems	0.202889	0.202889
chromosome1	lu5	0.0839296	0.0839296
chromosome1	u5T	0.0831409	0.0831409
chromosome1	X5AUel	0.083642	0.083642
chromosome1	lcds	0.205343	0.205343
chromosome1	cdsT	0.161682	0.161682
chromosome1	cdsG	-0.0832236	0.0832236
chromosome1	cdsAT	0.113632	0.113632
chromosome1	cdsAG	-0.136995	0.136995
chromosome1	cdsAUel	0.204982	0.204982
chromosome1	ene	-0.201981	0.201981
chromosome1	nostems	0.206465	0.206465
chromosome1	relstems	-0.164334	0.164334
chromosome1	length.1	0.209771	0.209771
chromosome1	lu5.1	0.0839296	0.0839296
chromosome1	lorf.1	0.205343	0.205343
strand1	start1	-0.19088	0.19088
strand1	stop1	-0.19088	0.19088
strand1	protlength1	0.345414	0.345414
strand1	pH1	0.223917	0.223917
strand1	kDa1	0.332008	0.332008
strand1	G1	-0.528227	0.528227
strand1	A1	-0.292531	0.292531
strand1	L1	0.380887	0.380887
strand1	M1	-0.53588	0.53588
strand1	F1	-0.580608	0.580608
strand1	K1	0.53011	0.53011
strand1	Q1	-0.233062	0.233062
strand1	E1	0.363523	0.363523
strand1	S1	0.268687	0.268687
strand1	P1	-0.427697	0.427697
strand1	V1	0.313592	0.313592
strand1	I1	0.487139	0.487139
strand1	C1	-0.293563	0.293563
strand1	Y1	-0.548745	0.548745
strand1	H1	-0.495842	0.495842
strand1	D1	0.488244	0.488244
strand1	T1	0.554972	0.554972
strand1	ncont1	-0.116071	0.116071
strand1	scont1	-0.552041	0.552041
strand1	Number.of.introns1	-0.13372	0.13372
strand1	First.intron.length1	-0.133713	0.133713
strand1	First.intron.GC1	-0.133713	0.133713
strand1	mRNA.half.life.short1	-0.595893	0.595893
strand1	Ribosome.occupancy1	-0.297085	0.297085
strand1	Ribosome.density..rb.kb.1	-0.555633	0.555633
strand1	ORF.length..nt.1	0.345414	0.345414
strand1	GO.0006350_TRANSCRIPTION1	0.471786	0.471786
strand1	GO.0006412_PROTEIN_BIOSYNTHESIS1	-0.395598	0.395598
strand1	GO.0008150_BIOLOGICAL_PROCESS1	0.20455	0.20455
strand1	cyto1	-0.604735	0.604735
strand1	er1	0.257616	0.257616
strand1	MOLECULAR.WEIGHT..in.Daltons.	0.332008	0.332008
strand1	PI	0.223917	0.223917
strand1	PROTEIN.LENGTH	0.345414	0.345414
strand1	CODON.BIAS	-0.131792	0.131792
strand1	ALA	0.101488	0.101488
strand1	ARG	0.474285	0.474285
strand1	ASN	0.218546	0.218546
strand1	ASP	0.697615	0.697615
strand1	GLN	-0.187831	0.187831
strand1	GLU	0.4211	0.4211
strand1	ILE	0.528921	0.528921
strand1	LEU	0.487429	0.487429
strand1	LYS	0.528759	0.528759
strand1	MET	-0.410217	0.410217
strand1	SER	0.309408	0.309408
strand1	THR	0.466234	0.466234
strand1	TRP	0.168166	0.168166
strand1	TYR	0.104189	0.104189
strand1	VAL	0.312827	0.312827
strand1	FOP.SCORE..Frequency.of.Optimal.Codons.	-0.129308	0.129308
strand1	AROMATICITY.SCORE..Frequency.of.aromatic.amino.acids..Phe..Tyr..Trp.	-0.554896	0.554896
strand1	ccont	0.156534	0.156534
strand1	hcont	0.580323	0.580323
strand1	econtrel	-0.372877	0.372877
strand1	ccontrel	-0.29296	0.29296
strand1	hcontrel	0.476241	0.476241
strand1	protlength2	0.233394	0.233394
strand1	pH2	-0.103415	0.103415
strand1	kDa2	0.233794	0.233794
strand1	D2	0.107148	0.107148
strand1	Number.of.introns2	-0.129327	0.129327
strand1	First.intron.length2	-0.129499	0.129499
strand1	First.intron.GC2	-0.126538	0.126538
strand1	ORF.length..nt.2	0.227737	0.227737
strand1	length	0.217351	0.217351
strand1	nstems	0.219546	0.219546
strand1	lcds	0.233394	0.233394
strand1	cdsC	-0.103172	0.103172
strand1	cdsAUel	0.233121	0.233121
strand1	ene	-0.226378	0.226378
strand1	nostems	0.229429	0.229429
strand1	relstems	-0.162898	0.162898
strand1	length.1	0.224868	0.224868
strand1	lorf.1	0.233394	0.233394
start1	stop1	1	1
start1	protlength1	-0.498636	0.498636
start1	pH1	-0.213465	0.213465
start1	kDa1	-0.491988	0.491988
start1	G1	0.248257	0.248257
start1	A1	-0.384863	0.384863
start1	L1	-0.305928	0.305928
start1	M1	-0.266692	0.266692
start1	K1	-0.101843	0.101843
start1	Q1	0.23206	0.23206
start1	E1	0.438435	0.438435
start1	S1	-0.340158	0.340158
start1	V1	-0.25903	0.25903
start1	I1	-0.53612	0.53612
start1	C1	-0.593402	0.593402
start1	R1	0.302031	0.302031
start1	N1	-0.251705	0.251705
start1	T1	-0.599559	0.599559
start1	ncont1	0.476861	0.476861
start1	scont1	-0.306019	0.306019
start1	Number.of.introns1	-0.136544	0.136544
start1	First.intron.length1	-0.136691	0.136691
start1	First.intron.GC1	-0.135456	0.135456
start1	mRNA.half.life.short1	0.109813	0.109813
start1	Ribosome.occupancy1	0.431923	0.431923
start1	Ribosome.density..rb.kb.1	0.499992	0.499992
start1	ORF.length..nt.1	-0.499004	0.499004
start1	GO.0006350_TRANSCRIPTION1	-0.573754	0.573754
start1	GO.0008150_BIOLOGICAL_PROCESS1	-0.227735	0.227735
start1	cyto1	-0.128919	0.128919
start1	MOLECULAR.WEIGHT..in.Daltons.	-0.491988	0.491988
start1	PI	-0.213465	0.213465
start1	CAI..Codon.Adaptation.Index.	0.510507	0.510507
start1	PROTEIN.LENGTH	-0.498636	0.498636
start1	CODON.BIAS	0.552817	0.552817
start1	ALA	-0.570977	0.570977
start1	ARG	-0.215652	0.215652
start1	ASN	-0.498473	0.498473
start1	ASP	-0.423533	0.423533
start1	CYS	-0.71368	0.71368
start1	HIS	-0.396807	0.396807
start1	ILE	-0.633198	0.633198
start1	LEU	-0.432331	0.432331
start1	LYS	-0.251917	0.251917
start1	MET	-0.269873	0.269873
start1	PHE	-0.397278	0.397278
start1	PRO	-0.315533	0.315533
start1	SER	-0.468874	0.468874
start1	THR	-0.682354	0.682354
start1	TRP	-0.262298	0.262298
start1	TYR	-0.435352	0.435352
start1	VAL	-0.474827	0.474827
start1	FOP.SCORE..Frequency.of.Optimal.Codons.	0.552534	0.552534
start1	GRAVY.SCORE..Hydropathicity.of.Protein.	-0.763247	0.763247
start1	econt	-0.276523	0.276523
start1	ccont	-0.481114	0.481114
start1	hcont	-0.362059	0.362059
start1	econtrel	-0.166972	0.166972
start1	ccontrel	0.0870763	0.0870763
start1	hcontrel	-0.171742	0.171742
stop1	protlength1	-0.498636	0.498636
stop1	pH1	-0.213465	0.213465
stop1	kDa1	-0.491988	0.491988
stop1	G1	0.248257	0.248257
stop1	A1	-0.384863	0.384863
stop1	L1	-0.305928	0.305928
stop1	M1	-0.266692	0.266692
stop1	K1	-0.101843	0.101843
stop1	Q1	0.23206	0.23206
stop1	E1	0.438435	0.438435
stop1	S1	-0.340158	0.340158
stop1	V1	-0.25903	0.25903
stop1	I1	-0.53612	0.53612
stop1	C1	-0.593402	0.593402
stop1	R1	0.302031	0.302031
stop1	N1	-0.251705	0.251705
stop1	T1	-0.599559	0.599559
stop1	ncont1	0.476861	0.476861
stop1	scont1	-0.306019	0.306019
stop1	Number.of.introns1	-0.136544	0.136544
stop1	First.intron.length1	-0.136691	0.136691
stop1	First.intron.GC1	-0.135456	0.135456
stop1	mRNA.half.life.short1	0.109813	0.109813
stop1	Ribosome.occupancy1	0.431923	0.431923
stop1	Ribosome.density..rb.kb.1	0.499992	0.499992
stop1	ORF.length..nt.1	-0.499004	0.499004
stop1	GO.0006350_TRANSCRIPTION1	-0.573754	0.573754
stop1	GO.0008150_BIOLOGICAL_PROCESS1	-0.227735	0.227735
stop1	cyto1	-0.128919	0.128919
stop1	MOLECULAR.WEIGHT..in.Daltons.	-0.491988	0.491988
stop1	PI	-0.213465	0.213465
stop1	CAI..Codon.Adaptation.Index.	0.510507	0.510507
stop1	PROTEIN.LENGTH	-0.498636	0.498636
stop1	CODON.BIAS	0.552817	0.552817
stop1	ALA	-0.570977	0.570977
stop1	ARG	-0.215652	0.215652
stop1	ASN	-0.498473	0.498473
stop1	ASP	-0.423533	0.423533
stop1	CYS	-0.71368	0.71368
stop1	HIS	-0.396807	0.396807
stop1	ILE	-0.633198	0.633198
stop1	LEU	-0.432331	0.432331
stop1	LYS	-0.251917	0.251917
stop1	MET	-0.269873	0.269873
stop1	PHE	-0.397278	0.397278
stop1	PRO	-0.315533	0.315533
stop1	SER	-0.468874	0.468874
stop1	THR	-0.682354	0.682354
stop1	TRP	-0.262298	0.262298
stop1	TYR	-0.435352	0.435352
stop1	VAL	-0.474827	0.474827
stop1	FOP.SCORE..Frequency.of.Optimal.Codons.	0.552534	0.552534
stop1	GRAVY.SCORE..Hydropathicity.of.Protein.	-0.763247	0.763247
stop1	econt	-0.276523	0.276523
stop1	ccont	-0.481114	0.481114
stop1	hcont	-0.362059	0.362059
stop1	econtrel	-0.166972	0.166972
stop1	ccontrel	0.0870763	0.0870763
stop1	hcontrel	-0.171742	0.171742
protlength1	pH1	0.267924	0.267924
protlength1	kDa1	0.998399	0.998399
protlength1	G1	-0.500415	0.500415
protlength1	A1	0.408782	0.408782
protlength1	L1	0.530251	0.530251
protlength1	M1	0.164871	0.164871
protlength1	F1	-0.16537	0.16537
protlength1	K1	0.420001	0.420001
protlength1	Q1	-0.128035	0.128035
protlength1	E1	-0.172711	0.172711
protlength1	S1	0.139103	0.139103
protlength1	P1	-0.108619	0.108619
protlength1	V1	0.416921	0.416921
protlength1	I1	0.474872	0.474872
protlength1	C1	0.117161	0.117161
protlength1	H1	-0.11692	0.11692
protlength1	R1	-0.61058	0.61058
protlength1	N1	0.101915	0.101915
protlength1	D1	-0.172403	0.172403
protlength1	T1	0.608544	0.608544
protlength1	ncont1	-0.526373	0.526373
protlength1	scont1	0.120254	0.120254
protlength1	mRNA.half.life.short1	-0.33135	0.33135
protlength1	Ribosome.occupancy1	-0.372657	0.372657
protlength1	Ribosome.density..rb.kb.1	-0.437092	0.437092
protlength1	ORF.length..nt.1	0.999631	0.999631
protlength1	GO.0006350_TRANSCRIPTION1	0.635312	0.635312
protlength1	GO.0006412_PROTEIN_BIOSYNTHESIS1	0.257547	0.257547
protlength1	GO.0008150_BIOLOGICAL_PROCESS1	0.177337	0.177337
protlength1	er1	0.544351	0.544351
protlength1	MOLECULAR.WEIGHT..in.Daltons.	0.998399	0.998399
protlength1	PI	0.267924	0.267924
protlength1	CAI..Codon.Adaptation.Index.	-0.091017	0.091017
protlength1	PROTEIN.LENGTH	1	1
protlength1	CODON.BIAS	-0.148188	0.148188
protlength1	ALA	0.848676	0.848676
protlength1	ARG	0.445261	0.445261
protlength1	ASN	0.75661	0.75661
protlength1	ASP	0.810307	0.810307
protlength1	CYS	0.580359	0.580359
protlength1	GLN	0.270542	0.270542
protlength1	GLU	0.495973	0.495973
protlength1	GLY	0.366994	0.366994
protlength1	HIS	0.693255	0.693255
protlength1	ILE	0.801032	0.801032
protlength1	LEU	0.833344	0.833344
protlength1	LYS	0.723414	0.723414
protlength1	MET	0.417957	0.417957
protlength1	PHE	0.712358	0.712358
protlength1	PRO	0.618517	0.618517
protlength1	SER	0.702706	0.702706
protlength1	THR	0.874988	0.874988
protlength1	TRP	0.30587	0.30587
protlength1	TYR	0.834318	0.834318
protlength1	VAL	0.944987	0.944987
protlength1	FOP.SCORE..Frequency.of.Optimal.Codons.	-0.141935	0.141935
protlength1	GRAVY.SCORE..Hydropathicity.of.Protein.	0.648179	0.648179
protlength1	AROMATICITY.SCORE..Frequency.of.aromatic.amino.acids..Phe..Tyr..Trp.	-0.187217	0.187217
protlength1	econt	0.470062	0.470062
protlength1	ccont	0.778224	0.778224
protlength1	hcont	0.793985	0.793985
protlength1	econtrel	0.0914604	0.0914604
protlength1	ccontrel	-0.358882	0.358882
protlength1	hcontrel	0.521498	0.521498
protlength1	protlength2	0.180929	0.180929
protlength1	kDa2	0.180566	0.180566
protlength1	ORF.length..nt.2	0.182455	0.182455
protlength1	relinstems	0.105096	0.105096
protlength1	length	0.184083	0.184083
protlength1	nstems	0.18228	0.18228
protlength1	lcds	0.180929	0.180929
protlength1	cdsT	0.122997	0.122997
protlength1	cdsAG	-0.0877899	0.0877899
protlength1	cdsAUel	0.180702	0.180702
protlength1	ene	-0.175334	0.175334
protlength1	nostems	0.1773	0.1773
protlength1	relstems	-0.135801	0.135801
protlength1	length.1	0.178314	0.178314
protlength1	lorf.1	0.180929	0.180929
pH1	kDa1	0.274566	0.274566
pH1	G1	-0.563445	0.563445
pH1	A1	-0.145986	0.145986
pH1	L1	0.812379	0.812379
pH1	M1	-0.378792	0.378792
pH1	F1	-0.365313	0.365313
pH1	W1	-0.4877	0.4877
pH1	K1	0.507539	0.507539
pH1	S1	-0.239837	0.239837
pH1	P1	-0.336378	0.336378
pH1	V1	0.175446	0.175446
pH1	I1	0.392068	0.392068
pH1	H1	-0.0932362	0.0932362
pH1	R1	0.10746	0.10746
pH1	D1	0.109577	0.109577
pH1	T1	0.490494	0.490494
pH1	ncont1	0.228103	0.228103
pH1	scont1	-0.299533	0.299533
pH1	Number.of.introns1	0.161582	0.161582
pH1	First.intron.length1	0.162074	0.162074
pH1	First.intron.GC1	0.161875	0.161875
pH1	mRNA.half.life.short1	-0.355966	0.355966
pH1	Ribosome.occupancy1	0.0899654	0.0899654
pH1	Ribosome.density..rb.kb.1	-0.348235	0.348235
pH1	ORF.length..nt.1	0.265121	0.265121
pH1	GO.0006412_PROTEIN_BIOSYNTHESIS1	0.126766	0.126766
pH1	cyto1	-0.124146	0.124146
pH1	er1	0.352844	0.352844
pH1	MOLECULAR.WEIGHT..in.Daltons.	0.274566	0.274566
pH1	PI	1	1
pH1	PROTEIN.LENGTH	0.267924	0.267924
pH1	CODON.BIAS	-0.112718	0.112718
pH1	ASP	0.394529	0.394529
pH1	CYS	0.0994919	0.0994919
pH1	GLY	-0.42233	0.42233
pH1	ILE	0.43944	0.43944
pH1	LEU	0.58239	0.58239
pH1	LYS	0.463048	0.463048
pH1	MET	-0.387049	0.387049
pH1	PHE	-0.252233	0.252233
pH1	PRO	-0.11972	0.11972
pH1	SER	-0.0973904	0.0973904
pH1	THR	0.337929	0.337929
pH1	TRP	-0.29925	0.29925
pH1	VAL	0.293215	0.293215
pH1	FOP.SCORE..Frequency.of.Optimal.Codons.	-0.113613	0.113613
pH1	GRAVY.SCORE..Hydropathicity.of.Protein.	0.277336	0.277336
pH1	AROMATICITY.SCORE..Frequency.of.aromatic.amino.acids..Phe..Tyr..Trp.	-0.333553	0.333553
pH1	econt	-0.376813	0.376813
pH1	ccont	-0.10141	0.10141
pH1	hcont	0.512173	0.512173
pH1	econtrel	-0.395404	0.395404
pH1	ccontrel	-0.424872	0.424872
pH1	hcontrel	0.660625	0.660625
pH1	protlength2	0.179643	0.179643
pH1	kDa2	0.179091	0.179091
pH1	Ribosome.occupancy2	-0.0963214	0.0963214
pH1	ORF.length..nt.2	0.18066	0.18066
pH1	length	0.175713	0.175713
pH1	nstems	0.173339	0.173339
pH1	lcds	0.179643	0.179643
pH1	cdsG	-0.086724	0.086724
pH1	cdsAUel	0.179593	0.179593
pH1	ene	-0.168279	0.168279
pH1	nostems	0.174943	0.174943
pH1	relstems	-0.129564	0.129564
pH1	length.1	0.179176	0.179176
pH1	lorf.1	0.179643	0.179643
kDa1	G1	-0.500467	0.500467
kDa1	A1	0.40467	0.40467
kDa1	L1	0.5363	0.5363
kDa1	M1	0.164038	0.164038
kDa1	F1	-0.160637	0.160637
kDa1	W1	-0.0913802	0.0913802
kDa1	K1	0.403886	0.403886
kDa1	Q1	-0.113658	0.113658
kDa1	E1	-0.172778	0.172778
kDa1	S1	0.118101	0.118101
kDa1	P1	-0.0919962	0.0919962
kDa1	V1	0.423323	0.423323
kDa1	I1	0.472591	0.472591
kDa1	C1	0.109623	0.109623
kDa1	H1	-0.0903228	0.0903228
kDa1	R1	-0.609111	0.609111
kDa1	N1	0.0987977	0.0987977
kDa1	D1	-0.187788	0.187788
kDa1	T1	0.59909	0.59909
kDa1	ncont1	-0.505582	0.505582
kDa1	scont1	0.117735	0.117735
kDa1	mRNA.half.life.short1	-0.348592	0.348592
kDa1	Ribosome.occupancy1	-0.34586	0.34586
kDa1	Ribosome.density..rb.kb.1	-0.432928	0.432928
kDa1	ORF.length..nt.1	0.998031	0.998031
kDa1	GO.0006350_TRANSCRIPTION1	0.634552	0.634552
kDa1	GO.0006412_PROTEIN_BIOSYNTHESIS1	0.257258	0.257258
kDa1	GO.0008150_BIOLOGICAL_PROCESS1	0.177138	0.177138
kDa1	er1	0.548355	0.548355
kDa1	MOLECULAR.WEIGHT..in.Daltons.	1	1
kDa1	PI	0.274566	0.274566
kDa1	CAI..Codon.Adaptation.Index.	-0.096786	0.096786
kDa1	PROTEIN.LENGTH	0.998399	0.998399
kDa1	CODON.BIAS	-0.150117	0.150117
kDa1	ALA	0.843063	0.843063
kDa1	ARG	0.447761	0.447761
kDa1	ASN	0.75274	0.75274
kDa1	ASP	0.805347	0.805347
kDa1	CYS	0.572719	0.572719
kDa1	GLN	0.276414	0.276414
kDa1	GLU	0.486876	0.486876
kDa1	GLY	0.374552	0.374552
kDa1	HIS	0.711134	0.711134
kDa1	ILE	0.798296	0.798296
kDa1	LEU	0.837815	0.837815
kDa1	LYS	0.712988	0.712988
kDa1	MET	0.417952	0.417952
kDa1	PHE	0.717239	0.717239
kDa1	PRO	0.630542	0.630542
kDa1	SER	0.679774	0.679774
kDa1	THR	0.867774	0.867774
kDa1	TRP	0.296698	0.296698
kDa1	TYR	0.845761	0.845761
kDa1	VAL	0.949041	0.949041
kDa1	FOP.SCORE..Frequency.of.Optimal.Codons.	-0.143738	0.143738
kDa1	GRAVY.SCORE..Hydropathicity.of.Protein.	0.648596	0.648596
kDa1	AROMATICITY.SCORE..Frequency.of.aromatic.amino.acids..Phe..Tyr..Trp.	-0.172134	0.172134
kDa1	econt	0.466459	0.466459
kDa1	ccont	0.77947	0.77947
kDa1	hcont	0.792965	0.792965
kDa1	econtrel	0.0865373	0.0865373
kDa1	ccontrel	-0.358908	0.358908
kDa1	hcontrel	0.51747	0.51747
kDa1	protlength2	0.184261	0.184261
kDa1	kDa2	0.183957	0.183957
kDa1	ORF.length..nt.2	0.185761	0.185761
kDa1	relinstems	0.103545	0.103545
kDa1	length	0.187416	0.187416
kDa1	nstems	0.185259	0.185259
kDa1	lcds	0.184261	0.184261
kDa1	cdsT	0.125068	0.125068
kDa1	cdsAG	-0.0901026	0.0901026
kDa1	cdsAUel	0.184028	0.184028
kDa1	ene	-0.178131	0.178131
kDa1	nostems	0.180497	0.180497
kDa1	relstems	-0.137801	0.137801
kDa1	length.1	0.181814	0.181814
kDa1	lorf.1	0.184261	0.184261
G1	A1	0.174268	0.174268
G1	L1	-0.827699	0.827699
G1	M1	0.272928	0.272928
G1	F1	0.72412	0.72412
G1	W1	0.170385	0.170385
G1	K1	-0.60134	0.60134
G1	Q1	-0.132328	0.132328
G1	P1	0.428482	0.428482
G1	V1	-0.537249	0.537249
G1	I1	-0.821794	0.821794
G1	Y1	0.58743	0.58743
G1	H1	0.187041	0.187041
G1	R1	0.490622	0.490622
G1	N1	-0.461877	0.461877
G1	D1	-0.40369	0.40369
G1	T1	-0.645225	0.645225
G1	scont1	0.252161	0.252161
G1	Number.of.introns1	-0.0934766	0.0934766
G1	First.intron.length1	-0.0935445	0.0935445
G1	First.intron.GC1	-0.0922154	0.0922154
G1	mRNA.half.life.short1	0.455807	0.455807
G1	Ribosome.occupancy1	-0.13925	0.13925
G1	Ribosome.density..rb.kb.1	0.695826	0.695826
G1	ORF.length..nt.1	-0.501578	0.501578
G1	GO.0006350_TRANSCRIPTION1	-0.417334	0.417334
G1	GO.0006412_PROTEIN_BIOSYNTHESIS1	0.361779	0.361779
G1	cyto1	0.186005	0.186005
G1	er1	-0.315476	0.315476
G1	MOLECULAR.WEIGHT..in.Daltons.	-0.500467	0.500467
G1	PI	-0.563445	0.563445
G1	CAI..Codon.Adaptation.Index.	0.273255	0.273255
G1	PROTEIN.LENGTH	-0.500415	0.500415
G1	CODON.BIAS	0.407465	0.407465
G1	ALA	-0.243038	0.243038
G1	ASN	-0.438839	0.438839
G1	ASP	-0.703917	0.703917
G1	CYS	-0.161765	0.161765
G1	GLN	-0.193563	0.193563
G1	GLU	-0.18376	0.18376
G1	GLY	0.385875	0.385875
G1	HIS	-0.156503	0.156503
G1	ILE	-0.768533	0.768533
G1	LEU	-0.825347	0.825347
G1	LYS	-0.660245	0.660245
G1	MET	0.111339	0.111339
G1	SER	-0.204449	0.204449
G1	THR	-0.532437	0.532437
G1	VAL	-0.509078	0.509078
G1	FOP.SCORE..Frequency.of.Optimal.Codons.	0.401007	0.401007
G1	GRAVY.SCORE..Hydropathicity.of.Protein.	-0.388816	0.388816
G1	AROMATICITY.SCORE..Frequency.of.aromatic.amino.acids..Phe..Tyr..Trp.	0.734134	0.734134
G1	econt	0.286071	0.286071
G1	hcont	-0.82546	0.82546
G1	econtrel	0.547327	0.547327
G1	ccontrel	0.554438	0.554438
G1	hcontrel	-0.804031	0.804031
G1	protlength2	-0.43122	0.43122
G1	pH2	0.127669	0.127669
G1	kDa2	-0.430173	0.430173
G1	K2	0.0866033	0.0866033
G1	S2	-0.0938817	0.0938817
G1	R2	0.141138	0.141138
G1	N2	-0.091595	0.091595
G1	D2	-0.0998148	0.0998148
G1	ncont2	0.12755	0.12755
G1	Number.of.introns2	0.158653	0.158653
G1	First.intron.length2	0.158949	0.158949
G1	First.intron.GC2	0.157059	0.157059
G1	Ribosome.occupancy2	0.193231	0.193231
G1	Ribosome.density..rb.kb.2	0.163744	0.163744
G1	ORF.length..nt.2	-0.430447	0.430447
G1	GO.0006412_PROTEIN_BIOSYNTHESIS2	0.10294	0.10294
G1	mito2	0.10216	0.10216
G1	relinstems	-0.1042	0.1042
G1	length	-0.427644	0.427644
G1	nstems	-0.421738	0.421738
G1	csorf	0.0949669	0.0949669
G1	lu5	-0.136868	0.136868
G1	u5A	0.0986015	0.0986015
G1	u5T	-0.143623	0.143623
G1	X5AUel	-0.136597	0.136597
G1	lcds	-0.43122	0.43122
G1	cdsT	-0.196059	0.196059
G1	cdsG	0.169431	0.169431
G1	cdsAT	-0.143201	0.143201
G1	cdsAG	0.189811	0.189811
G1	cdsCT	-0.0875895	0.0875895
G1	cdsCG	0.0972123	0.0972123
G1	cdsAUel	-0.430912	0.430912
G1	ene	0.418572	0.418572
G1	nostems	-0.425773	0.425773
G1	relstems	0.313066	0.313066
G1	length.1	-0.431855	0.431855
G1	lu5.1	-0.136868	0.136868
G1	lorf.1	-0.43122	0.43122
A1	L1	-0.0885156	0.0885156
A1	M1	0.423475	0.423475
A1	F1	0.345401	0.345401
A1	K1	0.129425	0.129425
A1	Q1	-0.137954	0.137954
A1	E1	-0.224725	0.224725
A1	P1	-0.0840485	0.0840485
A1	V1	0.279988	0.279988
A1	C1	0.221935	0.221935
A1	Y1	0.16266	0.16266
A1	R1	-0.453146	0.453146
A1	N1	-0.148249	0.148249
A1	D1	-0.384543	0.384543
A1	ncont1	-0.654116	0.654116
A1	scont1	0.330699	0.330699
A1	Number.of.introns1	-0.152378	0.152378
A1	First.intron.length1	-0.152666	0.152666
A1	First.intron.GC1	-0.153078	0.153078
A1	mRNA.half.life.short1	0.506953	0.506953
A1	Ribosome.occupancy1	-0.182516	0.182516
A1	Ribosome.density..rb.kb.1	0.226604	0.226604
A1	ORF.length..nt.1	0.411191	0.411191
A1	GO.0006350_TRANSCRIPTION1	0.126753	0.126753
A1	GO.0006412_PROTEIN_BIOSYNTHESIS1	0.628447	0.628447
A1	cyto1	0.466006	0.466006
A1	er1	0.370127	0.370127
A1	MOLECULAR.WEIGHT..in.Daltons.	0.40467	0.40467
A1	PI	-0.145986	0.145986
A1	CAI..Codon.Adaptation.Index.	0.255544	0.255544
A1	PROTEIN.LENGTH	0.408782	0.408782
A1	CODON.BIAS	0.259101	0.259101
A1	ALA	0.780924	0.780924
A1	ASN	0.295485	0.295485
A1	CYS	0.280563	0.280563
A1	GLN	0.106141	0.106141
A1	GLU	0.244083	0.244083
A1	GLY	0.242391	0.242391
A1	HIS	0.2486	0.2486
A1	ILE	0.236582	0.236582
A1	LEU	0.118933	0.118933
A1	LYS	0.243523	0.243523
A1	MET	0.446841	0.446841
A1	PHE	0.515327	0.515327
A1	PRO	0.179173	0.179173
A1	SER	0.409349	0.409349
A1	THR	0.325052	0.325052
A1	TRP	0.165022	0.165022
A1	TYR	0.415966	0.415966
A1	VAL	0.411839	0.411839
A1	FOP.SCORE..Frequency.of.Optimal.Codons.	0.262972	0.262972
A1	GRAVY.SCORE..Hydropathicity.of.Protein.	0.571478	0.571478
A1	AROMATICITY.SCORE..Frequency.of.aromatic.amino.acids..Phe..Tyr..Trp.	0.159295	0.159295
A1	econt	0.697763	0.697763
A1	ccont	0.371144	0.371144
A1	hcont	0.146395	0.146395
A1	econtrel	0.648586	0.648586
A1	ccontrel	-0.267264	0.267264
A1	cdsCT	0.0883189	0.0883189
L1	M1	-0.276756	0.276756
L1	F1	-0.530415	0.530415
L1	W1	-0.333294	0.333294
L1	K1	0.662844	0.662844
L1	P1	-0.433548	0.433548
L1	V1	0.351979	0.351979
L1	I1	0.627085	0.627085
L1	Y1	-0.263816	0.263816
L1	H1	-0.205433	0.205433
L1	R1	-0.310734	0.310734
L1	N1	0.13476	0.13476
L1	D1	0.275119	0.275119
L1	T1	0.680778	0.680778
L1	scont1	-0.217419	0.217419
L1	mRNA.half.life.short1	-0.375642	0.375642
L1	Ribosome.density..rb.kb.1	-0.508608	0.508608
L1	ORF.length..nt.1	0.529882	0.529882
L1	GO.0006350_TRANSCRIPTION1	0.32823	0.32823
L1	cyto1	-0.193101	0.193101
L1	er1	0.452514	0.452514
L1	MOLECULAR.WEIGHT..in.Daltons.	0.5363	0.5363
L1	PI	0.812379	0.812379
L1	CAI..Codon.Adaptation.Index.	-0.109102	0.109102
L1	PROTEIN.LENGTH	0.530251	0.530251
L1	CODON.BIAS	-0.230048	0.230048
L1	ALA	0.279488	0.279488
L1	ASN	0.221987	0.221987
L1	ASP	0.659911	0.659911
L1	CYS	0.259256	0.259256
L1	GLN	0.0897677	0.0897677
L1	GLU	0.164424	0.164424
L1	GLY	-0.351916	0.351916
L1	HIS	0.168804	0.168804
L1	ILE	0.669134	0.669134
L1	LEU	0.843724	0.843724
L1	LYS	0.700337	0.700337
L1	MET	-0.192674	0.192674
L1	SER	0.142336	0.142336
L1	THR	0.53695	0.53695
L1	TYR	0.176606	0.176606
L1	VAL	0.527903	0.527903
L1	FOP.SCORE..Frequency.of.Optimal.Codons.	-0.228722	0.228722
L1	GRAVY.SCORE..Hydropathicity.of.Protein.	0.452588	0.452588
L1	AROMATICITY.SCORE..Frequency.of.aromatic.amino.acids..Phe..Tyr..Trp.	-0.513785	0.513785
L1	econt	-0.261874	0.261874
L1	hcont	0.812058	0.812058
L1	econtrel	-0.453028	0.453028
L1	ccontrel	-0.590093	0.590093
L1	hcontrel	0.871908	0.871908
L1	protlength2	0.302486	0.302486
L1	pH2	-0.0949402	0.0949402
L1	kDa2	0.30232	0.30232
L1	R2	-0.0922886	0.0922886
L1	D2	0.0987609	0.0987609
L1	Ribosome.occupancy2	-0.144153	0.144153
L1	Ribosome.density..rb.kb.2	-0.117574	0.117574
L1	ORF.length..nt.2	0.304162	0.304162
L1	length	0.299856	0.299856
L1	nstems	0.296143	0.296143
L1	u5T	0.0899111	0.0899111
L1	lcds	0.302486	0.302486
L1	cdsT	0.116683	0.116683
L1	cdsG	-0.120336	0.120336
L1	cdsAT	0.104408	0.104408
L1	cdsAG	-0.105888	0.105888
L1	cdsAUel	0.302252	0.302252
L1	ene	-0.287234	0.287234
L1	nostems	0.293531	0.293531
L1	relstems	-0.209431	0.209431
L1	length.1	0.297528	0.297528
L1	lorf.1	0.302486	0.302486
M1	F1	0.482974	0.482974
M1	W1	0.453926	0.453926
M1	K1	-0.500116	0.500116
M1	Q1	0.473772	0.473772
M1	E1	-0.726946	0.726946
M1	S1	-0.0914646	0.0914646
M1	P1	0.487876	0.487876
M1	V1	-0.145491	0.145491
M1	I1	-0.247321	0.247321
M1	C1	0.628327	0.628327
M1	Y1	0.4161	0.4161
M1	H1	0.356806	0.356806
M1	R1	-0.438885	0.438885
M1	N1	0.373189	0.373189
M1	D1	-0.138491	0.138491
M1	T1	-0.301319	0.301319
M1	ncont1	-0.0915133	0.0915133
M1	scont1	0.963137	0.963137
M1	mRNA.half.life.short1	0.489862	0.489862
M1	Ribosome.density..rb.kb.1	0.190295	0.190295
M1	ORF.length..nt.1	0.168284	0.168284
M1	GO.0006412_PROTEIN_BIOSYNTHESIS1	0.340409	0.340409
M1	cyto1	0.673254	0.673254
M1	er1	-0.224854	0.224854
M1	MOLECULAR.WEIGHT..in.Daltons.	0.164038	0.164038
M1	PI	-0.378792	0.378792
M1	CAI..Codon.Adaptation.Index.	-0.269995	0.269995
M1	PROTEIN.LENGTH	0.164871	0.164871
M1	CODON.BIAS	-0.262866	0.262866
M1	ALA	0.304852	0.304852
M1	ARG	-0.336993	0.336993
M1	ASN	0.453257	0.453257
M1	ASP	-0.18904	0.18904
M1	CYS	0.423328	0.423328
M1	GLN	0.681448	0.681448
M1	GLU	-0.398662	0.398662
M1	HIS	0.143969	0.143969
M1	ILE	-0.15798	0.15798
M1	LEU	-0.190339	0.190339
M1	LYS	-0.330128	0.330128
M1	MET	0.906568	0.906568
M1	PHE	0.393084	0.393084
M1	PRO	0.17288	0.17288
M1	SER	0.096193	0.096193
M1	TRP	0.418122	0.418122
M1	TYR	0.252393	0.252393
M1	VAL	0.109779	0.109779
M1	FOP.SCORE..Frequency.of.Optimal.Codons.	-0.262592	0.262592
M1	GRAVY.SCORE..Hydropathicity.of.Protein.	0.153844	0.153844
M1	AROMATICITY.SCORE..Frequency.of.aromatic.amino.acids..Phe..Tyr..Trp.	0.499251	0.499251
M1	econt	0.345882	0.345882
M1	ccont	0.270707	0.270707
M1	hcont	-0.276598	0.276598
M1	econtrel	0.611601	0.611601
M1	ccontrel	0.244668	0.244668
M1	hcontrel	-0.373351	0.373351
M1	protlength2	-0.180242	0.180242
M1	pH2	0.0863313	0.0863313
M1	kDa2	-0.180262	0.180262
M1	ORF.length..nt.2	-0.178082	0.178082
M1	length	-0.169408	0.169408
M1	nstems	-0.168112	0.168112
M1	lcds	-0.180242	0.180242
M1	cdsAUel	-0.180149	0.180149
M1	ene	0.170311	0.170311
M1	nostems	-0.175242	0.175242
M1	relstems	0.114153	0.114153
M1	length.1	-0.175279	0.175279
M1	lorf.1	-0.180242	0.180242
F1	K1	-0.541091	0.541091
F1	E1	-0.314081	0.314081
F1	S1	-0.159176	0.159176
F1	P1	0.335213	0.335213
F1	V1	-0.319145	0.319145
F1	I1	-0.541047	0.541047
F1	C1	0.381174	0.381174
F1	Y1	0.650435	0.650435
F1	H1	0.188411	0.188411
F1	R1	0.139922	0.139922
F1	N1	-0.168561	0.168561
F1	D1	-0.53033	0.53033
F1	T1	-0.451175	0.451175
F1	scont1	0.515549	0.515549
F1	Number.of.introns1	0.103169	0.103169
F1	First.intron.length1	0.102598	0.102598
F1	First.intron.GC1	0.101848	0.101848
F1	mRNA.half.life.short1	0.445812	0.445812
F1	Ribosome.density..rb.kb.1	0.597614	0.597614
F1	ORF.length..nt.1	-0.164499	0.164499
F1	GO.0006350_TRANSCRIPTION1	-0.423747	0.423747
F1	GO.0006412_PROTEIN_BIOSYNTHESIS1	0.51456	0.51456
F1	GO.0008150_BIOLOGICAL_PROCESS1	0.29894	0.29894
F1	cyto1	0.557156	0.557156
F1	er1	-0.181376	0.181376
F1	MOLECULAR.WEIGHT..in.Daltons.	-0.160637	0.160637
F1	PI	-0.365313	0.365313
F1	CAI..Codon.Adaptation.Index.	0.110359	0.110359
F1	PROTEIN.LENGTH	-0.16537	0.16537
F1	CODON.BIAS	0.159627	0.159627
F1	ASN	-0.105261	0.105261
F1	ASP	-0.486341	0.486341
F1	CYS	0.166223	0.166223
F1	GLU	-0.231476	0.231476
F1	GLY	0.268854	0.268854
F1	ILE	-0.475809	0.475809
F1	LEU	-0.531554	0.531554
F1	LYS	-0.494893	0.494893
F1	MET	0.363262	0.363262
F1	PHE	0.425633	0.425633
F1	SER	-0.145224	0.145224
F1	THR	-0.310485	0.310485
F1	TRP	-0.126455	0.126455
F1	TYR	0.171576	0.171576
F1	VAL	-0.154001	0.154001
F1	FOP.SCORE..Frequency.of.Optimal.Codons.	0.160432	0.160432
F1	AROMATICITY.SCORE..Frequency.of.aromatic.amino.acids..Phe..Tyr..Trp.	0.894164	0.894164
F1	econt	0.351415	0.351415
F1	hcont	-0.592928	0.592928
F1	econtrel	0.622697	0.622697
F1	ccontrel	0.352712	0.352712
F1	hcontrel	-0.62521	0.62521
F1	protlength2	-0.297782	0.297782
F1	pH2	0.0928778	0.0928778
F1	kDa2	-0.299363	0.299363
F1	N2	-0.0910322	0.0910322
F1	D2	-0.0999378	0.0999378
F1	Number.of.introns2	0.144431	0.144431
F1	First.intron.length2	0.143805	0.143805
F1	First.intron.GC2	0.144492	0.144492
F1	Ribosome.occupancy2	0.114653	0.114653
F1	Ribosome.density..rb.kb.2	0.114592	0.114592
F1	ORF.length..nt.2	-0.294707	0.294707
F1	length	-0.280906	0.280906
F1	nstems	-0.27692	0.27692
F1	csorf	0.0825566	0.0825566
F1	lcds	-0.297782	0.297782
F1	cdsG	0.0980313	0.0980313
F1	cdsAT	-0.124118	0.124118
F1	cdsAG	0.0926647	0.0926647
F1	cdsAUel	-0.297386	0.297386
F1	ene	0.282876	0.282876
F1	nostems	-0.289466	0.289466
F1	relstems	0.21138	0.21138
F1	length.1	-0.291155	0.291155
F1	lorf.1	-0.297782	0.297782
W1	K1	-0.416683	0.416683
W1	Q1	0.1177	0.1177
W1	E1	-0.467745	0.467745
W1	S1	0.413085	0.413085
W1	P1	0.331993	0.331993
W1	I1	-0.112644	0.112644
W1	C1	0.439807	0.439807
W1	H1	0.234945	0.234945
W1	R1	-0.16593	0.16593
W1	N1	0.232687	0.232687
W1	D1	0.100011	0.100011
W1	T1	-0.195865	0.195865
W1	scont1	0.483193	0.483193
W1	Number.of.introns1	-0.12727	0.12727
W1	First.intron.length1	-0.127092	0.127092
W1	First.intron.GC1	-0.126794	0.126794
W1	mRNA.half.life.short1	0.215105	0.215105
W1	Ribosome.occupancy1	-0.207575	0.207575
W1	Ribosome.density..rb.kb.1	-0.219757	0.219757
W1	GO.0006350_TRANSCRIPTION1	0.135077	0.135077
W1	GO.0006412_PROTEIN_BIOSYNTHESIS1	-0.338042	0.338042
W1	cyto1	0.0939873	0.0939873
W1	er1	-0.513223	0.513223
W1	MOLECULAR.WEIGHT..in.Daltons.	-0.0913802	0.0913802
W1	PI	-0.4877	0.4877
W1	CAI..Codon.Adaptation.Index.	-0.362456	0.362456
W1	CODON.BIAS	-0.30377	0.30377
W1	ASN	0.31843	0.31843
W1	ASP	-0.160519	0.160519
W1	CYS	0.408707	0.408707
W1	GLN	0.25994	0.25994
W1	GLU	-0.374441	0.374441
W1	GLY	0.135618	0.135618
W1	ILE	-0.198046	0.198046
W1	LEU	-0.207295	0.207295
W1	LYS	-0.33233	0.33233
W1	MET	0.383403	0.383403
W1	PHE	0.102218	0.102218
W1	PRO	0.113997	0.113997
W1	SER	0.264946	0.264946
W1	THR	-0.108105	0.108105
W1	TRP	0.899065	0.899065
W1	VAL	-0.172717	0.172717
W1	FOP.SCORE..Frequency.of.Optimal.Codons.	-0.302602	0.302602
W1	AROMATICITY.SCORE..Frequency.of.aromatic.amino.acids..Phe..Tyr..Trp.	0.139132	0.139132
W1	econt	0.242336	0.242336
W1	ccont	0.171361	0.171361
W1	hcont	-0.23807	0.23807
W1	econtrel	0.254998	0.254998
W1	ccontrel	0.312189	0.312189
W1	hcontrel	-0.311452	0.311452
W1	u3A	-0.082128	0.082128
K1	Q1	-0.278985	0.278985
K1	E1	0.51162	0.51162
K1	S1	-0.131877	0.131877
K1	P1	-0.851827	0.851827
K1	V1	0.435905	0.435905
K1	I1	0.490881	0.490881
K1	C1	-0.410396	0.410396
K1	Y1	-0.60493	0.60493
K1	H1	-0.738281	0.738281
K1	R1	-0.239409	0.239409
K1	N1	-0.206591	0.206591
K1	D1	0.373862	0.373862
K1	T1	0.556633	0.556633
K1	ncont1	-0.314056	0.314056
K1	scont1	-0.521828	0.521828
K1	mRNA.half.life.short1	-0.133948	0.133948
K1	Ribosome.density..rb.kb.1	-0.183354	0.183354
K1	ORF.length..nt.1	0.419489	0.419489
K1	GO.0006350_TRANSCRIPTION1	0.203082	0.203082
K1	GO.0006412_PROTEIN_BIOSYNTHESIS1	0.11917	0.11917
K1	GO.0008150_BIOLOGICAL_PROCESS1	-0.126225	0.126225
K1	cyto1	-0.372353	0.372353
K1	er1	0.724241	0.724241
K1	MOLECULAR.WEIGHT..in.Daltons.	0.403886	0.403886
K1	PI	0.507539	0.507539
K1	CAI..Codon.Adaptation.Index.	0.467481	0.467481
K1	PROTEIN.LENGTH	0.420001	0.420001
K1	CODON.BIAS	0.326577	0.326577
K1	ALA	0.323614	0.323614
K1	ARG	0.0865216	0.0865216
K1	ASP	0.652736	0.652736
K1	CYS	-0.113897	0.113897
K1	GLN	-0.297833	0.297833
K1	GLU	0.679965	0.679965
K1	GLY	-0.202573	0.202573
K1	HIS	-0.140885	0.140885
K1	ILE	0.523611	0.523611
K1	LEU	0.629302	0.629302
K1	LYS	0.908949	0.908949
K1	MET	-0.379444	0.379444
K1	PHE	-0.107458	0.107458
K1	PRO	-0.241061	0.241061
K1	SER	0.214834	0.214834
K1	THR	0.416955	0.416955
K1	TRP	-0.239147	0.239147
K1	VAL	0.454712	0.454712
K1	FOP.SCORE..Frequency.of.Optimal.Codons.	0.326911	0.326911
K1	GRAVY.SCORE..Hydropathicity.of.Protein.	0.217243	0.217243
K1	AROMATICITY.SCORE..Frequency.of.aromatic.amino.acids..Phe..Tyr..Trp.	-0.719435	0.719435
K1	ccont	-0.103057	0.103057
K1	hcont	0.748473	0.748473
K1	econtrel	-0.203436	0.203436
K1	ccontrel	-0.82547	0.82547
K1	hcontrel	0.842534	0.842534
K1	protlength2	0.287465	0.287465
K1	pH2	-0.115294	0.115294
K1	kDa2	0.288487	0.288487
K1	E2	0.0944709	0.0944709
K1	D2	0.131992	0.131992
K1	Ribosome.density..rb.kb.2	-0.103906	0.103906
K1	ORF.length..nt.2	0.287506	0.287506
K1	relinstems	0.0973677	0.0973677
K1	length	0.268797	0.268797
K1	nstems	0.270001	0.270001
K1	u3A	0.0881205	0.0881205
K1	lcds	0.287465	0.287465
K1	cdsC	-0.108162	0.108162
K1	cdsAT	0.0893582	0.0893582
K1	cdsAUel	0.287233	0.287233
K1	ene	-0.270059	0.270059
K1	nostems	0.273609	0.273609
K1	relstems	-0.19629	0.19629
K1	length.1	0.270265	0.270265
K1	lorf.1	0.287465	0.287465
Q1	E1	-0.373895	0.373895
Q1	S1	-0.576965	0.576965
Q1	P1	0.301149	0.301149
Q1	I1	-0.133978	0.133978
Q1	Y1	0.121914	0.121914
Q1	H1	0.223201	0.223201
Q1	R1	-0.121324	0.121324
Q1	N1	0.546847	0.546847
Q1	D1	0.224782	0.224782
Q1	T1	-0.379051	0.379051
Q1	ncont1	0.628554	0.628554
Q1	scont1	0.416435	0.416435
Q1	mRNA.half.life.short1	0.156699	0.156699
Q1	Ribosome.occupancy1	0.58622	0.58622
Q1	Ribosome.density..rb.kb.1	0.192643	0.192643
Q1	ORF.length..nt.1	-0.123661	0.123661
Q1	GO.0006350_TRANSCRIPTION1	-0.269499	0.269499
Q1	GO.0006412_PROTEIN_BIOSYNTHESIS1	0.0942813	0.0942813
Q1	cyto1	0.373585	0.373585
Q1	MOLECULAR.WEIGHT..in.Daltons.	-0.113658	0.113658
Q1	CAI..Codon.Adaptation.Index.	-0.11107	0.11107
Q1	PROTEIN.LENGTH	-0.128035	0.128035
Q1	CODON.BIAS	-0.143336	0.143336
Q1	ALA	-0.240261	0.240261
Q1	ARG	-0.610555	0.610555
Q1	ASN	0.104718	0.104718
Q1	ASP	-0.201026	0.201026
Q1	CYS	-0.233731	0.233731
Q1	GLN	0.820844	0.820844
Q1	GLU	-0.507696	0.507696
Q1	GLY	-0.514504	0.514504
Q1	HIS	-0.254639	0.254639
Q1	ILE	-0.22025	0.22025
Q1	LEU	-0.131048	0.131048
Q1	LYS	-0.302241	0.302241
Q1	MET	0.354749	0.354749
Q1	PHE	-0.283654	0.283654
Q1	PRO	-0.241138	0.241138
Q1	SER	-0.498452	0.498452
Q1	THR	-0.263057	0.263057
Q1	TYR	-0.259956	0.259956
Q1	VAL	-0.107847	0.107847
Q1	FOP.SCORE..Frequency.of.Optimal.Codons.	-0.14053	0.14053
Q1	GRAVY.SCORE..Hydropathicity.of.Protein.	-0.327352	0.327352
Q1	AROMATICITY.SCORE..Frequency.of.aromatic.amino.acids..Phe..Tyr..Trp.	0.100072	0.100072
Q1	econt	-0.277792	0.277792
Q1	ccont	-0.270835	0.270835
Q1	hcont	-0.143267	0.143267
Q1	cdsT	0.0880364	0.0880364
E1	S1	-0.173921	0.173921
E1	P1	-0.541861	0.541861
E1	C1	-0.849519	0.849519
E1	Y1	-0.373492	0.373492
E1	H1	-0.524713	0.524713
E1	R1	0.269984	0.269984
E1	N1	-0.549245	0.549245
E1	D1	0.196312	0.196312
E1	scont1	-0.807562	0.807562
E1	Number.of.introns1	-0.209241	0.209241
E1	First.intron.length1	-0.209356	0.209356
E1	First.intron.GC1	-0.208753	0.208753
E1	mRNA.half.life.short1	-0.213587	0.213587
E1	Ribosome.occupancy1	0.1939	0.1939
E1	Ribosome.density..rb.kb.1	0.229221	0.229221
E1	ORF.length..nt.1	-0.173284	0.173284
E1	GO.0006350_TRANSCRIPTION1	-0.123596	0.123596
E1	GO.0006412_PROTEIN_BIOSYNTHESIS1	-0.103204	0.103204
E1	GO.0008150_BIOLOGICAL_PROCESS1	-0.138114	0.138114
E1	cyto1	-0.621699	0.621699
E1	er1	0.374822	0.374822
E1	MOLECULAR.WEIGHT..in.Daltons.	-0.172778	0.172778
E1	CAI..Codon.Adaptation.Index.	0.657785	0.657785
E1	PROTEIN.LENGTH	-0.172711	0.172711
E1	CODON.BIAS	0.632075	0.632075
E1	ALA	-0.245988	0.245988
E1	ARG	0.233807	0.233807
E1	ASN	-0.510022	0.510022
E1	ASP	0.137467	0.137467
E1	CYS	-0.672946	0.672946
E1	GLN	-0.628033	0.628033
E1	GLU	0.698471	0.698471
E1	GLY	0.127287	0.127287
E1	HIS	-0.275129	0.275129
E1	ILE	-0.0933121	0.0933121
E1	LYS	0.337786	0.337786
E1	MET	-0.622112	0.622112
E1	PHE	-0.270217	0.270217
E1	PRO	-0.224209	0.224209
E1	SER	-0.178419	0.178419
E1	THR	-0.196166	0.196166
E1	TRP	-0.53418	0.53418
E1	TYR	-0.222607	0.222607
E1	VAL	-0.10726	0.10726
E1	FOP.SCORE..Frequency.of.Optimal.Codons.	0.632053	0.632053
E1	GRAVY.SCORE..Hydropathicity.of.Protein.	-0.443312	0.443312
E1	AROMATICITY.SCORE..Frequency.of.aromatic.amino.acids..Phe..Tyr..Trp.	-0.392844	0.392844
E1	ccont	-0.341918	0.341918
E1	hcont	0.126922	0.126922
E1	econtrel	-0.254412	0.254412
E1	ccontrel	-0.352681	0.352681
E1	hcontrel	0.199605	0.199605
E1	protlength2	0.0942117	0.0942117
E1	kDa2	0.0965924	0.0965924
E1	E2	0.104641	0.104641
E1	ORF.length..nt.2	0.091774	0.091774
E1	lcds	0.0942117	0.0942117
E1	cdsA	0.0843609	0.0843609
E1	cdsCT	-0.0906978	0.0906978
E1	cdsAUel	0.0940193	0.0940193
E1	ene	-0.0823961	0.0823961
E1	nostems	0.0841304	0.0841304
E1	lorf.1	0.0942117	0.0942117
S1	P1	0.219925	0.219925
S1	V1	-0.221529	0.221529
S1	I1	0.189877	0.189877
S1	C1	0.282358	0.282358
S1	Y1	-0.115293	0.115293
S1	H1	0.225464	0.225464
S1	T1	0.353099	0.353099
S1	ncont1	-0.52647	0.52647
S1	Number.of.introns1	0.180529	0.180529
S1	First.intron.length1	0.180623	0.180623
S1	First.intron.GC1	0.180028	0.180028
S1	mRNA.half.life.short1	-0.206504	0.206504
S1	Ribosome.occupancy1	-0.756687	0.756687
S1	Ribosome.density..rb.kb.1	-0.529606	0.529606
S1	ORF.length..nt.1	0.137856	0.137856
S1	GO.0006350_TRANSCRIPTION1	0.560741	0.560741
S1	GO.0006412_PROTEIN_BIOSYNTHESIS1	-0.460507	0.460507
S1	cyto1	-0.249177	0.249177
S1	er1	-0.469	0.469
S1	MOLECULAR.WEIGHT..in.Daltons.	0.118101	0.118101
S1	PI	-0.239837	0.239837
S1	CAI..Codon.Adaptation.Index.	-0.46475	0.46475
S1	PROTEIN.LENGTH	0.139103	0.139103
S1	CODON.BIAS	-0.396442	0.396442
S1	ALA	0.205653	0.205653
S1	ARG	0.429486	0.429486
S1	ASN	0.274947	0.274947
S1	ASP	0.117549	0.117549
S1	CYS	0.506273	0.506273
S1	GLN	-0.240146	0.240146
S1	GLY	0.354402	0.354402
S1	HIS	0.448985	0.448985
S1	ILE	0.264741	0.264741
S1	LEU	0.095381	0.095381
S1	PHE	0.211586	0.211586
S1	PRO	0.432634	0.432634
S1	SER	0.718473	0.718473
S1	THR	0.336502	0.336502
S1	TRP	0.548016	0.548016
S1	TYR	0.230965	0.230965
S1	FOP.SCORE..Frequency.of.Optimal.Codons.	-0.396126	0.396126
S1	GRAVY.SCORE..Hydropathicity.of.Protein.	0.319359	0.319359
S1	AROMATICITY.SCORE..Frequency.of.aromatic.amino.acids..Phe..Tyr..Trp.	-0.087361	0.087361
S1	ccont	0.492943	0.492943
S1	econtrel	-0.280787	0.280787
S1	ccontrel	0.47016	0.47016
S1	hcontrel	-0.0951613	0.0951613
S1	cdsC	0.0828298	0.0828298
S1	cdsCG	0.0826189	0.0826189
P1	V1	-0.457728	0.457728
P1	I1	-0.396765	0.396765
P1	C1	0.336285	0.336285
P1	Y1	0.654362	0.654362
P1	H1	0.790185	0.790185
P1	R1	0.128035	0.128035
P1	N1	0.0982242	0.0982242
P1	D1	-0.456247	0.456247
P1	T1	-0.360984	0.360984
P1	ncont1	0.193903	0.193903
P1	scont1	0.467177	0.467177
P1	mRNA.half.life.short1	-0.086322	0.086322
P1	Ribosome.occupancy1	-0.136002	0.136002
P1	ORF.length..nt.1	-0.105966	0.105966
P1	GO.0006350_TRANSCRIPTION1	0.111638	0.111638
P1	cyto1	0.249496	0.249496
P1	er1	-0.519484	0.519484
P1	MOLECULAR.WEIGHT..in.Daltons.	-0.0919962	0.0919962
P1	PI	-0.336378	0.336378
P1	CAI..Codon.Adaptation.Index.	-0.461412	0.461412
P1	PROTEIN.LENGTH	-0.108619	0.108619
P1	CODON.BIAS	-0.302209	0.302209
P1	ALA	-0.108544	0.108544
P1	ASN	0.147523	0.147523
P1	ASP	-0.45625	0.45625
P1	CYS	0.216118	0.216118
P1	GLN	0.428961	0.428961
P1	GLU	-0.560029	0.560029
P1	GLY	0.31905	0.31905
P1	HIS	0.43872	0.43872
P1	ILE	-0.288629	0.288629
P1	LEU	-0.360499	0.360499
P1	LYS	-0.681766	0.681766
P1	MET	0.438504	0.438504
P1	PHE	0.19836	0.19836
P1	PRO	0.5514	0.5514
P1	THR	-0.142025	0.142025
P1	TRP	0.314701	0.314701
P1	TYR	0.249589	0.249589
P1	VAL	-0.196096	0.196096
P1	FOP.SCORE..Frequency.of.Optimal.Codons.	-0.302178	0.302178
P1	GRAVY.SCORE..Hydropathicity.of.Protein.	-0.0953338	0.0953338
P1	AROMATICITY.SCORE..Frequency.of.aromatic.amino.acids..Phe..Tyr..Trp.	0.6103	0.6103
P1	ccont	0.394783	0.394783
P1	hcont	-0.486814	0.486814
P1	ccontrel	0.815042	0.815042
P1	hcontrel	-0.625307	0.625307
P1	protlength2	-0.292034	0.292034
P1	pH2	0.118922	0.118922
P1	kDa2	-0.291275	0.291275
P1	D2	-0.112666	0.112666
P1	Number.of.introns2	0.0819945	0.0819945
P1	First.intron.length2	0.0818884	0.0818884
P1	Ribosome.density..rb.kb.2	0.104675	0.104675
P1	ORF.length..nt.2	-0.290403	0.290403
P1	length	-0.274404	0.274404
P1	nstems	-0.276816	0.276816
P1	lcds	-0.292034	0.292034
P1	cdsAUel	-0.29215	0.29215
P1	ene	0.281706	0.281706
P1	nostems	-0.282616	0.282616
P1	relstems	0.196598	0.196598
P1	length.1	-0.279192	0.279192
P1	lorf.1	-0.292034	0.292034
V1	I1	0.733327	0.733327
V1	Y1	-0.439109	0.439109
V1	H1	-0.348099	0.348099
V1	R1	-0.410641	0.410641
V1	N1	0.33534	0.33534
V1	T1	0.50431	0.50431
V1	ncont1	-0.16968	0.16968
V1	scont1	-0.106246	0.106246
V1	mRNA.half.life.short1	-0.15359	0.15359
V1	Ribosome.occupancy1	0.243671	0.243671
V1	Ribosome.density..rb.kb.1	-0.352995	0.352995
V1	ORF.length..nt.1	0.41562	0.41562
V1	GO.0006350_TRANSCRIPTION1	0.192473	0.192473
V1	GO.0006412_PROTEIN_BIOSYNTHESIS1	-0.114051	0.114051
V1	GO.0008150_BIOLOGICAL_PROCESS1	0.183661	0.183661
V1	er1	0.517377	0.517377
V1	MOLECULAR.WEIGHT..in.Daltons.	0.423323	0.423323
V1	PI	0.175446	0.175446
V1	PROTEIN.LENGTH	0.416921	0.416921
V1	CODON.BIAS	-0.156863	0.156863
V1	ALA	0.399996	0.399996
V1	ASN	0.444894	0.444894
V1	ASP	0.47198	0.47198
V1	CYS	0.144823	0.144823
V1	GLU	0.305738	0.305738
V1	HIS	0.105633	0.105633
V1	ILE	0.588605	0.588605
V1	LEU	0.537775	0.537775
V1	LYS	0.525372	0.525372
V1	PHE	0.228129	0.228129
V1	SER	0.108434	0.108434
V1	THR	0.444972	0.444972
V1	TRP	0.131381	0.131381
V1	TYR	0.209358	0.209358
V1	VAL	0.602329	0.602329
V1	FOP.SCORE..Frequency.of.Optimal.Codons.	-0.152391	0.152391
V1	GRAVY.SCORE..Hydropathicity.of.Protein.	0.506658	0.506658
V1	AROMATICITY.SCORE..Frequency.of.aromatic.amino.acids..Phe..Tyr..Trp.	-0.476961	0.476961
V1	econt	0.395732	0.395732
V1	ccont	0.115958	0.115958
V1	hcont	0.563879	0.563879
V1	econtrel	0.147905	0.147905
V1	ccontrel	-0.650658	0.650658
V1	hcontrel	0.42898	0.42898
V1	protlength2	0.413307	0.413307
V1	pH2	-0.121209	0.121209
V1	kDa2	0.412303	0.412303
V1	F2	0.107884	0.107884
V1	K2	-0.117237	0.117237
V1	R2	-0.1415	0.1415
V1	ncont2	-0.13288	0.13288
V1	Number.of.introns2	-0.142226	0.142226
V1	First.intron.length2	-0.142912	0.142912
V1	First.intron.GC2	-0.140426	0.140426
V1	Ribosome.occupancy2	-0.138179	0.138179
V1	Ribosome.density..rb.kb.2	-0.140719	0.140719
V1	ORF.length..nt.2	0.411704	0.411704
V1	GO.0006412_PROTEIN_BIOSYNTHESIS2	-0.0957315	0.0957315
V1	relinstems	0.106312	0.106312
V1	length	0.40911	0.40911
V1	nstems	0.401835	0.401835
V1	cs5	-0.0817639	0.0817639
V1	csorf	-0.0819904	0.0819904
V1	u3G	-0.0904951	0.0904951
V1	lu5	0.144682	0.144682
V1	u5A	-0.102236	0.102236
V1	u5T	0.150583	0.150583
V1	X5AUel	0.144297	0.144297
V1	lcds	0.413307	0.413307
V1	cdsT	0.211124	0.211124
V1	cdsG	-0.186114	0.186114
V1	cdsAT	0.126351	0.126351
V1	cdsAG	-0.225687	0.225687
V1	cdsCT	0.136791	0.136791
V1	cdsCG	-0.104072	0.104072
V1	cdsAUel	0.413233	0.413233
V1	ene	-0.400153	0.400153
V1	nostems	0.407328	0.407328
V1	relstems	-0.296802	0.296802
V1	length.1	0.414769	0.414769
V1	lu5.1	0.144682	0.144682
V1	lorf.1	0.413307	0.413307
I1	C1	0.0938872	0.0938872
I1	Y1	-0.559928	0.559928
I1	H1	-0.189202	0.189202
I1	R1	-0.459975	0.459975
I1	N1	0.441908	0.441908
I1	D1	0.209264	0.209264
I1	T1	0.786162	0.786162
I1	ncont1	-0.27652	0.27652
I1	scont1	-0.19527	0.19527
I1	Number.of.introns1	0.0931255	0.0931255
I1	First.intron.length1	0.0935464	0.0935464
I1	First.intron.GC1	0.0921743	0.0921743
I1	mRNA.half.life.short1	-0.385441	0.385441
I1	Ribosome.density..rb.kb.1	-0.728222	0.728222
I1	ORF.length..nt.1	0.476207	0.476207
I1	GO.0006350_TRANSCRIPTION1	0.511169	0.511169
I1	GO.0006412_PROTEIN_BIOSYNTHESIS1	-0.377594	0.377594
I1	GO.0008150_BIOLOGICAL_PROCESS1	0.205917	0.205917
I1	cyto1	-0.106592	0.106592
I1	er1	0.283958	0.283958
I1	MOLECULAR.WEIGHT..in.Daltons.	0.472591	0.472591
I1	PI	0.392068	0.392068
I1	CAI..Codon.Adaptation.Index.	-0.412234	0.412234
I1	PROTEIN.LENGTH	0.474872	0.474872
I1	CODON.BIAS	-0.514045	0.514045
I1	ALA	0.400595	0.400595
I1	ASN	0.517845	0.517845
I1	ASP	0.592775	0.592775
I1	CYS	0.331202	0.331202
I1	GLU	0.166279	0.166279
I1	GLY	-0.239981	0.239981
I1	HIS	0.249802	0.249802
I1	ILE	0.861203	0.861203
I1	LEU	0.728443	0.728443
I1	LYS	0.574699	0.574699
I1	MET	-0.107417	0.107417
I1	PHE	0.118786	0.118786
I1	PRO	0.11582	0.11582
I1	SER	0.32095	0.32095
I1	THR	0.633803	0.633803
I1	TRP	0.155924	0.155924
I1	TYR	0.162506	0.162506
I1	VAL	0.535173	0.535173
I1	FOP.SCORE..Frequency.of.Optimal.Codons.	-0.508934	0.508934
I1	GRAVY.SCORE..Hydropathicity.of.Protein.	0.688838	0.688838
I1	AROMATICITY.SCORE..Frequency.of.aromatic.amino.acids..Phe..Tyr..Trp.	-0.634982	0.634982
I1	ccont	0.214631	0.214631
I1	hcont	0.71465	0.71465
I1	econtrel	-0.315724	0.315724
I1	ccontrel	-0.488245	0.488245
I1	hcontrel	0.590708	0.590708
I1	protlength2	0.427541	0.427541
I1	pH2	-0.131179	0.131179
I1	kDa2	0.425103	0.425103
I1	F2	0.0851981	0.0851981
I1	K2	-0.141855	0.141855
I1	S2	0.121977	0.121977
I1	Y2	0.0877605	0.0877605
I1	R2	-0.167391	0.167391
I1	N2	0.0910325	0.0910325
I1	T2	0.0834334	0.0834334
I1	ncont2	-0.147664	0.147664
I1	Number.of.introns2	-0.123458	0.123458
I1	First.intron.length2	-0.123189	0.123189
I1	First.intron.GC2	-0.121848	0.121848
I1	Ribosome.occupancy2	-0.198419	0.198419
I1	Ribosome.density..rb.kb.2	-0.163866	0.163866
I1	ORF.length..nt.2	0.427797	0.427797
I1	GO.0006412_PROTEIN_BIOSYNTHESIS2	-0.111481	0.111481
I1	mito2	-0.105153	0.105153
I1	length	0.430413	0.430413
I1	nstems	0.421903	0.421903
I1	cs5	-0.083909	0.083909
I1	csorf	-0.106474	0.106474
I1	lu5	0.155519	0.155519
I1	u5A	-0.113515	0.113515
I1	u5T	0.163103	0.163103
I1	u5CT	0.0897696	0.0897696
I1	X5AUel	0.155377	0.155377
I1	lcds	0.427541	0.427541
I1	cdsT	0.20432	0.20432
I1	cdsG	-0.215596	0.215596
I1	cdsAT	0.131912	0.131912
I1	cdsAG	-0.24595	0.24595
I1	cdsCT	0.146237	0.146237
I1	cdsAUel	0.427375	0.427375
I1	ene	-0.416856	0.416856
I1	nostems	0.422512	0.422512
I1	relstems	-0.313742	0.313742
I1	length.1	0.433083	0.433083
I1	lu5.1	0.155519	0.155519
I1	lorf.1	0.427541	0.427541
C1	Y1	0.341161	0.341161
C1	H1	0.382822	0.382822
C1	R1	-0.14899	0.14899
C1	N1	0.407358	0.407358
C1	ncont1	-0.113052	0.113052
C1	scont1	0.760671	0.760671
C1	Number.of.introns1	0.207627	0.207627
C1	First.intron.length1	0.207838	0.207838
C1	First.intron.GC1	0.207703	0.207703
C1	mRNA.half.life.short1	0.270809	0.270809
C1	Ribosome.occupancy1	-0.211994	0.211994
C1	Ribosome.density..rb.kb.1	-0.253333	0.253333
C1	ORF.length..nt.1	0.116389	0.116389
C1	GO.0008150_BIOLOGICAL_PROCESS1	0.297068	0.297068
C1	cyto1	0.496999	0.496999
C1	er1	-0.485573	0.485573
C1	MOLECULAR.WEIGHT..in.Daltons.	0.109623	0.109623
C1	CAI..Codon.Adaptation.Index.	-0.639919	0.639919
C1	PROTEIN.LENGTH	0.117161	0.117161
C1	CODON.BIAS	-0.656577	0.656577
C1	ALA	0.216021	0.216021
C1	ARG	-0.141915	0.141915
C1	ASN	0.371914	0.371914
C1	CYS	0.803041	0.803041
C1	GLN	0.309179	0.309179
C1	GLU	-0.605639	0.605639
C1	GLY	-0.121714	0.121714
C1	HIS	0.148348	0.148348
C1	ILE	0.0852645	0.0852645
C1	LYS	-0.298555	0.298555
C1	MET	0.480031	0.480031
C1	PHE	0.253881	0.253881
C1	PRO	0.104068	0.104068
C1	SER	0.210742	0.210742
C1	THR	0.15724	0.15724
C1	TRP	0.477872	0.477872
C1	TYR	0.187659	0.187659
C1	FOP.SCORE..Frequency.of.Optimal.Codons.	-0.657306	0.657306
C1	GRAVY.SCORE..Hydropathicity.of.Protein.	0.486636	0.486636
C1	AROMATICITY.SCORE..Frequency.of.aromatic.amino.acids..Phe..Tyr..Trp.	0.401436	0.401436
C1	ccont	0.234905	0.234905
C1	hcont	-0.153758	0.153758
C1	econtrel	0.280901	0.280901
C1	ccontrel	0.31363	0.31363
C1	hcontrel	-0.211932	0.211932
C1	protlength2	-0.0965207	0.0965207
C1	kDa2	-0.0997885	0.0997885
C1	E2	-0.113871	0.113871
C1	D2	-0.0919013	0.0919013
C1	Number.of.introns2	0.0888619	0.0888619
C1	First.intron.length2	0.0878074	0.0878074
C1	First.intron.GC2	0.0889629	0.0889629
C1	ORF.length..nt.2	-0.0937321	0.0937321
C1	lcds	-0.0965207	0.0965207
C1	cdsA	-0.0856053	0.0856053
C1	cdsC	0.107702	0.107702
C1	cdsCT	0.0898633	0.0898633
C1	cdsAUel	-0.0961263	0.0961263
C1	ene	0.0819014	0.0819014
C1	nostems	-0.086963	0.086963
C1	lorf.1	-0.0965207	0.0965207
Y1	H1	0.552299	0.552299
Y1	R1	0.256867	0.256867
Y1	N1	-0.307412	0.307412
Y1	D1	-0.574838	0.574838
Y1	T1	-0.408769	0.408769
Y1	ncont1	0.15599	0.15599
Y1	scont1	0.416932	0.416932
Y1	mRNA.half.life.short1	0.0877961	0.0877961
Y1	Ribosome.density..rb.kb.1	0.367676	0.367676
Y1	GO.0006350_TRANSCRIPTION1	-0.194395	0.194395
Y1	GO.0006412_PROTEIN_BIOSYNTHESIS1	0.452917	0.452917
Y1	GO.0008150_BIOLOGICAL_PROCESS1	0.152686	0.152686
Y1	cyto1	0.263573	0.263573
Y1	er1	-0.204214	0.204214
Y1	CAI..Codon.Adaptation.Index.	-0.0831276	0.0831276
Y1	ARG	0.173284	0.173284
Y1	ASN	-0.154605	0.154605
Y1	ASP	-0.405129	0.405129
Y1	CYS	0.217074	0.217074
Y1	GLN	0.128518	0.128518
Y1	GLU	-0.340187	0.340187
Y1	GLY	0.325883	0.325883
Y1	HIS	0.308076	0.308076
Y1	ILE	-0.374752	0.374752
Y1	LEU	-0.30884	0.30884
Y1	LYS	-0.505384	0.505384
Y1	MET	0.284862	0.284862
Y1	PHE	0.276187	0.276187
Y1	PRO	0.343415	0.343415
Y1	SER	-0.138643	0.138643
Y1	THR	-0.190356	0.190356
Y1	TYR	0.401179	0.401179
Y1	VAL	-0.0969834	0.0969834
Y1	AROMATICITY.SCORE..Frequency.of.aromatic.amino.acids..Phe..Tyr..Trp.	0.875584	0.875584
Y1	econt	0.168745	0.168745
Y1	ccont	0.271813	0.271813
Y1	hcont	-0.450184	0.450184
Y1	econtrel	0.341945	0.341945
Y1	ccontrel	0.503766	0.503766
Y1	hcontrel	-0.53587	0.53587
Y1	protlength2	-0.323885	0.323885
Y1	pH2	0.119784	0.119784
Y1	kDa2	-0.323096	0.323096
Y1	D2	-0.104773	0.104773
Y1	Number.of.introns2	0.128811	0.128811
Y1	First.intron.length2	0.128919	0.128919
Y1	First.intron.GC2	0.127986	0.127986
Y1	Ribosome.occupancy2	0.090425	0.090425
Y1	Ribosome.density..rb.kb.2	0.113469	0.113469
Y1	ORF.length..nt.2	-0.321233	0.321233
Y1	relinstems	-0.0974953	0.0974953
Y1	length	-0.310059	0.310059
Y1	nstems	-0.30904	0.30904
Y1	lcds	-0.323885	0.323885
Y1	cdsC	0.0835735	0.0835735
Y1	cdsT	-0.107541	0.107541
Y1	cdsAT	-0.0916919	0.0916919
Y1	cdsAG	0.0821367	0.0821367
Y1	cdsAUel	-0.323666	0.323666
Y1	ene	0.314913	0.314913
Y1	nostems	-0.316909	0.316909
Y1	relstems	0.227623	0.227623
Y1	length.1	-0.315688	0.315688
Y1	lorf.1	-0.323885	0.323885
H1	N1	0.173289	0.173289
H1	D1	-0.45033	0.45033
H1	T1	-0.264588	0.264588
H1	ncont1	0.174747	0.174747
H1	scont1	0.351722	0.351722
H1	Number.of.introns1	0.114339	0.114339
H1	First.intron.length1	0.112966	0.112966
H1	First.intron.GC1	0.113144	0.113144
H1	Ribosome.density..rb.kb.1	-0.13634	0.13634
H1	ORF.length..nt.1	-0.117673	0.117673
H1	GO.0006350_TRANSCRIPTION1	0.0870766	0.0870766
H1	GO.0006412_PROTEIN_BIOSYNTHESIS1	-0.11534	0.11534
H1	cyto1	0.330411	0.330411
H1	er1	-0.601357	0.601357
H1	MOLECULAR.WEIGHT..in.Daltons.	-0.0903228	0.0903228
H1	PI	-0.0932362	0.0932362
H1	CAI..Codon.Adaptation.Index.	-0.551013	0.551013
H1	PROTEIN.LENGTH	-0.11692	0.11692
H1	CODON.BIAS	-0.413365	0.413365
H1	ASN	0.112638	0.112638
H1	ASP	-0.395586	0.395586
H1	CYS	0.218736	0.218736
H1	GLN	0.35608	0.35608
H1	GLU	-0.573557	0.573557
H1	GLY	0.134619	0.134619
H1	HIS	0.485625	0.485625
H1	ILE	-0.118568	0.118568
H1	LEU	-0.175533	0.175533
H1	LYS	-0.581958	0.581958
H1	MET	0.34996	0.34996
H1	PHE	0.0950475	0.0950475
H1	PRO	0.443258	0.443258
H1	THR	-0.0854447	0.0854447
H1	TRP	0.231364	0.231364
H1	TYR	0.17422	0.17422
H1	VAL	-0.173375	0.173375
H1	FOP.SCORE..Frequency.of.Optimal.Codons.	-0.40738	0.40738
H1	GRAVY.SCORE..Hydropathicity.of.Protein.	0.0971478	0.0971478
H1	AROMATICITY.SCORE..Frequency.of.aromatic.amino.acids..Phe..Tyr..Trp.	0.436375	0.436375
H1	econt	-0.218912	0.218912
H1	ccont	0.272706	0.272706
H1	hcont	-0.320109	0.320109
H1	econtrel	-0.132917	0.132917
H1	ccontrel	0.636808	0.636808
H1	hcontrel	-0.401787	0.401787
H1	protlength2	-0.167185	0.167185
H1	pH2	0.093553	0.093553
H1	kDa2	-0.169076	0.169076
H1	E2	-0.122573	0.122573
H1	D2	-0.12703	0.12703
H1	ORF.length..nt.2	-0.166214	0.166214
H1	relinstems	-0.119069	0.119069
H1	length	-0.146761	0.146761
H1	nstems	-0.152682	0.152682
H1	u3C	0.0826294	0.0826294
H1	lcds	-0.167185	0.167185
H1	cdsC	0.164668	0.164668
H1	cdsG	-0.0843954	0.0843954
H1	cdsAC	0.0846959	0.0846959
H1	cdsCT	0.0997396	0.0997396
H1	cdsTG	-0.0873808	0.0873808
H1	cdsAUel	-0.167006	0.167006
H1	ene	0.155148	0.155148
H1	nostems	-0.15531	0.15531
H1	relstems	0.109086	0.109086
H1	length.1	-0.146485	0.146485
H1	lorf.1	-0.167185	0.167185
R1	N1	-0.372373	0.372373
R1	T1	-0.295642	0.295642
R1	ncont1	0.480269	0.480269
R1	scont1	-0.378498	0.378498
R1	mRNA.half.life.short1	-0.08273	0.08273
R1	Ribosome.density..rb.kb.1	0.28137	0.28137
R1	ORF.length..nt.1	-0.613868	0.613868
R1	GO.0006350_TRANSCRIPTION1	-0.443944	0.443944
R1	GO.0008150_BIOLOGICAL_PROCESS1	0.103737	0.103737
R1	cyto1	-0.293488	0.293488
R1	er1	-0.30614	0.30614
R1	MOLECULAR.WEIGHT..in.Daltons.	-0.609111	0.609111
R1	PI	0.10746	0.10746
R1	CAI..Codon.Adaptation.Index.	0.131092	0.131092
R1	PROTEIN.LENGTH	-0.61058	0.61058
R1	CODON.BIAS	0.207324	0.207324
R1	ALA	-0.661143	0.661143
R1	ARG	0.190799	0.190799
R1	ASN	-0.716275	0.716275
R1	ASP	-0.44132	0.44132
R1	CYS	-0.340269	0.340269
R1	GLN	-0.412532	0.412532
R1	GLU	-0.244605	0.244605
R1	HIS	-0.375384	0.375384
R1	ILE	-0.522326	0.522326
R1	LEU	-0.547425	0.547425
R1	LYS	-0.463442	0.463442
R1	MET	-0.632613	0.632613
R1	PHE	-0.499797	0.499797
R1	PRO	-0.278786	0.278786
R1	SER	-0.450258	0.450258
R1	THR	-0.464777	0.464777
R1	TRP	-0.332008	0.332008
R1	TYR	-0.407811	0.407811
R1	VAL	-0.573099	0.573099
R1	FOP.SCORE..Frequency.of.Optimal.Codons.	0.199637	0.199637
R1	GRAVY.SCORE..Hydropathicity.of.Protein.	-0.535757	0.535757
R1	AROMATICITY.SCORE..Frequency.of.aromatic.amino.acids..Phe..Tyr..Trp.	0.267221	0.267221
R1	econt	-0.312984	0.312984
R1	ccont	-0.39403	0.39403
R1	hcont	-0.542609	0.542609
R1	econtrel	-0.129685	0.129685
R1	ccontrel	0.406353	0.406353
R1	hcontrel	-0.404281	0.404281
R1	protlength2	-0.269998	0.269998
R1	kDa2	-0.269513	0.269513
R1	Number.of.introns2	0.0988687	0.0988687
R1	First.intron.length2	0.100545	0.100545
R1	First.intron.GC2	0.0971228	0.0971228
R1	Ribosome.occupancy2	0.114514	0.114514
R1	Ribosome.density..rb.kb.2	0.103592	0.103592
R1	ORF.length..nt.2	-0.271961	0.271961
R1	relinstems	-0.105353	0.105353
R1	length	-0.270209	0.270209
R1	nstems	-0.267482	0.267482
R1	lu5	-0.0833415	0.0833415
R1	X5AUel	-0.0828181	0.0828181
R1	lcds	-0.269998	0.269998
R1	cdsT	-0.14908	0.14908
R1	cdsG	0.087966	0.087966
R1	cdsAG	0.11174	0.11174
R1	cdsAUel	-0.269842	0.269842
R1	ene	0.264068	0.264068
R1	nostems	-0.264118	0.264118
R1	relstems	0.197397	0.197397
R1	length.1	-0.266249	0.266249
R1	lu5.1	-0.0833415	0.0833415
R1	lorf.1	-0.269998	0.269998
N1	D1	0.265682	0.265682
N1	T1	0.169668	0.169668
N1	ncont1	0.254979	0.254979
N1	scont1	0.42581	0.42581
N1	Number.of.introns1	0.186679	0.186679
N1	First.intron.length1	0.186361	0.186361
N1	First.intron.GC1	0.186047	0.186047
N1	Ribosome.occupancy1	0.236019	0.236019
N1	Ribosome.density..rb.kb.1	-0.434295	0.434295
N1	ORF.length..nt.1	0.102618	0.102618
N1	GO.0006412_PROTEIN_BIOSYNTHESIS1	-0.340071	0.340071
N1	GO.0008150_BIOLOGICAL_PROCESS1	0.200482	0.200482
N1	cyto1	0.450114	0.450114
N1	er1	-0.236484	0.236484
N1	MOLECULAR.WEIGHT..in.Daltons.	0.0987977	0.0987977
N1	CAI..Codon.Adaptation.Index.	-0.642144	0.642144
N1	PROTEIN.LENGTH	0.101915	0.101915
N1	CODON.BIAS	-0.72288	0.72288
N1	ARG	-0.412457	0.412457
N1	ASN	0.600173	0.600173
N1	ASP	0.165169	0.165169
N1	CYS	0.237844	0.237844
N1	GLN	0.643523	0.643523
N1	GLU	-0.435011	0.435011
N1	GLY	-0.415699	0.415699
N1	ILE	0.304811	0.304811
N1	LEU	0.184833	0.184833
N1	LYS	-0.101656	0.101656
N1	MET	0.398778	0.398778
N1	THR	0.190198	0.190198
N1	TRP	0.265386	0.265386
N1	TYR	-0.11179	0.11179
N1	VAL	0.152278	0.152278
N1	FOP.SCORE..Frequency.of.Optimal.Codons.	-0.71939	0.71939
N1	GRAVY.SCORE..Hydropathicity.of.Protein.	0.181127	0.181127
N1	AROMATICITY.SCORE..Frequency.of.aromatic.amino.acids..Phe..Tyr..Trp.	-0.204205	0.204205
N1	econt	-0.180312	0.180312
N1	hcont	0.121683	0.121683
N1	protlength2	0.189037	0.189037
N1	kDa2	0.186148	0.186148
N1	K2	-0.0972683	0.0972683
N1	R2	-0.0984205	0.0984205
N1	ncont2	-0.101045	0.101045
N1	Number.of.introns2	-0.088734	0.088734
N1	First.intron.length2	-0.0893765	0.0893765
N1	First.intron.GC2	-0.0870555	0.0870555
N1	Ribosome.occupancy2	-0.107765	0.107765
N1	ORF.length..nt.2	0.187567	0.187567
N1	length	0.202562	0.202562
N1	nstems	0.196709	0.196709
N1	lu3	0.0867107	0.0867107
N1	u3T	0.0883628	0.0883628
N1	X3AUel	0.0829342	0.0829342
N1	lu5	0.121194	0.121194
N1	u5T	0.110109	0.110109
N1	X5AUel	0.120642	0.120642
N1	lcds	0.189037	0.189037
N1	cdsA	-0.0974677	0.0974677
N1	cdsT	0.160327	0.160327
N1	cdsG	-0.095566	0.095566
N1	cdsAG	-0.145737	0.145737
N1	cdsCT	0.119353	0.119353
N1	cdsAUel	0.189066	0.189066
N1	ene	-0.193697	0.193697
N1	nostems	0.198465	0.198465
N1	relstems	-0.159929	0.159929
N1	length.1	0.205735	0.205735
N1	lu3.1	0.0867107	0.0867107
N1	lu5.1	0.121194	0.121194
N1	lorf.1	0.189037	0.189037
D1	ncont1	0.269674	0.269674
D1	scont1	-0.147575	0.147575
D1	Number.of.introns1	-0.165461	0.165461
D1	First.intron.length1	-0.16629	0.16629
D1	First.intron.GC1	-0.164174	0.164174
D1	Ribosome.occupancy1	0.206536	0.206536
D1	Ribosome.density..rb.kb.1	-0.226951	0.226951
D1	ORF.length..nt.1	-0.1743	0.1743
D1	GO.0006412_PROTEIN_BIOSYNTHESIS1	-0.422203	0.422203
D1	GO.0008150_BIOLOGICAL_PROCESS1	-0.122818	0.122818
D1	cyto1	-0.395377	0.395377
D1	MOLECULAR.WEIGHT..in.Daltons.	-0.187788	0.187788
D1	PI	0.109577	0.109577
D1	PROTEIN.LENGTH	-0.172403	0.172403
D1	CODON.BIAS	-0.177702	0.177702
D1	ALA	-0.306175	0.306175
D1	ARG	-0.290201	0.290201
D1	ASN	-0.0918427	0.0918427
D1	ASP	0.305462	0.305462
D1	CYS	-0.144153	0.144153
D1	GLY	-0.525969	0.525969
D1	HIS	-0.534915	0.534915
D1	LYS	0.183927	0.183927
D1	MET	-0.259872	0.259872
D1	PHE	-0.54294	0.54294
D1	PRO	-0.55268	0.55268
D1	SER	-0.218173	0.218173
D1	THR	-0.125905	0.125905
D1	TYR	-0.510235	0.510235
D1	VAL	-0.185829	0.185829
D1	FOP.SCORE..Frequency.of.Optimal.Codons.	-0.185734	0.185734
D1	GRAVY.SCORE..Hydropathicity.of.Protein.	-0.308472	0.308472
D1	AROMATICITY.SCORE..Frequency.of.aromatic.amino.acids..Phe..Tyr..Trp.	-0.52636	0.52636
D1	econt	-0.37278	0.37278
D1	ccont	-0.507845	0.507845
D1	hcont	0.163118	0.163118
D1	econtrel	-0.273841	0.273841
D1	ccontrel	-0.311363	0.311363
D1	hcontrel	0.320152	0.320152
D1	protlength2	0.162564	0.162564
D1	pH2	-0.0826362	0.0826362
D1	kDa2	0.163662	0.163662
D1	E2	0.0989286	0.0989286
D1	D2	0.106638	0.106638
D1	ORF.length..nt.2	0.158708	0.158708
D1	length	0.143186	0.143186
D1	nstems	0.14678	0.14678
D1	lcds	0.162564	0.162564
D1	cdsC	-0.120217	0.120217
D1	cdsAUel	0.162351	0.162351
D1	ene	-0.154781	0.154781
D1	nostems	0.156805	0.156805
D1	relstems	-0.111482	0.111482
D1	length.1	0.151206	0.151206
D1	lorf.1	0.162564	0.162564
T1	ncont1	-0.478679	0.478679
T1	scont1	-0.221707	0.221707
T1	Number.of.introns1	0.101364	0.101364
T1	First.intron.length1	0.101602	0.101602
T1	First.intron.GC1	0.10069	0.10069
T1	mRNA.half.life.short1	-0.424318	0.424318
T1	Ribosome.occupancy1	-0.478834	0.478834
T1	Ribosome.density..rb.kb.1	-0.682258	0.682258
T1	ORF.length..nt.1	0.607816	0.607816
T1	GO.0006350_TRANSCRIPTION1	0.592784	0.592784
T1	GO.0006412_PROTEIN_BIOSYNTHESIS1	-0.109674	0.109674
T1	cyto1	-0.151502	0.151502
T1	er1	0.402592	0.402592
T1	MOLECULAR.WEIGHT..in.Daltons.	0.59909	0.59909
T1	PI	0.490494	0.490494
T1	CAI..Codon.Adaptation.Index.	-0.29793	0.29793
T1	PROTEIN.LENGTH	0.608544	0.608544
T1	CODON.BIAS	-0.368855	0.368855
T1	ALA	0.488861	0.488861
T1	ARG	0.336337	0.336337
T1	ASN	0.474342	0.474342
T1	ASP	0.679212	0.679212
T1	CYS	0.449002	0.449002
T1	GLN	-0.109573	0.109573
T1	GLU	0.321437	0.321437
T1	HIS	0.388585	0.388585
T1	ILE	0.842978	0.842978
T1	LEU	0.774023	0.774023
T1	LYS	0.684621	0.684621
T1	MET	-0.131595	0.131595
T1	PHE	0.240315	0.240315
T1	PRO	0.284414	0.284414
T1	SER	0.519358	0.519358
T1	THR	0.849011	0.849011
T1	TRP	0.165082	0.165082
T1	TYR	0.357251	0.357251
T1	VAL	0.637973	0.637973
T1	FOP.SCORE..Frequency.of.Optimal.Codons.	-0.367777	0.367777
T1	GRAVY.SCORE..Hydropathicity.of.Protein.	0.697267	0.697267
T1	AROMATICITY.SCORE..Frequency.of.aromatic.amino.acids..Phe..Tyr..Trp.	-0.541594	0.541594
T1	econt	0.114966	0.114966
T1	ccont	0.429376	0.429376
T1	hcont	0.759537	0.759537
T1	econtrel	-0.241993	0.241993
T1	ccontrel	-0.383545	0.383545
T1	hcontrel	0.644251	0.644251
T1	protlength2	0.255531	0.255531
T1	pH2	-0.088186	0.088186
T1	kDa2	0.253938	0.253938
T1	R2	-0.0842271	0.0842271
T1	Ribosome.occupancy2	-0.126376	0.126376
T1	Ribosome.density..rb.kb.2	-0.0995259	0.0995259
T1	ORF.length..nt.2	0.25727	0.25727
T1	mito2	-0.0864078	0.0864078
T1	length	0.260373	0.260373
T1	nstems	0.25595	0.25595
T1	u5T	0.0931721	0.0931721
T1	lcds	0.255531	0.255531
T1	cdsT	0.101808	0.101808
T1	cdsG	-0.100155	0.100155
T1	cdsAG	-0.118348	0.118348
T1	cdsAUel	0.255311	0.255311
T1	ene	-0.245613	0.245613
T1	nostems	0.249389	0.249389
T1	relstems	-0.179057	0.179057
T1	length.1	0.25471	0.25471
T1	lorf.1	0.255531	0.255531
ncont1	mRNA.half.life.short1	-0.174971	0.174971
ncont1	Ribosome.occupancy1	0.686796	0.686796
ncont1	Ribosome.density..rb.kb.1	0.148329	0.148329
ncont1	ORF.length..nt.1	-0.527835	0.527835
ncont1	GO.0006350_TRANSCRIPTION1	-0.498486	0.498486
ncont1	GO.0006412_PROTEIN_BIOSYNTHESIS1	-0.250871	0.250871
ncont1	cyto1	-0.100425	0.100425
ncont1	er1	-0.262304	0.262304
ncont1	MOLECULAR.WEIGHT..in.Daltons.	-0.505582	0.505582
ncont1	PI	0.228103	0.228103
ncont1	CAI..Codon.Adaptation.Index.	-0.095742	0.095742
ncont1	PROTEIN.LENGTH	-0.526373	0.526373
ncont1	CODON.BIAS	-0.0934719	0.0934719
ncont1	ALA	-0.782669	0.782669
ncont1	ARG	-0.30722	0.30722
ncont1	ASN	-0.401554	0.401554
ncont1	ASP	-0.318751	0.318751
ncont1	CYS	-0.420494	0.420494
ncont1	GLN	0.205909	0.205909
ncont1	GLU	-0.517211	0.517211
ncont1	GLY	-0.462325	0.462325
ncont1	HIS	-0.439847	0.439847
ncont1	ILE	-0.470853	0.470853
ncont1	LEU	-0.312212	0.312212
ncont1	LYS	-0.462741	0.462741
ncont1	MET	-0.262165	0.262165
ncont1	PHE	-0.576522	0.576522
ncont1	PRO	-0.383106	0.383106
ncont1	SER	-0.813081	0.813081
ncont1	THR	-0.603929	0.603929
ncont1	TRP	-0.289729	0.289729
ncont1	TYR	-0.498649	0.498649
ncont1	VAL	-0.469024	0.469024
ncont1	FOP.SCORE..Frequency.of.Optimal.Codons.	-0.0976115	0.0976115
ncont1	GRAVY.SCORE..Hydropathicity.of.Protein.	-0.637426	0.637426
ncont1	AROMATICITY.SCORE..Frequency.of.aromatic.amino.acids..Phe..Tyr..Trp.	0.128012	0.128012
ncont1	econt	-0.57072	0.57072
ncont1	ccont	-0.58578	0.58578
ncont1	hcont	-0.37637	0.37637
ncont1	econtrel	-0.257473	0.257473
ncont1	ccontrel	0.136857	0.136857
ncont1	hcontrel	-0.205403	0.205403
scont1	Number.of.introns1	0.121767	0.121767
scont1	First.intron.length1	0.122096	0.122096
scont1	First.intron.GC1	0.121323	0.121323
scont1	mRNA.half.life.short1	0.478097	0.478097
scont1	Ribosome.density..rb.kb.1	0.121863	0.121863
scont1	ORF.length..nt.1	0.122546	0.122546
scont1	GO.0006412_PROTEIN_BIOSYNTHESIS1	0.271667	0.271667
scont1	cyto1	0.689972	0.689972
scont1	er1	-0.295076	0.295076
scont1	MOLECULAR.WEIGHT..in.Daltons.	0.117735	0.117735
scont1	PI	-0.299533	0.299533
scont1	CAI..Codon.Adaptation.Index.	-0.371982	0.371982
scont1	PROTEIN.LENGTH	0.120254	0.120254
scont1	CODON.BIAS	-0.375192	0.375192
scont1	ALA	0.236541	0.236541
scont1	ARG	-0.334593	0.334593
scont1	ASN	0.44318	0.44318
scont1	ASP	-0.209205	0.209205
scont1	CYS	0.531097	0.531097
scont1	GLN	0.620093	0.620093
scont1	GLU	-0.495283	0.495283
scont1	HIS	0.103906	0.103906
scont1	ILE	-0.162343	0.162343
scont1	LEU	-0.181901	0.181901
scont1	LYS	-0.358823	0.358823
scont1	MET	0.851209	0.851209
scont1	PHE	0.369887	0.369887
scont1	PRO	0.12625	0.12625
scont1	TRP	0.442977	0.442977
scont1	TYR	0.216624	0.216624
scont1	VAL	0.0922707	0.0922707
scont1	FOP.SCORE..Frequency.of.Optimal.Codons.	-0.376068	0.376068
scont1	GRAVY.SCORE..Hydropathicity.of.Protein.	0.214597	0.214597
scont1	AROMATICITY.SCORE..Frequency.of.aromatic.amino.acids..Phe..Tyr..Trp.	0.516328	0.516328
scont1	econt	0.298597	0.298597
scont1	ccont	0.229941	0.229941
scont1	hcont	-0.292638	0.292638
scont1	econtrel	0.586043	0.586043
scont1	ccontrel	0.2574	0.2574
scont1	hcontrel	-0.363897	0.363897
scont1	protlength2	-0.164988	0.164988
scont1	pH2	0.085452	0.085452
scont1	kDa2	-0.165672	0.165672
scont1	Number.of.introns2	0.0949155	0.0949155
scont1	First.intron.length2	0.0932072	0.0932072
scont1	First.intron.GC2	0.0946321	0.0946321
scont1	ORF.length..nt.2	-0.161653	0.161653
scont1	length	-0.148597	0.148597
scont1	nstems	-0.148023	0.148023
scont1	lcds	-0.164988	0.164988
scont1	cdsAUel	-0.164832	0.164832
scont1	ene	0.153319	0.153319
scont1	nostems	-0.158505	0.158505
scont1	relstems	0.10611	0.10611
scont1	length.1	-0.156776	0.156776
scont1	lorf.1	-0.164988	0.164988
Number.of.introns1	First.intron.length1	0.999947	0.999947
Number.of.introns1	First.intron.GC1	0.999947	0.999947
Number.of.introns1	mRNA.half.life.short1	-0.0936032	0.0936032
Number.of.introns1	Ribosome.occupancy1	-0.122111	0.122111
Number.of.introns1	Ribosome.density..rb.kb.1	-0.126006	0.126006
Number.of.introns1	GO.0006350_TRANSCRIPTION1	0.111011	0.111011
Number.of.introns1	er1	-0.119153	0.119153
Number.of.introns1	PI	0.161582	0.161582
Number.of.introns1	CAI..Codon.Adaptation.Index.	-0.192013	0.192013
Number.of.introns1	CODON.BIAS	-0.209769	0.209769
Number.of.introns1	ASN	0.126693	0.126693
Number.of.introns1	CYS	0.209924	0.209924
Number.of.introns1	GLU	-0.127276	0.127276
Number.of.introns1	GLY	-0.128968	0.128968
Number.of.introns1	HIS	0.105195	0.105195
Number.of.introns1	ILE	0.0828324	0.0828324
Number.of.introns1	MET	0.0924517	0.0924517
Number.of.introns1	PHE	0.0835142	0.0835142
Number.of.introns1	SER	0.12684	0.12684
Number.of.introns1	TRP	-0.0995884	0.0995884
Number.of.introns1	FOP.SCORE..Frequency.of.Optimal.Codons.	-0.207546	0.207546
Number.of.introns1	GRAVY.SCORE..Hydropathicity.of.Protein.	0.111678	0.111678
Number.of.introns1	econt	-0.171777	0.171777
Number.of.introns1	ccont	0.095161	0.095161
Number.of.introns1	econtrel	-0.14333	0.14333
First.intron.length1	First.intron.GC1	0.999909	0.999909
First.intron.length1	mRNA.half.life.short1	-0.0942396	0.0942396
First.intron.length1	Ribosome.occupancy1	-0.122815	0.122815
First.intron.length1	Ribosome.density..rb.kb.1	-0.126607	0.126607
First.intron.length1	GO.0006350_TRANSCRIPTION1	0.110398	0.110398
First.intron.length1	er1	-0.119147	0.119147
First.intron.length1	PI	0.162074	0.162074
First.intron.length1	CAI..Codon.Adaptation.Index.	-0.192179	0.192179
First.intron.length1	CODON.BIAS	-0.209919	0.209919
First.intron.length1	ASN	0.125878	0.125878
First.intron.length1	CYS	0.210108	0.210108
First.intron.length1	GLU	-0.127298	0.127298
First.intron.length1	GLY	-0.129279	0.129279
First.intron.length1	HIS	0.103978	0.103978
First.intron.length1	ILE	0.0829088	0.0829088
First.intron.length1	MET	0.091947	0.091947
First.intron.length1	PHE	0.0826687	0.0826687
First.intron.length1	SER	0.126708	0.126708
First.intron.length1	TRP	-0.0995831	0.0995831
First.intron.length1	FOP.SCORE..Frequency.of.Optimal.Codons.	-0.207706	0.207706
[truncated: 3,175 more rows]

## Sheet: DS4_p-values
### P-values of correlations between features of the proteins and mRNA targets in Hogan et al.
chromosome1	strand1	2.05624e-153	2.05624e-153
chromosome1	start1	0.160189	0.160189
chromosome1	stop1	0.160189	0.160189
chromosome1	protlength1	6.6728e-20	6.6728e-20
chromosome1	pH1	7.05471e-17	7.05471e-17
chromosome1	kDa1	1.31706e-18	1.31706e-18
chromosome1	G1	0	0
chromosome1	A1	5.21492e-118	5.21492e-118
chromosome1	L1	6.79031e-137	6.79031e-137
chromosome1	M1	0.0073541	0.0073541
chromosome1	F1	3.97919e-198	3.97919e-198
chromosome1	W1	1.86728e-16	1.86728e-16
chromosome1	K1	1.15363e-23	1.15363e-23
chromosome1	Q1	1.5672e-251	1.5672e-251
chromosome1	E1	1.17046e-17	1.17046e-17
chromosome1	S1	0.000652871	0.000652871
chromosome1	P1	7.95265e-10	7.95265e-10
chromosome1	V1	3.3518e-59	3.3518e-59
chromosome1	I1	5.45447e-151	5.45447e-151
chromosome1	C1	1.71139e-09	1.71139e-09
chromosome1	Y1	1.64887e-92	1.64887e-92
chromosome1	H1	4.82751e-24	4.82751e-24
chromosome1	R1	4.24172e-33	4.24172e-33
chromosome1	N1	1.29730425322550e-312	1.2973042532255e-312
chromosome1	D1	0	0
chromosome1	T1	1.23096e-24	1.23096e-24
chromosome1	ncont1	9.28061e-83	9.28061e-83
chromosome1	scont1	0.00057926	0.00057926
chromosome1	Number.of.introns1	0.134214	0.134214
chromosome1	First.intron.length1	0.134851	0.134851
chromosome1	First.intron.GC1	0.144723	0.144723
chromosome1	mRNA.half.life.short1	7.4228e-41	7.4228e-41
chromosome1	Ribosome.occupancy1	3.75836e-69	3.75836e-69
chromosome1	Ribosome.density..rb.kb.1	1.44215e-107	1.44215e-107
chromosome1	ORF.length..nt.1	6.6728e-20	6.6728e-20
chromosome1	GO.0006350_TRANSCRIPTION1	1.94877e-07	1.94877e-07
chromosome1	GO.0006412_PROTEIN_BIOSYNTHESIS1	3.7444e-143	3.7444e-143
chromosome1	GO.0008150_BIOLOGICAL_PROCESS1	1.95919e-65	1.95919e-65
chromosome1	cyto1	1.46956e-07	1.46956e-07
chromosome1	mito1	0.501846	0.501846
chromosome1	er1	0.00600857	0.00600857
chromosome1	MOLECULAR.WEIGHT..in.Daltons.	1.31706e-18	1.31706e-18
chromosome1	PI	7.05471e-17	7.05471e-17
chromosome1	CAI..Codon.Adaptation.Index.	3.63339e-92	3.63339e-92
chromosome1	PROTEIN.LENGTH	6.6728e-20	6.6728e-20
chromosome1	CODON.BIAS	4.0743e-182	4.0743e-182
chromosome1	ALA	1.27879e-13	1.27879e-13
chromosome1	ARG	8.80869e-83	8.80869e-83
chromosome1	ASN	4.29461e-79	4.29461e-79
chromosome1	ASP	8.33581e-84	8.33581e-84
chromosome1	CYS	0.000689096	0.000689096
chromosome1	GLN	2.31396e-153	2.31396e-153
chromosome1	GLU	2.90464e-39	2.90464e-39
chromosome1	GLY	1.44286e-258	1.44286e-258
chromosome1	HIS	5.01217e-26	5.01217e-26
chromosome1	ILE	5.49513e-62	5.49513e-62
chromosome1	LEU	9.28857e-66	9.28857e-66
chromosome1	LYS	4.00131e-12	4.00131e-12
chromosome1	MET	0.552499	0.552499
chromosome1	PHE	1.18353e-55	1.18353e-55
chromosome1	PRO	7.2942e-37	7.2942e-37
chromosome1	SER	5.26329e-05	5.26329e-05
chromosome1	THR	1.02263e-11	1.02263e-11
chromosome1	TRP	7.56733e-30	7.56733e-30
chromosome1	TYR	2.34277e-19	2.34277e-19
chromosome1	VAL	1.32723e-15	1.32723e-15
chromosome1	FOP.SCORE..Frequency.of.Optimal.Codons.	1.26736e-179	1.26736e-179
chromosome1	GRAVY.SCORE..Hydropathicity.of.Protein.	2.85214e-05	2.85214e-05
chromosome1	AROMATICITY.SCORE..Frequency.of.aromatic.amino.acids..Phe..Tyr..Trp.	1.40194e-101	1.40194e-101
chromosome1	econt	7.52259e-98	7.52259e-98
chromosome1	ccont	7.95932e-14	7.95932e-14
chromosome1	hcont	2.25015e-81	2.25015e-81
chromosome1	econtrel	9.79813e-99	9.79813e-99
chromosome1	ccontrel	2.24171e-13	2.24171e-13
chromosome1	hcontrel	1.36357e-67	1.36357e-67
chromosome1	gene2	0.019263	0.019263
chromosome1	tfcode2	0.603368	0.603368
chromosome1	chromosome2	0.0215791	0.0215791
chromosome1	strand2	0.374017	0.374017
chromosome1	start2	0.678819	0.678819
chromosome1	stop2	0.682253	0.682253
chromosome1	protlength2	6.73003e-35	6.73003e-35
chromosome1	pH2	0.00231568	0.00231568
chromosome1	kDa2	3.02835e-35	3.02835e-35
chromosome1	G2	0.36505	0.36505
chromosome1	A2	0.205014	0.205014
chromosome1	L2	6.53751e-05	6.53751e-05
chromosome1	M2	0.386712	0.386712
chromosome1	F2	2.17264e-09	2.17264e-09
chromosome1	W2	0.000140135	0.000140135
chromosome1	K2	0.00309573	0.00309573
chromosome1	Q2	0.00390934	0.00390934
chromosome1	E2	0.159237	0.159237
chromosome1	S2	0.337445	0.337445
chromosome1	P2	0.403427	0.403427
chromosome1	V2	0.576487	0.576487
chromosome1	I2	0.000147505	0.000147505
chromosome1	C2	2.20355e-06	2.20355e-06
chromosome1	Y2	4.81296e-05	4.81296e-05
chromosome1	H2	0.539763	0.539763
chromosome1	R2	5.96081e-09	5.96081e-09
chromosome1	N2	0.0126455	0.0126455
chromosome1	D2	0.0236454	0.0236454
chromosome1	T2	0.837734	0.837734
chromosome1	ncont2	4.00409e-09	4.00409e-09
chromosome1	scont2	0.0107656	0.0107656
chromosome1	Number.of.introns2	0.000663978	0.000663978
chromosome1	First.intron.length2	0.000638386	0.000638386
chromosome1	First.intron.GC2	0.000720043	0.000720043
chromosome1	mRNA.half.life.short2	0.0714258	0.0714258
chromosome1	Ribosome.occupancy2	2.13257e-08	2.13257e-08
chromosome1	Ribosome.density..rb.kb.2	0.00177547	0.00177547
chromosome1	ORF.length..nt.2	5.03907e-34	5.03907e-34
chromosome1	GO.0006350_TRANSCRIPTION2	0.394536	0.394536
chromosome1	GO.0006412_PROTEIN_BIOSYNTHESIS2	3.47753e-05	3.47753e-05
chromosome1	GO.0007049_CELL_CYCLE2	0.469576	0.469576
chromosome1	GO.0007165_SIGNAL_TRANSDUCTION2	0.204838	0.204838
chromosome1	GO.0008150_BIOLOGICAL_PROCESS2	0.281772	0.281772
chromosome1	nuc2	0.133251	0.133251
chromosome1	vac2	0.0129034	0.0129034
chromosome1	cyto2	0.658306	0.658306
chromosome1	mito2	0.00102985	0.00102985
chromosome1	relinstems	3.28489e-08	3.28489e-08
chromosome1	length	3.08321e-35	3.08321e-35
chromosome1	relnostems	0.317311	0.317311
chromosome1	nstems	4.29972e-34	4.29972e-34
chromosome1	cs3	0.750733	0.750733
chromosome1	cs5	0.0408253	0.0408253
chromosome1	csorf	0.0265591	0.0265591
chromosome1	lu3	0.021363	0.021363
chromosome1	u3A	0.0292394	0.0292394
chromosome1	u3C	0.521307	0.521307
chromosome1	u3T	0.00222926	0.00222926
chromosome1	u3G	0.0740355	0.0740355
chromosome1	u3AC	0.728784	0.728784
chromosome1	u3AT	0.00610326	0.00610326
chromosome1	u3AG	0.0857302	0.0857302
chromosome1	u3CT	0.0134744	0.0134744
chromosome1	u3CG	0.127549	0.127549
chromosome1	u3TG	0.799271	0.799271
chromosome1	X3AUel	0.0281489	0.0281489
chromosome1	lu5	5.9694e-07	5.9694e-07
chromosome1	u5A	0.00058819	0.00058819
chromosome1	u5C	0.369981	0.369981
chromosome1	u5T	7.60936e-07	7.60936e-07
chromosome1	u5G	0.930569	0.930569
chromosome1	u5AC	0.0170628	0.0170628
chromosome1	u5AT	0.0399897	0.0399897
chromosome1	u5AG	0.722038	0.722038
chromosome1	u5CT	0.0205167	0.0205167
chromosome1	u5CG	0.406567	0.406567
chromosome1	u5TG	0.147938	0.147938
chromosome1	X5AUel	6.52332e-07	6.52332e-07
chromosome1	lcds	6.73003e-35	6.73003e-35
chromosome1	cdsA	0.0050348	0.0050348
chromosome1	cdsC	0.00061241	0.00061241
chromosome1	cdsT	4.30142e-22	4.30142e-22
chromosome1	cdsG	7.41873e-07	7.41873e-07
chromosome1	cdsAC	0.000282621	0.000282621
chromosome1	cdsAT	1.29731e-11	1.29731e-11
chromosome1	cdsAG	3.01476e-16	3.01476e-16
chromosome1	cdsCT	0.00122158	0.00122158
chromosome1	cdsCG	0.00017952	0.00017952
chromosome1	cdsTG	1.17476e-05	1.17476e-05
chromosome1	cdsAUel	8.85193e-35	8.85193e-35
chromosome1	ene	8.49175e-34	8.49175e-34
chromosome1	halflife	0.505582	0.505582
chromosome1	nostems	2.8577e-35	2.8577e-35
chromosome1	relstems	8.84517e-23	8.84517e-23
chromosome1	length.1	2.22921e-36	2.22921e-36
strand1	start1	2.66945e-30	2.66945e-30
strand1	stop1	2.66945e-30	2.66945e-30
strand1	protlength1	2.04799e-99	2.04799e-99
strand1	pH1	2.45808e-41	2.45808e-41
strand1	kDa1	1.52629e-91	1.52629e-91
strand1	G1	8.31538e-253	8.31538e-253
strand1	A1	1.4638e-70	1.4638e-70
strand1	L1	3.43685e-122	3.43685e-122
strand1	M1	1.64235e-261	1.64235e-261
strand1	F1	3.71457821103637e-317	3.71457821103637e-317
strand1	W1	0.133399	0.133399
strand1	K1	6.29703e-255	6.29703e-255
strand1	Q1	9.94247e-45	9.94247e-45
strand1	E1	1.111e-110	1.111e-110
strand1	S1	2.11644e-59	2.11644e-59
strand1	P1	6.52654e-157	6.52654e-157
strand1	V1	2.35049e-81	2.35049e-81
strand1	I1	1.06042e-209	1.06042e-209
strand1	C1	4.54003e-71	4.54003e-71
strand1	Y1	1.17185e-276	1.17185e-276
strand1	H1	2.40445e-218	2.40445e-218
strand1	R1	0.000922331	0.000922331
strand1	N1	0.000419277	0.000419277
strand1	D1	8.74151e-211	8.74151e-211
strand1	T1	3.13977e-284	3.13977e-284
strand1	ncont1	4.67132e-12	4.67132e-12
strand1	scont1	1.20764e-280	1.20764e-280
strand1	Number.of.introns1	1.51681e-15	1.51681e-15
strand1	First.intron.length1	1.52205e-15	1.52205e-15
strand1	First.intron.GC1	1.52205e-15	1.52205e-15
strand1	mRNA.half.life.short1	0	0
strand1	Ribosome.occupancy1	8.07925e-73	8.07925e-73
strand1	Ribosome.density..rb.kb.1	4.83054e-285	4.83054e-285
strand1	ORF.length..nt.1	2.04799e-99	2.04799e-99
strand1	GO.0006350_TRANSCRIPTION1	4.7629e-195	4.7629e-195
strand1	GO.0006412_PROTEIN_BIOSYNTHESIS1	1.66165e-132	1.66165e-132
strand1	GO.0008150_BIOLOGICAL_PROCESS1	1.22817e-34	1.22817e-34
strand1	cyto1	0	0
strand1	mito1	0.283906	0.283906
strand1	er1	1.37052e-54	1.37052e-54
strand1	MOLECULAR.WEIGHT..in.Daltons.	1.52629e-91	1.52629e-91
strand1	PI	2.45808e-41	2.45808e-41
strand1	CAI..Codon.Adaptation.Index.	0.000156276	0.000156276
strand1	PROTEIN.LENGTH	2.04799e-99	2.04799e-99
strand1	CODON.BIAS	3.85497e-15	3.85497e-15
strand1	ALA	1.52634e-09	1.52634e-09
strand1	ARG	2.20537e-197	2.20537e-197
strand1	ASN	2.06292e-39	2.06292e-39
strand1	ASP	0	0
strand1	CYS	8.56245e-06	8.56245e-06
strand1	GLN	2.2406e-29	2.2406e-29
strand1	GLU	1.12351e-151	1.12351e-151
strand1	GLY	0.0491396	0.0491396
strand1	HIS	8.43452e-06	8.43452e-06
strand1	ILE	1.37971e-253	1.37971e-253
strand1	LEU	5.51723e-210	5.51723e-210
strand1	LYS	2.09847e-253	2.09847e-253
strand1	MET	2.72837e-143	2.72837e-143
strand1	PHE	0.155958	0.155958
strand1	PRO	1.57232e-05	1.57232e-05
strand1	SER	3.86837e-79	3.86837e-79
strand1	THR	6.23718e-190	6.23718e-190
strand1	TRP	8.58227e-24	8.58227e-24
strand1	TYR	5.53147e-10	5.53147e-10
strand1	VAL	6.01221e-81	6.01221e-81
strand1	FOP.SCORE..Frequency.of.Optimal.Codons.	1.25657e-14	1.25657e-14
strand1	GRAVY.SCORE..Hydropathicity.of.Protein.	4.75909e-05	4.75909e-05
strand1	AROMATICITY.SCORE..Frequency.of.aromatic.amino.acids..Phe..Tyr..Trp.	3.89706e-284	3.89706e-284
strand1	econt	0.115701	0.115701
strand1	ccont	8.59483e-21	8.59483e-21
strand1	hcont	8.96119569008024e-317	8.96119569008024e-317
strand1	econtrel	8.58398e-117	8.58398e-117
strand1	ccontrel	9.00516e-71	9.00516e-71
strand1	hcontrel	3.187e-199	3.187e-199
strand1	gene2	0.00150989	0.00150989
strand1	tfcode2	0.631014	0.631014
strand1	chromosome2	0.00158958	0.00158958
strand1	strand2	0.656766	0.656766
strand1	start2	0.611151	0.611151
strand1	stop2	0.60642	0.60642
strand1	protlength2	7.43961e-45	7.43961e-45
strand1	pH2	7.41938e-10	7.41938e-10
strand1	kDa2	5.24225e-45	5.24225e-45
strand1	G2	0.0732065	0.0732065
strand1	A2	0.338328	0.338328
strand1	L2	0.144283	0.144283
strand1	M2	0.501633	0.501633
strand1	F2	0.374493	0.374493
strand1	W2	0.0063855	0.0063855
strand1	K2	0.138698	0.138698
strand1	Q2	0.166447	0.166447
strand1	E2	1.02372e-05	1.02372e-05
strand1	S2	0.955153	0.955153
strand1	P2	0.260849	0.260849
strand1	V2	0.289394	0.289394
strand1	I2	0.151495	0.151495
strand1	C2	0.0954069	0.0954069
strand1	Y2	0.0224348	0.0224348
strand1	H2	0.0666877	0.0666877
strand1	R2	0.000136974	0.000136974
strand1	N2	0.0408893	0.0408893
strand1	D2	1.76651e-10	1.76651e-10
strand1	T2	0.43498	0.43498
strand1	ncont2	1.0955e-05	1.0955e-05
strand1	scont2	0.973016	0.973016
strand1	Number.of.introns2	1.24539e-14	1.24539e-14
strand1	First.intron.length2	1.14844e-14	1.14844e-14
strand1	First.intron.GC2	4.5699e-14	4.5699e-14
strand1	mRNA.half.life.short2	0.0414196	0.0414196
strand1	Ribosome.occupancy2	3.48128e-05	3.48128e-05
strand1	Ribosome.density..rb.kb.2	1.79096e-05	1.79096e-05
strand1	ORF.length..nt.2	9.80136e-43	9.80136e-43
strand1	GO.0006350_TRANSCRIPTION2	0.7331	0.7331
strand1	GO.0006412_PROTEIN_BIOSYNTHESIS2	0.000908481	0.000908481
strand1	GO.0007049_CELL_CYCLE2	0.143123	0.143123
strand1	GO.0007165_SIGNAL_TRANSDUCTION2	0.190128	0.190128
strand1	GO.0008150_BIOLOGICAL_PROCESS2	0.00223794	0.00223794
strand1	nuc2	0.103402	0.103402
strand1	vac2	0.0229698	0.0229698
strand1	cyto2	0.339453	0.339453
strand1	mito2	0.000252811	0.000252811
strand1	relinstems	3.6768e-06	3.6768e-06
strand1	length	5.43985e-39	5.43985e-39
strand1	relnostems	0.183838	0.183838
strand1	nstems	9.12294e-40	9.12294e-40
strand1	cs3	0.70802	0.70802
strand1	cs5	0.265395	0.265395
strand1	csorf	0.408235	0.408235
strand1	lu3	0.344659	0.344659
strand1	u3A	0.260629	0.260629
strand1	u3C	0.314085	0.314085
strand1	u3T	0.373172	0.373172
strand1	u3G	0.445971	0.445971
strand1	u3AC	0.88048	0.88048
strand1	u3AT	0.746004	0.746004
strand1	u3AG	0.189447	0.189447
strand1	u3CT	0.284001	0.284001
strand1	u3CG	0.735352	0.735352
strand1	u3TG	0.096408	0.096408
strand1	X3AUel	0.364112	0.364112
strand1	lu5	0.0433616	0.0433616
strand1	u5A	0.0440734	0.0440734
strand1	u5C	0.374326	0.374326
strand1	u5T	0.00316586	0.00316586
strand1	u5G	0.16122	0.16122
strand1	u5AC	0.255822	0.255822
strand1	u5AT	0.0590405	0.0590405
strand1	u5AG	0.336004	0.336004
strand1	u5CT	0.270278	0.270278
strand1	u5CG	0.204258	0.204258
strand1	u5TG	0.164788	0.164788
strand1	X5AUel	0.040876	0.040876
strand1	lcds	7.43961e-45	7.43961e-45
strand1	cdsA	0.424922	0.424922
strand1	cdsC	8.13114e-10	8.13114e-10
strand1	cdsT	6.01498e-05	6.01498e-05
strand1	cdsG	0.440742	0.440742
strand1	cdsAC	0.00861288	0.00861288
strand1	cdsAT	5.40059e-06	5.40059e-06
strand1	cdsAG	0.00549061	0.00549061
strand1	cdsCT	0.0132468	0.0132468
strand1	cdsCG	0.133444	0.133444
strand1	cdsTG	0.000149613	0.000149613
strand1	cdsAUel	9.44492e-45	9.44492e-45
strand1	ene	3.10558e-42	3.10558e-42
strand1	halflife	0.011541	0.011541
strand1	nostems	2.3079e-43	2.3079e-43
strand1	relstems	2.08989e-22	2.08989e-22
strand1	length.1	1.10866e-41	1.10866e-41
start1	stop1	0	0
start1	protlength1	3.56896e-221	3.56896e-221
start1	pH1	1.22264e-37	1.22264e-37
start1	kDa1	1.73808e-214	1.73808e-214
start1	G1	1.06142e-50	1.06142e-50
start1	A1	6.30801e-125	6.30801e-125
start1	L1	2.5299e-77	2.5299e-77
start1	M1	1.6212e-58	1.6212e-58
start1	F1	0.457071	0.457071
start1	W1	0.657365	0.657365
start1	K1	1.33781e-09	1.33781e-09
start1	Q1	2.37994e-44	2.37994e-44
start1	E1	1.09235e-165	1.09235e-165
start1	S1	2.7817e-96	2.7817e-96
start1	P1	0.0411386	0.0411386
start1	V1	3.4302e-55	3.4302e-55
start1	I1	8.70398e-262	8.70398e-262
start1	C1	0	0
start1	Y1	0.00460471	0.00460471
start1	H1	0.000487675	0.000487675
start1	R1	2.55639e-75	2.55639e-75
start1	N1	4.09159e-52	4.09159e-52
start1	D1	0.611387	0.611387
start1	T1	0	0
start1	ncont1	8.26654e-200	8.26654e-200
start1	scont1	2.26968e-77	2.26968e-77
start1	Number.of.introns1	3.77368e-16	3.77368e-16
start1	First.intron.length1	3.50811e-16	3.50811e-16
start1	First.intron.GC1	6.4714e-16	6.4714e-16
start1	mRNA.half.life.short1	6.15134e-11	6.15134e-11
start1	Ribosome.occupancy1	2.50343e-160	2.50343e-160
start1	Ribosome.density..rb.kb.1	1.47886e-222	1.47886e-222
start1	ORF.length..nt.1	1.50544e-221	1.50544e-221
start1	GO.0006350_TRANSCRIPTION1	4.57872e-308	4.57872e-308
start1	GO.0006412_PROTEIN_BIOSYNTHESIS1	0.000250359	0.000250359
start1	GO.0008150_BIOLOGICAL_PROCESS1	9.81803e-43	9.81803e-43
start1	cyto1	1.50899e-14	1.50899e-14
start1	mito1	0.842969	0.842969
start1	er1	0.00974067	0.00974067
start1	MOLECULAR.WEIGHT..in.Daltons.	1.73808e-214	1.73808e-214
start1	PI	1.22264e-37	1.22264e-37
start1	CAI..Codon.Adaptation.Index.	1.72207e-233	1.72207e-233
start1	PROTEIN.LENGTH	3.56896e-221	3.56896e-221
start1	CODON.BIAS	1.3691e-281	1.3691e-281
start1	ALA	1.91651e-304	1.91651e-304
start1	ARG	2.13614e-38	2.13614e-38
start1	ASN	5.23183e-221	5.23183e-221
start1	ASP	1.35762e-153	1.35762e-153
start1	CYS	0	0
start1	GLN	0.000319062	0.000319062
start1	GLU	0.185909	0.185909
start1	GLY	0.00205874	0.00205874
start1	HIS	2.23305e-133	2.23305e-133
start1	ILE	0	0
start1	LEU	1.16477e-160	1.16477e-160
start1	LYS	3.34495e-52	3.34495e-52
start1	MET	6.25931e-60	6.25931e-60
start1	PHE	1.02023e-133	1.02023e-133
start1	PRO	2.14204e-82	2.14204e-82
start1	SER	2.36279e-192	2.36279e-192
start1	THR	0	0
start1	TRP	1.35062e-56	1.35062e-56
start1	TYR	3.90114e-163	3.90114e-163
start1	VAL	6.83653e-198	6.83653e-198
start1	FOP.SCORE..Frequency.of.Optimal.Codons.	3.02526e-281	3.02526e-281
start1	GRAVY.SCORE..Hydropathicity.of.Protein.	0	0
start1	AROMATICITY.SCORE..Frequency.of.aromatic.amino.acids..Phe..Tyr..Trp.	0.0614701	0.0614701
start1	econt	6.01578e-63	6.01578e-63
start1	ccont	7.32692e-204	7.32692e-204
start1	hcont	9.63458e-110	9.63458e-110
start1	econtrel	1.78625e-23	1.78625e-23
start1	ccontrel	2.21792e-07	2.21792e-07
start1	hcontrel	9.25445e-25	9.25445e-25
start1	gene2	0.00897259	0.00897259
start1	tfcode2	0.864481	0.864481
start1	chromosome2	0.00708193	0.00708193
start1	strand2	0.496666	0.496666
start1	start2	0.55717	0.55717
start1	stop2	0.560129	0.560129
start1	protlength2	0.000109605	0.000109605
start1	pH2	0.248834	0.248834
start1	kDa2	0.000191576	0.000191576
start1	G2	0.918096	0.918096
start1	A2	0.961496	0.961496
start1	L2	0.251716	0.251716
start1	M2	0.0330713	0.0330713
start1	F2	0.673831	0.673831
start1	W2	0.470069	0.470069
start1	K2	0.0012548	0.0012548
start1	Q2	0.211395	0.211395
start1	E2	0.000632881	0.000632881
start1	S2	0.000260453	0.000260453
start1	P2	0.0940279	0.0940279
start1	V2	0.657077	0.657077
start1	I2	0.926594	0.926594
start1	C2	0.142404	0.142404
start1	Y2	0.0908952	0.0908952
start1	H2	0.776678	0.776678
start1	R2	2.71426e-05	2.71426e-05
start1	N2	0.236427	0.236427
start1	D2	0.789425	0.789425
start1	T2	0.12344	0.12344
start1	ncont2	0.000330988	0.000330988
start1	scont2	0.428542	0.428542
start1	Number.of.introns2	0.767251	0.767251
start1	First.intron.length2	0.771326	0.771326
start1	First.intron.GC2	0.702195	0.702195
start1	mRNA.half.life.short2	0.420297	0.420297
start1	Ribosome.occupancy2	4.98639e-06	4.98639e-06
start1	Ribosome.density..rb.kb.2	0.0078207	0.0078207
start1	ORF.length..nt.2	7.83088e-05	7.83088e-05
start1	GO.0006350_TRANSCRIPTION2	0.155129	0.155129
start1	GO.0006412_PROTEIN_BIOSYNTHESIS2	0.110747	0.110747
start1	GO.0007049_CELL_CYCLE2	0.533387	0.533387
start1	GO.0007165_SIGNAL_TRANSDUCTION2	0.938306	0.938306
start1	GO.0008150_BIOLOGICAL_PROCESS2	0.990724	0.990724
start1	nuc2	0.378104	0.378104
start1	vac2	0.151445	0.151445
start1	cyto2	0.855468	0.855468
start1	mito2	0.004936	0.004936
start1	relinstems	0.0923275	0.0923275
start1	length	8.59691e-06	8.59691e-06
start1	relnostems	0.0296221	0.0296221
start1	nstems	2.72266e-05	2.72266e-05
start1	cs3	0.493744	0.493744
start1	cs5	0.0293825	0.0293825
start1	csorf	0.0381887	0.0381887
start1	lu3	0.372994	0.372994
start1	u3A	0.845815	0.845815
start1	u3C	0.135568	0.135568
start1	u3T	0.761472	0.761472
start1	u3G	0.303711	0.303711
start1	u3AC	0.550616	0.550616
start1	u3AT	0.00549229	0.00549229
start1	u3AG	0.474483	0.474483
start1	u3CT	0.0858091	0.0858091
start1	u3CG	0.443769	0.443769
start1	u3TG	0.345097	0.345097
start1	X3AUel	0.369066	0.369066
start1	lu5	0.00339829	0.00339829
start1	u5A	0.160189	0.160189
start1	u5C	0.752201	0.752201
start1	u5T	0.00383118	0.00383118
start1	u5G	0.00164169	0.00164169
start1	u5AC	0.10129	0.10129
start1	u5AT	0.135729	0.135729
start1	u5AG	0.221073	0.221073
start1	u5CT	0.0400525	0.0400525
start1	u5CG	0.172847	0.172847
start1	u5TG	0.868543	0.868543
start1	X5AUel	0.00323483	0.00323483
start1	lcds	0.000109605	0.000109605
start1	cdsA	0.0114607	0.0114607
start1	cdsC	0.0058898	0.0058898
start1	cdsT	0.026089	0.026089
start1	cdsG	5.42116e-06	5.42116e-06
start1	cdsAC	0.0968408	0.0968408
start1	cdsAT	0.514506	0.514506
start1	cdsAG	2.99252e-06	2.99252e-06
start1	cdsCT	2.81298e-05	2.81298e-05
start1	cdsCG	0.59606	0.59606
start1	cdsTG	0.187017	0.187017
start1	cdsAUel	0.00010724	0.00010724
start1	ene	0.000191462	0.000191462
start1	halflife	0.516818	0.516818
start1	nostems	0.000181801	0.000181801
start1	relstems	0.000348177	0.000348177
start1	length.1	2.66936e-05	2.66936e-05
stop1	protlength1	3.56896e-221	3.56896e-221
stop1	pH1	1.22264e-37	1.22264e-37
stop1	kDa1	1.73808e-214	1.73808e-214
stop1	G1	1.06142e-50	1.06142e-50
stop1	A1	6.30801e-125	6.30801e-125
stop1	L1	2.5299e-77	2.5299e-77
stop1	M1	1.6212e-58	1.6212e-58
stop1	F1	0.457071	0.457071
stop1	W1	0.657365	0.657365
stop1	K1	1.33781e-09	1.33781e-09
stop1	Q1	2.37994e-44	2.37994e-44
stop1	E1	1.09235e-165	1.09235e-165
stop1	S1	2.7817e-96	2.7817e-96
stop1	P1	0.0411386	0.0411386
stop1	V1	3.4302e-55	3.4302e-55
stop1	I1	8.70398e-262	8.70398e-262
stop1	C1	0	0
stop1	Y1	0.00460471	0.00460471
stop1	H1	0.000487675	0.000487675
stop1	R1	2.55639e-75	2.55639e-75
stop1	N1	4.09159e-52	4.09159e-52
stop1	D1	0.611387	0.611387
stop1	T1	0	0
stop1	ncont1	8.26654e-200	8.26654e-200
stop1	scont1	2.26968e-77	2.26968e-77
stop1	Number.of.introns1	3.77368e-16	3.77368e-16
stop1	First.intron.length1	3.50811e-16	3.50811e-16
stop1	First.intron.GC1	6.4714e-16	6.4714e-16
stop1	mRNA.half.life.short1	6.15134e-11	6.15134e-11
stop1	Ribosome.occupancy1	2.50343e-160	2.50343e-160
stop1	Ribosome.density..rb.kb.1	1.47886e-222	1.47886e-222
stop1	ORF.length..nt.1	1.50544e-221	1.50544e-221
stop1	GO.0006350_TRANSCRIPTION1	4.57872e-308	4.57872e-308
stop1	GO.0006412_PROTEIN_BIOSYNTHESIS1	0.000250359	0.000250359
stop1	GO.0008150_BIOLOGICAL_PROCESS1	9.81803e-43	9.81803e-43
stop1	cyto1	1.50899e-14	1.50899e-14
stop1	mito1	0.842969	0.842969
stop1	er1	0.00974067	0.00974067
stop1	MOLECULAR.WEIGHT..in.Daltons.	1.73808e-214	1.73808e-214
stop1	PI	1.22264e-37	1.22264e-37
stop1	CAI..Codon.Adaptation.Index.	1.72207e-233	1.72207e-233
stop1	PROTEIN.LENGTH	3.56896e-221	3.56896e-221
stop1	CODON.BIAS	1.3691e-281	1.3691e-281
stop1	ALA	1.91651e-304	1.91651e-304
stop1	ARG	2.13614e-38	2.13614e-38
stop1	ASN	5.23183e-221	5.23183e-221
stop1	ASP	1.35762e-153	1.35762e-153
stop1	CYS	0	0
stop1	GLN	0.000319062	0.000319062
stop1	GLU	0.185909	0.185909
stop1	GLY	0.00205874	0.00205874
stop1	HIS	2.23305e-133	2.23305e-133
stop1	ILE	0	0
stop1	LEU	1.16477e-160	1.16477e-160
stop1	LYS	3.34495e-52	3.34495e-52
stop1	MET	6.25931e-60	6.25931e-60
stop1	PHE	1.02023e-133	1.02023e-133
stop1	PRO	2.14204e-82	2.14204e-82
stop1	SER	2.36279e-192	2.36279e-192
stop1	THR	0	0
stop1	TRP	1.35062e-56	1.35062e-56
stop1	TYR	3.90114e-163	3.90114e-163
stop1	VAL	6.83653e-198	6.83653e-198
stop1	FOP.SCORE..Frequency.of.Optimal.Codons.	3.02526e-281	3.02526e-281
stop1	GRAVY.SCORE..Hydropathicity.of.Protein.	0	0
stop1	AROMATICITY.SCORE..Frequency.of.aromatic.amino.acids..Phe..Tyr..Trp.	0.0614701	0.0614701
stop1	econt	6.01578e-63	6.01578e-63
stop1	ccont	7.32692e-204	7.32692e-204
stop1	hcont	9.63458e-110	9.63458e-110
stop1	econtrel	1.78625e-23	1.78625e-23
stop1	ccontrel	2.21792e-07	2.21792e-07
stop1	hcontrel	9.25445e-25	9.25445e-25
stop1	gene2	0.00897259	0.00897259
stop1	tfcode2	0.864481	0.864481
stop1	chromosome2	0.00708193	0.00708193
stop1	strand2	0.496666	0.496666
stop1	start2	0.55717	0.55717
stop1	stop2	0.560129	0.560129
stop1	protlength2	0.000109605	0.000109605
stop1	pH2	0.248834	0.248834
stop1	kDa2	0.000191576	0.000191576
stop1	G2	0.918096	0.918096
stop1	A2	0.961496	0.961496
stop1	L2	0.251716	0.251716
stop1	M2	0.0330713	0.0330713
stop1	F2	0.673831	0.673831
stop1	W2	0.470069	0.470069
stop1	K2	0.0012548	0.0012548
stop1	Q2	0.211395	0.211395
stop1	E2	0.000632881	0.000632881
stop1	S2	0.000260453	0.000260453
stop1	P2	0.0940279	0.0940279
stop1	V2	0.657077	0.657077
stop1	I2	0.926594	0.926594
stop1	C2	0.142404	0.142404
stop1	Y2	0.0908952	0.0908952
stop1	H2	0.776678	0.776678
stop1	R2	2.71426e-05	2.71426e-05
stop1	N2	0.236427	0.236427
stop1	D2	0.789425	0.789425
stop1	T2	0.12344	0.12344
stop1	ncont2	0.000330988	0.000330988
stop1	scont2	0.428542	0.428542
stop1	Number.of.introns2	0.767251	0.767251
stop1	First.intron.length2	0.771326	0.771326
stop1	First.intron.GC2	0.702195	0.702195
stop1	mRNA.half.life.short2	0.420297	0.420297
stop1	Ribosome.occupancy2	4.98639e-06	4.98639e-06
stop1	Ribosome.density..rb.kb.2	0.0078207	0.0078207
stop1	ORF.length..nt.2	7.83088e-05	7.83088e-05
stop1	GO.0006350_TRANSCRIPTION2	0.155129	0.155129
stop1	GO.0006412_PROTEIN_BIOSYNTHESIS2	0.110747	0.110747
stop1	GO.0007049_CELL_CYCLE2	0.533387	0.533387
stop1	GO.0007165_SIGNAL_TRANSDUCTION2	0.938306	0.938306
stop1	GO.0008150_BIOLOGICAL_PROCESS2	0.990724	0.990724
stop1	nuc2	0.378104	0.378104
stop1	vac2	0.151445	0.151445
stop1	cyto2	0.855468	0.855468
stop1	mito2	0.004936	0.004936
stop1	relinstems	0.0923275	0.0923275
stop1	length	8.59691e-06	8.59691e-06
stop1	relnostems	0.0296221	0.0296221
stop1	nstems	2.72266e-05	2.72266e-05
stop1	cs3	0.493744	0.493744
stop1	cs5	0.0293825	0.0293825
stop1	csorf	0.0381887	0.0381887
stop1	lu3	0.372994	0.372994
stop1	u3A	0.845815	0.845815
stop1	u3C	0.135568	0.135568
stop1	u3T	0.761472	0.761472
stop1	u3G	0.303711	0.303711
stop1	u3AC	0.550616	0.550616
stop1	u3AT	0.00549229	0.00549229
stop1	u3AG	0.474483	0.474483
stop1	u3CT	0.0858091	0.0858091
stop1	u3CG	0.443769	0.443769
stop1	u3TG	0.345097	0.345097
stop1	X3AUel	0.369066	0.369066
stop1	lu5	0.00339829	0.00339829
stop1	u5A	0.160189	0.160189
stop1	u5C	0.752201	0.752201
stop1	u5T	0.00383118	0.00383118
stop1	u5G	0.00164169	0.00164169
stop1	u5AC	0.10129	0.10129
stop1	u5AT	0.135729	0.135729
stop1	u5AG	0.221073	0.221073
stop1	u5CT	0.0400525	0.0400525
stop1	u5CG	0.172847	0.172847
stop1	u5TG	0.868543	0.868543
stop1	X5AUel	0.00323483	0.00323483
stop1	lcds	0.000109605	0.000109605
stop1	cdsA	0.0114607	0.0114607
stop1	cdsC	0.0058898	0.0058898
stop1	cdsT	0.026089	0.026089
stop1	cdsG	5.42116e-06	5.42116e-06
stop1	cdsAC	0.0968408	0.0968408
stop1	cdsAT	0.514506	0.514506
stop1	cdsAG	2.99252e-06	2.99252e-06
stop1	cdsCT	2.81298e-05	2.81298e-05
stop1	cdsCG	0.59606	0.59606
stop1	cdsTG	0.187017	0.187017
stop1	cdsAUel	0.00010724	0.00010724
stop1	ene	0.000191462	0.000191462
stop1	halflife	0.516818	0.516818
stop1	nostems	0.000181801	0.000181801
stop1	relstems	0.000348177	0.000348177
stop1	length.1	2.66936e-05	2.66936e-05
protlength1	pH1	4.61882e-59	4.61882e-59
protlength1	kDa1	0	0
protlength1	G1	5.46703e-223	5.46703e-223
protlength1	A1	3.3047e-142	3.3047e-142
protlength1	L1	4.36646e-255	4.36646e-255
protlength1	M1	6.40048e-23	6.40048e-23
protlength1	F1	4.73235e-23	4.73235e-23
protlength1	W1	1.70544e-06	1.70544e-06
protlength1	K1	8.15926e-151	8.15926e-151
protlength1	Q1	2.28226e-14	2.28226e-14
protlength1	E1	5.0174e-25	5.0174e-25
protlength1	S1	1.04328e-16	1.04328e-16
protlength1	P1	9.89913e-11	9.89913e-11
protlength1	V1	2.02928e-148	2.02928e-148
protlength1	I1	6.20506e-198	6.20506e-198
protlength1	C1	2.93981e-12	2.93981e-12
protlength1	Y1	0.0723007	0.0723007
protlength1	H1	3.25719e-12	3.25719e-12
protlength1	R1	0	0
protlength1	N1	1.30234e-09	1.30234e-09
protlength1	D1	6.09816e-25	6.09816e-25
protlength1	T1	0	0
protlength1	ncont1	9.88885e-251	9.88885e-251
protlength1	scont1	7.71179e-13	7.71179e-13
protlength1	Number.of.introns1	1.42247e-06	1.42247e-06
protlength1	First.intron.length1	1.49611e-06	1.49611e-06
protlength1	First.intron.GC1	1.87044e-06	1.87044e-06
protlength1	mRNA.half.life.short1	3.62995e-91	3.62995e-91
protlength1	Ribosome.occupancy1	1.20013e-116	1.20013e-116
protlength1	Ribosome.density..rb.kb.1	1.42511e-164	1.42511e-164
protlength1	ORF.length..nt.1	0	0
protlength1	GO.0006350_TRANSCRIPTION1	0	0
protlength1	GO.0006412_PROTEIN_BIOSYNTHESIS1	1.46607e-54	1.46607e-54
protlength1	GO.0008150_BIOLOGICAL_PROCESS1	2.57077e-26	2.57077e-26
protlength1	cyto1	0.00532171	0.00532171
protlength1	mito1	0.0911668	0.0911668
protlength1	er1	2.07547e-271	2.07547e-271
protlength1	MOLECULAR.WEIGHT..in.Daltons.	0	0
protlength1	PI	4.61882e-59	4.61882e-59
protlength1	CAI..Codon.Adaptation.Index.	6.11302e-08	6.11302e-08
protlength1	PROTEIN.LENGTH	0	0
protlength1	CODON.BIAS	8.93619e-19	8.93619e-19
protlength1	ALA	0	0
protlength1	ARG	1.9637e-171	1.9637e-171
protlength1	ASN	0	0
protlength1	ASP	0	0
protlength1	CYS	8.0179403810095e-317	8.0179403810095e-317
protlength1	GLN	3.13806e-60	3.13806e-60
protlength1	GLU	1.77608e-218	1.77608e-218
protlength1	GLY	6.32915e-113	6.32915e-113
protlength1	HIS	0	0
protlength1	ILE	0	0
protlength1	LEU	0	0
protlength1	LYS	0	0
protlength1	MET	3.19325e-149	3.19325e-149
protlength1	PHE	0	0
protlength1	PRO	0	0
protlength1	SER	0	0
protlength1	THR	0	0
protlength1	TRP	2.71342e-77	2.71342e-77
protlength1	TYR	0	0
protlength1	VAL	0	0
protlength1	FOP.SCORE..Frequency.of.Optimal.Codons.	2.44424e-17	2.44424e-17
protlength1	GRAVY.SCORE..Hydropathicity.of.Protein.	0	0
protlength1	AROMATICITY.SCORE..Frequency.of.aromatic.amino.acids..Phe..Tyr..Trp.	3.42297e-29	3.42297e-29
protlength1	econt	1.89258e-193	1.89258e-193
protlength1	ccont	0	0
protlength1	hcont	0	0
protlength1	econtrel	5.26991e-08	5.26991e-08
protlength1	ccontrel	1.0078e-107	1.0078e-107
protlength1	hcontrel	2.45644e-245	2.45644e-245
protlength1	gene2	0.60534	0.60534
protlength1	tfcode2	0.363314	0.363314
protlength1	chromosome2	0.589436	0.589436
protlength1	strand2	0.61914	0.61914
protlength1	start2	0.616372	0.616372
protlength1	stop2	0.618248	0.618248
protlength1	protlength2	2.41949e-27	2.41949e-27
protlength1	pH2	0.00547942	0.00547942
protlength1	kDa2	3.07857e-27	3.07857e-27
protlength1	G2	0.0889624	0.0889624
protlength1	A2	0.703597	0.703597
protlength1	L2	0.0533753	0.0533753
protlength1	M2	0.0324739	0.0324739
protlength1	F2	0.00409169	0.00409169
protlength1	W2	0.0637448	0.0637448
protlength1	K2	0.0789651	0.0789651
protlength1	Q2	0.0159743	0.0159743
protlength1	E2	0.758259	0.758259
protlength1	S2	0.588981	0.588981
protlength1	P2	0.725832	0.725832
protlength1	V2	0.201645	0.201645
protlength1	I2	0.00233339	0.00233339
protlength1	C2	0.38905	0.38905
protlength1	Y2	0.0659668	0.0659668
protlength1	H2	0.158742	0.158742
protlength1	R2	0.00132672	0.00132672
protlength1	N2	0.56609	0.56609
protlength1	D2	0.00924671	0.00924671
protlength1	T2	0.428087	0.428087
protlength1	ncont2	5.34757e-05	5.34757e-05
protlength1	scont2	0.0488478	0.0488478
protlength1	Number.of.introns2	3.83816e-05	3.83816e-05
protlength1	First.intron.length2	2.33494e-05	2.33494e-05
protlength1	First.intron.GC2	8.08166e-05	8.08166e-05
protlength1	mRNA.half.life.short2	0.305124	0.305124
protlength1	Ribosome.occupancy2	4.84113e-06	4.84113e-06
protlength1	Ribosome.density..rb.kb.2	0.00202244	0.00202244
protlength1	ORF.length..nt.2	8.72655e-28	8.72655e-28
protlength1	GO.0006350_TRANSCRIPTION2	0.754579	0.754579
protlength1	GO.0006412_PROTEIN_BIOSYNTHESIS2	0.232541	0.232541
protlength1	GO.0007049_CELL_CYCLE2	0.922429	0.922429
protlength1	GO.0007165_SIGNAL_TRANSDUCTION2	0.990322	0.990322
protlength1	GO.0008150_BIOLOGICAL_PROCESS2	0.379172	0.379172
protlength1	nuc2	0.376811	0.376811
protlength1	vac2	0.046289	0.046289
protlength1	cyto2	0.922531	0.922531
protlength1	mito2	0.00025061	0.00025061
protlength1	relinstems	3.91167e-10	3.91167e-10
protlength1	length	2.91372e-28	2.91372e-28
protlength1	relnostems	0.557195	0.557195
protlength1	nstems	9.81461e-28	9.81461e-28
protlength1	cs3	0.668874	0.668874
protlength1	cs5	0.0675935	0.0675935
protlength1	csorf	0.0709374	0.0709374
protlength1	lu3	0.822629	0.822629
protlength1	u3A	0.500376	0.500376
protlength1	u3C	0.216858	0.216858
protlength1	u3T	0.654804	0.654804
protlength1	u3G	0.554599	0.554599
protlength1	u3AC	0.315646	0.315646
protlength1	u3AT	0.244971	0.244971
protlength1	u3AG	0.598142	0.598142
protlength1	u3CT	0.538433	0.538433
protlength1	u3CG	0.243647	0.243647
protlength1	u3TG	0.893324	0.893324
protlength1	X3AUel	0.837052	0.837052
protlength1	lu5	0.000837262	0.000837262
protlength1	u5A	0.132858	0.132858
protlength1	u5C	0.441108	0.441108
protlength1	u5T	0.000350276	0.000350276
protlength1	u5G	0.107556	0.107556
protlength1	u5AC	0.382861	0.382861
protlength1	u5AT	0.0978181	0.0978181
protlength1	u5AG	0.871334	0.871334
protlength1	u5CT	0.0743106	0.0743106
protlength1	u5CG	0.60852	0.60852
protlength1	u5TG	0.831545	0.831545
protlength1	X5AUel	0.000883958	0.000883958
protlength1	lcds	2.41949e-27	2.41949e-27
protlength1	cdsA	0.0255486	0.0255486
protlength1	cdsC	0.00336326	0.00336326
protlength1	cdsT	2.28606e-13	2.28606e-13
protlength1	cdsG	0.00188171	0.00188171
protlength1	cdsAC	0.000302634	0.000302634
protlength1	cdsAT	0.00158537	0.00158537
protlength1	cdsAG	1.76339e-07	1.76339e-07
protlength1	cdsCT	0.00190595	0.00190595
protlength1	cdsCG	0.000359934	0.000359934
protlength1	cdsTG	3.06946e-05	3.06946e-05
protlength1	cdsAUel	2.8121e-27	2.8121e-27
protlength1	ene	9.40384e-26	9.40384e-26
protlength1	halflife	0.00501623	0.00501623
protlength1	nostems	2.63448e-26	2.63448e-26
protlength1	relstems	5.45711e-16	5.45711e-16
protlength1	length.1	1.35862e-26	1.35862e-26
pH1	kDa1	4.74335e-62	4.74335e-62
pH1	G1	8.57408e-295	8.57408e-295
pH1	A1	2.9134e-18	2.9134e-18
pH1	L1	0	0
pH1	M1	9.16706e-121	9.16706e-121
pH1	F1	7.79928e-112	7.79928e-112
pH1	W1	2.99013e-210	2.99013e-210
pH1	K1	2.30008e-230	2.30008e-230
pH1	Q1	0.00567629	0.00567629
pH1	E1	0.00953613	0.00953613
pH1	S1	2.4369e-47	2.4369e-47
pH1	P1	4.57385e-94	4.57385e-94
pH1	V1	8.74677e-26	8.74677e-26
pH1	I1	5.54693e-130	5.54693e-130
pH1	C1	0.284992	0.284992
pH1	Y1	6.81468e-06	6.81468e-06
pH1	H1	2.88834e-08	2.88834e-08
pH1	R1	1.56293e-10	1.56293e-10
pH1	N1	0.00120864	0.00120864
pH1	D1	6.76043e-11	6.76043e-11
pH1	T1	5.28014e-213	5.28014e-213
pH1	ncont1	7.17726e-43	7.17726e-43
pH1	scont1	4.74193e-74	4.74193e-74
pH1	Number.of.introns1	4.56508e-22	4.56508e-22
pH1	First.intron.length1	3.41012e-22	3.41012e-22
pH1	First.intron.GC1	3.83691e-22	3.83691e-22
pH1	mRNA.half.life.short1	6.8664e-106	6.8664e-106
pH1	Ribosome.occupancy1	8.66827e-08	8.66827e-08
pH1	Ribosome.density..rb.kb.1	4.0238e-101	4.0238e-101
pH1	ORF.length..nt.1	7.95237e-58	7.95237e-58
pH1	GO.0006350_TRANSCRIPTION1	0.00509586	0.00509586
pH1	GO.0006412_PROTEIN_BIOSYNTHESIS1	4.11295e-14	4.11295e-14
pH1	GO.0008150_BIOLOGICAL_PROCESS1	0.573778	0.573778
pH1	cyto1	1.36245e-13	1.36245e-13
pH1	mito1	0.269505	0.269505
pH1	er1	5.99959e-104	5.99959e-104
pH1	MOLECULAR.WEIGHT..in.Daltons.	4.74335e-62	4.74335e-62
pH1	PI	0	0
pH1	CAI..Codon.Adaptation.Index.	0.0167773	0.0167773
pH1	PROTEIN.LENGTH	4.61882e-59	4.61882e-59
pH1	CODON.BIAS	1.89152e-11	1.89152e-11
pH1	ALA	0.053301	0.053301
pH1	ARG	0.0314958	0.0314958
pH1	ASN	1.48148e-06	1.48148e-06
pH1	ASP	9.73158e-132	9.73158e-132
pH1	CYS	3.17821e-09	3.17821e-09
pH1	GLN	0.185037	0.185037
pH1	GLU	0.373984	0.373984
pH1	GLY	1.21087e-152	1.21087e-152
pH1	HIS	0.361462	0.361462
pH1	ILE	1.58726e-166	1.58726e-166
pH1	LEU	1.48654471520714e-319	1.48654471520714e-319
pH1	LYS	4.88874e-187	4.88874e-187
pH1	MET	1.90136e-126	1.90136e-126
pH1	PHE	2.47383e-52	2.47383e-52
pH1	PRO	9.73984e-13	9.73984e-13
pH1	SER	6.77434e-09	6.77434e-09
pH1	THR	5.68252e-95	5.68252e-95
pH1	TRP	6.59513e-74	6.59513e-74
pH1	TYR	0.855483	0.855483
pH1	VAL	6.74647e-71	6.74647e-71
pH1	FOP.SCORE..Frequency.of.Optimal.Codons.	1.30779e-11	1.30779e-11
pH1	GRAVY.SCORE..Hydropathicity.of.Protein.	2.53889e-63	2.53889e-63
pH1	AROMATICITY.SCORE..Frequency.of.aromatic.amino.acids..Phe..Tyr..Trp.	1.9762e-92	1.9762e-92
pH1	econt	1.99628e-119	1.99628e-119
pH1	ccont	1.57099e-09	1.57099e-09
pH1	hcont	2.93944e-235	2.93944e-235
pH1	econtrel	2.2889e-132	2.2889e-132
pH1	ccontrel	1.17794e-154	1.17794e-154
pH1	hcontrel	0	0
pH1	gene2	0.761098	0.761098
pH1	tfcode2	0.510717	0.510717
pH1	chromosome2	0.719239	0.719239
pH1	strand2	0.306897	0.306897
pH1	start2	0.446185	0.446185
pH1	stop2	0.443675	0.443675
pH1	protlength2	5.67007e-27	5.67007e-27
pH1	pH2	4.76937e-05	4.76937e-05
pH1	kDa2	8.15731e-27	8.15731e-27
pH1	G2	0.0787058	0.0787058
pH1	A2	0.637858	0.637858
pH1	L2	0.445373	0.445373
pH1	M2	0.404405	0.404405
pH1	F2	0.806224	0.806224
pH1	W2	0.443822	0.443822
pH1	K2	0.225104	0.225104
pH1	Q2	0.562011	0.562011
pH1	E2	0.11741	0.11741
pH1	S2	0.00235944	0.00235944
pH1	P2	0.305571	0.305571
pH1	V2	0.119678	0.119678
pH1	I2	0.252964	0.252964
pH1	C2	0.692904	0.692904
pH1	Y2	0.808035	0.808035
pH1	H2	0.334126	0.334126
pH1	R2	0.0018093	0.0018093
pH1	N2	0.000602562	0.000602562
pH1	D2	6.55306e-06	6.55306e-06
pH1	T2	0.0509382	0.0509382
pH1	ncont2	0.0158688	0.0158688
pH1	scont2	0.0609346	0.0609346
pH1	Number.of.introns2	0.00214216	0.00214216
pH1	First.intron.length2	0.00218563	0.00218563
pH1	First.intron.GC2	0.00229978	0.00229978
pH1	mRNA.half.life.short2	0.686105	0.686105
pH1	Ribosome.occupancy2	9.89584e-09	9.89584e-09
pH1	Ribosome.density..rb.kb.2	1.68355e-06	1.68355e-06
pH1	ORF.length..nt.2	2.89319e-27	2.89319e-27
pH1	GO.0006350_TRANSCRIPTION2	0.123927	0.123927
pH1	GO.0006412_PROTEIN_BIOSYNTHESIS2	0.0174348	0.0174348
pH1	GO.0007049_CELL_CYCLE2	0.955564	0.955564
pH1	GO.0007165_SIGNAL_TRANSDUCTION2	0.546522	0.546522
pH1	GO.0008150_BIOLOGICAL_PROCESS2	0.575692	0.575692
pH1	nuc2	0.658632	0.658632
pH1	vac2	0.0357492	0.0357492
pH1	cyto2	0.856722	0.856722
pH1	mito2	0.00105403	0.00105403
pH1	relinstems	0.212982	0.212982
pH1	length	7.36573e-26	7.36573e-26
pH1	relnostems	0.195413	0.195413
pH1	nstems	3.36872e-25	3.36872e-25
pH1	cs3	0.950744	0.950744
pH1	cs5	0.629015	0.629015
pH1	csorf	0.00636305	0.00636305
pH1	lu3	0.680929	0.680929
pH1	u3A	0.000404378	0.000404378
pH1	u3C	0.54513	0.54513
pH1	u3T	0.000559876	0.000559876
pH1	u3G	0.485232	0.485232
pH1	u3AC	0.134215	0.134215
pH1	u3AT	0.8407	0.8407
pH1	u3AG	0.218613	0.218613
pH1	u3CT	0.502643	0.502643
pH1	u3CG	0.662322	0.662322
pH1	u3TG	0.0624306	0.0624306
pH1	X3AUel	0.631604	0.631604
pH1	lu5	0.0043043	0.0043043
pH1	u5A	0.0717483	0.0717483
pH1	u5C	0.336498	0.336498
pH1	u5T	0.00111472	0.00111472
pH1	u5G	0.321274	0.321274
pH1	u5AC	0.6844	0.6844
pH1	u5AT	0.0675563	0.0675563
pH1	u5AG	0.273733	0.273733
pH1	u5CT	0.329278	0.329278
pH1	u5CG	0.834944	0.834944
pH1	u5TG	0.186632	0.186632
pH1	X5AUel	0.0043889	0.0043889
pH1	lcds	5.67007e-27	5.67007e-27
pH1	cdsA	0.0264655	0.0264655
pH1	cdsC	0.0944295	0.0944295
pH1	cdsT	0.0012072	0.0012072
pH1	cdsG	2.48219e-07	2.48219e-07
pH1	cdsAC	0.915726	0.915726
pH1	cdsAT	0.000116504	0.000116504
pH1	cdsAG	0.000658517	0.000658517
pH1	cdsCT	0.417416	0.417416
pH1	cdsCG	0.0112581	0.0112581
pH1	cdsTG	0.779204	0.779204
pH1	cdsAUel	5.86082e-27	5.86082e-27
pH1	ene	8.00403e-24	8.00403e-24
pH1	halflife	0.179046	0.179046
pH1	nostems	1.20913e-25	1.20913e-25
pH1	relstems	1.11381e-14	1.11381e-14
pH1	length.1	7.71222e-27	7.71222e-27
kDa1	G1	4.83753e-223	4.83753e-223
kDa1	A1	3.90751e-139	3.90751e-139
kDa1	L1	5.39616e-262	5.39616e-262
kDa1	M1	1.05695e-22	1.05695e-22
kDa1	F1	7.96496e-22	7.96496e-22
kDa1	W1	5.41357e-08	5.41357e-08
kDa1	K1	1.48956e-138	1.48956e-138
kDa1	Q1	1.28336e-11	1.28336e-11
kDa1	E1	4.80873e-25	4.80873e-25
kDa1	S1	1.96455e-12	1.96455e-12
kDa1	P1	4.40058e-08	4.40058e-08
kDa1	V1	1.9918e-153	1.9918e-153
kDa1	I1	8.47415e-196	8.47415e-196
kDa1	C1	6.63753e-11	6.63753e-11
kDa1	Y1	0.741696	0.741696
kDa1	H1	7.7014e-08	7.7014e-08
kDa1	R1	0	0
kDa1	N1	4.08796e-09	4.08796e-09
kDa1	D1	2.30801e-29	2.30801e-29
kDa1	T1	0	0
kDa1	ncont1	2.54225e-228	2.54225e-228
kDa1	scont1	2.29894e-12	2.29894e-12
kDa1	Number.of.introns1	0.000116584	0.000116584
kDa1	First.intron.length1	0.000128511	0.000128511
kDa1	First.intron.GC1	0.000150938	0.000150938
kDa1	mRNA.half.life.short1	2.43918e-101	2.43918e-101
kDa1	Ribosome.occupancy1	1.10401e-99	1.10401e-99
kDa1	Ribosome.density..rb.kb.1	3.79261e-161	3.79261e-161
kDa1	ORF.length..nt.1	0	0
kDa1	GO.0006350_TRANSCRIPTION1	0	0
kDa1	GO.0006412_PROTEIN_BIOSYNTHESIS1	1.94392e-54	1.94392e-54
kDa1	GO.0008150_BIOLOGICAL_PROCESS1	2.92632e-26	2.92632e-26
kDa1	cyto1	0.00528575	0.00528575
kDa1	mito1	0.0915307	0.0915307
kDa1	er1	3.45294e-276	3.45294e-276
kDa1	MOLECULAR.WEIGHT..in.Daltons.	0	0
kDa1	PI	4.74335e-62	4.74335e-62
kDa1	CAI..Codon.Adaptation.Index.	8.39723e-09	8.39723e-09
kDa1	PROTEIN.LENGTH	0	0
kDa1	CODON.BIAS	3.12671e-19	3.12671e-19
kDa1	ALA	0	0
kDa1	ARG	1.4303e-173	1.4303e-173
kDa1	ASN	0	0
kDa1	ASP	0	0
kDa1	CYS	1.03308e-306	1.03308e-306
kDa1	GLN	6.7511e-63	6.7511e-63
kDa1	GLU	1.91662e-209	1.91662e-209
kDa1	GLY	6.5664e-118	6.5664e-118
kDa1	HIS	0	0
kDa1	ILE	0	0
kDa1	LEU	0	0
kDa1	LYS	0	0
kDa1	MET	3.22113e-149	3.22113e-149
kDa1	PHE	0	0
kDa1	PRO	0	0
kDa1	SER	0	0
kDa1	THR	0	0
kDa1	TRP	1.26075e-72	1.26075e-72
kDa1	TYR	0	0
kDa1	VAL	0	0
kDa1	FOP.SCORE..Frequency.of.Optimal.Codons.	9.55497e-18	9.55497e-18
kDa1	GRAVY.SCORE..Hydropathicity.of.Protein.	0	0
kDa1	AROMATICITY.SCORE..Frequency.of.aromatic.amino.acids..Phe..Tyr..Trp.	7.22767e-25	7.22767e-25
kDa1	econt	3.88692e-190	3.88692e-190
kDa1	ccont	0	0
kDa1	hcont	0	0
kDa1	econtrel	2.63434e-07	2.63434e-07
kDa1	ccontrel	9.70867e-108	9.70867e-108
kDa1	hcontrel	6.05369e-241	6.05369e-241
kDa1	gene2	0.434132	0.434132
kDa1	tfcode2	0.371277	0.371277
kDa1	chromosome2	0.422397	0.422397
kDa1	strand2	0.642521	0.642521
kDa1	start2	0.550284	0.550284
kDa1	stop2	0.551858	0.551858
kDa1	protlength2	2.5817e-28	2.5817e-28
kDa1	pH2	0.00472109	0.00472109
kDa1	kDa2	3.17326e-28	3.17326e-28
kDa1	G2	0.134588	0.134588
kDa1	A2	0.746247	0.746247
kDa1	L2	0.0437732	0.0437732
kDa1	M2	0.0257072	0.0257072
kDa1	F2	0.00325608	0.00325608
kDa1	W2	0.0675691	0.0675691
kDa1	K2	0.0806089	0.0806089
kDa1	Q2	0.0152616	0.0152616
kDa1	E2	0.766395	0.766395
kDa1	S2	0.497906	0.497906
kDa1	P2	0.661334	0.661334
kDa1	V2	0.292786	0.292786
kDa1	I2	0.00164959	0.00164959
kDa1	C2	0.410779	0.410779
kDa1	Y2	0.0511185	0.0511185
kDa1	H2	0.167557	0.167557
kDa1	R2	0.000728568	0.000728568
kDa1	N2	0.512881	0.512881
kDa1	D2	0.00955037	0.00955037
kDa1	T2	0.465139	0.465139
kDa1	ncont2	3.3031e-05	3.3031e-05
kDa1	scont2	0.0386478	0.0386478
kDa1	Number.of.introns2	1.16367e-05	1.16367e-05
kDa1	First.intron.length2	7.0558e-06	7.0558e-06
kDa1	First.intron.GC2	2.5654e-05	2.5654e-05
kDa1	mRNA.half.life.short2	0.305398	0.305398
kDa1	Ribosome.occupancy2	2.7944e-06	2.7944e-06
kDa1	Ribosome.density..rb.kb.2	0.00168455	0.00168455
kDa1	ORF.length..nt.2	9.30147e-29	9.30147e-29
kDa1	GO.0006350_TRANSCRIPTION2	0.831083	0.831083
kDa1	GO.0006412_PROTEIN_BIOSYNTHESIS2	0.195145	0.195145
kDa1	GO.0007049_CELL_CYCLE2	0.947686	0.947686
kDa1	GO.0007165_SIGNAL_TRANSDUCTION2	0.945794	0.945794
kDa1	GO.0008150_BIOLOGICAL_PROCESS2	0.379735	0.379735
kDa1	nuc2	0.330521	0.330521
kDa1	vac2	0.0483439	0.0483439
kDa1	cyto2	0.889929	0.889929
kDa1	mito2	0.000252932	0.000252932
kDa1	relinstems	7.06246e-10	7.06246e-10
kDa1	length	2.9835e-29	2.9835e-29
kDa1	relnostems	0.449052	0.449052
kDa1	nstems	1.31016e-28	1.31016e-28
kDa1	cs3	0.727915	0.727915
kDa1	cs5	0.0485913	0.0485913
kDa1	csorf	0.0471607	0.0471607
kDa1	lu3	0.847228	0.847228
kDa1	u3A	0.480905	0.480905
kDa1	u3C	0.23879	0.23879
kDa1	u3T	0.661831	0.661831
kDa1	u3G	0.493601	0.493601
kDa1	u3AC	0.335298	0.335298
kDa1	u3AT	0.261717	0.261717
kDa1	u3AG	0.666288	0.666288
kDa1	u3CT	0.531407	0.531407
kDa1	u3CG	0.267048	0.267048
kDa1	u3TG	0.864362	0.864362
kDa1	X3AUel	0.857808	0.857808
kDa1	lu5	0.000538347	0.000538347
kDa1	u5A	0.124245	0.124245
kDa1	u5C	0.402544	0.402544
kDa1	u5T	0.000229305	0.000229305
kDa1	u5G	0.102072	0.102072
kDa1	u5AC	0.374986	0.374986
kDa1	u5AT	0.0763342	0.0763342
kDa1	u5AG	0.876202	0.876202
kDa1	u5CT	0.0844189	0.0844189
kDa1	u5CG	0.585437	0.585437
kDa1	u5TG	0.749177	0.749177
kDa1	X5AUel	0.000572662	0.000572662
kDa1	lcds	2.5817e-28	2.5817e-28
kDa1	cdsA	0.0304751	0.0304751
kDa1	cdsC	0.00487335	0.00487335
kDa1	cdsT	8.96614e-14	8.96614e-14
kDa1	cdsG	0.000487002	0.000487002
kDa1	cdsAC	0.000409659	0.000409659
kDa1	cdsAT	0.00108766	0.00108766
kDa1	cdsAG	8.28392e-08	8.28392e-08
kDa1	cdsCT	0.00108609	0.00108609
kDa1	cdsCG	0.000198749	0.000198749
kDa1	cdsTG	5.18579e-05	5.18579e-05
kDa1	cdsAUel	3.02362e-28	3.02362e-28
kDa1	ene	1.53127e-26	1.53127e-26
kDa1	halflife	0.00355695	0.00355695
kDa1	nostems	3.22174e-27	3.22174e-27
kDa1	relstems	2.01298e-16	2.01298e-16
kDa1	length.1	1.34072e-27	1.34072e-27
G1	A1	1.8627e-25	1.8627e-25
G1	L1	0	0
G1	M1	2.63506e-61	2.63506e-61
G1	F1	0	0
G1	W1	2.16704e-24	2.16704e-24
G1	K1	0	0
G1	Q1	2.97845e-15	2.97845e-15
G1	E1	0.286117	0.286117
G1	S1	0.404122	0.404122
G1	P1	1.52603e-157	1.52603e-157
G1	V1	4.32317e-263	4.32317e-263
G1	I1	0	0
G1	C1	4.49465e-05	4.49465e-05
G1	Y1	0	0
G1	H1	3.86319e-29	3.86319e-29
G1	R1	3.94586e-213	3.94586e-213
G1	N1	5.56046e-186	5.56046e-186
G1	D1	2.07932e-138	2.07932e-138
G1	T1	0	0
G1	ncont1	0.40549	0.40549
G1	scont1	2.64983e-52	2.64983e-52
G1	Number.of.introns1	2.66026e-08	2.66026e-08
G1	First.intron.length1	2.59908e-08	2.59908e-08
G1	First.intron.GC1	4.08663e-08	4.08663e-08
G1	mRNA.half.life.short1	1.4238e-180	1.4238e-180
G1	Ribosome.occupancy1	9.68403e-17	9.68403e-17
G1	Ribosome.density..rb.kb.1	0	0
G1	ORF.length..nt.1	3.51298e-224	3.51298e-224
G1	GO.0006350_TRANSCRIPTION1	9.71295e-149	9.71295e-149
G1	GO.0006412_PROTEIN_BIOSYNTHESIS1	1.45595e-109	1.45595e-109
G1	GO.0008150_BIOLOGICAL_PROCESS1	0.00116368	0.00116368
G1	cyto1	7.86879e-29	7.86879e-29
G1	mito1	0.241833	0.241833
G1	er1	2.30026e-82	2.30026e-82
G1	MOLECULAR.WEIGHT..in.Daltons.	4.83753e-223	4.83753e-223
G1	PI	8.57408e-295	8.57408e-295
G1	CAI..Codon.Adaptation.Index.	1.87333e-61	1.87333e-61
G1	PROTEIN.LENGTH	5.46703e-223	5.46703e-223
G1	CODON.BIAS	3.21899e-141	3.21899e-141
G1	ALA	1.33103e-48	1.33103e-48
G1	ARG	4.22272e-06	4.22272e-06
G1	ASN	5.03555e-166	5.03555e-166
G1	ASP	0	0
G1	CYS	4.0954e-22	4.0954e-22
G1	GLN	3.98566e-31	3.98566e-31
G1	GLU	3.62596e-28	3.62596e-28
G1	GLY	1.25078e-125	1.25078e-125
G1	HIS	8.74838e-21	8.74838e-21
G1	ILE	0	0
G1	LEU	0	0
G1	LYS	0	0
G1	MET	3.32397e-11	3.32397e-11
G1	PHE	8.25064e-05	8.25064e-05
G1	PRO	0.245841	0.245841
G1	SER	1.3258e-34	1.3258e-34
G1	THR	1.44217e-257	1.44217e-257
G1	TRP	3.08194e-05	3.08194e-05
G1	TYR	6.60585e-06	6.60585e-06
G1	VAL	5.55614e-232	5.55614e-232
G1	FOP.SCORE..Frequency.of.Optimal.Codons.	1.96498e-136	1.96498e-136
G1	GRAVY.SCORE..Hydropathicity.of.Protein.	1.10107e-127	1.10107e-127
G1	AROMATICITY.SCORE..Frequency.of.aromatic.amino.acids..Phe..Tyr..Trp.	0	0
G1	econt	1.98795e-67	1.98795e-67
G1	ccont	3.6886e-05	3.6886e-05
G1	hcont	0	0
G1	econtrel	5.9036e-275	5.9036e-275
G1	ccontrel	1.42258e-283	1.42258e-283
G1	hcontrel	0	0
G1	gene2	0.213633	0.213633
G1	tfcode2	0.558088	0.558088
G1	chromosome2	0.231728	0.231728
G1	strand2	0.0777665	0.0777665
G1	start2	0.701536	0.701536
G1	stop2	0.695615	0.695615
G1	protlength2	9.33133e-160	9.33133e-160
G1	pH2	2.70713e-14	2.70713e-14
G1	kDa2	6.59185e-159	6.59185e-159
G1	G2	0.398356	0.398356
G1	A2	0.61327	0.61327
G1	L2	0.070881	0.070881
G1	M2	0.218023	0.218023
G1	F2	5.04363e-05	5.04363e-05
G1	W2	0.024302	0.024302
G1	K2	2.57956e-07	2.57956e-07
G1	Q2	0.0416376	0.0416376
G1	E2	0.822964	0.822964
G1	S2	2.31487e-08	2.31487e-08
G1	P2	0.00532367	0.00532367
G1	V2	0.0174195	0.0174195
G1	I2	0.000425169	0.000425169
G1	C2	0.197267	0.197267
G1	Y2	4.05109e-05	4.05109e-05
G1	H2	0.454767	0.454767
G1	R2	3.68957e-17	3.68957e-17
G1	N2	5.03699e-08	5.03699e-08
G1	D2	2.82535e-09	2.82535e-09
G1	T2	0.00369754	0.00369754
G1	ncont2	2.8612e-14	2.8612e-14
G1	scont2	0.0353282	0.0353282
G1	Number.of.introns2	2.53591e-21	2.53591e-21
G1	First.intron.length2	2.1354e-21	2.1354e-21
G1	First.intron.GC2	6.36411e-21	6.36411e-21
G1	mRNA.half.life.short2	0.143891	0.143891
G1	Ribosome.occupancy2	5.05097e-31	5.05097e-31
G1	Ribosome.density..rb.kb.2	1.26041e-22	1.26041e-22
G1	ORF.length..nt.2	3.95383e-159	3.95383e-159
G1	GO.0006350_TRANSCRIPTION2	0.371744	0.371744
G1	GO.0006412_PROTEIN_BIOSYNTHESIS2	8.87322e-10	8.87322e-10
G1	GO.0007049_CELL_CYCLE2	0.311083	0.311083
G1	GO.0007165_SIGNAL_TRANSDUCTION2	0.0677394	0.0677394
G1	GO.0008150_BIOLOGICAL_PROCESS2	0.0103705	0.0103705
G1	nuc2	0.210126	0.210126
G1	vac2	0.000214904	0.000214904
G1	cyto2	0.861347	0.861347
G1	mito2	1.18877e-09	1.18877e-09
G1	relinstems	5.50945e-10	5.50945e-10
G1	length	7.19383e-157	7.19383e-157
G1	relnostems	0.00727571	0.00727571
G1	nstems	3.53967e-152	3.53967e-152
G1	cs3	0.521619	0.521619
G1	cs5	5.04041e-05	5.04041e-05
G1	csorf	1.59033e-08	1.59033e-08
G1	lu3	0.0546069	0.0546069
G1	u3A	0.357216	0.357216
G1	u3C	0.897891	0.897891
G1	u3T	0.791495	0.791495
G1	u3G	0.0524612	0.0524612
G1	u3AC	0.24036	0.24036
G1	u3AT	0.0217828	0.0217828
G1	u3AG	0.493144	0.493144
G1	u3CT	0.628188	0.628188
G1	u3CG	0.1039	0.1039
G1	u3TG	0.633339	0.633339
G1	X3AUel	0.0609286	0.0609286
G1	lu5	3.21171e-16	3.21171e-16
G1	u5A	4.38805e-09	4.38805e-09
G1	u5C	0.410378	0.410378
G1	u5T	1.01509e-17	1.01509e-17
G1	u5G	0.12198	0.12198
G1	u5AC	0.0724005	0.0724005
G1	u5AT	0.000149202	0.000149202
G1	u5AG	0.141466	0.141466
G1	u5CT	4.80543e-05	4.80543e-05
G1	u5CG	0.764833	0.764833
G1	u5TG	0.00126806	0.00126806
G1	X5AUel	3.67598e-16	3.67598e-16
G1	lcds	9.33133e-160	9.33133e-160
G1	cdsA	0.189482	0.189482
G1	cdsC	0.00561471	0.00561471
G1	cdsT	6.6228e-32	6.6228e-32
G1	cdsG	3.92418e-24	3.92418e-24
G1	cdsAC	0.0207684	0.0207684
G1	cdsAT	1.26545e-17	1.26545e-17
G1	cdsAG	5.6506e-30	5.6506e-30
G1	cdsCT	1.88103e-07	1.88103e-07
G1	cdsCG	7.21782e-09	7.21782e-09
G1	cdsTG	0.000882601	0.000882601
G1	cdsAUel	1.66121e-159	1.66121e-159
G1	ene	1.0627e-149	1.0627e-149
G1	halflife	0.0496573	0.0496573
G1	nostems	2.25631e-155	2.25631e-155
G1	relstems	4.48849e-81	4.48849e-81
G1	length.1	2.84353e-160	2.84353e-160
A1	L1	1.39402e-07	1.39402e-07
A1	M1	1.50887e-153	1.50887e-153
A1	F1	2.08604e-99	2.08604e-99
A1	W1	0.000252392	0.000252392
A1	K1	1.18916e-14	1.18916e-14
A1	Q1	1.86418e-16	1.86418e-16
A1	E1	1.24953e-41	1.24953e-41
A1	S1	1.40947e-05	1.40947e-05
A1	P1	5.75376e-07	5.75376e-07
A1	V1	1.49084e-64	1.49084e-64
A1	I1	1.19538e-06	1.19538e-06
A1	C1	1.27743e-40	1.27743e-40
A1	Y1	2.40832e-22	2.40832e-22
A1	H1	0.0315623	0.0315623
A1	R1	3.09049e-178	3.09049e-178
A1	N1	8.64499e-19	8.64499e-19
A1	D1	1.05e-124	1.05e-124
A1	T1	0.00413911	0.00413911
A1	ncont1	0	0
A1	scont1	8.53041e-91	8.53041e-91
A1	Number.of.introns1	8.96849e-20	8.96849e-20
A1	First.intron.length1	7.64172e-20	7.64172e-20
A1	First.intron.GC1	6.06815e-20	6.06815e-20
A1	mRNA.half.life.short1	9.43008e-230	9.43008e-230
A1	Ribosome.occupancy1	8.37756e-28	8.37756e-28
A1	Ribosome.density..rb.kb.1	2.56509e-42	2.56509e-42
A1	ORF.length..nt.1	4.99528e-144	4.99528e-144
A1	GO.0006350_TRANSCRIPTION1	4.13879e-14	4.13879e-14
A1	GO.0006412_PROTEIN_BIOSYNTHESIS1	0	0
A1	GO.0008150_BIOLOGICAL_PROCESS1	0.00262051	0.00262051
A1	cyto1	1.00857e-189	1.00857e-189
A1	mito1	0.315667	0.315667
A1	er1	5.64462e-115	5.64462e-115
A1	MOLECULAR.WEIGHT..in.Daltons.	3.90751e-139	3.90751e-139
A1	PI	2.9134e-18	2.9134e-18
A1	CAI..Codon.Adaptation.Index.	1.02786e-53	1.02786e-53
A1	PROTEIN.LENGTH	3.3047e-142	3.3047e-142
A1	CODON.BIAS	3.20056e-55	3.20056e-55
A1	ALA	0	0
A1	ARG	0.316146	0.316146
A1	ASN	5.07055e-72	5.07055e-72
A1	ASP	0.00546243	0.00546243
A1	CYS	8.03484e-65	8.03484e-65
A1	GLN	2.61422e-10	2.61422e-10
A1	GLU	5.105e-49	5.105e-49
A1	GLY	2.40505e-48	2.40505e-48
A1	HIS	7.69725e-51	7.69725e-51
A1	ILE	4.48107e-46	4.48107e-46
A1	LEU	1.37139e-12	1.37139e-12
A1	LYS	8.54064e-49	8.54064e-49
A1	MET	8.79054e-173	8.79054e-173
A1	PHE	1.24432e-238	1.24432e-238
A1	PRO	7.72926e-27	7.72926e-27
A1	SER	1.23438e-142	1.23438e-142
A1	THR	1.30382e-87	1.30382e-87
A1	TRP	5.84056e-23	5.84056e-23
A1	TYR	1.10978e-147	1.10978e-147
A1	VAL	1.6084e-144	1.6084e-144
A1	FOP.SCORE..Frequency.of.Optimal.Codons.	6.88719e-57	6.88719e-57
A1	GRAVY.SCORE..Hydropathicity.of.Protein.	4.27765e-305	4.27765e-305
A1	AROMATICITY.SCORE..Frequency.of.aromatic.amino.acids..Phe..Tyr..Trp.	1.74683e-21	1.74683e-21
A1	econt	0	0
A1	ccont	1.20628e-115	1.20628e-115
A1	hcont	2.34167e-18	2.34167e-18
A1	econtrel	0	0
A1	ccontrel	9.05603e-59	9.05603e-59
A1	hcontrel	0.0949309	0.0949309
A1	gene2	0.0305094	0.0305094
A1	tfcode2	0.918051	0.918051
A1	chromosome2	0.0307933	0.0307933
A1	strand2	0.509051	0.509051
A1	start2	0.354049	0.354049
A1	stop2	0.356965	0.356965
A1	protlength2	0.22107	0.22107
A1	pH2	0.369906	0.369906
A1	kDa2	0.191356	0.191356
A1	G2	0.513031	0.513031
A1	A2	0.1028	0.1028
A1	L2	0.579708	0.579708
A1	M2	0.0391005	0.0391005
A1	F2	0.0741511	0.0741511
A1	W2	0.661156	0.661156
A1	K2	0.00355834	0.00355834
A1	Q2	0.905592	0.905592
A1	E2	0.000388128	0.000388128
A1	S2	0.118936	0.118936
A1	P2	0.243243	0.243243
A1	V2	0.110517	0.110517
A1	I2	0.935728	0.935728
A1	C2	0.0606374	0.0606374
A1	Y2	0.681103	0.681103
A1	H2	0.532478	0.532478
A1	R2	0.21004	0.21004
A1	N2	0.450644	0.450644
A1	D2	0.00151979	0.00151979
A1	T2	0.230616	0.230616
A1	ncont2	0.141451	0.141451
A1	scont2	0.00808244	0.00808244
A1	Number.of.introns2	0.535219	0.535219
A1	First.intron.length2	0.468285	0.468285
A1	First.intron.GC2	0.62104	0.62104
A1	mRNA.half.life.short2	0.0419695	0.0419695
A1	Ribosome.occupancy2	0.05109	0.05109
A1	Ribosome.density..rb.kb.2	0.323295	0.323295
A1	ORF.length..nt.2	0.245364	0.245364
A1	GO.0006350_TRANSCRIPTION2	0.115799	0.115799
A1	GO.0006412_PROTEIN_BIOSYNTHESIS2	0.409391	0.409391
A1	GO.0007049_CELL_CYCLE2	0.231572	0.231572
A1	GO.0007165_SIGNAL_TRANSDUCTION2	0.227253	0.227253
A1	GO.0008150_BIOLOGICAL_PROCESS2	0.152392	0.152392
A1	nuc2	0.0143299	0.0143299
A1	vac2	0.79629	0.79629
A1	cyto2	0.55492	0.55492
A1	mito2	0.717034	0.717034
A1	relinstems	0.555112	0.555112
A1	length	0.266083	0.266083
A1	relnostems	0.35049	0.35049
A1	nstems	0.243254	0.243254
A1	cs3	0.602285	0.602285
A1	cs5	0.185206	0.185206
A1	csorf	0.8553	0.8553
A1	lu3	0.228732	0.228732
A1	u3A	0.954685	0.954685
A1	u3C	0.415622	0.415622
A1	u3T	0.452437	0.452437
A1	u3G	0.00581188	0.00581188
A1	u3AC	0.524849	0.524849
A1	u3AT	0.401777	0.401777
A1	u3AG	0.05571	0.05571
A1	u3CT	0.292034	0.292034
A1	u3CG	0.826241	0.826241
A1	u3TG	0.0169398	0.0169398
A1	X3AUel	0.218197	0.218197
A1	lu5	0.26688	0.26688
A1	u5A	0.997391	0.997391
A1	u5C	0.280243	0.280243
A1	u5T	0.872631	0.872631
A1	u5G	0.135399	0.135399
A1	u5AC	0.519159	0.519159
A1	u5AT	0.551946	0.551946
A1	u5AG	0.697241	0.697241
A1	u5CT	0.73903	0.73903
A1	u5CG	0.267451	0.267451
A1	u5TG	0.789815	0.789815
A1	X5AUel	0.269736	0.269736
A1	lcds	0.22107	0.22107
A1	cdsA	4.67213e-05	4.67213e-05
A1	cdsC	9.11565e-06	9.11565e-06
A1	cdsT	0.0521977	0.0521977
A1	cdsG	0.0331333	0.0331333
A1	cdsAC	0.200077	0.200077
A1	cdsAT	0.0556509	0.0556509
A1	cdsAG	0.000677917	0.000677917
A1	cdsCT	1.48602e-07	1.48602e-07
A1	cdsCG	0.499974	0.499974
A1	cdsTG	0.557711	0.557711
A1	cdsAUel	0.228338	0.228338
A1	ene	0.200305	0.200305
A1	halflife	0.0370193	0.0370193
A1	nostems	0.168318	0.168318
A1	relstems	0.759355	0.759355
A1	length.1	0.197736	0.197736
L1	M1	4.70252e-63	4.70252e-63
L1	F1	2.84792e-255	2.84792e-255
L1	W1	2.788e-92	2.788e-92
L1	K1	0	0
L1	Q1	0.0244621	0.0244621
L1	E1	0.0105266	0.0105266
L1	S1	2.01419e-06	2.01419e-06
L1	P1	1.18056e-161	1.18056e-161
L1	V1	2.05194e-103	2.05194e-103
L1	I1	0	0
L1	C1	0.0823618	0.0823618
L1	Y1	2.95727e-57	2.95727e-57
L1	H1	6.28148e-35	6.28148e-35
L1	R1	7.74603e-80	7.74603e-80
L1	N1	9.11947e-16	9.11947e-16
L1	D1	2.65001e-62	2.65001e-62
L1	T1	0	0
L1	ncont1	0.0391082	0.0391082
L1	scont1	5.14577e-39	5.14577e-39
L1	Number.of.introns1	0.000534376	0.000534376
L1	First.intron.length1	0.00058213	0.00058213
L1	First.intron.GC1	0.000694103	0.000694103
L1	mRNA.half.life.short1	1.22307e-118	1.22307e-118
L1	Ribosome.occupancy1	0.183231	0.183231
L1	Ribosome.density..rb.kb.1	1.73679e-231	1.73679e-231
L1	ORF.length..nt.1	1.13828e-254	1.13828e-254
L1	GO.0006350_TRANSCRIPTION1	2.14739e-89	2.14739e-89
L1	GO.0006412_PROTEIN_BIOSYNTHESIS1	0.505622	0.505622
L1	GO.0008150_BIOLOGICAL_PROCESS1	0.000261487	0.000261487
L1	cyto1	5.53939e-31	5.53939e-31
L1	mito1	0.433026	0.433026
L1	er1	1.1009e-177	1.1009e-177
L1	MOLECULAR.WEIGHT..in.Daltons.	5.39616e-262	5.39616e-262
L1	PI	0	0
L1	CAI..Codon.Adaptation.Index.	8.17002e-11	8.17002e-11
L1	PROTEIN.LENGTH	4.36646e-255	4.36646e-255
L1	CODON.BIAS	1.35644e-43	1.35644e-43
L1	ALA	2.55041e-64	2.55041e-64
L1	ARG	0.378665	0.378665
L1	ASN	1.22438e-40	1.22438e-40
L1	ASP	0	0
L1	CYS	2.74638e-55	2.74638e-55
L1	GLN	9.2526e-08	9.2526e-08
L1	GLU	8.37631e-23	8.37631e-23
L1	GLY	2.24413e-103	2.24413e-103
L1	HIS	5.78813e-24	5.78813e-24
L1	ILE	0	0
L1	LEU	0	0
L1	LYS	0	0
L1	MET	7.50497e-31	7.50497e-31
L1	PHE	0.000127452	0.000127452
L1	PRO	0.62225	0.62225
L1	SER	1.98553e-17	1.98553e-17
L1	THR	9.58543e-263	9.58543e-263
L1	TRP	0.000937278	0.000937278
L1	TYR	4.1345e-26	4.1345e-26
L1	VAL	1.92e-252	1.92e-252
L1	FOP.SCORE..Frequency.of.Optimal.Codons.	4.2304e-43	4.2304e-43
L1	GRAVY.SCORE..Hydropathicity.of.Protein.	9.49579e-178	9.49579e-178
L1	AROMATICITY.SCORE..Frequency.of.aromatic.amino.acids..Phe..Tyr..Trp.	5.61055e-237	5.61055e-237
L1	econt	2.05963e-56	2.05963e-56
L1	ccont	1.31709e-05	1.31709e-05
L1	hcont	0	0
L1	econtrel	3.92072e-178	3.92072e-178
L1	ccontrel	0	0
L1	hcontrel	0	0
L1	gene2	0.939913	0.939913
L1	tfcode2	0.886168	0.886168
L1	chromosome2	0.895516	0.895516
L1	strand2	0.120326	0.120326
L1	start2	0.865501	0.865501
L1	stop2	0.860623	0.860623
L1	protlength2	1.49627e-75	1.49627e-75
L1	pH2	1.60517e-08	1.60517e-08
L1	kDa2	1.8192e-75	1.8192e-75
L1	G2	0.22934	0.22934
L1	A2	0.382488	0.382488
L1	L2	0.482248	0.482248
L1	M2	0.190796	0.190796
L1	F2	0.0294342	0.0294342
L1	W2	0.215765	0.215765
L1	K2	0.163096	0.163096
L1	Q2	0.17147	0.17147
L1	E2	0.0608911	0.0608911
L1	S2	0.00111283	0.00111283
L1	P2	0.238182	0.238182
L1	V2	0.0689937	0.0689937
L1	I2	0.0113373	0.0113373
L1	C2	0.709575	0.709575
L1	Y2	0.0329021	0.0329021
L1	H2	0.384579	0.384579
L1	R2	3.98665e-08	3.98665e-08
L1	N2	1.76531e-05	1.76531e-05
L1	D2	4.14269e-09	4.14269e-09
L1	T2	0.0507828	0.0507828
L1	ncont2	4.35191e-06	4.35191e-06
L1	scont2	0.0379851	0.0379851
L1	Number.of.introns2	2.08511e-05	2.08511e-05
L1	First.intron.length2	2.10878e-05	2.10878e-05
L1	First.intron.GC2	2.47711e-05	2.47711e-05
L1	mRNA.half.life.short2	0.304102	0.304102
L1	Ribosome.occupancy2	7.68749e-18	7.68749e-18
L1	Ribosome.density..rb.kb.2	2.46293e-12	2.46293e-12
L1	ORF.length..nt.2	2.06719e-76	2.06719e-76
L1	GO.0006350_TRANSCRIPTION2	0.295236	0.295236
L1	GO.0006412_PROTEIN_BIOSYNTHESIS2	0.000553695	0.000553695
L1	GO.0007049_CELL_CYCLE2	0.55882	0.55882
L1	GO.0007165_SIGNAL_TRANSDUCTION2	0.462858	0.462858
L1	GO.0008150_BIOLOGICAL_PROCESS2	0.0903231	0.0903231
L1	nuc2	0.680798	0.680798
L1	vac2	0.0155198	0.0155198
L1	cyto2	0.620642	0.620642
L1	mito2	4.45613e-06	4.45613e-06
L1	relinstems	5.26531e-05	5.26531e-05
L1	length	3.25701e-74	3.25701e-74
L1	relnostems	0.071282	0.071282
L1	nstems	2.38549e-72	2.38549e-72
L1	cs3	0.454889	0.454889
L1	cs5	0.0179491	0.0179491
L1	csorf	1.0595e-05	1.0595e-05
L1	lu3	0.806386	0.806386
L1	u3A	0.000104589	0.000104589
L1	u3C	0.541644	0.541644
L1	u3T	0.00618853	0.00618853
L1	u3G	0.345407	0.345407
L1	u3AC	0.183847	0.183847
L1	u3AT	0.795026	0.795026
L1	u3AG	0.472974	0.472974
L1	u3CT	0.405348	0.405348
L1	u3CG	0.224033	0.224033
L1	u3TG	0.190191	0.190191
L1	X3AUel	0.867106	0.867106
L1	lu5	5.20973e-06	5.20973e-06
L1	u5A	0.00291306	0.00291306
L1	u5C	0.10545	0.10545
L1	u5T	8.82513e-08	8.82513e-08
L1	u5G	0.134706	0.134706
L1	u5AC	0.200893	0.200893
L1	u5AT	0.0039806	0.0039806
L1	u5AG	0.278068	0.278068
L1	u5CT	0.0530906	0.0530906
L1	u5CG	0.587231	0.587231
L1	u5TG	0.0408148	0.0408148
L1	X5AUel	5.44997e-06	5.44997e-06
L1	lcds	1.49627e-75	1.49627e-75
L1	cdsA	0.0926378	0.0926378
L1	cdsC	0.000527048	0.000527048
L1	cdsT	3.60304e-12	3.60304e-12
L1	cdsG	7.43916e-13	7.43916e-13
L1	cdsAC	0.140982	0.140982
L1	cdsAT	5.08945e-10	5.08945e-10
L1	cdsAG	2.88274e-10	2.88274e-10
L1	cdsCT	0.0641367	0.0641367
L1	cdsCG	1.03424e-05	1.03424e-05
L1	cdsTG	0.228716	0.228716
L1	cdsAUel	1.97032e-75	1.97032e-75
L1	ene	5.50155e-68	5.50155e-68
L1	halflife	0.0380049	0.0380049
L1	nostems	4.71275e-71	4.71275e-71
L1	relstems	2.90358e-36	2.90358e-36
L1	length.1	4.84716e-73	4.84716e-73
M1	F1	1.18727e-205	1.18727e-205
M1	W1	6.41192e-179	6.41192e-179
M1	K1	1.10556e-222	1.10556e-222
M1	Q1	6.66984e-197	6.66984e-197
M1	E1	0	0
M1	S1	5.26249e-08	5.26249e-08
M1	P1	2.00814e-210	2.00814e-210
M1	V1	3.78962e-18	3.78962e-18
M1	I1	2.54587e-50	2.54587e-50
M1	C1	0	0
M1	Y1	8.74655e-148	8.74655e-148
M1	H1	2.04373e-106	2.04373e-106
M1	R1	4.61216e-166	4.61216e-166
M1	N1	5.3172e-117	5.3172e-117
M1	D1	1.42227e-16	1.42227e-16
M1	T1	5.89211e-75	5.89211e-75
M1	ncont1	5.17722e-08	5.17722e-08
M1	scont1	0	0
M1	Number.of.introns1	0.260707	0.260707
M1	First.intron.length1	0.256461	0.256461
M1	First.intron.GC1	0.278261	0.278261
M1	mRNA.half.life.short1	2.22874e-212	2.22874e-212
M1	Ribosome.occupancy1	0.736779	0.736779
M1	Ribosome.density..rb.kb.1	4.02672e-30	4.02672e-30
M1	ORF.length..nt.1	7.97948e-24	7.97948e-24
M1	GO.0006350_TRANSCRIPTION1	0.917877	0.917877
M1	GO.0006412_PROTEIN_BIOSYNTHESIS1	1.97736e-96	1.97736e-96
M1	GO.0008150_BIOLOGICAL_PROCESS1	0.00584953	0.00584953
M1	cyto1	0	0
M1	mito1	0.676355	0.676355
M1	er1	1.12198e-41	1.12198e-41
M1	MOLECULAR.WEIGHT..in.Daltons.	1.05695e-22	1.05695e-22
M1	PI	9.16706e-121	9.16706e-121
M1	CAI..Codon.Adaptation.Index.	5.51793e-60	5.51793e-60
M1	PROTEIN.LENGTH	6.40048e-23	6.40048e-23
M1	CODON.BIAS	7.66001e-57	7.66001e-57
M1	ALA	9.11513e-77	9.11513e-77
M1	ARG	2.00411e-94	2.00411e-94
M1	ASN	2.47131e-178	2.47131e-178
M1	ASP	9.67581e-30	9.67581e-30
M1	CYS	1.97324e-153	1.97324e-153
M1	GLN	0	0
M1	GLU	1.01172e-134	1.01172e-134
M1	GLY	0.000428049	0.000428049
M1	HIS	8.46454e-18	8.46454e-18
M1	ILE	3.74499e-21	3.74499e-21
M1	LEU	3.90331e-30	3.90331e-30
M1	LYS	1.80353e-90	1.80353e-90
M1	MET	0	0
M1	PHE	1.04868e-130	1.04868e-130
M1	PRO	4.5092e-25	4.5092e-25
M1	SER	1.03538e-08	1.03538e-08
M1	THR	0.606832	0.606832
M1	TRP	2.37958e-149	2.37958e-149
M1	TYR	2.12534e-52	2.12534e-52
M1	VAL	6.2345e-11	6.2345e-11
M1	FOP.SCORE..Frequency.of.Optimal.Codons.	1.00683e-56	1.00683e-56
M1	GRAVY.SCORE..Hydropathicity.of.Protein.	3.95093e-20	3.95093e-20
M1	AROMATICITY.SCORE..Frequency.of.aromatic.amino.acids..Phe..Tyr..Trp.	8.44562e-222	8.44562e-222
M1	econt	1.07057e-99	1.07057e-99
M1	ccont	2.64498e-60	2.64498e-60
M1	hcont	5.55516e-63	5.55516e-63
M1	econtrel	0	0
M1	ccontrel	2.97928e-49	2.97928e-49
M1	hcontrel	4.14994e-117	4.14994e-117
M1	gene2	0.00380503	0.00380503
M1	tfcode2	0.636087	0.636087
M1	chromosome2	0.00415098	0.00415098
M1	strand2	0.447302	0.447302
M1	start2	0.328447	0.328447
M1	stop2	0.326266	0.326266
M1	protlength2	3.81668e-27	3.81668e-27
M1	pH2	2.81255e-07	2.81255e-07
M1	kDa2	3.767e-27	3.767e-27
M1	G2	0.0425946	0.0425946
M1	A2	0.531677	0.531677
M1	L2	0.279708	0.279708
M1	M2	0.0520513	0.0520513
M1	F2	0.0637785	0.0637785
M1	W2	0.820637	0.820637
M1	K2	0.144552	0.144552
M1	Q2	0.0855665	0.0855665
M1	E2	0.00199098	0.00199098
M1	S2	0.0390148	0.0390148
M1	P2	0.576345	0.576345
M1	V2	0.016157	0.016157
M1	I2	0.590307	0.590307
M1	C2	0.237608	0.237608
M1	Y2	0.675411	0.675411
M1	H2	0.777239	0.777239
M1	R2	0.072981	0.072981
M1	N2	4.41573e-06	4.41573e-06
M1	D2	3.44229e-06	3.44229e-06
M1	T2	0.0157334	0.0157334
M1	ncont2	0.56043	0.56043
M1	scont2	0.736532	0.736532
M1	Number.of.introns2	4.51963e-05	4.51963e-05
M1	First.intron.length2	7.38481e-05	7.38481e-05
M1	First.intron.GC2	4.16753e-05	4.16753e-05
M1	mRNA.half.life.short2	0.304244	0.304244
M1	Ribosome.occupancy2	0.00108792	0.00108792
M1	Ribosome.density..rb.kb.2	4.99706e-06	4.99706e-06
M1	ORF.length..nt.2	1.58161e-26	1.58161e-26
M1	GO.0006350_TRANSCRIPTION2	0.960619	0.960619
M1	GO.0006412_PROTEIN_BIOSYNTHESIS2	0.0359385	0.0359385
M1	GO.0007049_CELL_CYCLE2	0.923039	0.923039
M1	GO.0007165_SIGNAL_TRANSDUCTION2	0.166547	0.166547
M1	GO.0008150_BIOLOGICAL_PROCESS2	0.192998	0.192998
M1	nuc2	0.790914	0.790914
M1	vac2	0.278251	0.278251
M1	cyto2	0.143779	0.143779
M1	mito2	0.162878	0.162878
M1	relinstems	0.578267	0.578267
M1	length	3.98089e-24	3.98089e-24
M1	relnostems	0.423006	0.423006
M1	nstems	8.87067e-24	8.87067e-24
M1	cs3	0.911159	0.911159
M1	cs5	0.793436	0.793436
M1	csorf	0.0123536	0.0123536
M1	lu3	0.473337	0.473337
M1	u3A	0.000252961	0.000252961
M1	u3C	0.657183	0.657183
M1	u3T	0.000266455	0.000266455
M1	u3G	0.766669	0.766669
M1	u3AC	0.0242846	0.0242846
M1	u3AT	0.152502	0.152502
M1	u3AG	0.419403	0.419403
M1	u3CT	0.0072695	0.0072695
M1	u3CG	0.581689	0.581689
M1	u3TG	0.99506	0.99506
M1	X3AUel	0.51227	0.51227
M1	lu5	0.355453	0.355453
M1	u5A	0.0207648	0.0207648
M1	u5C	0.906502	0.906502
M1	u5T	0.0227107	0.0227107
M1	u5G	0.415191	0.415191
M1	u5AC	0.416747	0.416747
M1	u5AT	0.172223	0.172223
M1	u5AG	0.182356	0.182356
M1	u5CT	0.526776	0.526776
M1	u5CG	0.0738581	0.0738581
M1	u5TG	0.0216002	0.0216002
M1	X5AUel	0.346653	0.346653
M1	lcds	3.81668e-27	3.81668e-27
M1	cdsA	0.00026136	0.00026136
M1	cdsC	0.314386	0.314386
M1	cdsT	0.767808	0.767808
M1	cdsG	0.00328312	0.00328312
M1	cdsAC	0.00649335	0.00649335
M1	cdsAT	0.00149819	0.00149819
M1	cdsAG	0.0565522	0.0565522
M1	cdsCT	0.0583866	0.0583866
M1	cdsCG	0.503902	0.503902
M1	cdsTG	0.162631	0.162631
M1	cdsAUel	4.05787e-27	4.05787e-27
M1	ene	2.26953e-24	2.26953e-24
M1	halflife	0.847054	0.847054
M1	nostems	9.97509e-26	9.97509e-26
M1	relstems	1.04489e-11	1.04489e-11
M1	length.1	9.73944e-26	9.73944e-26
F1	W1	0.0866975	0.0866975
F1	K1	1.4455e-267	1.4455e-267
F1	Q1	0.0128385	0.0128385
F1	E1	1.2878e-81	1.2878e-81
F1	S1	1.87196e-21	1.87196e-21
F1	P1	2.17082e-93	2.17082e-93
F1	V1	2.36761e-84	2.36761e-84
F1	I1	1.62545e-267	1.62545e-267
F1	C1	2.18595e-122	2.18595e-122
F1	Y1	0	0
F1	H1	1.49879e-29	1.49879e-29
F1	R1	6.8792e-17	6.8792e-17
F1	N1	6.72491e-24	6.72491e-24
F1	D1	3.55243e-255	3.55243e-255
F1	T1	1.61119e-176	1.61119e-176
F1	ncont1	4.87387e-05	4.87387e-05
F1	scont1	7.18633e-239	7.18633e-239
F1	Number.of.introns1	8.14166e-10	8.14166e-10
F1	First.intron.length1	1.00888e-09	1.00888e-09
F1	First.intron.GC1	1.33544e-09	1.33544e-09
F1	mRNA.half.life.short1	6.65497e-172	6.65497e-172
F1	Ribosome.occupancy1	0.00200799	0.00200799
F1	Ribosome.density..rb.kb.1	0	0
F1	ORF.length..nt.1	8.00747e-23	8.00747e-23
F1	GO.0006350_TRANSCRIPTION1	9.20698e-154	9.20698e-154
F1	GO.0006412_PROTEIN_BIOSYNTHESIS1	8.29748e-238	8.29748e-238
F1	GO.0008150_BIOLOGICAL_PROCESS1	9.44967e-74	9.44967e-74
F1	cyto1	6.35553e-287	6.35553e-287
F1	mito1	0.655528	0.655528
F1	er1	1.79591e-27	1.79591e-27
F1	MOLECULAR.WEIGHT..in.Daltons.	7.96496e-22	7.96496e-22
F1	PI	7.79928e-112	7.79928e-112
F1	CAI..Codon.Adaptation.Index.	4.93869e-11	4.93869e-11
F1	PROTEIN.LENGTH	4.73235e-23	4.73235e-23
F1	CODON.BIAS	1.43919e-21	1.43919e-21
F1	ALA	0.160507	0.160507
F1	ARG	3.47123e-05	3.47123e-05
F1	ASN	3.67117e-10	3.67117e-10
F1	ASP	6.39031e-209	6.39031e-209
F1	CYS	2.82062e-23	2.82062e-23
F1	GLN	0.990102	0.990102
F1	GLU	3.95163e-44	3.95163e-44
F1	GLY	1.78277e-59	1.78277e-59
F1	HIS	0.0374692	0.0374692
F1	ILE	8.14612e-199	8.14612e-199
F1	LEU	1.45557e-256	1.45557e-256
F1	LYS	2.16843e-217	2.16843e-217
F1	MET	1.6341e-110	1.6341e-110
F1	PHE	2.91946e-155	2.91946e-155
F1	PRO	0.310707	0.310707
F1	SER	4.36636e-18	4.36636e-18
F1	THR	1.04812e-79	1.04812e-79
F1	TRP	4.74911e-14	4.74911e-14
F1	TYR	1.02695e-24	1.02695e-24
F1	VAL	3.61812e-20	3.61812e-20
F1	FOP.SCORE..Frequency.of.Optimal.Codons.	8.98266e-22	8.98266e-22
F1	GRAVY.SCORE..Hydropathicity.of.Protein.	0.851393	0.851393
F1	AROMATICITY.SCORE..Frequency.of.aromatic.amino.acids..Phe..Tyr..Trp.	0	0
F1	econt	4.56972e-103	4.56972e-103
F1	ccont	1.83974e-06	1.83974e-06
F1	hcont	0	0
F1	econtrel	0	0
F1	ccontrel	7.24923e-104	7.24923e-104
F1	hcontrel	0	0
F1	gene2	0.0808	0.0808
F1	tfcode2	0.887606	0.887606
F1	chromosome2	0.0733416	0.0733416
F1	strand2	0.224364	0.224364
F1	start2	0.290038	0.290038
F1	stop2	0.293579	0.293579
F1	protlength2	3.61456e-73	3.61456e-73
F1	pH2	3.26398e-08	3.26398e-08
F1	kDa2	5.77876e-74	5.77876e-74
F1	G2	0.0231927	0.0231927
F1	A2	0.0281818	0.0281818
F1	L2	0.043343	0.043343
F1	M2	0.359911	0.359911
F1	F2	0.14015	0.14015
F1	W2	0.0450488	0.0450488
F1	K2	0.093908	0.093908
F1	Q2	0.678751	0.678751
F1	E2	0.00153699	0.00153699
F1	S2	0.00645152	0.00645152
F1	P2	0.0187053	0.0187053
F1	V2	0.0136762	0.0136762
F1	I2	0.00280056	0.00280056
F1	C2	0.363968	0.363968
F1	Y2	0.0031426	0.0031426
F1	H2	0.552954	0.552954
F1	R2	2.69946e-06	2.69946e-06
F1	N2	6.08205e-08	6.08205e-08
F1	D2	2.70122e-09	2.70122e-09
F1	T2	0.351962	0.351962
F1	ncont2	0.00147076	0.00147076
F1	scont2	0.567602	0.567602
F1	Number.of.introns2	6.63949e-18	6.63949e-18
F1	First.intron.length2	9.22555e-18	9.22555e-18
F1	First.intron.GC2	6.43034e-18	6.43034e-18
F1	mRNA.half.life.short2	0.0798104	0.0798104
F1	Ribosome.occupancy2	8.48056e-12	8.48056e-12
F1	Ribosome.density..rb.kb.2	8.70239e-12	8.70239e-12
F1	ORF.length..nt.2	1.23437e-71	1.23437e-71
F1	GO.0006350_TRANSCRIPTION2	0.480209	0.480209
F1	GO.0006412_PROTEIN_BIOSYNTHESIS2	0.000149424	0.000149424
F1	GO.0007049_CELL_CYCLE2	0.865944	0.865944
F1	GO.0007165_SIGNAL_TRANSDUCTION2	0.379098	0.379098
F1	GO.0008150_BIOLOGICAL_PROCESS2	0.0066334	0.0066334
F1	nuc2	0.449616	0.449616
F1	vac2	0.17638	0.17638
F1	cyto2	0.288281	0.288281
F1	mito2	0.00677484	0.00677484
F1	relinstems	0.001295	0.001295
F1	length	5.54847e-65	5.54847e-65
F1	relnostems	0.121298	0.121298
F1	nstems	3.94793e-63	3.94793e-63
F1	cs3	0.933797	0.933797
F1	cs5	0.158147	0.158147
F1	csorf	9.09581e-07	9.09581e-07
F1	lu3	0.738584	0.738584
F1	u3A	0.222184	0.222184
F1	u3C	0.583516	0.583516
F1	u3T	0.0961344	0.0961344
F1	u3G	0.659986	0.659986
F1	u3AC	0.098	0.098
F1	u3AT	0.398794	0.398794
F1	u3AG	0.281093	0.281093
F1	u3CT	0.958119	0.958119
F1	u3CG	0.670601	0.670601
F1	u3TG	0.367741	0.367741
F1	X3AUel	0.751461	0.751461
F1	lu5	0.00029408	0.00029408
F1	u5A	0.00272023	0.00272023
F1	u5C	0.407178	0.407178
F1	u5T	0.000121135	0.000121135
F1	u5G	0.330814	0.330814
F1	u5AC	0.509424	0.509424
F1	u5AT	0.0782558	0.0782558
F1	u5AG	0.948746	0.948746
F1	u5CT	0.0906152	0.0906152
F1	u5CG	0.226226	0.226226
F1	u5TG	0.0645362	0.0645362
F1	X5AUel	0.000302713	0.000302713
F1	lcds	3.61456e-73	3.61456e-73
F1	cdsA	0.00669115	0.00669115
F1	cdsC	0.000963433	0.000963433
F1	cdsT	1.36377e-06	1.36377e-06
F1	cdsG	5.38693e-09	5.38693e-09
F1	cdsAC	0.840609	0.840609
F1	cdsAT	1.37982e-13	1.37982e-13
F1	cdsAG	3.50936e-08	3.50936e-08
F1	cdsCT	0.870662	0.870662
F1	cdsCG	0.00078544	0.00078544
F1	cdsTG	0.70115	0.70115
F1	cdsAUel	5.70969e-73	5.70969e-73
F1	ene	6.57027e-66	6.57027e-66
F1	halflife	0.121584	0.121584
F1	nostems	4.5948e-69	4.5948e-69
F1	relstems	6.33527e-37	6.33527e-37
F1	length.1	6.91039e-70	6.91039e-70
W1	K1	3.09874e-148	3.09874e-148
W1	Q1	2.33353e-12	2.33353e-12
W1	E1	2.58024e-191	2.58024e-191
W1	S1	1.80582e-145	1.80582e-145
W1	P1	1.55587e-91	1.55587e-91
W1	V1	0.0401638	0.0401638
W1	I1	1.95031e-11	1.95031e-11
W1	C1	7.84273e-167	7.84273e-167
W1	Y1	0.698089	0.698089
W1	H1	1.90663e-45	1.90663e-45
W1	R1	3.37025e-23	3.37025e-23
W1	N1	1.37827e-44	1.37827e-44
W1	D1	2.63012e-09	2.63012e-09
W1	T1	7.62089e-32	7.62089e-32
W1	ncont1	1.29882e-05	1.29882e-05
W1	scont1	7.29311e-206	7.29311e-206
W1	Number.of.introns1	3.25721e-14	3.25721e-14
W1	First.intron.length1	3.53843e-14	3.53843e-14
W1	First.intron.GC1	4.06148e-14	4.06148e-14
W1	mRNA.half.life.short1	3.31253e-38	3.31253e-38
W1	Ribosome.occupancy1	1.21949e-35	1.21949e-35
W1	Ribosome.density..rb.kb.1	7.67561e-40	7.67561e-40
W1	ORF.length..nt.1	3.65573e-06	3.65573e-06
W1	GO.0006350_TRANSCRIPTION1	7.80252e-16	7.80252e-16
W1	GO.0006412_PROTEIN_BIOSYNTHESIS1	4.87991e-95	4.87991e-95
[truncated: 12,536 more rows]

## Sheet: Dataset_S5
### Absolute value of average of correlations between features of the proteins and mRNA targets in 100 randomized negative sets
chromosome1	strand1	0.423306	0.423306
chromosome1	protlength1	0.152908	0.152908
chromosome1	pH1	0.139872	0.139872
chromosome1	kDa1	0.147469	0.147469
chromosome1	G1	0.616607	0.616607
chromosome1	A1	0.374702	0.374702
chromosome1	L1	0.401636	0.401636
chromosome1	F1	0.475077	0.475077
chromosome1	W1	0.13795	0.13795
chromosome1	K1	0.167685	0.167685
chromosome1	Q1	0.527089	0.527089
chromosome1	E1	0.143351	0.143351
chromosome1	P1	0.103231	0.103231
chromosome1	V1	0.268238	0.268238
chromosome1	I1	0.420224	0.420224
chromosome1	C1	0.101179	0.101179
chromosome1	Y1	0.33369	0.33369
chromosome1	H1	0.169097	0.169097
chromosome1	R1	0.199816	0.199816
chromosome1	N1	0.577203	0.577203
chromosome1	D1	0.587736	0.587736
chromosome1	T1	0.171288	0.171288
chromosome1	ncont1	0.316208	0.316208
chromosome1	mRNA.half.life.short1	0.22259	0.22259
chromosome1	Ribosome.occupancy1	0.289645	0.289645
chromosome1	Ribosome.density..rb.kb.1	0.358636	0.358636
chromosome1	ORF.length..nt.1	0.152908	0.152908
chromosome1	mRNA.level1	0.411934	0.411934
chromosome1	GO.0006350_TRANSCRIPTION1	0.0874796	0.0874796
chromosome1	GO.0006412_PROTEIN_BIOSYNTHESIS1	0.410036	0.410036
chromosome1	GO.0006810_TRANSPORT1	0.491614	0.491614
chromosome1	GO.0008150_BIOLOGICAL_PROCESS1	0.281869	0.281869
chromosome1	GO.0016070_RNA_METABOLISM1	0.252976	0.252976
chromosome1	nuc1	0.145334	0.145334
chromosome1	cyto1	0.0883532	0.0883532
chromosome1	MOLECULAR.WEIGHT..in.Daltons.	0.147469	0.147469
chromosome1	PI	0.139872	0.139872
chromosome1	CAI..Codon.Adaptation.Index.	0.333094	0.333094
chromosome1	PROTEIN.LENGTH	0.152908	0.152908
chromosome1	CODON.BIAS	0.457552	0.457552
chromosome1	ALA	0.124286	0.124286
chromosome1	ARG	0.31625	0.31625
chromosome1	ASN	0.309321	0.309321
chromosome1	ASP	0.318141	0.318141
chromosome1	GLN	0.423241	0.423241
chromosome1	GLU	0.218125	0.218125
chromosome1	GLY	0.533314	0.533314
chromosome1	HIS	0.176309	0.176309
chromosome1	ILE	0.274426	0.274426
chromosome1	LEU	0.282557	0.282557
chromosome1	LYS	0.116437	0.116437
chromosome1	PHE	0.26011	0.26011
chromosome1	PRO	0.211201	0.211201
chromosome1	THR	0.114205	0.114205
chromosome1	TRP	0.189393	0.189393
chromosome1	TYR	0.150642	0.150642
chromosome1	VAL	0.133993	0.133993
chromosome1	FOP.SCORE..Frequency.of.Optimal.Codons.	0.454729	0.454729
chromosome1	AROMATICITY.SCORE..Frequency.of.aromatic.amino.acids..Phe..Tyr..Trp.	0.348987	0.348987
chromosome1	econt	0.342801	0.342801
chromosome1	ccont	0.125329	0.125329
chromosome1	hcont	0.313628	0.313628
chromosome1	econtrel	0.344282	0.344282
chromosome1	ccontrel	0.123041	0.123041
chromosome1	hcontrel	0.286413	0.286413
strand1	start1	0.19088	0.19088
strand1	stop1	0.19088	0.19088
strand1	protlength1	0.345414	0.345414
strand1	pH1	0.223917	0.223917
strand1	kDa1	0.332008	0.332008
strand1	G1	0.528227	0.528227
strand1	A1	0.292531	0.292531
strand1	L1	0.380887	0.380887
strand1	M1	0.53588	0.53588
strand1	F1	0.580608	0.580608
strand1	K1	0.53011	0.53011
strand1	Q1	0.233062	0.233062
strand1	E1	0.363523	0.363523
strand1	S1	0.268687	0.268687
strand1	P1	0.427697	0.427697
strand1	V1	0.313592	0.313592
strand1	I1	0.487139	0.487139
strand1	C1	0.293563	0.293563
strand1	Y1	0.548745	0.548745
strand1	H1	0.495842	0.495842
strand1	D1	0.488244	0.488244
strand1	T1	0.554972	0.554972
strand1	ncont1	0.116071	0.116071
strand1	scont1	0.552041	0.552041
strand1	Number.of.introns1	0.13372	0.13372
strand1	First.intron.length1	0.133713	0.133713
strand1	First.intron.GC1	0.133713	0.133713
strand1	mRNA.half.life.short1	0.595893	0.595893
strand1	Ribosome.occupancy1	0.297085	0.297085
strand1	Ribosome.density..rb.kb.1	0.555633	0.555633
strand1	ORF.length..nt.1	0.345414	0.345414
strand1	GO.0006350_TRANSCRIPTION1	0.471786	0.471786
strand1	GO.0006412_PROTEIN_BIOSYNTHESIS1	0.395598	0.395598
strand1	GO.0006810_TRANSPORT1	0.219563	0.219563
strand1	GO.0008150_BIOLOGICAL_PROCESS1	0.20455	0.20455
strand1	cyto1	0.604735	0.604735
strand1	er1	0.257616	0.257616
strand1	MOLECULAR.WEIGHT..in.Daltons.	0.332008	0.332008
strand1	PI	0.223917	0.223917
strand1	PROTEIN.LENGTH	0.345414	0.345414
strand1	CODON.BIAS	0.131792	0.131792
strand1	ALA	0.101488	0.101488
strand1	ARG	0.474285	0.474285
strand1	ASN	0.218546	0.218546
strand1	ASP	0.697615	0.697615
strand1	GLN	0.187831	0.187831
strand1	GLU	0.4211	0.4211
strand1	ILE	0.528921	0.528921
strand1	LEU	0.487429	0.487429
strand1	LYS	0.528759	0.528759
strand1	MET	0.410217	0.410217
strand1	SER	0.309408	0.309408
strand1	THR	0.466234	0.466234
strand1	TRP	0.168166	0.168166
strand1	TYR	0.104189	0.104189
strand1	VAL	0.312827	0.312827
strand1	FOP.SCORE..Frequency.of.Optimal.Codons.	0.129308	0.129308
strand1	AROMATICITY.SCORE..Frequency.of.aromatic.amino.acids..Phe..Tyr..Trp.	0.554896	0.554896
strand1	ccont	0.156534	0.156534
strand1	hcont	0.580323	0.580323
strand1	econtrel	0.372877	0.372877
strand1	ccontrel	0.29296	0.29296
strand1	hcontrel	0.476241	0.476241
start1	stop1	1	1
start1	protlength1	0.498636	0.498636
start1	pH1	0.213465	0.213465
start1	kDa1	0.491988	0.491988
start1	G1	0.248257	0.248257
start1	A1	0.384863	0.384863
start1	L1	0.305928	0.305928
start1	M1	0.266692	0.266692
start1	K1	0.101843	0.101843
start1	Q1	0.23206	0.23206
start1	E1	0.438435	0.438435
start1	S1	0.340158	0.340158
start1	V1	0.25903	0.25903
start1	I1	0.53612	0.53612
start1	C1	0.593402	0.593402
start1	R1	0.302031	0.302031
start1	N1	0.251705	0.251705
start1	T1	0.599559	0.599559
start1	ncont1	0.476861	0.476861
start1	scont1	0.306019	0.306019
start1	Number.of.introns1	0.136544	0.136544
start1	First.intron.length1	0.136691	0.136691
start1	First.intron.GC1	0.135456	0.135456
start1	mRNA.half.life.short1	0.109813	0.109813
start1	Ribosome.occupancy1	0.431923	0.431923
start1	Ribosome.density..rb.kb.1	0.499992	0.499992
start1	ORF.length..nt.1	0.499004	0.499004
start1	mRNA.level1	0.220373	0.220373
start1	GO.0006350_TRANSCRIPTION1	0.573754	0.573754
start1	GO.0006810_TRANSPORT1	0.3733	0.3733
start1	GO.0008150_BIOLOGICAL_PROCESS1	0.227735	0.227735
start1	cyto1	0.128919	0.128919
start1	MOLECULAR.WEIGHT..in.Daltons.	0.491988	0.491988
start1	PI	0.213465	0.213465
start1	CAI..Codon.Adaptation.Index.	0.510507	0.510507
start1	PROTEIN.LENGTH	0.498636	0.498636
start1	CODON.BIAS	0.552817	0.552817
start1	ALA	0.570977	0.570977
start1	ARG	0.215652	0.215652
start1	ASN	0.498473	0.498473
start1	ASP	0.423533	0.423533
start1	CYS	0.71368	0.71368
start1	HIS	0.396807	0.396807
start1	ILE	0.633198	0.633198
start1	LEU	0.432331	0.432331
start1	LYS	0.251917	0.251917
start1	MET	0.269873	0.269873
start1	PHE	0.397278	0.397278
start1	PRO	0.315533	0.315533
start1	SER	0.468874	0.468874
start1	THR	0.682354	0.682354
start1	TRP	0.262298	0.262298
start1	TYR	0.435352	0.435352
start1	VAL	0.474827	0.474827
start1	FOP.SCORE..Frequency.of.Optimal.Codons.	0.552534	0.552534
start1	GRAVY.SCORE..Hydropathicity.of.Protein.	0.763247	0.763247
start1	econt	0.276523	0.276523
start1	ccont	0.481114	0.481114
start1	hcont	0.362059	0.362059
start1	econtrel	0.166972	0.166972
start1	ccontrel	0.0870763	0.0870763
start1	hcontrel	0.171742	0.171742
stop1	protlength1	0.498636	0.498636
stop1	pH1	0.213465	0.213465
stop1	kDa1	0.491988	0.491988
stop1	G1	0.248257	0.248257
stop1	A1	0.384863	0.384863
stop1	L1	0.305928	0.305928
stop1	M1	0.266692	0.266692
stop1	K1	0.101843	0.101843
stop1	Q1	0.23206	0.23206
stop1	E1	0.438435	0.438435
stop1	S1	0.340158	0.340158
stop1	V1	0.25903	0.25903
stop1	I1	0.53612	0.53612
stop1	C1	0.593402	0.593402
stop1	R1	0.302031	0.302031
stop1	N1	0.251705	0.251705
stop1	T1	0.599559	0.599559
stop1	ncont1	0.476861	0.476861
stop1	scont1	0.306019	0.306019
stop1	Number.of.introns1	0.136544	0.136544
stop1	First.intron.length1	0.136691	0.136691
stop1	First.intron.GC1	0.135456	0.135456
stop1	mRNA.half.life.short1	0.109813	0.109813
stop1	Ribosome.occupancy1	0.431923	0.431923
stop1	Ribosome.density..rb.kb.1	0.499992	0.499992
stop1	ORF.length..nt.1	0.499004	0.499004
stop1	mRNA.level1	0.220373	0.220373
stop1	GO.0006350_TRANSCRIPTION1	0.573754	0.573754
stop1	GO.0006810_TRANSPORT1	0.3733	0.3733
stop1	GO.0008150_BIOLOGICAL_PROCESS1	0.227735	0.227735
stop1	cyto1	0.128919	0.128919
stop1	MOLECULAR.WEIGHT..in.Daltons.	0.491988	0.491988
stop1	PI	0.213465	0.213465
stop1	CAI..Codon.Adaptation.Index.	0.510507	0.510507
stop1	PROTEIN.LENGTH	0.498636	0.498636
stop1	CODON.BIAS	0.552817	0.552817
stop1	ALA	0.570977	0.570977
stop1	ARG	0.215652	0.215652
stop1	ASN	0.498473	0.498473
stop1	ASP	0.423533	0.423533
stop1	CYS	0.71368	0.71368
stop1	HIS	0.396807	0.396807
stop1	ILE	0.633198	0.633198
stop1	LEU	0.432331	0.432331
stop1	LYS	0.251917	0.251917
stop1	MET	0.269873	0.269873
stop1	PHE	0.397278	0.397278
stop1	PRO	0.315533	0.315533
stop1	SER	0.468874	0.468874
stop1	THR	0.682354	0.682354
stop1	TRP	0.262298	0.262298
stop1	TYR	0.435352	0.435352
stop1	VAL	0.474827	0.474827
stop1	FOP.SCORE..Frequency.of.Optimal.Codons.	0.552534	0.552534
stop1	GRAVY.SCORE..Hydropathicity.of.Protein.	0.763247	0.763247
stop1	econt	0.276523	0.276523
stop1	ccont	0.481114	0.481114
stop1	hcont	0.362059	0.362059
stop1	econtrel	0.166972	0.166972
stop1	ccontrel	0.0870763	0.0870763
stop1	hcontrel	0.171742	0.171742
protlength1	pH1	0.267924	0.267924
protlength1	kDa1	0.998399	0.998399
protlength1	G1	0.500415	0.500415
protlength1	A1	0.408782	0.408782
protlength1	L1	0.530251	0.530251
protlength1	M1	0.164871	0.164871
protlength1	F1	0.16537	0.16537
protlength1	K1	0.420001	0.420001
protlength1	Q1	0.128035	0.128035
protlength1	E1	0.172711	0.172711
protlength1	S1	0.139103	0.139103
protlength1	P1	0.108619	0.108619
protlength1	V1	0.416921	0.416921
protlength1	I1	0.474872	0.474872
protlength1	C1	0.117161	0.117161
protlength1	H1	0.11692	0.11692
protlength1	R1	0.61058	0.61058
protlength1	N1	0.101915	0.101915
protlength1	D1	0.172403	0.172403
protlength1	T1	0.608544	0.608544
protlength1	ncont1	0.526373	0.526373
protlength1	scont1	0.120254	0.120254
protlength1	mRNA.half.life.short1	0.33135	0.33135
protlength1	Ribosome.occupancy1	0.372657	0.372657
protlength1	Ribosome.density..rb.kb.1	0.437092	0.437092
protlength1	ORF.length..nt.1	0.999631	0.999631
protlength1	GO.0006350_TRANSCRIPTION1	0.635312	0.635312
protlength1	GO.0006412_PROTEIN_BIOSYNTHESIS1	0.257547	0.257547
protlength1	GO.0006810_TRANSPORT1	0.447433	0.447433
protlength1	GO.0008150_BIOLOGICAL_PROCESS1	0.177337	0.177337
protlength1	nuc1	0.324162	0.324162
protlength1	er1	0.544351	0.544351
protlength1	MOLECULAR.WEIGHT..in.Daltons.	0.998399	0.998399
protlength1	PI	0.267924	0.267924
protlength1	CAI..Codon.Adaptation.Index.	0.091017	0.091017
protlength1	PROTEIN.LENGTH	1	1
protlength1	CODON.BIAS	0.148188	0.148188
protlength1	ALA	0.848676	0.848676
protlength1	ARG	0.445261	0.445261
protlength1	ASN	0.75661	0.75661
protlength1	ASP	0.810307	0.810307
protlength1	CYS	0.580359	0.580359
protlength1	GLN	0.270542	0.270542
protlength1	GLU	0.495973	0.495973
protlength1	GLY	0.366994	0.366994
protlength1	HIS	0.693255	0.693255
protlength1	ILE	0.801032	0.801032
protlength1	LEU	0.833344	0.833344
protlength1	LYS	0.723414	0.723414
protlength1	MET	0.417957	0.417957
protlength1	PHE	0.712358	0.712358
protlength1	PRO	0.618517	0.618517
protlength1	SER	0.702706	0.702706
protlength1	THR	0.874988	0.874988
protlength1	TRP	0.30587	0.30587
protlength1	TYR	0.834318	0.834318
protlength1	VAL	0.944987	0.944987
protlength1	FOP.SCORE..Frequency.of.Optimal.Codons.	0.141935	0.141935
protlength1	GRAVY.SCORE..Hydropathicity.of.Protein.	0.648179	0.648179
protlength1	AROMATICITY.SCORE..Frequency.of.aromatic.amino.acids..Phe..Tyr..Trp.	0.187217	0.187217
protlength1	econt	0.470062	0.470062
protlength1	ccont	0.778224	0.778224
protlength1	hcont	0.793985	0.793985
protlength1	econtrel	0.0914604	0.0914604
protlength1	ccontrel	0.358882	0.358882
protlength1	hcontrel	0.521498	0.521498
pH1	kDa1	0.274566	0.274566
pH1	G1	0.563445	0.563445
pH1	A1	0.145986	0.145986
pH1	L1	0.812379	0.812379
pH1	M1	0.378792	0.378792
pH1	F1	0.365313	0.365313
pH1	W1	0.4877	0.4877
pH1	K1	0.507539	0.507539
pH1	S1	0.239837	0.239837
pH1	P1	0.336378	0.336378
pH1	V1	0.175446	0.175446
pH1	I1	0.392068	0.392068
pH1	H1	0.0932362	0.0932362
pH1	R1	0.10746	0.10746
pH1	D1	0.109577	0.109577
pH1	T1	0.490494	0.490494
pH1	ncont1	0.228103	0.228103
pH1	scont1	0.299533	0.299533
pH1	Number.of.introns1	0.161582	0.161582
pH1	First.intron.length1	0.162074	0.162074
pH1	First.intron.GC1	0.161875	0.161875
pH1	mRNA.half.life.short1	0.355966	0.355966
pH1	Ribosome.occupancy1	0.0899654	0.0899654
pH1	Ribosome.density..rb.kb.1	0.348235	0.348235
pH1	ORF.length..nt.1	0.265121	0.265121
pH1	GO.0006412_PROTEIN_BIOSYNTHESIS1	0.126766	0.126766
pH1	GO.0006810_TRANSPORT1	0.166069	0.166069
pH1	GO.0016070_RNA_METABOLISM1	0.117048	0.117048
pH1	cyto1	0.124146	0.124146
pH1	er1	0.352844	0.352844
pH1	MOLECULAR.WEIGHT..in.Daltons.	0.274566	0.274566
pH1	PI	1	1
pH1	PROTEIN.LENGTH	0.267924	0.267924
pH1	CODON.BIAS	0.112718	0.112718
pH1	ASP	0.394529	0.394529
pH1	CYS	0.0994919	0.0994919
pH1	GLY	0.42233	0.42233
pH1	ILE	0.43944	0.43944
pH1	LEU	0.58239	0.58239
pH1	LYS	0.463048	0.463048
pH1	MET	0.387049	0.387049
pH1	PHE	0.252233	0.252233
pH1	PRO	0.11972	0.11972
pH1	SER	0.0973904	0.0973904
pH1	THR	0.337929	0.337929
pH1	TRP	0.29925	0.29925
pH1	VAL	0.293215	0.293215
pH1	FOP.SCORE..Frequency.of.Optimal.Codons.	0.113613	0.113613
pH1	GRAVY.SCORE..Hydropathicity.of.Protein.	0.277336	0.277336
pH1	AROMATICITY.SCORE..Frequency.of.aromatic.amino.acids..Phe..Tyr..Trp.	0.333553	0.333553
pH1	econt	0.376813	0.376813
pH1	ccont	0.10141	0.10141
pH1	hcont	0.512173	0.512173
pH1	econtrel	0.395404	0.395404
pH1	ccontrel	0.424872	0.424872
pH1	hcontrel	0.660625	0.660625
kDa1	G1	0.500467	0.500467
kDa1	A1	0.40467	0.40467
kDa1	L1	0.5363	0.5363
kDa1	M1	0.164038	0.164038
kDa1	F1	0.160637	0.160637
kDa1	W1	0.0913802	0.0913802
kDa1	K1	0.403886	0.403886
kDa1	Q1	0.113658	0.113658
kDa1	E1	0.172778	0.172778
kDa1	S1	0.118101	0.118101
kDa1	P1	0.0919962	0.0919962
kDa1	V1	0.423323	0.423323
kDa1	I1	0.472591	0.472591
kDa1	C1	0.109623	0.109623
kDa1	H1	0.0903228	0.0903228
kDa1	R1	0.609111	0.609111
kDa1	N1	0.0987977	0.0987977
kDa1	D1	0.187788	0.187788
kDa1	T1	0.59909	0.59909
kDa1	ncont1	0.505582	0.505582
kDa1	scont1	0.117735	0.117735
kDa1	mRNA.half.life.short1	0.348592	0.348592
kDa1	Ribosome.occupancy1	0.34586	0.34586
kDa1	Ribosome.density..rb.kb.1	0.432928	0.432928
kDa1	ORF.length..nt.1	0.998031	0.998031
kDa1	GO.0006350_TRANSCRIPTION1	0.634552	0.634552
kDa1	GO.0006412_PROTEIN_BIOSYNTHESIS1	0.257258	0.257258
kDa1	GO.0006810_TRANSPORT1	0.419145	0.419145
kDa1	GO.0008150_BIOLOGICAL_PROCESS1	0.177138	0.177138
kDa1	nuc1	0.308043	0.308043
kDa1	er1	0.548355	0.548355
kDa1	MOLECULAR.WEIGHT..in.Daltons.	1	1
kDa1	PI	0.274566	0.274566
kDa1	CAI..Codon.Adaptation.Index.	0.096786	0.096786
kDa1	PROTEIN.LENGTH	0.998399	0.998399
kDa1	CODON.BIAS	0.150117	0.150117
kDa1	ALA	0.843063	0.843063
kDa1	ARG	0.447761	0.447761
kDa1	ASN	0.75274	0.75274
kDa1	ASP	0.805347	0.805347
kDa1	CYS	0.572719	0.572719
kDa1	GLN	0.276414	0.276414
kDa1	GLU	0.486876	0.486876
kDa1	GLY	0.374552	0.374552
kDa1	HIS	0.711134	0.711134
kDa1	ILE	0.798296	0.798296
kDa1	LEU	0.837815	0.837815
kDa1	LYS	0.712988	0.712988
kDa1	MET	0.417952	0.417952
kDa1	PHE	0.717239	0.717239
kDa1	PRO	0.630542	0.630542
kDa1	SER	0.679774	0.679774
kDa1	THR	0.867774	0.867774
kDa1	TRP	0.296698	0.296698
kDa1	TYR	0.845761	0.845761
kDa1	VAL	0.949041	0.949041
kDa1	FOP.SCORE..Frequency.of.Optimal.Codons.	0.143738	0.143738
kDa1	GRAVY.SCORE..Hydropathicity.of.Protein.	0.648596	0.648596
kDa1	AROMATICITY.SCORE..Frequency.of.aromatic.amino.acids..Phe..Tyr..Trp.	0.172134	0.172134
kDa1	econt	0.466459	0.466459
kDa1	ccont	0.77947	0.77947
kDa1	hcont	0.792965	0.792965
kDa1	econtrel	0.0865373	0.0865373
kDa1	ccontrel	0.358908	0.358908
kDa1	hcontrel	0.51747	0.51747
G1	A1	0.174268	0.174268
G1	L1	0.827699	0.827699
G1	M1	0.272928	0.272928
G1	F1	0.72412	0.72412
G1	W1	0.170385	0.170385
G1	K1	0.60134	0.60134
G1	Q1	0.132328	0.132328
G1	P1	0.428482	0.428482
G1	V1	0.537249	0.537249
G1	I1	0.821794	0.821794
G1	Y1	0.58743	0.58743
G1	H1	0.187041	0.187041
G1	R1	0.490622	0.490622
G1	N1	0.461877	0.461877
G1	D1	0.40369	0.40369
G1	T1	0.645225	0.645225
G1	scont1	0.252161	0.252161
G1	Number.of.introns1	0.0934766	0.0934766
G1	First.intron.length1	0.0935445	0.0935445
G1	First.intron.GC1	0.0922154	0.0922154
G1	mRNA.half.life.short1	0.455807	0.455807
G1	Ribosome.occupancy1	0.13925	0.13925
G1	Ribosome.density..rb.kb.1	0.695826	0.695826
G1	ORF.length..nt.1	0.501578	0.501578
G1	mRNA.level1	0.255758	0.255758
G1	GO.0006350_TRANSCRIPTION1	0.417334	0.417334
G1	GO.0006412_PROTEIN_BIOSYNTHESIS1	0.361779	0.361779
G1	GO.0006810_TRANSPORT1	0.545372	0.545372
G1	nuc1	0.362827	0.362827
G1	cyto1	0.186005	0.186005
G1	er1	0.315476	0.315476
G1	MOLECULAR.WEIGHT..in.Daltons.	0.500467	0.500467
G1	PI	0.563445	0.563445
G1	CAI..Codon.Adaptation.Index.	0.273255	0.273255
G1	PROTEIN.LENGTH	0.500415	0.500415
G1	CODON.BIAS	0.407465	0.407465
G1	ALA	0.243038	0.243038
G1	ASN	0.438839	0.438839
G1	ASP	0.703917	0.703917
G1	CYS	0.161765	0.161765
G1	GLN	0.193563	0.193563
G1	GLU	0.18376	0.18376
G1	GLY	0.385875	0.385875
G1	HIS	0.156503	0.156503
G1	ILE	0.768533	0.768533
G1	LEU	0.825347	0.825347
G1	LYS	0.660245	0.660245
G1	MET	0.111339	0.111339
G1	SER	0.204449	0.204449
G1	THR	0.532437	0.532437
G1	VAL	0.509078	0.509078
G1	FOP.SCORE..Frequency.of.Optimal.Codons.	0.401007	0.401007
G1	GRAVY.SCORE..Hydropathicity.of.Protein.	0.388816	0.388816
G1	AROMATICITY.SCORE..Frequency.of.aromatic.amino.acids..Phe..Tyr..Trp.	0.734134	0.734134
G1	econt	0.286071	0.286071
G1	hcont	0.82546	0.82546
G1	econtrel	0.547327	0.547327
G1	ccontrel	0.554438	0.554438
G1	hcontrel	0.804031	0.804031
A1	L1	0.0885156	0.0885156
A1	M1	0.423475	0.423475
A1	F1	0.345401	0.345401
A1	K1	0.129425	0.129425
A1	Q1	0.137954	0.137954
A1	E1	0.224725	0.224725
A1	P1	0.0840485	0.0840485
A1	V1	0.279988	0.279988
A1	I1	0.0816542	0.0816542
A1	C1	0.221935	0.221935
A1	Y1	0.16266	0.16266
A1	R1	0.453146	0.453146
A1	N1	0.148249	0.148249
A1	D1	0.384543	0.384543
A1	ncont1	0.654116	0.654116
A1	scont1	0.330699	0.330699
A1	Number.of.introns1	0.152378	0.152378
A1	First.intron.length1	0.152666	0.152666
A1	First.intron.GC1	0.153078	0.153078
A1	mRNA.half.life.short1	0.506953	0.506953
A1	Ribosome.occupancy1	0.182516	0.182516
A1	Ribosome.density..rb.kb.1	0.226604	0.226604
A1	ORF.length..nt.1	0.411191	0.411191
A1	mRNA.level1	0.361478	0.361478
A1	GO.0006350_TRANSCRIPTION1	0.126753	0.126753
A1	GO.0006412_PROTEIN_BIOSYNTHESIS1	0.628447	0.628447
A1	GO.0006810_TRANSPORT1	0.381664	0.381664
A1	GO.0016070_RNA_METABOLISM1	0.333397	0.333397
A1	nuc1	0.44564	0.44564
A1	cyto1	0.466006	0.466006
A1	er1	0.370127	0.370127
A1	MOLECULAR.WEIGHT..in.Daltons.	0.40467	0.40467
A1	PI	0.145986	0.145986
A1	CAI..Codon.Adaptation.Index.	0.255544	0.255544
A1	PROTEIN.LENGTH	0.408782	0.408782
A1	CODON.BIAS	0.259101	0.259101
A1	ALA	0.780924	0.780924
A1	ASN	0.295485	0.295485
A1	CYS	0.280563	0.280563
A1	GLN	0.106141	0.106141
A1	GLU	0.244083	0.244083
A1	GLY	0.242391	0.242391
A1	HIS	0.2486	0.2486
A1	ILE	0.236582	0.236582
A1	LEU	0.118933	0.118933
A1	LYS	0.243523	0.243523
A1	MET	0.446841	0.446841
A1	PHE	0.515327	0.515327
A1	PRO	0.179173	0.179173
A1	SER	0.409349	0.409349
A1	THR	0.325052	0.325052
A1	TRP	0.165022	0.165022
A1	TYR	0.415966	0.415966
A1	VAL	0.411839	0.411839
A1	FOP.SCORE..Frequency.of.Optimal.Codons.	0.262972	0.262972
A1	GRAVY.SCORE..Hydropathicity.of.Protein.	0.571478	0.571478
A1	AROMATICITY.SCORE..Frequency.of.aromatic.amino.acids..Phe..Tyr..Trp.	0.159295	0.159295
A1	econt	0.697763	0.697763
A1	ccont	0.371144	0.371144
A1	hcont	0.146395	0.146395
A1	econtrel	0.648586	0.648586
A1	ccontrel	0.267264	0.267264
L1	M1	0.276756	0.276756
L1	F1	0.530415	0.530415
L1	W1	0.333294	0.333294
L1	K1	0.662844	0.662844
L1	P1	0.433548	0.433548
L1	V1	0.351979	0.351979
L1	I1	0.627085	0.627085
L1	Y1	0.263816	0.263816
L1	H1	0.205433	0.205433
L1	R1	0.310734	0.310734
L1	N1	0.13476	0.13476
L1	D1	0.275119	0.275119
L1	T1	0.680778	0.680778
L1	scont1	0.217419	0.217419
L1	mRNA.half.life.short1	0.375642	0.375642
L1	Ribosome.density..rb.kb.1	0.508608	0.508608
L1	ORF.length..nt.1	0.529882	0.529882
L1	GO.0006350_TRANSCRIPTION1	0.32823	0.32823
L1	GO.0006810_TRANSPORT1	0.445289	0.445289
L1	GO.0016070_RNA_METABOLISM1	0.1941	0.1941
L1	nuc1	0.216875	0.216875
L1	cyto1	0.193101	0.193101
L1	er1	0.452514	0.452514
L1	MOLECULAR.WEIGHT..in.Daltons.	0.5363	0.5363
L1	PI	0.812379	0.812379
L1	CAI..Codon.Adaptation.Index.	0.109102	0.109102
L1	PROTEIN.LENGTH	0.530251	0.530251
L1	CODON.BIAS	0.230048	0.230048
L1	ALA	0.279488	0.279488
L1	ASN	0.221987	0.221987
L1	ASP	0.659911	0.659911
L1	CYS	0.259256	0.259256
L1	GLN	0.0897677	0.0897677
L1	GLU	0.164424	0.164424
L1	GLY	0.351916	0.351916
L1	HIS	0.168804	0.168804
L1	ILE	0.669134	0.669134
L1	LEU	0.843724	0.843724
L1	LYS	0.700337	0.700337
L1	MET	0.192674	0.192674
L1	SER	0.142336	0.142336
L1	THR	0.53695	0.53695
L1	TYR	0.176606	0.176606
L1	VAL	0.527903	0.527903
L1	FOP.SCORE..Frequency.of.Optimal.Codons.	0.228722	0.228722
L1	GRAVY.SCORE..Hydropathicity.of.Protein.	0.452588	0.452588
L1	AROMATICITY.SCORE..Frequency.of.aromatic.amino.acids..Phe..Tyr..Trp.	0.513785	0.513785
L1	econt	0.261874	0.261874
L1	hcont	0.812058	0.812058
L1	econtrel	0.453028	0.453028
L1	ccontrel	0.590093	0.590093
L1	hcontrel	0.871908	0.871908
M1	F1	0.482974	0.482974
M1	W1	0.453926	0.453926
M1	K1	0.500116	0.500116
M1	Q1	0.473772	0.473772
M1	E1	0.726946	0.726946
M1	S1	0.0914646	0.0914646
M1	P1	0.487876	0.487876
M1	V1	0.145491	0.145491
M1	I1	0.247321	0.247321
M1	C1	0.628327	0.628327
M1	Y1	0.4161	0.4161
M1	H1	0.356806	0.356806
M1	R1	0.438885	0.438885
M1	N1	0.373189	0.373189
M1	D1	0.138491	0.138491
M1	T1	0.301319	0.301319
M1	ncont1	0.0915133	0.0915133
M1	scont1	0.963137	0.963137
M1	mRNA.half.life.short1	0.489862	0.489862
M1	Ribosome.density..rb.kb.1	0.190295	0.190295
M1	ORF.length..nt.1	0.168284	0.168284
M1	mRNA.level1	0.175684	0.175684
M1	GO.0006412_PROTEIN_BIOSYNTHESIS1	0.340409	0.340409
M1	GO.0006810_TRANSPORT1	0.225889	0.225889
M1	nuc1	0.101944	0.101944
M1	cyto1	0.673254	0.673254
M1	er1	0.224854	0.224854
M1	MOLECULAR.WEIGHT..in.Daltons.	0.164038	0.164038
M1	PI	0.378792	0.378792
M1	CAI..Codon.Adaptation.Index.	0.269995	0.269995
M1	PROTEIN.LENGTH	0.164871	0.164871
M1	CODON.BIAS	0.262866	0.262866
M1	ALA	0.304852	0.304852
M1	ARG	0.336993	0.336993
M1	ASN	0.453257	0.453257
M1	ASP	0.18904	0.18904
M1	CYS	0.423328	0.423328
M1	GLN	0.681448	0.681448
M1	GLU	0.398662	0.398662
M1	HIS	0.143969	0.143969
M1	ILE	0.15798	0.15798
M1	LEU	0.190339	0.190339
M1	LYS	0.330128	0.330128
M1	MET	0.906568	0.906568
M1	PHE	0.393084	0.393084
M1	PRO	0.17288	0.17288
M1	SER	0.096193	0.096193
M1	TRP	0.418122	0.418122
M1	TYR	0.252393	0.252393
M1	VAL	0.109779	0.109779
M1	FOP.SCORE..Frequency.of.Optimal.Codons.	0.262592	0.262592
M1	GRAVY.SCORE..Hydropathicity.of.Protein.	0.153844	0.153844
M1	AROMATICITY.SCORE..Frequency.of.aromatic.amino.acids..Phe..Tyr..Trp.	0.499251	0.499251
M1	econt	0.345882	0.345882
M1	ccont	0.270707	0.270707
M1	hcont	0.276598	0.276598
M1	econtrel	0.611601	0.611601
M1	ccontrel	0.244668	0.244668
M1	hcontrel	0.373351	0.373351
F1	K1	0.541091	0.541091
F1	E1	0.314081	0.314081
F1	S1	0.159176	0.159176
F1	P1	0.335213	0.335213
F1	V1	0.319145	0.319145
F1	I1	0.541047	0.541047
F1	C1	0.381174	0.381174
F1	Y1	0.650435	0.650435
F1	H1	0.188411	0.188411
F1	R1	0.139922	0.139922
F1	N1	0.168561	0.168561
F1	D1	0.53033	0.53033
F1	T1	0.451175	0.451175
F1	scont1	0.515549	0.515549
F1	Number.of.introns1	0.103169	0.103169
F1	First.intron.length1	0.102598	0.102598
F1	First.intron.GC1	0.101848	0.101848
F1	mRNA.half.life.short1	0.445812	0.445812
F1	Ribosome.density..rb.kb.1	0.597614	0.597614
F1	ORF.length..nt.1	0.164499	0.164499
F1	mRNA.level1	0.156843	0.156843
F1	GO.0006350_TRANSCRIPTION1	0.423747	0.423747
F1	GO.0006412_PROTEIN_BIOSYNTHESIS1	0.51456	0.51456
F1	GO.0006810_TRANSPORT1	0.309679	0.309679
F1	GO.0008150_BIOLOGICAL_PROCESS1	0.29894	0.29894
F1	cyto1	0.557156	0.557156
F1	er1	0.181376	0.181376
F1	MOLECULAR.WEIGHT..in.Daltons.	0.160637	0.160637
F1	PI	0.365313	0.365313
F1	CAI..Codon.Adaptation.Index.	0.110359	0.110359
F1	PROTEIN.LENGTH	0.16537	0.16537
F1	CODON.BIAS	0.159627	0.159627
F1	ASN	0.105261	0.105261
F1	ASP	0.486341	0.486341
F1	CYS	0.166223	0.166223
F1	GLU	0.231476	0.231476
F1	GLY	0.268854	0.268854
F1	ILE	0.475809	0.475809
F1	LEU	0.531554	0.531554
F1	LYS	0.494893	0.494893
F1	MET	0.363262	0.363262
F1	PHE	0.425633	0.425633
F1	SER	0.145224	0.145224
F1	THR	0.310485	0.310485
F1	TRP	0.126455	0.126455
F1	TYR	0.171576	0.171576
F1	VAL	0.154001	0.154001
F1	FOP.SCORE..Frequency.of.Optimal.Codons.	0.160432	0.160432
F1	AROMATICITY.SCORE..Frequency.of.aromatic.amino.acids..Phe..Tyr..Trp.	0.894164	0.894164
F1	econt	0.351415	0.351415
F1	hcont	0.592928	0.592928
F1	econtrel	0.622697	0.622697
F1	ccontrel	0.352712	0.352712
F1	hcontrel	0.62521	0.62521
W1	K1	0.416683	0.416683
W1	Q1	0.1177	0.1177
W1	E1	0.467745	0.467745
W1	S1	0.413085	0.413085
W1	P1	0.331993	0.331993
W1	I1	0.112644	0.112644
W1	C1	0.439807	0.439807
W1	H1	0.234945	0.234945
W1	R1	0.16593	0.16593
W1	N1	0.232687	0.232687
W1	D1	0.100011	0.100011
W1	T1	0.195865	0.195865
W1	scont1	0.483193	0.483193
W1	Number.of.introns1	0.12727	0.12727
W1	First.intron.length1	0.127092	0.127092
W1	First.intron.GC1	0.126794	0.126794
W1	mRNA.half.life.short1	0.215105	0.215105
W1	Ribosome.occupancy1	0.207575	0.207575
W1	Ribosome.density..rb.kb.1	0.219757	0.219757
W1	mRNA.level1	0.16646	0.16646
W1	GO.0006350_TRANSCRIPTION1	0.135077	0.135077
W1	GO.0006412_PROTEIN_BIOSYNTHESIS1	0.338042	0.338042
W1	cyto1	0.0939873	0.0939873
W1	er1	0.513223	0.513223
W1	MOLECULAR.WEIGHT..in.Daltons.	0.0913802	0.0913802
W1	PI	0.4877	0.4877
W1	CAI..Codon.Adaptation.Index.	0.362456	0.362456
W1	CODON.BIAS	0.30377	0.30377
W1	ASN	0.31843	0.31843
W1	ASP	0.160519	0.160519
W1	CYS	0.408707	0.408707
W1	GLN	0.25994	0.25994
W1	GLU	0.374441	0.374441
W1	GLY	0.135618	0.135618
W1	ILE	0.198046	0.198046
W1	LEU	0.207295	0.207295
W1	LYS	0.33233	0.33233
W1	MET	0.383403	0.383403
W1	PHE	0.102218	0.102218
W1	PRO	0.113997	0.113997
W1	SER	0.264946	0.264946
W1	THR	0.108105	0.108105
W1	TRP	0.899065	0.899065
W1	VAL	0.172717	0.172717
W1	FOP.SCORE..Frequency.of.Optimal.Codons.	0.302602	0.302602
W1	AROMATICITY.SCORE..Frequency.of.aromatic.amino.acids..Phe..Tyr..Trp.	0.139132	0.139132
W1	econt	0.242336	0.242336
W1	ccont	0.171361	0.171361
W1	hcont	0.23807	0.23807
W1	econtrel	0.254998	0.254998
W1	ccontrel	0.312189	0.312189
W1	hcontrel	0.311452	0.311452
K1	Q1	0.278985	0.278985
K1	E1	0.51162	0.51162
K1	S1	0.131877	0.131877
K1	P1	0.851827	0.851827
K1	V1	0.435905	0.435905
K1	I1	0.490881	0.490881
K1	C1	0.410396	0.410396
K1	Y1	0.60493	0.60493
K1	H1	0.738281	0.738281
K1	R1	0.239409	0.239409
K1	N1	0.206591	0.206591
K1	D1	0.373862	0.373862
K1	T1	0.556633	0.556633
K1	ncont1	0.314056	0.314056
K1	scont1	0.521828	0.521828
K1	mRNA.half.life.short1	0.133948	0.133948
K1	Ribosome.density..rb.kb.1	0.183354	0.183354
K1	ORF.length..nt.1	0.419489	0.419489
K1	mRNA.level1	0.531165	0.531165
K1	GO.0006350_TRANSCRIPTION1	0.203082	0.203082
K1	GO.0006412_PROTEIN_BIOSYNTHESIS1	0.11917	0.11917
K1	GO.0006810_TRANSPORT1	0.514313	0.514313
K1	GO.0008150_BIOLOGICAL_PROCESS1	0.126225	0.126225
K1	GO.0016070_RNA_METABOLISM1	0.10492	0.10492
K1	nuc1	0.50109	0.50109
K1	cyto1	0.372353	0.372353
K1	er1	0.724241	0.724241
K1	MOLECULAR.WEIGHT..in.Daltons.	0.403886	0.403886
K1	PI	0.507539	0.507539
K1	CAI..Codon.Adaptation.Index.	0.467481	0.467481
K1	PROTEIN.LENGTH	0.420001	0.420001
K1	CODON.BIAS	0.326577	0.326577
K1	ALA	0.323614	0.323614
K1	ARG	0.0865216	0.0865216
K1	ASP	0.652736	0.652736
K1	CYS	0.113897	0.113897
K1	GLN	0.297833	0.297833
K1	GLU	0.679965	0.679965
K1	GLY	0.202573	0.202573
K1	HIS	0.140885	0.140885
K1	ILE	0.523611	0.523611
K1	LEU	0.629302	0.629302
K1	LYS	0.908949	0.908949
K1	MET	0.379444	0.379444
K1	PHE	0.107458	0.107458
K1	PRO	0.241061	0.241061
K1	SER	0.214834	0.214834
K1	THR	0.416955	0.416955
K1	TRP	0.239147	0.239147
K1	VAL	0.454712	0.454712
K1	FOP.SCORE..Frequency.of.Optimal.Codons.	0.326911	0.326911
K1	GRAVY.SCORE..Hydropathicity.of.Protein.	0.217243	0.217243
K1	AROMATICITY.SCORE..Frequency.of.aromatic.amino.acids..Phe..Tyr..Trp.	0.719435	0.719435
K1	ccont	0.103057	0.103057
K1	hcont	0.748473	0.748473
K1	econtrel	0.203436	0.203436
K1	ccontrel	0.82547	0.82547
K1	hcontrel	0.842534	0.842534
Q1	E1	0.373895	0.373895
Q1	S1	0.576965	0.576965
Q1	P1	0.301149	0.301149
Q1	I1	0.133978	0.133978
Q1	Y1	0.121914	0.121914
Q1	H1	0.223201	0.223201
Q1	R1	0.121324	0.121324
Q1	N1	0.546847	0.546847
Q1	D1	0.224782	0.224782
Q1	T1	0.379051	0.379051
Q1	ncont1	0.628554	0.628554
Q1	scont1	0.416435	0.416435
Q1	mRNA.half.life.short1	0.156699	0.156699
Q1	Ribosome.occupancy1	0.58622	0.58622
Q1	Ribosome.density..rb.kb.1	0.192643	0.192643
Q1	ORF.length..nt.1	0.123661	0.123661
Q1	mRNA.level1	0.38122	0.38122
Q1	GO.0006350_TRANSCRIPTION1	0.269499	0.269499
Q1	GO.0006412_PROTEIN_BIOSYNTHESIS1	0.0942813	0.0942813
Q1	GO.0006810_TRANSPORT1	0.186317	0.186317
Q1	cyto1	0.373585	0.373585
Q1	MOLECULAR.WEIGHT..in.Daltons.	0.113658	0.113658
Q1	CAI..Codon.Adaptation.Index.	0.11107	0.11107
Q1	PROTEIN.LENGTH	0.128035	0.128035
Q1	CODON.BIAS	0.143336	0.143336
Q1	ALA	0.240261	0.240261
Q1	ARG	0.610555	0.610555
Q1	ASN	0.104718	0.104718
Q1	ASP	0.201026	0.201026
Q1	CYS	0.233731	0.233731
Q1	GLN	0.820844	0.820844
Q1	GLU	0.507696	0.507696
Q1	GLY	0.514504	0.514504
Q1	HIS	0.254639	0.254639
Q1	ILE	0.22025	0.22025
Q1	LEU	0.131048	0.131048
Q1	LYS	0.302241	0.302241
Q1	MET	0.354749	0.354749
Q1	PHE	0.283654	0.283654
Q1	PRO	0.241138	0.241138
Q1	SER	0.498452	0.498452
Q1	THR	0.263057	0.263057
Q1	TYR	0.259956	0.259956
Q1	VAL	0.107847	0.107847
Q1	FOP.SCORE..Frequency.of.Optimal.Codons.	0.14053	0.14053
Q1	GRAVY.SCORE..Hydropathicity.of.Protein.	0.327352	0.327352
Q1	AROMATICITY.SCORE..Frequency.of.aromatic.amino.acids..Phe..Tyr..Trp.	0.100072	0.100072
Q1	econt	0.277792	0.277792
Q1	ccont	0.270835	0.270835
Q1	hcont	0.143267	0.143267
E1	S1	0.173921	0.173921
E1	P1	0.541861	0.541861
E1	C1	0.849519	0.849519
E1	Y1	0.373492	0.373492
E1	H1	0.524713	0.524713
E1	R1	0.269984	0.269984
E1	N1	0.549245	0.549245
E1	D1	0.196312	0.196312
E1	scont1	0.807562	0.807562
E1	Number.of.introns1	0.209241	0.209241
E1	First.intron.length1	0.209356	0.209356
E1	First.intron.GC1	0.208753	0.208753
E1	mRNA.half.life.short1	0.213587	0.213587
E1	Ribosome.occupancy1	0.1939	0.1939
E1	Ribosome.density..rb.kb.1	0.229221	0.229221
E1	ORF.length..nt.1	0.173284	0.173284
E1	mRNA.level1	0.54216	0.54216
E1	GO.0006350_TRANSCRIPTION1	0.123596	0.123596
E1	GO.0006412_PROTEIN_BIOSYNTHESIS1	0.103204	0.103204
E1	GO.0006810_TRANSPORT1	0.234014	0.234014
E1	GO.0008150_BIOLOGICAL_PROCESS1	0.138114	0.138114
E1	GO.0016070_RNA_METABOLISM1	0.256513	0.256513
E1	cyto1	0.621699	0.621699
E1	er1	0.374822	0.374822
E1	MOLECULAR.WEIGHT..in.Daltons.	0.172778	0.172778
E1	CAI..Codon.Adaptation.Index.	0.657785	0.657785
E1	PROTEIN.LENGTH	0.172711	0.172711
E1	CODON.BIAS	0.632075	0.632075
E1	ALA	0.245988	0.245988
E1	ARG	0.233807	0.233807
E1	ASN	0.510022	0.510022
E1	ASP	0.137467	0.137467
E1	CYS	0.672946	0.672946
E1	GLN	0.628033	0.628033
E1	GLU	0.698471	0.698471
E1	GLY	0.127287	0.127287
E1	HIS	0.275129	0.275129
E1	ILE	0.0933121	0.0933121
E1	LYS	0.337786	0.337786
E1	MET	0.622112	0.622112
E1	PHE	0.270217	0.270217
E1	PRO	0.224209	0.224209
E1	SER	0.178419	0.178419
E1	THR	0.196166	0.196166
E1	TRP	0.53418	0.53418
E1	TYR	0.222607	0.222607
E1	VAL	0.10726	0.10726
E1	FOP.SCORE..Frequency.of.Optimal.Codons.	0.632053	0.632053
E1	GRAVY.SCORE..Hydropathicity.of.Protein.	0.443312	0.443312
E1	AROMATICITY.SCORE..Frequency.of.aromatic.amino.acids..Phe..Tyr..Trp.	0.392844	0.392844
E1	ccont	0.341918	0.341918
E1	hcont	0.126922	0.126922
E1	econtrel	0.254412	0.254412
E1	ccontrel	0.352681	0.352681
E1	hcontrel	0.199605	0.199605
S1	P1	0.219925	0.219925
S1	V1	0.221529	0.221529
S1	I1	0.189877	0.189877
S1	C1	0.282358	0.282358
S1	Y1	0.115293	0.115293
S1	H1	0.225464	0.225464
S1	T1	0.353099	0.353099
S1	ncont1	0.52647	0.52647
S1	Number.of.introns1	0.180529	0.180529
S1	First.intron.length1	0.180623	0.180623
S1	First.intron.GC1	0.180028	0.180028
S1	mRNA.half.life.short1	0.206504	0.206504
S1	Ribosome.occupancy1	0.756687	0.756687
S1	Ribosome.density..rb.kb.1	0.529606	0.529606
S1	ORF.length..nt.1	0.137856	0.137856
S1	mRNA.level1	0.254457	0.254457
S1	GO.0006350_TRANSCRIPTION1	0.560741	0.560741
S1	GO.0006412_PROTEIN_BIOSYNTHESIS1	0.460507	0.460507
S1	GO.0016070_RNA_METABOLISM1	0.282717	0.282717
S1	nuc1	0.22752	0.22752
S1	cyto1	0.249177	0.249177
S1	er1	0.469	0.469
S1	MOLECULAR.WEIGHT..in.Daltons.	0.118101	0.118101
S1	PI	0.239837	0.239837
S1	CAI..Codon.Adaptation.Index.	0.46475	0.46475
S1	PROTEIN.LENGTH	0.139103	0.139103
S1	CODON.BIAS	0.396442	0.396442
S1	ALA	0.205653	0.205653
S1	ARG	0.429486	0.429486
S1	ASN	0.274947	0.274947
S1	ASP	0.117549	0.117549
S1	CYS	0.506273	0.506273
S1	GLN	0.240146	0.240146
S1	GLY	0.354402	0.354402
S1	HIS	0.448985	0.448985
S1	ILE	0.264741	0.264741
S1	LEU	0.095381	0.095381
S1	PHE	0.211586	0.211586
S1	PRO	0.432634	0.432634
S1	SER	0.718473	0.718473
S1	THR	0.336502	0.336502
S1	TRP	0.548016	0.548016
S1	TYR	0.230965	0.230965
S1	FOP.SCORE..Frequency.of.Optimal.Codons.	0.396126	0.396126
S1	GRAVY.SCORE..Hydropathicity.of.Protein.	0.319359	0.319359
S1	AROMATICITY.SCORE..Frequency.of.aromatic.amino.acids..Phe..Tyr..Trp.	0.087361	0.087361
S1	ccont	0.492943	0.492943
S1	econtrel	0.280787	0.280787
S1	ccontrel	0.47016	0.47016
S1	hcontrel	0.0951613	0.0951613
P1	V1	0.457728	0.457728
P1	I1	0.396765	0.396765
P1	C1	0.336285	0.336285
P1	Y1	0.654362	0.654362
P1	H1	0.790185	0.790185
P1	R1	0.128035	0.128035
P1	N1	0.0982242	0.0982242
P1	D1	0.456247	0.456247
P1	T1	0.360984	0.360984
P1	ncont1	0.193903	0.193903
P1	scont1	0.467177	0.467177
P1	mRNA.half.life.short1	0.086322	0.086322
P1	Ribosome.occupancy1	0.136002	0.136002
P1	ORF.length..nt.1	0.105966	0.105966
P1	mRNA.level1	0.589576	0.589576
P1	GO.0006350_TRANSCRIPTION1	0.111638	0.111638
P1	GO.0006810_TRANSPORT1	0.393016	0.393016
P1	GO.0016070_RNA_METABOLISM1	0.162178	0.162178
P1	nuc1	0.564266	0.564266
P1	cyto1	0.249496	0.249496
P1	er1	0.519484	0.519484
P1	MOLECULAR.WEIGHT..in.Daltons.	0.0919962	0.0919962
P1	PI	0.336378	0.336378
P1	CAI..Codon.Adaptation.Index.	0.461412	0.461412
P1	PROTEIN.LENGTH	0.108619	0.108619
P1	CODON.BIAS	0.302209	0.302209
P1	ALA	0.108544	0.108544
P1	ASN	0.147523	0.147523
P1	ASP	0.45625	0.45625
P1	CYS	0.216118	0.216118
P1	GLN	0.428961	0.428961
P1	GLU	0.560029	0.560029
P1	GLY	0.31905	0.31905
P1	HIS	0.43872	0.43872
P1	ILE	0.288629	0.288629
P1	LEU	0.360499	0.360499
P1	LYS	0.681766	0.681766
P1	MET	0.438504	0.438504
P1	PHE	0.19836	0.19836
P1	PRO	0.5514	0.5514
P1	THR	0.142025	0.142025
P1	TRP	0.314701	0.314701
P1	TYR	0.249589	0.249589
P1	VAL	0.196096	0.196096
P1	FOP.SCORE..Frequency.of.Optimal.Codons.	0.302178	0.302178
P1	GRAVY.SCORE..Hydropathicity.of.Protein.	0.0953338	0.0953338
P1	AROMATICITY.SCORE..Frequency.of.aromatic.amino.acids..Phe..Tyr..Trp.	0.6103	0.6103
P1	ccont	0.394783	0.394783
P1	hcont	0.486814	0.486814
P1	ccontrel	0.815042	0.815042
P1	hcontrel	0.625307	0.625307
V1	I1	0.733327	0.733327
V1	Y1	0.439109	0.439109
V1	H1	0.348099	0.348099
V1	R1	0.410641	0.410641
V1	N1	0.33534	0.33534
V1	T1	0.50431	0.50431
V1	ncont1	0.16968	0.16968
V1	scont1	0.106246	0.106246
V1	mRNA.half.life.short1	0.15359	0.15359
V1	Ribosome.occupancy1	0.243671	0.243671
V1	Ribosome.density..rb.kb.1	0.352995	0.352995
V1	ORF.length..nt.1	0.41562	0.41562
V1	GO.0006350_TRANSCRIPTION1	0.192473	0.192473
V1	GO.0006412_PROTEIN_BIOSYNTHESIS1	0.114051	0.114051
V1	GO.0006810_TRANSPORT1	0.3672	0.3672
V1	GO.0008150_BIOLOGICAL_PROCESS1	0.183661	0.183661
V1	GO.0016070_RNA_METABOLISM1	0.165652	0.165652
V1	nuc1	0.542699	0.542699
V1	er1	0.517377	0.517377
V1	MOLECULAR.WEIGHT..in.Daltons.	0.423323	0.423323
V1	PI	0.175446	0.175446
V1	PROTEIN.LENGTH	0.416921	0.416921
V1	CODON.BIAS	0.156863	0.156863
V1	ALA	0.399996	0.399996
V1	ASN	0.444894	0.444894
V1	ASP	0.47198	0.47198
V1	CYS	0.144823	0.144823
V1	GLU	0.305738	0.305738
V1	HIS	0.105633	0.105633
V1	ILE	0.588605	0.588605
V1	LEU	0.537775	0.537775
V1	LYS	0.525372	0.525372
V1	PHE	0.228129	0.228129
V1	SER	0.108434	0.108434
V1	THR	0.444972	0.444972
V1	TRP	0.131381	0.131381
V1	TYR	0.209358	0.209358
V1	VAL	0.602329	0.602329
V1	FOP.SCORE..Frequency.of.Optimal.Codons.	0.152391	0.152391
V1	GRAVY.SCORE..Hydropathicity.of.Protein.	0.506658	0.506658
V1	AROMATICITY.SCORE..Frequency.of.aromatic.amino.acids..Phe..Tyr..Trp.	0.476961	0.476961
V1	econt	0.395732	0.395732
V1	ccont	0.115958	0.115958
V1	hcont	0.563879	0.563879
V1	econtrel	0.147905	0.147905
V1	ccontrel	0.650658	0.650658
V1	hcontrel	0.42898	0.42898
I1	C1	0.0938872	0.0938872
I1	Y1	0.559928	0.559928
I1	H1	0.189202	0.189202
I1	R1	0.459975	0.459975
I1	N1	0.441908	0.441908
I1	D1	0.209264	0.209264
I1	T1	0.786162	0.786162
I1	ncont1	0.27652	0.27652
I1	scont1	0.19527	0.19527
I1	Number.of.introns1	0.0931255	0.0931255
I1	First.intron.length1	0.0935464	0.0935464
I1	First.intron.GC1	0.0921743	0.0921743
I1	mRNA.half.life.short1	0.385441	0.385441
I1	Ribosome.density..rb.kb.1	0.728222	0.728222
I1	ORF.length..nt.1	0.476207	0.476207
I1	mRNA.level1	0.290048	0.290048
I1	GO.0006350_TRANSCRIPTION1	0.511169	0.511169
I1	GO.0006412_PROTEIN_BIOSYNTHESIS1	0.377594	0.377594
I1	GO.0006810_TRANSPORT1	0.53662	0.53662
I1	GO.0008150_BIOLOGICAL_PROCESS1	0.205917	0.205917
I1	nuc1	0.36368	0.36368
I1	cyto1	0.106592	0.106592
I1	er1	0.283958	0.283958
I1	MOLECULAR.WEIGHT..in.Daltons.	0.472591	0.472591
I1	PI	0.392068	0.392068
I1	CAI..Codon.Adaptation.Index.	0.412234	0.412234
I1	PROTEIN.LENGTH	0.474872	0.474872
I1	CODON.BIAS	0.514045	0.514045
I1	ALA	0.400595	0.400595
I1	ASN	0.517845	0.517845
I1	ASP	0.592775	0.592775
I1	CYS	0.331202	0.331202
I1	GLU	0.166279	0.166279
I1	GLY	0.239981	0.239981
I1	HIS	0.249802	0.249802
I1	ILE	0.861203	0.861203
I1	LEU	0.728443	0.728443
I1	LYS	0.574699	0.574699
I1	MET	0.107417	0.107417
I1	PHE	0.118786	0.118786
I1	PRO	0.11582	0.11582
I1	SER	0.32095	0.32095
I1	THR	0.633803	0.633803
I1	TRP	0.155924	0.155924
I1	TYR	0.162506	0.162506
I1	VAL	0.535173	0.535173
I1	FOP.SCORE..Frequency.of.Optimal.Codons.	0.508934	0.508934
I1	GRAVY.SCORE..Hydropathicity.of.Protein.	0.688838	0.688838
I1	AROMATICITY.SCORE..Frequency.of.aromatic.amino.acids..Phe..Tyr..Trp.	0.634982	0.634982
I1	ccont	0.214631	0.214631
I1	hcont	0.71465	0.71465
I1	econtrel	0.315724	0.315724
I1	ccontrel	0.488245	0.488245
I1	hcontrel	0.590708	0.590708
C1	Y1	0.341161	0.341161
C1	H1	0.382822	0.382822
C1	R1	0.14899	0.14899
C1	N1	0.407358	0.407358
C1	ncont1	0.113052	0.113052
C1	scont1	0.760671	0.760671
C1	Number.of.introns1	0.207627	0.207627
C1	First.intron.length1	0.207838	0.207838
C1	First.intron.GC1	0.207703	0.207703
C1	mRNA.half.life.short1	0.270809	0.270809
C1	Ribosome.occupancy1	0.211994	0.211994
C1	Ribosome.density..rb.kb.1	0.253333	0.253333
C1	ORF.length..nt.1	0.116389	0.116389
C1	mRNA.level1	0.406046	0.406046
C1	GO.0006810_TRANSPORT1	0.218394	0.218394
C1	GO.0008150_BIOLOGICAL_PROCESS1	0.297068	0.297068
C1	GO.0016070_RNA_METABOLISM1	0.22418	0.22418
C1	cyto1	0.496999	0.496999
C1	er1	0.485573	0.485573
C1	MOLECULAR.WEIGHT..in.Daltons.	0.109623	0.109623
C1	CAI..Codon.Adaptation.Index.	0.639919	0.639919
C1	PROTEIN.LENGTH	0.117161	0.117161
C1	CODON.BIAS	0.656577	0.656577
C1	ALA	0.216021	0.216021
C1	ARG	0.141915	0.141915
C1	ASN	0.371914	0.371914
C1	CYS	0.803041	0.803041
C1	GLN	0.309179	0.309179
C1	GLU	0.605639	0.605639
C1	GLY	0.121714	0.121714
C1	HIS	0.148348	0.148348
C1	ILE	0.0852645	0.0852645
C1	LYS	0.298555	0.298555
C1	MET	0.480031	0.480031
C1	PHE	0.253881	0.253881
C1	PRO	0.104068	0.104068
C1	SER	0.210742	0.210742
C1	THR	0.15724	0.15724
C1	TRP	0.477872	0.477872
C1	TYR	0.187659	0.187659
C1	FOP.SCORE..Frequency.of.Optimal.Codons.	0.657306	0.657306
C1	GRAVY.SCORE..Hydropathicity.of.Protein.	0.486636	0.486636
C1	AROMATICITY.SCORE..Frequency.of.aromatic.amino.acids..Phe..Tyr..Trp.	0.401436	0.401436
C1	ccont	0.234905	0.234905
C1	hcont	0.153758	0.153758
C1	econtrel	0.280901	0.280901
C1	ccontrel	0.31363	0.31363
C1	hcontrel	0.211932	0.211932
Y1	H1	0.552299	0.552299
Y1	R1	0.256867	0.256867
Y1	N1	0.307412	0.307412
Y1	D1	0.574838	0.574838
Y1	T1	0.408769	0.408769
Y1	ncont1	0.15599	0.15599
Y1	scont1	0.416932	0.416932
Y1	mRNA.half.life.short1	0.0877961	0.0877961
Y1	Ribosome.density..rb.kb.1	0.367676	0.367676
Y1	mRNA.level1	0.120343	0.120343
Y1	GO.0006350_TRANSCRIPTION1	0.194395	0.194395
Y1	GO.0006412_PROTEIN_BIOSYNTHESIS1	0.452917	0.452917
Y1	GO.0006810_TRANSPORT1	0.498156	0.498156
Y1	GO.0008150_BIOLOGICAL_PROCESS1	0.152686	0.152686
Y1	GO.0016070_RNA_METABOLISM1	0.160461	0.160461
Y1	nuc1	0.529769	0.529769
Y1	cyto1	0.263573	0.263573
Y1	er1	0.204214	0.204214
Y1	CAI..Codon.Adaptation.Index.	0.0831276	0.0831276
Y1	ARG	0.173284	0.173284
Y1	ASN	0.154605	0.154605
Y1	ASP	0.405129	0.405129
Y1	CYS	0.217074	0.217074
Y1	GLN	0.128518	0.128518
Y1	GLU	0.340187	0.340187
Y1	GLY	0.325883	0.325883
Y1	HIS	0.308076	0.308076
Y1	ILE	0.374752	0.374752
Y1	LEU	0.30884	0.30884
Y1	LYS	0.505384	0.505384
Y1	MET	0.284862	0.284862
Y1	PHE	0.276187	0.276187
Y1	PRO	0.343415	0.343415
Y1	SER	0.138643	0.138643
Y1	THR	0.190356	0.190356
Y1	TYR	0.401179	0.401179
Y1	VAL	0.0969834	0.0969834
Y1	AROMATICITY.SCORE..Frequency.of.aromatic.amino.acids..Phe..Tyr..Trp.	0.875584	0.875584
Y1	econt	0.168745	0.168745
Y1	ccont	0.271813	0.271813
Y1	hcont	0.450184	0.450184
Y1	econtrel	0.341945	0.341945
Y1	ccontrel	0.503766	0.503766
Y1	hcontrel	0.53587	0.53587
H1	N1	0.173289	0.173289
H1	D1	0.45033	0.45033
H1	T1	0.264588	0.264588
H1	ncont1	0.174747	0.174747
H1	scont1	0.351722	0.351722
H1	Number.of.introns1	0.114339	0.114339
H1	First.intron.length1	0.112966	0.112966
H1	First.intron.GC1	0.113144	0.113144
H1	Ribosome.density..rb.kb.1	0.13634	0.13634
H1	ORF.length..nt.1	0.117673	0.117673
H1	mRNA.level1	0.680767	0.680767
H1	GO.0006350_TRANSCRIPTION1	0.0870766	0.0870766
H1	GO.0006412_PROTEIN_BIOSYNTHESIS1	0.11534	0.11534
H1	GO.0006810_TRANSPORT1	0.345651	0.345651
H1	nuc1	0.43306	0.43306
H1	cyto1	0.330411	0.330411
H1	er1	0.601357	0.601357
H1	MOLECULAR.WEIGHT..in.Daltons.	0.0903228	0.0903228
H1	PI	0.0932362	0.0932362
H1	CAI..Codon.Adaptation.Index.	0.551013	0.551013
H1	PROTEIN.LENGTH	0.11692	0.11692
H1	CODON.BIAS	0.413365	0.413365
H1	ASN	0.112638	0.112638
H1	ASP	0.395586	0.395586
H1	CYS	0.218736	0.218736
H1	GLN	0.35608	0.35608
H1	GLU	0.573557	0.573557
H1	GLY	0.134619	0.134619
H1	HIS	0.485625	0.485625
H1	ILE	0.118568	0.118568
H1	LEU	0.175533	0.175533
H1	LYS	0.581958	0.581958
H1	MET	0.34996	0.34996
H1	PHE	0.0950475	0.0950475
H1	PRO	0.443258	0.443258
H1	THR	0.0854447	0.0854447
H1	TRP	0.231364	0.231364
H1	TYR	0.17422	0.17422
H1	VAL	0.173375	0.173375
H1	FOP.SCORE..Frequency.of.Optimal.Codons.	0.40738	0.40738
H1	GRAVY.SCORE..Hydropathicity.of.Protein.	0.0971478	0.0971478
H1	AROMATICITY.SCORE..Frequency.of.aromatic.amino.acids..Phe..Tyr..Trp.	0.436375	0.436375
H1	econt	0.218912	0.218912
H1	ccont	0.272706	0.272706
H1	hcont	0.320109	0.320109
H1	econtrel	0.132917	0.132917
H1	ccontrel	0.636808	0.636808
H1	hcontrel	0.401787	0.401787
R1	N1	0.372373	0.372373
R1	T1	0.295642	0.295642
R1	ncont1	0.480269	0.480269
R1	scont1	0.378498	0.378498
R1	mRNA.half.life.short1	0.08273	0.08273
R1	Ribosome.density..rb.kb.1	0.28137	0.28137
R1	ORF.length..nt.1	0.613868	0.613868
R1	GO.0006350_TRANSCRIPTION1	0.443944	0.443944
R1	GO.0006810_TRANSPORT1	0.551493	0.551493
R1	GO.0008150_BIOLOGICAL_PROCESS1	0.103737	0.103737
R1	nuc1	0.562927	0.562927
R1	cyto1	0.293488	0.293488
R1	er1	0.30614	0.30614
R1	MOLECULAR.WEIGHT..in.Daltons.	0.609111	0.609111
R1	PI	0.10746	0.10746
R1	CAI..Codon.Adaptation.Index.	0.131092	0.131092
R1	PROTEIN.LENGTH	0.61058	0.61058
R1	CODON.BIAS	0.207324	0.207324
R1	ALA	0.661143	0.661143
R1	ARG	0.190799	0.190799
R1	ASN	0.716275	0.716275
R1	ASP	0.44132	0.44132
R1	CYS	0.340269	0.340269
R1	GLN	0.412532	0.412532
R1	GLU	0.244605	0.244605
R1	HIS	0.375384	0.375384
R1	ILE	0.522326	0.522326
R1	LEU	0.547425	0.547425
R1	LYS	0.463442	0.463442
R1	MET	0.632613	0.632613
R1	PHE	0.499797	0.499797
R1	PRO	0.278786	0.278786
R1	SER	0.450258	0.450258
R1	THR	0.464777	0.464777
R1	TRP	0.332008	0.332008
R1	TYR	0.407811	0.407811
R1	VAL	0.573099	0.573099
R1	FOP.SCORE..Frequency.of.Optimal.Codons.	0.199637	0.199637
R1	GRAVY.SCORE..Hydropathicity.of.Protein.	0.535757	0.535757
R1	AROMATICITY.SCORE..Frequency.of.aromatic.amino.acids..Phe..Tyr..Trp.	0.267221	0.267221
R1	econt	0.312984	0.312984
R1	ccont	0.39403	0.39403
R1	hcont	0.542609	0.542609
R1	econtrel	0.129685	0.129685
R1	ccontrel	0.406353	0.406353
R1	hcontrel	0.404281	0.404281
N1	D1	0.265682	0.265682
N1	T1	0.169668	0.169668
N1	ncont1	0.254979	0.254979
N1	scont1	0.42581	0.42581
N1	Number.of.introns1	0.186679	0.186679
N1	First.intron.length1	0.186361	0.186361
N1	First.intron.GC1	0.186047	0.186047
N1	Ribosome.occupancy1	0.236019	0.236019
N1	Ribosome.density..rb.kb.1	0.434295	0.434295
N1	ORF.length..nt.1	0.102618	0.102618
N1	mRNA.level1	0.632298	0.632298
N1	GO.0006412_PROTEIN_BIOSYNTHESIS1	0.340071	0.340071
N1	GO.0006810_TRANSPORT1	0.405427	0.405427
N1	GO.0008150_BIOLOGICAL_PROCESS1	0.200482	0.200482
N1	GO.0016070_RNA_METABOLISM1	0.122255	0.122255
N1	nuc1	0.290466	0.290466
N1	cyto1	0.450114	0.450114
N1	er1	0.236484	0.236484
N1	MOLECULAR.WEIGHT..in.Daltons.	0.0987977	0.0987977
N1	CAI..Codon.Adaptation.Index.	0.642144	0.642144
N1	PROTEIN.LENGTH	0.101915	0.101915
N1	CODON.BIAS	0.72288	0.72288
N1	ARG	0.412457	0.412457
N1	ASN	0.600173	0.600173
N1	ASP	0.165169	0.165169
N1	CYS	0.237844	0.237844
N1	GLN	0.643523	0.643523
N1	GLU	0.435011	0.435011
N1	GLY	0.415699	0.415699
N1	ILE	0.304811	0.304811
N1	LEU	0.184833	0.184833
N1	LYS	0.101656	0.101656
N1	MET	0.398778	0.398778
N1	THR	0.190198	0.190198
N1	TRP	0.265386	0.265386
N1	TYR	0.11179	0.11179
N1	VAL	0.152278	0.152278
N1	FOP.SCORE..Frequency.of.Optimal.Codons.	0.71939	0.71939
N1	GRAVY.SCORE..Hydropathicity.of.Protein.	0.181127	0.181127
N1	AROMATICITY.SCORE..Frequency.of.aromatic.amino.acids..Phe..Tyr..Trp.	0.204205	0.204205
N1	econt	0.180312	0.180312
N1	hcont	0.121683	0.121683
D1	ncont1	0.269674	0.269674
D1	scont1	0.147575	0.147575
D1	Number.of.introns1	0.165461	0.165461
D1	First.intron.length1	0.16629	0.16629
D1	First.intron.GC1	0.164174	0.164174
D1	Ribosome.occupancy1	0.206536	0.206536
D1	Ribosome.density..rb.kb.1	0.226951	0.226951
D1	ORF.length..nt.1	0.1743	0.1743
D1	GO.0006412_PROTEIN_BIOSYNTHESIS1	0.422203	0.422203
D1	GO.0006810_TRANSPORT1	0.324072	0.324072
D1	GO.0008150_BIOLOGICAL_PROCESS1	0.122818	0.122818
D1	GO.0016070_RNA_METABOLISM1	0.130311	0.130311
D1	cyto1	0.395377	0.395377
D1	MOLECULAR.WEIGHT..in.Daltons.	0.187788	0.187788
D1	PI	0.109577	0.109577
D1	PROTEIN.LENGTH	0.172403	0.172403
D1	CODON.BIAS	0.177702	0.177702
D1	ALA	0.306175	0.306175
D1	ARG	0.290201	0.290201
D1	ASN	0.0918427	0.0918427
D1	ASP	0.305462	0.305462
D1	CYS	0.144153	0.144153
D1	GLY	0.525969	0.525969
D1	HIS	0.534915	0.534915
D1	LYS	0.183927	0.183927
D1	MET	0.259872	0.259872
D1	PHE	0.54294	0.54294
D1	PRO	0.55268	0.55268
D1	SER	0.218173	0.218173
D1	THR	0.125905	0.125905
D1	TYR	0.510235	0.510235
D1	VAL	0.185829	0.185829
D1	FOP.SCORE..Frequency.of.Optimal.Codons.	0.185734	0.185734
D1	GRAVY.SCORE..Hydropathicity.of.Protein.	0.308472	0.308472
D1	AROMATICITY.SCORE..Frequency.of.aromatic.amino.acids..Phe..Tyr..Trp.	0.52636	0.52636
D1	econt	0.37278	0.37278
D1	ccont	0.507845	0.507845
D1	hcont	0.163118	0.163118
D1	econtrel	0.273841	0.273841
D1	ccontrel	0.311363	0.311363
D1	hcontrel	0.320152	0.320152
T1	ncont1	0.478679	0.478679
T1	scont1	0.221707	0.221707
T1	Number.of.introns1	0.101364	0.101364
T1	First.intron.length1	0.101602	0.101602
T1	First.intron.GC1	0.10069	0.10069
T1	mRNA.half.life.short1	0.424318	0.424318
T1	Ribosome.occupancy1	0.478834	0.478834
T1	Ribosome.density..rb.kb.1	0.682258	0.682258
T1	ORF.length..nt.1	0.607816	0.607816
T1	mRNA.level1	0.100612	0.100612
T1	GO.0006350_TRANSCRIPTION1	0.592784	0.592784
T1	GO.0006412_PROTEIN_BIOSYNTHESIS1	0.109674	0.109674
T1	GO.0006810_TRANSPORT1	0.465883	0.465883
T1	GO.0016070_RNA_METABOLISM1	0.263406	0.263406
T1	nuc1	0.242179	0.242179
T1	cyto1	0.151502	0.151502
T1	er1	0.402592	0.402592
T1	MOLECULAR.WEIGHT..in.Daltons.	0.59909	0.59909
T1	PI	0.490494	0.490494
T1	CAI..Codon.Adaptation.Index.	0.29793	0.29793
T1	PROTEIN.LENGTH	0.608544	0.608544
T1	CODON.BIAS	0.368855	0.368855
T1	ALA	0.488861	0.488861
T1	ARG	0.336337	0.336337
T1	ASN	0.474342	0.474342
T1	ASP	0.679212	0.679212
T1	CYS	0.449002	0.449002
T1	GLN	0.109573	0.109573
T1	GLU	0.321437	0.321437
T1	HIS	0.388585	0.388585
T1	ILE	0.842978	0.842978
T1	LEU	0.774023	0.774023
T1	LYS	0.684621	0.684621
T1	MET	0.131595	0.131595
T1	PHE	0.240315	0.240315
T1	PRO	0.284414	0.284414
T1	SER	0.519358	0.519358
T1	THR	0.849011	0.849011
T1	TRP	0.165082	0.165082
T1	TYR	0.357251	0.357251
T1	VAL	0.637973	0.637973
T1	FOP.SCORE..Frequency.of.Optimal.Codons.	0.367777	0.367777
T1	GRAVY.SCORE..Hydropathicity.of.Protein.	0.697267	0.697267
T1	AROMATICITY.SCORE..Frequency.of.aromatic.amino.acids..Phe..Tyr..Trp.	0.541594	0.541594
T1	econt	0.114966	0.114966
T1	ccont	0.429376	0.429376
T1	hcont	0.759537	0.759537
T1	econtrel	0.241993	0.241993
T1	ccontrel	0.383545	0.383545
T1	hcontrel	0.644251	0.644251
ncont1	mRNA.half.life.short1	0.174971	0.174971
ncont1	Ribosome.occupancy1	0.686796	0.686796
ncont1	Ribosome.density..rb.kb.1	0.148329	0.148329
ncont1	ORF.length..nt.1	0.527835	0.527835
ncont1	mRNA.level1	0.32296	0.32296
ncont1	GO.0006350_TRANSCRIPTION1	0.498486	0.498486
ncont1	GO.0006412_PROTEIN_BIOSYNTHESIS1	0.250871	0.250871
ncont1	GO.0006810_TRANSPORT1	0.428243	0.428243
ncont1	nuc1	0.368529	0.368529
ncont1	cyto1	0.100425	0.100425
ncont1	er1	0.262304	0.262304
ncont1	MOLECULAR.WEIGHT..in.Daltons.	0.505582	0.505582
ncont1	PI	0.228103	0.228103
ncont1	CAI..Codon.Adaptation.Index.	0.095742	0.095742
ncont1	PROTEIN.LENGTH	0.526373	0.526373
ncont1	CODON.BIAS	0.0934719	0.0934719
ncont1	ALA	0.782669	0.782669
ncont1	ARG	0.30722	0.30722
ncont1	ASN	0.401554	0.401554
ncont1	ASP	0.318751	0.318751
ncont1	CYS	0.420494	0.420494
ncont1	GLN	0.205909	0.205909
ncont1	GLU	0.517211	0.517211
ncont1	GLY	0.462325	0.462325
ncont1	HIS	0.439847	0.439847
ncont1	ILE	0.470853	0.470853
ncont1	LEU	0.312212	0.312212
ncont1	LYS	0.462741	0.462741
ncont1	MET	0.262165	0.262165
ncont1	PHE	0.576522	0.576522
ncont1	PRO	0.383106	0.383106
ncont1	SER	0.813081	0.813081
ncont1	THR	0.603929	0.603929
ncont1	TRP	0.289729	0.289729
ncont1	TYR	0.498649	0.498649
ncont1	VAL	0.469024	0.469024
ncont1	FOP.SCORE..Frequency.of.Optimal.Codons.	0.0976115	0.0976115
ncont1	GRAVY.SCORE..Hydropathicity.of.Protein.	0.637426	0.637426
ncont1	AROMATICITY.SCORE..Frequency.of.aromatic.amino.acids..Phe..Tyr..Trp.	0.128012	0.128012
ncont1	econt	0.57072	0.57072
ncont1	ccont	0.58578	0.58578
ncont1	hcont	0.37637	0.37637
ncont1	econtrel	0.257473	0.257473
ncont1	ccontrel	0.136857	0.136857
ncont1	hcontrel	0.205403	0.205403
scont1	Number.of.introns1	0.121767	0.121767
scont1	First.intron.length1	0.122096	0.122096
scont1	First.intron.GC1	0.121323	0.121323
scont1	mRNA.half.life.short1	0.478097	0.478097
scont1	Ribosome.density..rb.kb.1	0.121863	0.121863
scont1	ORF.length..nt.1	0.122546	0.122546
scont1	mRNA.level1	0.228683	0.228683
scont1	GO.0006412_PROTEIN_BIOSYNTHESIS1	0.271667	0.271667
scont1	GO.0006810_TRANSPORT1	0.204267	0.204267
scont1	GO.0016070_RNA_METABOLISM1	0.115348	0.115348
scont1	nuc1	0.09572	0.09572
scont1	cyto1	0.689972	0.689972
scont1	er1	0.295076	0.295076
scont1	MOLECULAR.WEIGHT..in.Daltons.	0.117735	0.117735
scont1	PI	0.299533	0.299533
scont1	CAI..Codon.Adaptation.Index.	0.371982	0.371982
scont1	PROTEIN.LENGTH	0.120254	0.120254
scont1	CODON.BIAS	0.375192	0.375192
scont1	ALA	0.236541	0.236541
scont1	ARG	0.334593	0.334593
scont1	ASN	0.44318	0.44318
scont1	ASP	0.209205	0.209205
scont1	CYS	0.531097	0.531097
scont1	GLN	0.620093	0.620093
scont1	GLU	0.495283	0.495283
scont1	HIS	0.103906	0.103906
scont1	ILE	0.162343	0.162343
scont1	LEU	0.181901	0.181901
scont1	LYS	0.358823	0.358823
scont1	MET	0.851209	0.851209
scont1	PHE	0.369887	0.369887
scont1	PRO	0.12625	0.12625
scont1	TRP	0.442977	0.442977
scont1	TYR	0.216624	0.216624
scont1	VAL	0.0922707	0.0922707
scont1	FOP.SCORE..Frequency.of.Optimal.Codons.	0.376068	0.376068
scont1	GRAVY.SCORE..Hydropathicity.of.Protein.	0.214597	0.214597
scont1	AROMATICITY.SCORE..Frequency.of.aromatic.amino.acids..Phe..Tyr..Trp.	0.516328	0.516328
scont1	econt	0.298597	0.298597
scont1	ccont	0.229941	0.229941
scont1	hcont	0.292638	0.292638
scont1	econtrel	0.586043	0.586043
scont1	ccontrel	0.2574	0.2574
scont1	hcontrel	0.363897	0.363897
Number.of.introns1	First.intron.length1	0.999947	0.999947
Number.of.introns1	First.intron.GC1	0.999947	0.999947
Number.of.introns1	mRNA.half.life.short1	0.0936032	0.0936032
Number.of.introns1	Ribosome.occupancy1	0.122111	0.122111
Number.of.introns1	Ribosome.density..rb.kb.1	0.126006	0.126006
Number.of.introns1	mRNA.level1	0.180004	0.180004
Number.of.introns1	GO.0006350_TRANSCRIPTION1	0.111011	0.111011
Number.of.introns1	GO.0016070_RNA_METABOLISM1	0.16415	0.16415
Number.of.introns1	er1	0.119153	0.119153
Number.of.introns1	PI	0.161582	0.161582
Number.of.introns1	CAI..Codon.Adaptation.Index.	0.192013	0.192013
Number.of.introns1	CODON.BIAS	0.209769	0.209769
Number.of.introns1	ASN	0.126693	0.126693
Number.of.introns1	CYS	0.209924	0.209924
Number.of.introns1	GLU	0.127276	0.127276
Number.of.introns1	GLY	0.128968	0.128968
Number.of.introns1	HIS	0.105195	0.105195
Number.of.introns1	ILE	0.0828324	0.0828324
Number.of.introns1	MET	0.0924517	0.0924517
Number.of.introns1	PHE	0.0835142	0.0835142
Number.of.introns1	SER	0.12684	0.12684
Number.of.introns1	TRP	0.0995884	0.0995884
Number.of.introns1	FOP.SCORE..Frequency.of.Optimal.Codons.	0.207546	0.207546
Number.of.introns1	GRAVY.SCORE..Hydropathicity.of.Protein.	0.111678	0.111678
Number.of.introns1	econt	0.171777	0.171777
Number.of.introns1	ccont	0.095161	0.095161
Number.of.introns1	econtrel	0.14333	0.14333
Number.of.introns1	tfcode2	0.00259093	0.00259093
First.intron.length1	First.intron.GC1	0.999909	0.999909
First.intron.length1	mRNA.half.life.short1	0.0942396	0.0942396
First.intron.length1	Ribosome.occupancy1	0.122815	0.122815
First.intron.length1	Ribosome.density..rb.kb.1	0.126607	0.126607
First.intron.length1	mRNA.level1	0.180365	0.180365
First.intron.length1	GO.0006350_TRANSCRIPTION1	0.110398	0.110398
First.intron.length1	GO.0016070_RNA_METABOLISM1	0.166962	0.166962
First.intron.length1	er1	0.119147	0.119147
First.intron.length1	PI	0.162074	0.162074
First.intron.length1	CAI..Codon.Adaptation.Index.	0.192179	0.192179
First.intron.length1	CODON.BIAS	0.209919	0.209919
First.intron.length1	ASN	0.125878	0.125878
First.intron.length1	CYS	0.210108	0.210108
First.intron.length1	GLU	0.127298	0.127298
First.intron.length1	GLY	0.129279	0.129279
First.intron.length1	HIS	0.103978	0.103978
First.intron.length1	ILE	0.0829088	0.0829088
First.intron.length1	MET	0.091947	0.091947
First.intron.length1	PHE	0.0826687	0.0826687
First.intron.length1	SER	0.126708	0.126708
First.intron.length1	TRP	0.0995831	0.0995831
First.intron.length1	FOP.SCORE..Frequency.of.Optimal.Codons.	0.207706	0.207706
First.intron.length1	GRAVY.SCORE..Hydropathicity.of.Protein.	0.11161	0.11161
First.intron.length1	econt	0.172092	0.172092
First.intron.length1	ccont	0.0955026	0.0955026
First.intron.length1	econtrel	0.14391	0.14391
First.intron.length1	tfcode2	0.00258391	0.00258391
First.intron.GC1	mRNA.half.life.short1	0.0929568	0.0929568
First.intron.GC1	Ribosome.occupancy1	0.122577	0.122577
First.intron.GC1	Ribosome.density..rb.kb.1	0.126558	0.126558
First.intron.GC1	mRNA.level1	0.18016	0.18016
First.intron.GC1	GO.0006350_TRANSCRIPTION1	0.109405	0.109405
First.intron.GC1	GO.0016070_RNA_METABOLISM1	0.165966	0.165966
First.intron.GC1	er1	0.119147	0.119147
First.intron.GC1	PI	0.161875	0.161875
First.intron.GC1	CAI..Codon.Adaptation.Index.	0.192378	0.192378
First.intron.GC1	CODON.BIAS	0.209887	0.209887
First.intron.GC1	ASN	0.125449	0.125449
First.intron.GC1	CYS	0.209612	0.209612
First.intron.GC1	GLU	0.127275	0.127275
First.intron.GC1	GLY	0.12869	0.12869
First.intron.GC1	HIS	0.103857	0.103857
First.intron.GC1	ILE	0.0816701	0.0816701
First.intron.GC1	MET	0.0908781	0.0908781
First.intron.GC1	PHE	0.0815755	0.0815755
First.intron.GC1	SER	0.126359	0.126359
First.intron.GC1	TRP	0.0995831	0.0995831
First.intron.GC1	FOP.SCORE..Frequency.of.Optimal.Codons.	0.207791	0.207791
First.intron.GC1	GRAVY.SCORE..Hydropathicity.of.Protein.	0.109963	0.109963
First.intron.GC1	econt	0.170861	0.170861
First.intron.GC1	ccont	0.0944322	0.0944322
First.intron.GC1	econtrel	0.14196	0.14196
First.intron.GC1	tfcode2	0.00259852	0.00259852
mRNA.half.life.short1	Ribosome.occupancy1	0.122508	0.122508
mRNA.half.life.short1	Ribosome.density..rb.kb.1	0.617733	0.617733
mRNA.half.life.short1	ORF.length..nt.1	0.33135	0.33135
mRNA.half.life.short1	mRNA.level1	0.311276	0.311276
mRNA.half.life.short1	GO.0006350_TRANSCRIPTION1	0.530093	0.530093
mRNA.half.life.short1	GO.0006412_PROTEIN_BIOSYNTHESIS1	0.468121	0.468121
mRNA.half.life.short1	GO.0006810_TRANSPORT1	0.303929	0.303929
mRNA.half.life.short1	GO.0008150_BIOLOGICAL_PROCESS1	0.173273	0.173273
mRNA.half.life.short1	nuc1	0.388429	0.388429
mRNA.half.life.short1	cyto1	0.597351	0.597351
mRNA.half.life.short1	er1	0.119929	0.119929
mRNA.half.life.short1	MOLECULAR.WEIGHT..in.Daltons.	0.348592	0.348592
mRNA.half.life.short1	PI	0.355966	0.355966
mRNA.half.life.short1	CAI..Codon.Adaptation.Index.	0.32273	0.32273
mRNA.half.life.short1	PROTEIN.LENGTH	0.33135	0.33135
mRNA.half.life.short1	CODON.BIAS	0.297549	0.297549
mRNA.half.life.short1	ARG	0.586604	0.586604
mRNA.half.life.short1	ASN	0.197097	0.197097
mRNA.half.life.short1	ASP	0.508707	0.508707
mRNA.half.life.short1	CYS	0.108181	0.108181
mRNA.half.life.short1	GLN	0.153914	0.153914
mRNA.half.life.short1	GLU	0.188169	0.188169
mRNA.half.life.short1	GLY	0.250711	0.250711
mRNA.half.life.short1	HIS	0.483309	0.483309
mRNA.half.life.short1	ILE	0.467054	0.467054
mRNA.half.life.short1	LEU	0.507933	0.507933
mRNA.half.life.short1	LYS	0.264167	0.264167
mRNA.half.life.short1	MET	0.316358	0.316358
mRNA.half.life.short1	PHE	0.110144	0.110144
mRNA.half.life.short1	PRO	0.493801	0.493801
mRNA.half.life.short1	SER	0.119047	0.119047
mRNA.half.life.short1	THR	0.373464	0.373464
mRNA.half.life.short1	TYR	0.326739	0.326739
mRNA.half.life.short1	VAL	0.299469	0.299469
mRNA.half.life.short1	FOP.SCORE..Frequency.of.Optimal.Codons.	0.294101	0.294101
mRNA.half.life.short1	GRAVY.SCORE..Hydropathicity.of.Protein.	0.0866907	0.0866907
mRNA.half.life.short1	AROMATICITY.SCORE..Frequency.of.aromatic.amino.acids..Phe..Tyr..Trp.	0.244519	0.244519
mRNA.half.life.short1	econt	0.234672	0.234672
mRNA.half.life.short1	ccont	0.34532	0.34532
mRNA.half.life.short1	hcont	0.435479	0.435479
mRNA.half.life.short1	econtrel	0.613441	0.613441
mRNA.half.life.short1	hcontrel	0.270656	0.270656
Ribosome.occupancy1	Ribosome.density..rb.kb.1	0.315237	0.315237
Ribosome.occupancy1	ORF.length..nt.1	0.370636	0.370636
Ribosome.occupancy1	GO.0006350_TRANSCRIPTION1	0.551769	0.551769
Ribosome.occupancy1	GO.0006412_PROTEIN_BIOSYNTHESIS1	0.0898094	0.0898094
Ribosome.occupancy1	GO.0006810_TRANSPORT1	0.12169	0.12169
Ribosome.occupancy1	GO.0016070_RNA_METABOLISM1	0.230938	0.230938
Ribosome.occupancy1	nuc1	0.156471	0.156471
Ribosome.occupancy1	cyto1	0.116769	0.116769
Ribosome.occupancy1	MOLECULAR.WEIGHT..in.Daltons.	0.34586	0.34586
Ribosome.occupancy1	PI	0.0899654	0.0899654
Ribosome.occupancy1	CAI..Codon.Adaptation.Index.	0.175283	0.175283
Ribosome.occupancy1	PROTEIN.LENGTH	0.372657	0.372657
Ribosome.occupancy1	CODON.BIAS	0.107871	0.107871
Ribosome.occupancy1	ALA	0.443329	0.443329
Ribosome.occupancy1	ARG	0.575894	0.575894
Ribosome.occupancy1	ASN	0.307444	0.307444
Ribosome.occupancy1	ASP	0.249711	0.249711
Ribosome.occupancy1	CYS	0.522485	0.522485
Ribosome.occupancy1	GLN	0.159562	0.159562
Ribosome.occupancy1	GLU	0.216685	0.216685
Ribosome.occupancy1	GLY	0.511353	0.511353
Ribosome.occupancy1	HIS	0.476245	0.476245
Ribosome.occupancy1	ILE	0.299617	0.299617
Ribosome.occupancy1	LEU	0.173165	0.173165
Ribosome.occupancy1	LYS	0.188783	0.188783
Ribosome.occupancy1	MET	0.113563	0.113563
Ribosome.occupancy1	PHE	0.415218	0.415218
Ribosome.occupancy1	PRO	0.497838	0.497838
Ribosome.occupancy1	SER	0.769262	0.769262
Ribosome.occupancy1	THR	0.550165	0.550165
Ribosome.occupancy1	TRP	0.421485	0.421485
Ribosome.occupancy1	TYR	0.44297	0.44297
Ribosome.occupancy1	VAL	0.220029	0.220029
Ribosome.occupancy1	FOP.SCORE..Frequency.of.Optimal.Codons.	0.109854	0.109854
Ribosome.occupancy1	GRAVY.SCORE..Hydropathicity.of.Protein.	0.386169	0.386169
Ribosome.occupancy1	econt	0.30445	0.30445
Ribosome.occupancy1	ccont	0.649351	0.649351
Ribosome.occupancy1	hcont	0.172559	0.172559
Ribosome.occupancy1	ccontrel	0.291672	0.291672
Ribosome.density..rb.kb.1	ORF.length..nt.1	0.435471	0.435471
Ribosome.density..rb.kb.1	mRNA.level1	0.491173	0.491173
Ribosome.density..rb.kb.1	GO.0006350_TRANSCRIPTION1	0.657941	0.657941
Ribosome.density..rb.kb.1	GO.0006412_PROTEIN_BIOSYNTHESIS1	0.606688	0.606688
Ribosome.density..rb.kb.1	GO.0006810_TRANSPORT1	0.217294	0.217294
Ribosome.density..rb.kb.1	GO.0008150_BIOLOGICAL_PROCESS1	0.143928	0.143928
Ribosome.density..rb.kb.1	GO.0016070_RNA_METABOLISM1	0.154037	0.154037
Ribosome.density..rb.kb.1	cyto1	0.277259	0.277259
Ribosome.density..rb.kb.1	er1	0.131828	0.131828
Ribosome.density..rb.kb.1	MOLECULAR.WEIGHT..in.Daltons.	0.432928	0.432928
Ribosome.density..rb.kb.1	PI	0.348235	0.348235
Ribosome.density..rb.kb.1	CAI..Codon.Adaptation.Index.	0.703483	0.703483
Ribosome.density..rb.kb.1	PROTEIN.LENGTH	0.437092	0.437092
Ribosome.density..rb.kb.1	CODON.BIAS	0.729714	0.729714
Ribosome.density..rb.kb.1	ALA	0.23727	0.23727
Ribosome.density..rb.kb.1	ARG	0.343811	0.343811
Ribosome.density..rb.kb.1	ASN	0.550998	0.550998
Ribosome.density..rb.kb.1	ASP	0.606534	0.606534
Ribosome.density..rb.kb.1	CYS	0.543998	0.543998
Ribosome.density..rb.kb.1	HIS	0.463895	0.463895
Ribosome.density..rb.kb.1	ILE	0.731231	0.731231
Ribosome.density..rb.kb.1	LEU	0.666849	0.666849
Ribosome.density..rb.kb.1	LYS	0.3488	0.3488
Ribosome.density..rb.kb.1	PHE	0.119217	0.119217
Ribosome.density..rb.kb.1	PRO	0.395927	0.395927
Ribosome.density..rb.kb.1	SER	0.477854	0.477854
Ribosome.density..rb.kb.1	THR	0.615559	0.615559
Ribosome.density..rb.kb.1	TRP	0.476861	0.476861
Ribosome.density..rb.kb.1	TYR	0.268824	0.268824
Ribosome.density..rb.kb.1	VAL	0.370864	0.370864
Ribosome.density..rb.kb.1	FOP.SCORE..Frequency.of.Optimal.Codons.	0.726311	0.726311
Ribosome.density..rb.kb.1	GRAVY.SCORE..Hydropathicity.of.Protein.	0.515693	0.515693
Ribosome.density..rb.kb.1	AROMATICITY.SCORE..Frequency.of.aromatic.amino.acids..Phe..Tyr..Trp.	0.495987	0.495987
Ribosome.density..rb.kb.1	econt	0.143407	0.143407
Ribosome.density..rb.kb.1	ccont	0.398572	0.398572
Ribosome.density..rb.kb.1	hcont	0.571889	0.571889
Ribosome.density..rb.kb.1	econtrel	0.482132	0.482132
Ribosome.density..rb.kb.1	hcontrel	0.405387	0.405387
ORF.length..nt.1	GO.0006350_TRANSCRIPTION1	0.635312	0.635312
ORF.length..nt.1	GO.0006412_PROTEIN_BIOSYNTHESIS1	0.257547	0.257547
ORF.length..nt.1	GO.0006810_TRANSPORT1	0.451733	0.451733
ORF.length..nt.1	GO.0008150_BIOLOGICAL_PROCESS1	0.177337	0.177337
ORF.length..nt.1	nuc1	0.327471	0.327471
ORF.length..nt.1	er1	0.544351	0.544351
ORF.length..nt.1	MOLECULAR.WEIGHT..in.Daltons.	0.998031	0.998031
ORF.length..nt.1	PI	0.265121	0.265121
ORF.length..nt.1	CAI..Codon.Adaptation.Index.	0.0896068	0.0896068
ORF.length..nt.1	PROTEIN.LENGTH	0.999631	0.999631
ORF.length..nt.1	CODON.BIAS	0.147041	0.147041
ORF.length..nt.1	ALA	0.850422	0.850422
ORF.length..nt.1	ARG	0.441019	0.441019
ORF.length..nt.1	ASN	0.757014	0.757014
ORF.length..nt.1	ASP	0.807478	0.807478
ORF.length..nt.1	CYS	0.579187	0.579187
ORF.length..nt.1	GLN	0.274735	0.274735
ORF.length..nt.1	GLU	0.495504	0.495504
ORF.length..nt.1	GLY	0.366312	0.366312
ORF.length..nt.1	HIS	0.691613	0.691613
ORF.length..nt.1	ILE	0.80143	0.80143
ORF.length..nt.1	LEU	0.832975	0.832975
ORF.length..nt.1	LYS	0.722955	0.722955
ORF.length..nt.1	MET	0.420772	0.420772
ORF.length..nt.1	PHE	0.713367	0.713367
ORF.length..nt.1	PRO	0.619636	0.619636
ORF.length..nt.1	SER	0.701285	0.701285
ORF.length..nt.1	THR	0.874441	0.874441
ORF.length..nt.1	TRP	0.30808	0.30808
ORF.length..nt.1	TYR	0.832435	0.832435
ORF.length..nt.1	VAL	0.943781	0.943781
ORF.length..nt.1	FOP.SCORE..Frequency.of.Optimal.Codons.	0.140591	0.140591
ORF.length..nt.1	GRAVY.SCORE..Hydropathicity.of.Protein.	0.649614	0.649614
ORF.length..nt.1	AROMATICITY.SCORE..Frequency.of.aromatic.amino.acids..Phe..Tyr..Trp.	0.187671	0.187671
ORF.length..nt.1	econt	0.469653	0.469653
ORF.length..nt.1	ccont	0.778592	0.778592
ORF.length..nt.1	hcont	0.793328	0.793328
ORF.length..nt.1	econtrel	0.0903083	0.0903083
ORF.length..nt.1	ccontrel	0.359251	0.359251
ORF.length..nt.1	hcontrel	0.520768	0.520768
mRNA.level1	GO.0006350_TRANSCRIPTION1	0.193092	0.193092
mRNA.level1	GO.0006412_PROTEIN_BIOSYNTHESIS1	0.46951	0.46951
mRNA.level1	GO.0008150_BIOLOGICAL_PROCESS1	0.238061	0.238061
mRNA.level1	GO.0016070_RNA_METABOLISM1	0.25354	0.25354
mRNA.level1	nuc1	0.337764	0.337764
mRNA.level1	cyto1	0.210237	0.210237
mRNA.level1	er1	0.552979	0.552979
mRNA.level1	CAI..Codon.Adaptation.Index.	0.847218	0.847218
mRNA.level1	CODON.BIAS	0.802022	0.802022
mRNA.level1	ALA	0.184016	0.184016
mRNA.level1	ARG	0.148688	0.148688
mRNA.level1	ASN	0.322694	0.322694
mRNA.level1	ASP	0.126028	0.126028
mRNA.level1	CYS	0.24642	0.24642
mRNA.level1	GLN	0.456366	0.456366
mRNA.level1	GLU	0.637819	0.637819
mRNA.level1	GLY	0.224547	0.224547
mRNA.level1	HIS	0.283771	0.283771
mRNA.level1	ILE	0.194339	0.194339
mRNA.level1	LYS	0.425748	0.425748
mRNA.level1	MET	0.169875	0.169875
mRNA.level1	PHE	0.0908744	0.0908744
mRNA.level1	PRO	0.274224	0.274224
mRNA.level1	THR	0.0972875	0.0972875
mRNA.level1	TRP	0.233314	0.233314
mRNA.level1	VAL	0.08158	0.08158
mRNA.level1	FOP.SCORE..Frequency.of.Optimal.Codons.	0.79749	0.79749
mRNA.level1	GRAVY.SCORE..Hydropathicity.of.Protein.	0.136483	0.136483
mRNA.level1	econt	0.42974	0.42974
mRNA.level1	ccont	0.169308	0.169308
mRNA.level1	hcont	0.0880738	0.0880738
mRNA.level1	econtrel	0.394812	0.394812
mRNA.level1	ccontrel	0.510205	0.510205
mRNA.level1	hcontrel	0.195108	0.195108
GO.0006350_TRANSCRIPTION1	GO.0006412_PROTEIN_BIOSYNTHESIS1	0.251472	0.251472
GO.0006350_TRANSCRIPTION1	GO.0006810_TRANSPORT1	0.208212	0.208212
GO.0006350_TRANSCRIPTION1	GO.0008150_BIOLOGICAL_PROCESS1	0.111443	0.111443
GO.0006350_TRANSCRIPTION1	GO.0016070_RNA_METABOLISM1	0.12643	0.12643
GO.0006350_TRANSCRIPTION1	nuc1	0.153221	0.153221
GO.0006350_TRANSCRIPTION1	cyto1	0.369842	0.369842
GO.0006350_TRANSCRIPTION1	er1	0.162033	0.162033
GO.0006350_TRANSCRIPTION1	MOLECULAR.WEIGHT..in.Daltons.	0.634552	0.634552
GO.0006350_TRANSCRIPTION1	CAI..Codon.Adaptation.Index.	0.372729	0.372729
GO.0006350_TRANSCRIPTION1	PROTEIN.LENGTH	0.635312	0.635312
GO.0006350_TRANSCRIPTION1	CODON.BIAS	0.349886	0.349886
GO.0006350_TRANSCRIPTION1	ALA	0.559284	0.559284
GO.0006350_TRANSCRIPTION1	ARG	0.499677	0.499677
GO.0006350_TRANSCRIPTION1	ASN	0.605958	0.605958
GO.0006350_TRANSCRIPTION1	ASP	0.624142	0.624142
GO.0006350_TRANSCRIPTION1	CYS	0.5136	0.5136
GO.0006350_TRANSCRIPTION1	GLN	0.0825301	0.0825301
GO.0006350_TRANSCRIPTION1	GLU	0.269334	0.269334
GO.0006350_TRANSCRIPTION1	GLY	0.388046	0.388046
GO.0006350_TRANSCRIPTION1	HIS	0.717436	0.717436
GO.0006350_TRANSCRIPTION1	ILE	0.689775	0.689775
GO.0006350_TRANSCRIPTION1	LEU	0.60908	0.60908
GO.0006350_TRANSCRIPTION1	LYS	0.443314	0.443314
GO.0006350_TRANSCRIPTION1	MET	0.20907	0.20907
GO.0006350_TRANSCRIPTION1	PHE	0.415062	0.415062
GO.0006350_TRANSCRIPTION1	PRO	0.661044	0.661044
GO.0006350_TRANSCRIPTION1	SER	0.667125	0.667125
GO.0006350_TRANSCRIPTION1	THR	0.716225	0.716225
GO.0006350_TRANSCRIPTION1	TRP	0.471217	0.471217
GO.0006350_TRANSCRIPTION1	TYR	0.548893	0.548893
GO.0006350_TRANSCRIPTION1	VAL	0.545744	0.545744
GO.0006350_TRANSCRIPTION1	FOP.SCORE..Frequency.of.Optimal.Codons.	0.347906	0.347906
GO.0006350_TRANSCRIPTION1	GRAVY.SCORE..Hydropathicity.of.Protein.	0.529644	0.529644
GO.0006350_TRANSCRIPTION1	AROMATICITY.SCORE..Frequency.of.aromatic.amino.acids..Phe..Tyr..Trp.	0.335643	0.335643
GO.0006350_TRANSCRIPTION1	econt	0.181762	0.181762
GO.0006350_TRANSCRIPTION1	ccont	0.690103	0.690103
GO.0006350_TRANSCRIPTION1	hcont	0.605186	0.605186
GO.0006350_TRANSCRIPTION1	econtrel	0.244183	0.244183
GO.0006350_TRANSCRIPTION1	hcontrel	0.374858	0.374858
GO.0006412_PROTEIN_BIOSYNTHESIS1	GO.0006810_TRANSPORT1	0.153576	0.153576
GO.0006412_PROTEIN_BIOSYNTHESIS1	GO.0008150_BIOLOGICAL_PROCESS1	0.0821995	0.0821995
GO.0006412_PROTEIN_BIOSYNTHESIS1	GO.0016070_RNA_METABOLISM1	0.0932538	0.0932538
GO.0006412_PROTEIN_BIOSYNTHESIS1	nuc1	0.225672	0.225672
GO.0006412_PROTEIN_BIOSYNTHESIS1	cyto1	0.479583	0.479583
GO.0006412_PROTEIN_BIOSYNTHESIS1	er1	0.511649	0.511649
GO.0006412_PROTEIN_BIOSYNTHESIS1	MOLECULAR.WEIGHT..in.Daltons.	0.257258	0.257258
GO.0006412_PROTEIN_BIOSYNTHESIS1	PI	0.126766	0.126766
GO.0006412_PROTEIN_BIOSYNTHESIS1	CAI..Codon.Adaptation.Index.	0.545159	0.545159
GO.0006412_PROTEIN_BIOSYNTHESIS1	PROTEIN.LENGTH	0.257547	0.257547
GO.0006412_PROTEIN_BIOSYNTHESIS1	CODON.BIAS	0.544306	0.544306
GO.0006412_PROTEIN_BIOSYNTHESIS1	ALA	0.408722	0.408722
GO.0006412_PROTEIN_BIOSYNTHESIS1	ASP	0.0855851	0.0855851
GO.0006412_PROTEIN_BIOSYNTHESIS1	GLN	0.192926	0.192926
GO.0006412_PROTEIN_BIOSYNTHESIS1	GLU	0.207212	0.207212
GO.0006412_PROTEIN_BIOSYNTHESIS1	GLY	0.125116	0.125116
GO.0006412_PROTEIN_BIOSYNTHESIS1	ILE	0.109543	0.109543
GO.0006412_PROTEIN_BIOSYNTHESIS1	LYS	0.150547	0.150547
GO.0006412_PROTEIN_BIOSYNTHESIS1	MET	0.307106	0.307106
GO.0006412_PROTEIN_BIOSYNTHESIS1	PHE	0.290241	0.290241
GO.0006412_PROTEIN_BIOSYNTHESIS1	THR	0.121963	0.121963
GO.0006412_PROTEIN_BIOSYNTHESIS1	TRP	0.291548	0.291548
GO.0006412_PROTEIN_BIOSYNTHESIS1	TYR	0.290062	0.290062
GO.0006412_PROTEIN_BIOSYNTHESIS1	VAL	0.271829	0.271829
GO.0006412_PROTEIN_BIOSYNTHESIS1	FOP.SCORE..Frequency.of.Optimal.Codons.	0.545157	0.545157
GO.0006412_PROTEIN_BIOSYNTHESIS1	GRAVY.SCORE..Hydropathicity.of.Protein.	0.114729	0.114729
GO.0006412_PROTEIN_BIOSYNTHESIS1	AROMATICITY.SCORE..Frequency.of.aromatic.amino.acids..Phe..Tyr..Trp.	0.390948	0.390948
GO.0006412_PROTEIN_BIOSYNTHESIS1	econt	0.412843	0.412843
GO.0006412_PROTEIN_BIOSYNTHESIS1	ccont	0.144335	0.144335
GO.0006412_PROTEIN_BIOSYNTHESIS1	econtrel	0.592619	0.592619
GO.0006412_PROTEIN_BIOSYNTHESIS1	ccontrel	0.195268	0.195268
GO.0006810_TRANSPORT1	nuc1	0.680527	0.680527
GO.0006810_TRANSPORT1	cyto1	0.316623	0.316623
GO.0006810_TRANSPORT1	er1	0.29648	0.29648
GO.0006810_TRANSPORT1	MOLECULAR.WEIGHT..in.Daltons.	0.419145	0.419145
GO.0006810_TRANSPORT1	PI	0.166069	0.166069
GO.0006810_TRANSPORT1	PROTEIN.LENGTH	0.447433	0.447433
GO.0006810_TRANSPORT1	CODON.BIAS	0.163817	0.163817
GO.0006810_TRANSPORT1	ALA	0.526178	0.526178
GO.0006810_TRANSPORT1	ARG	0.381312	0.381312
GO.0006810_TRANSPORT1	ASN	0.470209	0.470209
GO.0006810_TRANSPORT1	ASP	0.393877	0.393877
GO.0006810_TRANSPORT1	CYS	0.23859	0.23859
GO.0006810_TRANSPORT1	GLN	0.393019	0.393019
GO.0006810_TRANSPORT1	GLU	0.132673	0.132673
GO.0006810_TRANSPORT1	GLY	0.424317	0.424317
GO.0006810_TRANSPORT1	HIS	0.0885373	0.0885373
GO.0006810_TRANSPORT1	ILE	0.536597	0.536597
GO.0006810_TRANSPORT1	LEU	0.435326	0.435326
GO.0006810_TRANSPORT1	LYS	0.514373	0.514373
GO.0006810_TRANSPORT1	MET	0.275519	0.275519
GO.0006810_TRANSPORT1	PRO	0.18279	0.18279
GO.0006810_TRANSPORT1	SER	0.401718	0.401718
GO.0006810_TRANSPORT1	THR	0.500205	0.500205
GO.0006810_TRANSPORT1	TRP	0.20556	0.20556
GO.0006810_TRANSPORT1	VAL	0.441696	0.441696
GO.0006810_TRANSPORT1	FOP.SCORE..Frequency.of.Optimal.Codons.	0.158504	0.158504
GO.0006810_TRANSPORT1	GRAVY.SCORE..Hydropathicity.of.Protein.	0.435609	0.435609
GO.0006810_TRANSPORT1	AROMATICITY.SCORE..Frequency.of.aromatic.amino.acids..Phe..Tyr..Trp.	0.481826	0.481826
GO.0006810_TRANSPORT1	econt	0.0985412	0.0985412
GO.0006810_TRANSPORT1	ccont	0.0949142	0.0949142
GO.0006810_TRANSPORT1	hcont	0.530397	0.530397
GO.0006810_TRANSPORT1	ccontrel	0.437817	0.437817
GO.0006810_TRANSPORT1	hcontrel	0.532742	0.532742
GO.0008150_BIOLOGICAL_PROCESS1	nuc1	0.100009	0.100009
GO.0008150_BIOLOGICAL_PROCESS1	cyto1	0.212533	0.212533
GO.0008150_BIOLOGICAL_PROCESS1	er1	0.158687	0.158687
GO.0008150_BIOLOGICAL_PROCESS1	MOLECULAR.WEIGHT..in.Daltons.	0.177138	0.177138
GO.0008150_BIOLOGICAL_PROCESS1	CAI..Codon.Adaptation.Index.	0.247599	0.247599
GO.0008150_BIOLOGICAL_PROCESS1	PROTEIN.LENGTH	0.177337	0.177337
GO.0008150_BIOLOGICAL_PROCESS1	CODON.BIAS	0.290522	0.290522
GO.0008150_BIOLOGICAL_PROCESS1	ARG	0.0855703	0.0855703
GO.0008150_BIOLOGICAL_PROCESS1	ASN	0.189778	0.189778
GO.0008150_BIOLOGICAL_PROCESS1	ASP	0.0873536	0.0873536
GO.0008150_BIOLOGICAL_PROCESS1	CYS	0.284059	0.284059
GO.0008150_BIOLOGICAL_PROCESS1	GLU	0.114243	0.114243
GO.0008150_BIOLOGICAL_PROCESS1	ILE	0.193455	0.193455
GO.0008150_BIOLOGICAL_PROCESS1	LYS	0.105232	0.105232
GO.0008150_BIOLOGICAL_PROCESS1	PHE	0.266007	0.266007
GO.0008150_BIOLOGICAL_PROCESS1	SER	0.0952082	0.0952082
GO.0008150_BIOLOGICAL_PROCESS1	THR	0.137875	0.137875
GO.0008150_BIOLOGICAL_PROCESS1	TYR	0.210279	0.210279
GO.0008150_BIOLOGICAL_PROCESS1	VAL	0.189572	0.189572
GO.0008150_BIOLOGICAL_PROCESS1	FOP.SCORE..Frequency.of.Optimal.Codons.	0.280699	0.280699
GO.0008150_BIOLOGICAL_PROCESS1	GRAVY.SCORE..Hydropathicity.of.Protein.	0.207888	0.207888
GO.0008150_BIOLOGICAL_PROCESS1	AROMATICITY.SCORE..Frequency.of.aromatic.amino.acids..Phe..Tyr..Trp.	0.310835	0.310835
GO.0008150_BIOLOGICAL_PROCESS1	econt	0.127796	0.127796
GO.0008150_BIOLOGICAL_PROCESS1	ccont	0.171379	0.171379
GO.0008150_BIOLOGICAL_PROCESS1	econtrel	0.11795	0.11795
GO.0008150_BIOLOGICAL_PROCESS1	ccontrel	0.159609	0.159609
GO.0008150_BIOLOGICAL_PROCESS1	hcontrel	0.206775	0.206775
GO.0008150_BIOLOGICAL_PROCESS1	GO.0007049_CELL_CYCLE2	0.000818883	0.000818883
GO.0016070_RNA_METABOLISM1	nuc1	0.0965494	0.0965494
GO.0016070_RNA_METABOLISM1	er1	0.180028	0.180028
GO.0016070_RNA_METABOLISM1	PI	0.117048	0.117048
GO.0016070_RNA_METABOLISM1	CAI..Codon.Adaptation.Index.	0.328214	0.328214
GO.0016070_RNA_METABOLISM1	CODON.BIAS	0.337674	0.337674
GO.0016070_RNA_METABOLISM1	ALA	0.119354	0.119354
GO.0016070_RNA_METABOLISM1	CYS	0.207151	0.207151
GO.0016070_RNA_METABOLISM1	GLU	0.196547	0.196547
GO.0016070_RNA_METABOLISM1	LYS	0.0951987	0.0951987
GO.0016070_RNA_METABOLISM1	PRO	0.081888	0.081888
GO.0016070_RNA_METABOLISM1	SER	0.0997734	0.0997734
GO.0016070_RNA_METABOLISM1	THR	0.0915777	0.0915777
GO.0016070_RNA_METABOLISM1	FOP.SCORE..Frequency.of.Optimal.Codons.	0.344358	0.344358
GO.0016070_RNA_METABOLISM1	econt	0.199978	0.199978
GO.0016070_RNA_METABOLISM1	ccont	0.127336	0.127336
GO.0016070_RNA_METABOLISM1	econtrel	0.224321	0.224321
GO.0016070_RNA_METABOLISM1	ccontrel	0.328392	0.328392
GO.0016070_RNA_METABOLISM1	hcontrel	0.0879194	0.0879194
nuc1	cyto1	0.455302	0.455302
nuc1	er1	0.435662	0.435662
nuc1	MOLECULAR.WEIGHT..in.Daltons.	0.308043	0.308043
nuc1	CAI..Codon.Adaptation.Index.	0.305958	0.305958
nuc1	PROTEIN.LENGTH	0.324162	0.324162
nuc1	CODON.BIAS	0.172684	0.172684
nuc1	ALA	0.453367	0.453367
nuc1	ARG	0.363513	0.363513
nuc1	ASN	0.356909	0.356909
nuc1	ASP	0.272779	0.272779
nuc1	GLN	0.157276	0.157276
nuc1	GLU	0.345339	0.345339
nuc1	GLY	0.211102	0.211102
nuc1	HIS	0.171045	0.171045
nuc1	ILE	0.323212	0.323212
nuc1	LEU	0.312389	0.312389
nuc1	LYS	0.518597	0.518597
nuc1	MET	0.235627	0.235627
nuc1	PHE	0.202925	0.202925
nuc1	PRO	0.267929	0.267929
nuc1	SER	0.225847	0.225847
nuc1	THR	0.257975	0.257975
nuc1	VAL	0.433449	0.433449
nuc1	FOP.SCORE..Frequency.of.Optimal.Codons.	0.179773	0.179773
nuc1	GRAVY.SCORE..Hydropathicity.of.Protein.	0.309103	0.309103
nuc1	AROMATICITY.SCORE..Frequency.of.aromatic.amino.acids..Phe..Tyr..Trp.	0.392767	0.392767
nuc1	econt	0.302251	0.302251
[truncated: 2,819 more rows]

## Sheet: DS5_p-values
### Average of p-values of correlations between features of the proteins and mRNA targets in 100 randomized negative sets
chromosome1	strand1	2.05624e-153	2.05624e-153
chromosome1	start1	0.160189	0.160189
chromosome1	stop1	0.160189	0.160189
chromosome1	protlength1	6.6728e-20	6.6728e-20
chromosome1	pH1	7.05471e-17	7.05471e-17
chromosome1	kDa1	1.31706e-18	1.31706e-18
chromosome1	G1	0	0
chromosome1	A1	5.21492e-118	5.21492e-118
chromosome1	L1	6.79031e-137	6.79031e-137
chromosome1	M1	0.0073541	0.0073541
chromosome1	F1	3.97919e-198	3.97919e-198
chromosome1	W1	1.86728e-16	1.86728e-16
chromosome1	K1	1.15363e-23	1.15363e-23
chromosome1	Q1	1.5672e-251	1.5672e-251
chromosome1	E1	1.17046e-17	1.17046e-17
chromosome1	S1	0.000652871	0.000652871
chromosome1	P1	7.95265e-10	7.95265e-10
chromosome1	V1	3.3518e-59	3.3518e-59
chromosome1	I1	5.45447e-151	5.45447e-151
chromosome1	C1	1.71139e-09	1.71139e-09
chromosome1	Y1	1.64887e-92	1.64887e-92
chromosome1	H1	4.82751e-24	4.82751e-24
chromosome1	R1	4.24172e-33	4.24172e-33
chromosome1	N1	1.29730425322550e-312	1.2973042532255e-312
chromosome1	D1	0	0
chromosome1	T1	1.23096e-24	1.23096e-24
chromosome1	ncont1	9.28061e-83	9.28061e-83
chromosome1	scont1	0.00057926	0.00057926
chromosome1	Number.of.introns1	0.134214	0.134214
chromosome1	First.intron.length1	0.134851	0.134851
chromosome1	First.intron.GC1	0.144723	0.144723
chromosome1	mRNA.half.life.short1	7.4228e-41	7.4228e-41
chromosome1	Ribosome.occupancy1	3.75836e-69	3.75836e-69
chromosome1	Ribosome.density..rb.kb.1	1.44215e-107	1.44215e-107
chromosome1	ORF.length..nt.1	6.6728e-20	6.6728e-20
chromosome1	mRNA.level1	1.36132e-144	1.36132e-144
chromosome1	GO.0006350_TRANSCRIPTION1	1.94877e-07	1.94877e-07
chromosome1	GO.0006412_PROTEIN_BIOSYNTHESIS1	3.7444e-143	3.7444e-143
chromosome1	GO.0006810_TRANSPORT1	4.08797e-214	4.08797e-214
chromosome1	GO.0008150_BIOLOGICAL_PROCESS1	1.95919e-65	1.95919e-65
chromosome1	GO.0016070_RNA_METABOLISM1	1.21758e-52	1.21758e-52
chromosome1	nuc1	4.11952e-18	4.11952e-18
chromosome1	cyto1	1.46956e-07	1.46956e-07
chromosome1	mito1	0.501846	0.501846
chromosome1	er1	0.00600857	0.00600857
chromosome1	MOLECULAR.WEIGHT..in.Daltons.	1.31706e-18	1.31706e-18
chromosome1	PI	7.05471e-17	7.05471e-17
chromosome1	CAI..Codon.Adaptation.Index.	3.63339e-92	3.63339e-92
chromosome1	PROTEIN.LENGTH	6.6728e-20	6.6728e-20
chromosome1	CODON.BIAS	4.0743e-182	4.0743e-182
chromosome1	ALA	1.27879e-13	1.27879e-13
chromosome1	ARG	8.80869e-83	8.80869e-83
chromosome1	ASN	4.29461e-79	4.29461e-79
chromosome1	ASP	8.33581e-84	8.33581e-84
chromosome1	CYS	0.000689096	0.000689096
chromosome1	GLN	2.31396e-153	2.31396e-153
chromosome1	GLU	2.90464e-39	2.90464e-39
chromosome1	GLY	1.44286e-258	1.44286e-258
chromosome1	HIS	5.01217e-26	5.01217e-26
chromosome1	ILE	5.49513e-62	5.49513e-62
chromosome1	LEU	9.28857e-66	9.28857e-66
chromosome1	LYS	4.00131e-12	4.00131e-12
chromosome1	MET	0.552499	0.552499
chromosome1	PHE	1.18353e-55	1.18353e-55
chromosome1	PRO	7.2942e-37	7.2942e-37
chromosome1	SER	5.26329e-05	5.26329e-05
chromosome1	THR	1.02263e-11	1.02263e-11
chromosome1	TRP	7.56733e-30	7.56733e-30
chromosome1	TYR	2.34277e-19	2.34277e-19
chromosome1	VAL	1.32723e-15	1.32723e-15
chromosome1	FOP.SCORE..Frequency.of.Optimal.Codons.	1.26736e-179	1.26736e-179
chromosome1	GRAVY.SCORE..Hydropathicity.of.Protein.	2.85214e-05	2.85214e-05
chromosome1	AROMATICITY.SCORE..Frequency.of.aromatic.amino.acids..Phe..Tyr..Trp.	1.40194e-101	1.40194e-101
chromosome1	econt	7.52259e-98	7.52259e-98
chromosome1	ccont	7.95932e-14	7.95932e-14
chromosome1	hcont	2.25015e-81	2.25015e-81
chromosome1	econtrel	9.79813e-99	9.79813e-99
chromosome1	ccontrel	2.24171e-13	2.24171e-13
chromosome1	hcontrel	1.36357e-67	1.36357e-67
chromosome1	gene2	0.50774	0.50774
chromosome1	tfcode2	0.465892	0.465892
chromosome1	chromosome2	0.49912	0.49912
chromosome1	strand2	0.53613	0.53613
chromosome1	start2	0.478787	0.478787
chromosome1	stop2	0.479332	0.479332
chromosome1	protlength2	0.423526	0.423526
chromosome1	pH2	0.594869	0.594869
chromosome1	kDa2	0.41792	0.41792
chromosome1	G2	0.5914	0.5914
chromosome1	A2	0.540953	0.540953
chromosome1	L2	0.494506	0.494506
chromosome1	M2	0.389682	0.389682
chromosome1	F2	0.489277	0.489277
chromosome1	W2	0.540737	0.540737
chromosome1	K2	0.509084	0.509084
chromosome1	Q2	0.518046	0.518046
chromosome1	E2	0.510613	0.510613
chromosome1	S2	0.531799	0.531799
chromosome1	P2	0.419924	0.419924
chromosome1	V2	0.498422	0.498422
chromosome1	I2	0.457365	0.457365
chromosome1	C2	0.606822	0.606822
chromosome1	Y2	0.506623	0.506623
chromosome1	H2	0.50933	0.50933
chromosome1	R2	0.556369	0.556369
chromosome1	N2	0.429634	0.429634
chromosome1	D2	0.565508	0.565508
chromosome1	T2	0.49689	0.49689
chromosome1	ncont2	0.546672	0.546672
chromosome1	scont2	0.536284	0.536284
chromosome1	Number.of.introns2	0.47756	0.47756
chromosome1	First.intron.length2	0.470705	0.470705
chromosome1	First.intron.GC2	0.482559	0.482559
chromosome1	mRNA.half.life.short2	0.447903	0.447903
chromosome1	Ribosome.occupancy2	0.412987	0.412987
chromosome1	Ribosome.density..rb.kb.2	0.497784	0.497784
chromosome1	ORF.length..nt.2	0.432013	0.432013
chromosome1	mRNA.level2	0.446595	0.446595
chromosome1	GO.0006350_TRANSCRIPTION2	0.46604	0.46604
chromosome1	GO.0006412_PROTEIN_BIOSYNTHESIS2	0.389953	0.389953
chromosome1	GO.0006810_TRANSPORT2	0.502841	0.502841
chromosome1	GO.0007049_CELL_CYCLE2	0.461458	0.461458
chromosome1	GO.0007165_SIGNAL_TRANSDUCTION2	0.485029	0.485029
chromosome1	GO.0008150_BIOLOGICAL_PROCESS2	0.568603	0.568603
chromosome1	GO.0016070_RNA_METABOLISM2	0.458561	0.458561
chromosome1	nuc2	0.489867	0.489867
chromosome1	vac2	0.462591	0.462591
chromosome1	cyto2	0.525738	0.525738
chromosome1	mito2	0.541657	0.541657
chromosome1	relinstems	0.587866	0.587866
chromosome1	length	0.421603	0.421603
chromosome1	relnostems	0.44753	0.44753
chromosome1	nstems	0.410869	0.410869
chromosome1	cs3	0.520786	0.520786
chromosome1	cs5	0.541952	0.541952
chromosome1	csorf	0.506225	0.506225
chromosome1	lu3	0.40427	0.40427
chromosome1	u3A	0.503791	0.503791
chromosome1	u3C	0.500874	0.500874
chromosome1	u3T	0.466397	0.466397
chromosome1	u3G	0.468939	0.468939
chromosome1	u3AC	0.513468	0.513468
chromosome1	u3AT	0.597313	0.597313
chromosome1	u3AG	0.495035	0.495035
chromosome1	u3CT	0.529328	0.529328
chromosome1	u3CG	0.462625	0.462625
chromosome1	u3TG	0.470847	0.470847
chromosome1	X3AUel	0.398007	0.398007
chromosome1	lu5	0.507187	0.507187
chromosome1	u5A	0.509936	0.509936
chromosome1	u5C	0.470513	0.470513
chromosome1	u5T	0.538543	0.538543
chromosome1	u5G	0.517101	0.517101
chromosome1	u5AC	0.478725	0.478725
chromosome1	u5AT	0.484833	0.484833
chromosome1	u5AG	0.483517	0.483517
chromosome1	u5CT	0.542303	0.542303
chromosome1	u5CG	0.448877	0.448877
chromosome1	u5TG	0.471783	0.471783
chromosome1	X5AUel	0.506446	0.506446
chromosome1	lcds	0.423526	0.423526
chromosome1	cdsA	0.517445	0.517445
chromosome1	cdsC	0.44528	0.44528
chromosome1	cdsT	0.554357	0.554357
chromosome1	cdsG	0.495022	0.495022
chromosome1	cdsAC	0.544649	0.544649
chromosome1	cdsAT	0.428255	0.428255
chromosome1	cdsAG	0.536879	0.536879
chromosome1	cdsCT	0.483126	0.483126
chromosome1	cdsCG	0.519306	0.519306
chromosome1	cdsTG	0.511597	0.511597
chromosome1	cdsAUel	0.424119	0.424119
chromosome1	ene	0.421054	0.421054
chromosome1	halflife	0.470542	0.470542
chromosome1	nostems	0.434838	0.434838
chromosome1	relstems	0.512075	0.512075
chromosome1	length.1	0.426502	0.426502
chromosome1	lu3.1	0.40427	0.40427
chromosome1	lu5.1	0.507187	0.507187
chromosome1	lorf.1	0.423526	0.423526
chromosome1	relnostems.1	0.504554	0.504554
chromosome1	X3stems	0.518681	0.518681
chromosome1	X5stems	0.452744	0.452744
chromosome1	orfstems	0.485401	0.485401
chromosome1	c3	0.492571	0.492571
chromosome1	c5	0.442354	0.442354
chromosome1	co	0.43222	0.43222
chromosome1	orflength	0.426502	0.426502
chromosome1	score	0.468506	0.468506
chromosome1	gen	0.4972	0.4972
chromosome1	lu3rel	0.4719	0.4719
chromosome1	lu5rel	0.489846	0.489846
strand1	start1	2.66945e-30	2.66945e-30
strand1	stop1	2.66945e-30	2.66945e-30
strand1	protlength1	2.04799e-99	2.04799e-99
strand1	pH1	2.45808e-41	2.45808e-41
strand1	kDa1	1.52629e-91	1.52629e-91
strand1	G1	8.31538e-253	8.31538e-253
strand1	A1	1.4638e-70	1.4638e-70
strand1	L1	3.43685e-122	3.43685e-122
strand1	M1	1.64235e-261	1.64235e-261
strand1	F1	3.71457821103637e-317	3.71457821103637e-317
strand1	W1	0.133399	0.133399
strand1	K1	6.29703e-255	6.29703e-255
strand1	Q1	9.94247e-45	9.94247e-45
strand1	E1	1.111e-110	1.111e-110
strand1	S1	2.11644e-59	2.11644e-59
strand1	P1	6.52654e-157	6.52654e-157
strand1	V1	2.35049e-81	2.35049e-81
strand1	I1	1.06042e-209	1.06042e-209
strand1	C1	4.54003e-71	4.54003e-71
strand1	Y1	1.17185e-276	1.17185e-276
strand1	H1	2.40445e-218	2.40445e-218
strand1	R1	0.000922331	0.000922331
strand1	N1	0.000419277	0.000419277
strand1	D1	8.74151e-211	8.74151e-211
strand1	T1	3.13977e-284	3.13977e-284
strand1	ncont1	4.67132e-12	4.67132e-12
strand1	scont1	1.20764e-280	1.20764e-280
strand1	Number.of.introns1	1.51681e-15	1.51681e-15
strand1	First.intron.length1	1.52205e-15	1.52205e-15
strand1	First.intron.GC1	1.52205e-15	1.52205e-15
strand1	mRNA.half.life.short1	0	0
strand1	Ribosome.occupancy1	8.07925e-73	8.07925e-73
strand1	Ribosome.density..rb.kb.1	4.83054e-285	4.83054e-285
strand1	ORF.length..nt.1	2.04799e-99	2.04799e-99
strand1	mRNA.level1	0.157878	0.157878
strand1	GO.0006350_TRANSCRIPTION1	4.7629e-195	4.7629e-195
strand1	GO.0006412_PROTEIN_BIOSYNTHESIS1	1.66165e-132	1.66165e-132
strand1	GO.0006810_TRANSPORT1	8.99222e-40	8.99222e-40
strand1	GO.0008150_BIOLOGICAL_PROCESS1	1.22817e-34	1.22817e-34
strand1	GO.0016070_RNA_METABOLISM1	3.03381e-05	3.03381e-05
strand1	nuc1	0.496713	0.496713
strand1	cyto1	0	0
strand1	mito1	0.283906	0.283906
strand1	er1	1.37052e-54	1.37052e-54
strand1	MOLECULAR.WEIGHT..in.Daltons.	1.52629e-91	1.52629e-91
strand1	PI	2.45808e-41	2.45808e-41
strand1	CAI..Codon.Adaptation.Index.	0.000156276	0.000156276
strand1	PROTEIN.LENGTH	2.04799e-99	2.04799e-99
strand1	CODON.BIAS	3.85497e-15	3.85497e-15
strand1	ALA	1.52634e-09	1.52634e-09
strand1	ARG	2.20537e-197	2.20537e-197
strand1	ASN	2.06292e-39	2.06292e-39
strand1	ASP	0	0
strand1	CYS	8.56245e-06	8.56245e-06
strand1	GLN	2.2406e-29	2.2406e-29
strand1	GLU	1.12351e-151	1.12351e-151
strand1	GLY	0.0491396	0.0491396
strand1	HIS	8.43452e-06	8.43452e-06
strand1	ILE	1.37971e-253	1.37971e-253
strand1	LEU	5.51723e-210	5.51723e-210
strand1	LYS	2.09847e-253	2.09847e-253
strand1	MET	2.72837e-143	2.72837e-143
strand1	PHE	0.155958	0.155958
strand1	PRO	1.57232e-05	1.57232e-05
strand1	SER	3.86837e-79	3.86837e-79
strand1	THR	6.23718e-190	6.23718e-190
strand1	TRP	8.58227e-24	8.58227e-24
strand1	TYR	5.53147e-10	5.53147e-10
strand1	VAL	6.01221e-81	6.01221e-81
strand1	FOP.SCORE..Frequency.of.Optimal.Codons.	1.25657e-14	1.25657e-14
strand1	GRAVY.SCORE..Hydropathicity.of.Protein.	4.75909e-05	4.75909e-05
strand1	AROMATICITY.SCORE..Frequency.of.aromatic.amino.acids..Phe..Tyr..Trp.	3.89706e-284	3.89706e-284
strand1	econt	0.115701	0.115701
strand1	ccont	8.59483e-21	8.59483e-21
strand1	hcont	8.96119470194894e-317	8.96119470194894e-317
strand1	econtrel	8.58398e-117	8.58398e-117
strand1	ccontrel	9.00516e-71	9.00516e-71
strand1	hcontrel	3.187e-199	3.187e-199
strand1	gene2	0.507494	0.507494
strand1	tfcode2	0.438222	0.438222
strand1	chromosome2	0.498428	0.498428
strand1	strand2	0.508012	0.508012
strand1	start2	0.451234	0.451234
strand1	stop2	0.450774	0.450774
strand1	protlength2	0.456939	0.456939
strand1	pH2	0.463223	0.463223
strand1	kDa2	0.450139	0.450139
strand1	G2	0.437718	0.437718
strand1	A2	0.476589	0.476589
strand1	L2	0.491177	0.491177
strand1	M2	0.449294	0.449294
strand1	F2	0.509515	0.509515
strand1	W2	0.534425	0.534425
strand1	K2	0.494322	0.494322
strand1	Q2	0.464572	0.464572
strand1	E2	0.497424	0.497424
strand1	S2	0.483421	0.483421
strand1	P2	0.439671	0.439671
strand1	V2	0.47903	0.47903
strand1	I2	0.484305	0.484305
strand1	C2	0.478564	0.478564
strand1	Y2	0.472751	0.472751
strand1	H2	0.456387	0.456387
strand1	R2	0.432593	0.432593
strand1	N2	0.473577	0.473577
strand1	D2	0.509315	0.509315
strand1	T2	0.594248	0.594248
strand1	ncont2	0.441191	0.441191
strand1	scont2	0.477151	0.477151
strand1	Number.of.introns2	0.468701	0.468701
strand1	First.intron.length2	0.467532	0.467532
strand1	First.intron.GC2	0.468859	0.468859
strand1	mRNA.half.life.short2	0.503659	0.503659
strand1	Ribosome.occupancy2	0.528688	0.528688
strand1	Ribosome.density..rb.kb.2	0.469237	0.469237
strand1	ORF.length..nt.2	0.465498	0.465498
strand1	mRNA.level2	0.467256	0.467256
strand1	GO.0006350_TRANSCRIPTION2	0.439772	0.439772
strand1	GO.0006412_PROTEIN_BIOSYNTHESIS2	0.469919	0.469919
strand1	GO.0006810_TRANSPORT2	0.535144	0.535144
strand1	GO.0007049_CELL_CYCLE2	0.518646	0.518646
strand1	GO.0007165_SIGNAL_TRANSDUCTION2	0.493407	0.493407
strand1	GO.0008150_BIOLOGICAL_PROCESS2	0.516621	0.516621
strand1	GO.0016070_RNA_METABOLISM2	0.542984	0.542984
strand1	nuc2	0.484294	0.484294
strand1	vac2	0.481114	0.481114
strand1	cyto2	0.413056	0.413056
strand1	mito2	0.495184	0.495184
strand1	relinstems	0.495563	0.495563
strand1	length	0.489386	0.489386
strand1	relnostems	0.515399	0.515399
strand1	nstems	0.501079	0.501079
strand1	cs3	0.495705	0.495705
strand1	cs5	0.495152	0.495152
strand1	csorf	0.517087	0.517087
strand1	lu3	0.468255	0.468255
strand1	u3A	0.529459	0.529459
strand1	u3C	0.459889	0.459889
strand1	u3T	0.514282	0.514282
strand1	u3G	0.504344	0.504344
strand1	u3AC	0.401524	0.401524
strand1	u3AT	0.50374	0.50374
strand1	u3AG	0.554772	0.554772
strand1	u3CT	0.54919	0.54919
strand1	u3CG	0.520182	0.520182
strand1	u3TG	0.367916	0.367916
strand1	X3AUel	0.465882	0.465882
strand1	lu5	0.490365	0.490365
strand1	u5A	0.484199	0.484199
strand1	u5C	0.476183	0.476183
strand1	u5T	0.448087	0.448087
strand1	u5G	0.46545	0.46545
strand1	u5AC	0.426003	0.426003
strand1	u5AT	0.524408	0.524408
strand1	u5AG	0.494637	0.494637
strand1	u5CT	0.439557	0.439557
strand1	u5CG	0.589988	0.589988
strand1	u5TG	0.503666	0.503666
strand1	X5AUel	0.486453	0.486453
strand1	lcds	0.456939	0.456939
strand1	cdsA	0.443071	0.443071
strand1	cdsC	0.489429	0.489429
strand1	cdsT	0.491563	0.491563
strand1	cdsG	0.413122	0.413122
strand1	cdsAC	0.535988	0.535988
strand1	cdsAT	0.509782	0.509782
strand1	cdsAG	0.50213	0.50213
strand1	cdsCT	0.500128	0.500128
strand1	cdsCG	0.455773	0.455773
strand1	cdsTG	0.534394	0.534394
strand1	cdsAUel	0.458143	0.458143
strand1	ene	0.478536	0.478536
strand1	halflife	0.509223	0.509223
strand1	nostems	0.470922	0.470922
strand1	relstems	0.525594	0.525594
strand1	length.1	0.468782	0.468782
strand1	lu3.1	0.468255	0.468255
strand1	lu5.1	0.490365	0.490365
strand1	lorf.1	0.456939	0.456939
strand1	relnostems.1	0.458466	0.458466
strand1	X3stems	0.531978	0.531978
strand1	X5stems	0.447289	0.447289
strand1	orfstems	0.492354	0.492354
strand1	c3	0.481144	0.481144
strand1	c5	0.518924	0.518924
strand1	co	0.470969	0.470969
strand1	orflength	0.468782	0.468782
strand1	score	0.485895	0.485895
strand1	gen	0.519957	0.519957
strand1	lu3rel	0.511023	0.511023
strand1	lu5rel	0.480609	0.480609
start1	stop1	0	0
start1	protlength1	3.56896e-221	3.56896e-221
start1	pH1	1.22264e-37	1.22264e-37
start1	kDa1	1.73808e-214	1.73808e-214
start1	G1	1.06142e-50	1.06142e-50
start1	A1	6.30801e-125	6.30801e-125
start1	L1	2.5299e-77	2.5299e-77
start1	M1	1.6212e-58	1.6212e-58
start1	F1	0.457071	0.457071
start1	W1	0.657365	0.657365
start1	K1	1.33781e-09	1.33781e-09
start1	Q1	2.37994e-44	2.37994e-44
start1	E1	1.09235e-165	1.09235e-165
start1	S1	2.7817e-96	2.7817e-96
start1	P1	0.0411386	0.0411386
start1	V1	3.4302e-55	3.4302e-55
start1	I1	8.70398e-262	8.70398e-262
start1	C1	0	0
start1	Y1	0.00460471	0.00460471
start1	H1	0.000487675	0.000487675
start1	R1	2.55639e-75	2.55639e-75
start1	N1	4.09159e-52	4.09159e-52
start1	D1	0.611387	0.611387
start1	T1	0	0
start1	ncont1	8.26654e-200	8.26654e-200
start1	scont1	2.26968e-77	2.26968e-77
start1	Number.of.introns1	3.77368e-16	3.77368e-16
start1	First.intron.length1	3.50811e-16	3.50811e-16
start1	First.intron.GC1	6.4714e-16	6.4714e-16
start1	mRNA.half.life.short1	6.15134e-11	6.15134e-11
start1	Ribosome.occupancy1	2.50343e-160	2.50343e-160
start1	Ribosome.density..rb.kb.1	1.47886e-222	1.47886e-222
start1	ORF.length..nt.1	1.50544e-221	1.50544e-221
start1	mRNA.level1	4.63002e-40	4.63002e-40
start1	GO.0006350_TRANSCRIPTION1	4.57872e-308	4.57872e-308
start1	GO.0006412_PROTEIN_BIOSYNTHESIS1	0.000250359	0.000250359
start1	GO.0006810_TRANSPORT1	4.49079e-117	4.49079e-117
start1	GO.0008150_BIOLOGICAL_PROCESS1	9.81803e-43	9.81803e-43
start1	GO.0016070_RNA_METABOLISM1	0.0357657	0.0357657
start1	nuc1	0.0958184	0.0958184
start1	cyto1	1.50899e-14	1.50899e-14
start1	mito1	0.842969	0.842969
start1	er1	0.00974067	0.00974067
start1	MOLECULAR.WEIGHT..in.Daltons.	1.73808e-214	1.73808e-214
start1	PI	1.22264e-37	1.22264e-37
start1	CAI..Codon.Adaptation.Index.	1.72207e-233	1.72207e-233
start1	PROTEIN.LENGTH	3.56896e-221	3.56896e-221
start1	CODON.BIAS	1.3691e-281	1.3691e-281
start1	ALA	1.91651e-304	1.91651e-304
start1	ARG	2.13614e-38	2.13614e-38
start1	ASN	5.23183e-221	5.23183e-221
start1	ASP	1.35762e-153	1.35762e-153
start1	CYS	0	0
start1	GLN	0.000319062	0.000319062
start1	GLU	0.185909	0.185909
start1	GLY	0.00205874	0.00205874
start1	HIS	2.23305e-133	2.23305e-133
start1	ILE	0	0
start1	LEU	1.16477e-160	1.16477e-160
start1	LYS	3.34495e-52	3.34495e-52
start1	MET	6.25931e-60	6.25931e-60
start1	PHE	1.02023e-133	1.02023e-133
start1	PRO	2.14204e-82	2.14204e-82
start1	SER	2.36279e-192	2.36279e-192
start1	THR	0	0
start1	TRP	1.35062e-56	1.35062e-56
start1	TYR	3.90114e-163	3.90114e-163
start1	VAL	6.83653e-198	6.83653e-198
start1	FOP.SCORE..Frequency.of.Optimal.Codons.	3.02526e-281	3.02526e-281
start1	GRAVY.SCORE..Hydropathicity.of.Protein.	0	0
start1	AROMATICITY.SCORE..Frequency.of.aromatic.amino.acids..Phe..Tyr..Trp.	0.0614701	0.0614701
start1	econt	6.01578e-63	6.01578e-63
start1	ccont	7.32692e-204	7.32692e-204
start1	hcont	9.63458e-110	9.63458e-110
start1	econtrel	1.78625e-23	1.78625e-23
start1	ccontrel	2.21792e-07	2.21792e-07
start1	hcontrel	9.25445e-25	9.25445e-25
start1	gene2	0.523459	0.523459
start1	tfcode2	0.522546	0.522546
start1	chromosome2	0.518452	0.518452
start1	strand2	0.468064	0.468064
start1	start2	0.461642	0.461642
start1	stop2	0.460073	0.460073
start1	protlength2	0.470436	0.470436
start1	pH2	0.542783	0.542783
start1	kDa2	0.470866	0.470866
start1	G2	0.539792	0.539792
start1	A2	0.40868	0.40868
start1	L2	0.521194	0.521194
start1	M2	0.50904	0.50904
start1	F2	0.537981	0.537981
start1	W2	0.501254	0.501254
start1	K2	0.472977	0.472977
start1	Q2	0.437471	0.437471
start1	E2	0.465661	0.465661
start1	S2	0.438126	0.438126
start1	P2	0.52265	0.52265
start1	V2	0.521436	0.521436
start1	I2	0.502874	0.502874
start1	C2	0.458697	0.458697
start1	Y2	0.505079	0.505079
start1	H2	0.569912	0.569912
start1	R2	0.586914	0.586914
start1	N2	0.558249	0.558249
start1	D2	0.439836	0.439836
start1	T2	0.413702	0.413702
start1	ncont2	0.542098	0.542098
start1	scont2	0.552987	0.552987
start1	Number.of.introns2	0.505695	0.505695
start1	First.intron.length2	0.502307	0.502307
start1	First.intron.GC2	0.510165	0.510165
start1	mRNA.half.life.short2	0.502681	0.502681
start1	Ribosome.occupancy2	0.561822	0.561822
start1	Ribosome.density..rb.kb.2	0.535305	0.535305
start1	ORF.length..nt.2	0.48397	0.48397
start1	mRNA.level2	0.471931	0.471931
start1	GO.0006350_TRANSCRIPTION2	0.454418	0.454418
start1	GO.0006412_PROTEIN_BIOSYNTHESIS2	0.568051	0.568051
start1	GO.0006810_TRANSPORT2	0.478385	0.478385
start1	GO.0007049_CELL_CYCLE2	0.453424	0.453424
start1	GO.0007165_SIGNAL_TRANSDUCTION2	0.574672	0.574672
start1	GO.0008150_BIOLOGICAL_PROCESS2	0.593824	0.593824
start1	GO.0016070_RNA_METABOLISM2	0.489851	0.489851
start1	nuc2	0.534002	0.534002
start1	vac2	0.498647	0.498647
start1	cyto2	0.430967	0.430967
start1	mito2	0.505297	0.505297
start1	relinstems	0.478503	0.478503
start1	length	0.469596	0.469596
start1	relnostems	0.584476	0.584476
start1	nstems	0.461508	0.461508
start1	cs3	0.431135	0.431135
start1	cs5	0.437298	0.437298
start1	csorf	0.471438	0.471438
start1	lu3	0.556643	0.556643
start1	u3A	0.482608	0.482608
start1	u3C	0.466297	0.466297
start1	u3T	0.426447	0.426447
start1	u3G	0.439825	0.439825
start1	u3AC	0.463271	0.463271
start1	u3AT	0.43552	0.43552
start1	u3AG	0.489086	0.489086
start1	u3CT	0.4823	0.4823
start1	u3CG	0.581764	0.581764
start1	u3TG	0.559368	0.559368
start1	X3AUel	0.562153	0.562153
start1	lu5	0.458426	0.458426
start1	u5A	0.567687	0.567687
start1	u5C	0.55962	0.55962
start1	u5T	0.529853	0.529853
start1	u5G	0.475699	0.475699
start1	u5AC	0.551656	0.551656
start1	u5AT	0.462495	0.462495
start1	u5AG	0.542108	0.542108
start1	u5CT	0.483979	0.483979
start1	u5CG	0.376541	0.376541
start1	u5TG	0.443024	0.443024
start1	X5AUel	0.453966	0.453966
start1	lcds	0.470436	0.470436
start1	cdsA	0.560906	0.560906
start1	cdsC	0.407256	0.407256
start1	cdsT	0.508816	0.508816
start1	cdsG	0.553567	0.553567
start1	cdsAC	0.534005	0.534005
start1	cdsAT	0.484529	0.484529
start1	cdsAG	0.522871	0.522871
start1	cdsCT	0.460278	0.460278
start1	cdsCG	0.461844	0.461844
start1	cdsTG	0.513889	0.513889
start1	cdsAUel	0.470012	0.470012
start1	ene	0.475245	0.475245
start1	halflife	0.422608	0.422608
start1	nostems	0.473819	0.473819
start1	relstems	0.505095	0.505095
start1	length.1	0.480548	0.480548
start1	lu3.1	0.556643	0.556643
start1	lu5.1	0.458426	0.458426
start1	lorf.1	0.470436	0.470436
start1	relnostems.1	0.497562	0.497562
start1	X3stems	0.420625	0.420625
start1	X5stems	0.493609	0.493609
start1	orfstems	0.568735	0.568735
start1	c3	0.448051	0.448051
start1	c5	0.495191	0.495191
start1	co	0.483319	0.483319
start1	orflength	0.480548	0.480548
start1	score	0.497577	0.497577
start1	gen	0.45336	0.45336
start1	lu3rel	0.467992	0.467992
start1	lu5rel	0.484924	0.484924
stop1	protlength1	3.56896e-221	3.56896e-221
stop1	pH1	1.22264e-37	1.22264e-37
stop1	kDa1	1.73808e-214	1.73808e-214
stop1	G1	1.06142e-50	1.06142e-50
stop1	A1	6.30801e-125	6.30801e-125
stop1	L1	2.5299e-77	2.5299e-77
stop1	M1	1.6212e-58	1.6212e-58
stop1	F1	0.457071	0.457071
stop1	W1	0.657365	0.657365
stop1	K1	1.33781e-09	1.33781e-09
stop1	Q1	2.37994e-44	2.37994e-44
stop1	E1	1.09235e-165	1.09235e-165
stop1	S1	2.7817e-96	2.7817e-96
stop1	P1	0.0411386	0.0411386
stop1	V1	3.4302e-55	3.4302e-55
stop1	I1	8.70398e-262	8.70398e-262
stop1	C1	0	0
stop1	Y1	0.00460471	0.00460471
stop1	H1	0.000487675	0.000487675
stop1	R1	2.55639e-75	2.55639e-75
stop1	N1	4.09159e-52	4.09159e-52
stop1	D1	0.611387	0.611387
stop1	T1	0	0
stop1	ncont1	8.26654e-200	8.26654e-200
stop1	scont1	2.26968e-77	2.26968e-77
stop1	Number.of.introns1	3.77368e-16	3.77368e-16
stop1	First.intron.length1	3.50811e-16	3.50811e-16
stop1	First.intron.GC1	6.4714e-16	6.4714e-16
stop1	mRNA.half.life.short1	6.15134e-11	6.15134e-11
stop1	Ribosome.occupancy1	2.50343e-160	2.50343e-160
stop1	Ribosome.density..rb.kb.1	1.47886e-222	1.47886e-222
stop1	ORF.length..nt.1	1.50544e-221	1.50544e-221
stop1	mRNA.level1	4.63002e-40	4.63002e-40
stop1	GO.0006350_TRANSCRIPTION1	4.57872e-308	4.57872e-308
stop1	GO.0006412_PROTEIN_BIOSYNTHESIS1	0.000250359	0.000250359
stop1	GO.0006810_TRANSPORT1	4.49079e-117	4.49079e-117
stop1	GO.0008150_BIOLOGICAL_PROCESS1	9.81803e-43	9.81803e-43
stop1	GO.0016070_RNA_METABOLISM1	0.0357657	0.0357657
stop1	nuc1	0.0958184	0.0958184
stop1	cyto1	1.50899e-14	1.50899e-14
stop1	mito1	0.842969	0.842969
stop1	er1	0.00974067	0.00974067
stop1	MOLECULAR.WEIGHT..in.Daltons.	1.73808e-214	1.73808e-214
stop1	PI	1.22264e-37	1.22264e-37
stop1	CAI..Codon.Adaptation.Index.	1.72207e-233	1.72207e-233
stop1	PROTEIN.LENGTH	3.56896e-221	3.56896e-221
stop1	CODON.BIAS	1.3691e-281	1.3691e-281
stop1	ALA	1.91651e-304	1.91651e-304
stop1	ARG	2.13614e-38	2.13614e-38
stop1	ASN	5.23183e-221	5.23183e-221
stop1	ASP	1.35762e-153	1.35762e-153
stop1	CYS	0	0
stop1	GLN	0.000319062	0.000319062
stop1	GLU	0.185909	0.185909
stop1	GLY	0.00205874	0.00205874
stop1	HIS	2.23305e-133	2.23305e-133
stop1	ILE	0	0
stop1	LEU	1.16477e-160	1.16477e-160
stop1	LYS	3.34495e-52	3.34495e-52
stop1	MET	6.25931e-60	6.25931e-60
stop1	PHE	1.02023e-133	1.02023e-133
stop1	PRO	2.14204e-82	2.14204e-82
stop1	SER	2.36279e-192	2.36279e-192
stop1	THR	0	0
stop1	TRP	1.35062e-56	1.35062e-56
stop1	TYR	3.90114e-163	3.90114e-163
stop1	VAL	6.83653e-198	6.83653e-198
stop1	FOP.SCORE..Frequency.of.Optimal.Codons.	3.02526e-281	3.02526e-281
stop1	GRAVY.SCORE..Hydropathicity.of.Protein.	0	0
stop1	AROMATICITY.SCORE..Frequency.of.aromatic.amino.acids..Phe..Tyr..Trp.	0.0614701	0.0614701
stop1	econt	6.01578e-63	6.01578e-63
stop1	ccont	7.32692e-204	7.32692e-204
stop1	hcont	9.63458e-110	9.63458e-110
stop1	econtrel	1.78625e-23	1.78625e-23
stop1	ccontrel	2.21792e-07	2.21792e-07
stop1	hcontrel	9.25445e-25	9.25445e-25
stop1	gene2	0.523459	0.523459
stop1	tfcode2	0.522546	0.522546
stop1	chromosome2	0.518452	0.518452
stop1	strand2	0.468064	0.468064
stop1	start2	0.461642	0.461642
stop1	stop2	0.460073	0.460073
stop1	protlength2	0.470436	0.470436
stop1	pH2	0.542783	0.542783
stop1	kDa2	0.470866	0.470866
stop1	G2	0.539792	0.539792
stop1	A2	0.40868	0.40868
stop1	L2	0.521194	0.521194
stop1	M2	0.50904	0.50904
stop1	F2	0.537981	0.537981
stop1	W2	0.501254	0.501254
stop1	K2	0.472977	0.472977
stop1	Q2	0.437471	0.437471
stop1	E2	0.465661	0.465661
stop1	S2	0.438126	0.438126
stop1	P2	0.52265	0.52265
stop1	V2	0.521436	0.521436
stop1	I2	0.502874	0.502874
stop1	C2	0.458697	0.458697
stop1	Y2	0.505079	0.505079
stop1	H2	0.569912	0.569912
stop1	R2	0.586914	0.586914
stop1	N2	0.558249	0.558249
stop1	D2	0.439836	0.439836
stop1	T2	0.413702	0.413702
stop1	ncont2	0.542098	0.542098
stop1	scont2	0.552987	0.552987
stop1	Number.of.introns2	0.505695	0.505695
stop1	First.intron.length2	0.502307	0.502307
stop1	First.intron.GC2	0.510165	0.510165
stop1	mRNA.half.life.short2	0.502681	0.502681
stop1	Ribosome.occupancy2	0.561822	0.561822
stop1	Ribosome.density..rb.kb.2	0.535305	0.535305
stop1	ORF.length..nt.2	0.48397	0.48397
stop1	mRNA.level2	0.471931	0.471931
stop1	GO.0006350_TRANSCRIPTION2	0.454418	0.454418
stop1	GO.0006412_PROTEIN_BIOSYNTHESIS2	0.568051	0.568051
stop1	GO.0006810_TRANSPORT2	0.478385	0.478385
stop1	GO.0007049_CELL_CYCLE2	0.453424	0.453424
stop1	GO.0007165_SIGNAL_TRANSDUCTION2	0.574672	0.574672
stop1	GO.0008150_BIOLOGICAL_PROCESS2	0.593824	0.593824
stop1	GO.0016070_RNA_METABOLISM2	0.489851	0.489851
stop1	nuc2	0.534002	0.534002
stop1	vac2	0.498647	0.498647
stop1	cyto2	0.430967	0.430967
stop1	mito2	0.505297	0.505297
stop1	relinstems	0.478503	0.478503
stop1	length	0.469596	0.469596
stop1	relnostems	0.584476	0.584476
stop1	nstems	0.461508	0.461508
stop1	cs3	0.431135	0.431135
stop1	cs5	0.437298	0.437298
stop1	csorf	0.471438	0.471438
stop1	lu3	0.556643	0.556643
stop1	u3A	0.482608	0.482608
stop1	u3C	0.466297	0.466297
stop1	u3T	0.426447	0.426447
stop1	u3G	0.439825	0.439825
stop1	u3AC	0.463271	0.463271
stop1	u3AT	0.43552	0.43552
stop1	u3AG	0.489086	0.489086
stop1	u3CT	0.4823	0.4823
stop1	u3CG	0.581764	0.581764
stop1	u3TG	0.559368	0.559368
stop1	X3AUel	0.562153	0.562153
stop1	lu5	0.458426	0.458426
stop1	u5A	0.567687	0.567687
stop1	u5C	0.55962	0.55962
stop1	u5T	0.529853	0.529853
stop1	u5G	0.475699	0.475699
stop1	u5AC	0.551656	0.551656
stop1	u5AT	0.462495	0.462495
stop1	u5AG	0.542108	0.542108
stop1	u5CT	0.483979	0.483979
stop1	u5CG	0.376541	0.376541
stop1	u5TG	0.443024	0.443024
stop1	X5AUel	0.453966	0.453966
stop1	lcds	0.470436	0.470436
stop1	cdsA	0.560906	0.560906
stop1	cdsC	0.407256	0.407256
stop1	cdsT	0.508816	0.508816
stop1	cdsG	0.553567	0.553567
stop1	cdsAC	0.534005	0.534005
stop1	cdsAT	0.484529	0.484529
stop1	cdsAG	0.522871	0.522871
stop1	cdsCT	0.460278	0.460278
stop1	cdsCG	0.461844	0.461844
stop1	cdsTG	0.513889	0.513889
stop1	cdsAUel	0.470012	0.470012
stop1	ene	0.475245	0.475245
stop1	halflife	0.422608	0.422608
stop1	nostems	0.473819	0.473819
stop1	relstems	0.505095	0.505095
stop1	length.1	0.480548	0.480548
stop1	lu3.1	0.556643	0.556643
stop1	lu5.1	0.458426	0.458426
stop1	lorf.1	0.470436	0.470436
stop1	relnostems.1	0.497562	0.497562
stop1	X3stems	0.420625	0.420625
stop1	X5stems	0.493609	0.493609
stop1	orfstems	0.568735	0.568735
stop1	c3	0.448051	0.448051
stop1	c5	0.495191	0.495191
stop1	co	0.483319	0.483319
stop1	orflength	0.480548	0.480548
stop1	score	0.497577	0.497577
stop1	gen	0.45336	0.45336
stop1	lu3rel	0.467992	0.467992
stop1	lu5rel	0.484924	0.484924
protlength1	pH1	4.61882e-59	4.61882e-59
protlength1	kDa1	0	0
protlength1	G1	5.46703e-223	5.46703e-223
protlength1	A1	3.3047e-142	3.3047e-142
protlength1	L1	4.36646e-255	4.36646e-255
protlength1	M1	6.40048e-23	6.40048e-23
protlength1	F1	4.73235e-23	4.73235e-23
protlength1	W1	1.70544e-06	1.70544e-06
protlength1	K1	8.15926e-151	8.15926e-151
protlength1	Q1	2.28226e-14	2.28226e-14
protlength1	E1	5.0174e-25	5.0174e-25
protlength1	S1	1.04328e-16	1.04328e-16
protlength1	P1	9.89913e-11	9.89913e-11
protlength1	V1	2.02928e-148	2.02928e-148
protlength1	I1	6.20506e-198	6.20506e-198
protlength1	C1	2.93981e-12	2.93981e-12
protlength1	Y1	0.0723007	0.0723007
protlength1	H1	3.25719e-12	3.25719e-12
protlength1	R1	0	0
protlength1	N1	1.30234e-09	1.30234e-09
protlength1	D1	6.09816e-25	6.09816e-25
protlength1	T1	0	0
protlength1	ncont1	9.88885e-251	9.88885e-251
protlength1	scont1	7.71179e-13	7.71179e-13
protlength1	Number.of.introns1	1.42247e-06	1.42247e-06
protlength1	First.intron.length1	1.49611e-06	1.49611e-06
protlength1	First.intron.GC1	1.87044e-06	1.87044e-06
protlength1	mRNA.half.life.short1	3.62995e-91	3.62995e-91
protlength1	Ribosome.occupancy1	1.20013e-116	1.20013e-116
protlength1	Ribosome.density..rb.kb.1	1.42511e-164	1.42511e-164
protlength1	ORF.length..nt.1	0	0
protlength1	mRNA.level1	9.26055e-05	9.26055e-05
protlength1	GO.0006350_TRANSCRIPTION1	0	0
protlength1	GO.0006412_PROTEIN_BIOSYNTHESIS1	1.46607e-54	1.46607e-54
protlength1	GO.0006810_TRANSPORT1	2.73281e-173	2.73281e-173
protlength1	GO.0008150_BIOLOGICAL_PROCESS1	2.57077e-26	2.57077e-26
protlength1	GO.0016070_RNA_METABOLISM1	0.624911	0.624911
protlength1	nuc1	4.08615e-87	4.08615e-87
protlength1	cyto1	0.00532171	0.00532171
protlength1	mito1	0.0911668	0.0911668
protlength1	er1	2.07547e-271	2.07547e-271
protlength1	MOLECULAR.WEIGHT..in.Daltons.	0	0
protlength1	PI	4.61882e-59	4.61882e-59
protlength1	CAI..Codon.Adaptation.Index.	6.11302e-08	6.11302e-08
protlength1	PROTEIN.LENGTH	0	0
protlength1	CODON.BIAS	8.93619e-19	8.93619e-19
protlength1	ALA	0	0
protlength1	ARG	1.9637e-171	1.9637e-171
protlength1	ASN	0	0
protlength1	ASP	0	0
protlength1	CYS	8.0179413691408e-317	8.01794136914079e-317
protlength1	GLN	3.13806e-60	3.13806e-60
protlength1	GLU	1.77608e-218	1.77608e-218
protlength1	GLY	6.32915e-113	6.32915e-113
protlength1	HIS	0	0
protlength1	ILE	0	0
protlength1	LEU	0	0
protlength1	LYS	0	0
protlength1	MET	3.19325e-149	3.19325e-149
protlength1	PHE	0	0
protlength1	PRO	0	0
protlength1	SER	0	0
protlength1	THR	0	0
protlength1	TRP	2.71342e-77	2.71342e-77
protlength1	TYR	0	0
protlength1	VAL	0	0
protlength1	FOP.SCORE..Frequency.of.Optimal.Codons.	2.44424e-17	2.44424e-17
protlength1	GRAVY.SCORE..Hydropathicity.of.Protein.	0	0
protlength1	AROMATICITY.SCORE..Frequency.of.aromatic.amino.acids..Phe..Tyr..Trp.	3.42297e-29	3.42297e-29
protlength1	econt	1.89258e-193	1.89258e-193
protlength1	ccont	0	0
protlength1	hcont	0	0
protlength1	econtrel	5.26991e-08	5.26991e-08
protlength1	ccontrel	1.0078e-107	1.0078e-107
protlength1	hcontrel	2.45644e-245	2.45644e-245
protlength1	gene2	0.498196	0.498196
protlength1	tfcode2	0.505337	0.505337
protlength1	chromosome2	0.49618	0.49618
protlength1	strand2	0.499026	0.499026
protlength1	start2	0.49985	0.49985
protlength1	stop2	0.49994	0.49994
protlength1	protlength2	0.458058	0.458058
protlength1	pH2	0.462331	0.462331
protlength1	kDa2	0.459498	0.459498
protlength1	G2	0.429484	0.429484
protlength1	A2	0.484523	0.484523
protlength1	L2	0.520551	0.520551
protlength1	M2	0.478633	0.478633
protlength1	F2	0.57122	0.57122
protlength1	W2	0.460403	0.460403
protlength1	K2	0.511934	0.511934
protlength1	Q2	0.529396	0.529396
protlength1	E2	0.501764	0.501764
protlength1	S2	0.512762	0.512762
protlength1	P2	0.581127	0.581127
protlength1	V2	0.454955	0.454955
protlength1	I2	0.506508	0.506508
protlength1	C2	0.467128	0.467128
protlength1	Y2	0.446242	0.446242
protlength1	H2	0.501253	0.501253
protlength1	R2	0.543943	0.543943
protlength1	N2	0.492975	0.492975
protlength1	D2	0.4605	0.4605
protlength1	T2	0.510221	0.510221
protlength1	ncont2	0.54946	0.54946
protlength1	scont2	0.451197	0.451197
protlength1	Number.of.introns2	0.506295	0.506295
protlength1	First.intron.length2	0.508263	0.508263
protlength1	First.intron.GC2	0.503651	0.503651
protlength1	mRNA.half.life.short2	0.474382	0.474382
protlength1	Ribosome.occupancy2	0.462899	0.462899
protlength1	Ribosome.density..rb.kb.2	0.530466	0.530466
protlength1	ORF.length..nt.2	0.445529	0.445529
protlength1	mRNA.level2	0.544542	0.544542
protlength1	GO.0006350_TRANSCRIPTION2	0.507656	0.507656
protlength1	GO.0006412_PROTEIN_BIOSYNTHESIS2	0.528039	0.528039
protlength1	GO.0006810_TRANSPORT2	0.496909	0.496909
protlength1	GO.0007049_CELL_CYCLE2	0.499867	0.499867
protlength1	GO.0007165_SIGNAL_TRANSDUCTION2	0.427663	0.427663
protlength1	GO.0008150_BIOLOGICAL_PROCESS2	0.55869	0.55869
protlength1	GO.0016070_RNA_METABOLISM2	0.503194	0.503194
protlength1	nuc2	0.560277	0.560277
protlength1	vac2	0.486445	0.486445
protlength1	cyto2	0.428009	0.428009
protlength1	mito2	0.553226	0.553226
protlength1	relinstems	0.489379	0.489379
protlength1	length	0.418289	0.418289
protlength1	relnostems	0.537473	0.537473
protlength1	nstems	0.414267	0.414267
protlength1	cs3	0.459177	0.459177
protlength1	cs5	0.547137	0.547137
protlength1	csorf	0.432822	0.432822
protlength1	lu3	0.463562	0.463562
protlength1	u3A	0.529855	0.529855
protlength1	u3C	0.4434	0.4434
protlength1	u3T	0.515204	0.515204
protlength1	u3G	0.559038	0.559038
protlength1	u3AC	0.435892	0.435892
protlength1	u3AT	0.48449	0.48449
protlength1	u3AG	0.513017	0.513017
protlength1	u3CT	0.506559	0.506559
protlength1	u3CG	0.514796	0.514796
protlength1	u3TG	0.461535	0.461535
protlength1	X3AUel	0.464784	0.464784
protlength1	lu5	0.551689	0.551689
protlength1	u5A	0.489457	0.489457
protlength1	u5C	0.506282	0.506282
protlength1	u5T	0.503206	0.503206
protlength1	u5G	0.488361	0.488361
protlength1	u5AC	0.546981	0.546981
protlength1	u5AT	0.476338	0.476338
protlength1	u5AG	0.491122	0.491122
protlength1	u5CT	0.497669	0.497669
protlength1	u5CG	0.431309	0.431309
protlength1	u5TG	0.464341	0.464341
protlength1	X5AUel	0.550949	0.550949
protlength1	lcds	0.458058	0.458058
protlength1	cdsA	0.526216	0.526216
protlength1	cdsC	0.543066	0.543066
protlength1	cdsT	0.503247	0.503247
protlength1	cdsG	0.519653	0.519653
protlength1	cdsAC	0.520444	0.520444
protlength1	cdsAT	0.522495	0.522495
protlength1	cdsAG	0.549624	0.549624
protlength1	cdsCT	0.518547	0.518547
protlength1	cdsCG	0.442054	0.442054
protlength1	cdsTG	0.462989	0.462989
protlength1	cdsAUel	0.458952	0.458952
protlength1	ene	0.438813	0.438813
protlength1	halflife	0.461298	0.461298
protlength1	nostems	0.437588	0.437588
protlength1	relstems	0.505619	0.505619
protlength1	length.1	0.437019	0.437019
protlength1	lu3.1	0.463562	0.463562
protlength1	lu5.1	0.551689	0.551689
protlength1	lorf.1	0.458058	0.458058
protlength1	relnostems.1	0.57498	0.57498
protlength1	X3stems	0.446475	0.446475
protlength1	X5stems	0.537569	0.537569
protlength1	orfstems	0.549003	0.549003
protlength1	c3	0.451636	0.451636
protlength1	c5	0.515577	0.515577
protlength1	co	0.446784	0.446784
protlength1	orflength	0.437019	0.437019
protlength1	score	0.492413	0.492413
protlength1	gen	0.480644	0.480644
protlength1	lu3rel	0.451206	0.451206
protlength1	lu5rel	0.47468	0.47468
pH1	kDa1	4.74335e-62	4.74335e-62
pH1	G1	8.57408e-295	8.57408e-295
pH1	A1	2.9134e-18	2.9134e-18
pH1	L1	0	0
pH1	M1	9.16706e-121	9.16706e-121
pH1	F1	7.79928e-112	7.79928e-112
pH1	W1	2.99013e-210	2.99013e-210
pH1	K1	2.30008e-230	2.30008e-230
pH1	Q1	0.00567629	0.00567629
pH1	E1	0.00953613	0.00953613
pH1	S1	2.4369e-47	2.4369e-47
pH1	P1	4.57385e-94	4.57385e-94
pH1	V1	8.74677e-26	8.74677e-26
pH1	I1	5.54693e-130	5.54693e-130
pH1	C1	0.284992	0.284992
pH1	Y1	6.81468e-06	6.81468e-06
pH1	H1	2.88834e-08	2.88834e-08
pH1	R1	1.56293e-10	1.56293e-10
pH1	N1	0.00120864	0.00120864
pH1	D1	6.76043e-11	6.76043e-11
pH1	T1	5.28014e-213	5.28014e-213
pH1	ncont1	7.17726e-43	7.17726e-43
pH1	scont1	4.74193e-74	4.74193e-74
pH1	Number.of.introns1	4.56508e-22	4.56508e-22
pH1	First.intron.length1	3.41012e-22	3.41012e-22
pH1	First.intron.GC1	3.83691e-22	3.83691e-22
pH1	mRNA.half.life.short1	6.8664e-106	6.8664e-106
pH1	Ribosome.occupancy1	8.66827e-08	8.66827e-08
pH1	Ribosome.density..rb.kb.1	4.0238e-101	4.0238e-101
pH1	ORF.length..nt.1	7.95237e-58	7.95237e-58
pH1	mRNA.level1	6.38575e-05	6.38575e-05
pH1	GO.0006350_TRANSCRIPTION1	0.00509586	0.00509586
pH1	GO.0006412_PROTEIN_BIOSYNTHESIS1	4.11295e-14	4.11295e-14
pH1	GO.0006810_TRANSPORT1	3.09815e-23	3.09815e-23
pH1	GO.0008150_BIOLOGICAL_PROCESS1	0.573778	0.573778
pH1	GO.0016070_RNA_METABOLISM1	3.0852e-12	3.0852e-12
pH1	nuc1	0.0077321	0.0077321
pH1	cyto1	1.36245e-13	1.36245e-13
pH1	mito1	0.269505	0.269505
pH1	er1	5.99959e-104	5.99959e-104
pH1	MOLECULAR.WEIGHT..in.Daltons.	4.74335e-62	4.74335e-62
pH1	PI	0	0
pH1	CAI..Codon.Adaptation.Index.	0.0167773	0.0167773
pH1	PROTEIN.LENGTH	4.61882e-59	4.61882e-59
pH1	CODON.BIAS	1.89152e-11	1.89152e-11
pH1	ALA	0.053301	0.053301
pH1	ARG	0.0314958	0.0314958
pH1	ASN	1.48148e-06	1.48148e-06
pH1	ASP	9.73158e-132	9.73158e-132
pH1	CYS	3.17821e-09	3.17821e-09
pH1	GLN	0.185037	0.185037
pH1	GLU	0.373984	0.373984
pH1	GLY	1.21087e-152	1.21087e-152
pH1	HIS	0.361462	0.361462
pH1	ILE	1.58726e-166	1.58726e-166
pH1	LEU	1.48654471520714e-319	1.48654471520714e-319
pH1	LYS	4.88874e-187	4.88874e-187
pH1	MET	1.90136e-126	1.90136e-126
pH1	PHE	2.47383e-52	2.47383e-52
pH1	PRO	9.73984e-13	9.73984e-13
pH1	SER	6.77434e-09	6.77434e-09
pH1	THR	5.68252e-95	5.68252e-95
pH1	TRP	6.59513e-74	6.59513e-74
pH1	TYR	0.855483	0.855483
pH1	VAL	6.74647e-71	6.74647e-71
pH1	FOP.SCORE..Frequency.of.Optimal.Codons.	1.30779e-11	1.30779e-11
pH1	GRAVY.SCORE..Hydropathicity.of.Protein.	2.53889e-63	2.53889e-63
pH1	AROMATICITY.SCORE..Frequency.of.aromatic.amino.acids..Phe..Tyr..Trp.	1.9762e-92	1.9762e-92
pH1	econt	1.99628e-119	1.99628e-119
pH1	ccont	1.57099e-09	1.57099e-09
pH1	hcont	2.93944e-235	2.93944e-235
pH1	econtrel	2.2889e-132	2.2889e-132
pH1	ccontrel	1.17794e-154	1.17794e-154
pH1	hcontrel	0	0
pH1	gene2	0.518874	0.518874
pH1	tfcode2	0.577938	0.577938
pH1	chromosome2	0.516106	0.516106
pH1	strand2	0.483604	0.483604
pH1	start2	0.476679	0.476679
pH1	stop2	0.476323	0.476323
pH1	protlength2	0.454845	0.454845
pH1	pH2	0.502599	0.502599
pH1	kDa2	0.450932	0.450932
pH1	G2	0.548613	0.548613
pH1	A2	0.470909	0.470909
pH1	L2	0.43899	0.43899
pH1	M2	0.414298	0.414298
pH1	F2	0.491515	0.491515
pH1	W2	0.514361	0.514361
pH1	K2	0.536443	0.536443
pH1	Q2	0.508745	0.508745
pH1	E2	0.576857	0.576857
pH1	S2	0.498738	0.498738
pH1	P2	0.494781	0.494781
pH1	V2	0.493554	0.493554
pH1	I2	0.546512	0.546512
pH1	C2	0.51077	0.51077
pH1	Y2	0.533107	0.533107
pH1	H2	0.53569	0.53569
pH1	R2	0.494407	0.494407
pH1	N2	0.576217	0.576217
pH1	D2	0.443703	0.443703
pH1	T2	0.534706	0.534706
pH1	ncont2	0.535832	0.535832
pH1	scont2	0.525611	0.525611
pH1	Number.of.introns2	0.499745	0.499745
pH1	First.intron.length2	0.504848	0.504848
pH1	First.intron.GC2	0.494891	0.494891
pH1	mRNA.half.life.short2	0.429137	0.429137
pH1	Ribosome.occupancy2	0.388835	0.388835
pH1	Ribosome.density..rb.kb.2	0.501655	0.501655
pH1	ORF.length..nt.2	0.460567	0.460567
pH1	mRNA.level2	0.505687	0.505687
pH1	GO.0006350_TRANSCRIPTION2	0.435635	0.435635
pH1	GO.0006412_PROTEIN_BIOSYNTHESIS2	0.475134	0.475134
pH1	GO.0006810_TRANSPORT2	0.436517	0.436517
pH1	GO.0007049_CELL_CYCLE2	0.470663	0.470663
pH1	GO.0007165_SIGNAL_TRANSDUCTION2	0.540697	0.540697
pH1	GO.0008150_BIOLOGICAL_PROCESS2	0.460427	0.460427
pH1	GO.0016070_RNA_METABOLISM2	0.494958	0.494958
pH1	nuc2	0.500135	0.500135
pH1	vac2	0.514295	0.514295
pH1	cyto2	0.539012	0.539012
pH1	mito2	0.441919	0.441919
pH1	relinstems	0.552063	0.552063
pH1	length	0.44886	0.44886
pH1	relnostems	0.606603	0.606603
pH1	nstems	0.451976	0.451976
pH1	cs3	0.518909	0.518909
pH1	cs5	0.491189	0.491189
pH1	csorf	0.585518	0.585518
pH1	lu3	0.560004	0.560004
pH1	u3A	0.521984	0.521984
pH1	u3C	0.442241	0.442241
pH1	u3T	0.476224	0.476224
pH1	u3G	0.449719	0.449719
pH1	u3AC	0.432605	0.432605
pH1	u3AT	0.460197	0.460197
pH1	u3AG	0.472224	0.472224
pH1	u3CT	0.47539	0.47539
pH1	u3CG	0.557851	0.557851
pH1	u3TG	0.474757	0.474757
pH1	X3AUel	0.559592	0.559592
pH1	lu5	0.505745	0.505745
pH1	u5A	0.555242	0.555242
pH1	u5C	0.503193	0.503193
pH1	u5T	0.504096	0.504096
pH1	u5G	0.534831	0.534831
pH1	u5AC	0.557934	0.557934
pH1	u5AT	0.519205	0.519205
pH1	u5AG	0.601928	0.601928
pH1	u5CT	0.57213	0.57213
pH1	u5CG	0.498044	0.498044
pH1	u5TG	0.424358	0.424358
pH1	X5AUel	0.507085	0.507085
pH1	lcds	0.454845	0.454845
pH1	cdsA	0.549217	0.549217
pH1	cdsC	0.499247	0.499247
pH1	cdsT	0.530443	0.530443
pH1	cdsG	0.574976	0.574976
pH1	cdsAC	0.466796	0.466796
pH1	cdsAT	0.477299	0.477299
pH1	cdsAG	0.565141	0.565141
pH1	cdsCT	0.483968	0.483968
pH1	cdsCG	0.47543	0.47543
pH1	cdsTG	0.579002	0.579002
pH1	cdsAUel	0.454009	0.454009
pH1	ene	0.457864	0.457864
pH1	halflife	0.473431	0.473431
pH1	nostems	0.437405	0.437405
pH1	relstems	0.464554	0.464554
pH1	length.1	0.457807	0.457807
pH1	lu3.1	0.560004	0.560004
pH1	lu5.1	0.505745	0.505745
pH1	lorf.1	0.454845	0.454845
pH1	relnostems.1	0.600191	0.600191
pH1	X3stems	0.560781	0.560781
pH1	X5stems	0.501291	0.501291
pH1	orfstems	0.487815	0.487815
pH1	c3	0.603128	0.603128
pH1	c5	0.51274	0.51274
pH1	co	0.424525	0.424525
pH1	orflength	0.457807	0.457807
pH1	score	0.524158	0.524158
pH1	gen	0.472598	0.472598
pH1	lu3rel	0.449134	0.449134
pH1	lu5rel	0.535959	0.535959
kDa1	G1	4.83753e-223	4.83753e-223
kDa1	A1	3.90751e-139	3.90751e-139
kDa1	L1	5.39616e-262	5.39616e-262
kDa1	M1	1.05695e-22	1.05695e-22
kDa1	F1	7.96496e-22	7.96496e-22
kDa1	W1	5.41357e-08	5.41357e-08
kDa1	K1	1.48956e-138	1.48956e-138
kDa1	Q1	1.28336e-11	1.28336e-11
kDa1	E1	4.80873e-25	4.80873e-25
kDa1	S1	1.96455e-12	1.96455e-12
kDa1	P1	4.40058e-08	4.40058e-08
kDa1	V1	1.9918e-153	1.9918e-153
kDa1	I1	8.47415e-196	8.47415e-196
kDa1	C1	6.63753e-11	6.63753e-11
kDa1	Y1	0.741696	0.741696
kDa1	H1	7.7014e-08	7.7014e-08
kDa1	R1	0	0
kDa1	N1	4.08796e-09	4.08796e-09
kDa1	D1	2.30801e-29	2.30801e-29
kDa1	T1	0	0
kDa1	ncont1	2.54225e-228	2.54225e-228
kDa1	scont1	2.29894e-12	2.29894e-12
kDa1	Number.of.introns1	0.000116584	0.000116584
kDa1	First.intron.length1	0.000128511	0.000128511
kDa1	First.intron.GC1	0.000150938	0.000150938
kDa1	mRNA.half.life.short1	2.43918e-101	2.43918e-101
kDa1	Ribosome.occupancy1	1.10401e-99	1.10401e-99
kDa1	Ribosome.density..rb.kb.1	3.79261e-161	3.79261e-161
kDa1	ORF.length..nt.1	0	0
kDa1	mRNA.level1	0.0014665	0.0014665
kDa1	GO.0006350_TRANSCRIPTION1	0	0
kDa1	GO.0006412_PROTEIN_BIOSYNTHESIS1	1.94392e-54	1.94392e-54
kDa1	GO.0006810_TRANSPORT1	3.80021e-150	3.80021e-150
kDa1	GO.0008150_BIOLOGICAL_PROCESS1	2.92632e-26	2.92632e-26
kDa1	GO.0016070_RNA_METABOLISM1	0.865079	0.865079
kDa1	nuc1	2.00676e-78	2.00676e-78
kDa1	cyto1	0.00528575	0.00528575
kDa1	mito1	0.0915307	0.0915307
kDa1	er1	3.45294e-276	3.45294e-276
kDa1	MOLECULAR.WEIGHT..in.Daltons.	0	0
kDa1	PI	4.74335e-62	4.74335e-62
kDa1	CAI..Codon.Adaptation.Index.	8.39723e-09	8.39723e-09
kDa1	PROTEIN.LENGTH	0	0
kDa1	CODON.BIAS	3.12671e-19	3.12671e-19
kDa1	ALA	0	0
kDa1	ARG	1.4303e-173	1.4303e-173
kDa1	ASN	0	0
kDa1	ASP	0	0
kDa1	CYS	1.03308e-306	1.03308e-306
kDa1	GLN	6.7511e-63	6.7511e-63
kDa1	GLU	1.91662e-209	1.91662e-209
kDa1	GLY	6.5664e-118	6.5664e-118
kDa1	HIS	0	0
kDa1	ILE	0	0
kDa1	LEU	0	0
kDa1	LYS	0	0
kDa1	MET	3.22113e-149	3.22113e-149
kDa1	PHE	0	0
kDa1	PRO	0	0
kDa1	SER	0	0
kDa1	THR	0	0
kDa1	TRP	1.26075e-72	1.26075e-72
kDa1	TYR	0	0
kDa1	VAL	0	0
kDa1	FOP.SCORE..Frequency.of.Optimal.Codons.	9.55497e-18	9.55497e-18
kDa1	GRAVY.SCORE..Hydropathicity.of.Protein.	0	0
kDa1	AROMATICITY.SCORE..Frequency.of.aromatic.amino.acids..Phe..Tyr..Trp.	7.22767e-25	7.22767e-25
kDa1	econt	3.88692e-190	3.88692e-190
kDa1	ccont	0	0
kDa1	hcont	0	0
kDa1	econtrel	2.63434e-07	2.63434e-07
kDa1	ccontrel	9.70867e-108	9.70867e-108
kDa1	hcontrel	6.05369e-241	6.05369e-241
kDa1	gene2	0.495117	0.495117
kDa1	tfcode2	0.509567	0.509567
kDa1	chromosome2	0.491671	0.491671
kDa1	strand2	0.503676	0.503676
kDa1	start2	0.498863	0.498863
kDa1	stop2	0.498962	0.498962
kDa1	protlength2	0.453897	0.453897
kDa1	pH2	0.466509	0.466509
kDa1	kDa2	0.457035	0.457035
kDa1	G2	0.430552	0.430552
kDa1	A2	0.483807	0.483807
kDa1	L2	0.524803	0.524803
kDa1	M2	0.478813	0.478813
kDa1	F2	0.566385	0.566385
kDa1	W2	0.459331	0.459331
kDa1	K2	0.506916	0.506916
kDa1	Q2	0.521327	0.521327
kDa1	E2	0.500412	0.500412
kDa1	S2	0.511302	0.511302
kDa1	P2	0.58678	0.58678
kDa1	V2	0.453663	0.453663
kDa1	I2	0.509473	0.509473
kDa1	C2	0.469373	0.469373
kDa1	Y2	0.446502	0.446502
kDa1	H2	0.503844	0.503844
kDa1	R2	0.543751	0.543751
kDa1	N2	0.493537	0.493537
kDa1	D2	0.463497	0.463497
kDa1	T2	0.513593	0.513593
kDa1	ncont2	0.540373	0.540373
kDa1	scont2	0.447213	0.447213
kDa1	Number.of.introns2	0.5103	0.5103
kDa1	First.intron.length2	0.513746	0.513746
kDa1	First.intron.GC2	0.507643	0.507643
kDa1	mRNA.half.life.short2	0.46699	0.46699
kDa1	Ribosome.occupancy2	0.458708	0.458708
kDa1	Ribosome.density..rb.kb.2	0.526718	0.526718
kDa1	ORF.length..nt.2	0.446501	0.446501
kDa1	mRNA.level2	0.549484	0.549484
kDa1	GO.0006350_TRANSCRIPTION2	0.516201	0.516201
kDa1	GO.0006412_PROTEIN_BIOSYNTHESIS2	0.525337	0.525337
kDa1	GO.0006810_TRANSPORT2	0.496792	0.496792
kDa1	GO.0007049_CELL_CYCLE2	0.50568	0.50568
kDa1	GO.0007165_SIGNAL_TRANSDUCTION2	0.423795	0.423795
kDa1	GO.0008150_BIOLOGICAL_PROCESS2	0.5566	0.5566
kDa1	GO.0016070_RNA_METABOLISM2	0.509962	0.509962
kDa1	nuc2	0.563933	0.563933
kDa1	vac2	0.489784	0.489784
kDa1	cyto2	0.431102	0.431102
kDa1	mito2	0.552958	0.552958
kDa1	relinstems	0.498621	0.498621
kDa1	length	0.420604	0.420604
kDa1	relnostems	0.53875	0.53875
kDa1	nstems	0.415994	0.415994
kDa1	cs3	0.461746	0.461746
kDa1	cs5	0.547248	0.547248
kDa1	csorf	0.428518	0.428518
kDa1	lu3	0.462778	0.462778
kDa1	u3A	0.530987	0.530987
kDa1	u3C	0.449214	0.449214
kDa1	u3T	0.511707	0.511707
kDa1	u3G	0.558914	0.558914
kDa1	u3AC	0.437052	0.437052
kDa1	u3AT	0.480095	0.480095
kDa1	u3AG	0.509647	0.509647
kDa1	u3CT	0.504888	0.504888
kDa1	u3CG	0.519971	0.519971
kDa1	u3TG	0.466301	0.466301
kDa1	X3AUel	0.463524	0.463524
kDa1	lu5	0.558076	0.558076
kDa1	u5A	0.491337	0.491337
kDa1	u5C	0.497395	0.497395
kDa1	u5T	0.49581	0.49581
kDa1	u5G	0.482249	0.482249
kDa1	u5AC	0.54364	0.54364
kDa1	u5AT	0.486189	0.486189
kDa1	u5AG	0.496041	0.496041
kDa1	u5CT	0.499827	0.499827
kDa1	u5CG	0.419444	0.419444
kDa1	u5TG	0.467156	0.467156
kDa1	X5AUel	0.557399	0.557399
kDa1	lcds	0.453897	0.453897
kDa1	cdsA	0.524745	0.524745
kDa1	cdsC	0.545946	0.545946
kDa1	cdsT	0.501251	0.501251
kDa1	cdsG	0.520756	0.520756
kDa1	cdsAC	0.517172	0.517172
kDa1	cdsAT	0.524999	0.524999
kDa1	cdsAG	0.549736	0.549736
kDa1	cdsCT	0.521503	0.521503
kDa1	cdsCG	0.434641	0.434641
kDa1	cdsTG	0.463654	0.463654
kDa1	cdsAUel	0.455145	0.455145
kDa1	ene	0.432975	0.432975
kDa1	halflife	0.458133	0.458133
kDa1	nostems	0.432459	0.432459
kDa1	relstems	0.5018	0.5018
kDa1	length.1	0.432185	0.432185
kDa1	lu3.1	0.462778	0.462778
kDa1	lu5.1	0.558076	0.558076
kDa1	lorf.1	0.453897	0.453897
kDa1	relnostems.1	0.57469	0.57469
kDa1	X3stems	0.440924	0.440924
kDa1	X5stems	0.533017	0.533017
kDa1	orfstems	0.558014	0.558014
kDa1	c3	0.458424	0.458424
kDa1	c5	0.520703	0.520703
kDa1	co	0.445979	0.445979
kDa1	orflength	0.432185	0.432185
kDa1	score	0.492156	0.492156
kDa1	gen	0.471973	0.471973
kDa1	lu3rel	0.442427	0.442427
kDa1	lu5rel	0.478882	0.478882
G1	A1	1.8627e-25	1.8627e-25
G1	L1	0	0
G1	M1	2.63506e-61	2.63506e-61
G1	F1	0	0
G1	W1	2.16704e-24	2.16704e-24
G1	K1	0	0
G1	Q1	2.97845e-15	2.97845e-15
G1	E1	0.286117	0.286117
G1	S1	0.404122	0.404122
G1	P1	1.52603e-157	1.52603e-157
G1	V1	4.32317e-263	4.32317e-263
G1	I1	0	0
G1	C1	4.49465e-05	4.49465e-05
G1	Y1	0	0
G1	H1	3.86319e-29	3.86319e-29
G1	R1	3.94586e-213	3.94586e-213
G1	N1	5.56046e-186	5.56046e-186
G1	D1	2.07932e-138	2.07932e-138
G1	T1	0	0
G1	ncont1	0.40549	0.40549
G1	scont1	2.64983e-52	2.64983e-52
G1	Number.of.introns1	2.66026e-08	2.66026e-08
G1	First.intron.length1	2.59908e-08	2.59908e-08
G1	First.intron.GC1	4.08663e-08	4.08663e-08
G1	mRNA.half.life.short1	1.4238e-180	1.4238e-180
G1	Ribosome.occupancy1	9.68403e-17	9.68403e-17
G1	Ribosome.density..rb.kb.1	0	0
G1	ORF.length..nt.1	3.51298e-224	3.51298e-224
G1	mRNA.level1	8.35746e-54	8.35746e-54
G1	GO.0006350_TRANSCRIPTION1	9.71295e-149	9.71295e-149
G1	GO.0006412_PROTEIN_BIOSYNTHESIS1	1.45595e-109	1.45595e-109
G1	GO.0006810_TRANSPORT1	1.27086e-272	1.27086e-272
G1	GO.0008150_BIOLOGICAL_PROCESS1	0.00116368	0.00116368
G1	GO.0016070_RNA_METABOLISM1	5.86791e-05	5.86791e-05
G1	nuc1	3.10669e-110	3.10669e-110
G1	cyto1	7.86879e-29	7.86879e-29
G1	mito1	0.241833	0.241833
G1	er1	2.30026e-82	2.30026e-82
G1	MOLECULAR.WEIGHT..in.Daltons.	4.83753e-223	4.83753e-223
G1	PI	8.57408e-295	8.57408e-295
G1	CAI..Codon.Adaptation.Index.	1.87333e-61	1.87333e-61
G1	PROTEIN.LENGTH	5.46703e-223	5.46703e-223
G1	CODON.BIAS	3.21899e-141	3.21899e-141
G1	ALA	1.33103e-48	1.33103e-48
G1	ARG	4.22272e-06	4.22272e-06
G1	ASN	5.03555e-166	5.03555e-166
G1	ASP	0	0
G1	CYS	4.0954e-22	4.0954e-22
G1	GLN	3.98566e-31	3.98566e-31
G1	GLU	3.62596e-28	3.62596e-28
G1	GLY	1.25078e-125	1.25078e-125
G1	HIS	8.74838e-21	8.74838e-21
G1	ILE	0	0
G1	LEU	0	0
G1	LYS	0	0
G1	MET	3.32397e-11	3.32397e-11
G1	PHE	8.25064e-05	8.25064e-05
G1	PRO	0.245841	0.245841
G1	SER	1.3258e-34	1.3258e-34
G1	THR	1.44217e-257	1.44217e-257
G1	TRP	3.08194e-05	3.08194e-05
G1	TYR	6.60585e-06	6.60585e-06
G1	VAL	5.55614e-232	5.55614e-232
G1	FOP.SCORE..Frequency.of.Optimal.Codons.	1.96498e-136	1.96498e-136
G1	GRAVY.SCORE..Hydropathicity.of.Protein.	1.10107e-127	1.10107e-127
G1	AROMATICITY.SCORE..Frequency.of.aromatic.amino.acids..Phe..Tyr..Trp.	0	0
G1	econt	1.98795e-67	1.98795e-67
G1	ccont	3.6886e-05	3.6886e-05
G1	hcont	0	0
G1	econtrel	5.9036e-275	5.9036e-275
G1	ccontrel	1.42258e-283	1.42258e-283
G1	hcontrel	0	0
G1	gene2	0.491875	0.491875
G1	tfcode2	0.446639	0.446639
G1	chromosome2	0.482651	0.482651
G1	strand2	0.526728	0.526728
G1	start2	0.443634	0.443634
G1	stop2	0.443653	0.443653
G1	protlength2	0.531898	0.531898
G1	pH2	0.56175	0.56175
G1	kDa2	0.529882	0.529882
G1	G2	0.523128	0.523128
G1	A2	0.496308	0.496308
G1	L2	0.534045	0.534045
G1	M2	0.410393	0.410393
G1	F2	0.504882	0.504882
G1	W2	0.480698	0.480698
G1	K2	0.484278	0.484278
G1	Q2	0.417989	0.417989
G1	E2	0.495854	0.495854
G1	S2	0.436849	0.436849
G1	P2	0.492612	0.492612
G1	V2	0.479362	0.479362
G1	I2	0.50326	0.50326
G1	C2	0.550093	0.550093
G1	Y2	0.521655	0.521655
G1	H2	0.482749	0.482749
G1	R2	0.493422	0.493422
G1	N2	0.520743	0.520743
G1	D2	0.465532	0.465532
G1	T2	0.527932	0.527932
G1	ncont2	0.587331	0.587331
G1	scont2	0.524071	0.524071
G1	Number.of.introns2	0.505551	0.505551
G1	First.intron.length2	0.49929	0.49929
G1	First.intron.GC2	0.507998	0.507998
G1	mRNA.half.life.short2	0.48348	0.48348
G1	Ribosome.occupancy2	0.52323	0.52323
G1	Ribosome.density..rb.kb.2	0.550277	0.550277
G1	ORF.length..nt.2	0.524458	0.524458
G1	mRNA.level2	0.506192	0.506192
G1	GO.0006350_TRANSCRIPTION2	0.467944	0.467944
G1	GO.0006412_PROTEIN_BIOSYNTHESIS2	0.518324	0.518324
G1	GO.0006810_TRANSPORT2	0.527929	0.527929
G1	GO.0007049_CELL_CYCLE2	0.467352	0.467352
G1	GO.0007165_SIGNAL_TRANSDUCTION2	0.495681	0.495681
G1	GO.0008150_BIOLOGICAL_PROCESS2	0.589359	0.589359
G1	GO.0016070_RNA_METABOLISM2	0.488392	0.488392
G1	nuc2	0.431102	0.431102
G1	vac2	0.489386	0.489386
G1	cyto2	0.504613	0.504613
G1	mito2	0.441988	0.441988
G1	relinstems	0.567598	0.567598
G1	length	0.527746	0.527746
G1	relnostems	0.52965	0.52965
G1	nstems	0.519168	0.519168
G1	cs3	0.535205	0.535205
G1	cs5	0.613301	0.613301
G1	csorf	0.442731	0.442731
G1	lu3	0.396661	0.396661
G1	u3A	0.503312	0.503312
G1	u3C	0.447971	0.447971
G1	u3T	0.449855	0.449855
G1	u3G	0.473598	0.473598
G1	u3AC	0.463296	0.463296
G1	u3AT	0.598853	0.598853
G1	u3AG	0.516717	0.516717
G1	u3CT	0.437057	0.437057
G1	u3CG	0.478413	0.478413
G1	u3TG	0.454326	0.454326
G1	X3AUel	0.395262	0.395262
G1	lu5	0.474775	0.474775
G1	u5A	0.568464	0.568464
G1	u5C	0.514836	0.514836
G1	u5T	0.544092	0.544092
G1	u5G	0.516716	0.516716
G1	u5AC	0.502586	0.502586
G1	u5AT	0.497933	0.497933
G1	u5AG	0.47757	0.47757
G1	u5CT	0.504592	0.504592
G1	u5CG	0.55527	0.55527
G1	u5TG	0.497134	0.497134
G1	X5AUel	0.471872	0.471872
G1	lcds	0.531898	0.531898
G1	cdsA	0.544569	0.544569
G1	cdsC	0.472456	0.472456
G1	cdsT	0.610423	0.610423
G1	cdsG	0.427633	0.427633
G1	cdsAC	0.482774	0.482774
G1	cdsAT	0.427272	0.427272
G1	cdsAG	0.576679	0.576679
G1	cdsCT	0.525684	0.525684
G1	cdsCG	0.455874	0.455874
G1	cdsTG	0.504113	0.504113
G1	cdsAUel	0.533255	0.533255
G1	ene	0.516325	0.516325
G1	halflife	0.47252	0.47252
G1	nostems	0.540206	0.540206
G1	relstems	0.467473	0.467473
G1	length.1	0.529494	0.529494
G1	lu3.1	0.396661	0.396661
G1	lu5.1	0.474775	0.474775
G1	lorf.1	0.531898	0.531898
G1	relnostems.1	0.491638	0.491638
G1	X3stems	0.55501	0.55501
G1	X5stems	0.413733	0.413733
G1	orfstems	0.540715	0.540715
G1	c3	0.528409	0.528409
G1	c5	0.446693	0.446693
G1	co	0.541187	0.541187
G1	orflength	0.529494	0.529494
G1	score	0.534621	0.534621
G1	gen	0.470879	0.470879
G1	lu3rel	0.453627	0.453627
G1	lu5rel	0.443684	0.443684
A1	L1	1.39402e-07	1.39402e-07
A1	M1	1.50887e-153	1.50887e-153
A1	F1	2.08604e-99	2.08604e-99
A1	W1	0.000252392	0.000252392
A1	K1	1.18916e-14	1.18916e-14
A1	Q1	1.86418e-16	1.86418e-16
A1	E1	1.24953e-41	1.24953e-41
A1	S1	1.40947e-05	1.40947e-05
A1	P1	5.75376e-07	5.75376e-07
A1	V1	1.49084e-64	1.49084e-64
A1	I1	1.19538e-06	1.19538e-06
A1	C1	1.27743e-40	1.27743e-40
A1	Y1	2.40832e-22	2.40832e-22
A1	H1	0.0315623	0.0315623
A1	R1	3.09049e-178	3.09049e-178
A1	N1	8.64499e-19	8.64499e-19
A1	D1	1.05e-124	1.05e-124
A1	T1	0.00413911	0.00413911
A1	ncont1	0	0
A1	scont1	8.53041e-91	8.53041e-91
A1	Number.of.introns1	8.96849e-20	8.96849e-20
A1	First.intron.length1	7.64172e-20	7.64172e-20
A1	First.intron.GC1	6.06815e-20	6.06815e-20
A1	mRNA.half.life.short1	9.43008e-230	9.43008e-230
A1	Ribosome.occupancy1	8.37756e-28	8.37756e-28
A1	Ribosome.density..rb.kb.1	2.56509e-42	2.56509e-42
A1	ORF.length..nt.1	4.99528e-144	4.99528e-144
A1	mRNA.level1	2.26682e-109	2.26682e-109
A1	GO.0006350_TRANSCRIPTION1	4.13879e-14	4.13879e-14
A1	GO.0006412_PROTEIN_BIOSYNTHESIS1	0	0
A1	GO.0006810_TRANSPORT1	1.00954e-122	1.00954e-122
A1	GO.0008150_BIOLOGICAL_PROCESS1	0.00262051	0.00262051
A1	GO.0016070_RNA_METABOLISM1	2.43048e-92	2.43048e-92
A1	nuc1	9.33273e-172	9.33273e-172
A1	cyto1	1.00857e-189	1.00857e-189
A1	mito1	0.315667	0.315667
A1	er1	5.64462e-115	5.64462e-115
A1	MOLECULAR.WEIGHT..in.Daltons.	3.90751e-139	3.90751e-139
A1	PI	2.9134e-18	2.9134e-18
A1	CAI..Codon.Adaptation.Index.	1.02786e-53	1.02786e-53
A1	PROTEIN.LENGTH	3.3047e-142	3.3047e-142
A1	CODON.BIAS	3.20056e-55	3.20056e-55
A1	ALA	0	0
A1	ARG	0.316146	0.316146
A1	ASN	5.07055e-72	5.07055e-72
A1	ASP	0.00546243	0.00546243
A1	CYS	8.03484e-65	8.03484e-65
A1	GLN	2.61422e-10	2.61422e-10
A1	GLU	5.105e-49	5.105e-49
A1	GLY	2.40505e-48	2.40505e-48
A1	HIS	7.69725e-51	7.69725e-51
A1	ILE	4.48107e-46	4.48107e-46
A1	LEU	1.37139e-12	1.37139e-12
A1	LYS	8.54064e-49	8.54064e-49
A1	MET	8.79054e-173	8.79054e-173
A1	PHE	1.24432e-238	1.24432e-238
A1	PRO	7.72926e-27	7.72926e-27
A1	SER	1.23438e-142	1.23438e-142
A1	THR	1.30382e-87	1.30382e-87
A1	TRP	5.84056e-23	5.84056e-23
A1	TYR	1.10978e-147	1.10978e-147
A1	VAL	1.6084e-144	1.6084e-144
A1	FOP.SCORE..Frequency.of.Optimal.Codons.	6.88719e-57	6.88719e-57
A1	GRAVY.SCORE..Hydropathicity.of.Protein.	4.27765e-305	4.27765e-305
[truncated: 16,956 more rows]

## Sheet: Dataset_S6
### Correlations between protein and mRNA features that are only significant in positive sets and not in randomized negative sets
[truncated: 646 more rows]
