# Supplementary material for: In silico characterization and prediction of global protein–mRNA interactions in yeast
Source: Oxford University Press journal article supplement (doi:10.1093/nar/gkr160), 2011-04-01
Supplement: 1371415_Supplementary_Data.zip [file 1371415_Supplementary_Data.zip › Dataset_S3.txt]

gene	tfcode1	tfcode2	chromosome1	chromosome2	strand1	strand2	start1	start2	stop1	stop2	protlength1	protlength2	pH1	pH2	kDa1	kDa2	G1	G2	A1	A2	L1	L2	M1	M2	F1	F2	W1	W2	K1	K2	Q1	Q2	E1	E2	S1	S2	P1	P2	V1	V2	I1	I2	C1	C2	Y1	Y2	H1	H2	R1
YOR359W_YBL032W	0	0	15	2	0	0	1011187	160187	1012758	161332	523	381	9.59	5.97	57.556	41.683	0.038167939	0.062827225	0.041984733	0.081151832	0.091603053	0.065445026	0.026717557	0.007853403	0.022900763	0.034031414	0.007633588	0	0.049618321	0.078534031	0.082061069	0.018324607	0.020992366	0.091623037	0.16221374	0.089005236	0.082061069	0.041884817	0.02480916	0.057591623	0.055343511	0.102094241	0.001908397	0.005235602	0.026717557	0.015706806	0.030534351	0.020942408	0.02480916
YOR359W_YBL111C	0	0	15	2	0	1	1011187	5009	1012758	2907	523	667	9.59	8.69	57.556	76.246	0.038167939	0.053892216	0.041984733	0.056886228	0.091603053	0.097305389	0.026717557	0.017964072	0.022900763	0.056886228	0.007633588	0.008982036	0.049618321	0.074850299	0.082061069	0.02245509	0.020992366	0.071856287	0.16221374	0.076347305	0.082061069	0.038922156	0.02480916	0.071856287	0.055343511	0.050898204	0.001908397	0.020958084	0.026717557	0.03742515	0.030534351	0.020958084	0.02480916
YOR359W_YBL112C	0	0	15	2	0	1	1011187	2899	1012758	2582	523	105	9.59	9.87	57.556	11.974	0.038167939	0.103773585	0.041984733	0.028301887	0.091603053	0.132075472	0.026717557	0.047169811	0.022900763	0.009433962	0.007633588	0.028301887	0.049618321	0.08490566	0.082061069	0.047169811	0.020992366	0.066037736	0.16221374	0.028301887	0.082061069	0.037735849	0.02480916	0.056603774	0.055343511	0.08490566	0.001908397	0.037735849	0.026717557	0.018867925	0.030534351	0	0.02480916
YOR359W_YBR057C	0	0	15	2	0	1	1011187	353291	1012758	352191	523	366	9.59	5.84	57.556	41.433	0.038167939	0.027247956	0.041984733	0.073569482	0.091603053	0.092643052	0.026717557	0.054495913	0.022900763	0.024523161	0.007633588	0.002724796	0.049618321	0.068119891	0.082061069	0.049046322	0.020992366	0.092643052	0.16221374	0.100817439	0.082061069	0.038147139	0.02480916	0.027247956	0.055343511	0.032697548	0.001908397	0.002724796	0.026717557	0.032697548	0.030534351	0.029972752	0.02480916
YOR359W_YBR068C	0	0	15	2	0	1	1011187	375687	1012758	373858	523	609	9.59	8.11	57.556	67.67	0.038167939	0.080327869	0.041984733	0.081967213	0.091603053	0.08852459	0.026717557	0.027868852	0.022900763	0.073770492	0.007633588	0.014754098	0.049618321	0.049180328	0.082061069	0.026229508	0.020992366	0.040983607	0.16221374	0.090163934	0.082061069	0.031147541	0.02480916	0.062295082	0.055343511	0.085245902	0.001908397	0.016393443	0.026717557	0.047540984	0.030534351	0.018032787	0.02480916
YOR359W_YBR126C	0	0	15	2	0	1	1011187	490386	1012758	488899	523	495	9.59	6.02	57.556	56.147	0.038167939	0.0625	0.041984733	0.046370968	0.091603053	0.092741935	0.026717557	0.016129032	0.022900763	0.048387097	0.007633588	0.02016129	0.049618321	0.064516129	0.082061069	0.036290323	0.020992366	0.070564516	0.16221374	0.078629032	0.082061069	0.038306452	0.02480916	0.090725806	0.055343511	0.060483871	0.001908397	0.008064516	0.026717557	0.04233871	0.030534351	0.030241935	0.02480916
YOR359W_YBR129C	0	0	15	2	0	1	1011187	495333	1012758	494347	523	328	9.59	8.22	57.556	37.739	0.038167939	0.042553191	0.041984733	0.054711246	0.091603053	0.075987842	0.026717557	0.021276596	0.022900763	0.048632219	0.007633588	0.018237082	0.049618321	0.103343465	0.082061069	0.03343465	0.020992366	0.060790274	0.16221374	0.088145897	0.082061069	0.03343465	0.02480916	0.03343465	0.055343511	0.069908815	0.001908397	0.012158055	0.026717557	0.027355623	0.030534351	0.039513678	0.02480916
YOR359W_YBR147W	0	0	15	2	0	0	1011187	536569	1012758	537459	523	296	9.59	5.22	57.556	33.496	0.038167939	0.053872054	0.041984733	0.053872054	0.091603053	0.141414141	0.026717557	0.026936027	0.022900763	0.063973064	0.007633588	0.016835017	0.049618321	0.053872054	0.082061069	0.037037037	0.020992366	0.053872054	0.16221374	0.077441077	0.082061069	0.047138047	0.02480916	0.060606061	0.055343511	0.111111111	0.001908397	0.02020202	0.026717557	0.04040404	0.030534351	0.003367003	0.02480916
YOR359W_YBR153W	0	0	15	2	0	0	1011187	547454	1012758	548188	523	244	9.59	6.78	57.556	27.116	0.038167939	0.065306122	0.041984733	0.040816327	0.091603053	0.093877551	0.026717557	0.020408163	0.022900763	0.028571429	0.007633588	0.020408163	0.049618321	0.057142857	0.082061069	0.040816327	0.020992366	0.044897959	0.16221374	0.065306122	0.082061069	0.069387755	0.02480916	0.07755102	0.055343511	0.081632653	0.001908397	0.016326531	0.026717557	0.016326531	0.030534351	0.024489796	0.02480916
YOR359W_YBR157C	0	0	15	2	0	1	1011187	554304	1012758	553537	523	255	9.59	10.22	57.556	28.772	0.038167939	0.0546875	0.041984733	0.02734375	0.091603053	0.0625	0.026717557	0.01171875	0.022900763	0.05859375	0.007633588	0	0.049618321	0.0859375	0.082061069	0.03515625	0.020992366	0.0703125	0.16221374	0.18359375	0.082061069	0.046875	0.02480916	0.01953125	0.055343511	0.05078125	0.001908397	0.0078125	0.026717557	0.03125	0.030534351	0.03515625	0.02480916
YOR359W_YBR197C	0	0	15	2	0	1	1011187	615851	1012758	615198	523	217	9.59	9.82	57.556	24.203	0.038167939	0.036697248	0.041984733	0.055045872	0.091603053	0.073394495	0.026717557	0.027522936	0.022900763	0.009174312	0.007633588	0.004587156	0.049618321	0.087155963	0.082061069	0.055045872	0.020992366	0.050458716	0.16221374	0.110091743	0.082061069	0.064220183	0.02480916	0.064220183	0.055343511	0.032110092	0.001908397	0.004587156	0.026717557	0.013761468	0.030534351	0.027522936	0.02480916
YOR359W_YBR248C	0	0	15	2	0	1	1011187	716460	1012758	714802	523	552	9.59	5.24	57.556	61.068	0.038167939	0.090415913	0.041984733	0.066907776	0.091603053	0.079566004	0.026717557	0.01084991	0.022900763	0.043399638	0.007633588	0.007233273	0.049618321	0.077757685	0.082061069	0.028933092	0.020992366	0.077757685	0.16221374	0.061482821	0.082061069	0.045207957	0.02480916	0.079566004	0.055343511	0.059674503	0.001908397	0.016274864	0.026717557	0.045207957	0.030534351	0.016274864	0.02480916
YOR359W_YBR265W	0	0	15	2	0	0	1011187	738577	1012758	739539	523	320	9.59	6.26	57.556	35.986	0.038167939	0.065420561	0.041984733	0.07788162	0.091603053	0.112149533	0.026717557	0.018691589	0.022900763	0.049844237	0.007633588	0.012461059	0.049618321	0.062305296	0.082061069	0.040498442	0.020992366	0.07165109	0.16221374	0.052959502	0.082061069	0.037383178	0.02480916	0.056074766	0.055343511	0.068535826	0.001908397	0.031152648	0.026717557	0.037383178	0.030534351	0.018691589	0.02480916
YOR359W_YCL036W	0	0	15	3	0	0	1011187	59026	1012758	60726	523	566	9.59	8.76	57.556	64.913	0.038167939	0.061728395	0.041984733	0.058201058	0.091603053	0.091710758	0.026717557	0.028218695	0.022900763	0.038800705	0.007633588	0.017636684	0.049618321	0.077601411	0.082061069	0.037037037	0.020992366	0.070546737	0.16221374	0.0670194	0.082061069	0.0335097	0.02480916	0.0670194	0.055343511	0.045855379	0.001908397	0.021164021	0.026717557	0.037037037	0.030534351	0.026455026	0.02480916
YOR359W_YCR065W	0	1	15	3	0	0	1011187	229306	1012758	231000	523	564	9.59	7.36	57.556	63.647	0.038167939	0.046017699	0.041984733	0.038938053	0.091603053	0.09380531	0.026717557	0.015929204	0.022900763	0.033628319	0.007633588	0.008849558	0.049618321	0.074336283	0.082061069	0.042477876	0.020992366	0.067256637	0.16221374	0.116814159	0.082061069	0.072566372	0.02480916	0.031858407	0.055343511	0.053097345	0.001908397	0.007079646	0.026717557	0.030088496	0.030534351	0.03539823	0.02480916
YOR359W_YCR075C	0	0	15	3	0	1	1011187	248812	1012758	248030	523	260	9.59	8.93	57.556	30.116	0.038167939	0.057471264	0.041984733	0.038314176	0.091603053	0.126436782	0.026717557	0.045977011	0.022900763	0.0651341	0.007633588	0.038314176	0.049618321	0.034482759	0.082061069	0.038314176	0.020992366	0.007662835	0.16221374	0.091954023	0.082061069	0.030651341	0.02480916	0.0651341	0.055343511	0.076628352	0.001908397	0.019157088	0.026717557	0.053639847	0.030534351	0.022988506	0.02480916
YOR359W_YDL022W	0	0	15	4	0	0	1011187	411823	1012758	412998	523	391	9.59	5.26	57.556	42.869	0.038167939	0.086734694	0.041984733	0.081632653	0.091603053	0.081632653	0.026717557	0.015306122	0.022900763	0.038265306	0.007633588	0.015306122	0.049618321	0.056122449	0.082061069	0.033163265	0.020992366	0.084183673	0.16221374	0.06122449	0.082061069	0.035714286	0.02480916	0.089285714	0.055343511	0.068877551	0.001908397	0.025510204	0.026717557	0.025510204	0.030534351	0.030612245	0.02480916
YOR359W_YDL023C	NA	NA	NA	NA	NA	NA	NA	NA	NA	NA	NA	NA	NA	NA	NA	NA	NA	NA	NA	NA	NA	NA	NA	NA	NA	NA	NA	NA	NA	NA	NA	NA	NA	NA	NA	NA	NA	NA	NA	NA	NA	NA	NA	NA	NA	NA	NA	NA	NA
YOR359W_YDL133W	0	0	15	4	0	0	1011187	222427	1012758	223740	523	437	9.59	9.14	57.556	49.58	0.038167939	0.047945205	0.041984733	0.057077626	0.091603053	0.100456621	0.026717557	0.00913242	0.022900763	0.038812785	0.007633588	0.01826484	0.049618321	0.073059361	0.082061069	0.04109589	0.020992366	0.059360731	0.16221374	0.100456621	0.082061069	0.038812785	0.02480916	0.052511416	0.055343511	0.068493151	0.001908397	0.01369863	0.026717557	0.038812785	0.030534351	0.015981735	0.02480916
YOR359W_YDL209C	0	0	15	4	0	1	1011187	87227	1012758	86208	523	339	9.59	7.97	57.556	38.43	0.038167939	0.073529412	0.041984733	0.052941176	0.091603053	0.1	0.026717557	0.020588235	0.022900763	0.052941176	0.007633588	0.014705882	0.049618321	0.094117647	0.082061069	0.032352941	0.020992366	0.073529412	0.16221374	0.073529412	0.082061069	0.041176471	0.02480916	0.044117647	0.055343511	0.041176471	0.001908397	0.017647059	0.026717557	0.020588235	0.030534351	0.014705882	0.02480916
YOR359W_YDL211C	0	0	15	4	0	1	1011187	80413	1012758	79295	523	372	9.59	5.28	57.556	40.752	0.038167939	0.048257373	0.041984733	0.034852547	0.091603053	0.058981233	0.026717557	0.00536193	0.022900763	0.042895442	0.007633588	0	0.049618321	0.026809651	0.082061069	0.034852547	0.020992366	0.058981233	0.16221374	0.158176944	0.082061069	0.037533512	0.02480916	0.064343164	0.055343511	0.08310992	0.001908397	0.00536193	0.026717557	0.040214477	0.030534351	0.018766756	0.02480916
YOR359W_YDL240W	0	0	15	4	0	0	1011187	22823	1012758	25876	523	1017	9.59	8.18	57.556	116.659	0.038167939	0.033398821	0.041984733	0.043222004	0.091603053	0.104125737	0.026717557	0.025540275	0.022900763	0.042239686	0.007633588	0.007858546	0.049618321	0.08546169	0.082061069	0.039292731	0.020992366	0.063850688	0.16221374	0.083497053	0.082061069	0.041257367	0.02480916	0.049115914	0.055343511	0.068762279	0.001908397	0.029469548	0.026717557	0.041257367	0.030534351	0.02259332	0.02480916
YOR359W_YDR274C	NA	NA	NA	NA	NA	NA	NA	NA	NA	NA	NA	NA	NA	NA	NA	NA	NA	NA	NA	NA	NA	NA	NA	NA	NA	NA	NA	NA	NA	NA	NA	NA	NA	NA	NA	NA	NA	NA	NA	NA	NA	NA	NA	NA	NA	NA	NA	NA	NA
YOR359W_YDR275W	0	0	15	4	0	0	1011187	1012249	1012758	1012956	523	235	9.59	5.1	57.556	26.581	0.038167939	0.050847458	0.041984733	0.038135593	0.091603053	0.118644068	0.026717557	0.029661017	0.022900763	0.050847458	0.007633588	0.004237288	0.049618321	0.063559322	0.082061069	0.012711864	0.020992366	0.080508475	0.16221374	0.110169492	0.082061069	0.021186441	0.02480916	0.050847458	0.055343511	0.093220339	0.001908397	0.021186441	0.026717557	0.029661017	0.030534351	0.021186441	0.02480916
YOR359W_YDR342C	0	0	15	4	0	1	1011187	1155923	1012758	1154211	523	570	9.59	7.7	57.556	62.735	0.038167939	0.092819615	0.041984733	0.078809107	0.091603053	0.071803853	0.026717557	0.03502627	0.022900763	0.061295972	0.007633588	0.022767075	0.049618321	0.045534151	0.082061069	0.022767075	0.020992366	0.050788091	0.16221374	0.077057793	0.082061069	0.038528897	0.02480916	0.094570928	0.055343511	0.082311734	0.001908397	0.019264448	0.026717557	0.043782837	0.030534351	0.010507881	0.02480916
YOR359W_YDR420W	0	0	15	4	0	0	1011187	1306260	1012758	1311668	523	1802	9.59	4.54	57.556	188.945	0.038167939	0.031613977	0.041984733	0.072656683	0.091603053	0.054353855	0.026717557	0.006655574	0.022900763	0.024958403	0.007633588	0.001109262	0.049618321	0.031059346	0.082061069	0.027176927	0.020992366	0.046589018	0.16221374	0.242373821	0.082061069	0.062118691	0.02480916	0.062673322	0.055343511	0.060454798	0.001908397	0.002773156	0.026717557	0.047143649	0.030534351	0.013311148	0.02480916
YOR359W_YEL007W	0	0	15	5	0	0	1011187	141891	1012758	143891	523	666	9.59	7.18	57.556	72.533	0.038167939	0.050974513	0.041984733	0.065967016	0.091603053	0.046476762	0.026717557	0.019490255	0.022900763	0.023988006	0.007633588	0.002998501	0.049618321	0.037481259	0.082061069	0.049475262	0.020992366	0.029985007	0.16221374	0.11844078	0.082061069	0.077961019	0.02480916	0.034482759	0.055343511	0.053973013	0.001908397	0.00149925	0.026717557	0.052473763	0.030534351	0.026986507	0.02480916
YOR359W_YEL011W	0	0	15	5	0	0	1011187	133120	1012758	135234	523	704	9.59	6.12	57.556	81.115	0.038167939	0.062411348	0.041984733	0.065248227	0.091603053	0.092198582	0.026717557	0.025531915	0.022900763	0.063829787	0.007633588	0.018439716	0.049618321	0.056737589	0.082061069	0.019858156	0.020992366	0.066666667	0.16221374	0.066666667	0.082061069	0.045390071	0.02480916	0.056737589	0.055343511	0.045390071	0.001908397	0.004255319	0.026717557	0.055319149	0.030534351	0.038297872	0.02480916
YOR359W_YEL060C	0	0	15	5	0	1	1011187	41953	1012758	40046	523	635	9.59	6.37	57.556	69.621	0.038167939	0.086477987	0.041984733	0.077044025	0.091603053	0.070754717	0.026717557	0.011006289	0.022900763	0.044025157	0.007633588	0.006289308	0.049618321	0.094339623	0.082061069	0.033018868	0.020992366	0.066037736	0.16221374	0.081761006	0.082061069	0.033018868	0.02480916	0.051886792	0.055343511	0.055031447	0.001908397	0.006289308	0.026717557	0.020440252	0.030534351	0.04245283	0.02480916
YOR359W_YEL064C	0	0	15	5	0	1	1011187	31239	1012758	29797	523	480	9.59	8.46	57.556	53.323	0.038167939	0.072765073	0.041984733	0.04989605	0.091603053	0.11018711	0.026717557	0.03950104	0.022900763	0.070686071	0.007633588	0.008316008	0.049618321	0.04989605	0.082061069	0.020790021	0.020992366	0.031185031	0.16221374	0.076923077	0.082061069	0.027027027	0.02480916	0.06029106	0.055343511	0.103950104	0.001908397	0.022869023	0.026717557	0.020790021	0.030534351	0.022869023	0.02480916
YOR359W_YEL075C	0	0	15	5	0	1	1011187	5713	1012758	5345	523	122	9.59	8.4	57.556	13.994	0.038167939	0.048780488	0.041984733	0.032520325	0.091603053	0.048780488	0.026717557	0.024390244	0.022900763	0.089430894	0.007633588	0	0.049618321	0.105691057	0.082061069	0.016260163	0.020992366	0.089430894	0.16221374	0.089430894	0.082061069	0.048780488	0.02480916	0.105691057	0.055343511	0.048780488	0.001908397	0.008130081	0.026717557	0.016260163	0.030534351	0.016260163	0.02480916
YOR359W_YEL076C	0	0	15	5	0	1	1011187	5114	1012758	4464	523	216	9.59	7.72	57.556	24.465	0.038167939	0.055299539	0.041984733	0.055299539	0.091603053	0.096774194	0.026717557	0.023041475	0.022900763	0.036866359	0.007633588	0.01843318	0.049618321	0.082949309	0.082061069	0.013824885	0.020992366	0.069124424	0.16221374	0.069124424	0.082061069	0.046082949	0.02480916	0.046082949	0.055343511	0.078341014	0.001908397	0.046082949	0.026717557	0.013824885	0.030534351	0.01843318	0.02480916
YOR359W_YEL076C-A	0	0	15	5	0	1	1011187	5114	1012758	4185	523	216	9.59	7.61	57.556	24.17	0.038167939	0.046082949	0.041984733	0.059907834	0.091603053	0.105990783	0.026717557	0.023041475	0.022900763	0.01843318	0.007633588	0.00921659	0.049618321	0.064516129	0.082061069	0.02764977	0.020992366	0.046082949	0.16221374	0.082949309	0.082061069	0.046082949	0.02480916	0.050691244	0.055343511	0.078341014	0.001908397	0.032258065	0.026717557	0.023041475	0.030534351	0.01843318	0.02480916
YOR359W_YEL077C	0	0	15	5	0	1	1011187	4097	1012758	264	523	1277	9.59	7.14	57.556	143.091	0.038167939	0.051643192	0.041984733	0.074334898	0.091603053	0.086071987	0.026717557	0.021126761	0.022900763	0.036776213	0.007633588	0.012519562	0.049618321	0.05399061	0.082061069	0.03286385	0.020992366	0.07198748	0.16221374	0.093896714	0.082061069	0.024256651	0.02480916	0.061032864	0.055343511	0.043035994	0.001908397	0.017214397	0.026717557	0.035211268	0.030534351	0.01799687	0.02480916
YOR359W_YER004W	0	0	15	5	0	0	1011187	159579	1012758	160274	523	231	9.59	10.03	57.556	25.086	0.038167939	0.099137931	0.041984733	0.094827586	0.091603053	0.112068966	0.026717557	0.017241379	0.022900763	0.038793103	0.007633588	0.004310345	0.049618321	0.068965517	0.082061069	0.043103448	0.020992366	0.047413793	0.16221374	0.060344828	0.082061069	0.034482759	0.02480916	0.068965517	0.055343511	0.056034483	0.001908397	0.00862069	0.026717557	0.025862069	0.030534351	0.021551724	0.02480916
YOR359W_YER018C	0	0	15	5	0	1	1011187	192623	1012758	191958	523	221	9.59	6.91	57.556	25.244	0.038167939	0.036036036	0.041984733	0.121621622	0.091603053	0.121621622	0.026717557	0.022522523	0.022900763	0.027027027	0.007633588	0.013513514	0.049618321	0.013513514	0.082061069	0.126126126	0.020992366	0.058558559	0.16221374	0.063063063	0.082061069	0.013513514	0.02480916	0.063063063	0.055343511	0.022522523	0.001908397	0.009009009	0.026717557	0.009009009	0.030534351	0.04954955	0.02480916
YOR359W_YER019W	0	0	15	5	0	0	1011187	192796	1012758	194229	523	477	9.59	7.5	57.556	53.94	0.038167939	0.056485356	0.041984733	0.083682008	0.091603053	0.10460251	0.026717557	0.012552301	0.022900763	0.043933054	0.007633588	0.020920502	0.049618321	0.048117155	0.082061069	0.041841004	0.020992366	0.052301255	0.16221374	0.081589958	0.082061069	0.035564854	0.02480916	0.050209205	0.055343511	0.066945607	0.001908397	0.020920502	0.026717557	0.037656904	0.030534351	0.033472803	0.02480916
YOR359W_YER031C	0	0	15	5	0	1	1011187	214746	1012758	214075	523	223	9.59	4.81	57.556	24.469	0.038167939	0.071428571	0.041984733	0.084821429	0.091603053	0.080357143	0.026717557	0.013392857	0.022900763	0.03125	0.007633588	0.008928571	0.049618321	0.0625	0.082061069	0.026785714	0.020992366	0.071428571	0.16221374	0.098214286	0.082061069	0.022321429	0.02480916	0.044642857	0.055343511	0.058035714	0.001908397	0.013392857	0.026717557	0.040178571	0.030534351	0.013392857	0.02480916
YOR359W_YER141W	0	0	15	5	0	0	1011187	453454	1012758	454914	523	486	9.59	10.97	57.556	54.658	0.038167939	0.063655031	0.041984733	0.073921971	0.091603053	0.125256674	0.026717557	0.032854209	0.022900763	0.047227926	0.007633588	0.030800821	0.049618321	0.071868583	0.082061069	0.030800821	0.020992366	0.045174538	0.16221374	0.0862423	0.082061069	0.045174538	0.02480916	0.067761807	0.055343511	0.061601643	0.001908397	0.006160164	0.026717557	0.020533881	0.030534351	0.020533881	0.02480916
YOR359W_YER145C	0	0	15	5	0	1	1011187	461735	1012758	460521	523	404	9.59	8.53	57.556	45.722	0.038167939	0.081481481	0.041984733	0.064197531	0.091603053	0.118518519	0.026717557	0.02962963	0.022900763	0.056790123	0.007633588	0.019753086	0.049618321	0.051851852	0.082061069	0.034567901	0.020992366	0.056790123	0.16221374	0.069135802	0.082061069	0.024691358	0.02480916	0.071604938	0.055343511	0.081481481	0.001908397	0.017283951	0.026717557	0.04691358	0.030534351	0.019753086	0.02480916
YOR359W_YER147C	0	0	15	5	0	1	1011187	464837	1012758	462963	523	624	9.59	7.7	57.556	72.14	0.038167939	0.0496	0.041984733	0.0464	0.091603053	0.1312	0.026717557	0.032	0.022900763	0.0416	0.007633588	0.016	0.049618321	0.0784	0.082061069	0.0608	0.020992366	0.0768	0.16221374	0.064	0.082061069	0.0224	0.02480916	0.0704	0.055343511	0.0496	0.001908397	0.0288	0.026717557	0.0448	0.030534351	0.0208	0.02480916
YOR359W_YER156C	0	0	15	5	0	1	1011187	484336	1012758	483320	523	338	9.59	7.5	57.556	38.174	0.038167939	0.064896755	0.041984733	0.064896755	0.091603053	0.08259587	0.026717557	0.017699115	0.022900763	0.061946903	0.007633588	0.014749263	0.049618321	0.08259587	0.082061069	0.026548673	0.020992366	0.064896755	0.16221374	0.091445428	0.082061069	0.038348083	0.02480916	0.061946903	0.055343511	0.064896755	0.001908397	0.01179941	0.026717557	0.029498525	0.030534351	0.020648968	0.02480916
YOR359W_YER167W	0	0	15	5	0	0	1011187	518211	1012758	520766	523	851	9.59	8.01	57.556	93.737	0.038167939	0.042253521	0.041984733	0.041079812	0.091603053	0.058685446	0.026717557	0.026995305	0.022900763	0.036384977	0.007633588	0.002347418	0.049618321	0.059859155	0.082061069	0.036384977	0.020992366	0.046948357	0.16221374	0.169014085	0.082061069	0.062206573	0.02480916	0.04342723	0.055343511	0.034037559	0.001908397	0.004694836	0.026717557	0.026995305	0.030534351	0.026995305	0.02480916
YOR359W_YER189W	0	0	15	5	0	0	1011187	571150	1012758	571518	523	122	9.59	7.46	57.556	14.008	0.038167939	0.048780488	0.041984733	0.032520325	0.091603053	0.048780488	0.026717557	0.024390244	0.022900763	0.089430894	0.007633588	0	0.049618321	0.097560976	0.082061069	0.024390244	0.020992366	0.089430894	0.16221374	0.089430894	0.082061069	0.048780488	0.02480916	0.097560976	0.055343511	0.056910569	0.001908397	0.008130081	0.026717557	0.016260163	0.030534351	0.016260163	0.02480916
YOR359W_YFL045C	0	0	15	6	0	1	1011187	44392	1012758	43628	523	254	9.59	4.99	57.556	29.063	0.038167939	0.078431373	0.041984733	0.043137255	0.091603053	0.098039216	0.026717557	0.011764706	0.022900763	0.078431373	0.007633588	0.007843137	0.049618321	0.074509804	0.082061069	0.02745098	0.020992366	0.098039216	0.16221374	0.058823529	0.082061069	0.031372549	0.02480916	0.058823529	0.055343511	0.054901961	0.001908397	0.011764706	0.026717557	0.035294118	0.030534351	0.015686275	0.02480916
YOR359W_YFL064C	0	0	15	6	0	1	1011187	3846	1012758	3322	523	174	9.59	9.18	57.556	20.427	0.038167939	0.04	0.041984733	0.028571429	0.091603053	0.085714286	0.026717557	0.022857143	0.022900763	0.085714286	0.007633588	0	0.049618321	0.091428571	0.082061069	0.028571429	0.020992366	0.074285714	0.16221374	0.074285714	0.082061069	0.045714286	0.02480916	0.068571429	0.055343511	0.045714286	0.001908397	0.017142857	0.026717557	0.051428571	0.030534351	0.017142857	0.02480916
YOR359W_YFL065C	0	0	15	6	0	1	1011187	3338	1012758	3030	523	102	9.59	9.82	57.556	11.785	0.038167939	0.038834951	0.041984733	0.038834951	0.091603053	0.106796117	0.026717557	0.038834951	0.022900763	0.048543689	0.007633588	0	0.049618321	0.087378641	0.082061069	0.029126214	0.020992366	0.038834951	0.16221374	0.077669903	0.082061069	0.058252427	0.02480916	0.058252427	0.055343511	0.058252427	0.001908397	0.038834951	0.026717557	0.038834951	0.030534351	0.019417476	0.02480916
YOR359W_YFR006W	0	0	15	6	0	0	1011187	156139	1012758	157746	523	535	9.59	6.1	57.556	61.753	0.038167939	0.061567164	0.041984733	0.048507463	0.091603053	0.087686567	0.026717557	0.026119403	0.022900763	0.055970149	0.007633588	0.007462687	0.049618321	0.076492537	0.082061069	0.024253731	0.020992366	0.082089552	0.16221374	0.054104478	0.082061069	0.044776119	0.02480916	0.054104478	0.055343511	0.072761194	0.001908397	0.018656716	0.026717557	0.044776119	0.030534351	0.031716418	0.02480916
YOR359W_YFR014C	0	0	15	6	0	1	1011187	173869	1012758	172529	523	446	9.59	6.01	57.556	50.296	0.038167939	0.053691275	0.041984733	0.062639821	0.091603053	0.109619687	0.026717557	0.008948546	0.022900763	0.035794183	0.007633588	0.008948546	0.049618321	0.11409396	0.082061069	0.03803132	0.020992366	0.091722595	0.16221374	0.073825503	0.082061069	0.040268456	0.02480916	0.062639821	0.055343511	0.046979866	0.001908397	0.011185682	0.026717557	0.029082774	0.030534351	0.017897092	0.02480916
YOR359W_YFR015C	0	0	15	6	0	1	1011187	176383	1012758	174257	523	708	9.59	5.93	57.556	80.51	0.038167939	0.060648801	0.041984733	0.06629055	0.091603053	0.101551481	0.026717557	0.018335684	0.022900763	0.047954866	0.007633588	0.011283498	0.049618321	0.057827927	0.082061069	0.02538787	0.020992366	0.067700987	0.16221374	0.052186178	0.082061069	0.04090268	0.02480916	0.077574048	0.055343511	0.047954866	0.001908397	0.009873061	0.026717557	0.043723554	0.030534351	0.029619182	0.02480916
YOR359W_YFR017C	0	0	15	6	0	1	1011187	182849	1012758	182262	523	195	9.59	7.2	57.556	21.783	0.038167939	0.056122449	0.041984733	0.051020408	0.091603053	0.040816327	0.026717557	0.035714286	0.022900763	0.040816327	0.007633588	0	0.049618321	0.035714286	0.082061069	0.045918367	0.020992366	0.051020408	0.16221374	0.12244898	0.082061069	0.091836735	0.02480916	0.030612245	0.055343511	0.040816327	0.001908397	0.010204082	0.026717557	0.025510204	0.030534351	0.035714286	0.02480916
YOR359W_YFR032C	0	0	15	6	0	1	1011187	222947	1012758	222078	523	289	9.59	6.68	57.556	31.865	0.038167939	0.020689655	0.041984733	0.1	0.091603053	0.068965517	0.026717557	0.003448276	0.022900763	0.031034483	0.007633588	0.003448276	0.049618321	0.068965517	0.082061069	0.051724138	0.020992366	0.051724138	0.16221374	0.062068966	0.082061069	0.093103448	0.02480916	0.065517241	0.055343511	0.05862069	0.001908397	0.010344828	0.026717557	0.027586207	0.030534351	0.017241379	0.02480916
YOR359W_YGL003C	0	0	15	7	0	1	1011187	494178	1012758	492478	523	566	9.59	8.92	57.556	62.821	0.038167939	0.05643739	0.041984733	0.054673721	0.091603053	0.086419753	0.026717557	0.019400353	0.022900763	0.029982363	0.007633588	0.015873016	0.049618321	0.051146384	0.082061069	0.029982363	0.020992366	0.044091711	0.16221374	0.132275132	0.082061069	0.051146384	0.02480916	0.065255732	0.055343511	0.045855379	0.001908397	0.010582011	0.026717557	0.026455026	0.030534351	0.029982363	0.02480916
YOR359W_YGL038C	0	0	15	7	0	1	1011187	426810	1012758	425368	523	480	9.59	7.85	57.556	55.155	0.038167939	0.035343035	0.041984733	0.03950104	0.091603053	0.091476091	0.026717557	0.024948025	0.022900763	0.045738046	0.007633588	0.022869023	0.049618321	0.079002079	0.082061069	0.043659044	0.020992366	0.037422037	0.16221374	0.106029106	0.082061069	0.062370062	0.02480916	0.045738046	0.055343511	0.072765073	0.001908397	0.002079002	0.026717557	0.037422037	0.030534351	0.022869023	0.02480916
YOR359W_YGL127C	0	0	15	7	0	1	1011187	270781	1012758	270398	523	127	9.59	4.26	57.556	14.741	0.038167939	0.0390625	0.041984733	0.0390625	0.091603053	0.125	0.026717557	0.03125	0.022900763	0.0390625	0.007633588	0.03125	0.049618321	0.0390625	0.082061069	0.078125	0.020992366	0.078125	0.16221374	0.0625	0.082061069	0.078125	0.02480916	0.0390625	0.055343511	0.0625	0.001908397	0.0234375	0.026717557	0.0546875	0.030534351	0	0.02480916
YOR359W_YGL187C	0	0	15	7	0	1	1011187	150177	1012758	149710	523	155	9.59	6.9	57.556	17.142	0.038167939	0.083333333	0.041984733	0.044871795	0.091603053	0.102564103	0.026717557	0.019230769	0.022900763	0.019230769	0.007633588	0.012820513	0.049618321	0.064102564	0.082061069	0.032051282	0.020992366	0.057692308	0.16221374	0.064102564	0.082061069	0.070512821	0.02480916	0.070512821	0.055343511	0.044871795	0.001908397	0.025641026	0.026717557	0.032051282	0.030534351	0.025641026	0.02480916
YOR359W_YGL225W	0	0	15	7	0	0	1011187	76893	1012758	77906	523	337	9.59	10.08	57.556	37.018	0.038167939	0.056213018	0.041984733	0.085798817	0.091603053	0.121301775	0.026717557	0.035502959	0.022900763	0.076923077	0.007633588	0.017751479	0.049618321	0.050295858	0.082061069	0.023668639	0.020992366	0.014792899	0.16221374	0.109467456	0.082061069	0.026627219	0.02480916	0.076923077	0.055343511	0.082840237	0.001908397	0.017751479	0.026717557	0.032544379	0.030534351	0.00591716	0.02480916
YOR359W_YGR046W	0	0	15	7	0	0	1011187	584899	1012758	586056	523	385	9.59	10.45	57.556	44.199	0.038167939	0.067357513	0.041984733	0.044041451	0.091603053	0.090673575	0.026717557	0.020725389	0.022900763	0.059585492	0.007633588	0.007772021	0.049618321	0.095854922	0.082061069	0.041450777	0.020992366	0.046632124	0.16221374	0.080310881	0.082061069	0.033678756	0.02480916	0.046632124	0.055343511	0.067357513	0.001908397	0.005181347	0.026717557	0.056994819	0.030534351	0.023316062	0.02480916
YOR359W_YGR068C	0	0	15	7	0	1	1011187	627088	1012758	625328	523	586	9.59	8.45	57.556	65.476	0.038167939	0.059625213	0.041984733	0.039182283	0.091603053	0.109028961	0.026717557	0.023850085	0.022900763	0.03407155	0.007633588	0.005110733	0.049618321	0.06132879	0.082061069	0.04088586	0.020992366	0.052810903	0.16221374	0.115843271	0.082061069	0.056218058	0.02480916	0.051107325	0.055343511	0.071550256	0.001908397	0.010221465	0.026717557	0.032367973	0.030534351	0.025553663	0.02480916
YOR359W_YGR079W	0	0	15	7	0	0	1011187	640724	1012758	641836	523	370	9.59	5.37	57.556	40.877	0.038167939	0.043126685	0.041984733	0.061994609	0.091603053	0.080862534	0.026717557	0.013477089	0.022900763	0.051212938	0.007633588	0.005390836	0.049618321	0.067385445	0.082061069	0.02425876	0.020992366	0.056603774	0.16221374	0.150943396	0.082061069	0.037735849	0.02480916	0.035040431	0.055343511	0.051212938	0.001908397	0.018867925	0.026717557	0.021563342	0.030534351	0.018867925	0.02480916
YOR359W_YGR256W	0	0	15	7	0	0	1011187	1004630	1012758	1006108	523	492	9.59	7.28	57.556	53.922	0.038167939	0.093306288	0.041984733	0.103448276	0.091603053	0.087221095	0.026717557	0.022312373	0.022900763	0.042596349	0.007633588	0.016227181	0.049618321	0.064908722	0.082061069	0.026369168	0.020992366	0.050709939	0.16221374	0.056795132	0.082061069	0.040567951	0.02480916	0.050709939	0.055343511	0.081135903	0.001908397	0.012170385	0.026717557	0.030425963	0.030534351	0.022312373	0.02480916
YOR359W_YHL020C	0	0	15	8	0	1	1011187	67453	1012758	66239	523	404	9.59	4.87	57.556	46.065	0.038167939	0.032098765	0.041984733	0.04691358	0.091603053	0.088888889	0.026717557	0.017283951	0.022900763	0.022222222	0.007633588	0.004938272	0.049618321	0.086419753	0.082061069	0.116049383	0.020992366	0.086419753	0.16221374	0.098765432	0.082061069	0.027160494	0.02480916	0.074074074	0.055343511	0.02962963	0.001908397	0.009876543	0.026717557	0.019753086	0.030534351	0.019753086	0.02480916
YOR359W_YHL028W	0	0	15	8	0	0	1011187	48761	1012758	50578	523	605	9.59	6.57	57.556	63.807	0.038167939	0.0330033	0.041984733	0.03960396	0.091603053	0.051155116	0.026717557	0.014851485	0.022900763	0.018151815	0.007633588	0.00660066	0.049618321	0.028052805	0.082061069	0.0330033	0.020992366	0.024752475	0.16221374	0.209570957	0.082061069	0.056105611	0.02480916	0.059405941	0.055343511	0.04950495	0.001908397	0.01980198	0.026717557	0.02970297	0.030534351	0.014851485	0.02480916
YOR359W_YHL049C	0	0	15	8	0	1	1011187	4540	1012758	3725	523	271	9.59	9.67	57.556	31.505	0.038167939	0.036764706	0.041984733	0.033088235	0.091603053	0.091911765	0.026717557	0.029411765	0.022900763	0.069852941	0.007633588	0	0.049618321	0.091911765	0.082061069	0.022058824	0.020992366	0.0625	0.16221374	0.080882353	0.082061069	0.047794118	0.02480916	0.073529412	0.055343511	0.047794118	0.001908397	0.022058824	0.026717557	0.040441176	0.030534351	0.022058824	0.02480916
YOR359W_YHL050C	0	0	15	8	0	1	1011187	3310	1012758	445	523	697	9.59	6.59	57.556	79.025	0.038167939	0.053008596	0.041984733	0.070200573	0.091603053	0.098853868	0.026717557	0.021489971	0.022900763	0.044412607	0.007633588	0.014326648	0.049618321	0.054441261	0.082061069	0.035816619	0.020992366	0.073065903	0.16221374	0.073065903	0.082061069	0.03008596	0.02480916	0.067335244	0.055343511	0.040114613	0.001908397	0.017191977	0.026717557	0.040114613	0.030534351	0.015759312	0.02480916
YOR359W_YHR018C	0	0	15	8	0	1	1011187	141395	1012758	140004	523	463	9.59	5.55	57.556	51.989	0.038167939	0.084051724	0.041984733	0.066810345	0.091603053	0.122844828	0.026717557	0.028017241	0.022900763	0.043103448	0.007633588	0.010775862	0.049618321	0.058189655	0.082061069	0.034482759	0.020992366	0.068965517	0.16221374	0.058189655	0.082061069	0.025862069	0.02480916	0.047413793	0.055343511	0.051724138	0.001908397	0.00862069	0.026717557	0.034482759	0.030534351	0.028017241	0.02480916
YOR359W_YHR030C	0	0	15	8	0	1	1011187	170337	1012758	168883	523	484	9.59	5.07	57.556	55.636	0.038167939	0.049484536	0.041984733	0.059793814	0.091603053	0.098969072	0.026717557	0.024742268	0.022900763	0.051546392	0.007633588	0.006185567	0.049618321	0.053608247	0.082061069	0.094845361	0.020992366	0.068041237	0.16221374	0.051546392	0.082061069	0.053608247	0.02480916	0.051546392	0.055343511	0.053608247	0.001908397	0.018556701	0.026717557	0.039175258	0.030534351	0.026804124	0.02480916
YOR359W_YHR050W	0	0	15	8	0	0	1011187	207648	1012758	209297	523	549	9.59	5.89	57.556	59.768	0.038167939	0.067272727	0.041984733	0.083636364	0.091603053	0.136363636	0.026717557	0.027272727	0.022900763	0.043636364	0.007633588	0.007272727	0.049618321	0.032727273	0.082061069	0.025454545	0.020992366	0.047272727	0.16221374	0.092727273	0.082061069	0.036363636	0.02480916	0.083636364	0.055343511	0.061818182	0.001908397	0.012727273	0.026717557	0.038181818	0.030534351	0.016363636	0.02480916
YOR359W_YHR092C	0	0	15	8	0	1	1011187	288814	1012758	287132	523	560	9.59	6.37	57.556	62.043	0.038167939	0.090909091	0.041984733	0.071301248	0.091603053	0.071301248	0.026717557	0.033868093	0.022900763	0.073083779	0.007633588	0.023172906	0.049618321	0.042780749	0.082061069	0.024955437	0.020992366	0.051693405	0.16221374	0.071301248	0.082061069	0.033868093	0.02480916	0.090909091	0.055343511	0.078431373	0.001908397	0.023172906	0.026717557	0.042780749	0.030534351	0.008912656	0.02480916
YOR359W_YHR094C	0	0	15	8	0	1	1011187	292628	1012758	290916	523	570	9.59	7.33	57.556	63.261	0.038167939	0.094570928	0.041984733	0.064798599	0.091603053	0.061295972	0.026717557	0.042031524	0.022900763	0.073555166	0.007633588	0.021015762	0.049618321	0.03502627	0.082061069	0.029772329	0.020992366	0.038528897	0.16221374	0.084063047	0.082061069	0.042031524	0.02480916	0.087565674	0.055343511	0.073555166	0.001908397	0.031523643	0.026717557	0.050788091	0.030534351	0.010507881	0.02480916
YOR359W_YHR096C	0	0	15	8	0	1	1011187	296450	1012758	294672	523	592	9.59	7.51	57.556	66.251	0.038167939	0.089376054	0.041984733	0.053962901	0.091603053	0.075885329	0.026717557	0.035413153	0.022900763	0.069139966	0.007633588	0.020236088	0.049618321	0.042158516	0.082061069	0.030354132	0.020992366	0.05227656	0.16221374	0.082630691	0.082061069	0.038785835	0.02480916	0.07925801	0.055343511	0.065767285	0.001908397	0.02529511	0.026717557	0.050590219	0.030534351	0.003372681	0.02480916
YOR359W_YHR200W	0	0	15	8	0	0	1011187	499079	1012758	499885	523	268	9.59	4.56	57.556	29.747	0.038167939	0.066914498	0.041984733	0.074349442	0.091603053	0.089219331	0.026717557	0.026022305	0.022900763	0.044609665	0.007633588	0	0.049618321	0.033457249	0.082061069	0.089219331	0.020992366	0.092936803	0.16221374	0.07063197	0.082061069	0.044609665	0.02480916	0.05204461	0.055343511	0.063197026	0.001908397	0.003717472	0.026717557	0.007434944	0.030534351	0.022304833	0.02480916
YOR359W_YHR211W	0	0	15	8	0	0	1011187	525392	1012758	528619	523	1075	9.59	4.04	57.556	111.981	0.038167939	0.06598513	0.041984733	0.043680297	0.091603053	0.036245353	0.026717557	0.01394052	0.022900763	0.024163569	0.007633588	0.01394052	0.049618321	0.016728625	0.082061069	0.028810409	0.020992366	0.055762082	0.16221374	0.162639405	0.082061069	0.052973978	0.02480916	0.06598513	0.055343511	0.066914498	0.001908397	0.015799257	0.026717557	0.023234201	0.030534351	0.005576208	0.02480916
YOR359W_YHR218W	0	0	15	8	0	0	1011187	558014	1012758	559924	523	603	9.59	8.79	57.556	68.85	0.038167939	0.056291391	0.041984733	0.05794702	0.091603053	0.100993377	0.026717557	0.018211921	0.022900763	0.052980132	0.007633588	0.009933775	0.049618321	0.071192053	0.082061069	0.024834437	0.020992366	0.067880795	0.16221374	0.074503311	0.082061069	0.039735099	0.02480916	0.071192053	0.055343511	0.051324503	0.001908397	0.021523179	0.026717557	0.039735099	0.030534351	0.021523179	0.02480916
YOR359W_YIL074C	0	0	15	9	0	1	1011187	222487	1012758	221078	523	469	9.59	6.39	57.556	51.188	0.038167939	0.063829787	0.041984733	0.080851064	0.091603053	0.091489362	0.026717557	0.019148936	0.022900763	0.029787234	0.007633588	0.006382979	0.049618321	0.057446809	0.082061069	0.038297872	0.020992366	0.059574468	0.16221374	0.1	0.082061069	0.036170213	0.02480916	0.074468085	0.055343511	0.082978723	0.001908397	0.008510638	0.026717557	0.029787234	0.030534351	0.025531915	0.02480916
YOR359W_YIL124W	0	0	15	9	0	0	1011187	126204	1012758	127097	523	297	9.59	9.92	57.556	32.814	0.038167939	0.067114094	0.041984733	0.097315436	0.091603053	0.083892617	0.026717557	0.026845638	0.022900763	0.05704698	0.007633588	0.003355705	0.049618321	0.090604027	0.082061069	0.030201342	0.020992366	0.046979866	0.16221374	0.063758389	0.082061069	0.05033557	0.02480916	0.067114094	0.055343511	0.060402685	0.001908397	0.013422819	0.026717557	0.036912752	0.030534351	0.010067114	0.02480916
YOR359W_YIL130W	0	0	15	9	0	0	1011187	102782	1012758	105676	523	964	9.59	6.07	57.556	108.78	0.038167939	0.029015544	0.041984733	0.052849741	0.091603053	0.092227979	0.026717557	0.014507772	0.022900763	0.038341969	0.007633588	0.003108808	0.049618321	0.05492228	0.082061069	0.043523316	0.020992366	0.049740933	0.16221374	0.10880829	0.082061069	0.051813472	0.02480916	0.038341969	0.055343511	0.070466321	0.001908397	0.013471503	0.026717557	0.039378238	0.030534351	0.015544041	0.02480916
YOR359W_YIL177C	0	0	15	9	0	1	1011187	6147	1012758	483	523	1758	9.59	7.39	57.556	197.51	0.038167939	0.05059693	0.041984733	0.068789085	0.091603053	0.087549744	0.026717557	0.019897669	0.022900763	0.040363843	0.007633588	0.010233087	0.049618321	0.056850483	0.082061069	0.030130756	0.020992366	0.06935759	0.16221374	0.092666288	0.082061069	0.028993746	0.02480916	0.061967027	0.055343511	0.046617396	0.001908397	0.01762365	0.026717557	0.035815804	0.030534351	0.017055145	0.02480916
YOR359W_YIR016W	0	0	15	9	0	0	1011187	382625	1012758	383422	523	265	9.59	5.01	57.556	28.881	0.038167939	0.056390977	0.041984733	0.078947368	0.091603053	0.078947368	0.026717557	0.018796992	0.022900763	0.022556391	0.007633588	0.007518797	0.049618321	0.033834586	0.082061069	0.037593985	0.020992366	0.056390977	0.16221374	0.161654135	0.082061069	0.04887218	0.02480916	0.04887218	0.055343511	0.045112782	0.001908397	0.018796992	0.026717557	0.015037594	0.030534351	0.033834586	0.02480916
YOR359W_YJL034W	0	0	15	10	0	0	1011187	381321	1012758	383369	523	682	9.59	4.62	57.556	74.467	0.038167939	0.077598829	0.041984733	0.083455344	0.091603053	0.090775988	0.026717557	0.01317716	0.022900763	0.036603221	0.007633588	0.001464129	0.049618321	0.087847731	0.082061069	0.030746706	0.020992366	0.080527086	0.16221374	0.057101025	0.082061069	0.029282577	0.02480916	0.083455344	0.055343511	0.06295754	0.001908397	0.001464129	0.026717557	0.026354319	0.030534351	0.011713031	0.02480916
YOR359W_YJL084C	0	0	15	10	0	1	1011187	277996	1012758	274856	523	1046	9.59	6.9	57.556	117.215	0.038167939	0.027698185	0.041984733	0.043935053	0.091603053	0.089780325	0.026717557	0.011461318	0.022900763	0.040114613	0.007633588	0.004775549	0.049618321	0.063037249	0.082061069	0.031518625	0.020992366	0.062082139	0.16221374	0.144221585	0.082061069	0.072588348	0.02480916	0.038204394	0.055343511	0.0582617	0.001908397	0.003820439	0.026717557	0.023877746	0.030534351	0.033428844	0.02480916
YOR359W_YJL122W	0	0	15	10	0	0	1011187	189714	1012758	190241	523	175	9.59	10.82	57.556	19.287	0.038167939	0.051136364	0.041984733	0.073863636	0.091603053	0.107954545	0.026717557	0.011363636	0.022900763	0.017045455	0.007633588	0.005681818	0.049618321	0.130681818	0.082061069	0.039772727	0.020992366	0.056818182	0.16221374	0.119318182	0.082061069	0.034090909	0.02480916	0.045454545	0.055343511	0.045454545	0.001908397	0	0.026717557	0.011363636	0.030534351	0.017045455	0.02480916
YOR359W_YJL155C	0	0	15	10	0	1	1011187	130639	1012758	129281	523	452	9.59	6.79	57.556	52.594	0.038167939	0.041942605	0.041984733	0.048565121	0.091603053	0.075055188	0.026717557	0.022075055	0.022900763	0.039735099	0.007633588	0.015452539	0.049618321	0.086092715	0.082061069	0.035320088	0.020992366	0.088300221	0.16221374	0.068432671	0.082061069	0.039735099	0.02480916	0.061810155	0.055343511	0.079470199	0.001908397	0.011037528	0.026717557	0.050772627	0.030534351	0.013245033	0.02480916
YOR359W_YJL157C	0	0	15	10	0	1	1011187	126324	1012758	123832	523	830	9.59	5.17	57.556	94.571	0.038167939	0.049338147	0.041984733	0.031287605	0.091603053	0.099879663	0.026717557	0.022864019	0.022900763	0.048134777	0.007633588	0.012033694	0.049618321	0.075812274	0.082061069	0.0433213	0.020992366	0.073405535	0.16221374	0.089049338	0.082061069	0.049338147	0.02480916	0.058965102	0.055343511	0.056558363	0.001908397	0.018050542	0.026717557	0.028880866	0.030534351	0.022864019	0.02480916
YOR359W_YJL225C	0	0	15	10	0	1	1011187	6130	1012758	466	523	1758	9.59	7.47	57.556	197.563	0.038167939	0.05059693	0.041984733	0.068789085	0.091603053	0.087549744	0.026717557	0.019897669	0.022900763	0.040363843	0.007633588	0.010233087	0.049618321	0.056850483	0.082061069	0.030130756	0.020992366	0.06935759	0.16221374	0.092666288	0.082061069	0.028993746	0.02480916	0.061967027	0.055343511	0.046617396	0.001908397	0.017055145	0.026717557	0.035815804	0.030534351	0.017055145	0.02480916
YOR359W_YJR016C	0	0	15	10	0	1	1011187	466200	1012758	464443	523	585	9.59	7.8	57.556	62.861	0.038167939	0.109215017	0.041984733	0.081911263	0.091603053	0.071672355	0.026717557	0.039249147	0.022900763	0.027303754	0.007633588	0.005119454	0.049618321	0.071672355	0.082061069	0.027303754	0.020992366	0.061433447	0.16221374	0.076791809	0.082061069	0.051194539	0.02480916	0.058020478	0.055343511	0.06996587	0.001908397	0.017064846	0.026717557	0.034129693	0.030534351	0.020477816	0.02480916
YOR359W_YJR112W	0	0	15	10	0	0	1011187	637020	1012758	637625	523	201	9.59	4.61	57.556	23.639	0.038167939	0.024752475	0.041984733	0.044554455	0.091603053	0.108910891	0.026717557	0.02970297	0.022900763	0.01980198	0.007633588	0.00990099	0.049618321	0.069306931	0.082061069	0.079207921	0.020992366	0.128712871	0.16221374	0.059405941	0.082061069	0.014851485	0.02480916	0.069306931	0.055343511	0.04950495	0.001908397	0.01980198	0.026717557	0.034653465	0.030534351	0.024752475	0.02480916
YOR359W_YJR123W	0	0	15	10	0	0	1011187	651891	1012758	652568	523	225	9.59	9.11	57.556	25.038	0.038167939	0.044247788	0.041984733	0.10619469	0.091603053	0.061946903	0.026717557	0.013274336	0.022900763	0.030973451	0.007633588	0.004424779	0.049618321	0.066371681	0.082061069	0.048672566	0.020992366	0.088495575	0.16221374	0.039823009	0.082061069	0.039823009	0.02480916	0.101769912	0.055343511	0.075221239	0.001908397	0.004424779	0.026717557	0.013274336	0.030534351	0.008849558	0.02480916
YOR359W_YKL035W	0	0	15	11	0	0	1011187	369534	1012758	371033	523	499	9.59	7.46	57.556	55.987	0.038167939	0.06	0.041984733	0.046	0.091603053	0.114	0.026717557	0.014	0.022900763	0.042	0.007633588	0.006	0.049618321	0.07	0.082061069	0.024	0.020992366	0.062	0.16221374	0.078	0.082061069	0.042	0.02480916	0.072	0.055343511	0.068	0.001908397	0.008	0.026717557	0.022	0.030534351	0.032	0.02480916
YOR359W_YKL052C	0	0	15	11	0	1	1011187	340190	1012758	339312	523	292	9.59	4.44	57.556	32.071	0.038167939	0.058020478	0.041984733	0.054607509	0.091603053	0.054607509	0.026717557	0.020477816	0.022900763	0.023890785	0.007633588	0.003412969	0.049618321	0.04778157	0.082061069	0.061433447	0.020992366	0.088737201	0.16221374	0.109215017	0.082061069	0.051194539	0.02480916	0.04778157	0.055343511	0.061433447	0.001908397	0.006825939	0.026717557	0.006825939	0.030534351	0.040955631	0.02480916
YOR359W_YKL185W	0	1	15	11	0	0	1011187	94504	1012758	96270	523	588	9.59	10.72	57.556	65.684	0.038167939	0.030560272	0.041984733	0.039049236	0.091603053	0.083191851	0.026717557	0.013582343	0.022900763	0.033955857	0.007633588	0.008488964	0.049618321	0.073005093	0.082061069	0.030560272	0.020992366	0.037351443	0.16221374	0.169779287	0.082061069	0.086587436	0.02480916	0.028862479	0.055343511	0.045840407	0.001908397	0.018675722	0.026717557	0.025466893	0.030534351	0.025466893	0.02480916
YOR359W_YKR045C	0	0	15	11	0	1	1011187	523611	1012758	523060	523	183	9.59	11.59	57.556	20.226	0.038167939	0.032608696	0.041984733	0.038043478	0.091603053	0.048913043	0.026717557	0.005434783	0.022900763	0.02173913	0.007633588	0.010869565	0.049618321	0.038043478	0.082061069	0.070652174	0.020992366	0.027173913	0.16221374	0.173913043	0.082061069	0.070652174	0.02480916	0.059782609	0.055343511	0.048913043	0.001908397	0.005434783	0.026717557	0	0.030534351	0.02173913	0.02480916
YOR359W_YKR051W	0	0	15	11	0	0	1011187	530588	1012758	531844	523	418	9.59	8.45	57.556	48.756	0.038167939	0.052505967	0.041984733	0.050119332	0.091603053	0.109785203	0.026717557	0.019093079	0.022900763	0.071599045	0.007633588	0.031026253	0.049618321	0.050119332	0.082061069	0.026252983	0.020992366	0.038186158	0.16221374	0.066825776	0.082061069	0.057279236	0.02480916	0.050119332	0.055343511	0.08353222	0.001908397	0.026252983	0.026717557	0.066825776	0.030534351	0.016706444	0.02480916
YOR359W_YKR058W	0	0	15	11	0	0	1011187	552412	1012758	554262	523	616	9.59	4.07	57.556	69.723	0.038167939	0.025931929	0.041984733	0.047001621	0.091603053	0.074554295	0.026717557	0.012965964	0.022900763	0.042139384	0.007633588	0.012965964	0.049618321	0.059967585	0.082061069	0.051863857	0.020992366	0.102106969	0.16221374	0.102106969	0.082061069	0.056726094	0.02480916	0.050243112	0.055343511	0.053484603	0.001908397	0.008103728	0.026717557	0.02917342	0.030534351	0.016207455	0.02480916
YOR359W_YKR093W	0	0	15	11	0	0	1011187	615372	1012758	617177	523	601	9.59	5.14	57.556	68.043	0.038167939	0.059800664	0.041984733	0.074750831	0.091603053	0.071428571	0.026717557	0.029900332	0.022900763	0.084717608	0.007633588	0.021594684	0.049618321	0.056478405	0.082061069	0.028239203	0.020992366	0.056478405	0.16221374	0.073089701	0.082061069	0.056478405	0.02480916	0.054817276	0.055343511	0.089700997	0.001908397	0.019933555	0.026717557	0.048172757	0.030534351	0.013289037	0.02480916
YOR359W_YLL066C	0	0	15	12	0	1	1011187	9836	1012758	6120	523	1205	9.59	7.81	57.556	135.645	0.038167939	0.054726368	0.041984733	0.068822554	0.091603053	0.092039801	0.026717557	0.020729685	0.022900763	0.03814262	0.007633588	0.013266998	0.049618321	0.059701493	0.082061069	0.032338308	0.020992366	0.072139303	0.16221374	0.090381426	0.082061069	0.027363184	0.02480916	0.062189055	0.055343511	0.045605307	0.001908397	0.019900498	0.026717557	0.032338308	0.030534351	0.018242123	0.02480916
YOR359W_YLL067C	0	0	15	12	0	1	1011187	4301	1012758	585	523	1205	9.59	7.95	57.556	135.235	0.038167939	0.053067993	0.041984733	0.070480929	0.091603053	0.087893864	0.026717557	0.01907131	0.022900763	0.037313433	0.007633588	0.013266998	0.049618321	0.058872305	0.082061069	0.032338308	0.020992366	0.072968491	0.16221374	0.092868988	0.082061069	0.026533997	0.02480916	0.06053068	0.055343511	0.043946932	0.001908397	0.019900498	0.026717557	0.031509121	0.030534351	0.017412935	0.02480916
YOR359W_YLR019W	0	0	15	12	0	0	1011187	180287	1012758	181480	523	397	9.59	4.46	57.556	44.772	0.038167939	0.047738693	0.041984733	0.042713568	0.091603053	0.085427136	0.026717557	0.015075377	0.022900763	0.025125628	0.007633588	0.002512563	0.049618321	0.042713568	0.082061069	0.055276382	0.020992366	0.08040201	0.16221374	0.092964824	0.082061069	0.057788945	0.02480916	0.060301508	0.055343511	0.045226131	0.001908397	0.010050251	0.026717557	0.042713568	0.030534351	0.040201005	0.02480916
YOR359W_YLR177W	0	0	15	12	0	0	1011187	511056	1012758	512942	523	628	9.59	9.38	57.556	71.265	0.038167939	0.042925278	0.041984733	0.054054054	0.091603053	0.104928458	0.026717557	0.015898251	0.022900763	0.052464229	0.007633588	0.004769475	0.049618321	0.074721781	0.082061069	0.07154213	0.020992366	0.034976153	0.16221374	0.095389507	0.082061069	0.047694754	0.02480916	0.041335453	0.055343511	0.058823529	0.001908397	0.0063593	0.026717557	0.041335453	0.030534351	0.019077901	0.02480916
YOR359W_YLR258W	0	0	15	12	0	0	1011187	660718	1012758	662835	523	705	9.59	6.32	57.556	80.078	0.038167939	0.065155807	0.041984733	0.073654391	0.091603053	0.099150142	0.026717557	0.019830028	0.022900763	0.050991501	0.007633588	0.011331445	0.049618321	0.052407932	0.082061069	0.028328612	0.020992366	0.062322946	0.16221374	0.049575071	0.082061069	0.043909348	0.02480916	0.073654391	0.055343511	0.04815864	0.001908397	0.009915014	0.026717557	0.041076487	0.030534351	0.033994334	0.02480916
YOR359W_YLR304C	0	0	15	12	0	1	1011187	737550	1012758	735214	523	778	9.59	8.15	57.556	85.368	0.038167939	0.089858793	0.041984733	0.086007702	0.091603053	0.07830552	0.026717557	0.020539153	0.022900763	0.035943517	0.007633588	0.01283697	0.049618321	0.082156611	0.082061069	0.028241335	0.020992366	0.047496791	0.16221374	0.047496791	0.082061069	0.053915276	0.02480916	0.059050064	0.055343511	0.066752246	0.001908397	0.008985879	0.026717557	0.029525032	0.030534351	0.02182285	0.02480916
YOR359W_YLR310C	0	0	15	12	0	1	1011187	756995	1012758	752226	523	1589	9.59	7.1	57.556	179.09	0.038167939	0.031446541	0.041984733	0.046540881	0.091603053	0.089937107	0.026717557	0.019496855	0.022900763	0.046540881	0.007633588	0.00754717	0.049618321	0.072327044	0.082061069	0.028301887	0.020992366	0.059119497	0.16221374	0.133962264	0.082061069	0.040880503	0.02480916	0.047169811	0.055343511	0.064150943	0.001908397	0.00754717	0.026717557	0.03081761	0.030534351	0.020754717	0.02480916
YOR359W_YLR355C	0	0	15	12	0	1	1011187	839252	1012758	838065	523	395	9.59	9.83	57.556	44.368	0.038167939	0.085858586	0.041984733	0.083333333	0.091603053	0.085858586	0.026717557	0.02020202	0.022900763	0.04040404	0.007633588	0.017676768	0.049618321	0.070707071	0.082061069	0.03030303	0.020992366	0.065656566	0.16221374	0.055555556	0.082061069	0.04040404	0.02480916	0.060606061	0.055343511	0.045454545	0.001908397	0.007575758	0.026717557	0.047979798	0.030534351	0.012626263	0.02480916
YOR359W_YLR462W	0	0	15	12	0	0	1011187	1065954	1012758	1066562	523	202	9.59	10.25	57.556	23.494	0.038167939	0.039408867	0.041984733	0.039408867	0.091603053	0.078817734	0.026717557	0.024630542	0.022900763	0.078817734	0.007633588	0	0.049618321	0.093596059	0.082061069	0.014778325	0.020992366	0.064039409	0.16221374	0.083743842	0.082061069	0.039408867	0.02480916	0.083743842	0.055343511	0.044334975	0.001908397	0.009852217	0.026717557	0.049261084	0.030534351	0.014778325	0.02480916
YOR359W_YLR463C	NA	NA	NA	NA	NA	NA	NA	NA	NA	NA	NA	NA	NA	NA	NA	NA	NA	NA	NA	NA	NA	NA	NA	NA	NA	NA	NA	NA	NA	NA	NA	NA	NA	NA	NA	NA	NA	NA	NA	NA	NA	NA	NA	NA	NA	NA	NA	NA	NA
YOR359W_YLR464W	0	0	15	12	0	0	1011187	1066570	1012758	1067499	523	216	9.59	7.61	57.556	24.17	0.038167939	0.046082949	0.041984733	0.059907834	0.091603053	0.105990783	0.026717557	0.023041475	0.022900763	0.01843318	0.007633588	0.00921659	0.049618321	0.064516129	0.082061069	0.02764977	0.020992366	0.046082949	0.16221374	0.082949309	0.082061069	0.046082949	0.02480916	0.050691244	0.055343511	0.078341014	0.001908397	0.032258065	0.026717557	0.023041475	0.030534351	0.01843318	0.02480916
YOR359W_YLR465C	NA	NA	NA	NA	NA	NA	NA	NA	NA	NA	NA	NA	NA	NA	NA	NA	NA	NA	NA	NA	NA	NA	NA	NA	NA	NA	NA	NA	NA	NA	NA	NA	NA	NA	NA	NA	NA	NA	NA	NA	NA	NA	NA	NA	NA	NA	NA	NA	NA
YOR359W_YLR466W	0	0	15	12	0	0	1011187	1067085	1012758	1071233	523	1382	9.59	7.15	57.556	156.366	0.038167939	0.052783803	0.041984733	0.068691251	0.091603053	0.09472162	0.026717557	0.023138106	0.022900763	0.039045553	0.007633588	0.01373825	0.049618321	0.053506869	0.082061069	0.033984093	0.020992366	0.07230658	0.16221374	0.084598698	0.082061069	0.028922632	0.02480916	0.065798988	0.055343511	0.044107014	0.001908397	0.018076645	0.026717557	0.038322487	0.030534351	0.018076645	0.02480916
YOR359W_YLR467W	0	0	15	12	0	0	1011187	1072506	1012758	1077896	523	1796	9.59	7.49	57.556	203.779	0.038167939	0.051752922	0.041984733	0.063995548	0.091603053	0.094045632	0.026717557	0.022815804	0.022900763	0.043962159	0.007633588	0.011686144	0.049618321	0.059543684	0.082061069	0.030606566	0.020992366	0.069560378	0.16221374	0.081803005	0.082061069	0.032276016	0.02480916	0.06622148	0.055343511	0.048414023	0.001908397	0.020033389	0.026717557	0.038397329	0.030534351	0.017250974	0.02480916
YOR359W_YML038C	0	0	15	13	0	1	1011187	204103	1012758	202775	523	442	9.59	7.46	57.556	49.614	0.038167939	0.060948081	0.041984733	0.047404063	0.091603053	0.128668172	0.026717557	0.022573363	0.022900763	0.072234763	0.007633588	0.015801354	0.049618321	0.047404063	0.082061069	0.036117381	0.020992366	0.040632054	0.16221374	0.085778781	0.082061069	0.036117381	0.02480916	0.083521445	0.055343511	0.083521445	0.001908397	0.011286682	0.026717557	0.033860045	0.030534351	0.015801354	0.02480916
YOR359W_YML059C	0	0	15	13	0	1	1011187	158258	1012758	153219	523	1679	9.59	8.19	57.556	187.131	0.038167939	0.056547619	0.041984733	0.050595238	0.091603053	0.100595238	0.026717557	0.02202381	0.022900763	0.042261905	0.007633588	0.00952381	0.049618321	0.055952381	0.082061069	0.035714286	0.020992366	0.050595238	0.16221374	0.120833333	0.082061069	0.046428571	0.02480916	0.054761905	0.055343511	0.0625	0.001908397	0.005952381	0.026717557	0.033928571	0.030534351	0.029761905	0.02480916
YOR359W_YML126C	0	0	15	13	0	1	1011187	20536	1012758	19061	523	491	9.59	8.23	57.556	55.013	0.038167939	0.069105691	0.041984733	0.06504065	0.091603053	0.085365854	0.026717557	0.016260163	0.022900763	0.036585366	0.007633588	0.008130081	0.049618321	0.087398374	0.082061069	0.042682927	0.020992366	0.046747967	0.16221374	0.071138211	0.082061069	0.032520325	0.02480916	0.069105691	0.055343511	0.058943089	0.001908397	0.016260163	0.026717557	0.056910569	0.030534351	0.016260163	0.02480916
YOR359W_YML133C	0	0	15	13	0	1	1011187	4684	1012758	461	523	1374	9.59	7.98	57.556	155.552	0.038167939	0.050181818	0.041984733	0.064	0.091603053	0.090909091	0.026717557	0.021090909	0.022900763	0.043636364	0.007633588	0.011636364	0.049618321	0.064	0.082061069	0.030545455	0.020992366	0.073454545	0.16221374	0.090909091	0.082061069	0.029090909	0.02480916	0.064727273	0.055343511	0.045818182	0.001908397	0.018909091	0.026717557	0.033454545	0.030534351	0.018909091	0.02480916
YOR359W_YMR001C	0	0	15	13	0	1	1011187	271136	1012758	269019	523	705	9.59	9.64	57.556	81.03	0.038167939	0.052407932	0.041984733	0.045325779	0.091603053	0.093484419	0.026717557	0.021246459	0.022900763	0.04815864	0.007633588	0.007082153	0.049618321	0.089235127	0.082061069	0.029745042	0.020992366	0.07223796	0.16221374	0.080736544	0.082061069	0.04815864	0.02480916	0.050991501	0.055343511	0.07223796	0.001908397	0.012747875	0.026717557	0.036827195	0.030534351	0.033994334	0.02480916
YOR359W_YMR011W	0	0	15	13	0	0	1011187	288078	1012758	289703	523	541	9.59	8.31	57.556	59.84	0.038167939	0.097785978	0.041984733	0.066420664	0.091603053	0.068265683	0.026717557	0.036900369	0.022900763	0.079335793	0.007633588	0.018450185	0.049618321	0.044280443	0.082061069	0.027675277	0.020992366	0.044280443	0.16221374	0.081180812	0.082061069	0.031365314	0.02480916	0.08302583	0.055343511	0.088560886	0.001908397	0.020295203	0.026717557	0.044280443	0.030534351	0.003690037	0.02480916
YOR359W_YMR152W	0	0	15	13	0	0	1011187	563095	1012758	564192	523	365	9.59	7.98	57.556	41.637	0.038167939	0.051912568	0.041984733	0.049180328	0.091603053	0.049180328	0.026717557	0.019125683	0.022900763	0.051912568	0.007633588	0.013661202	0.049618321	0.098360656	0.082061069	0.013661202	0.020992366	0.040983607	0.16221374	0.073770492	0.082061069	0.046448087	0.02480916	0.092896175	0.055343511	0.073770492	0.001908397	0.008196721	0.026717557	0.06557377	0.030534351	0.021857923	0.02480916
YOR359W_YMR199W	0	0	15	13	0	0	1011187	662643	1012758	664283	523	546	9.59	5.68	57.556	62.049	0.038167939	0.040219378	0.041984733	0.032906764	0.091603053	0.08226691	0.026717557	0.027422303	0.022900763	0.038391225	0.007633588	0.009140768	0.049618321	0.047531993	0.082061069	0.060329068	0.020992366	0.058500914	0.16221374	0.115173675	0.082061069	0.042047532	0.02480916	0.049360146	0.055343511	0.074954296	0.001908397	0.016453382	0.026717557	0.042047532	0.030534351	0.021937843	0.02480916
YOR359W_YMR235C	0	0	15	13	0	1	1011187	742734	1012758	741511	523	407	9.59	4.36	57.556	45.815	0.038167939	0.046568627	0.041984733	0.071078431	0.091603053	0.156862745	0.026717557	0.009803922	0.022900763	0.041666667	0.007633588	0.00245098	0.049618321	0.075980392	0.082061069	0.024509804	0.020992366	0.129901961	0.16221374	0.051470588	0.082061069	0.026960784	0.02480916	0.058823529	0.055343511	0.046568627	0.001908397	0.012254902	0.026717557	0.022058824	0.030534351	0.024509804	0.02480916
YOR359W_YMR268C	0	0	15	13	0	1	1011187	804221	1012758	802887	523	444	9.59	10.03	57.556	50.848	0.038167939	0.042696629	0.041984733	0.056179775	0.091603053	0.098876404	0.026717557	0.029213483	0.022900763	0.047191011	0.007633588	0.002247191	0.049618321	0.08988764	0.082061069	0.033707865	0.020992366	0.071910112	0.16221374	0.076404494	0.082061069	0.035955056	0.02480916	0.049438202	0.055343511	0.069662921	0.001908397	0.017977528	0.026717557	0.024719101	0.030534351	0.02247191	0.02480916
YOR359W_YMR272C	0	0	15	13	0	1	1011187	810776	1012758	809622	523	384	9.59	6.54	57.556	44.881	0.038167939	0.051948052	0.041984733	0.057142857	0.091603053	0.119480519	0.026717557	0.023376623	0.022900763	0.075324675	0.007633588	0.023376623	0.049618321	0.07012987	0.082061069	0.018181818	0.020992366	0.05974026	0.16221374	0.046753247	0.082061069	0.046753247	0.02480916	0.062337662	0.055343511	0.031168831	0.001908397	0.018181818	0.026717557	0.062337662	0.030534351	0.054545455	0.02480916
YOR359W_YNL053W	0	0	15	14	0	0	1011187	529943	1012758	531412	523	489	9.59	7.21	57.556	54.217	0.038167939	0.034693878	0.041984733	0.03877551	0.091603053	0.1	0.026717557	0.030612245	0.022900763	0.028571429	0.007633588	0.004081633	0.049618321	0.065306122	0.082061069	0.026530612	0.020992366	0.059183673	0.16221374	0.146938776	0.082061069	0.079591837	0.02480916	0.053061224	0.055343511	0.055102041	0.001908397	0.008163265	0.026717557	0.026530612	0.030534351	0.028571429	0.02480916
YOR359W_YNL116W	0	0	15	14	0	0	1011187	408343	1012758	409911	523	522	9.59	7.04	57.556	57.584	0.038167939	0.049713193	0.041984733	0.061185468	0.091603053	0.068833652	0.026717557	0.022944551	0.022900763	0.036328872	0.007633588	0.005736138	0.049618321	0.036328872	0.082061069	0.057361377	0.020992366	0.053537285	0.16221374	0.128107075	0.082061069	0.061185468	0.02480916	0.045889101	0.055343511	0.057361377	0.001908397	0.021032505	0.026717557	0.017208413	0.030534351	0.030592734	0.02480916
YOR359W_YNL289W	0	0	15	14	0	0	1011187	87897	1012758	88736	523	279	9.59	10.05	57.556	32.095	0.038167939	0.021428571	0.041984733	0.046428571	0.091603053	0.139285714	0.026717557	0.028571429	0.022900763	0.025	0.007633588	0.014285714	0.049618321	0.05	0.082061069	0.032142857	0.020992366	0.032142857	0.16221374	0.078571429	0.082061069	0.05	0.02480916	0.046428571	0.055343511	0.057142857	0.001908397	0.017857143	0.026717557	0.028571429	0.030534351	0.021428571	0.02480916
YOR359W_YNL339C	0	0	15	14	0	1	1011187	6098	1012758	371	523	1859	9.59	7.19	57.556	211.097	0.038167939	0.051075269	0.041984733	0.062365591	0.091603053	0.094086022	0.026717557	0.022580645	0.022900763	0.04516129	0.007633588	0.011290323	0.049618321	0.060215054	0.082061069	0.03172043	0.020992366	0.070430108	0.16221374	0.079569892	0.082061069	0.031182796	0.02480916	0.066666667	0.055343511	0.048387097	0.001908397	0.020967742	0.026717557	0.037634409	0.030534351	0.01827957	0.02480916
YOR359W_YOL020W	0	0	15	15	0	0	1011187	286173	1012758	287951	523	592	9.59	8.27	57.556	65.404	0.038167939	0.089376054	0.041984733	0.069139966	0.091603053	0.096121417	0.026717557	0.018549747	0.022900763	0.069139966	0.007633588	0.028667791	0.049618321	0.050590219	0.082061069	0.02529511	0.020992366	0.035413153	0.16221374	0.092748735	0.082061069	0.032040472	0.02480916	0.075885329	0.055343511	0.102866779	0.001908397	0.023608769	0.026717557	0.02698145	0.030534351	0.023608769	0.02480916
YOR359W_YOL105C	0	0	15	15	0	1	1011187	115808	1012758	114138	523	556	9.59	5.99	57.556	58.229	0.038167939	0.0502693	0.041984733	0.048473968	0.091603053	0.055655296	0.026717557	0.023339318	0.022900763	0.026929982	0.007633588	0.007181329	0.049618321	0.02513465	0.082061069	0.028725314	0.020992366	0.034111311	0.16221374	0.240574506	0.082061069	0.035906643	0.02480916	0.062836625	0.055343511	0.048473968	0.001908397	0.016157989	0.026717557	0.026929982	0.030534351	0.010771993	0.02480916
YOR359W_YOL119C	0	0	15	15	0	1	1011187	96361	1012758	94856	523	501	9.59	9.15	57.556	54.706	0.038167939	0.087649402	0.041984733	0.085657371	0.091603053	0.099601594	0.026717557	0.021912351	0.022900763	0.067729084	0.007633588	0.019920319	0.049618321	0.045816733	0.082061069	0.015936255	0.020992366	0.027888446	0.16221374	0.089641434	0.082061069	0.029880478	0.02480916	0.065737052	0.055343511	0.093625498	0.001908397	0.025896414	0.026717557	0.037848606	0.030534351	0.009960159	0.02480916
YOR359W_YOR038C	0	0	15	15	0	1	1011187	405388	1012758	402761	523	875	9.59	8.41	57.556	98.444	0.038167939	0.052511416	0.041984733	0.044520548	0.091603053	0.107305936	0.026717557	0.020547945	0.022900763	0.039954338	0.007633588	0.01369863	0.049618321	0.077625571	0.082061069	0.03652968	0.020992366	0.049086758	0.16221374	0.083333333	0.082061069	0.046803653	0.02480916	0.0456621	0.055343511	0.081050228	0.001908397	0.014840183	0.026717557	0.03196347	0.030534351	0.00913242	0.02480916
YOR359W_YOR043W	0	0	15	15	0	0	1011187	410870	1012758	412330	523	486	9.59	5.99	57.556	55.346	0.038167939	0.036960986	0.041984733	0.045174538	0.091603053	0.090349076	0.026717557	0.016427105	0.022900763	0.041067762	0.007633588	0.014373717	0.049618321	0.065708419	0.082061069	0.061601643	0.020992366	0.078028747	0.16221374	0.114989733	0.082061069	0.047227926	0.02480916	0.04312115	0.055343511	0.061601643	0.001908397	0.016427105	0.026717557	0.024640657	0.030534351	0.024640657	0.02480916
YOR359W_YOR044W	0	0	15	15	0	0	1011187	413007	1012758	413480	523	157	9.59	9.79	57.556	18.092	0.038167939	0.044303797	0.041984733	0.037974684	0.091603053	0.132911392	0.026717557	0.025316456	0.022900763	0.063291139	0.007633588	0	0.049618321	0.037974684	0.082061069	0.03164557	0.020992366	0.03164557	0.16221374	0.113924051	0.082061069	0.018987342	0.02480916	0.044303797	0.055343511	0.088607595	0.001908397	0.018987342	0.026717557	0.056962025	0.030534351	0.03164557	0.02480916
YOR359W_YOR047C	0	0	15	15	0	1	1011187	417682	1012758	416348	523	444	9.59	9.72	57.556	50.26	0.038167939	0.033707865	0.041984733	0.051685393	0.091603053	0.096629213	0.026717557	0.02247191	0.022900763	0.031460674	0.007633588	0.013483146	0.049618321	0.069662921	0.082061069	0.040449438	0.020992366	0.056179775	0.16221374	0.096629213	0.082061069	0.069662921	0.02480916	0.049438202	0.055343511	0.051685393	0.001908397	0.006741573	0.026717557	0.029213483	0.030534351	0.017977528	0.02480916
YOR359W_YOR101W	0	0	15	15	0	0	1011187	515245	1012758	516174	523	309	9.59	5.08	57.556	34.346	0.038167939	0.074193548	0.041984733	0.051612903	0.091603053	0.064516129	0.026717557	0.012903226	0.022900763	0.019354839	0.007633588	0	0.049618321	0.061290323	0.082061069	0.05483871	0.020992366	0.067741935	0.16221374	0.112903226	0.082061069	0.012903226	0.02480916	0.067741935	0.055343511	0.051612903	0.001908397	0.009677419	0.026717557	0.051612903	0.030534351	0.003225806	0.02480916
YOR359W_YOR157C	0	0	15	15	0	1	1011187	631752	1012758	630967	523	261	9.59	6.6	57.556	28.268	0.038167939	0.080152672	0.041984733	0.099236641	0.091603053	0.080152672	0.026717557	0.015267176	0.022900763	0.022900763	0.007633588	0.011450382	0.049618321	0.057251908	0.082061069	0.045801527	0.020992366	0.053435115	0.16221374	0.080152672	0.082061069	0.026717557	0.02480916	0.072519084	0.055343511	0.06870229	0.001908397	0.015267176	0.026717557	0.034351145	0.030534351	0.034351145	0.02480916
YOR359W_YOR187W	0	0	15	15	0	0	1011187	684031	1012758	685344	523	437	9.59	6.64	57.556	47.972	0.038167939	0.089041096	0.041984733	0.082191781	0.091603053	0.084474886	0.026717557	0.04109589	0.022900763	0.029680365	0.007633588	0	0.049618321	0.050228311	0.082061069	0.02739726	0.020992366	0.075342466	0.16221374	0.043378995	0.082061069	0.043378995	0.02480916	0.073059361	0.055343511	0.070776256	0.001908397	0.006849315	0.026717557	0.020547945	0.030534351	0.03196347	0.02480916
YOR359W_YOR337W	0	0	15	15	0	0	1011187	954341	1012758	956620	523	759	9.59	6.38	57.556	86.832	0.038167939	0.046052632	0.041984733	0.031578947	0.091603053	0.114473684	0.026717557	0.011842105	0.022900763	0.044736842	0.007633588	0.011842105	0.049618321	0.063157895	0.082061069	0.047368421	0.020992366	0.060526316	0.16221374	0.097368421	0.082061069	0.040789474	0.02480916	0.05	0.055343511	0.056578947	0.001908397	0.018421053	0.026717557	0.046052632	0.030534351	0.013157895	0.02480916
YOR359W_YOR359W	0	0	15	15	0	0	1011187	1011187	1012758	1012758	523	523	9.59	9.59	57.556	57.556	0.038167939	0.038167939	0.041984733	0.041984733	0.091603053	0.091603053	0.026717557	0.026717557	0.022900763	0.022900763	0.007633588	0.007633588	0.049618321	0.049618321	0.082061069	0.082061069	0.020992366	0.020992366	0.16221374	0.16221374	0.082061069	0.082061069	0.02480916	0.02480916	0.055343511	0.055343511	0.001908397	0.001908397	0.026717557	0.026717557	0.030534351	0.030534351	0.02480916
YOR359W_YPL133C	0	0	15	16	0	1	1011187	301227	1012758	299887	523	446	9.59	7.63	57.556	50.081	0.038167939	0.040268456	0.041984733	0.060402685	0.091603053	0.087248322	0.026717557	0.024608501	0.022900763	0.035794183	0.007633588	0.002237136	0.049618321	0.064876957	0.082061069	0.040268456	0.020992366	0.06935123	0.16221374	0.116331096	0.082061069	0.051454139	0.02480916	0.049217002	0.055343511	0.046979866	0.001908397	0.029082774	0.026717557	0.031319911	0.030534351	0.013422819	0.02480916
YOR359W_YPL168W	0	0	15	16	0	0	1011187	231216	1012758	232508	523	430	9.59	10.7	57.556	48.827	0.038167939	0.055684455	0.041984733	0.048723898	0.091603053	0.102088167	0.026717557	0.025522042	0.022900763	0.041763341	0.007633588	0.006960557	0.049618321	0.106728538	0.082061069	0.046403712	0.020992366	0.048723898	0.16221374	0.085846868	0.082061069	0.027842227	0.02480916	0.051044084	0.055343511	0.064965197	0.001908397	0.009280742	0.026717557	0.025522042	0.030534351	0.018561485	0.02480916
YOR359W_YPR056W	0	0	15	16	0	0	1011187	671123	1012758	672139	523	338	9.59	9.04	57.556	37.457	0.038167939	0.044247788	0.041984733	0.067846608	0.091603053	0.085545723	0.026717557	0.017699115	0.022900763	0.038348083	0.007633588	0.002949853	0.049618321	0.088495575	0.082061069	0.029498525	0.020992366	0.064896755	0.16221374	0.097345133	0.082061069	0.044247788	0.02480916	0.076696165	0.055343511	0.08259587	0.001908397	0.026548673	0.026717557	0.029498525	0.030534351	0.014749263	0.02480916
YOR359W_YPR083W	0	0	15	16	0	0	1011187	704852	1012758	706591	523	579	9.59	5.22	57.556	64.958	0.038167939	0.039655172	0.041984733	0.031034483	0.091603053	0.115517241	0.026717557	0.029310345	0.022900763	0.025862069	0.007633588	0.010344828	0.049618321	0.05862069	0.082061069	0.037931034	0.020992366	0.067241379	0.16221374	0.153448276	0.082061069	0.027586207	0.02480916	0.032758621	0.055343511	0.065517241	0.001908397	0.010344828	0.026717557	0.013793103	0.030534351	0.025862069	0.02480916
YOR359W_YPR084W	0	0	15	16	0	0	1011187	706970	1012758	708340	523	456	9.59	7.14	57.556	50.834	0.038167939	0.048140044	0.041984733	0.039387309	0.091603053	0.10940919	0.026717557	0.01750547	0.022900763	0.028446389	0.007633588	0.010940919	0.049618321	0.067833698	0.082061069	0.026258206	0.020992366	0.059080963	0.16221374	0.126914661	0.082061069	0.061269147	0.02480916	0.067833698	0.055343511	0.065645514	0.001908397	0.008752735	0.026717557	0.028446389	0.030534351	0.026258206	0.02480916
YOR359W_YPR202W	0	0	15	16	0	0	1011187	943028	1012758	943892	523	238	9.59	7.07	57.556	27.858	0.038167939	0.037656904	0.041984733	0.025104603	0.091603053	0.083682008	0.026717557	0.020920502	0.022900763	0.079497908	0.007633588	0	0.049618321	0.087866109	0.082061069	0.037656904	0.020992366	0.075313808	0.16221374	0.066945607	0.082061069	0.033472803	0.02480916	0.062761506	0.055343511	0.066945607	0.001908397	0.020920502	0.026717557	0.046025105	0.030534351	0.025104603	0.02480916
YOR359W_YPR203W	0	0	15	16	0	0	1011187	943876	1012758	944184	523	102	9.59	9.38	57.556	11.766	0.038167939	0.038834951	0.041984733	0.038834951	0.091603053	0.106796117	0.026717557	0.038834951	0.022900763	0.048543689	0.007633588	0	0.049618321	0.087378641	0.082061069	0.029126214	0.020992366	0.038834951	0.16221374	0.077669903	0.082061069	0.058252427	0.02480916	0.058252427	0.055343511	0.058252427	0.001908397	0.038834951	0.026717557	0.038834951	0.030534351	0.029126214	0.02480916
YOR359W_YPR204W	0	0	15	16	0	0	1011187	944599	1012758	947697	523	1032	9.59	6.7	57.556	115.155	0.038167939	0.054211036	0.041984733	0.072604066	0.091603053	0.088092933	0.026717557	0.020329138	0.022900763	0.034849952	0.007633588	0.013552759	0.049618321	0.056147144	0.082061069	0.030009681	0.020992366	0.076476283	0.16221374	0.09196515	0.082061069	0.024201355	0.02480916	0.064859632	0.055343511	0.041626331	0.001908397	0.020329138	0.026717557	0.030977735	0.030534351	0.015488867	0.02480916
YGR192C_YAR071W	0	0	7	1	1	0	883815	225451	882817	226854	332	467	6.96	4.86	35.746	52.757	0.078078078	0.061965812	0.096096096	0.061965812	0.063063063	0.074786325	0.021021021	0.017094017	0.03003003	0.055555556	0.009009009	0.014957265	0.078078078	0.055555556	0.015015015	0.032051282	0.045045045	0.051282051	0.078078078	0.083333333	0.036036036	0.027777778	0.111111111	0.05982906	0.057057057	0.049145299	0.006006006	0.019230769	0.033033033	0.05982906	0.024024024	0.019230769	0.033033033
YGR192C_YBL020W	0	0	7	2	1	0	883815	182404	882817	184128	332	574	6.96	9.94	35.746	66.21	0.078078078	0.045217391	0.096096096	0.048695652	0.063063063	0.140869565	0.021021021	0.017391304	0.03003003	0.095652174	0.009009009	0.015652174	0.078078078	0.057391304	0.015015015	0.036521739	0.045045045	0.04173913	0.078078078	0.083478261	0.036036036	0.022608696	0.111111111	0.053913043	0.057057057	0.099130435	0.006006006	0.012173913	0.033033033	0.04	0.024024024	0.012173913	0.033033033
YGR192C_YBL079W	0	0	7	2	1	0	883815	75256	882817	79764	332	1502	6.96	6.04	35.746	169.473	0.078078078	0.043912176	0.096096096	0.055222888	0.063063063	0.095808383	0.021021021	0.018629408	0.03003003	0.05655356	0.009009009	0.00665336	0.078078078	0.065202927	0.015015015	0.03992016	0.045045045	0.061876248	0.078078078	0.101796407	0.036036036	0.037258816	0.111111111	0.054557552	0.057057057	0.087824351	0.006006006	0.008649368	0.033033033	0.03659348	0.024024024	0.017964072	0.033033033
YGR192C_YBL083C	NA	NA	NA	NA	NA	NA	NA	NA	NA	NA	NA	NA	NA	NA	NA	NA	NA	NA	NA	NA	NA	NA	NA	NA	NA	NA	NA	NA	NA	NA	NA	NA	NA	NA	NA	NA	NA	NA	NA	NA	NA	NA	NA	NA	NA	NA	NA	NA	NA
YGR192C_YBL101W-A	NA	NA	NA	NA	NA	NA	NA	NA	NA	NA	NA	NA	NA	NA	NA	NA	NA	NA	NA	NA	NA	NA	NA	NA	NA	NA	NA	NA	NA	NA	NA	NA	NA	NA	NA	NA	NA	NA	NA	NA	NA	NA	NA	NA	NA	NA	NA	NA	NA
YGR192C_YBR008C	0	0	7	2	1	1	883815	254210	882817	252564	332	548	6.96	6.31	35.746	61.628	0.078078078	0.069216758	0.096096096	0.076502732	0.063063063	0.114754098	0.021021021	0.027322404	0.03003003	0.076502732	0.009009009	0.018214936	0.078078078	0.029143898	0.015015015	0.018214936	0.045045045	0.047358834	0.078078078	0.061930783	0.036036036	0.052823315	0.111111111	0.076502732	0.057057057	0.06557377	0.006006006	0.027322404	0.033033033	0.052823315	0.024024024	0.014571949	0.033033033
YGR192C_YBR015C	0	0	7	2	1	1	883815	269503	882817	267710	332	597	6.96	6.18	35.746	67.773	0.078078078	0.058528428	0.096096096	0.056856187	0.063063063	0.100334448	0.021021021	0.016722408	0.03003003	0.056856187	0.009009009	0.006688963	0.078078078	0.095317726	0.015015015	0.015050167	0.045045045	0.056856187	0.078078078	0.071906355	0.036036036	0.04180602	0.111111111	0.055183946	0.057057057	0.048494983	0.006006006	0.011705686	0.033033033	0.060200669	0.024024024	0.018394649	0.033033033
YGR192C_YBR065C	0	0	7	2	1	1	883815	369676	882817	368582	332	364	6.96	10.24	35.746	40.924	0.078078078	0.043835616	0.096096096	0.043835616	0.063063063	0.109589041	0.021021021	0.016438356	0.03003003	0.035616438	0.009009009	0.010958904	0.078078078	0.117808219	0.015015015	0.024657534	0.045045045	0.054794521	0.078078078	0.093150685	0.036036036	0.043835616	0.111111111	0.035616438	0.057057057	0.084931507	0.006006006	0.02739726	0.033033033	0.010958904	0.024024024	0.016438356	0.033033033
YGR192C_YBR105C	0	0	7	2	1	1	883815	451963	882817	450875	332	362	6.96	6.74	35.746	41.245	0.078078078	0.038567493	0.096096096	0.052341598	0.063063063	0.082644628	0.021021021	0.013774105	0.03003003	0.055096419	0.009009009	0.008264463	0.078078078	0.066115702	0.015015015	0.066115702	0.045045045	0.055096419	0.078078078	0.099173554	0.036036036	0.066115702	0.111111111	0.052341598	0.057057057	0.035812672	0.006006006	0.011019284	0.033033033	0.049586777	0.024024024	0.03030303	0.033033033
YGR192C_YBR158W	0	0	7	2	1	0	883815	556543	882817	558192	332	549	6.96	9.67	35.746	62.686	0.078078078	0.030909091	0.096096096	0.047272727	0.063063063	0.118181818	0.021021021	0.018181818	0.03003003	0.04	0.009009009	0.014545455	0.078078078	0.078181818	0.015015015	0.036363636	0.045045045	0.063636364	0.078078078	0.090909091	0.036036036	0.054545455	0.111111111	0.065454545	0.057057057	0.056363636	0.006006006	0.021818182	0.033033033	0.016363636	0.024024024	0.027272727	0.033033033
YGR192C_YBR187W	0	0	7	2	1	0	883815	602629	882817	603471	332	280	6.96	5.21	35.746	30.34	0.078078078	0.071174377	0.096096096	0.128113879	0.063063063	0.103202847	0.021021021	0.060498221	0.03003003	0.060498221	0.009009009	0.007117438	0.078078078	0.049822064	0.015015015	0.021352313	0.045045045	0.056939502	0.078078078	0.09252669	0.036036036	0.007117438	0.111111111	0.06405694	0.057057057	0.088967972	0.006006006	0.003558719	0.033033033	0.024911032	0.024024024	0.017793594	0.033033033
YGR192C_YBR283C	0	0	7	2	1	1	883815	770411	882817	768939	332	490	6.96	8.18	35.746	53.311	0.078078078	0.085539715	0.096096096	0.073319756	0.063063063	0.122199593	0.021021021	0.010183299	0.03003003	0.071283096	0.009009009	0.00407332	0.078078078	0.044806517	0.015015015	0.044806517	0.045045045	0.036659878	0.078078078	0.054989817	0.036036036	0.044806517	0.111111111	0.085539715	0.057057057	0.114052953	0.006006006	0.00814664	0.033033033	0.028513238	0.024024024	0.00814664	0.033033033
YGR192C_YCL002C	0	0	7	3	1	1	883815	111674	882817	110843	332	251	6.96	9.13	35.746	29.018	0.078078078	0.051587302	0.096096096	0.031746032	0.063063063	0.146825397	0.021021021	0.027777778	0.03003003	0.083333333	0.009009009	0.015873016	0.078078078	0.043650794	0.015015015	0.031746032	0.045045045	0.015873016	0.078078078	0.103174603	0.036036036	0.031746032	0.111111111	0.063492063	0.057057057	0.095238095	0.006006006	0.03968254	0.033033033	0.075396825	0.024024024	0.015873016	0.033033033
YGR192C_YCL005W	0	0	7	3	1	0	883815	108021	882817	108791	332	256	6.96	8.07	35.746	29.023	0.078078078	0.038910506	0.096096096	0.046692607	0.063063063	0.093385214	0.021021021	0.027237354	0.03003003	0.062256809	0.009009009	0.019455253	0.078078078	0.031128405	0.015015015	0.035019455	0.045045045	0.023346304	0.078078078	0.077821012	0.036036036	0.062256809	0.111111111	0.073929961	0.057057057	0.089494163	0.006006006	0.019455253	0.033033033	0.023346304	0.024024024	0.019455253	0.033033033
YGR192C_YCR082W	0	0	7	3	1	0	883815	258880	882817	259266	332	128	6.96	4.6	35.746	15.117	0.078078078	0.023255814	0.096096096	0.054263566	0.063063063	0.124031008	0.021021021	0.007751938	0.03003003	0.054263566	0.009009009	0.015503876	0.078078078	0.069767442	0.015015015	0.085271318	0.045045045	0.069767442	0.078078078	0.023255814	0.036036036	0.015503876	0.111111111	0.046511628	0.057057057	0.07751938	0.006006006	0.007751938	0.033033033	0.031007752	0.024024024	0.023255814	0.033033033
YGR192C_YDL052C	0	0	7	4	1	1	883815	363583	882817	362672	332	303	6.96	10.41	35.746	33.887	0.078078078	0.065789474	0.096096096	0.059210526	0.063063063	0.098684211	0.021021021	0.032894737	0.03003003	0.042763158	0.009009009	0.009868421	0.078078078	0.095394737	0.015015015	0.029605263	0.045045045	0.042763158	0.078078078	0.0625	0.036036036	0.049342105	0.111111111	0.088815789	0.057057057	0.069078947	0.006006006	0.016447368	0.033033033	0.036184211	0.024024024	0.023026316	0.033033033
YGR192C_YDR004W	0	0	7	4	1	0	883815	455199	882817	456581	332	460	6.96	6.61	35.746	52.247	0.078078078	0.054229935	0.096096096	0.043383948	0.063063063	0.10845987	0.021021021	0.021691974	0.03003003	0.034707158	0.009009009	0.00867679	0.078078078	0.062906725	0.015015015	0.04989154	0.045045045	0.067245119	0.078078078	0.095444685	0.036036036	0.034707158	0.111111111	0.060737527	0.057057057	0.069414317	0.006006006	0.010845987	0.033033033	0.043383948	0.024024024	0.019522777	0.033033033
YGR192C_YDR204W	0	0	7	4	1	0	883815	858135	882817	859142	332	335	6.96	10.48	35.746	38.627	0.078078078	0.047619048	0.096096096	0.086309524	0.063063063	0.12797619	0.021021021	0.032738095	0.03003003	0.026785714	0.009009009	0.011904762	0.078078078	0.071428571	0.015015015	0.023809524	0.045045045	0.071428571	0.078078078	0.032738095	0.036036036	0.05952381	0.111111111	0.038690476	0.057057057	0.06547619	0.006006006	0.008928571	0.033033033	0.044642857	0.024024024	0.026785714	0.033033033
YGR192C_YDR297W	0	0	7	4	1	0	883815	1056548	882817	1057597	332	349	6.96	8.95	35.746	40.734	0.078078078	0.048571429	0.096096096	0.085714286	0.063063063	0.097142857	0.021021021	0.04	0.03003003	0.088571429	0.009009009	0.017142857	0.078078078	0.071428571	0.015015015	0.034285714	0.045045045	0.062857143	0.078078078	0.028571429	0.036036036	0.042857143	0.111111111	0.051428571	0.057057057	0.057142857	0.006006006	0.002857143	0.033033033	0.048571429	0.024024024	0.051428571	0.033033033
YGR192C_YDR352W	0	0	7	4	1	0	883815	1181795	882817	1182748	332	317	6.96	4.75	35.746	35.179	0.078078078	0.072327044	0.096096096	0.062893082	0.063063063	0.132075472	0.021021021	0.009433962	0.03003003	0.053459119	0.009009009	0.009433962	0.078078078	0.025157233	0.015015015	0.044025157	0.045045045	0.059748428	0.078078078	0.103773585	0.036036036	0.044025157	0.111111111	0.037735849	0.057057057	0.072327044	0.006006006	0.018867925	0.033033033	0.053459119	0.024024024	0.009433962	0.033033033
YGR192C_YDR367W	0	0	7	4	1	0	883815	1212841	882817	1213607	332	221	6.96	8.06	35.746	25.484	0.078078078	0.045045045	0.096096096	0.040540541	0.063063063	0.153153153	0.021021021	0.018018018	0.03003003	0.072072072	0.009009009	0.027027027	0.078078078	0.058558559	0.015015015	0.040540541	0.045045045	0.036036036	0.078078078	0.076576577	0.036036036	0.031531532	0.111111111	0.045045045	0.057057057	0.085585586	0.006006006	0.022522523	0.033033033	0.045045045	0.024024024	0.018018018	0.033033033
YGR192C_YDR411C	0	0	7	4	1	1	883815	1294387	882817	1293362	332	341	6.96	10.44	35.746	38.13	0.078078078	0.093567251	0.096096096	0.046783626	0.063063063	0.084795322	0.021021021	0.026315789	0.03003003	0.058479532	0.009009009	0.026315789	0.078078078	0.01754386	0.015015015	0.038011696	0.045045045	0.01754386	0.078078078	0.087719298	0.036036036	0.055555556	0.111111111	0.049707602	0.057057057	0.073099415	0.006006006	0.014619883	0.033033033	0.049707602	0.024024024	0.011695906	0.033033033
YGR192C_YDR497C	0	0	7	4	1	1	883815	1445460	882817	1443706	332	584	6.96	6.51	35.746	63.569	0.078078078	0.087179487	0.096096096	0.075213675	0.063063063	0.090598291	0.021021021	0.022222222	0.03003003	0.063247863	0.009009009	0.013675214	0.078078078	0.041025641	0.015015015	0.034188034	0.045045045	0.046153846	0.078078078	0.083760684	0.036036036	0.032478632	0.111111111	0.073504274	0.057057057	0.102564103	0.006006006	0.015384615	0.033033033	0.025641026	0.024024024	0.013675214	0.033033033
YGR192C_YDR530C	0	0	7	4	1	1	883815	1497761	882817	1496784	332	325	6.96	5.3	35.746	36.841	0.078078078	0.036809816	0.096096096	0.049079755	0.063063063	0.116564417	0.021021021	0.024539877	0.03003003	0.04601227	0.009009009	0.009202454	0.078078078	0.085889571	0.015015015	0.04601227	0.045045045	0.064417178	0.078078078	0.067484663	0.036036036	0.067484663	0.111111111	0.064417178	0.057057057	0.021472393	0.006006006	0.024539877	0.033033033	0.030674847	0.024024024	0.036809816	0.033033033
YGR192C_YDR541C	0	0	7	4	1	1	883815	1520683	882817	1519649	332	344	6.96	6.4	35.746	38.586	0.078078078	0.052173913	0.096096096	0.069565217	0.063063063	0.098550725	0.021021021	0.008695652	0.03003003	0.052173913	0.009009009	0.008695652	0.078078078	0.069565217	0.015015015	0.034782609	0.045045045	0.066666667	0.078078078	0.063768116	0.036036036	0.037681159	0.111111111	0.066666667	0.057057057	0.069565217	0.006006006	0.008695652	0.033033033	0.020289855	0.024024024	0.04057971	0.033033033
YGR192C_YEL075C	0	0	7	5	1	1	883815	5713	882817	5345	332	122	6.96	8.4	35.746	13.994	0.078078078	0.048780488	0.096096096	0.032520325	0.063063063	0.048780488	0.021021021	0.024390244	0.03003003	0.089430894	0.009009009	0	0.078078078	0.105691057	0.015015015	0.016260163	0.045045045	0.089430894	0.078078078	0.089430894	0.036036036	0.048780488	0.111111111	0.105691057	0.057057057	0.048780488	0.006006006	0.008130081	0.033033033	0.016260163	0.024024024	0.016260163	0.033033033
YGR192C_YER020W	0	0	7	5	1	0	883815	195167	882817	196516	332	449	6.96	6.39	35.746	50.447	0.078078078	0.048888889	0.096096096	0.055555556	0.063063063	0.084444444	0.021021021	0.022222222	0.03003003	0.037777778	0.009009009	0.008888889	0.078078078	0.055555556	0.015015015	0.077777778	0.045045045	0.053333333	0.078078078	0.093333333	0.036036036	0.044444444	0.111111111	0.055555556	0.057057057	0.062222222	0.006006006	0.008888889	0.033033033	0.028888889	0.024024024	0.011111111	0.033033033
YGR192C_YER021W	0	0	7	5	1	0	883815	196947	882817	198518	332	523	6.96	5.37	35.746	60.392	0.078078078	0.022900763	0.096096096	0.041984733	0.063063063	0.135496183	0.021021021	0.02480916	0.03003003	0.040076336	0.009009009	0.005725191	0.078078078	0.076335878	0.015015015	0.038167939	0.045045045	0.06870229	0.078078078	0.097328244	0.036036036	0.020992366	0.111111111	0.045801527	0.057057057	0.06870229	0.006006006	0.013358779	0.033033033	0.04389313	0.024024024	0.02480916	0.033033033
YGR192C_YER118C	0	0	7	5	1	1	883815	399051	882817	397948	332	367	6.96	5.44	35.746	41.125	0.078078078	0.057065217	0.096096096	0.078804348	0.063063063	0.057065217	0.021021021	0.016304348	0.03003003	0.046195652	0.009009009	0.019021739	0.078078078	0.032608696	0.015015015	0.035326087	0.045045045	0.035326087	0.078078078	0.100543478	0.036036036	0.043478261	0.111111111	0.035326087	0.057057057	0.089673913	0.006006006	0.005434783	0.033033033	0.051630435	0.024024024	0.016304348	0.033033033
YGR192C_YER144C	0	0	7	5	1	1	883815	460218	882817	457801	332	805	6.96	8.28	35.746	92.26	0.078078078	0.037220844	0.096096096	0.038461538	0.063063063	0.104218362	0.021021021	0.018610422	0.03003003	0.054590571	0.009009009	0.007444169	0.078078078	0.05707196	0.015015015	0.063275434	0.045045045	0.045905707	0.078078078	0.086848635	0.036036036	0.064516129	0.111111111	0.049627792	0.057057057	0.064516129	0.006006006	0.024813896	0.033033033	0.035980149	0.024024024	0.024813896	0.033033033
YGR192C_YER186C	0	0	7	5	1	1	883815	562620	882817	561700	332	306	6.96	7.25	35.746	35.911	0.078078078	0.045602606	0.096096096	0.026058632	0.063063063	0.074918567	0.021021021	0.026058632	0.03003003	0.087947883	0.009009009	0.016286645	0.078078078	0.09771987	0.015015015	0.016286645	0.045045045	0.078175896	0.078078078	0.06514658	0.036036036	0.048859935	0.111111111	0.06514658	0.057057057	0.06514658	0.006006006	0.029315961	0.033033033	0.035830619	0.024024024	0.016286645	0.033033033
YGR192C_YER189W	0	0	7	5	1	0	883815	571150	882817	571518	332	122	6.96	7.46	35.746	14.008	0.078078078	0.048780488	0.096096096	0.032520325	0.063063063	0.048780488	0.021021021	0.024390244	0.03003003	0.089430894	0.009009009	0	0.078078078	0.097560976	0.015015015	0.024390244	0.045045045	0.089430894	0.078078078	0.089430894	0.036036036	0.048780488	0.111111111	0.097560976	0.057057057	0.056910569	0.006006006	0.008130081	0.033033033	0.016260163	0.024024024	0.016260163	0.033033033
YGR192C_YFL031W	0	1	7	6	1	0	883815	75177	882817	76145	332	238	6.96	4.82	35.746	26.904	0.078078078	0.012552301	0.096096096	0.075313808	0.063063063	0.112970711	0.021021021	0.020920502	0.03003003	0.046025105	0.009009009	0.008368201	0.078078078	0.046025105	0.015015015	0.033472803	0.045045045	0.079497908	0.078078078	0.121338912	0.036036036	0.054393305	0.111111111	0.020920502	0.057057057	0.025104603	0.006006006	0.016736402	0.033033033	0.008368201	0.024024024	0.020920502	0.033033033
YGR192C_YFL064C	0	0	7	6	1	1	883815	3846	882817	3322	332	174	6.96	9.18	35.746	20.427	0.078078078	0.04	0.096096096	0.028571429	0.063063063	0.085714286	0.021021021	0.022857143	0.03003003	0.085714286	0.009009009	0	0.078078078	0.091428571	0.015015015	0.028571429	0.045045045	0.074285714	0.078078078	0.074285714	0.036036036	0.045714286	0.111111111	0.068571429	0.057057057	0.045714286	0.006006006	0.017142857	0.033033033	0.051428571	0.024024024	0.017142857	0.033033033
YGR192C_YFL065C	0	0	7	6	1	1	883815	3338	882817	3030	332	102	6.96	9.82	35.746	11.785	0.078078078	0.038834951	0.096096096	0.038834951	0.063063063	0.106796117	0.021021021	0.038834951	0.03003003	0.048543689	0.009009009	0	0.078078078	0.087378641	0.015015015	0.029126214	0.045045045	0.038834951	0.078078078	0.077669903	0.036036036	0.058252427	0.111111111	0.058252427	0.057057057	0.058252427	0.006006006	0.038834951	0.033033033	0.038834951	0.024024024	0.019417476	0.033033033
YGR192C_YFR005C	0	0	7	6	1	1	883815	155868	882817	154522	332	448	6.96	7.13	35.746	52.166	0.078078078	0.028953229	0.096096096	0.028953229	0.063063063	0.111358575	0.021021021	0.006681514	0.03003003	0.064587973	0.009009009	0.013363029	0.078078078	0.084632517	0.015015015	0.033407572	0.045045045	0.071269488	0.078078078	0.077951002	0.036036036	0.042316258	0.111111111	0.071269488	0.057057057	0.06013363	0.006006006	0.022271715	0.033033033	0.031180401	0.024024024	0.042316258	0.033033033
YGR192C_YGL059W	0	0	7	7	1	0	883815	392228	882817	393703	332	491	6.96	8.12	35.746	57.356	0.078078078	0.040650407	0.096096096	0.032520325	0.063063063	0.115853659	0.021021021	0.028455285	0.03003003	0.042682927	0.009009009	0.004065041	0.078078078	0.077235772	0.015015015	0.038617886	0.045045045	0.073170732	0.078078078	0.073170732	0.036036036	0.044715447	0.111111111	0.048780488	0.057057057	0.071138211	0.006006006	0.010162602	0.033033033	0.069105691	0.024024024	0.034552846	0.033033033
YGR192C_YGL067W	0	0	7	7	1	0	883815	376104	882817	377258	332	384	6.96	6.26	35.746	43.516	0.078078078	0.051948052	0.096096096	0.041558442	0.063063063	0.085714286	0.021021021	0.01038961	0.03003003	0.05974026	0.009009009	0.012987013	0.078078078	0.05974026	0.015015015	0.025974026	0.045045045	0.05974026	0.078078078	0.090909091	0.036036036	0.044155844	0.111111111	0.057142857	0.057057057	0.075324675	0.006006006	0.033766234	0.033033033	0.041558442	0.024024024	0.015584416	0.033033033
YGR192C_YGL082W	0	0	7	7	1	0	883815	355830	882817	356975	332	381	6.96	6.21	35.746	43.321	0.078078078	0.062827225	0.096096096	0.04973822	0.063063063	0.089005236	0.021021021	0.018324607	0.03003003	0.039267016	0.009009009	0.005235602	0.078078078	0.054973822	0.015015015	0.07591623	0.045045045	0.070680628	0.078078078	0.070680628	0.036036036	0.028795812	0.111111111	0.057591623	0.057057057	0.04973822	0.006006006	0.007853403	0.033033033	0.041884817	0.024024024	0.018324607	0.033033033
YGR192C_YGL088W	NA	NA	NA	NA	NA	NA	NA	NA	NA	NA	NA	NA	NA	NA	NA	NA	NA	NA	NA	NA	NA	NA	NA	NA	NA	NA	NA	NA	NA	NA	NA	NA	NA	NA	NA	NA	NA	NA	NA	NA	NA	NA	NA	NA	NA	NA	NA	NA	NA
YGR192C_YGL096W	0	0	7	7	1	0	883815	325334	882817	326164	332	276	6.96	11.05	35.746	31.257	0.078078078	0.054151625	0.096096096	0.036101083	0.063063063	0.054151625	0.021021021	0.018050542	0.03003003	0.039711191	0.009009009	0.007220217	0.078078078	0.057761733	0.015015015	0.054151625	0.045045045	0.057761733	0.078078078	0.097472924	0.036036036	0.086642599	0.111111111	0.061371841	0.057057057	0.075812274	0.006006006	0	0.033033033	0.032490975	0.024024024	0.028880866	0.033033033
YGR192C_YGL126W	0	0	7	7	1	0	883815	271003	882817	272145	332	380	6.96	10.62	35.746	42.735	0.078078078	0.086614173	0.096096096	0.102362205	0.063063063	0.120734908	0.021021021	0.023622047	0.03003003	0.039370079	0.009009009	0.044619423	0.078078078	0.020997375	0.015015015	0.044619423	0.045045045	0.01312336	0.078078078	0.034120735	0.036036036	0.031496063	0.111111111	0.081364829	0.057057057	0.044619423	0.006006006	0.026246719	0.033033033	0.028871391	0.024024024	0.049868766	0.033033033
YGR192C_YGL136C	0	0	7	7	1	1	883815	253864	882817	252902	332	320	6.96	9.67	35.746	37.423	0.078078078	0.034267913	0.096096096	0.046728972	0.063063063	0.090342679	0.021021021	0.021806854	0.03003003	0.046728972	0.009009009	0.012461059	0.078078078	0.065420561	0.015015015	0.043613707	0.045045045	0.049844237	0.078078078	0.07788162	0.036036036	0.037383178	0.111111111	0.049844237	0.057057057	0.068535826	0.006006006	0.009345794	0.033033033	0.043613707	0.024024024	0.031152648	0.033033033
YGR192C_YGL155W	0	0	7	7	1	0	883815	214086	882817	215216	332	376	6.96	6.31	35.746	42.689	0.078078078	0.061007958	0.096096096	0.050397878	0.063063063	0.111405836	0.021021021	0.023872679	0.03003003	0.058355438	0.009009009	0.01061008	0.078078078	0.058355438	0.015015015	0.031830239	0.045045045	0.050397878	0.078078078	0.092838196	0.036036036	0.018567639	0.111111111	0.039787798	0.057057057	0.050397878	0.006006006	0.045092838	0.033033033	0.042440318	0.024024024	0.034482759	0.033033033
YGR192C_YGL167C	0	0	7	7	1	1	883815	190474	882817	187622	332	950	6.96	5.45	35.746	104.57	0.078078078	0.057833859	0.096096096	0.063091483	0.063063063	0.110410095	0.021021021	0.032597266	0.03003003	0.045215563	0.009009009	0.004206099	0.078078078	0.066246057	0.015015015	0.023133544	0.045045045	0.060988433	0.078078078	0.078864353	0.036036036	0.036803365	0.111111111	0.07360673	0.057057057	0.077812829	0.006006006	0.014721346	0.033033033	0.012618297	0.024024024	0.013669821	0.033033033
YGR192C_YGR024C	0	0	7	7	1	1	883815	532600	882817	531887	332	237	6.96	8.21	35.746	27.757	0.078078078	0.042016807	0.096096096	0.046218487	0.063063063	0.096638655	0.021021021	0.012605042	0.03003003	0.084033613	0.009009009	0.012605042	0.078078078	0.096638655	0.015015015	0.029411765	0.045045045	0.071428571	0.078078078	0.058823529	0.036036036	0.033613445	0.111111111	0.042016807	0.057057057	0.071428571	0.006006006	0.025210084	0.033033033	0.054621849	0.024024024	0.021008403	0.033033033
YGR192C_YGR077C	0	0	7	7	1	1	883815	639517	882817	637748	332	589	6.96	7.62	35.746	68.165	0.078078078	0.020338983	0.096096096	0.040677966	0.063063063	0.152542373	0.021021021	0.018644068	0.03003003	0.047457627	0.009009009	0.020338983	0.078078078	0.050847458	0.015015015	0.045762712	0.045045045	0.042372881	0.078078078	0.088135593	0.036036036	0.028813559	0.111111111	0.076271186	0.057057057	0.079661017	0.006006006	0.011864407	0.033033033	0.042372881	0.024024024	0.03220339	0.033033033
YGR192C_YGR093W	0	0	7	7	1	0	883815	670392	882817	671915	332	507	6.96	6.18	35.746	58.206	0.078078078	0.035433071	0.096096096	0.049212598	0.063063063	0.096456693	0.021021021	0.013779528	0.03003003	0.051181102	0.009009009	0.007874016	0.078078078	0.084645669	0.015015015	0.037401575	0.045045045	0.080708661	0.078078078	0.080708661	0.036036036	0.045275591	0.111111111	0.043307087	0.057057057	0.076771654	0.006006006	0.017716535	0.033033033	0.039370079	0.024024024	0.021653543	0.033033033
YGR192C_YGR097W	0	0	7	7	1	0	883815	678699	882817	682139	332	1146	6.96	10.11	35.746	126.863	0.078078078	0.050566696	0.096096096	0.06277245	0.063063063	0.069747167	0.021021021	0.02179599	0.03003003	0.035745423	0.009009009	0.004359198	0.078078078	0.078465562	0.015015015	0.058413252	0.045045045	0.039232781	0.078078078	0.122057541	0.036036036	0.058413252	0.111111111	0.04097646	0.057057057	0.053182214	0.006006006	0.006102877	0.033033033	0.037489102	0.024024024	0.027898867	0.033033033
YGR192C_YGR157W	0	0	7	7	1	0	883815	802445	882817	805054	332	869	6.96	8.56	35.746	101.203	0.078078078	0.052873563	0.096096096	0.031034483	0.063063063	0.108045977	0.021021021	0.01954023	0.03003003	0.068965517	0.009009009	0.025287356	0.078078078	0.06091954	0.015015015	0.031034483	0.045045045	0.048275862	0.078078078	0.077011494	0.036036036	0.026436782	0.111111111	0.068965517	0.057057057	0.079310345	0.006006006	0.009195402	0.033033033	0.057471264	0.024024024	0.020689655	0.033033033
YGR192C_YGR281W	0	0	7	7	1	0	883815	1052831	882817	1057264	332	1477	6.96	7.65	35.746	166.727	0.078078078	0.059539919	0.096096096	0.066982409	0.063063063	0.103518268	0.021021021	0.034506089	0.03003003	0.057510149	0.009009009	0.01082544	0.078078078	0.072395129	0.015015015	0.028416779	0.045045045	0.064276049	0.078078078	0.066982409	0.036036036	0.035859269	0.111111111	0.058186739	0.057057057	0.079161028	0.006006006	0.01150203	0.033033033	0.027063599	0.024024024	0.01285521	0.033033033
YGR192C_YHL009C	0	1	7	8	1	1	883815	85056	882817	84064	332	330	6.96	4.87	35.746	37.955	0.078078078	0.027190332	0.096096096	0.051359517	0.063063063	0.090634441	0.021021021	0.024169184	0.03003003	0.039274924	0.009009009	0.003021148	0.078078078	0.075528701	0.015015015	0.051359517	0.045045045	0.087613293	0.078078078	0.090634441	0.036036036	0.045317221	0.111111111	0.027190332	0.057057057	0.039274924	0.006006006	0.021148036	0.033033033	0.036253776	0.024024024	0.01510574	0.033033033
YGR192C_YHL049C	0	0	7	8	1	1	883815	4540	882817	3725	332	271	6.96	9.67	35.746	31.505	0.078078078	0.036764706	0.096096096	0.033088235	0.063063063	0.091911765	0.021021021	0.029411765	0.03003003	0.069852941	0.009009009	0	0.078078078	0.091911765	0.015015015	0.022058824	0.045045045	0.0625	0.078078078	0.080882353	0.036036036	0.047794118	0.111111111	0.073529412	0.057057057	0.047794118	0.006006006	0.022058824	0.033033033	0.040441176	0.024024024	0.022058824	0.033033033
YGR192C_YHR030C	0	0	7	8	1	1	883815	170337	882817	168883	332	484	6.96	5.07	35.746	55.636	0.078078078	0.049484536	0.096096096	0.059793814	0.063063063	0.098969072	0.021021021	0.024742268	0.03003003	0.051546392	0.009009009	0.006185567	0.078078078	0.053608247	0.015015015	0.094845361	0.045045045	0.068041237	0.078078078	0.051546392	0.036036036	0.053608247	0.111111111	0.051546392	0.057057057	0.053608247	0.006006006	0.018556701	0.033033033	0.039175258	0.024024024	0.026804124	0.033033033
YGR192C_YHR078W	0	0	7	8	1	0	883815	256362	882817	258020	332	552	6.96	7.38	35.746	63.33	0.078078078	0.03074141	0.096096096	0.048824593	0.063063063	0.119349005	0.021021021	0.021699819	0.03003003	0.068716094	0.009009009	0.014466546	0.078078078	0.063291139	0.015015015	0.032549729	0.045045045	0.054249548	0.078078078	0.09403255	0.036036036	0.027124774	0.111111111	0.068716094	0.057057057	0.101265823	0.006006006	0.012658228	0.033033033	0.047016275	0.024024024	0.012658228	0.033033033
YGR192C_YHR175W-A	NA	NA	NA	NA	NA	NA	NA	NA	NA	NA	NA	NA	NA	NA	NA	NA	NA	NA	NA	NA	NA	NA	NA	NA	NA	NA	NA	NA	NA	NA	NA	NA	NA	NA	NA	NA	NA	NA	NA	NA	NA	NA	NA	NA	NA	NA	NA	NA	NA
YGR192C_YHR188C	0	0	7	8	1	1	883815	483837	882817	482005	332	610	6.96	5.02	35.746	68.771	0.078078078	0.047463175	0.096096096	0.057283142	0.063063063	0.126022913	0.021021021	0.027823241	0.03003003	0.057283142	0.009009009	0.01309329	0.078078078	0.044189853	0.015015015	0.034369885	0.045045045	0.050736498	0.078078078	0.090016367	0.036036036	0.060556465	0.111111111	0.039279869	0.057057057	0.05400982	0.006006006	0.01309329	0.033033033	0.034369885	0.024024024	0.021276596	0.033033033
YGR192C_YHR204W	0	0	7	8	1	0	883815	506319	882817	508709	332	796	6.96	4.82	35.746	91.245	0.078078078	0.048933501	0.096096096	0.055207026	0.063063063	0.112923463	0.021021021	0.022584693	0.03003003	0.067754078	0.009009009	0.015056462	0.078078078	0.048933501	0.015015015	0.025094103	0.045045045	0.067754078	0.078078078	0.066499373	0.036036036	0.058971142	0.111111111	0.04391468	0.057057057	0.062735257	0.006006006	0.013801757	0.033033033	0.04391468	0.024024024	0.025094103	0.033033033
YGR192C_YIL039W	0	0	7	9	1	0	883815	278425	882817	279846	332	473	6.96	5.58	35.746	54.927	0.078078078	0.061181435	0.096096096	0.037974684	0.063063063	0.075949367	0.021021021	0.018987342	0.03003003	0.061181435	0.009009009	0.033755274	0.078078078	0.054852321	0.015015015	0.037974684	0.045045045	0.063291139	0.078078078	0.065400844	0.036036036	0.040084388	0.111111111	0.05907173	0.057057057	0.05907173	0.006006006	0.012658228	0.033033033	0.046413502	0.024024024	0.037974684	0.033033033
YGR192C_YIL090W	0	0	7	9	1	0	883815	193592	882817	195067	332	491	6.96	9.14	35.746	56.332	0.078078078	0.054878049	0.096096096	0.040650407	0.063063063	0.130081301	0.021021021	0.014227642	0.03003003	0.075203252	0.009009009	0.026422764	0.078078078	0.052845528	0.015015015	0.030487805	0.045045045	0.036585366	0.078078078	0.099593496	0.036036036	0.028455285	0.111111111	0.056910569	0.057057057	0.087398374	0.006006006	0.028455285	0.033033033	0.054878049	0.024024024	0.012195122	0.033033033
YGR192C_YIL116W	0	0	7	9	1	0	883815	142925	882817	144082	332	385	6.96	6.37	35.746	42.646	0.078078078	0.059585492	0.096096096	0.07253886	0.063063063	0.119170984	0.021021021	0.023316062	0.03003003	0.025906736	0.009009009	0.002590674	0.078078078	0.07253886	0.015015015	0.023316062	0.045045045	0.059585492	0.078078078	0.056994819	0.036036036	0.044041451	0.111111111	0.07253886	0.057057057	0.056994819	0.006006006	0.023316062	0.033033033	0.046632124	0.024024024	0.012953368	0.033033033
YGR192C_YIL121W	0	0	7	9	1	0	883815	132241	882817	133869	332	542	6.96	9.64	35.746	59.617	0.078078078	0.071823204	0.096096096	0.092081031	0.063063063	0.127071823	0.021021021	0.016574586	0.03003003	0.064456722	0.009009009	0.011049724	0.078078078	0.049723757	0.015015015	0.025782689	0.045045045	0.040515654	0.078078078	0.075506446	0.036036036	0.036832413	0.111111111	0.066298343	0.057057057	0.073664825	0.006006006	0.027624309	0.033033033	0.036832413	0.024024024	0.009208103	0.033033033
YGR192C_YJL002C	0	0	7	10	1	1	883815	434644	882817	433214	332	476	6.96	4.88	35.746	54.071	0.078078078	0.048218029	0.096096096	0.056603774	0.063063063	0.081761006	0.021021021	0.014675052	0.03003003	0.07966457	0.009009009	0.018867925	0.078078078	0.044025157	0.015015015	0.031446541	0.045045045	0.06918239	0.078078078	0.098532495	0.036036036	0.052410901	0.111111111	0.064989518	0.057057057	0.064989518	0.006006006	0.004192872	0.033033033	0.044025157	0.024024024	0.023060797	0.033033033
YGR192C_YJL044C	0	0	7	10	1	1	883815	359670	882817	358294	332	458	6.96	6.21	35.746	53.814	0.078078078	0.037037037	0.096096096	0.021786492	0.063063063	0.14379085	0.021021021	0.015250545	0.03003003	0.043572985	0.009009009	0.019607843	0.078078078	0.082788671	0.015015015	0.039215686	0.045045045	0.063180828	0.078078078	0.050108932	0.036036036	0.030501089	0.111111111	0.052287582	0.057057057	0.076252723	0.006006006	0.015250545	0.033033033	0.034858388	0.024024024	0.034858388	0.033033033
YGR192C_YJL091C	0	0	7	10	1	1	883815	262546	882817	261074	332	490	6.96	10.14	35.746	55.466	0.078078078	0.050916497	0.096096096	0.048879837	0.063063063	0.152749491	0.021021021	0.016293279	0.03003003	0.075356415	0.009009009	0.020366599	0.078078078	0.054989817	0.015015015	0.018329939	0.045045045	0.026476578	0.078078078	0.099796334	0.036036036	0.038696538	0.111111111	0.061099796	0.057057057	0.079429735	0.006006006	0.018329939	0.033033033	0.048879837	0.024024024	0.00610998	0.033033033
YGR192C_YJL127C-B	NA	NA	NA	NA	NA	NA	NA	NA	NA	NA	NA	NA	NA	NA	NA	NA	NA	NA	NA	NA	NA	NA	NA	NA	NA	NA	NA	NA	NA	NA	NA	NA	NA	NA	NA	NA	NA	NA	NA	NA	NA	NA	NA	NA	NA	NA	NA	NA	NA
YGR192C_YJL154C	0	0	7	10	1	1	883815	133931	882817	131097	332	944	6.96	6.23	35.746	109.141	0.078078078	0.026455026	0.096096096	0.037037037	0.063063063	0.133333333	0.021021021	0.022222222	0.03003003	0.037037037	0.009009009	0.008465608	0.078078078	0.06031746	0.015015015	0.058201058	0.045045045	0.064550265	0.078078078	0.083597884	0.036036036	0.02962963	0.111111111	0.051851852	0.057057057	0.082539683	0.006006006	0.019047619	0.033033033	0.039153439	0.024024024	0.026455026	0.033033033
YGR192C_YJL225C	0	0	7	10	1	1	883815	6130	882817	466	332	1758	6.96	7.47	35.746	197.563	0.078078078	0.05059693	0.096096096	0.068789085	0.063063063	0.087549744	0.021021021	0.019897669	0.03003003	0.040363843	0.009009009	0.010233087	0.078078078	0.056850483	0.015015015	0.030130756	0.045045045	0.06935759	0.078078078	0.092666288	0.036036036	0.028993746	0.111111111	0.061967027	0.057057057	0.046617396	0.006006006	0.017055145	0.033033033	0.035815804	0.024024024	0.017055145	0.033033033
YGR192C_YJR001W	0	0	7	10	1	0	883815	436795	882817	438603	332	602	6.96	8.04	35.746	65.345	0.078078078	0.072968491	0.096096096	0.071310116	0.063063063	0.119402985	0.021021021	0.021558872	0.03003003	0.056384743	0.009009009	0.008291874	0.078078078	0.039800995	0.015015015	0.016583748	0.045045045	0.026533997	0.078078078	0.089552239	0.036036036	0.048092869	0.111111111	0.069651741	0.057057057	0.084577114	0.006006006	0.023217247	0.033033033	0.019900498	0.024024024	0.013266998	0.033033033
YGR192C_YJR046W	0	0	7	10	1	0	883815	522040	882817	523854	332	604	6.96	8.71	35.746	68.405	0.078078078	0.036363636	0.096096096	0.061157025	0.063063063	0.125619835	0.021021021	0.023140496	0.03003003	0.039669421	0.009009009	0.011570248	0.078078078	0.061157025	0.015015015	0.054545455	0.045045045	0.044628099	0.078078078	0.090909091	0.036036036	0.042975207	0.111111111	0.05785124	0.057057057	0.047933884	0.006006006	0.011570248	0.033033033	0.029752066	0.024024024	0.014876033	0.033033033
YGR192C_YJR054W	0	0	7	10	1	0	883815	536048	882817	537541	332	497	6.96	8.11	35.746	57.516	0.078078078	0.03815261	0.096096096	0.030120482	0.063063063	0.086345382	0.021021021	0.022088353	0.03003003	0.064257028	0.009009009	0.014056225	0.078078078	0.074297189	0.015015015	0.024096386	0.045045045	0.0562249	0.078078078	0.092369478	0.036036036	0.036144578	0.111111111	0.048192771	0.057057057	0.088353414	0.006006006	0.014056225	0.033033033	0.046184739	0.024024024	0.010040161	0.033033033
YGR192C_YJR075W	0	0	7	10	1	0	883815	573973	882817	575163	332	396	6.96	8.43	35.746	46.297	0.078078078	0.032745592	0.096096096	0.050377834	0.063063063	0.088161209	0.021021021	0.01511335	0.03003003	0.062972292	0.009009009	0.025188917	0.078078078	0.068010076	0.015015015	0.062972292	0.045045045	0.055415617	0.078078078	0.062972292	0.036036036	0.052896725	0.111111111	0.050377834	0.057057057	0.093198992	0.006006006	0.002518892	0.033033033	0.025188917	0.024024024	0.032745592	0.033033033
YGR192C_YJR124C	0	0	7	10	1	1	883815	654228	882817	652882	332	448	6.96	7.53	35.746	49.663	0.078078078	0.06013363	0.096096096	0.077951002	0.063063063	0.142538976	0.021021021	0.04454343	0.03003003	0.062360802	0.009009009	0.011135857	0.078078078	0.042316258	0.015015015	0.017817372	0.045045045	0.035634744	0.078078078	0.073496659	0.036036036	0.035634744	0.111111111	0.066815145	0.057057057	0.084632517	0.006006006	0.024498886	0.033033033	0.031180401	0.024024024	0.017817372	0.033033033
YGR192C_YKL039W	0	0	7	11	1	0	883815	362265	882817	363836	332	523	6.96	4.86	35.746	60.018	0.078078078	0.049618321	0.096096096	0.061068702	0.063063063	0.103053435	0.021021021	0.030534351	0.03003003	0.072519084	0.009009009	0.011450382	0.078078078	0.053435115	0.015015015	0.036259542	0.045045045	0.045801527	0.078078078	0.059160305	0.036036036	0.038167939	0.111111111	0.066793893	0.057057057	0.080152672	0.006006006	0.017175573	0.033033033	0.064885496	0.024024024	0.013358779	0.033033033
YGR192C_YKL224C	0	0	7	11	1	1	883815	2182	882817	1811	332	123	6.96	5.07	35.746	13.048	0.078078078	0.056451613	0.096096096	0.161290323	0.063063063	0.072580645	0.021021021	0.016129032	0.03003003	0.024193548	0.009009009	0.008064516	0.078078078	0.016129032	0.015015015	0.024193548	0.045045045	0.048387097	0.078078078	0.072580645	0.036036036	0.056451613	0.111111111	0.096774194	0.057057057	0.072580645	0.006006006	0	0.033033033	0.056451613	0.024024024	0.016129032	0.033033033
YGR192C_YKR052C	0	0	7	11	1	1	883815	533106	882817	532192	332	304	6.96	8	35.746	33.307	0.078078078	0.062295082	0.096096096	0.124590164	0.063063063	0.081967213	0.021021021	0.042622951	0.03003003	0.049180328	0.009009009	0.016393443	0.078078078	0.049180328	0.015015015	0.039344262	0.045045045	0.045901639	0.078078078	0.072131148	0.036036036	0.045901639	0.111111111	0.039344262	0.057057057	0.075409836	0.006006006	0.019672131	0.033033033	0.032786885	0.024024024	0.026229508	0.033033033
YGR192C_YLR130C	0	0	7	12	1	1	883815	404063	882817	402795	332	422	6.96	4.93	35.746	46.363	0.078078078	0.082742317	0.096096096	0.082742317	0.063063063	0.104018913	0.021021021	0.023640662	0.03003003	0.066193853	0.009009009	0.014184397	0.078078078	0.033096927	0.015015015	0.01891253	0.045045045	0.063829787	0.078078078	0.080378251	0.036036036	0.040189125	0.111111111	0.066193853	0.057057057	0.073286052	0.006006006	0.014184397	0.033033033	0.033096927	0.024024024	0.035460993	0.033033033
YGR192C_YLR155C	0	0	7	12	1	1	883815	470406	882817	469318	332	362	6.96	4.53	35.746	38.686	0.078078078	0.096418733	0.096096096	0.08815427	0.063063063	0.099173554	0.021021021	0.022038567	0.03003003	0.03030303	0.009009009	0.008264463	0.078078078	0.035812672	0.015015015	0.024793388	0.045045045	0.049586777	0.078078078	0.101928375	0.036036036	0.049586777	0.111111111	0.05785124	0.057057057	0.066115702	0.006006006	0.005509642	0.033033033	0.052341598	0.024024024	0.011019284	0.033033033
YGR192C_YLR157C	0	0	7	12	1	1	883815	474058	882817	472970	332	362	6.96	4.53	35.746	38.686	0.078078078	0.096418733	0.096096096	0.08815427	0.063063063	0.099173554	0.021021021	0.022038567	0.03003003	0.03030303	0.009009009	0.008264463	0.078078078	0.035812672	0.015015015	0.024793388	0.045045045	0.049586777	0.078078078	0.101928375	0.036036036	0.049586777	0.111111111	0.05785124	0.057057057	0.066115702	0.006006006	0.005509642	0.033033033	0.052341598	0.024024024	0.011019284	0.033033033
YGR192C_YLR158C	0	0	7	12	1	1	883815	483638	882817	482550	332	362	6.96	4.53	35.746	38.686	0.078078078	0.096418733	0.096096096	0.08815427	0.063063063	0.099173554	0.021021021	0.022038567	0.03003003	0.03030303	0.009009009	0.008264463	0.078078078	0.035812672	0.015015015	0.024793388	0.045045045	0.049586777	0.078078078	0.101928375	0.036036036	0.049586777	0.111111111	0.05785124	0.057057057	0.066115702	0.006006006	0.005509642	0.033033033	0.052341598	0.024024024	0.011019284	0.033033033
YGR192C_YLR178C	0	0	7	12	1	1	883815	513823	882817	513164	332	219	6.96	6.52	35.746	24.357	0.078078078	0.059090909	0.096096096	0.081818182	0.063063063	0.063636364	0.021021021	0.022727273	0.03003003	0.063636364	0.009009009	0.013636364	0.078078078	0.086363636	0.015015015	0.05	0.045045045	0.054545455	0.078078078	0.086363636	0.036036036	0.068181818	0.111111111	0.05	0.057057057	0.031818182	0.006006006	0.009090909	0.033033033	0.036363636	0.024024024	0.027272727	0.033033033
YGR192C_YLR224W	0	0	7	12	1	0	883815	586466	882817	587575	332	369	6.96	6.83	35.746	42.754	0.078078078	0.043243243	0.096096096	0.045945946	0.063063063	0.1	0.021021021	0.013513514	0.03003003	0.035135135	0.009009009	0.024324324	0.078078078	0.059459459	0.015015015	0.037837838	0.045045045	0.062162162	0.078078078	0.078378378	0.036036036	0.062162162	0.111111111	0.051351351	0.057057057	0.086486486	0.006006006	0.018918919	0.033033033	0.064864865	0.024024024	0.027027027	0.033033033
YGR192C_YLR265C	0	0	7	12	1	1	883815	675457	882817	674429	332	342	6.96	7.97	35.746	39.115	0.078078078	0.032069971	0.096096096	0.026239067	0.063063063	0.128279883	0.021021021	0.020408163	0.03003003	0.049562682	0.009009009	0.005830904	0.078078078	0.093294461	0.015015015	0.069970845	0.045045045	0.064139942	0.078078078	0.113702624	0.036036036	0.037900875	0.111111111	0.058309038	0.057057057	0.052478134	0.006006006	0.017492711	0.033033033	0.020408163	0.024024024	0.014577259	0.033033033
YGR192C_YLR360W	0	0	7	12	1	0	883815	846102	882817	847421	332	439	6.96	9.72	35.746	50.859	0.078078078	0.038636364	0.096096096	0.029545455	0.063063063	0.134090909	0.021021021	0.018181818	0.03003003	0.043181818	0.009009009	0.004545455	0.078078078	0.086363636	0.015015015	0.05	0.045045045	0.054545455	0.078078078	0.097727273	0.036036036	0.027272727	0.111111111	0.040909091	0.057057057	0.093181818	0.006006006	0.011363636	0.033033033	0.05	0.024024024	0.025	0.033033033
YGR192C_YLR367W	0	0	7	12	1	0	883815	856441	882817	857316	332	130	6.96	10.76	35.746	14.626	0.078078078	0.083969466	0.096096096	0.061068702	0.063063063	0.083969466	0.021021021	0.022900763	0.03003003	0.038167939	0.009009009	0.007633588	0.078078078	0.083969466	0.015015015	0.038167939	0.045045045	0.045801527	0.078078078	0.061068702	0.036036036	0.022900763	0.111111111	0.083969466	0.057057057	0.091603053	0.006006006	0.007633588	0.033033033	0.030534351	0.024024024	0.030534351	0.033033033
YGR192C_YLR375W	0	0	7	12	1	0	883815	871696	882817	872727	332	343	6.96	9.94	35.746	37.718	0.078078078	0.061046512	0.096096096	0.052325581	0.063063063	0.069767442	0.021021021	0.023255814	0.03003003	0.031976744	0.009009009	0.005813953	0.078078078	0.081395349	0.015015015	0.031976744	0.045045045	0.031976744	0.078078078	0.13372093	0.036036036	0.069767442	0.111111111	0.040697674	0.057057057	0.034883721	0.006006006	0.029069767	0.033033033	0.026162791	0.024024024	0.055232558	0.033033033
YGR192C_YLR389C	0	0	7	12	1	1	883815	902660	882817	899577	332	1027	6.96	6.72	35.746	117.578	0.078078078	0.038910506	0.096096096	0.055447471	0.063063063	0.122568093	0.021021021	0.015564202	0.03003003	0.054474708	0.009009009	0.009727626	0.078078078	0.077821012	0.015015015	0.035992218	0.045045045	0.06614786	0.078078078	0.079766537	0.036036036	0.045719844	0.111111111	0.043774319	0.057057057	0.057392996	0.006006006	0.008754864	0.033033033	0.042801556	0.024024024	0.028210117	0.033033033
YGR192C_YLR412W	0	0	7	12	1	0	883815	948366	882817	949190	332	274	6.96	7.17	35.746	31.707	0.078078078	0.021818182	0.096096096	0.058181818	0.063063063	0.105454545	0.021021021	0.007272727	0.03003003	0.054545455	0.009009009	0.010909091	0.078078078	0.112727273	0.015015015	0.025454545	0.045045045	0.072727273	0.078078078	0.072727273	0.036036036	0.050909091	0.111111111	0.047272727	0.057057057	0.065454545	0.006006006	0.010909091	0.033033033	0.043636364	0.024024024	0.025454545	0.033033033
YGR192C_YLR462W	0	0	7	12	1	0	883815	1065954	882817	1066562	332	202	6.96	10.25	35.746	23.494	0.078078078	0.039408867	0.096096096	0.039408867	0.063063063	0.078817734	0.021021021	0.024630542	0.03003003	0.078817734	0.009009009	0	0.078078078	0.093596059	0.015015015	0.014778325	0.045045045	0.064039409	0.078078078	0.083743842	0.036036036	0.039408867	0.111111111	0.083743842	0.057057057	0.044334975	0.006006006	0.009852217	0.033033033	0.049261084	0.024024024	0.014778325	0.033033033
YGR192C_YLR463C	NA	NA	NA	NA	NA	NA	NA	NA	NA	NA	NA	NA	NA	NA	NA	NA	NA	NA	NA	NA	NA	NA	NA	NA	NA	NA	NA	NA	NA	NA	NA	NA	NA	NA	NA	NA	NA	NA	NA	NA	NA	NA	NA	NA	NA	NA	NA	NA	NA
YGR192C_YML019W	0	0	7	13	1	0	883815	233457	882817	234455	332	332	6.96	8.53	35.746	37.89	0.078078078	0.042042042	0.096096096	0.051051051	0.063063063	0.096096096	0.021021021	0.03003003	0.03003003	0.081081081	0.009009009	0.015015015	0.078078078	0.06006006	0.015015015	0.042042042	0.045045045	0.03003003	0.078078078	0.084084084	0.036036036	0.048048048	0.111111111	0.087087087	0.057057057	0.093093093	0.006006006	0.021021021	0.033033033	0.054054054	0.024024024	0.015015015	0.033033033
YGR192C_YML038C	0	0	7	13	1	1	883815	204103	882817	202775	332	442	6.96	7.46	35.746	49.614	0.078078078	0.060948081	0.096096096	0.047404063	0.063063063	0.128668172	0.021021021	0.022573363	0.03003003	0.072234763	0.009009009	0.015801354	0.078078078	0.047404063	0.015015015	0.036117381	0.045045045	0.040632054	0.078078078	0.085778781	0.036036036	0.036117381	0.111111111	0.083521445	0.057057057	0.083521445	0.006006006	0.011286682	0.033033033	0.033860045	0.024024024	0.015801354	0.033033033
YGR192C_YML048W	0	0	7	13	1	0	883815	178426	882817	179637	332	403	6.96	7.14	35.746	45.869	0.078078078	0.056930693	0.096096096	0.079207921	0.063063063	0.103960396	0.021021021	0.01980198	0.03003003	0.044554455	0.009009009	0.017326733	0.078078078	0.084158416	0.015015015	0.024752475	0.045045045	0.074257426	0.078078078	0.056930693	0.036036036	0.044554455	0.111111111	0.042079208	0.057057057	0.079207921	0.006006006	0.004950495	0.033033033	0.044554455	0.024024024	0.014851485	0.033033033
YGR192C_YML051W	0	0	7	13	1	0	883815	171594	882817	172901	332	435	6.96	8.16	35.746	48.323	0.078078078	0.073394495	0.096096096	0.068807339	0.063063063	0.091743119	0.021021021	0.02293578	0.03003003	0.04587156	0.009009009	0.006880734	0.078078078	0.055045872	0.015015015	0.041284404	0.045045045	0.048165138	0.078078078	0.084862385	0.036036036	0.048165138	0.111111111	0.05733945	0.057057057	0.087155963	0.006006006	0.004587156	0.033033033	0.050458716	0.024024024	0.02293578	0.033033033
YGR192C_YMR010W	0	0	7	13	1	0	883815	285099	882817	286316	332	405	6.96	5.76	35.746	46.872	0.078078078	0.034482759	0.096096096	0.051724138	0.063063063	0.140394089	0.021021021	0.017241379	0.03003003	0.078817734	0.009009009	0.019704433	0.078078078	0.061576355	0.015015015	0.04679803	0.045045045	0.032019704	0.078078078	0.088669951	0.036036036	0.034482759	0.111111111	0.034482759	0.057057057	0.093596059	0.006006006	0.009852217	0.033033033	0.054187192	0.024024024	0.012315271	0.033033033
YGR192C_YMR026C	0	0	7	13	1	1	883815	325434	882817	324235	332	399	6.96	9.86	35.746	45.992	0.078078078	0.0475	0.096096096	0.0325	0.063063063	0.125	0.021021021	0.0175	0.03003003	0.06	0.009009009	0.0175	0.078078078	0.07	0.015015015	0.0475	0.045045045	0.055	0.078078078	0.0875	0.036036036	0.05	0.111111111	0.0475	0.057057057	0.0625	0.006006006	0.02	0.033033033	0.0425	0.024024024	0.0125	0.033033033
YGR192C_YMR080C	0	0	7	13	1	1	883815	429626	882817	426711	332	971	6.96	6.45	35.746	109.429	0.078078078	0.054526749	0.096096096	0.060699588	0.063063063	0.101851852	0.021021021	0.014403292	0.03003003	0.040123457	0.009009009	0.013374486	0.078078078	0.061728395	0.015015015	0.051440329	0.045045045	0.067901235	0.078078078	0.082304527	0.036036036	0.04526749	0.111111111	0.066872428	0.057057057	0.055555556	0.006006006	0.019547325	0.033033033	0.028806584	0.024024024	0.022633745	0.033033033
YGR192C_YMR212C	0	0	7	13	1	1	883815	693042	882817	690694	332	782	6.96	7.45	35.746	89.19	0.078078078	0.025542784	0.096096096	0.042145594	0.063063063	0.118773946	0.021021021	0.025542784	0.03003003	0.042145594	0.009009009	0.001277139	0.078078078	0.084291188	0.015015015	0.035759898	0.045045045	0.053639847	0.078078078	0.103448276	0.036036036	0.021711367	0.111111111	0.06385696	0.057057057	0.057471264	0.006006006	0.012771392	0.033033033	0.037037037	0.024024024	0.01660281	0.033033033
YGR192C_YMR243C	0	0	7	13	1	1	883815	756165	882817	754837	332	442	6.96	6.34	35.746	48.344	0.078078078	0.060948081	0.096096096	0.081264108	0.063063063	0.101580135	0.021021021	0.013544018	0.03003003	0.036117381	0.009009009	0.011286682	0.078078078	0.027088036	0.015015015	0.029345372	0.045045045	0.042889391	0.078078078	0.115124153	0.036036036	0.038374718	0.111111111	0.063205418	0.057057057	0.101580135	0.006006006	0.011286682	0.033033033	0.020316027	0.024024024	0.056433409	0.033033033
YGR192C_YMR258C	0	0	7	13	1	1	883815	784280	882817	782619	332	553	6.96	6.36	35.746	64.404	0.078078078	0.041516245	0.096096096	0.032490975	0.063063063	0.140794224	0.021021021	0.019855596	0.03003003	0.057761733	0.009009009	0.012635379	0.078078078	0.07400722	0.015015015	0.030685921	0.045045045	0.055956679	0.078078078	0.07400722	0.036036036	0.034296029	0.111111111	0.045126354	0.057057057	0.064981949	0.006006006	0.018050542	0.033033033	0.050541516	0.024024024	0.027075812	0.033033033
YGR192C_YMR265C	0	0	7	13	1	1	883815	797924	882817	796539	332	461	6.96	9.55	35.746	54.106	0.078078078	0.028138528	0.096096096	0.062770563	0.063063063	0.090909091	0.021021021	0.012987013	0.03003003	0.056277056	0.009009009	0.017316017	0.078078078	0.075757576	0.015015015	0.025974026	0.045045045	0.084415584	0.078078078	0.067099567	0.036036036	0.056277056	0.111111111	0.043290043	0.057057057	0.067099567	0.006006006	0.021645022	0.033033033	0.038961039	0.024024024	0.034632035	0.033033033
YGR192C_YNL048W	0	0	7	14	1	0	883815	538174	882817	539820	332	548	6.96	9.7	35.746	63.143	0.078078078	0.054644809	0.096096096	0.043715847	0.063063063	0.091074681	0.021021021	0.02003643	0.03003003	0.061930783	0.009009009	0.027322404	0.078078078	0.096539162	0.015015015	0.029143898	0.045045045	0.047358834	0.078078078	0.071038251	0.036036036	0.049180328	0.111111111	0.061930783	0.057057057	0.0856102	0.006006006	0.012750455	0.033033033	0.043715847	0.024024024	0.016393443	0.033033033
YGR192C_YNL080C	0	0	7	14	1	1	883815	478033	882817	476933	332	366	6.96	5.87	35.746	41.673	0.078078078	0.029972752	0.096096096	0.057220708	0.063063063	0.138964578	0.021021021	0.029972752	0.03003003	0.032697548	0.009009009	0.019073569	0.078078078	0.049046322	0.015015015	0.027247956	0.045045045	0.054495913	0.078078078	0.108991826	0.036036036	0.040871935	0.111111111	0.0626703	0.057057057	0.049046322	0.006006006	0.013623978	0.033033033	0.046321526	0.024024024	0.024523161	0.033033033
YGR192C_YNL094W	0	0	7	14	1	0	883815	447613	882817	449376	332	587	6.96	6.11	35.746	66.134	0.078078078	0.045918367	0.096096096	0.040816327	0.063063063	0.071428571	0.021021021	0.028911565	0.03003003	0.040816327	0.009009009	0.006802721	0.078078078	0.052721088	0.015015015	0.039115646	0.045045045	0.047619048	0.078078078	0.100340136	0.036036036	0.076530612	0.111111111	0.049319728	0.057057057	0.06292517	0.006006006	0.008503401	0.033033033	0.037414966	0.024024024	0.015306122	0.033033033
YGR192C_YNL101W	0	0	7	14	1	0	883815	435001	882817	437142	332	713	6.96	10.12	35.746	80.025	0.078078078	0.058823529	0.096096096	0.049019608	0.063063063	0.105042017	0.021021021	0.028011204	0.03003003	0.075630252	0.009009009	0.008403361	0.078078078	0.049019608	0.015015015	0.022408964	0.045045045	0.030812325	0.078078078	0.105042017	0.036036036	0.049019608	0.111111111	0.06442577	0.057057057	0.092436975	0.006006006	0.005602241	0.033033033	0.030812325	0.024024024	0.021008403	0.033033033
YGR192C_YNL119W	0	0	7	14	1	0	883815	401042	882817	402523	332	493	6.96	6.34	35.746	56.472	0.078078078	0.028340081	0.096096096	0.028340081	0.063063063	0.0951417	0.021021021	0.024291498	0.03003003	0.046558704	0.009009009	0.008097166	0.078078078	0.091093117	0.015015015	0.048582996	0.045045045	0.072874494	0.078078078	0.097165992	0.036036036	0.028340081	0.111111111	0.060728745	0.057057057	0.08097166	0.006006006	0.022267206	0.033033033	0.028340081	0.024024024	0.016194332	0.033033033
YGR192C_YNL169C	0	0	7	14	1	1	883815	317673	882817	316171	332	500	6.96	9.84	35.746	56.594	0.078078078	0.071856287	0.096096096	0.0499002	0.063063063	0.095808383	0.021021021	0.027944112	0.03003003	0.065868263	0.009009009	0.015968064	0.078078078	0.063872255	0.015015015	0.033932136	0.045045045	0.05988024	0.078078078	0.085828343	0.036036036	0.043912176	0.111111111	0.073852295	0.057057057	0.041916168	0.006006006	0.00998004	0.033033033	0.025948104	0.024024024	0.023952096	0.033033033
YGR192C_YNL234W	0	0	7	14	1	0	883815	210234	882817	211514	332	426	6.96	8.78	35.746	47.822	0.078078078	0.046838407	0.096096096	0.032786885	0.063063063	0.093676815	0.021021021	0.039812646	0.03003003	0.032786885	0.009009009	0.004683841	0.078078078	0.081967213	0.015015015	0.035128806	0.045045045	0.042154567	0.078078078	0.110070258	0.036036036	0.056206089	0.111111111	0.051522248	0.057057057	0.06323185	0.006006006	0.009367681	0.033033033	0.030444965	0.024024024	0.028103044	0.033033033
YGR192C_YNL291C	0	0	7	14	1	1	883815	85815	882817	84169	332	548	6.96	4.21	35.746	61.574	0.078078078	0.036429872	0.096096096	0.058287796	0.063063063	0.081967213	0.021021021	0.021857923	0.03003003	0.043715847	0.009009009	0.012750455	0.078078078	0.030965392	0.015015015	0.036429872	0.045045045	0.036429872	0.078078078	0.116575592	0.036036036	0.036429872	0.111111111	0.069216758	0.057057057	0.056466302	0.006006006	0.027322404	0.033033033	0.072859745	0.024024024	0.012750455	0.033033033
YGR192C_YNL294C	0	0	7	14	1	1	883815	80260	882817	78659	332	533	6.96	6.7	35.746	61.532	0.078078078	0.039325843	0.096096096	0.054307116	0.063063063	0.095505618	0.021021021	0.014981273	0.03003003	0.052434457	0.009009009	0.016853933	0.078078078	0.046816479	0.015015015	0.039325843	0.045045045	0.054307116	0.078078078	0.078651685	0.036036036	0.02247191	0.111111111	0.078651685	0.057057057	0.086142322	0.006006006	0.014981273	0.033033033	0.04494382	0.024024024	0.024344569	0.033033033
YGR192C_YNL331C	0	0	7	14	1	1	883815	17248	882817	16118	332	376	6.96	6.73	35.746	41.991	0.078078078	0.084880637	0.096096096	0.074270557	0.063063063	0.082228117	0.021021021	0.029177719	0.03003003	0.037135279	0.009009009	0.023872679	0.078078078	0.071618037	0.015015015	0.029177719	0.045045045	0.074270557	0.078078078	0.076923077	0.036036036	0.042440318	0.111111111	0.061007958	0.057057057	0.071618037	0.006006006	0.00530504	0.033033033	0.034482759	0.024024024	0.021220159	0.033033033
YGR192C_YNR065C	0	0	7	14	1	1	883815	753700	882817	750350	332	1116	6.96	4.78	35.746	125.199	0.078078078	0.081468218	0.096096096	0.049239033	0.063063063	0.069829902	0.021021021	0.010743062	0.03003003	0.066248881	0.009009009	0.008057296	0.078078078	0.069829902	0.015015015	0.025067144	0.045045045	0.076991943	0.078078078	0.085049239	0.036036036	0.034914951	0.111111111	0.046553268	0.057057057	0.061772605	0.006006006	0.025962399	0.033033033	0.039391226	0.024024024	0.018800358	0.033033033
YGR192C_YOL001W	0	0	7	15	1	0	883815	325250	882817	326131	332	293	6.96	9.66	35.746	33.226	0.078078078	0.034013605	0.096096096	0.040816327	0.063063063	0.095238095	0.021021021	0.010204082	0.03003003	0.034013605	0.009009009	0	0.078078078	0.074829932	0.015015015	0.030612245	0.045045045	0.037414966	0.078078078	0.119047619	0.036036036	0.040816327	0.111111111	0.06122449	0.057057057	0.074829932	0.006006006	0.017006803	0.033033033	0.051020408	0.024024024	0.030612245	0.033033033
YGR192C_YOL014W	0	0	7	15	1	0	883815	299694	882817	300068	332	124	6.96	6.72	35.746	13.917	0.078078078	0.064	0.096096096	0.096	0.063063063	0.08	0.021021021	0.048	0.03003003	0.056	0.009009009	0.024	0.078078078	0.032	0.015015015	0.016	0.045045045	0.032	0.078078078	0.088	0.036036036	0.04	0.111111111	0.04	0.057057057	0.04	0.006006006	0.04	0.033033033	0.072	0.024024024	0.024	0.033033033
YGR192C_YOL068C	0	0	7	15	1	1	883815	201879	882817	200368	332	503	6.96	8.58	35.746	57.702	0.078078078	0.03968254	0.096096096	0.041666667	0.063063063	0.111111111	0.021021021	0.027777778	0.03003003	0.053571429	0.009009009	0.005952381	0.078078078	0.095238095	0.015015015	0.035714286	0.045045045	0.049603175	0.078078078	0.05952381	0.036036036	0.049603175	0.111111111	0.055555556	0.057057057	0.075396825	0.006006006	0.021825397	0.033033033	0.031746032	0.024024024	0.027777778	0.033033033
YGR192C_YOL098C	0	0	7	15	1	1	883815	135838	882817	132725	332	1037	6.96	4.77	35.746	118.391	0.078078078	0.04238921	0.096096096	0.047206166	0.063063063	0.106936416	0.021021021	0.018304432	0.03003003	0.050096339	0.009009009	0.012524085	0.078078078	0.068400771	0.015015015	0.031791908	0.045045045	0.082851638	0.078078078	0.078998073	0.036036036	0.044315992	0.111111111	0.056840077	0.057057057	0.070327553	0.006006006	0.016377649	0.033033033	0.037572254	0.024024024	0.019267823	0.033033033
YGR192C_YOL103W	0	0	7	15	1	0	883815	124001	882817	125830	332	609	6.96	8.25	35.746	66.71	0.078078078	0.085245902	0.096096096	0.073770492	0.063063063	0.085245902	0.021021021	0.024590164	0.03003003	0.068852459	0.009009009	0.014754098	0.078078078	0.052459016	0.015015015	0.037704918	0.045045045	0.040983607	0.078078078	0.090163934	0.036036036	0.032786885	0.111111111	0.062295082	0.057057057	0.093442623	0.006006006	0.016393443	0.033033033	0.024590164	0.024024024	0.016393443	0.033033033
YGR192C_YOL158C	0	0	7	15	1	1	883815	21310	882817	19490	332	606	6.96	10.26	35.746	66.969	0.078078078	0.085667216	0.096096096	0.072487644	0.063063063	0.115321252	0.021021021	0.021416804	0.03003003	0.052718287	0.009009009	0.019769357	0.078078078	0.047775947	0.015015015	0.036243822	0.045045045	0.034596376	0.078078078	0.080724876	0.036036036	0.02800659	0.111111111	0.087314662	0.057057057	0.095551895	0.006006006	0.011532125	0.033033033	0.042833608	0.024024024	0.011532125	0.033033033
YGR192C_YOR047C	0	0	7	15	1	1	883815	417682	882817	416348	332	444	6.96	9.72	35.746	50.26	0.078078078	0.033707865	0.096096096	0.051685393	0.063063063	0.096629213	0.021021021	0.02247191	0.03003003	0.031460674	0.009009009	0.013483146	0.078078078	0.069662921	0.015015015	0.040449438	0.045045045	0.056179775	0.078078078	0.096629213	0.036036036	0.069662921	0.111111111	0.049438202	0.057057057	0.051685393	0.006006006	0.006741573	0.033033033	0.029213483	0.024024024	0.017977528	0.033033033
YGR192C_YOR060C	0	0	7	15	1	1	883815	441165	882817	440392	332	257	6.96	10.33	35.746	29.557	0.078078078	0.050387597	0.096096096	0.03875969	0.063063063	0.104651163	0.021021021	0.015503876	0.03003003	0.046511628	0.009009009	0.007751938	0.078078078	0.081395349	0.015015015	0.065891473	0.045045045	0.062015504	0.078078078	0.093023256	0.036036036	0.011627907	0.111111111	0.046511628	0.057057057	0.073643411	0.006006006	0.011627907	0.033033033	0.031007752	0.024024024	0.011627907	0.033033033
YGR192C_YOR120W	0	0	7	15	1	0	883815	551115	882817	552053	332	312	6.96	8.16	35.746	35.079	0.078078078	0.051118211	0.096096096	0.063897764	0.063063063	0.095846645	0.021021021	0.009584665	0.03003003	0.025559105	0.009009009	0.022364217	0.078078078	0.089456869	0.015015015	0.041533546	0.045045045	0.060702875	0.078078078	0.057507987	0.036036036	0.060702875	0.111111111	0.076677316	0.057057057	0.07028754	0.006006006	0.006389776	0.033033033	0.025559105	0.024024024	0.028753994	0.033033033
YGR192C_YOR222W	0	0	7	15	1	0	883815	758331	882817	759254	332	307	6.96	10.52	35.746	34.007	0.078078078	0.084415584	0.096096096	0.074675325	0.063063063	0.074675325	0.021021021	0.045454545	0.03003003	0.048701299	0.009009009	0.00974026	0.078078078	0.087662338	0.015015015	0.032467532	0.045045045	0.038961039	0.078078078	0.064935065	0.036036036	0.042207792	0.111111111	0.084415584	0.057057057	0.064935065	0.006006006	0.016233766	0.033033033	0.042207792	0.024024024	0.003246753	0.033033033
YGR192C_YOR303W	0	0	7	15	1	0	883815	882897	882817	884132	332	411	6.96	7.28	35.746	45.361	0.078078078	0.07038835	0.096096096	0.075242718	0.063063063	0.082524272	0.021021021	0.012135922	0.03003003	0.04368932	0.009009009	0.007281553	0.078078078	0.055825243	0.015015015	0.050970874	0.045045045	0.048543689	0.078078078	0.072815534	0.036036036	0.055825243	0.111111111	0.075242718	0.057057057	0.060679612	0.006006006	0.019417476	0.033033033	0.04368932	0.024024024	0.029126214	0.033033033
YGR192C_YPL015C	0	0	7	16	1	1	883815	526880	882817	525807	332	357	6.96	5.65	35.746	39.979	0.078078078	0.058659218	0.096096096	0.061452514	0.063063063	0.094972067	0.021021021	0.01396648	0.03003003	0.053072626	0.009009009	0.008379888	0.078078078	0.083798883	0.015015015	0.041899441	0.045045045	0.075418994	0.078078078	0.081005587	0.036036036	0.055865922	0.111111111	0.069832402	0.057057057	0.044692737	0.006006006	0.019553073	0.033033033	0.025139665	0.024024024	0.033519553	0.033033033
YGR192C_YPL047W	0	0	7	16	1	0	883815	465959	882817	466258	332	99	6.96	7.26	35.746	11.285	0.078078078	0.05	0.096096096	0.05	0.063063063	0.12	0.021021021	0.01	0.03003003	0.01	0.009009009	0	0.078078078	0.02	0.015015015	0.09	0.045045045	0.05	0.078078078	0.08	0.036036036	0.02	0.111111111	0.02	0.057057057	0.08	0.006006006	0.03	0.033033033	0.04	0.024024024	0.02	0.033033033
YGR192C_YPL066W	0	0	7	16	1	0	883815	426230	882817	427669	332	479	6.96	10.19	35.746	54.893	0.078078078	0.025	0.096096096	0.00625	0.063063063	0.0875	0.021021021	0.008333333	0.03003003	0.060416667	0.009009009	0.002083333	0.078078078	0.077083333	0.015015015	0.039583333	0.045045045	0.035416667	0.078078078	0.120833333	0.036036036	0.070833333	0.111111111	0.039583333	0.057057057	0.095833333	0.006006006	0.0125	0.033033033	0.0375	0.024024024	0.01875	0.033033033
YGR192C_YPL075W	0	0	7	16	1	0	883815	412251	882817	415359	332	785	6.96	8.5	35.746	87.728	0.078078078	0.041984733	0.096096096	0.03562341	0.063063063	0.092875318	0.021021021	0.012722646	0.03003003	0.041984733	0.009009009	0.008905852	0.078078078	0.069974555	0.015015015	0.047073791	0.045045045	0.055979644	0.078078078	0.128498728	0.036036036	0.071246819	0.111111111	0.044529262	0.057057057	0.066157761	0.006006006	0.008905852	0.033033033	0.025445293	0.024024024	0.011450382	0.033033033
YGR192C_YPL149W	0	0	7	16	1	0	883815	271309	882817	272193	332	294	6.96	8.75	35.746	33.56	0.078078078	0.054237288	0.096096096	0.027118644	0.063063063	0.094915254	0.021021021	0.027118644	0.03003003	0.061016949	0.009009009	0.027118644	0.078078078	0.06440678	0.015015015	0.030508475	0.045045045	0.044067797	0.078078078	0.094915254	0.036036036	0.057627119	0.111111111	0.061016949	0.057057057	0.101694915	0.006006006	0.010169492	0.033033033	0.023728814	0.024024024	0.016949153	0.033033033
YGR192C_YPL204W	0	0	7	16	1	0	883815	164275	882817	165759	332	494	6.96	10.07	35.746	57.34	0.078078078	0.056565657	0.096096096	0.042424242	0.063063063	0.094949495	0.021021021	0.026262626	0.03003003	0.044444444	0.009009009	0.008080808	0.078078078	0.066666667	0.015015015	0.086868687	0.045045045	0.054545455	0.078078078	0.070707071	0.036036036	0.058585859	0.111111111	0.034343434	0.057057057	0.052525253	0.006006006	0.01010101	0.033033033	0.046464646	0.024024024	0.028282828	0.033033033
YGR192C_YPL221W	0	0	7	16	1	0	883815	133042	882817	135423	332	793	6.96	8	35.746	89.29	0.078078078	0.046599496	0.096096096	0.088161209	0.063063063	0.090680101	0.021021021	0.031486146	0.03003003	0.062972292	0.009009009	0.017632242	0.078078078	0.052896725	0.015015015	0.032745592	0.045045045	0.041561713	0.078078078	0.093198992	0.036036036	0.027707809	0.111111111	0.06675063	0.057057057	0.070528967	0.006006006	0.018891688	0.033033033	0.050377834	0.024024024	0.012594458	0.033033033
YGR192C_YPL233W	0	0	7	16	1	0	883815	106172	882817	106822	332	216	6.96	4.52	35.746	25.416	0.078078078	0.023041475	0.096096096	0.050691244	0.063063063	0.096774194	0.021021021	0.041474654	0.03003003	0.01843318	0.009009009	0.00921659	0.078078078	0.078341014	0.015015015	0.101382488	0.045045045	0.096774194	0.078078078	0.050691244	0.036036036	0.01843318	0.111111111	0.078341014	0.057057057	0.036866359	0.006006006	0	0.033033033	0.041474654	0.024024024	0.02764977	0.033033033
YGR192C_YPL259C	0	0	7	16	1	1	883815	52671	882817	51244	332	475	6.96	9.05	35.746	53.873	0.078078078	0.037815126	0.096096096	0.046218487	0.063063063	0.090336134	0.021021021	0.018907563	0.03003003	0.035714286	0.009009009	0.008403361	0.078078078	0.094537815	0.015015015	0.031512605	0.045045045	0.056722689	0.078078078	0.088235294	0.036036036	0.054621849	0.111111111	0.056722689	0.057057057	0.090336134	0.006006006	0.010504202	0.033033033	0.039915966	0.024024024	0.018907563	0.033033033
YGR192C_YPR024W	0	0	7	16	1	0	883815	610478	882817	612721	332	747	6.96	7.06	35.746	81.771	0.078078078	0.06684492	0.096096096	0.094919786	0.063063063	0.088235294	0.021021021	0.022727273	0.03003003	0.032085561	0.009009009	0.00802139	0.078078078	0.076203209	0.015015015	0.032085561	0.045045045	0.064171123	0.078078078	0.078877005	0.036036036	0.046791444	0.111111111	0.06684492	0.057057057	0.049465241	0.006006006	0.010695187	0.033033033	0.026737968	0.024024024	0.014705882	0.033033033
YGR192C_YPR127W	0	0	7	16	1	0	883815	790079	882817	791116	332	345	6.96	5.89	35.746	38.6	0.078078078	0.072254335	0.096096096	0.060693642	0.063063063	0.089595376	0.021021021	0.014450867	0.03003003	0.052023121	0.009009009	0.011560694	0.078078078	0.069364162	0.015015015	0.028901734	0.045045045	0.075144509	0.078078078	0.083815029	0.036036036	0.034682081	0.111111111	0.066473988	0.057057057	0.069364162	0.006006006	0.014450867	0.033033033	0.031791908	0.024024024	0.026011561	0.033033033
YGR192C_YPR203W	0	0	7	16	1	0	883815	943876	882817	944184	332	102	6.96	9.38	35.746	11.766	0.078078078	0.038834951	0.096096096	0.038834951	0.063063063	0.106796117	0.021021021	0.038834951	0.03003003	0.048543689	0.009009009	0	0.078078078	0.087378641	0.015015015	0.029126214	0.045045045	0.038834951	0.078078078	0.077669903	0.036036036	0.058252427	0.111111111	0.058252427	0.057057057	0.058252427	0.006006006	0.038834951	0.033033033	0.038834951	0.024024024	0.029126214	0.033033033
YGR192C_YPR204W	0	0	7	16	1	0	883815	944599	882817	947697	332	1032	6.96	6.7	35.746	115.155	0.078078078	0.054211036	0.096096096	0.072604066	0.063063063	0.088092933	0.021021021	0.020329138	0.03003003	0.034849952	0.009009009	0.013552759	0.078078078	0.056147144	0.015015015	0.030009681	0.045045045	0.076476283	0.078078078	0.09196515	0.036036036	0.024201355	0.111111111	0.064859632	0.057057057	0.041626331	0.006006006	0.020329138	0.033033033	0.030977735	0.024024024	0.015488867	0.033033033
YCL011C_YAL013W	0	0	3	1	1	0	103358	129271	102075	130533	427	420	6.16	4.47	48.728	48.671	0.102803738	0.023752969	0.044392523	0.059382423	0.053738318	0.087885986	0.021028037	0.021377672	0.058411215	0.019002375	0.004672897	0.004750594	0.039719626	0.066508314	0.028037383	0.054631829	0.077102804	0.13064133	0.063084112	0.066508314	0.037383178	0.045130641	0.051401869	0.033254157	0.039719626	0.049881235	0.014018692	0.019002375	0.03271028	0.040380048	0.011682243	0.028503563	0.11682243
YCL011C_YAL025C	0	0	3	1	1	1	103358	101146	102075	100226	427	306	6.16	5.07	48.728	35.694	0.102803738	0.035830619	0.044392523	0.068403909	0.053738318	0.058631922	0.021028037	0.019543974	0.058411215	0.016286645	0.004672897	0.019543974	0.039719626	0.104234528	0.028037383	0.048859935	0.077102804	0.143322476	0.063084112	0.074918567	0.037383178	0.022801303	0.051401869	0.058631922	0.039719626	0.03257329	0.014018692	0.019543974	0.03271028	0.03257329	0.011682243	0.022801303	0.11682243
YCL011C_YAL035W	0	0	3	1	1	0	103358	76428	102075	79436	427	1002	6.16	5.55	48.728	112.268	0.102803738	0.053838485	0.044392523	0.083748754	0.053738318	0.091724826	0.021028037	0.016949153	0.058411215	0.019940179	0.004672897	0.005982054	0.039719626	0.121635095	0.028037383	0.049850449	0.077102804	0.122632104	0.063084112	0.062811565	0.037383178	0.035892323	0.051401869	0.064805583	0.039719626	0.047856431	0.014018692	0.006979063	0.03271028	0.017946162	0.011682243	0.011964108	0.11682243
YCL011C_YAR068W	0	0	3	1	1	0	103358	222397	102075	222882	427	161	6.16	12.31	48.728	18.011	0.102803738	0	0.044392523	0.043209877	0.053738318	0.25308642	0.021028037	0.018518519	0.058411215	0.037037037	0.004672897	0.018518519	0.039719626	0.037037037	0.028037383	0.086419753	0.077102804	0	0.063084112	0.061728395	0.037383178	0.154320988	0.051401869	0.074074074	0.039719626	0.00617284	0.014018692	0	0.03271028	0	0.011682243	0.049382716	0.11682243
YCL011C_YBL006C	0	0	3	2	1	1	103358	217132	102075	216590	427	180	6.16	9.32	48.728	19.792	0.102803738	0.071823204	0.044392523	0.08839779	0.053738318	0.093922652	0.021028037	0.011049724	0.058411215	0.033149171	0.004672897	0	0.039719626	0.066298343	0.028037383	0.066298343	0.077102804	0.066298343	0.063084112	0.127071823	0.037383178	0.022099448	0.051401869	0.077348066	0.039719626	0.027624309	0.014018692	0.022099448	0.03271028	0.027624309	0.011682243	0.055248619	0.11682243
YCL011C_YBL046W	0	0	3	2	1	0	103358	132427	102075	133752	427	441	6.16	4.09	48.728	50.655	0.102803738	0.047511312	0.044392523	0.024886878	0.053738318	0.070135747	0.021028037	0.036199095	0.058411215	0.040723982	0.004672897	0.00678733	0.039719626	0.07239819	0.028037383	0.027149321	0.077102804	0.106334842	0.063084112	0.081447964	0.037383178	0.033936652	0.051401869	0.038461538	0.039719626	0.049773756	0.014018692	0.013574661	0.03271028	0.024886878	0.011682243	0.015837104	0.11682243
YCL011C_YBR155W	0	0	3	2	1	0	103358	549765	102075	550922	427	385	6.16	5.62	48.728	44.112	0.102803738	0.046632124	0.044392523	0.067357513	0.053738318	0.095854922	0.021028037	0.025906736	0.058411215	0.041450777	0.004672897	0.005181347	0.039719626	0.119170984	0.028037383	0.03626943	0.077102804	0.124352332	0.063084112	0.051813472	0.037383178	0.049222798	0.051401869	0.046632124	0.039719626	0.049222798	0.014018692	0.012953368	0.03271028	0.031088083	0.011682243	0.007772021	0.11682243
YCL011C_YBR187W	0	0	3	2	1	0	103358	602629	102075	603471	427	280	6.16	5.21	48.728	30.34	0.102803738	0.071174377	0.044392523	0.128113879	0.053738318	0.103202847	0.021028037	0.060498221	0.058411215	0.060498221	0.004672897	0.007117438	0.039719626	0.049822064	0.028037383	0.021352313	0.077102804	0.056939502	0.063084112	0.09252669	0.037383178	0.007117438	0.051401869	0.06405694	0.039719626	0.088967972	0.014018692	0.003558719	0.03271028	0.024911032	0.011682243	0.017793594	0.11682243
YCL011C_YBR189W	0	0	3	2	1	0	103358	604503	102075	605503	427	195	6.16	10.9	48.728	22.298	0.102803738	0.051020408	0.044392523	0.102040816	0.053738318	0.102040816	0.021028037	0.010204082	0.058411215	0.035714286	0.004672897	0	0.039719626	0.086734694	0.028037383	0.025510204	0.077102804	0.086734694	0.063084112	0.06122449	0.037383178	0.045918367	0.051401869	0.06122449	0.039719626	0.045918367	0.014018692	0	0.03271028	0.030612245	0.011682243	0.020408163	0.11682243
YCL011C_YBR231C	0	0	3	2	1	1	103358	683085	102075	682174	427	303	6.16	4.85	48.728	34.343	0.102803738	0.065789474	0.044392523	0.069078947	0.053738318	0.088815789	0.021028037	0.003289474	0.058411215	0.016447368	0.004672897	0.009868421	0.039719626	0.085526316	0.028037383	0.065789474	0.077102804	0.125	0.063084112	0.092105263	0.037383178	0.032894737	0.051401869	0.046052632	0.039719626	0.036184211	0.014018692	0	0.03271028	0.029605263	0.011682243	0.013157895	0.11682243
YCL011C_YBR255C-A	NA	NA	NA	NA	NA	NA	NA	NA	NA	NA	NA	NA	NA	NA	NA	NA	NA	NA	NA	NA	NA	NA	NA	NA	NA	NA	NA	NA	NA	NA	NA	NA	NA	NA	NA	NA	NA	NA	NA	NA	NA	NA	NA	NA	NA	NA	NA	NA	NA
YCL011C_YBR268W	0	0	3	2	1	0	103358	741294	102075	741611	427	105	6.16	10.67	48.728	11.949	0.102803738	0.037735849	0.044392523	0.075471698	0.053738318	0.122641509	0.021028037	0.009433962	0.058411215	0.009433962	0.004672897	0.028301887	0.039719626	0.08490566	0.028037383	0.037735849	0.077102804	0.047169811	0.063084112	0.103773585	0.037383178	0.037735849	0.051401869	0.066037736	0.039719626	0.047169811	0.014018692	0.009433962	0.03271028	0.028301887	0.011682243	0.018867925	0.11682243
YCL011C_YBR278W	0	0	3	2	1	0	103358	760290	102075	760895	427	201	6.16	4.35	48.728	22.665	0.102803738	0.01980198	0.044392523	0.059405941	0.053738318	0.094059406	0.021028037	0.00990099	0.058411215	0.02970297	0.004672897	0	0.039719626	0.089108911	0.028037383	0.03960396	0.077102804	0.148514851	0.063084112	0.108910891	0.037383178	0.034653465	0.051401869	0.084158416	0.039719626	0.03960396	0.014018692	0.00990099	0.03271028	0.00990099	0.011682243	0.01980198	0.11682243
YCL011C_YBR290W	0	0	3	2	1	0	103358	782587	102075	783552	427	321	6.16	4.52	48.728	35.763	0.102803738	0.086956522	0.044392523	0.049689441	0.053738318	0.083850932	0.021028037	0.02173913	0.058411215	0.043478261	0.004672897	0.00621118	0.039719626	0.046583851	0.028037383	0.059006211	0.077102804	0.077639752	0.063084112	0.080745342	0.037383178	0.031055901	0.051401869	0.037267081	0.039719626	0.074534161	0.014018692	0.00310559	0.03271028	0.034161491	0.011682243	0.02484472	0.11682243
YCL011C_YCL054W	0	0	3	3	1	0	103358	31449	102075	33974	427	841	6.16	8.2	48.728	96.484	0.102803738	0.051068884	0.044392523	0.062945368	0.053738318	0.072446556	0.021028037	0.029691211	0.058411215	0.03087886	0.004672897	0.009501188	0.039719626	0.133016627	0.028037383	0.034441805	0.077102804	0.097387173	0.063084112	0.054631829	0.037383178	0.029691211	0.051401869	0.052256532	0.039719626	0.06175772	0.014018692	0.007125891	0.03271028	0.020190024	0.011682243	0.01543943	0.11682243
YCL011C_YDL002C	0	0	3	4	1	1	103358	447576	102075	446965	427	203	6.16	8.06	48.728	23.857	0.102803738	0.039215686	0.044392523	0.029411765	0.053738318	0.112745098	0.021028037	0.024509804	0.058411215	0.009803922	0.004672897	0.004901961	0.039719626	0.117647059	0.028037383	0.034313725	0.077102804	0.12745098	0.063084112	0.073529412	0.037383178	0.039215686	0.051401869	0.044117647	0.039719626	0.034313725	0.014018692	0.009803922	0.03271028	0.039215686	0.011682243	0.004901961	0.11682243
YCL011C_YDL003W	0	0	3	4	1	0	103358	444681	102075	446381	427	566	6.16	4.35	48.728	63.29	0.102803738	0.051146384	0.044392523	0.054673721	0.053738318	0.082892416	0.021028037	0.02292769	0.058411215	0.037037037	0.004672897	0.008818342	0.039719626	0.054673721	0.028037383	0.038800705	0.077102804	0.102292769	0.063084112	0.082892416	0.037383178	0.042328042	0.051401869	0.040564374	0.039719626	0.070546737	0.014018692	0.003527337	0.03271028	0.010582011	0.011682243	0.008818342	0.11682243
YCL011C_YDL007W	0	0	3	4	1	0	103358	438045	102075	439358	427	437	6.16	5.9	48.728	48.828	0.102803738	0.073059361	0.044392523	0.0456621	0.053738318	0.107305936	0.021028037	0.03196347	0.058411215	0.02283105	0.004672897	0	0.039719626	0.100456621	0.028037383	0.038812785	0.077102804	0.095890411	0.063084112	0.063926941	0.037383178	0.052511416	0.051401869	0.054794521	0.039719626	0.070776256	0.014018692	0.00913242	0.03271028	0.02283105	0.011682243	0.01369863	0.11682243
YCL011C_YDL010W	0	0	3	4	1	0	103358	432328	102075	433023	427	231	6.16	6.32	48.728	25.783	0.102803738	0.064655172	0.044392523	0.043103448	0.053738318	0.099137931	0.021028037	0.021551724	0.058411215	0.034482759	0.004672897	0.004310345	0.039719626	0.086206897	0.028037383	0.043103448	0.077102804	0.090517241	0.063084112	0.103448276	0.037383178	0.030172414	0.051401869	0.056034483	0.039719626	0.077586207	0.014018692	0.004310345	0.03271028	0.030172414	0.011682243	0.012931034	0.11682243
YCL011C_YDL014W	0	0	3	4	1	0	103358	427362	102075	428345	427	327	6.16	11.03	48.728	34.465	0.102803738	0.18902439	0.044392523	0.076219512	0.053738318	0.048780488	0.021028037	0.024390244	0.058411215	0.030487805	0.004672897	0.00304878	0.039719626	0.054878049	0.028037383	0.018292683	0.077102804	0.06097561	0.063084112	0.073170732	0.037383178	0.048780488	0.051401869	0.082317073	0.039719626	0.054878049	0.014018692	0.009146341	0.03271028	0.024390244	0.011682243	0.021341463	0.11682243
YCL011C_YDL036C	0	0	3	4	1	1	103358	388899	102075	387511	427	462	6.16	9.71	48.728	53.398	0.102803738	0.058315335	0.044392523	0.043196544	0.053738318	0.075593952	0.021028037	0.012958963	0.058411215	0.034557235	0.004672897	0.012958963	0.039719626	0.095032397	0.028037383	0.032397408	0.077102804	0.079913607	0.063084112	0.047516199	0.037383178	0.049676026	0.051401869	0.060475162	0.039719626	0.066954644	0.014018692	0.01511879	0.03271028	0.034557235	0.011682243	0.030237581	0.11682243
YCL011C_YDL065C	0	0	3	4	1	1	103358	337277	102075	336249	427	342	6.16	4.08	48.728	38.706	0.102803738	0.058309038	0.044392523	0.037900875	0.053738318	0.090379009	0.021028037	0.034985423	0.058411215	0.023323615	0.004672897	0.002915452	0.039719626	0.090379009	0.028037383	0.049562682	0.077102804	0.137026239	0.063084112	0.067055394	0.037383178	0.026239067	0.051401869	0.04664723	0.039719626	0.034985423	0.014018692	0.005830904	0.03271028	0.017492711	0.011682243	0.011661808	0.11682243
YCL011C_YDL122W	0	0	3	4	1	0	103358	242552	102075	244981	427	809	6.16	4.63	48.728	92.768	0.102803738	0.050617284	0.044392523	0.039506173	0.053738318	0.087654321	0.021028037	0.014814815	0.058411215	0.039506173	0.004672897	0.007407407	0.039719626	0.07654321	0.028037383	0.039506173	0.077102804	0.114814815	0.063084112	0.080246914	0.037383178	0.038271605	0.051401869	0.049382716	0.039719626	0.060493827	0.014018692	0.011111111	0.03271028	0.035802469	0.011682243	0.02345679	0.11682243
YCL011C_YDL153C	0	0	3	4	1	1	103358	183019	102075	181187	427	610	6.16	4.42	48.728	70.259	0.102803738	0.057283142	0.044392523	0.060556465	0.053738318	0.070376432	0.021028037	0.018003273	0.058411215	0.031096563	0.004672897	0.004909984	0.039719626	0.106382979	0.028037383	0.039279869	0.077102804	0.152209493	0.063084112	0.06710311	0.037383178	0.018003273	0.051401869	0.032733224	0.039719626	0.039279869	0.014018692	0.001636661	0.03271028	0.031096563	0.011682243	0.01309329	0.11682243
YCL011C_YDL161W	0	0	3	4	1	0	103358	167715	102075	169079	427	454	6.16	5.66	48.728	52.352	0.102803738	0.057142857	0.044392523	0.048351648	0.053738318	0.083516484	0.021028037	0.021978022	0.058411215	0.030769231	0.004672897	0.004395604	0.039719626	0.052747253	0.028037383	0.151648352	0.077102804	0.068131868	0.063084112	0.074725275	0.037383178	0.032967033	0.051401869	0.032967033	0.039719626	0.041758242	0.014018692	0.004395604	0.03271028	0.037362637	0.011682243	0.010989011	0.11682243
YCL011C_YDL173W	0	0	3	4	1	0	103358	148192	102075	149079	427	295	6.16	10.3	48.728	31.886	0.102803738	0.091216216	0.044392523	0.064189189	0.053738318	0.040540541	0.021028037	0.016891892	0.058411215	0.037162162	0.004672897	0	0.039719626	0.101351351	0.028037383	0.023648649	0.077102804	0.047297297	0.063084112	0.097972973	0.037383178	0.043918919	0.051401869	0.043918919	0.039719626	0.064189189	0.014018692	0	0.03271028	0.010135135	0.011682243	0.02027027	0.11682243
YCL011C_YDL209C	0	0	3	4	1	1	103358	87227	102075	86208	427	339	6.16	7.97	48.728	38.43	0.102803738	0.073529412	0.044392523	0.052941176	0.053738318	0.1	0.021028037	0.020588235	0.058411215	0.052941176	0.004672897	0.014705882	0.039719626	0.094117647	0.028037383	0.032352941	0.077102804	0.073529412	0.063084112	0.073529412	0.037383178	0.041176471	0.051401869	0.044117647	0.039719626	0.041176471	0.014018692	0.017647059	0.03271028	0.020588235	0.011682243	0.014705882	0.11682243
YCL011C_YDL213C	0	0	3	4	1	1	103358	77967	102075	77290	427	225	6.16	10.86	48.728	25.216	0.102803738	0.092920354	0.044392523	0.066371681	0.053738318	0.075221239	0.021028037	0.013274336	0.058411215	0.026548673	0.004672897	0	0.039719626	0.168141593	0.028037383	0.053097345	0.077102804	0.079646018	0.063084112	0.03539823	0.037383178	0.03539823	0.051401869	0.03539823	0.039719626	0.048672566	0.014018692	0	0.03271028	0	0.011682243	0.013274336	0.11682243
YCL011C_YDL236W	0	0	3	4	1	0	103358	32296	102075	33234	427	312	6.16	6.3	48.728	34.624	0.102803738	0.089456869	0.044392523	0.051118211	0.053738318	0.115015974	0.021028037	0.019169329	0.058411215	0.057507987	0.004672897	0.006389776	0.039719626	0.076677316	0.028037383	0.038338658	0.077102804	0.047923323	0.063084112	0.073482428	0.037383178	0.03514377	0.051401869	0.057507987	0.039719626	0.054313099	0.014018692	0.015974441	0.03271028	0.041533546	0.011682243	0.009584665	0.11682243
YCL011C_YDR035W	0	0	3	4	1	0	103358	521814	102075	522926	427	370	6.16	7.35	48.728	41.07	0.102803738	0.088948787	0.044392523	0.061994609	0.053738318	0.094339623	0.021028037	0.021563342	0.058411215	0.032345013	0.004672897	0.008086253	0.039719626	0.088948787	0.028037383	0.032345013	0.077102804	0.067385445	0.063084112	0.059299191	0.037383178	0.037735849	0.051401869	0.040431267	0.039719626	0.078167116	0.014018692	0.021563342	0.03271028	0.018867925	0.011682243	0.018867925	0.11682243
YCL011C_YDR056C	0	0	3	4	1	1	103358	565639	102075	565022	427	205	6.16	4.56	48.728	22.769	0.102803738	0.053398058	0.044392523	0.077669903	0.053738318	0.097087379	0.021028037	0.024271845	0.058411215	0.029126214	0.004672897	0.009708738	0.039719626	0.097087379	0.028037383	0.048543689	0.077102804	0.067961165	0.063084112	0.063106796	0.037383178	0.029126214	0.051401869	0.082524272	0.039719626	0.04368932	0.014018692	0.014563107	0.03271028	0.038834951	0.011682243	0	0.11682243
YCL011C_YDR068W	0	0	3	4	1	0	103358	583712	102075	584644	427	310	6.16	4.3	48.728	35.964	0.102803738	0.028938907	0.044392523	0.041800643	0.053738318	0.061093248	0.021028037	0.012861736	0.058411215	0.032154341	0.004672897	0.01607717	0.039719626	0.128617363	0.028037383	0.028938907	0.077102804	0.147909968	0.063084112	0.083601286	0.037383178	0.009646302	0.051401869	0.048231511	0.039719626	0.051446945	0.014018692	0.006430868	0.03271028	0.022508039	0.011682243	0.01607717	0.11682243
YCL011C_YDR163W	0	0	3	4	1	0	103358	781421	102075	781948	427	175	6.16	9.79	48.728	19.935	0.102803738	0.0625	0.044392523	0.073863636	0.053738318	0.073863636	0.021028037	0.017045455	0.058411215	0.017045455	0.004672897	0.005681818	0.039719626	0.113636364	0.028037383	0.051136364	0.077102804	0.119318182	0.063084112	0.073863636	0.037383178	0.017045455	0.051401869	0.039772727	0.039719626	0.017045455	0.014018692	0.005681818	0.03271028	0.022727273	0.011682243	0.045454545	0.11682243
YCL011C_YDR190C	0	0	3	4	1	1	103358	841993	102075	840602	427	463	6.16	5.7	48.728	50.453	0.102803738	0.077586207	0.044392523	0.077586207	0.053738318	0.103448276	0.021028037	0.017241379	0.058411215	0.015086207	0.004672897	0	0.039719626	0.073275862	0.028037383	0.025862069	0.077102804	0.092672414	0.063084112	0.05387931	0.037383178	0.040948276	0.051401869	0.096982759	0.039719626	0.073275862	0.014018692	0.006465517	0.03271028	0.025862069	0.011682243	0.012931034	0.11682243
YCL011C_YDR299W	0	0	3	4	1	0	103358	1059624	102075	1061228	427	534	6.16	4.51	48.728	61.203	0.102803738	0.031775701	0.044392523	0.065420561	0.053738318	0.087850467	0.021028037	0.007476636	0.058411215	0.029906542	0.004672897	0.005607477	0.039719626	0.097196262	0.028037383	0.044859813	0.077102804	0.127102804	0.063084112	0.080373832	0.037383178	0.022429907	0.051401869	0.037383178	0.039719626	0.059813084	0.014018692	0.001869159	0.03271028	0.026168224	0.011682243	0.013084112	0.11682243
YCL011C_YDR365C	0	0	3	4	1	1	103358	1206376	102075	1204490	427	628	6.16	4.99	48.728	72.409	0.102803738	0.041335453	0.044392523	0.047694754	0.053738318	0.047694754	0.021028037	0.019077901	0.058411215	0.038155803	0.004672897	0.00317965	0.039719626	0.143084261	0.028037383	0.027027027	0.077102804	0.120826709	0.063084112	0.079491256	0.037383178	0.028616852	0.051401869	0.054054054	0.039719626	0.038155803	0.014018692	0.004769475	0.03271028	0.027027027	0.011682243	0.014308426	0.11682243
YCL011C_YDR410C	0	0	3	4	1	1	103358	1293084	102075	1292365	427	239	6.16	8.03	48.728	27.887	0.102803738	0.05	0.044392523	0.041666667	0.053738318	0.133333333	0.021028037	0.016666667	0.058411215	0.095833333	0.004672897	0.016666667	0.039719626	0.058333333	0.028037383	0.020833333	0.077102804	0.058333333	0.063084112	0.075	0.037383178	0.033333333	0.051401869	0.0625	0.039719626	0.0875	0.014018692	0.0125	0.03271028	0.054166667	0.011682243	0.045833333	0.11682243
YCL011C_YDR412W	0	0	3	4	1	0	103358	1294686	102075	1295393	427	235	6.16	10.18	48.728	27.974	0.102803738	0.029661017	0.044392523	0.046610169	0.053738318	0.076271186	0.021028037	0.008474576	0.058411215	0.038135593	0.004672897	0.004237288	0.039719626	0.152542373	0.028037383	0.059322034	0.077102804	0.11440678	0.063084112	0.042372881	0.037383178	0.012711864	0.051401869	0.042372881	0.039719626	0.042372881	0.014018692	0	0.03271028	0.025423729	0.011682243	0.012711864	0.11682243
YCL011C_YEL037C	0	0	3	5	1	1	103358	82603	102075	81407	427	398	6.16	4.07	48.728	42.366	0.102803738	0.07518797	0.044392523	0.120300752	0.053738318	0.072681704	0.021028037	0.025062657	0.058411215	0.027568922	0.004672897	0	0.039719626	0.037593985	0.028037383	0.062656642	0.077102804	0.115288221	0.063084112	0.072681704	0.037383178	0.060150376	0.051401869	0.060150376	0.039719626	0.037593985	0.014018692	0.010025063	0.03271028	0.015037594	0.011682243	0.005012531	0.11682243
YCL011C_YER002W	0	0	3	5	1	0	103358	156802	102075	157497	427	231	6.16	10.07	48.728	26.901	0.102803738	0.051724138	0.044392523	0.060344828	0.053738318	0.068965517	0.021028037	0.017241379	0.058411215	0.012931034	0.004672897	0.012931034	0.039719626	0.137931034	0.028037383	0.038793103	0.077102804	0.107758621	0.063084112	0.047413793	0.037383178	0.025862069	0.051401869	0.060344828	0.039719626	0.047413793	0.014018692	0	0.03271028	0.030172414	0.011682243	0.004310345	0.11682243
YCL011C_YER006W	0	0	3	5	1	0	103358	162722	102075	164284	427	520	6.16	9.64	48.728	57.708	0.102803738	0.051823417	0.044392523	0.092130518	0.053738318	0.094049904	0.021028037	0.017274472	0.058411215	0.021113244	0.004672897	0.009596929	0.039719626	0.105566219	0.028037383	0.030710173	0.077102804	0.076775432	0.063084112	0.088291747	0.037383178	0.042226488	0.051401869	0.057581574	0.039719626	0.05950096	0.014018692	0.003838772	0.03271028	0.021113244	0.011682243	0.011516315	0.11682243
YCL011C_YER126C	0	0	3	5	1	1	103358	414175	102075	413390	427	261	6.16	11.04	48.728	29.722	0.102803738	0.064885496	0.044392523	0.057251908	0.053738318	0.064885496	0.021028037	0.026717557	0.058411215	0.022900763	0.004672897	0.011450382	0.039719626	0.141221374	0.028037383	0.041984733	0.077102804	0.072519084	0.063084112	0.064885496	0.037383178	0.045801527	0.051401869	0.080152672	0.039719626	0.053435115	0.014018692	0.003816794	0.03271028	0.019083969	0.011682243	0.026717557	0.11682243
YCL011C_YER127W	0	0	3	5	1	0	103358	414477	102075	415550	427	357	6.16	6.91	48.728	40.794	0.102803738	0.05027933	0.044392523	0.067039106	0.053738318	0.078212291	0.021028037	0.022346369	0.058411215	0.019553073	0.004672897	0.005586592	0.039719626	0.089385475	0.028037383	0.030726257	0.077102804	0.106145251	0.063084112	0.097765363	0.037383178	0.027932961	0.051401869	0.033519553	0.039719626	0.047486034	0.014018692	0.002793296	0.03271028	0.027932961	0.011682243	0.019553073	0.11682243
YCL011C_YFL017C	0	0	3	6	1	1	103358	104456	102075	103977	427	159	6.16	4.97	48.728	18.135	0.102803738	0.08125	0.044392523	0.03125	0.053738318	0.075	0.021028037	0.03125	0.058411215	0.03125	0.004672897	0.0125	0.039719626	0.0875	0.028037383	0.0375	0.077102804	0.0875	0.063084112	0.03125	0.037383178	0.01875	0.051401869	0.06875	0.039719626	0.10625	0.014018692	0.025	0.03271028	0.04375	0.011682243	0.0125	0.11682243
YCL011C_YFL065C	0	0	3	6	1	1	103358	3338	102075	3030	427	102	6.16	9.82	48.728	11.785	0.102803738	0.038834951	0.044392523	0.038834951	0.053738318	0.106796117	0.021028037	0.038834951	0.058411215	0.048543689	0.004672897	0	0.039719626	0.087378641	0.028037383	0.029126214	0.077102804	0.038834951	0.063084112	0.077669903	0.037383178	0.058252427	0.051401869	0.058252427	0.039719626	0.058252427	0.014018692	0.038834951	0.03271028	0.038834951	0.011682243	0.019417476	0.11682243
YCL011C_YFR001W	0	0	3	6	1	0	103358	149105	102075	149719	427	204	6.16	11.1	48.728	23.59	0.102803738	0.034146341	0.044392523	0.07804878	0.053738318	0.07804878	0.021028037	0.009756098	0.058411215	0.014634146	0.004672897	0	0.039719626	0.2	0.028037383	0.03902439	0.077102804	0.092682927	0.063084112	0.063414634	0.037383178	0.034146341	0.051401869	0.043902439	0.039719626	0.053658537	0.014018692	0	0.03271028	0.014634146	0.011682243	0.004878049	0.11682243
YCL011C_YFR004W	0	0	3	6	1	0	103358	153388	102075	154308	427	306	6.16	6.13	48.728	34.398	0.102803738	0.061889251	0.044392523	0.061889251	0.053738318	0.087947883	0.021028037	0.052117264	0.058411215	0.019543974	0.004672897	0.009771987	0.039719626	0.078175896	0.028037383	0.045602606	0.077102804	0.078175896	0.063084112	0.068403909	0.037383178	0.019543974	0.051401869	0.09771987	0.039719626	0.042345277	0.014018692	0.003257329	0.03271028	0.03257329	0.011682243	0.026058632	0.11682243
YCL011C_YFR024C-A	0	0	3	6	1	1	103358	203421	102075	201948	427	459	6.16	8.34	48.728	49.344	0.102803738	0.102173913	0.044392523	0.1	0.053738318	0.047826087	0.021028037	0.008695652	0.058411215	0.045652174	0.004672897	0.008695652	0.039719626	0.045652174	0.028037383	0.017391304	0.077102804	0.034782609	0.063084112	0.12826087	0.037383178	0.047826087	0.051401869	0.05	0.039719626	0.045652174	0.014018692	0.002173913	0.03271028	0.039130435	0.011682243	0.002173913	0.11682243
YCL011C_YFR033C	0	0	3	6	1	1	103358	224757	102075	224314	427	147	6.16	3.81	48.728	17.257	0.102803738	0.040540541	0.044392523	0.067567568	0.053738318	0.074324324	0.021028037	0.013513514	0.058411215	0.027027027	0.004672897	0.006756757	0.039719626	0.060810811	0.028037383	0.054054054	0.077102804	0.243243243	0.063084112	0	0.037383178	0.02027027	0.051401869	0.060810811	0.039719626	0.013513514	0.014018692	0.013513514	0.03271028	0.027027027	0.011682243	0.047297297	0.11682243
YCL011C_YFR034C	0	1	3	6	1	1	103358	225946	102075	225008	427	312	6.16	7.91	48.728	34.089	0.102803738	0.038338658	0.044392523	0.083067093	0.053738318	0.07028754	0.021028037	0.015974441	0.058411215	0.015974441	0.004672897	0.006389776	0.039719626	0.063897764	0.028037383	0.031948882	0.077102804	0.063897764	0.063084112	0.127795527	0.037383178	0.073482428	0.051401869	0.067092652	0.039719626	0.03514377	0.014018692	0.003194888	0.03271028	0.012779553	0.011682243	0.041533546	0.11682243
YCL011C_YFR037C	0	0	3	6	1	1	103358	229173	102075	227500	427	557	6.16	5.14	48.728	63.168	0.102803738	0.05734767	0.044392523	0.044802867	0.053738318	0.086021505	0.021028037	0.016129032	0.058411215	0.035842294	0.004672897	0.008960573	0.039719626	0.091397849	0.028037383	0.050179211	0.077102804	0.102150538	0.063084112	0.078853047	0.037383178	0.037634409	0.051401869	0.064516129	0.039719626	0.059139785	0.014018692	0.012544803	0.03271028	0.025089606	0.011682243	0.025089606	0.11682243
YCL011C_YGL023C	0	0	3	7	1	1	103358	452109	102075	450202	427	635	6.16	7.76	48.728	70.616	0.102803738	0.048742138	0.044392523	0.045597484	0.053738318	0.066037736	0.021028037	0.012578616	0.058411215	0.023584906	0.004672897	0.007861635	0.039719626	0.073899371	0.028037383	0.045597484	0.077102804	0.062893082	0.063084112	0.136792453	0.037383178	0.044025157	0.051401869	0.047169811	0.039719626	0.050314465	0.014018692	0.012578616	0.03271028	0.017295597	0.011682243	0.028301887	0.11682243
YCL011C_YGL029W	0	0	3	7	1	0	103358	440068	102075	440430	427	120	6.16	11.21	48.728	14.417	0.102803738	0.024793388	0.044392523	0.090909091	0.053738318	0.074380165	0.021028037	0.033057851	0.058411215	0.008264463	0.004672897	0.016528926	0.039719626	0.223140496	0.028037383	0.033057851	0.077102804	0.148760331	0.063084112	0.033057851	0.037383178	0.016528926	0.051401869	0.049586777	0.039719626	0.008264463	0.014018692	0	0.03271028	0.008264463	0.011682243	0.008264463	0.11682243
YCL011C_YGL062W	0	0	3	7	1	0	103358	385199	102075	388735	427	1178	6.16	6.17	48.728	130.098	0.102803738	0.076335878	0.044392523	0.086513995	0.053738318	0.088210348	0.021028037	0.022052587	0.058411215	0.039864292	0.004672897	0.006785411	0.039719626	0.055131467	0.028037383	0.042408821	0.077102804	0.063613232	0.063084112	0.050890585	0.037383178	0.046649703	0.051401869	0.084817642	0.039719626	0.061068702	0.014018692	0.010178117	0.03271028	0.026293469	0.011682243	0.024597116	0.11682243
YCL011C_YGL153W	0	0	3	7	1	0	103358	216278	102075	217303	427	341	6.16	4.61	48.728	38.42	0.102803738	0.040935673	0.044392523	0.076023392	0.053738318	0.067251462	0.021028037	0.035087719	0.058411215	0.026315789	0.004672897	0.011695906	0.039719626	0.105263158	0.028037383	0.040935673	0.077102804	0.108187135	0.063084112	0.081871345	0.037383178	0.040935673	0.051401869	0.049707602	0.039719626	0.073099415	0.014018692	0	0.03271028	0.01754386	0.011682243	0.002923977	0.11682243
YCL011C_YGL164C	0	0	3	7	1	1	103358	193306	102075	191984	427	440	6.16	4.53	48.728	50.296	0.102803738	0.0430839	0.044392523	0.052154195	0.053738318	0.10430839	0.021028037	0.013605442	0.058411215	0.029478458	0.004672897	0.004535147	0.039719626	0.097505669	0.028037383	0.031746032	0.077102804	0.124716553	0.063084112	0.083900227	0.037383178	0.015873016	0.051401869	0.038548753	0.039719626	0.079365079	0.014018692	0	0.03271028	0.029478458	0.011682243	0.004535147	0.11682243
YCL011C_YGL186C	0	0	3	7	1	1	103358	152782	102075	151043	427	579	6.16	8.81	48.728	64.546	0.102803738	0.081034483	0.044392523	0.068965517	0.053738318	0.094827586	0.021028037	0.027586207	0.058411215	0.067241379	0.004672897	0.031034483	0.039719626	0.048275862	0.028037383	0.015517241	0.077102804	0.039655172	0.063084112	0.094827586	0.037383178	0.029310345	0.051401869	0.089655172	0.039719626	0.074137931	0.014018692	0.022413793	0.03271028	0.043103448	0.011682243	0.017241379	0.11682243
YCL011C_YGL201C	0	0	3	7	1	1	103358	120911	102075	117858	427	1017	6.16	4.88	48.728	112.977	0.102803738	0.059921415	0.044392523	0.068762279	0.053738318	0.072691552	0.021028037	0.023575639	0.058411215	0.035363458	0.004672897	0.003929273	0.039719626	0.048133595	0.028037383	0.038310413	0.077102804	0.07956778	0.063084112	0.100196464	0.037383178	0.041257367	0.051401869	0.064833006	0.039719626	0.061886051	0.014018692	0.011787819	0.03271028	0.026522593	0.011682243	0.016699411	0.11682243
YCL011C_YGL203C	0	0	3	7	1	1	103358	114668	102075	112479	427	729	6.16	4.22	48.728	82.244	0.102803738	0.063013699	0.044392523	0.038356164	0.053738318	0.080821918	0.021028037	0.017808219	0.058411215	0.043835616	0.004672897	0.015068493	0.039719626	0.073972603	0.028037383	0.024657534	0.077102804	0.084931507	0.063084112	0.095890411	0.037383178	0.036986301	0.051401869	0.045205479	0.039719626	0.057534247	0.014018692	0.009589041	0.03271028	0.031506849	0.011682243	0.023287671	0.11682243
YCL011C_YGL211W	0	0	3	7	1	0	103358	92516	102075	93595	427	359	6.16	8.97	48.728	39.987	0.102803738	0.061111111	0.044392523	0.083333333	0.053738318	0.097222222	0.021028037	0.022222222	0.058411215	0.033333333	0.004672897	0.002777778	0.039719626	0.080555556	0.028037383	0.030555556	0.077102804	0.055555556	0.063084112	0.080555556	0.037383178	0.025	0.051401869	0.063888889	0.039719626	0.063888889	0.014018692	0.036111111	0.03271028	0.038888889	0.011682243	0.016666667	0.11682243
YCL011C_YGL212W	0	0	3	7	1	0	103358	91436	102075	92386	427	316	6.16	9	48.728	36.711	0.102803738	0.047318612	0.044392523	0.056782334	0.053738318	0.110410095	0.021028037	0.022082019	0.058411215	0.018927445	0.004672897	0.012618297	0.039719626	0.069400631	0.028037383	0.066246057	0.077102804	0.078864353	0.063084112	0.056782334	0.037383178	0.028391167	0.051401869	0.05362776	0.039719626	0.041009464	0.014018692	0.003154574	0.03271028	0.022082019	0.011682243	0.012618297	0.11682243
YCL011C_YGL242C	0	0	3	7	1	1	103358	45197	102075	44652	427	181	6.16	3.85	48.728	20.073	0.102803738	0.071428571	0.044392523	0.049450549	0.053738318	0.115384615	0.021028037	0.010989011	0.058411215	0.010989011	0.004672897	0.005494505	0.039719626	0.043956044	0.028037383	0.032967033	0.077102804	0.10989011	0.063084112	0.049450549	0.037383178	0.043956044	0.051401869	0.049450549	0.039719626	0.054945055	0.014018692	0.010989011	0.03271028	0.016483516	0.011682243	0.021978022	0.11682243
YCL011C_YGL244W	0	0	3	7	1	0	103358	41498	102075	43174	427	558	6.16	5.12	48.728	65.868	0.102803738	0.04293381	0.044392523	0.050089445	0.053738318	0.067978533	0.021028037	0.023255814	0.058411215	0.041144902	0.004672897	0.001788909	0.039719626	0.105545617	0.028037383	0.048300537	0.077102804	0.125223614	0.063084112	0.066189624	0.037383178	0.019677996	0.051401869	0.04293381	0.039719626	0.023255814	0.014018692	0.003577818	0.03271028	0.044722719	0.011682243	0.016100179	0.11682243
YCL011C_YGR009C	0	0	3	7	1	1	103358	511006	102075	509051	427	651	6.16	4.86	48.728	73.623	0.102803738	0.052147239	0.044392523	0.078220859	0.053738318	0.061349693	0.021028037	0.027607362	0.058411215	0.021472393	0.004672897	0.003067485	0.039719626	0.059815951	0.028037383	0.081288344	0.077102804	0.090490798	0.063084112	0.09202454	0.037383178	0.039877301	0.051401869	0.033742331	0.039719626	0.02607362	0.014018692	0	0.03271028	0.038343558	0.011682243	0.009202454	0.11682243
YCL011C_YGR019W	0	0	3	7	1	0	103358	525233	102075	526648	427	471	6.16	6.78	48.728	52.946	0.102803738	0.065677966	0.044392523	0.086864407	0.053738318	0.093220339	0.021028037	0.008474576	0.058411215	0.048728814	0.004672897	0.012711864	0.039719626	0.084745763	0.028037383	0.040254237	0.077102804	0.065677966	0.063084112	0.059322034	0.037383178	0.061440678	0.051401869	0.042372881	0.039719626	0.061440678	0.014018692	0.016949153	0.03271028	0.046610169	0.011682243	0.025423729	0.11682243
YCL011C_YGR061C	0	0	3	7	1	1	103358	615969	102075	611893	427	1358	6.16	5.02	48.728	148.904	0.102803738	0.077262693	0.044392523	0.075791023	0.053738318	0.098601913	0.021028037	0.02281089	0.058411215	0.040470935	0.004672897	0.012509198	0.039719626	0.052244297	0.028037383	0.040470935	0.077102804	0.069168506	0.063084112	0.080941869	0.037383178	0.052244297	0.051401869	0.058130979	0.039719626	0.06254599	0.014018692	0.016188374	0.03271028	0.02281089	0.011682243	0.017660044	0.11682243
YCL011C_YGR072W	0	0	3	7	1	0	103358	634308	102075	635471	427	387	6.16	10.68	48.728	44.924	0.102803738	0.041237113	0.044392523	0.038659794	0.053738318	0.06443299	0.021028037	0.012886598	0.058411215	0.048969072	0.004672897	0.00257732	0.039719626	0.180412371	0.028037383	0.030927835	0.077102804	0.082474227	0.063084112	0.077319588	0.037383178	0.025773196	0.051401869	0.041237113	0.039719626	0.043814433	0.014018692	0.010309278	0.03271028	0.023195876	0.011682243	0.010309278	0.11682243
YCL011C_YGR129W	0	0	3	7	1	0	103358	750405	102075	751052	427	215	6.16	10.16	48.728	24.802	0.102803738	0.046296296	0.044392523	0.055555556	0.053738318	0.060185185	0.021028037	0.013888889	0.058411215	0.018518519	0.004672897	0.00462963	0.039719626	0.143518519	0.028037383	0.064814815	0.077102804	0.092592593	0.063084112	0.092592593	0.037383178	0.018518519	0.051401869	0.055555556	0.039719626	0.032407407	0.014018692	0	0.03271028	0.037037037	0.011682243	0.009259259	0.11682243
YCL011C_YGR142W	0	0	3	7	1	0	103358	772459	102075	773691	427	410	6.16	4.93	48.728	47.167	0.102803738	0.03406326	0.044392523	0.051094891	0.053738318	0.082725061	0.021028037	0.00973236	0.058411215	0.03649635	0.004672897	0.00243309	0.039719626	0.111922141	0.028037383	0.03406326	0.077102804	0.136253041	0.063084112	0.109489051	0.037383178	0.03892944	0.051401869	0.03649635	0.039719626	0.060827251	0.014018692	0.01216545	0.03271028	0.03406326	0.011682243	0.01703163	0.11682243
YCL011C_YGR145W	0	0	3	7	1	0	103358	781772	102075	783895	427	707	6.16	6.55	48.728	81.747	0.102803738	0.056497175	0.044392523	0.043785311	0.053738318	0.064971751	0.021028037	0.016949153	0.058411215	0.040960452	0.004672897	0.008474576	0.039719626	0.088983051	0.028037383	0.031073446	0.077102804	0.097457627	0.063084112	0.080508475	0.037383178	0.026836158	0.051401869	0.055084746	0.039719626	0.052259887	0.014018692	0.007062147	0.03271028	0.036723164	0.011682243	0.016949153	0.11682243
YCL011C_YGR147C	0	0	3	7	1	1	103358	786925	102075	786059	427	288	6.16	10.74	48.728	32.804	0.102803738	0.062283737	0.044392523	0.055363322	0.053738318	0.096885813	0.021028037	0.031141869	0.058411215	0.044982699	0.004672897	0.010380623	0.039719626	0.110726644	0.028037383	0.041522491	0.077102804	0.051903114	0.063084112	0.07266436	0.037383178	0.041522491	0.051401869	0.062283737	0.039719626	0.065743945	0.014018692	0.01384083	0.03271028	0.024221453	0.011682243	0.020761246	0.11682243
YCL011C_YGR151C	NA	NA	NA	NA	NA	NA	NA	NA	NA	NA	NA	NA	NA	NA	NA	NA	NA	NA	NA	NA	NA	NA	NA	NA	NA	NA	NA	NA	NA	NA	NA	NA	NA	NA	NA	NA	NA	NA	NA	NA	NA	NA	NA	NA	NA	NA	NA	NA	NA
YCL011C_YGR152C	0	0	3	7	1	1	103358	795497	102075	794679	427	272	6.16	9.97	48.728	30.39	0.102803738	0.054945055	0.044392523	0.047619048	0.053738318	0.076923077	0.021028037	0.021978022	0.058411215	0.025641026	0.004672897	0.003663004	0.039719626	0.091575092	0.028037383	0.062271062	0.077102804	0.065934066	0.063084112	0.113553114	0.037383178	0.029304029	0.051401869	0.091575092	0.039719626	0.058608059	0.014018692	0.007326007	0.03271028	0.029304029	0.011682243	0.007326007	0.11682243
YCL011C_YGR169C-A	NA	NA	NA	NA	NA	NA	NA	NA	NA	NA	NA	NA	NA	NA	NA	NA	NA	NA	NA	NA	NA	NA	NA	NA	NA	NA	NA	NA	NA	NA	NA	NA	NA	NA	NA	NA	NA	NA	NA	NA	NA	NA	NA	NA	NA	NA	NA	NA	NA
YCL011C_YGR187C	0	0	3	7	1	1	103358	871421	102075	870237	427	394	6.16	4.45	48.728	44.951	0.102803738	0.040506329	0.044392523	0.055696203	0.053738318	0.116455696	0.021028037	0.027848101	0.058411215	0.040506329	0.004672897	0.002531646	0.039719626	0.075949367	0.028037383	0.017721519	0.077102804	0.113924051	0.063084112	0.058227848	0.037383178	0.040506329	0.051401869	0.065822785	0.039719626	0.078481013	0.014018692	0.017721519	0.03271028	0.027848101	0.011682243	0.015189873	0.11682243
YCL011C_YGR245C	0	0	3	7	1	1	103358	982073	102075	979770	427	767	6.16	6.92	48.728	86.618	0.102803738	0.061197917	0.044392523	0.071614583	0.053738318	0.095052083	0.021028037	0.029947917	0.058411215	0.03125	0.004672897	0.0078125	0.039719626	0.098958333	0.028037383	0.04296875	0.077102804	0.087239583	0.063084112	0.069010417	0.037383178	0.024739583	0.051401869	0.053385417	0.039719626	0.05078125	0.014018692	0.010416667	0.03271028	0.016927083	0.011682243	0.01953125	0.11682243
YCL011C_YGR268C	0	0	3	7	1	1	103358	1026659	102075	1026063	427	198	6.16	9.78	48.728	22.435	0.102803738	0.065326633	0.044392523	0.040201005	0.053738318	0.055276382	0.021028037	0.015075377	0.058411215	0.015075377	0.004672897	0.015075377	0.039719626	0.030150754	0.028037383	0.070351759	0.077102804	0.035175879	0.063084112	0.090452261	0.037383178	0.135678392	0.051401869	0.035175879	0.039719626	0.020100503	0.014018692	0.040201005	0.03271028	0.060301508	0.011682243	0.030150754	0.11682243
YCL011C_YGR271C-A	0	0	3	7	1	1	103358	1038507	102075	1037806	427	233	6.16	10.27	48.728	27.121	0.102803738	0.034188034	0.044392523	0.051282051	0.053738318	0.123931624	0.021028037	0.021367521	0.058411215	0.02991453	0.004672897	0	0.039719626	0.14957265	0.028037383	0.042735043	0.077102804	0.08974359	0.063084112	0.051282051	0.037383178	0.02991453	0.051401869	0.038461538	0.039719626	0.055555556	0.014018692	0.004273504	0.03271028	0.021367521	0.011682243	0.008547009	0.11682243
YCL011C_YGR275W	0	0	3	7	1	0	103358	1043283	102075	1043756	427	157	6.16	5.43	48.728	17.795	0.102803738	0.056962025	0.044392523	0.050632911	0.053738318	0.069620253	0.021028037	0.025316456	0.058411215	0.012658228	0.004672897	0.018987342	0.039719626	0.094936709	0.028037383	0.063291139	0.077102804	0.069620253	0.063084112	0.094936709	0.037383178	0.044303797	0.051401869	0.044303797	0.039719626	0.03164557	0.014018692	0.006329114	0.03271028	0.037974684	0.011682243	0.006329114	0.11682243
YCL011C_YGR280C	0	0	3	7	1	1	103358	1051732	102075	1050917	427	271	6.16	10.67	48.728	31.311	0.102803738	0.0625	0.044392523	0.047794118	0.053738318	0.066176471	0.021028037	0.018382353	0.058411215	0.029411765	0.004672897	0.018382353	0.039719626	0.209558824	0.028037383	0.022058824	0.077102804	0.069852941	0.063084112	0.073529412	0.037383178	0.018382353	0.051401869	0.025735294	0.039719626	0.040441176	0.014018692	0.003676471	0.03271028	0.003676471	0.011682243	0.033088235	0.11682243
YCL011C_YHL019C	0	0	3	8	1	1	103358	69545	102075	67728	427	605	6.16	6.83	48.728	69.989	0.102803738	0.034653465	0.044392523	0.024752475	0.053738318	0.085808581	0.021028037	0.01980198	0.058411215	0.04620462	0.004672897	0.008250825	0.039719626	0.099009901	0.028037383	0.03960396	0.077102804	0.075907591	0.063084112	0.079207921	0.037383178	0.04620462	0.051401869	0.067656766	0.039719626	0.077557756	0.014018692	0.014851485	0.03271028	0.0330033	0.011682243	0.021452145	0.11682243
YCL011C_YHL025W	0	0	3	8	1	0	103358	54849	102075	55847	427	332	6.16	5.5	48.728	37.606	0.102803738	0.054054054	0.044392523	0.078078078	0.053738318	0.072072072	0.021028037	0.024024024	0.058411215	0.039039039	0.004672897	0.003003003	0.039719626	0.054054054	0.028037383	0.093093093	0.077102804	0.069069069	0.063084112	0.078078078	0.037383178	0.039039039	0.051401869	0.06006006	0.039719626	0.036036036	0.014018692	0.003003003	0.03271028	0.039039039	0.011682243	0.027027027	0.11682243
YCL011C_YHR027C	0	0	3	8	1	1	103358	164704	102075	161723	427	993	6.16	4.35	48.728	109.491	0.102803738	0.067404427	0.044392523	0.076458753	0.053738318	0.115694165	0.021028037	0.023138833	0.058411215	0.028169014	0.004672897	0.006036217	0.039719626	0.063380282	0.028037383	0.034205231	0.077102804	0.098591549	0.063084112	0.075452716	0.037383178	0.032193159	0.051401869	0.064386318	0.039719626	0.056338028	0.014018692	0.00804829	0.03271028	0.031187123	0.011682243	0.022132797	0.11682243
YCL011C_YHR046C	0	0	3	8	1	1	103358	198278	102075	197391	427	295	6.16	5	48.728	32.823	0.102803738	0.087837838	0.044392523	0.043918919	0.053738318	0.067567568	0.021028037	0.023648649	0.058411215	0.037162162	0.004672897	0.02027027	0.039719626	0.077702703	0.028037383	0.02027027	0.077102804	0.054054054	0.063084112	0.077702703	0.037383178	0.030405405	0.051401869	0.081081081	0.039719626	0.067567568	0.014018692	0.023648649	0.03271028	0.050675676	0.011682243	0.013513514	0.11682243
YCL011C_YHR066W	0	0	3	8	1	0	103358	229337	102075	230698	427	453	6.16	10.05	48.728	51.764	0.102803738	0.04185022	0.044392523	0.046255507	0.053738318	0.085903084	0.021028037	0.024229075	0.058411215	0.028634361	0.004672897	0	0.039719626	0.121145374	0.028037383	0.04845815	0.077102804	0.0969163	0.063084112	0.081497797	0.037383178	0.044052863	0.051401869	0.066079295	0.039719626	0.050660793	0.014018692	0.004405286	0.03271028	0.011013216	0.011682243	0.026431718	0.11682243
YCL011C_YHR081W	0	0	3	8	1	0	103358	267540	102075	268094	427	184	6.16	10.39	48.728	21.045	0.102803738	0.037837838	0.044392523	0.048648649	0.053738318	0.097297297	0.021028037	0.027027027	0.058411215	0.027027027	0.004672897	0	0.039719626	0.167567568	0.028037383	0.032432432	0.077102804	0.086486486	0.063084112	0.108108108	0.037383178	0.021621622	0.051401869	0.037837838	0.039719626	0.064864865	0.014018692	0	0.03271028	0.027027027	0.011682243	0.010810811	0.11682243
YCL011C_YHR089C	0	0	3	8	1	1	103358	283300	102075	282683	427	205	6.16	12	48.728	21.48	0.102803738	0.242718447	0.044392523	0.038834951	0.053738318	0.038834951	0.021028037	0.014563107	0.058411215	0.077669903	0.004672897	0	0.039719626	0.067961165	0.028037383	0.019417476	0.077102804	0.033980583	0.063084112	0.077669903	0.037383178	0.063106796	0.051401869	0.038834951	0.039719626	0.038834951	0.014018692	0.014563107	0.03271028	0.014563107	0.011682243	0.004854369	0.11682243
YCL011C_YHR106W	0	0	3	8	1	0	103358	325601	102075	326629	427	342	6.16	6.87	48.728	37.087	0.102803738	0.081632653	0.044392523	0.102040816	0.053738318	0.067055394	0.021028037	0.029154519	0.058411215	0.040816327	0.004672897	0.005830904	0.039719626	0.058309038	0.028037383	0.026239067	0.077102804	0.069970845	0.063084112	0.075801749	0.037383178	0.040816327	0.051401869	0.067055394	0.039719626	0.075801749	0.014018692	0.011661808	0.03271028	0.026239067	0.011682243	0.020408163	0.11682243
YCL011C_YHR214W-A	NA	NA	NA	NA	NA	NA	NA	NA	NA	NA	NA	NA	NA	NA	NA	NA	NA	NA	NA	NA	NA	NA	NA	NA	NA	NA	NA	NA	NA	NA	NA	NA	NA	NA	NA	NA	NA	NA	NA	NA	NA	NA	NA	NA	NA	NA	NA	NA	NA
YCL011C_YIL075C	0	0	3	9	1	1	103358	220697	102075	217860	427	945	6.16	6.07	48.728	104.231	0.102803738	0.063424947	0.044392523	0.093023256	0.053738318	0.109936575	0.021028037	0.022198732	0.058411215	0.040169133	0.004672897	0.005285412	0.039719626	0.079281184	0.028037383	0.032769556	0.077102804	0.063424947	0.063084112	0.071881607	0.037383178	0.029598309	0.051401869	0.062367865	0.039719626	0.058139535	0.014018692	0.00845666	0.03271028	0.035940803	0.011682243	0.012684989	0.11682243
YCL011C_YIL077C	0	0	3	9	1	1	103358	215950	102075	214988	427	320	6.16	9.77	48.728	36.946	0.102803738	0.080996885	0.044392523	0.046728972	0.053738318	0.062305296	0.021028037	0.034267913	0.058411215	0.052959502	0.004672897	0.018691589	0.039719626	0.07165109	0.028037383	0.052959502	0.077102804	0.062305296	0.063084112	0.096573209	0.037383178	0.046728972	0.051401869	0.031152648	0.039719626	0.034267913	0.014018692	0	0.03271028	0.049844237	0.011682243	0.009345794	0.11682243
YCL011C_YIL126W	0	0	3	9	1	0	103358	117992	102075	122071	427	1359	6.16	6.68	48.728	156.741	0.102803738	0.036764706	0.044392523	0.059558824	0.053738318	0.106617647	0.021028037	0.017647059	0.058411215	0.036029412	0.004672897	0.007352941	0.039719626	0.094852941	0.028037383	0.049264706	0.077102804	0.099264706	0.063084112	0.061029412	0.037383178	0.032352941	0.051401869	0.043382353	0.039719626	0.0625	0.014018692	0.004411765	0.03271028	0.022058824	0.011682243	0.017647059	0.11682243
YCL011C_YIL136W	0	0	3	9	1	0	103358	93619	102075	94800	427	393	6.16	9.38	48.728	44.58	0.102803738	0.065989848	0.044392523	0.106598985	0.053738318	0.068527919	0.021028037	0.012690355	0.058411215	0.02284264	0.004672897	0.025380711	0.039719626	0.124365482	0.028037383	0.058375635	0.077102804	0.109137056	0.063084112	0.086294416	0.037383178	0.015228426	0.051401869	0.030456853	0.039719626	0.032994924	0.014018692	0	0.03271028	0.025380711	0.011682243	0.005076142	0.11682243
YCL011C_YIL154C	0	0	3	9	1	1	103358	55021	102075	53981	427	346	6.16	4.78	48.728	39.07	0.102803738	0.057636888	0.044392523	0.043227666	0.053738318	0.095100865	0.021028037	0.028818444	0.058411215	0.023054755	0.004672897	0.008645533	0.039719626	0.057636888	0.028037383	0.031700288	0.077102804	0.095100865	0.063084112	0.100864553	0.037383178	0.031700288	0.051401869	0.077809798	0.039719626	0.043227666	0.014018692	0.014409222	0.03271028	0.023054755	0.011682243	0.028818444	0.11682243
YCL011C_YIR024C	0	0	3	9	1	1	103358	403488	102075	402838	427	216	6.16	9.65	48.728	24.597	0.102803738	0.050691244	0.044392523	0.059907834	0.053738318	0.105990783	0.021028037	0.041474654	0.058411215	0.02764977	0.004672897	0.004608295	0.039719626	0.133640553	0.028037383	0.013824885	0.077102804	0.087557604	0.063084112	0.036866359	0.037383178	0.02764977	0.051401869	0.073732719	0.039719626	0.087557604	0.014018692	0	0.03271028	0.00921659	0.011682243	0.013824885	0.11682243
YCL011C_YIR035C	0	0	3	9	1	1	103358	421787	102075	421023	427	254	6.16	6.29	48.728	27.48	0.102803738	0.078431373	0.044392523	0.090196078	0.053738318	0.090196078	0.021028037	0.02745098	0.058411215	0.039215686	0.004672897	0.007843137	0.039719626	0.074509804	0.028037383	0.02745098	0.077102804	0.043137255	0.063084112	0.078431373	0.037383178	0.035294118	0.051401869	0.121568627	0.039719626	0.050980392	0.014018692	0.003921569	0.03271028	0.035294118	0.011682243	0.011764706	0.11682243
YCL011C_YJL008C	0	0	3	10	1	1	103358	421656	102075	419950	427	568	6.16	5.53	48.728	61.662	0.102803738	0.086115993	0.044392523	0.080843585	0.053738318	0.096660808	0.021028037	0.036906854	0.058411215	0.019332162	0.004672897	0.001757469	0.039719626	0.072056239	0.028037383	0.033391916	0.077102804	0.079086116	0.063084112	0.049209139	0.037383178	0.042179262	0.051401869	0.082601054	0.039719626	0.079086116	0.014018692	0.010544815	0.03271028	0.019332162	0.011682243	0.017574692	0.11682243
YCL011C_YJL104W	0	0	3	10	1	0	103358	227322	102075	227771	427	149	6.16	10.25	48.728	16.216	0.102803738	0.086666667	0.044392523	0.126666667	0.053738318	0.046666667	0.021028037	0.013333333	0.058411215	0.04	0.004672897	0.006666667	0.039719626	0.093333333	0.028037383	0.053333333	0.077102804	0.066666667	0.063084112	0.093333333	0.037383178	0.02	0.051401869	0.033333333	0.039719626	0.046666667	0.014018692	0.006666667	0.03271028	0.033333333	0.011682243	0.006666667	0.11682243
YCL011C_YJL115W	0	0	3	10	1	0	103358	196284	102075	197123	427	279	6.16	3.71	48.728	31.603	0.102803738	0.057142857	0.044392523	0.039285714	0.053738318	0.064285714	0.021028037	0.003571429	0.058411215	0.025	0.004672897	0.007142857	0.039719626	0.046428571	0.028037383	0.014285714	0.077102804	0.207142857	0.063084112	0.064285714	0.037383178	0.05	0.051401869	0.078571429	0.039719626	0.042857143	0.014018692	0.007142857	0.03271028	0.025	0.011682243	0.010714286	0.11682243
YCL011C_YJL123C	0	0	3	10	1	1	103358	189438	102075	188002	427	478	6.16	4.32	48.728	53.477	0.102803738	0.06263048	0.044392523	0.048016701	0.053738318	0.06263048	0.021028037	0.008350731	0.058411215	0.033402923	0.004672897	0.016701461	0.039719626	0.098121086	0.028037383	0.052192067	0.077102804	0.133611691	0.063084112	0.096033403	0.037383178	0.03131524	0.051401869	0.060542797	0.039719626	0.056367432	0.014018692	0	0.03271028	0.010438413	0.011682243	0.012526096	0.11682243
YCL011C_YJL125C	0	0	3	10	1	1	103358	186676	102075	185525	427	383	6.16	7.58	48.728	43.919	0.102803738	0.0625	0.044392523	0.0390625	0.053738318	0.067708333	0.021028037	0.018229167	0.058411215	0.052083333	0.004672897	0.013020833	0.039719626	0.075520833	0.028037383	0.028645833	0.077102804	0.078125	0.063084112	0.080729167	0.037383178	0.036458333	0.051401869	0.0703125	0.039719626	0.059895833	0.014018692	0.015625	0.03271028	0.028645833	0.011682243	0.036458333	0.11682243
YCL011C_YJL144W	0	0	3	10	1	0	103358	146355	102075	146669	427	104	6.16	6.95	48.728	11.659	0.102803738	0.095238095	0.044392523	0	0.053738318	0.057142857	0.021028037	0.019047619	0.058411215	0.019047619	0.004672897	0	0.039719626	0.019047619	0.028037383	0.047619048	0.077102804	0.057142857	0.063084112	0.133333333	0.037383178	0.028571429	0.051401869	0.047619048	0.039719626	0.047619048	0.014018692	0.00952381	0.03271028	0.038095238	0.011682243	0.038095238	0.11682243
YCL011C_YJL148W	0	0	3	10	1	0	103358	140433	102075	141134	427	233	6.16	9.47	48.728	26.875	0.102803738	0.017094017	0.044392523	0.038461538	0.053738318	0.05982906	0.021028037	0.017094017	0.058411215	0.038461538	0.004672897	0.004273504	0.039719626	0.192307692	0.028037383	0.021367521	0.077102804	0.08974359	0.063084112	0.106837607	0.037383178	0.042735043	0.051401869	0.05982906	0.039719626	0.042735043	0.014018692	0.004273504	0.03271028	0.017094017	0.011682243	0.02991453	0.11682243
YCL011C_YJL184W	0	0	3	10	1	0	103358	83446	102075	83817	427	123	6.16	4.55	48.728	13.605	0.102803738	0.096774194	0.044392523	0.064516129	0.053738318	0.088709677	0.021028037	0.024193548	0.058411215	0.016129032	0.004672897	0	0.039719626	0.072580645	0.028037383	0.064516129	0.077102804	0.080645161	0.063084112	0.040322581	0.037383178	0.056451613	0.051401869	0.032258065	0.039719626	0.040322581	0.014018692	0	0.03271028	0.024193548	0.011682243	0.008064516	0.11682243
YCL011C_YJL203W	0	0	3	10	1	0	103358	53341	102075	54183	427	280	6.16	8.11	48.728	33.052	0.102803738	0.042704626	0.044392523	0.03202847	0.053738318	0.060498221	0.021028037	0.021352313	0.058411215	0.056939502	0.004672897	0.007117438	0.039719626	0.128113879	0.028037383	0.046263345	0.077102804	0.103202847	0.063084112	0.060498221	0.037383178	0.03202847	0.051401869	0.042704626	0.039719626	0.06405694	0.014018692	0.007117438	0.03271028	0.03202847	0.011682243	0.017793594	0.11682243
YCL011C_YJR050W	0	0	3	10	1	0	103358	528689	102075	529396	427	235	6.16	10.15	48.728	28.024	0.102803738	0.033898305	0.044392523	0.046610169	0.053738318	0.080508475	0.021028037	0.029661017	0.058411215	0.021186441	0.004672897	0.029661017	0.039719626	0.110169492	0.028037383	0.059322034	0.077102804	0.097457627	0.063084112	0.063559322	0.037383178	0.025423729	0.051401869	0.055084746	0.039719626	0.042372881	0.014018692	0.004237288	0.03271028	0.033898305	0.011682243	0.029661017	0.11682243
YCL011C_YJR058C	0	0	3	10	1	1	103358	545167	102075	544724	427	147	6.16	4.85	48.728	17.373	0.102803738	0.040540541	0.044392523	0.033783784	0.053738318	0.108108108	0.021028037	0.040540541	0.058411215	0.081081081	0.004672897	0.006756757	0.039719626	0.033783784	0.028037383	0.047297297	0.077102804	0.054054054	0.063084112	0.067567568	0.037383178	0.013513514	0.051401869	0.087837838	0.039719626	0.087837838	0.014018692	0.02027027	0.03271028	0.047297297	0.011682243	0.033783784	0.11682243
YCL011C_YJR067C	0	0	3	10	1	1	103358	567436	102075	567011	427	141	6.16	4.94	48.728	16.076	0.102803738	0.070422535	0.044392523	0.035211268	0.053738318	0.091549296	0.021028037	0.014084507	0.058411215	0.035211268	0.004672897	0.021126761	0.039719626	0.091549296	0.028037383	0.035211268	0.077102804	0.077464789	0.063084112	0.077464789	0.037383178	0.035211268	0.051401869	0.049295775	0.039719626	0.070422535	0.014018692	0.007042254	0.03271028	0.028169014	0.011682243	0.021126761	0.11682243
YCL011C_YJR072C	0	0	3	10	1	1	103358	572116	102075	570959	427	385	6.16	4.58	48.728	43.194	0.102803738	0.056994819	0.044392523	0.064766839	0.053738318	0.069948187	0.021028037	0.038860104	0.058411215	0.041450777	0.004672897	0.005181347	0.039719626	0.077720207	0.028037383	0.044041451	0.077102804	0.077720207	0.063084112	0.088082902	0.037383178	0.031088083	0.051401869	0.059585492	0.039719626	0.062176166	0.014018692	0.015544041	0.03271028	0.038860104	0.011682243	0.002590674	0.11682243
YCL011C_YKL021C	0	0	3	11	1	1	103358	398393	102075	396987	427	468	6.16	8.58	48.728	53.672	0.102803738	0.051172708	0.044392523	0.046908316	0.053738318	0.089552239	0.021028037	0.019189765	0.058411215	0.044776119	0.004672897	0.012793177	0.039719626	0.106609808	0.028037383	0.025586354	0.077102804	0.074626866	0.063084112	0.078891258	0.037383178	0.019189765	0.051401869	0.061833689	0.039719626	0.066098081	0.014018692	0.017057569	0.03271028	0.02771855	0.011682243	0.036247335	0.11682243
YCL011C_YKL028W	0	0	3	11	1	0	103358	385401	102075	386849	427	482	6.16	4.22	48.728	54.741	0.102803738	0.033126294	0.044392523	0.076604555	0.053738318	0.080745342	0.021028037	0.020703934	0.058411215	0.022774327	0.004672897	0.004140787	0.039719626	0.070393375	0.028037383	0.045548654	0.077102804	0.124223602	0.063084112	0.057971014	0.037383178	0.043478261	0.051401869	0.047619048	0.039719626	0.047619048	0.014018692	0.008281573	0.03271028	0.026915114	0.011682243	0.014492754	0.11682243
YCL011C_YKL082C	0	0	3	11	1	1	103358	281973	102075	280669	427	434	6.16	10.37	48.728	50.481	0.102803738	0.04137931	0.044392523	0.064367816	0.053738318	0.068965517	0.021028037	0.025287356	0.058411215	0.016091954	0.004672897	0.006896552	0.039719626	0.193103448	0.028037383	0.048275862	0.077102804	0.126436782	0.063084112	0.066666667	0.037383178	0.027586207	0.051401869	0.032183908	0.039719626	0.048275862	0.014018692	0	0.03271028	0.009195402	0.011682243	0.004597701	0.11682243
YCL011C_YKL113C	0	0	3	11	1	1	103358	225519	102075	224371	427	382	6.16	9.51	48.728	43.279	0.102803738	0.065274151	0.044392523	0.065274151	0.053738318	0.096605744	0.021028037	0.026109661	0.058411215	0.033942559	0.004672897	0.007832898	0.039719626	0.114882507	0.028037383	0.033942559	0.077102804	0.096605744	0.063084112	0.057441253	0.037383178	0.039164491	0.051401869	0.046997389	0.039719626	0.070496084	0.014018692	0.018276762	0.03271028	0.023498695	0.011682243	0.018276762	0.11682243
YCL011C_YKL117W	0	0	3	11	1	0	103358	219968	102075	220618	427	216	6.16	4.29	48.728	24.082	0.102803738	0.092165899	0.044392523	0.078341014	0.053738318	0.059907834	0.021028037	0.046082949	0.058411215	0.023041475	0.004672897	0.013824885	0.039719626	0.078341014	0.028037383	0.059907834	0.077102804	0.105990783	0.063084112	0.050691244	0.037383178	0.046082949	0.051401869	0.050691244	0.039719626	0.046082949	0.014018692	0.004608295	0.03271028	0.041474654	0.011682243	0.02764977	0.11682243
YCL011C_YKL129C	0	0	3	11	1	1	103358	200163	102075	196348	427	1271	6.16	10.24	48.728	142.506	0.102803738	0.05581761	0.044392523	0.078616352	0.053738318	0.067610063	0.021028037	0.019654088	0.058411215	0.036163522	0.004672897	0.007861635	0.039719626	0.102987421	0.028037383	0.044025157	0.077102804	0.051100629	0.063084112	0.080188679	0.037383178	0.047955975	0.051401869	0.054245283	0.039719626	0.06918239	0.014018692	0.007861635	0.03271028	0.039308176	0.011682243	0.018867925	0.11682243
YCL011C_YKL143W	0	0	3	11	1	0	103358	176786	102075	178177	427	463	6.16	4.36	48.728	53.39	0.102803738	0.043103448	0.044392523	0.051724138	0.053738318	0.068965517	0.021028037	0.019396552	0.058411215	0.040948276	0.004672897	0.002155172	0.039719626	0.094827586	0.028037383	0.043103448	0.077102804	0.129310345	0.063084112	0.079741379	0.037383178	0.034482759	0.051401869	0.05387931	0.039719626	0.040948276	0.014018692	0	0.03271028	0.034482759	0.011682243	0.015086207	0.11682243
YCL011C_YKL145W	0	0	3	11	1	0	103358	174218	102075	175621	427	467	6.16	5.17	48.728	51.982	0.102803738	0.076923077	0.044392523	0.068376068	0.053738318	0.074786325	0.021028037	0.025641026	0.058411215	0.02991453	0.004672897	0.006410256	0.039719626	0.076923077	0.028037383	0.025641026	0.077102804	0.081196581	0.063084112	0.055555556	0.037383178	0.055555556	0.051401869	0.064102564	0.039719626	0.061965812	0.014018692	0.012820513	0.03271028	0.023504274	0.011682243	0.006410256	0.11682243
YCL011C_YKL172W	0	0	3	11	1	0	103358	125764	102075	127047	427	427	6.16	6.36	48.728	49.734	0.102803738	0.037383178	0.044392523	0.065420561	0.053738318	0.070093458	0.021028037	0.018691589	0.058411215	0.028037383	0.004672897	0.002336449	0.039719626	0.163551402	0.028037383	0.046728972	0.077102804	0.163551402	0.063084112	0.070093458	0.037383178	0.018691589	0.051401869	0.049065421	0.039719626	0.018691589	0.014018692	0	0.03271028	0.011682243	0.011682243	0.025700935	0.11682243
YCL011C_YKL195W	0	0	3	11	1	0	103358	75826	102075	77037	427	403	6.16	4.29	48.728	44.536	0.102803738	0.059405941	0.044392523	0.066831683	0.053738318	0.03960396	0.021028037	0.017326733	0.058411215	0.022277228	0.004672897	0.002475248	0.039719626	0.091584158	0.028037383	0.04950495	0.077102804	0.146039604	0.063084112	0.111386139	0.037383178	0.042079208	0.051401869	0.03960396	0.039719626	0.022277228	0.014018692	0.01980198	0.03271028	0.012376238	0.011682243	0.014851485	0.11682243
YCL011C_YKL201C	0	0	3	11	1	1	103358	67467	102075	63931	427	1178	6.16	6.46	48.728	139.38	0.102803738	0.030534351	0.044392523	0.029686175	0.053738318	0.102629347	0.021028037	0.010178117	0.058411215	0.051738762	0.004672897	0.011026293	0.039719626	0.124681934	0.028037383	0.039864292	0.077102804	0.107718405	0.063084112	0.067005937	0.037383178	0.038167939	0.051401869	0.033927057	0.039719626	0.050042409	0.014018692	0.005089059	0.03271028	0.045801527	0.011682243	0.019508058	0.11682243
YCL011C_YKL213C	0	0	3	11	1	1	103358	34108	102075	31961	427	715	6.16	4.71	48.728	79.505	0.102803738	0.062849162	0.044392523	0.053072626	0.053738318	0.085195531	0.021028037	0.011173184	0.058411215	0.036312849	0.004672897	0.019553073	0.039719626	0.068435754	0.028037383	0.036312849	0.077102804	0.058659218	0.063084112	0.096368715	0.037383178	0.030726257	0.051401869	0.087988827	0.039719626	0.07122905	0.014018692	0.011173184	0.03271028	0.034916201	0.011682243	0.01396648	0.11682243
YCL011C_YKR014C	0	0	3	11	1	1	103358	465714	102075	465010	427	234	6.16	4.52	48.728	26.132	0.102803738	0.072340426	0.044392523	0.05106383	0.053738318	0.085106383	0.021028037	0.008510638	0.058411215	0.029787234	0.004672897	0.008510638	0.039719626	0.076595745	0.028037383	0.063829787	0.077102804	0.085106383	0.063084112	0.076595745	0.037383178	0.025531915	0.051401869	0.068085106	0.039719626	0.059574468	0.014018692	0.012765957	0.03271028	0.029787234	0.011682243	0.008510638	0.11682243
YCL011C_YKR025W	0	0	3	11	1	0	103358	487413	102075	488261	427	282	6.16	4.22	48.728	32.142	0.102803738	0.035335689	0.044392523	0.081272085	0.053738318	0.056537102	0.021028037	0.014134276	0.058411215	0.035335689	0.004672897	0.010600707	0.039719626	0.070671378	0.028037383	0.049469965	0.077102804	0.137809187	0.063084112	0.053003534	0.037383178	0.042402827	0.051401869	0.081272085	0.039719626	0.049469965	0.014018692	0	0.03271028	0.024734982	0.011682243	0.014134276	0.11682243
YCL011C_YKR035W-A	0	0	3	11	1	0	103358	507581	102075	508195	427	204	6.16	6.87	48.728	23.091	0.102803738	0.029268293	0.044392523	0.087804878	0.053738318	0.097560976	0.021028037	0.053658537	0.058411215	0.019512195	0.004672897	0	0.039719626	0.107317073	0.028037383	0.07804878	0.077102804	0.082926829	0.063084112	0.073170732	0.037383178	0.004878049	0.051401869	0.073170732	0.039719626	0.029268293	0.014018692	0.004878049	0.03271028	0.009756098	0.011682243	0	0.11682243
YCL011C_YKR038C	0	0	3	11	1	1	103358	512801	102075	511641	427	386	6.16	7.18	48.728	42.748	0.102803738	0.07751938	0.044392523	0.074935401	0.053738318	0.095607235	0.021028037	0.033591731	0.058411215	0.025839793	0.004672897	0.007751938	0.039719626	0.062015504	0.028037383	0.031007752	0.077102804	0.056847545	0.063084112	0.041343669	0.037383178	0.043927649	0.051401869	0.07751938	0.039719626	0.069767442	0.014018692	0.025839793	0.03271028	0.031007752	0.011682243	0.025839793	0.11682243
YCL011C_YKR048C	0	0	3	11	1	1	103358	526282	102075	525029	427	417	6.16	4.06	48.728	47.884	0.102803738	0.050239234	0.044392523	0.04784689	0.053738318	0.093301435	0.021028037	0.009569378	0.058411215	0.04784689	0.004672897	0.009569378	0.039719626	0.066985646	0.028037383	0.066985646	0.077102804	0.14354067	0.063084112	0.055023923	0.037383178	0.052631579	0.051401869	0.038277512	0.039719626	0.057416268	0.014018692	0.009569378	0.03271028	0.023923445	0.011682243	0.009569378	0.11682243
YCL011C_YKR072C	0	0	3	11	1	1	103358	577765	102075	576077	427	562	6.16	4.4	48.728	62.478	0.102803738	0.040852575	0.044392523	0.04973357	0.053738318	0.062166963	0.021028037	0.028419183	0.058411215	0.014209591	0.004672897	0.012433393	0.039719626	0.079928952	0.028037383	0.04973357	0.077102804	0.069271758	0.063084112	0.087033748	0.037383178	0.065719361	0.051401869	0.055062167	0.039719626	0.065719361	0.014018692	0.005328597	0.03271028	0.010657194	0.011682243	0.014209591	0.11682243
YCL011C_YKR081C	0	0	3	11	1	1	103358	592182	102075	591148	427	344	6.16	9.75	48.728	39.598	0.102803738	0.060869565	0.044392523	0.04057971	0.053738318	0.086956522	0.021028037	0.046376812	0.058411215	0.060869565	0.004672897	0	0.039719626	0.124637681	0.028037383	0.043478261	0.077102804	0.069565217	0.063084112	0.055072464	0.037383178	0.043478261	0.051401869	0.052173913	0.039719626	0.049275362	0.014018692	0.005797101	0.03271028	0.023188406	0.011682243	0.020289855	0.11682243
YCL011C_YKR083C	0	0	3	11	1	1	103358	596464	102075	596063	427	133	6.16	3.97	48.728	15.071	0.102803738	0.052238806	0.044392523	0.044776119	0.053738318	0.097014925	0.021028037	0.037313433	0.058411215	0	0.004672897	0.014925373	0.039719626	0.074626866	0.028037383	0.074626866	0.077102804	0.126865672	0.063084112	0.074626866	0.037383178	0.02238806	0.051401869	0.029850746	0.039719626	0.082089552	0.014018692	0	0.03271028	0.014925373	0.011682243	0	0.11682243
YCL011C_YLL008W	0	0	3	12	1	0	103358	131728	102075	133986	427	752	6.16	5.51	48.728	84.842	0.102803738	0.061088977	0.044392523	0.06374502	0.053738318	0.082337317	0.021028037	0.026560425	0.058411215	0.03187251	0.004672897	0.003984064	0.039719626	0.107569721	0.028037383	0.033200531	0.077102804	0.111553785	0.063084112	0.069057105	0.037383178	0.030544489	0.051401869	0.062416999	0.039719626	0.061088977	0.014018692	0.001328021	0.03271028	0.011952191	0.011682243	0.01062417	0.11682243
YCL011C_YLR020C	0	0	3	12	1	1	103358	183404	102075	181788	427	538	6.16	8.91	48.728	62.446	0.102803738	0.048237477	0.044392523	0.051948052	0.053738318	0.105751391	0.021028037	0.031539889	0.058411215	0.05380334	0.004672897	0.025974026	0.039719626	0.079777365	0.028037383	0.027829314	0.077102804	0.048237477	0.063084112	0.066790353	0.037383178	0.044526902	0.051401869	0.057513915	0.039719626	0.057513915	0.014018692	0.003710575	0.03271028	0.037105751	0.011682243	0.027829314	0.11682243
YCL011C_YLR025W	0	0	3	12	1	0	103358	194453	102075	195175	427	240	6.16	4.48	48.728	26.987	0.102803738	0.037344398	0.044392523	0.070539419	0.053738318	0.091286307	0.021028037	0.041493776	0.058411215	0.012448133	0.004672897	0.008298755	0.039719626	0.091286307	0.028037383	0.049792531	0.077102804	0.145228216	0.063084112	0.087136929	0.037383178	0.020746888	0.051401869	0.045643154	0.039719626	0.062240664	0.014018692	0	0.03271028	0	0.011682243	0.012448133	0.11682243
YCL011C_YLR032W	0	0	3	12	1	0	103358	204992	102075	208501	427	1169	6.16	6.29	48.728	134.001	0.102803738	0.041880342	0.044392523	0.04017094	0.053738318	0.108547009	0.021028037	0.023931624	0.058411215	0.043589744	0.004672897	0.011111111	0.039719626	0.082051282	0.028037383	0.041880342	0.077102804	0.081196581	0.063084112	0.092307692	0.037383178	0.034188034	0.051401869	0.052991453	0.039719626	0.056410256	0.014018692	0.013675214	0.03271028	0.023931624	0.011682243	0.017948718	0.11682243
YCL011C_YLR051C	0	0	3	12	1	1	103358	246978	102075	246325	427	217	6.16	10.3	48.728	25.636	0.102803738	0.027522936	0.044392523	0.050458716	0.053738318	0.077981651	0.021028037	0.027522936	0.058411215	0.032110092	0.004672897	0.009174312	0.039719626	0.151376147	0.028037383	0.041284404	0.077102804	0.105504587	0.063084112	0.068807339	0.037383178	0.032110092	0.051401869	0.041284404	0.039719626	0.041284404	0.014018692	0	0.03271028	0.02293578	0.011682243	0.013761468	0.11682243
YCL011C_YLR055C	0	0	3	12	1	1	103358	253081	102075	251273	427	602	6.16	4.12	48.728	66.189	0.102803738	0.086235489	0.044392523	0.058043118	0.053738318	0.081260365	0.021028037	0.021558872	0.058411215	0.016583748	0.004672897	0.011608624	0.039719626	0.048092869	0.028037383	0.036484245	0.077102804	0.091210614	0.063084112	0.096185738	0.037383178	0.031509121	0.051401869	0.054726368	0.039719626	0.053067993	0.014018692	0.009950249	0.03271028	0.029850746	0.011682243	0.024875622	0.11682243
YCL011C_YLR068W	0	0	3	12	1	0	103358	271009	102075	271464	427	151	6.16	11.05	48.728	18.19	0.102803738	0.032894737	0.044392523	0.039473684	0.053738318	0.065789474	0.021028037	0.019736842	0.058411215	0.013157895	0.004672897	0	0.039719626	0.217105263	0.028037383	0.065789474	0.077102804	0.111842105	0.063084112	0.026315789	0.037383178	0.026315789	0.051401869	0.032894737	0.039719626	0.052631579	0.014018692	0	0.03271028	0.026315789	0.011682243	0	0.11682243
YCL011C_YLR088W	0	0	3	12	1	0	103358	316108	102075	317952	427	614	6.16	6.21	48.728	69.22	0.102803738	0.050406504	0.044392523	0.066666667	0.053738318	0.126829268	0.021028037	0.030894309	0.058411215	0.06504065	0.004672897	0.024390244	0.039719626	0.037398374	0.028037383	0.02601626	0.077102804	0.058536585	0.063084112	0.107317073	0.037383178	0.03902439	0.051401869	0.063414634	0.039719626	0.07804878	0.014018692	0.009756098	0.03271028	0.029268293	0.011682243	0.021138211	0.11682243
YCL011C_YLR090W	0	0	3	12	1	0	103358	320702	102075	322081	427	459	6.16	6.14	48.728	51.346	0.102803738	0.07826087	0.044392523	0.05	0.053738318	0.073913043	0.021028037	0.008695652	0.058411215	0.05	0.004672897	0.008695652	0.039719626	0.095652174	0.028037383	0.02173913	0.077102804	0.067391304	0.063084112	0.069565217	0.037383178	0.041304348	0.051401869	0.045652174	0.039719626	0.058695652	0.014018692	0.02826087	0.03271028	0.02826087	0.011682243	0.032608696	0.11682243
YCL011C_YLR114C	0	0	3	12	1	1	103358	377239	102075	374945	427	764	6.16	4.18	48.728	86.425	0.102803738	0.05620915	0.044392523	0.035294118	0.053738318	0.087581699	0.021028037	0.010457516	0.058411215	0.048366013	0.004672897	0.011764706	0.039719626	0.065359477	0.028037383	0.043137255	0.077102804	0.087581699	0.063084112	0.092810458	0.037383178	0.033986928	0.051401869	0.040522876	0.039719626	0.054901961	0.014018692	0.007843137	0.03271028	0.019607843	0.011682243	0.019607843	0.11682243
YCL011C_YLR129W	0	0	3	12	1	0	103358	399658	102075	402489	427	943	6.16	5.92	48.728	106.341	0.102803738	0.061440678	0.044392523	0.056144068	0.053738318	0.111228814	0.021028037	0.015889831	0.058411215	0.043432203	0.004672897	0.020127119	0.039719626	0.090042373	0.028037383	0.034957627	0.077102804	0.072033898	0.063084112	0.083686441	0.037383178	0.022245763	0.051401869	0.052966102	0.039719626	0.068855932	0.014018692	0.013771186	0.03271028	0.023305085	0.011682243	0.025423729	0.11682243
YCL011C_YLR138W	0	0	3	12	1	0	103358	418438	102075	421395	427	985	6.16	5.26	48.728	109.368	0.102803738	0.079107505	0.044392523	0.063894523	0.053738318	0.093306288	0.021028037	0.023326572	0.058411215	0.038539554	0.004672897	0.015212982	0.039719626	0.057809331	0.028037383	0.021298174	0.077102804	0.0831643	0.063084112	0.087221095	0.037383178	0.043610548	0.051401869	0.055780933	0.039719626	0.069979716	0.014018692	0.012170385	0.03271028	0.022312373	0.011682243	0.014198783	0.11682243
YCL011C_YLR170C	0	0	3	12	1	1	103358	501051	102075	500581	427	156	6.16	6.92	48.728	18.152	0.102803738	0.031847134	0.044392523	0.038216561	0.053738318	0.101910828	0.021028037	0.057324841	0.058411215	0.031847134	0.004672897	0.006369427	0.039719626	0.082802548	0.028037383	0.012738854	0.077102804	0.070063694	0.063084112	0.057324841	0.037383178	0.01910828	0.051401869	0.082802548	0.039719626	0.082802548	0.014018692	0.01910828	0.03271028	0.050955414	0.011682243	0.025477707	0.11682243
YCL011C_YLR175W	0	0	3	12	1	0	103358	506136	102075	507587	427	483	6.16	9.5	48.728	54.704	0.102803738	0.059917355	0.044392523	0.055785124	0.053738318	0.090909091	0.021028037	0.020661157	0.058411215	0.010330579	0.004672897	0.012396694	0.039719626	0.134297521	0.028037383	0.026859504	0.077102804	0.099173554	0.063084112	0.074380165	0.037383178	0.035123967	0.051401869	0.07231405	0.039719626	0.047520661	0.014018692	0.018595041	0.03271028	0.02892562	0.011682243	0.016528926	0.11682243
YCL011C_YLR196W	0	0	3	12	1	0	103358	543970	102075	545700	427	576	6.16	4.29	48.728	63.803	0.102803738	0.064124783	0.044392523	0.072790295	0.053738318	0.076256499	0.021028037	0.025996534	0.058411215	0.029462738	0.004672897	0.01559792	0.039719626	0.065857886	0.028037383	0.020797227	0.077102804	0.088388215	0.063084112	0.093587522	0.037383178	0.034662045	0.051401869	0.067590988	0.039719626	0.046793761	0.014018692	0.006932409	0.03271028	0.027729636	0.011682243	0.022530329	0.11682243
YCL011C_YLR214W	0	0	3	12	1	0	103358	568569	102075	570629	427	686	6.16	9.86	48.728	78.853	0.102803738	0.043668122	0.044392523	0.059679767	0.053738318	0.093158661	0.021028037	0.027656477	0.058411215	0.066957787	0.004672897	0.023289665	0.039719626	0.068413392	0.028037383	0.021834061	0.077102804	0.043668122	0.063084112	0.090247453	0.037383178	0.03202329	0.051401869	0.075691412	0.039719626	0.069868996	0.014018692	0.024745269	0.03271028	0.048034934	0.011682243	0.023289665	0.11682243
YCL011C_YLR218C	0	0	3	12	1	1	103358	573920	102075	573468	427	150	6.16	8.68	48.728	17.253	0.102803738	0.066225166	0.044392523	0.039735099	0.053738318	0.066225166	0.021028037	0.01986755	0.058411215	0.033112583	0.004672897	0.026490066	0.039719626	0.145695364	0.028037383	0.052980132	0.077102804	0.099337748	0.063084112	0.072847682	0.037383178	0.026490066	0.051401869	0.059602649	0.039719626	0.013245033	0.014018692	0.039735099	0.03271028	0.026490066	0.011682243	0.013245033	0.11682243
YCL011C_YLR259C	0	0	3	12	1	1	103358	665004	102075	663286	427	572	6.16	5.06	48.728	60.751	0.102803738	0.097731239	0.044392523	0.097731239	0.053738318	0.085514834	0.021028037	0.019197208	0.058411215	0.02443281	0.004672897	0	0.039719626	0.076788831	0.028037383	0.022687609	0.077102804	0.089005236	0.063084112	0.066317627	0.037383178	0.040139616	0.051401869	0.085514834	0.039719626	0.073298429	0.014018692	0.008726003	0.03271028	0.012216405	0.011682243	0.003490401	0.11682243
YCL011C_YLR348C	0	0	3	12	1	1	103358	827872	102075	826976	427	298	6.16	10.46	48.728	32.991	0.102803738	0.080267559	0.044392523	0.100334448	0.053738318	0.10367893	0.021028037	0.046822742	0.058411215	0.046822742	0.004672897	0.013377926	0.039719626	0.070234114	0.028037383	0.023411371	0.077102804	0.033444816	0.063084112	0.050167224	0.037383178	0.046822742	0.051401869	0.066889632	0.039719626	0.043478261	0.014018692	0.010033445	0.03271028	0.043478261	0.011682243	0.013377926	0.11682243
YCL011C_YLR441C	0	0	3	12	1	1	103358	1018905	102075	1018138	427	255	6.16	10.79	48.728	28.743	0.102803738	0.0625	0.044392523	0.05859375	0.053738318	0.0859375	0.021028037	0.015625	0.058411215	0.04296875	0.004672897	0.0078125	0.039719626	0.1328125	0.028037383	0.04296875	0.077102804	0.0625	0.063084112	0.0625	0.037383178	0.01953125	0.051401869	0.09375	0.039719626	0.0546875	0.014018692	0.00390625	0.03271028	0.0078125	0.011682243	0.0234375	0.11682243
YCL011C_YLR449W	0	0	3	12	1	0	103358	1030830	102075	1032008	427	392	6.16	4.41	48.728	43.903	0.102803738	0.066157761	0.044392523	0.048346056	0.053738318	0.061068702	0.021028037	0.015267176	0.058411215	0.022900763	0.004672897	0.002544529	0.039719626	0.119592875	0.028037383	0.025445293	0.077102804	0.13740458	0.063084112	0.076335878	0.037383178	0.055979644	0.051401869	0.061068702	0.039719626	0.048346056	0.014018692	0.002544529	0.03271028	0.030534351	0.011682243	0.007633588	0.11682243
YCL011C_YML008C	0	0	3	13	1	1	103358	252990	102075	251839	427	383	6.16	5.6	48.728	43.431	0.102803738	0.075520833	0.044392523	0.09375	0.053738318	0.0703125	0.021028037	0.028645833	0.058411215	0.049479167	0.004672897	0.013020833	0.039719626	0.078125	0.028037383	0.03125	0.077102804	0.0859375	0.063084112	0.046875	0.037383178	0.028645833	0.051401869	0.0625	0.039719626	0.03125	0.014018692	0.010416667	0.03271028	0.059895833	0.011682243	0.020833333	0.11682243
YCL011C_YML010W	0	0	3	13	1	0	103358	247677	102075	250868	427	1063	6.16	4.95	48.728	115.649	0.102803738	0.102443609	0.044392523	0.073308271	0.053738318	0.05075188	0.021028037	0.015037594	0.058411215	0.021616541	0.004672897	0.014097744	0.039719626	0.068609023	0.028037383	0.045112782	0.077102804	0.071428571	0.063084112	0.085526316	0.037383178	0.036654135	0.051401869	0.057330827	0.039719626	0.051691729	0.014018692	0.002819549	0.03271028	0.021616541	0.011682243	0.014097744	0.11682243
YCL011C_YML014W	0	0	3	13	1	0	103358	243225	102075	244064	427	279	6.16	8.51	48.728	32.438	0.102803738	0.064285714	0.044392523	0.053571429	0.053738318	0.060714286	0.021028037	0.014285714	0.058411215	0.021428571	0.004672897	0.025	0.039719626	0.075	0.028037383	0.064285714	0.077102804	0.092857143	0.063084112	0.060714286	0.037383178	0.057142857	0.051401869	0.067857143	0.039719626	0.053571429	0.014018692	0.014285714	0.03271028	0.046428571	0.011682243	0.032142857	0.11682243
YCL011C_YML030W	0	0	3	13	1	0	103358	216435	102075	216914	427	159	6.16	9.83	48.728	18.477	0.102803738	0.05625	0.044392523	0.08125	0.053738318	0.11875	0.021028037	0.03125	0.058411215	0.025	0.004672897	0.01875	0.039719626	0.1125	0.028037383	0.0375	0.077102804	0.13125	0.063084112	0.0375	0.037383178	0.01875	0.051401869	0.04375	0.039719626	0.04375	0.014018692	0.0125	0.03271028	0.025	0.011682243	0.00625	0.11682243
YCL011C_YML034C-A	NA	NA	NA	NA	NA	NA	NA	NA	NA	NA	NA	NA	NA	NA	NA	NA	NA	NA	NA	NA	NA	NA	NA	NA	NA	NA	NA	NA	NA	NA	NA	NA	NA	NA	NA	NA	NA	NA	NA	NA	NA	NA	NA	NA	NA	NA	NA	NA	NA
YCL011C_YML057C-A	NA	NA	NA	NA	NA	NA	NA	NA	NA	NA	NA	NA	NA	NA	NA	NA	NA	NA	NA	NA	NA	NA	NA	NA	NA	NA	NA	NA	NA	NA	NA	NA	NA	NA	NA	NA	NA	NA	NA	NA	NA	NA	NA	NA	NA	NA	NA	NA	NA
YCL011C_YML062C	0	0	3	13	1	1	103358	148683	102075	147505	427	392	6.16	4.26	48.728	44.996	0.102803738	0.045801527	0.044392523	0.027989822	0.053738318	0.086513995	0.021028037	0.010178117	0.058411215	0.020356234	0.004672897	0.007633588	0.039719626	0.094147583	0.028037383	0.040712468	0.077102804	0.152671756	0.063084112	0.094147583	0.037383178	0.015267176	0.051401869	0.061068702	0.039719626	0.055979644	0.014018692	0.002544529	0.03271028	0.022900763	0.011682243	0.012722646	0.11682243
YCL011C_YML069W	0	0	3	13	1	0	103358	135500	102075	137158	427	552	6.16	4.57	48.728	62.993	0.102803738	0.057866184	0.044392523	0.056057866	0.053738318	0.075949367	0.021028037	0.014466546	0.058411215	0.048824593	0.004672897	0.007233273	0.039719626	0.068716094	0.028037383	0.054249548	0.077102804	0.099457505	0.063084112	0.075949367	0.037383178	0.032549729	0.051401869	0.061482821	0.039719626	0.050632911	0.014018692	0.005424955	0.03271028	0.036166365	0.011682243	0.012658228	0.11682243
YCL011C_YML071C	0	0	3	13	1	1	103358	131572	102075	129749	427	607	6.16	4.46	48.728	69.828	0.102803738	0.019736842	0.044392523	0.039473684	0.053738318	0.103618421	0.021028037	0.016447368	0.058411215	0.026315789	0.004672897	0.001644737	0.039719626	0.090460526	0.028037383	0.024671053	0.077102804	0.131578947	0.063084112	0.080592105	0.037383178	0.021381579	0.051401869	0.057565789	0.039719626	0.069078947	0.014018692	0.009868421	0.03271028	0.024671053	0.011682243	0.009868421	0.11682243
YCL011C_YML074C	0	0	3	13	1	1	103358	121324	102075	120089	427	411	6.16	4.19	48.728	46.553	0.102803738	0.067961165	0.044392523	0.04368932	0.053738318	0.053398058	0.021028037	0.019417476	0.058411215	0.026699029	0.004672897	0.002427184	0.039719626	0.116504854	0.028037383	0.029126214	0.077102804	0.177184466	0.063084112	0.053398058	0.037383178	0.058252427	0.051401869	0.055825243	0.039719626	0.058252427	0.014018692	0	0.03271028	0.024271845	0.011682243	0.007281553	0.11682243
YCL011C_YML093W	0	0	3	13	1	0	103358	83090	102075	85789	427	899	6.16	4.78	48.728	103.023	0.102803738	0.042222222	0.044392523	0.058888889	0.053738318	0.065555556	0.021028037	0.028888889	0.058411215	0.02	0.004672897	0.007777778	0.039719626	0.11	0.028037383	0.044444444	0.077102804	0.125555556	0.063084112	0.082222222	0.037383178	0.027777778	0.051401869	0.043333333	0.039719626	0.042222222	0.014018692	0	0.03271028	0.013333333	0.011682243	0.012222222	0.11682243
YCL011C_YML098W	0	0	3	13	1	0	103358	77267	102075	77770	427	167	6.16	5.57	48.728	19.132	0.102803738	0.035714286	0.044392523	0.071428571	0.053738318	0.095238095	0.021028037	0.011904762	0.058411215	0.029761905	0.004672897	0	0.039719626	0.125	0.028037383	0.06547619	0.077102804	0.101190476	0.063084112	0.053571429	0.037383178	0.023809524	0.051401869	0.041666667	0.039719626	0.023809524	0.014018692	0.011904762	0.03271028	0.023809524	0.011682243	0.005952381	0.11682243
YCL011C_YML102W	0	0	3	13	1	0	103358	68294	102075	69700	427	468	6.16	6.3	48.728	51.252	0.102803738	0.074626866	0.044392523	0.076759062	0.053738318	0.085287846	0.021028037	0.014925373	0.058411215	0.031982942	0.004672897	0.017057569	0.039719626	0.053304904	0.028037383	0.034115139	0.077102804	0.049040512	0.063084112	0.087420043	0.037383178	0.051172708	0.051401869	0.089552239	0.039719626	0.053304904	0.014018692	0.021321962	0.03271028	0.029850746	0.011682243	0.023454158	0.11682243
YCL011C_YML115C	0	0	3	13	1	1	103358	41794	102075	40187	427	535	6.16	5.13	48.728	61.091	0.102803738	0.063432836	0.044392523	0.054104478	0.053738318	0.095149254	0.021028037	0.024253731	0.058411215	0.046641791	0.004672897	0.013059701	0.039719626	0.057835821	0.028037383	0.039179104	0.077102804	0.067164179	0.063084112	0.080223881	0.037383178	0.042910448	0.051401869	0.054104478	0.039719626	0.061567164	0.014018692	0.005597015	0.03271028	0.048507463	0.011682243	0.026119403	0.11682243
YCL011C_YML117W	0	0	3	13	1	0	103358	34243	102075	37647	427	1134	6.16	6.99	48.728	126.138	0.102803738	0.056387665	0.044392523	0.052863436	0.053738318	0.07753304	0.021028037	0.023788546	0.058411215	0.036123348	0.004672897	0.001762115	0.039719626	0.059911894	0.028037383	0.032599119	0.077102804	0.060792952	0.063084112	0.118061674	0.037383178	0.04845815	0.051401869	0.049339207	0.039719626	0.059911894	0.014018692	0.00969163	0.03271028	0.040528634	0.011682243	0.022907489	0.11682243
YCL011C_YML124C	0	0	3	13	1	1	103358	23684	102075	22049	427	445	6.16	4.92	48.728	49.694	0.102803738	0.080717489	0.044392523	0.067264574	0.053738318	0.078475336	0.021028037	0.020179372	0.058411215	0.044843049	0.004672897	0.00896861	0.039719626	0.051569507	0.028037383	0.029147982	0.077102804	0.089686099	0.063084112	0.062780269	0.037383178	0.040358744	0.051401869	0.076233184	0.039719626	0.051569507	0.014018692	0.024663677	0.03271028	0.042600897	0.011682243	0.024663677	0.11682243
YCL011C_YMR014W	0	0	3	13	1	0	103358	298867	102075	300426	427	519	6.16	9.51	48.728	60.054	0.102803738	0.042307692	0.044392523	0.055769231	0.053738318	0.075	0.021028037	0.015384615	0.058411215	0.017307692	0.004672897	0.009615385	0.039719626	0.140384615	0.028037383	0.040384615	0.077102804	0.111538462	0.063084112	0.090384615	0.037383178	0.025	0.051401869	0.017307692	0.039719626	0.055769231	0.014018692	0.007692308	0.03271028	0.038461538	0.011682243	0.015384615	0.11682243
YCL011C_YMR031C	0	0	3	13	1	1	103358	334742	102075	332211	427	843	6.16	6.28	48.728	93.344	0.102803738	0.046208531	0.044392523	0.091232227	0.053738318	0.072274882	0.021028037	0.022511848	0.058411215	0.015402844	0.004672897	0.003554502	0.039719626	0.119668246	0.028037383	0.045023697	0.077102804	0.110189573	0.063084112	0.106635071	0.037383178	0.021327014	0.051401869	0.046208531	0.039719626	0.049763033	0.014018692	0.002369668	0.03271028	0.017772512	0.011682243	0.018957346	0.11682243
YCL011C_YMR039C	0	0	3	13	1	1	103358	349521	102075	348643	427	292	6.16	5.4	48.728	33.102	0.102803738	0.04778157	0.044392523	0.075085324	0.053738318	0.068259386	0.021028037	0.017064846	0.058411215	0.010238908	0.004672897	0	0.039719626	0.122866894	0.028037383	0.030716724	0.077102804	0.129692833	0.063084112	0.081911263	0.037383178	0.04778157	0.051401869	0.020477816	0.039719626	0.044368601	0.014018692	0	0.03271028	0.023890785	0.011682243	0.010238908	0.11682243
YCL011C_YMR044W	0	0	3	13	1	0	103358	355383	102075	356810	427	475	6.16	5.05	48.728	55.426	0.102803738	0.033613445	0.044392523	0.046218487	0.053738318	0.06092437	0.021028037	0.021008403	0.058411215	0.037815126	0.004672897	0.016806723	0.039719626	0.12394958	0.028037383	0.037815126	0.077102804	0.132352941	0.063084112	0.071428571	0.037383178	0.048319328	0.051401869	0.044117647	0.039719626	0.073529412	0.014018692	0.010504202	0.03271028	0.021008403	0.011682243	0.008403361	0.11682243
YCL011C_YMR188C	0	0	3	13	1	1	103358	637003	102075	636290	427	237	6.16	10.38	48.728	27.635	0.102803738	0.037815126	0.044392523	0.042016807	0.053738318	0.12605042	0.021028037	0.021008403	0.058411215	0.037815126	0.004672897	0	0.039719626	0.109243697	0.028037383	0.079831933	0.077102804	0.088235294	0.063084112	0.06302521	0.037383178	0.016806723	0.051401869	0.058823529	0.039719626	0.058823529	0.014018692	0.004201681	0.03271028	0.012605042	0.011682243	0.016806723	0.11682243
YCL011C_YMR201C	0	0	3	13	1	1	103358	667043	102075	665844	427	371	6.16	7.31	48.728	43.038	0.102803738	0.051075269	0.044392523	0.056451613	0.053738318	0.075268817	0.021028037	0.016129032	0.058411215	0.032258065	0.004672897	0.008064516	0.039719626	0.099462366	0.028037383	0.043010753	0.077102804	0.10483871	0.063084112	0.048387097	0.037383178	0.051075269	0.051401869	0.032258065	0.039719626	0.045698925	0.014018692	0.021505376	0.03271028	0.02688172	0.011682243	0.034946237	0.11682243
YCL011C_YMR214W	0	0	3	13	1	0	103358	695349	102075	696482	427	377	6.16	7.41	48.728	41.543	0.102803738	0.132275132	0.044392523	0.052910053	0.053738318	0.071428571	0.021028037	0.029100529	0.058411215	0.042328042	0.004672897	0.002645503	0.039719626	0.08994709	0.028037383	0.052910053	0.077102804	0.066137566	0.063084112	0.042328042	0.037383178	0.047619048	0.051401869	0.058201058	0.039719626	0.055555556	0.014018692	0.021164021	0.03271028	0.03968254	0.011682243	0.023809524	0.11682243
YCL011C_YMR227C	0	0	3	13	1	1	103358	724384	102075	722612	427	590	6.16	4.31	48.728	67.555	0.102803738	0.052453469	0.044392523	0.054145516	0.053738318	0.086294416	0.021028037	0.016920474	0.058411215	0.015228426	0.004672897	0.005076142	0.039719626	0.104906937	0.028037383	0.037225042	0.077102804	0.179357022	0.063084112	0.047377327	0.037383178	0.040609137	0.051401869	0.054145516	0.039719626	0.054145516	0.014018692	0.001692047	0.03271028	0.016920474	0.011682243	0.021996616	0.11682243
YCL011C_YMR241W	0	0	3	13	1	0	103358	751960	102075	752904	427	314	6.16	10.68	48.728	34.184	0.102803738	0.114285714	0.044392523	0.073015873	0.053738318	0.076190476	0.021028037	0.028571429	0.058411215	0.044444444	0.004672897	0.022222222	0.039719626	0.079365079	0.028037383	0.028571429	0.077102804	0.050793651	0.063084112	0.066666667	0.037383178	0.034920635	0.051401869	0.079365079	0.039719626	0.06031746	0.014018692	0.00952381	0.03271028	0.025396825	0.011682243	0.00952381	0.11682243
YCL011C_YMR244C-A	0	0	3	13	1	1	103358	758830	102075	758516	427	104	6.16	9.31	48.728	12.445	0.102803738	0.028571429	0.044392523	0.047619048	0.053738318	0.038095238	0.021028037	0.019047619	0.058411215	0.066666667	0.004672897	0.019047619	0.039719626	0.142857143	0.028037383	0.066666667	0.077102804	0.104761905	0.063084112	0.076190476	0.037383178	0.028571429	0.051401869	0.019047619	0.039719626	0.057142857	0.014018692	0.038095238	0.03271028	0.00952381	0.011682243	0.019047619	0.11682243
YCL011C_YMR260C	0	0	3	13	1	1	103358	789838	102075	789377	427	153	6.16	4.53	48.728	17.435	0.102803738	0.11038961	0.044392523	0.038961039	0.053738318	0.058441558	0.021028037	0.025974026	0.058411215	0.038961039	0.004672897	0.006493506	0.039719626	0.103896104	0.028037383	0.038961039	0.077102804	0.116883117	0.063084112	0.025974026	0.037383178	0.012987013	0.051401869	0.038961039	0.039719626	0.051948052	0.014018692	0.012987013	0.03271028	0.019480519	0.011682243	0.012987013	0.11682243
YCL011C_YMR263W	0	0	3	13	1	0	103358	794918	102075	795523	427	201	6.16	10.53	48.728	23.026	0.102803738	0.069306931	0.044392523	0.03960396	0.053738318	0.054455446	0.021028037	0.014851485	0.058411215	0.034653465	0.004672897	0	0.039719626	0.079207921	0.028037383	0.054455446	0.077102804	0.03960396	0.063084112	0.059405941	0.037383178	0.03960396	0.051401869	0.024752475	0.039719626	0.034653465	0.014018692	0.00990099	0.03271028	0.03960396	0.011682243	0.03960396	0.11682243
YCL011C_YMR269W	0	0	3	13	1	0	103358	804455	102075	805090	427	211	6.16	10.94	48.728	23.949	0.102803738	0.08490566	0.044392523	0.04245283	0.053738318	0.051886792	0.021028037	0.004716981	0.058411215	0.023584906	0.004672897	0.018867925	0.039719626	0.235849057	0.028037383	0.004716981	0.077102804	0.080188679	0.063084112	0.132075472	0.037383178	0.014150943	0.051401869	0.037735849	0.039719626	0.023584906	0.014018692	0	0.03271028	0.014150943	0.011682243	0.028301887	0.11682243
YCL011C_YNL004W	0	0	3	14	1	0	103358	622917	102075	624623	427	454	6.16	7.61	48.728	52.141	0.102803738	0.087912088	0.044392523	0.041758242	0.053738318	0.046153846	0.021028037	0.010989011	0.058411215	0.035164835	0.004672897	0.002197802	0.039719626	0.041758242	0.028037383	0.010989011	0.077102804	0.063736264	0.063084112	0.085714286	0.037383178	0.028571429	0.051401869	0.061538462	0.039719626	0.03956044	0.014018692	0.008791209	0.03271028	0.050549451	0.011682243	0.024175824	0.11682243
YCL011C_YNL021W	0	0	3	14	1	0	103358	593228	102075	595348	427	706	6.16	5.24	48.728	80.069	0.102803738	0.062234795	0.044392523	0.045261669	0.053738318	0.082036775	0.021028037	0.022630835	0.058411215	0.03960396	0.004672897	0.014144272	0.039719626	0.062234795	0.028037383	0.026874116	0.077102804	0.074964639	0.063084112	0.073550212	0.037383178	0.050919378	0.051401869	0.069306931	0.039719626	0.077793494	0.014018692	0.01980198	0.03271028	0.038189533	0.011682243	0.028288543	0.11682243
YCL011C_YNL027W	0	1	3	14	1	0	103358	579581	102075	581617	427	678	6.16	6.04	48.728	76.3	0.102803738	0.042709867	0.044392523	0.036818851	0.053738318	0.083946981	0.021028037	0.013254786	0.058411215	0.032400589	0.004672897	0.002945508	0.039719626	0.064801178	0.028037383	0.060382916	0.077102804	0.044182622	0.063084112	0.135493373	0.037383178	0.039764359	0.051401869	0.023564065	0.039719626	0.042709867	0.014018692	0.010309278	0.03271028	0.029455081	0.011682243	0.022091311	0.11682243
YCL011C_YNL064C	0	0	3	14	1	1	103358	507098	102075	505869	427	409	6.16	6.23	48.728	44.67	0.102803738	0.12195122	0.044392523	0.073170732	0.053738318	0.048780488	0.021028037	0.014634146	0.058411215	0.046341463	0.004672897	0.002439024	0.039719626	0.1	0.028037383	0.034146341	0.077102804	0.090243902	0.063084112	0.03902439	0.037383178	0.056097561	0.051401869	0.06097561	0.039719626	0.068292683	0.014018692	0.026829268	0.03271028	0.026829268	0.011682243	0.017073171	0.11682243
YCL011C_YNL090W	0	0	3	14	1	0	103358	456567	102075	457145	427	192	6.16	5.24	48.728	21.479	0.102803738	0.062176166	0.044392523	0.093264249	0.053738318	0.088082902	0.021028037	0.020725389	0.058411215	0.041450777	0.004672897	0.010362694	0.039719626	0.077720207	0.028037383	0.020725389	0.077102804	0.082901554	0.063084112	0.041450777	0.037383178	0.03626943	0.051401869	0.077720207	0.039719626	0.062176166	0.014018692	0.031088083	0.03271028	0.03626943	0.011682243	0.010362694	0.11682243
YCL011C_YNL098C	0	0	3	14	1	1	103358	440572	102075	439604	427	322	6.16	7.35	48.728	34.705	0.102803738	0.086687307	0.044392523	0.080495356	0.053738318	0.055727554	0.021028037	0.021671827	0.058411215	0.012383901	0.004672897	0	0.039719626	0.068111455	0.028037383	0.068111455	0.077102804	0.055727554	0.063084112	0.099071207	0.037383178	0.018575851	0.051401869	0.074303406	0.039719626	0.043343653	0.014018692	0.00619195	0.03271028	0.037151703	0.011682243	0.00619195	0.11682243
YCL011C_YNL148C	0	0	3	14	1	1	103358	350673	102075	349909	427	254	6.16	4.6	48.728	28.353	0.102803738	0.070588235	0.044392523	0.08627451	0.053738318	0.066666667	0.021028037	0.019607843	0.058411215	0.023529412	0.004672897	0.007843137	0.039719626	0.047058824	0.028037383	0.043137255	0.077102804	0.11372549	0.063084112	0.062745098	0.037383178	0.039215686	0.051401869	0.098039216	0.039719626	0.047058824	0.014018692	0.007843137	0.03271028	0.031372549	0.011682243	0.019607843	0.11682243
YCL011C_YNL149C	0	0	3	14	1	1	103358	349758	102075	349369	427	129	6.16	5.51	48.728	15.053	0.102803738	0.038461538	0.044392523	0.092307692	0.053738318	0.1	0.021028037	0.015384615	0.058411215	0.023076923	0.004672897	0.023076923	0.039719626	0.107692308	0.028037383	0.038461538	0.077102804	0.115384615	0.063084112	0.038461538	0.037383178	0.015384615	0.051401869	0.053846154	0.039719626	0.046153846	0.014018692	0	0.03271028	0.023076923	0.011682243	0.007692308	0.11682243
YCL011C_YNL151C	0	0	3	14	1	1	103358	348523	102075	347768	427	251	6.16	4.08	48.728	27.724	0.102803738	0.107142857	0.044392523	0.047619048	0.053738318	0.071428571	0.021028037	0.01984127	0.058411215	0.03968254	0.004672897	0	0.039719626	0.083333333	0.028037383	0.011904762	0.077102804	0.083333333	0.063084112	0.067460317	0.037383178	0.03968254	0.051401869	0.023809524	0.039719626	0.063492063	0.014018692	0	0.03271028	0.047619048	0.011682243	0.007936508	0.11682243
YCL011C_YNL162W-A	0	0	3	14	1	0	103358	330331	102075	330549	427	72	6.16	8.03	48.728	8.264	0.102803738	0.01369863	0.044392523	0.02739726	0.053738318	0.095890411	0.021028037	0.01369863	0.058411215	0.02739726	0.004672897	0	0.039719626	0.082191781	0.028037383	0.068493151	0.077102804	0.04109589	0.063084112	0.082191781	0.037383178	0.068493151	0.051401869	0.095890411	0.039719626	0.04109589	0.014018692	0.068493151	0.03271028	0.04109589	0.011682243	0	0.11682243
YCL011C_YNL169C	0	0	3	14	1	1	103358	317673	102075	316171	427	500	6.16	9.84	48.728	56.594	0.102803738	0.071856287	0.044392523	0.0499002	0.053738318	0.095808383	0.021028037	0.027944112	0.058411215	0.065868263	0.004672897	0.015968064	0.039719626	0.063872255	0.028037383	0.033932136	0.077102804	0.05988024	0.063084112	0.085828343	0.037383178	0.043912176	0.051401869	0.073852295	0.039719626	0.041916168	0.014018692	0.00998004	0.03271028	0.025948104	0.011682243	0.023952096	0.11682243
YCL011C_YNL206C	0	0	3	14	1	1	103358	258156	102075	256789	427	455	6.16	4.24	48.728	51.621	0.102803738	0.048245614	0.044392523	0.037280702	0.053738318	0.096491228	0.021028037	0.01754386	0.058411215	0.048245614	0.004672897	0	0.039719626	0.087719298	0.028037383	0.037280702	0.077102804	0.111842105	0.063084112	0.094298246	0.037383178	0.035087719	0.051401869	0.043859649	0.039719626	0.057017544	0.014018692	0.006578947	0.03271028	0.030701754	0.011682243	0.00877193	0.11682243
YCL011C_YNL215W	0	0	3	14	1	0	103358	244469	102075	245431	427	320	6.16	4.43	48.728	36.154	0.102803738	0.068535826	0.044392523	0.040498442	0.053738318	0.065420561	0.021028037	0.012461059	0.058411215	0.009345794	0.004672897	0	0.039719626	0.090342679	0.028037383	0.021806854	0.077102804	0.15576324	0.063084112	0.109034268	0.037383178	0.018691589	0.051401869	0.046728972	0.039719626	0.037383178	0.014018692	0.003115265	0.03271028	0.024922118	0.011682243	0.009345794	0.11682243
YCL011C_YNL229C	0	0	3	14	1	1	103358	220202	102075	219138	427	354	6.16	6.45	48.728	40.271	0.102803738	0.053521127	0.044392523	0.070422535	0.053738318	0.073239437	0.021028037	0.028169014	0.058411215	0.053521127	0.004672897	0.016901408	0.039719626	0.030985915	0.028037383	0.050704225	0.077102804	0.05915493	0.063084112	0.076056338	0.037383178	0.033802817	0.051401869	0.067605634	0.039719626	0.050704225	0.014018692	0	0.03271028	0.030985915	0.011682243	0.030985915	0.11682243
YCL011C_YNL246W	0	0	3	14	1	0	103358	185461	102075	186350	427	264	6.16	4.47	48.728	30.615	0.102803738	0.060377358	0.044392523	0.049056604	0.053738318	0.064150943	0.021028037	0.018867925	0.058411215	0.052830189	0.004672897	0.018867925	0.039719626	0.098113208	0.028037383	0.033962264	0.077102804	0.124528302	0.063084112	0.075471698	0.037383178	0.041509434	0.051401869	0.045283019	0.039719626	0.064150943	0.014018692	0.00754717	0.03271028	0.041509434	0.011682243	0.018867925	0.11682243
YCL011C_YNL292W	0	0	3	14	1	0	103358	82806	102075	84017	427	403	6.16	6.55	48.728	45.273	0.102803738	0.056930693	0.044392523	0.061881188	0.053738318	0.089108911	0.021028037	0.017326733	0.058411215	0.02970297	0.004672897	0.004950495	0.039719626	0.108910891	0.028037383	0.04950495	0.077102804	0.101485149	0.063084112	0.076732673	0.037383178	0.037128713	0.051401869	0.076732673	0.039719626	0.047029703	0.014018692	0.004950495	0.03271028	0.02970297	0.011682243	0.01980198	0.11682243
YCL011C_YNL306W	0	0	3	14	1	0	103358	58155	102075	58808	427	217	6.16	10.71	48.728	24.563	0.102803738	0.073394495	0.044392523	0.041284404	0.053738318	0.073394495	0.021028037	0.027522936	0.058411215	0.055045872	0.004672897	0.013761468	0.039719626	0.114678899	0.028037383	0.02293578	0.077102804	0.050458716	0.063084112	0.091743119	0.037383178	0.032110092	0.051401869	0.082568807	0.039719626	0.04587156	0.014018692	0.009174312	0.03271028	0.032110092	0.011682243	0.013761468	0.11682243
YCL011C_YNL308C	0	0	3	14	1	1	103358	55896	102075	54121	427	591	6.16	4.86	48.728	68.653	0.102803738	0.035472973	0.044392523	0.077702703	0.053738318	0.0625	0.021028037	0.008445946	0.058411215	0.033783784	0.004672897	0.006756757	0.039719626	0.14527027	0.028037383	0.033783784	0.077102804	0.172297297	0.063084112	0.050675676	0.037383178	0.030405405	0.051401869	0.037162162	0.039719626	0.038851351	0.014018692	0	0.03271028	0.021959459	0.011682243	0.013513514	0.11682243
YCL011C_YNR007C	0	0	3	14	1	1	103358	640116	102075	639184	427	310	6.16	4.37	48.728	35.887	0.102803738	0.048231511	0.044392523	0.035369775	0.053738318	0.067524116	0.021028037	0.028938907	0.058411215	0.038585209	0.004672897	0.01607717	0.039719626	0.064308682	0.028037383	0.045016077	0.077102804	0.096463023	0.063084112	0.073954984	0.037383178	0.041800643	0.051401869	0.061093248	0.039719626	0.07073955	0.014018692	0.012861736	0.03271028	0.045016077	0.011682243	0.019292605	0.11682243
YCL011C_YNR024W	0	0	3	14	1	0	103358	672411	102075	672971	427	186	6.16	10.09	48.728	21.142	0.102803738	0.080213904	0.044392523	0.016042781	0.053738318	0.048128342	0.021028037	0.021390374	0.058411215	0.037433155	0.004672897	0.005347594	0.039719626	0.176470588	0.028037383	0.016042781	0.077102804	0.07486631	0.063084112	0.106951872	0.037383178	0.021390374	0.051401869	0.042780749	0.039719626	0.037433155	0.014018692	0	0.03271028	0.021390374	0.011682243	0.005347594	0.11682243
YCL011C_YNR036C	0	0	3	14	1	1	103358	694824	102075	694363	427	153	6.16	11.8	48.728	16.917	0.102803738	0.084415584	0.044392523	0.058441558	0.053738318	0.064935065	0.021028037	0.025974026	0.058411215	0.012987013	0.004672897	0.006493506	0.039719626	0.084415584	0.028037383	0.064935065	0.077102804	0.012987013	0.063084112	0.097402597	0.037383178	0.064935065	0.051401869	0.084415584	0.039719626	0.038961039	0.014018692	0.025974026	0.03271028	0.025974026	0.011682243	0.019480519	0.11682243
YCL011C_YOL010W	0	0	3	15	1	0	103358	307939	102075	309042	427	367	6.16	9.41	48.728	40.17	0.102803738	0.089673913	0.044392523	0.059782609	0.053738318	0.078804348	0.021028037	0.02173913	0.058411215	0.035326087	0.004672897	0.010869565	0.039719626	0.078804348	0.028037383	0.024456522	0.077102804	0.065217391	0.063084112	0.08423913	0.037383178	0.048913043	0.051401869	0.070652174	0.039719626	0.108695652	0.014018692	0.010869565	0.03271028	0.024456522	0.011682243	0.013586957	0.11682243
YCL011C_YOL016C	0	0	3	15	1	1	103358	296121	102075	294778	427	447	6.16	5.92	48.728	50.447	0.102803738	0.060267857	0.044392523	0.053571429	0.053738318	0.104910714	0.021028037	0.015625	0.058411215	0.035714286	0.004672897	0.008928571	0.039719626	0.089285714	0.028037383	0.033482143	0.077102804	0.080357143	0.063084112	0.071428571	0.037383178	0.035714286	0.051401869	0.073660714	0.039719626	0.064732143	0.014018692	0.006696429	0.03271028	0.029017857	0.011682243	0.022321429	0.11682243
YCL011C_YOL038W	0	0	3	15	1	0	103358	255336	102075	256100	427	254	6.16	7.37	48.728	28.439	0.102803738	0.058823529	0.044392523	0.050980392	0.053738318	0.070588235	0.021028037	0.003921569	0.058411215	0.023529412	0.004672897	0.003921569	0.039719626	0.074509804	0.028037383	0.062745098	0.077102804	0.08627451	0.063084112	0.090196078	0.037383178	0.039215686	0.051401869	0.101960784	0.039719626	0.054901961	0.014018692	0.015686275	0.03271028	0.035294118	0.011682243	0.015686275	0.11682243
YCL011C_YOL064C	0	0	3	15	1	1	103358	207176	102075	206103	427	357	6.16	6.14	48.728	39.149	0.102803738	0.081005587	0.044392523	0.072625698	0.053738318	0.097765363	0.021028037	0.008379888	0.058411215	0.036312849	0.004672897	0.008379888	0.039719626	0.069832402	0.028037383	0.033519553	0.077102804	0.053072626	0.063084112	0.083798883	0.037383178	0.025139665	0.051401869	0.069832402	0.039719626	0.069832402	0.014018692	0.016759777	0.03271028	0.027932961	0.011682243	0.030726257	0.11682243
YCL011C_YOR054C	0	0	3	15	1	1	103358	429859	102075	427835	427	674	6.16	4.32	48.728	73.649	0.102803738	0.062222222	0.044392523	0.051851852	0.053738318	0.059259259	0.021028037	0.025185185	0.058411215	0.028148148	0.004672897	0.008888889	0.039719626	0.072592593	0.028037383	0.02962963	0.077102804	0.062222222	0.063084112	0.114074074	0.037383178	0.051851852	0.051401869	0.053333333	0.039719626	0.05037037	0.014018692	0.002962963	0.03271028	0.007407407	0.011682243	0.016296296	0.11682243
YCL011C_YOR074C	0	0	3	15	1	1	103358	467591	102075	466677	427	304	6.16	7.13	48.728	35.047	0.102803738	0.075409836	0.044392523	0.039344262	0.053738318	0.095081967	0.021028037	0.032786885	0.058411215	0.059016393	0.004672897	0.013114754	0.039719626	0.085245902	0.028037383	0.036065574	0.077102804	0.049180328	0.063084112	0.039344262	0.037383178	0.059016393	0.051401869	0.039344262	0.039719626	0.062295082	0.014018692	0.016393443	0.03271028	0.036065574	0.011682243	0.02295082	0.11682243
YCL011C_YOR078W	0	0	3	15	1	0	103358	472727	102075	473371	427	214	6.16	6.56	48.728	24.385	0.102803738	0.027906977	0.044392523	0.055813953	0.053738318	0.079069767	0.021028037	0.004651163	0.058411215	0.013953488	0.004672897	0.004651163	0.039719626	0.130232558	0.028037383	0.060465116	0.077102804	0.111627907	0.063084112	0.120930233	0.037383178	0.018604651	0.051401869	0.055813953	0.039719626	0.037209302	0.014018692	0	0.03271028	0.009302326	0.011682243	0.018604651	0.11682243
YCL011C_YOR086C	0	0	3	15	1	1	103358	486781	102075	483221	427	1186	6.16	7.15	48.728	133.575	0.102803738	0.059814659	0.044392523	0.052232519	0.053738318	0.096040438	0.021028037	0.01600674	0.058411215	0.039595619	0.004672897	0.01432182	0.039719626	0.096882898	0.028037383	0.032013479	0.077102804	0.069924179	0.063084112	0.062342039	0.037383178	0.043807919	0.051401869	0.077506318	0.039719626	0.066554339	0.014018692	0.00589722	0.03271028	0.032013479	0.011682243	0.01095198	0.11682243
YCL011C_YOR097C	0	0	3	15	1	1	103358	507506	102075	506979	427	175	6.16	10.06	48.728	19.4	0.102803738	0.090909091	0.044392523	0.022727273	0.053738318	0.068181818	0.021028037	0.034090909	0.058411215	0.045454545	0.004672897	0.011363636	0.039719626	0.085227273	0.028037383	0.005681818	0.077102804	0.045454545	0.063084112	0.090909091	0.037383178	0.0625	0.051401869	0.073863636	0.039719626	0.090909091	0.014018692	0.017045455	0.03271028	0.034090909	0.011682243	0.011363636	0.11682243
YCL011C_YOR123C	0	0	3	15	1	1	103358	554571	102075	553177	427	464	6.16	4.15	48.728	53.92	0.102803738	0.032258065	0.044392523	0.04516129	0.053738318	0.043010753	0.021028037	0.010752688	0.058411215	0.032258065	0.004672897	0.004301075	0.039719626	0.062365591	0.028037383	0.049462366	0.077102804	0.159139785	0.063084112	0.08172043	0.037383178	0.027956989	0.051401869	0.04516129	0.039719626	0.040860215	0.014018692	0.004301075	0.03271028	0.021505376	0.011682243	0.017204301	0.11682243
YCL011C_YOR130C	0	0	3	15	1	1	103358	570808	102075	569930	427	292	6.16	9.9	48.728	31.579	0.102803738	0.092150171	0.044392523	0.092150171	0.053738318	0.09556314	0.021028037	0.006825939	0.058411215	0.068259386	0.004672897	0.013651877	0.039719626	0.081911263	0.028037383	0.037542662	0.077102804	0.04778157	0.063084112	0.075085324	0.037383178	0.030716724	0.051401869	0.071672355	0.039719626	0.078498294	0.014018692	0.020477816	0.03271028	0.017064846	0.011682243	0.013651877	0.11682243
YCL011C_YOR159C	0	0	3	15	1	1	103358	633567	102075	633283	427	94	6.16	4.82	48.728	10.375	0.102803738	0.073684211	0.044392523	0.042105263	0.053738318	0.063157895	0.021028037	0.031578947	0.058411215	0.052631579	0.004672897	0.010526316	0.039719626	0.094736842	0.028037383	0.042105263	0.077102804	0.063157895	0.063084112	0.031578947	0.037383178	0.052631579	0.051401869	0.094736842	0.039719626	0.126315789	0.014018692	0.010526316	0.03271028	0	0.011682243	0	0.11682243
YCL011C_YOR174W	0	0	3	15	1	0	103358	658748	102075	659602	427	284	6.16	4.36	48.728	32.205	0.102803738	0.031578947	0.044392523	0.059649123	0.053738318	0.105263158	0.021028037	0.021052632	0.058411215	0.038596491	0.004672897	0.003508772	0.039719626	0.094736842	0.028037383	0.031578947	0.077102804	0.115789474	0.063084112	0.073684211	0.037383178	0.042105263	0.051401869	0.049122807	0.039719626	0.045614035	0.014018692	0.007017544	0.03271028	0.01754386	0.011682243	0.010526316	0.11682243
YCL011C_YOR194C	0	0	3	15	1	1	103358	712544	102075	711684	427	286	6.16	4.11	48.728	32.201	0.102803738	0.045296167	0.044392523	0.045296167	0.053738318	0.06271777	0.021028037	0.006968641	0.058411215	0.020905923	0.004672897	0.013937282	0.039719626	0.076655052	0.028037383	0.038327526	0.077102804	0.132404181	0.063084112	0.059233449	0.037383178	0.020905923	0.051401869	0.069686411	0.039719626	0.06271777	0.014018692	0.006968641	0.03271028	0.013937282	0.011682243	0.003484321	0.11682243
YCL011C_YOR222W	0	0	3	15	1	0	103358	758331	102075	759254	427	307	6.16	10.52	48.728	34.007	0.102803738	0.084415584	0.044392523	0.074675325	0.053738318	0.074675325	0.021028037	0.045454545	0.058411215	0.048701299	0.004672897	0.00974026	0.039719626	0.087662338	0.028037383	0.032467532	0.077102804	0.038961039	0.063084112	0.064935065	0.037383178	0.042207792	0.051401869	0.084415584	0.039719626	0.064935065	0.014018692	0.016233766	0.03271028	0.042207792	0.011682243	0.003246753	0.11682243
YCL011C_YOR279C	0	0	3	15	1	1	103358	844629	102075	843697	427	310	6.16	9.87	48.728	35.195	0.102803738	0.054662379	0.044392523	0.035369775	0.053738318	0.051446945	0.021028037	0.006430868	0.058411215	0.022508039	0.004672897	0.006430868	0.039719626	0.07073955	0.028037383	0.025723473	0.077102804	0.090032154	0.063084112	0.1414791	0.037383178	0.045016077	0.051401869	0.022508039	0.039719626	0.102893891	0.014018692	0	0.03271028	0.025723473	0.011682243	0.006430868	0.11682243
YCL011C_YOR287C	0	0	3	15	1	1	103358	851838	102075	850936	427	300	6.16	9.42	48.728	36.125	0.102803738	0.026578073	0.044392523	0.019933555	0.053738318	0.069767442	0.021028037	0.026578073	0.058411215	0.043189369	0.004672897	0.003322259	0.039719626	0.15282392	0.028037383	0.046511628	0.077102804	0.132890365	0.063084112	0.079734219	0.037383178	0.026578073	0.051401869	0.033222591	0.039719626	0.03986711	0.014018692	0	0.03271028	0.026578073	0.011682243	0.023255814	0.11682243
YCL011C_YOR309C	NA	NA	NA	NA	NA	NA	NA	NA	NA	NA	NA	NA	NA	NA	NA	NA	NA	NA	NA	NA	NA	NA	NA	NA	NA	NA	NA	NA	NA	NA	NA	NA	NA	NA	NA	NA	NA	NA	NA	NA	NA	NA	NA	NA	NA	NA	NA	NA	NA
YCL011C_YOR310C	0	0	3	15	1	1	103358	898357	102075	896822	427	511	6.16	9.74	48.728	56.956	0.102803738	0.0390625	0.044392523	0.11328125	0.053738318	0.103515625	0.021028037	0.017578125	0.058411215	0.015625	0.004672897	0.00390625	0.039719626	0.150390625	0.028037383	0.01953125	0.077102804	0.1015625	0.063084112	0.0859375	0.037383178	0.015625	0.051401869	0.044921875	0.039719626	0.05859375	0.014018692	0.001953125	0.03271028	0.02734375	0.011682243	0.01171875	0.11682243
YCL011C_YPL009C	0	0	3	16	1	1	103358	538933	102075	535817	427	1038	6.16	5.53	48.728	119.068	0.102803738	0.042348412	0.044392523	0.043310876	0.053738318	0.098171319	0.021028037	0.015399423	0.058411215	0.029836381	0.004672897	0.009624639	0.039719626	0.122232916	0.028037383	0.046198268	0.077102804	0.108758422	0.063084112	0.086621752	0.037383178	0.029836381	0.051401869	0.045235804	0.039719626	0.060635226	0.014018692	0.006737247	0.03271028	0.025024062	0.011682243	0.014436959	0.11682243
YCL011C_YPL012W	0	0	3	16	1	0	103358	529720	102075	533406	427	1228	6.16	7	48.728	137.507	0.102803738	0.038242474	0.044392523	0.07078926	0.053738318	0.109031733	0.021028037	0.019528072	0.058411215	0.042310822	0.004672897	0.005695688	0.039719626	0.077298617	0.028037383	0.034987795	0.077102804	0.068348251	0.063084112	0.095199349	0.037383178	0.037428804	0.051401869	0.063466233	0.039719626	0.071602929	0.014018692	0.012205045	0.03271028	0.025223759	0.011682243	0.015459723	0.11682243
YCL011C_YPL013C	0	0	3	16	1	1	103358	529347	102075	528982	427	121	6.16	11.18	48.728	13.639	0.102803738	0.057377049	0.044392523	0.06557377	0.053738318	0.073770492	0.021028037	0.016393443	0.058411215	0.024590164	0.004672897	0.016393443	0.039719626	0.098360656	0.028037383	0.008196721	0.077102804	0.049180328	0.063084112	0.049180328	0.037383178	0.057377049	0.051401869	0.131147541	0.039719626	0.049180328	0.014018692	0.008196721	0.03271028	0.024590164	0.011682243	0	0.11682243
YCL011C_YPL043W	0	0	3	16	1	0	103358	469936	102075	471993	427	685	6.16	9.81	48.728	77.825	0.102803738	0.055393586	0.044392523	0.072886297	0.053738318	0.059766764	0.021028037	0.023323615	0.058411215	0.034985423	0.004672897	0.004373178	0.039719626	0.128279883	0.028037383	0.023323615	0.077102804	0.094752187	0.063084112	0.055393586	0.037383178	0.034985423	0.051401869	0.069970845	0.039719626	0.040816327	0.014018692	0.008746356	0.03271028	0.017492711	0.011682243	0.013119534	0.11682243
YCL011C_YPL051W	0	0	3	16	1	0	103358	459960	102075	460556	427	198	6.16	6.31	48.728	22.782	0.102803738	0.050251256	0.044392523	0.045226131	0.053738318	0.095477387	0.021028037	0.030150754	0.058411215	0.030150754	0.004672897	0.020100503	0.039719626	0.085427136	0.028037383	0.045226131	0.077102804	0.085427136	0.063084112	0.075376884	0.037383178	0.030150754	0.051401869	0.070351759	0.039719626	0.085427136	0.014018692	0.010050251	0.03271028	0.030150754	0.011682243	0.015075377	0.11682243
YCL011C_YPL081W	0	0	3	16	1	0	103358	404947	102075	406041	427	197	6.16	10.8	48.728	22.443	0.102803738	0.050505051	0.044392523	0.106060606	0.053738318	0.101010101	0.021028037	0.01010101	0.058411215	0.035353535	0.004672897	0	0.039719626	0.090909091	0.028037383	0.025252525	0.077102804	0.080808081	0.063084112	0.060606061	0.037383178	0.045454545	0.051401869	0.060606061	0.039719626	0.045454545	0.014018692	0	0.03271028	0.03030303	0.011682243	0.02020202	0.11682243
YCL011C_YPL138C	0	0	3	16	1	1	103358	292426	102075	291365	427	353	6.16	6.73	48.728	41.468	0.102803738	0.048022599	0.044392523	0.02259887	0.053738318	0.081920904	0.021028037	0.016949153	0.058411215	0.036723164	0.004672897	0.019774011	0.039719626	0.101694915	0.028037383	0.050847458	0.077102804	0.084745763	0.063084112	0.056497175	0.037383178	0.031073446	0.051401869	0.053672316	0.039719626	0.056497175	0.014018692	0.050847458	0.03271028	0.036723164	0.011682243	0.025423729	0.11682243
YCL011C_YPL146C	0	0	3	16	1	1	103358	277528	102075	276161	427	455	6.16	10.14	48.728	52.555	0.102803738	0.037280702	0.044392523	0.039473684	0.053738318	0.081140351	0.021028037	0.00877193	0.058411215	0.00877193	0.004672897	0.010964912	0.039719626	0.175438596	0.028037383	0.032894737	0.077102804	0.127192982	0.063084112	0.087719298	0.037383178	0.026315789	0.051401869	0.050438596	0.039719626	0.059210526	0.014018692	0.002192982	0.03271028	0.019736842	0.011682243	0.026315789	0.11682243
YCL011C_YPL181W	0	0	3	16	1	0	103358	203420	102075	204940	427	506	6.16	4.63	48.728	57.052	0.102803738	0.045364892	0.044392523	0.061143984	0.053738318	0.045364892	0.021028037	0.023668639	0.058411215	0.015779093	0.004672897	0.007889546	0.039719626	0.063116371	0.028037383	0.049309665	0.077102804	0.112426036	0.063084112	0.114398422	0.037383178	0.037475345	0.051401869	0.045364892	0.039719626	0.035502959	0.014018692	0.013806706	0.03271028	0.019723866	0.011682243	0.01183432	0.11682243
YCL011C_YPL196W	0	0	3	16	1	0	103358	175042	102075	175863	427	273	6.16	5.52	48.728	30.779	0.102803738	0.087591241	0.044392523	0.03649635	0.053738318	0.083941606	0.021028037	0.01459854	0.058411215	0.040145985	0.004672897	0.01459854	0.039719626	0.069343066	0.028037383	0.02189781	0.077102804	0.098540146	0.063084112	0.094890511	0.037383178	0.04379562	0.051401869	0.054744526	0.039719626	0.040145985	0.014018692	0.018248175	0.03271028	0.047445255	0.011682243	0.025547445	0.11682243
YCL011C_YPL213W	0	0	3	16	1	0	103358	150613	102075	151329	427	238	6.16	7.64	48.728	27.193	0.102803738	0.037656904	0.044392523	0.041841004	0.053738318	0.142259414	0.021028037	0.033472803	0.058411215	0.020920502	0.004672897	0	0.039719626	0.050209205	0.028037383	0.033472803	0.077102804	0.062761506	0.063084112	0.058577406	0.037383178	0.041841004	0.051401869	0.066945607	0.039719626	0.054393305	0.014018692	0.008368201	0.03271028	0.016736402	0.011682243	0.029288703	0.11682243
YCL011C_YPL217C	0	0	3	16	1	1	103358	143170	102075	139619	427	1183	6.16	6.79	48.728	135.57	0.102803738	0.063344595	0.044392523	0.058277027	0.053738318	0.069256757	0.021028037	0.027871622	0.058411215	0.044763514	0.004672897	0.009290541	0.039719626	0.103885135	0.028037383	0.034628378	0.077102804	0.099662162	0.063084112	0.052364865	0.037383178	0.045608108	0.051401869	0.05152027	0.039719626	0.053209459	0.014018692	0.005067568	0.03271028	0.024493243	0.011682243	0.019425676	0.11682243
YCL011C_YPL235W	0	0	3	16	1	0	103358	103232	102075	104647	427	471	6.16	5.06	48.728	51.611	0.102803738	0.072033898	0.044392523	0.072033898	0.053738318	0.086864407	0.021028037	0.025423729	0.058411215	0.025423729	0.004672897	0.002118644	0.039719626	0.06779661	0.028037383	0.044491525	0.077102804	0.084745763	0.063084112	0.082627119	0.037383178	0.025423729	0.051401869	0.06779661	0.039719626	0.084745763	0.014018692	0.004237288	0.03271028	0.016949153	0.011682243	0.014830508	0.11682243
YCL011C_YPR034W	0	0	3	16	1	0	103358	639522	102075	640955	427	477	6.16	5.23	48.728	53.81	0.102803738	0.054393305	0.044392523	0.064853556	0.053738318	0.094142259	0.021028037	0.033472803	0.058411215	0.037656904	0.004672897	0.014644351	0.039719626	0.071129707	0.028037383	0.058577406	0.077102804	0.066945607	0.063084112	0.075313808	0.037383178	0.043933054	0.051401869	0.054393305	0.039719626	0.062761506	0.014018692	0.008368201	0.03271028	0.039748954	0.011682243	0.008368201	0.11682243
YCL011C_YPR037C	0	0	3	16	1	1	103358	647035	102075	646445	427	196	6.16	7.42	48.728	22.141	0.102803738	0.065989848	0.044392523	0.086294416	0.053738318	0.076142132	0.021028037	0.025380711	0.058411215	0.030456853	0.004672897	0.015228426	0.039719626	0.101522843	0.028037383	0.025380711	0.077102804	0.086294416	0.063084112	0.060913706	0.037383178	0.035532995	0.051401869	0.045685279	0.039719626	0.076142132	0.014018692	0.030456853	0.03271028	0.040609137	0.011682243	0.035532995	0.11682243
YCL011C_YPR051W	0	0	3	16	1	0	103358	664957	102075	665487	427	176	6.16	7.37	48.728	20.457	0.102803738	0.056497175	0.044392523	0.056497175	0.053738318	0.096045198	0.021028037	0.050847458	0.058411215	0.033898305	0.004672897	0.005649718	0.039719626	0.062146893	0.028037383	0.016949153	0.077102804	0.084745763	0.063084112	0.04519774	0.037383178	0.039548023	0.051401869	0.04519774	0.039719626	0.09039548	0.014018692	0.02259887	0.03271028	0.062146893	0.011682243	0.02259887	0.11682243
YCL011C_YPR056W	0	0	3	16	1	0	103358	671123	102075	672139	427	338	6.16	9.04	48.728	37.457	0.102803738	0.044247788	0.044392523	0.067846608	0.053738318	0.085545723	0.021028037	0.017699115	0.058411215	0.038348083	0.004672897	0.002949853	0.039719626	0.088495575	0.028037383	0.029498525	0.077102804	0.064896755	0.063084112	0.097345133	0.037383178	0.044247788	0.051401869	0.076696165	0.039719626	0.08259587	0.014018692	0.026548673	0.03271028	0.029498525	0.011682243	0.014749263	0.11682243
YCL011C_YPR062W	0	0	3	16	1	0	103358	677162	102075	677638	427	158	6.16	5.79	48.728	17.507	0.102803738	0.132075472	0.044392523	0.037735849	0.053738318	0.056603774	0.021028037	0.044025157	0.058411215	0.025157233	0.004672897	0.012578616	0.039719626	0.081761006	0.028037383	0.031446541	0.077102804	0.081761006	0.063084112	0.037735849	0.037383178	0.025157233	0.051401869	0.06918239	0.039719626	0.062893082	0.014018692	0.037735849	0.03271028	0.037735849	0.011682243	0.018867925	0.11682243
YCL011C_YPR143W	0	0	3	16	1	0	103358	818319	102075	819071	427	250	6.16	5.54	48.728	28.212	0.102803738	0.039840637	0.044392523	0.083665339	0.053738318	0.067729084	0.021028037	0.011952191	0.058411215	0.019920319	0.004672897	0	0.039719626	0.163346614	0.028037383	0.023904382	0.077102804	0.143426295	0.063084112	0.091633466	0.037383178	0.015936255	0.051401869	0.035856574	0.039719626	0.051792829	0.014018692	0	0.03271028	0.007968127	0.011682243	0.011952191	0.11682243
YCL011C_YPR157W	0	0	3	16	1	0	103358	841262	102075	842665	427	467	6.16	7.43	48.728	53.809	0.102803738	0.085470085	0.044392523	0.040598291	0.053738318	0.108974359	0.021028037	0.021367521	0.058411215	0.057692308	0.004672897	0.036324786	0.039719626	0.061965812	0.028037383	0.027777778	0.077102804	0.042735043	0.063084112	0.05982906	0.037383178	0.064102564	0.051401869	0.044871795	0.039719626	0.047008547	0.014018692	0.014957265	0.03271028	0.038461538	0.011682243	0.038461538	0.11682243
YCL011C_YPR163C	0	0	3	16	1	1	103358	869951	102075	868641	427	436	6.16	5	48.728	48.522	0.102803738	0.080091533	0.044392523	0.086956522	0.053738318	0.04805492	0.021028037	0.004576659	0.058411215	0.029748284	0.004672897	0.025171625	0.039719626	0.061784897	0.028037383	0.032036613	0.077102804	0.091533181	0.063084112	0.077803204	0.037383178	0.068649886	0.051401869	0.059496568	0.039719626	0.027459954	0.014018692	0	0.03271028	0.011441648	0.011682243	0.00228833	0.11682243
YCL011C_YPR173C	0	0	3	16	1	1	103358	887833	102075	886520	427	437	6.16	4.96	48.728	48.172	0.102803738	0.077625571	0.044392523	0.082191781	0.053738318	0.093607306	0.021028037	0.020547945	0.058411215	0.03196347	0.004672897	0.00913242	0.039719626	0.089041096	0.028037383	0.029680365	0.077102804	0.091324201	0.063084112	0.073059361	0.037383178	0.04109589	0.051401869	0.047945205	0.039719626	0.052511416	0.014018692	0.00456621	0.03271028	0.02739726	0.011682243	0.006849315	0.11682243
YCL011C_YPR174C	0	0	3	16	1	1	103358	888704	102075	888039	427	221	6.16	10.68	48.728	25.411	0.102803738	0.022522523	0.044392523	0.058558559	0.053738318	0.085585586	0.021028037	0.013513514	0.058411215	0.027027027	0.004672897	0.009009009	0.039719626	0.085585586	0.028037383	0.085585586	0.077102804	0.067567568	0.063084112	0.085585586	0.037383178	0.085585586	0.051401869	0.067567568	0.039719626	0.040540541	0.014018692	0.009009009	0.03271028	0.018018018	0.011682243	0.031531532	0.11682243
YLR175W_YAR027W	0	0	12	1	0	0	506136	183764	507587	184471	483	235	9.5	6.1	54.704	27.116	0.059917355	0.029661017	0.055785124	0.055084746	0.090909091	0.105932203	0.020661157	0.021186441	0.010330579	0.059322034	0.012396694	0.016949153	0.134297521	0.063559322	0.026859504	0.021186441	0.099173554	0.080508475	0.074380165	0.063559322	0.035123967	0.055084746	0.07231405	0.059322034	0.047520661	0.105932203	0.018595041	0.016949153	0.02892562	0.042372881	0.016528926	0.033898305	0.055785124
YLR175W_YBL006C	0	0	12	2	0	1	506136	217132	507587	216590	483	180	9.5	9.32	54.704	19.792	0.059917355	0.071823204	0.055785124	0.08839779	0.090909091	0.093922652	0.020661157	0.011049724	0.010330579	0.033149171	0.012396694	0	0.134297521	0.066298343	0.026859504	0.066298343	0.099173554	0.066298343	0.074380165	0.127071823	0.035123967	0.022099448	0.07231405	0.077348066	0.047520661	0.027624309	0.018595041	0.022099448	0.02892562	0.027624309	0.016528926	0.055248619	0.055785124
YLR175W_YBL016W	0	0	12	2	0	0	506136	192454	507587	193515	483	353	9.5	7.11	54.704	40.772	0.059917355	0.039548023	0.055785124	0.056497175	0.090909091	0.098870056	0.020661157	0.025423729	0.010330579	0.050847458	0.012396694	0.008474576	0.134297521	0.062146893	0.026859504	0.033898305	0.099173554	0.06779661	0.074380165	0.059322034	0.035123967	0.06779661	0.07231405	0.042372881	0.047520661	0.09039548	0.018595041	0.016949153	0.02892562	0.039548023	0.016528926	0.033898305	0.055785124
YLR175W_YBR001C	0	0	12	2	0	1	506136	241285	507587	238943	483	780	9.5	6.44	54.704	89.679	0.059917355	0.064020487	0.055785124	0.060179257	0.090909091	0.09475032	0.020661157	0.021766965	0.010330579	0.043533931	0.012396694	0.015364917	0.134297521	0.062740077	0.026859504	0.026888604	0.099173554	0.074263764	0.074380165	0.065300896	0.035123967	0.04993598	0.07231405	0.04865557	0.047520661	0.04993598	0.018595041	0.008962868	0.02892562	0.061459667	0.016528926	0.023047375	0.055785124
YLR175W_YBR046C	0	0	12	2	0	1	506136	331509	507587	330505	483	334	9.5	9.46	54.704	37.018	0.059917355	0.080597015	0.055785124	0.074626866	0.090909091	0.095522388	0.020661157	0.008955224	0.010330579	0.03880597	0.012396694	0.002985075	0.134297521	0.101492537	0.026859504	0.029850746	0.099173554	0.068656716	0.074380165	0.068656716	0.035123967	0.041791045	0.07231405	0.074626866	0.047520661	0.074626866	0.018595041	0.005970149	0.02892562	0.065671642	0.016528926	0.005970149	0.055785124
YLR175W_YBR056W-A	NA	NA	NA	NA	NA	NA	NA	NA	NA	NA	NA	NA	NA	NA	NA	NA	NA	NA	NA	NA	NA	NA	NA	NA	NA	NA	NA	NA	NA	NA	NA	NA	NA	NA	NA	NA	NA	NA	NA	NA	NA	NA	NA	NA	NA	NA	NA	NA	NA
YLR175W_YBR077C	0	0	12	2	0	1	506136	392287	507587	391799	483	162	9.5	4.77	54.704	18.354	0.059917355	0.042944785	0.055785124	0.030674847	0.090909091	0.116564417	0.020661157	0.042944785	0.010330579	0.036809816	0.012396694	0.006134969	0.134297521	0.073619632	0.026859504	0.018404908	0.099173554	0.073619632	0.074380165	0.104294479	0.035123967	0.030674847	0.07231405	0.049079755	0.047520661	0.073619632	0.018595041	0.012269939	0.02892562	0.042944785	0.016528926	0.024539877	0.055785124
YLR175W_YBR135W	0	0	12	2	0	0	506136	504848	507587	505300	483	150	9.5	6.42	54.704	17.795	0.059917355	0.033112583	0.055785124	0.066225166	0.090909091	0.079470199	0.020661157	0.026490066	0.010330579	0.026490066	0.012396694	0.013245033	0.134297521	0.026490066	0.026859504	0.158940397	0.099173554	0.072847682	0.074380165	0.059602649	0.035123967	0.052980132	0.07231405	0.033112583	0.047520661	0.046357616	0.018595041	0.006622517	0.02892562	0.059602649	0.016528926	0.059602649	0.055785124
YLR175W_YBR197C	0	0	12	2	0	1	506136	615851	507587	615198	483	217	9.5	9.82	54.704	24.203	0.059917355	0.036697248	0.055785124	0.055045872	0.090909091	0.073394495	0.020661157	0.027522936	0.010330579	0.009174312	0.012396694	0.004587156	0.134297521	0.087155963	0.026859504	0.055045872	0.099173554	0.050458716	0.074380165	0.110091743	0.035123967	0.064220183	0.07231405	0.064220183	0.047520661	0.032110092	0.018595041	0.004587156	0.02892562	0.013761468	0.016528926	0.027522936	0.055785124
YLR175W_YCL002C	0	0	12	3	0	1	506136	111674	507587	110843	483	251	9.5	9.13	54.704	29.018	0.059917355	0.051587302	0.055785124	0.031746032	0.090909091	0.146825397	0.020661157	0.027777778	0.010330579	0.083333333	0.012396694	0.015873016	0.134297521	0.043650794	0.026859504	0.031746032	0.099173554	0.015873016	0.074380165	0.103174603	0.035123967	0.031746032	0.07231405	0.063492063	0.047520661	0.095238095	0.018595041	0.03968254	0.02892562	0.075396825	0.016528926	0.015873016	0.055785124
YLR175W_YCR009C	0	0	12	3	0	1	506136	131540	507587	130743	483	265	9.5	6.57	54.704	30.25	0.059917355	0.04887218	0.055785124	0.078947368	0.090909091	0.105263158	0.020661157	0.011278195	0.010330579	0.037593985	0.012396694	0.003759398	0.134297521	0.101503759	0.026859504	0.060150376	0.099173554	0.071428571	0.074380165	0.052631579	0.035123967	0.026315789	0.07231405	0.052631579	0.047520661	0.060150376	0.018595041	0.011278195	0.02892562	0.045112782	0.016528926	0.007518797	0.055785124
YLR175W_YCR015C	0	0	12	3	0	1	506136	142168	507587	141215	483	317	9.5	7.33	54.704	36.278	0.059917355	0.056603774	0.055785124	0.018867925	0.090909091	0.091194969	0.020661157	0.01572327	0.010330579	0.050314465	0.012396694	0.01572327	0.134297521	0.100628931	0.026859504	0.031446541	0.099173554	0.056603774	0.074380165	0.094339623	0.035123967	0.031446541	0.07231405	0.044025157	0.047520661	0.088050314	0.018595041	0.028301887	0.02892562	0.034591195	0.016528926	0.022012579	0.055785124
YLR175W_YDL072C	0	0	12	4	0	1	506136	330447	507587	329836	483	203	9.5	7.19	54.704	22.902	0.059917355	0.029411765	0.055785124	0.073529412	0.090909091	0.132352941	0.020661157	0.019607843	0.010330579	0.058823529	0.012396694	0	0.134297521	0.068627451	0.026859504	0.039215686	0.099173554	0.058823529	0.074380165	0.088235294	0.035123967	0.029411765	0.07231405	0.073529412	0.047520661	0.093137255	0.018595041	0.009803922	0.02892562	0.029411765	0.016528926	0.004901961	0.055785124
YLR175W_YDL083C	0	0	12	4	0	1	506136	307789	507587	306926	483	143	9.5	11.08	54.704	15.847	0.059917355	0.083333333	0.055785124	0.083333333	0.090909091	0.076388889	0.020661157	0.006944444	0.010330579	0.041666667	0.012396694	0	0.134297521	0.118055556	0.026859504	0.041666667	0.099173554	0.041666667	0.074380165	0.076388889	0.035123967	0.041666667	0.07231405	0.097222222	0.047520661	0.055555556	0.018595041	0	0.02892562	0.041666667	0.016528926	0.020833333	0.055785124
YLR175W_YDL146W	0	0	12	4	0	0	506136	192751	507587	194226	483	491	9.5	5.8	54.704	56.549	0.059917355	0.022357724	0.055785124	0.036585366	0.090909091	0.136178862	0.020661157	0.036585366	0.010330579	0.042682927	0.012396694	0.004065041	0.134297521	0.069105691	0.026859504	0.032520325	0.099173554	0.058943089	0.074380165	0.091463415	0.035123967	0.046747967	0.07231405	0.046747967	0.047520661	0.069105691	0.018595041	0.018292683	0.02892562	0.046747967	0.016528926	0.014227642	0.055785124
YLR175W_YDR036C	0	0	12	4	0	1	506136	524711	507587	523209	483	500	9.5	8.4	54.704	56.288	0.059917355	0.043912176	0.055785124	0.067864271	0.090909091	0.091816367	0.020661157	0.02994012	0.010330579	0.051896208	0.012396694	0.007984032	0.134297521	0.071856287	0.026859504	0.03992016	0.099173554	0.061876248	0.074380165	0.079840319	0.035123967	0.047904192	0.07231405	0.055888224	0.047520661	0.053892216	0.018595041	0.015968064	0.02892562	0.033932136	0.016528926	0.011976048	0.055785124
YLR175W_YDR067C	0	0	12	4	0	1	506136	583464	507587	582790	483	224	9.5	9.53	54.704	26.024	0.059917355	0.013333333	0.055785124	0.031111111	0.090909091	0.088888889	0.020661157	0.022222222	0.010330579	0.04	0.012396694	0.008888889	0.134297521	0.093333333	0.026859504	0.013333333	0.099173554	0.066666667	0.074380165	0.084444444	0.035123967	0.053333333	0.07231405	0.084444444	0.047520661	0.08	0.018595041	0.026666667	0.02892562	0.04	0.016528926	0.022222222	0.055785124
YLR175W_YDR171W	0	0	12	4	0	0	506136	806619	507587	807746	483	375	9.5	4.84	54.704	42.817	0.059917355	0.063829787	0.055785124	0.045212766	0.090909091	0.063829787	0.020661157	0.010638298	0.010330579	0.02393617	0.012396694	0	0.134297521	0.066489362	0.026859504	0.053191489	0.099173554	0.114361702	0.074380165	0.061170213	0.035123967	0.093085106	0.07231405	0.04787234	0.047520661	0.039893617	0.018595041	0.002659574	0.02892562	0.063829787	0.016528926	0.031914894	0.055785124
YLR175W_YDR201W	0	0	12	4	0	0	506136	856315	507587	856812	483	165	9.5	4.59	54.704	18.909	0.059917355	0.030120482	0.055785124	0.042168675	0.090909091	0.15060241	0.020661157	0.048192771	0.010330579	0.006024096	0.012396694	0	0.134297521	0.102409639	0.026859504	0.048192771	0.099173554	0.120481928	0.074380165	0.072289157	0.035123967	0.024096386	0.07231405	0.06626506	0.047520661	0.018072289	0.018595041	0.006024096	0.02892562	0.018072289	0.016528926	0	0.055785124
YLR175W_YDR214W	0	0	12	4	0	0	506136	892873	507587	893925	483	350	9.5	7.52	54.704	39.435	0.059917355	0.056980057	0.055785124	0.045584046	0.090909091	0.071225071	0.020661157	0.005698006	0.010330579	0.062678063	0.012396694	0.01994302	0.134297521	0.102564103	0.026859504	0.03988604	0.099173554	0.085470085	0.074380165	0.113960114	0.035123967	0.042735043	0.07231405	0.074074074	0.047520661	0.054131054	0.018595041	0.008547009	0.02892562	0.022792023	0.016528926	0.017094017	0.055785124
YLR175W_YDR354W	0	0	12	4	0	0	506136	1184741	507587	1185883	483	380	9.5	6.65	54.704	41.374	0.059917355	0.076115486	0.055785124	0.065616798	0.090909091	0.128608924	0.020661157	0.015748031	0.010330579	0.034120735	0.012396694	0.010498688	0.134297521	0.073490814	0.026859504	0.018372703	0.099173554	0.057742782	0.074380165	0.099737533	0.035123967	0.049868766	0.07231405	0.065616798	0.047520661	0.057742782	0.018595041	0.01312336	0.02892562	0.028871391	0.016528926	0.044619423	0.055785124
YLR175W_YDR404C	0	0	12	4	0	1	506136	1277162	507587	1276647	483	171	9.5	7.83	54.704	19.058	0.059917355	0.081395349	0.055785124	0.029069767	0.090909091	0.069767442	0.020661157	0.023255814	0.010330579	0.063953488	0.012396694	0	0.134297521	0.075581395	0.026859504	0.040697674	0.099173554	0.052325581	0.074380165	0.087209302	0.035123967	0.046511628	0.07231405	0.093023256	0.047520661	0.087209302	0.018595041	0.023255814	0.02892562	0.034883721	0.016528926	0.023255814	0.055785124
YLR175W_YDR411C	0	0	12	4	0	1	506136	1294387	507587	1293362	483	341	9.5	10.44	54.704	38.13	0.059917355	0.093567251	0.055785124	0.046783626	0.090909091	0.084795322	0.020661157	0.026315789	0.010330579	0.058479532	0.012396694	0.026315789	0.134297521	0.01754386	0.026859504	0.038011696	0.099173554	0.01754386	0.074380165	0.087719298	0.035123967	0.055555556	0.07231405	0.049707602	0.047520661	0.073099415	0.018595041	0.014619883	0.02892562	0.049707602	0.016528926	0.011695906	0.055785124
YLR175W_YDR423C	0	0	12	4	0	1	506136	1319268	507587	1318039	483	409	9.5	7.03	54.704	45.751	0.059917355	0.03902439	0.055785124	0.068292683	0.090909091	0.097560976	0.020661157	0.017073171	0.010330579	0.014634146	0.012396694	0.007317073	0.134297521	0.085365854	0.026859504	0.053658537	0.099173554	0.070731707	0.074380165	0.097560976	0.035123967	0.03902439	0.07231405	0.036585366	0.047520661	0.063414634	0.018595041	0.029268293	0.02892562	0.019512195	0.016528926	0.017073171	0.055785124
YLR175W_YDR437W	0	0	12	4	0	0	506136	1337345	507587	1337767	483	140	9.5	4	54.704	16.089	0.059917355	0.042553191	0.055785124	0.035460993	0.090909091	0.141843972	0.020661157	0.04964539	0.010330579	0.035460993	0.012396694	0.028368794	0.134297521	0.035460993	0.026859504	0.035460993	0.099173554	0.042553191	0.074380165	0.078014184	0.035123967	0.042553191	0.07231405	0.035460993	0.047520661	0.092198582	0.018595041	0.014184397	0.02892562	0.063829787	0.016528926	0.007092199	0.055785124
YLR175W_YDR447C	0	0	12	4	0	1	506136	1355546	507587	1354822	483	136	9.5	11.28	54.704	15.803	0.059917355	0.04379562	0.055785124	0.04379562	0.090909091	0.109489051	0.020661157	0.01459854	0.010330579	0.01459854	0.012396694	0	0.134297521	0.102189781	0.026859504	0.051094891	0.099173554	0.051094891	0.074380165	0.072992701	0.035123967	0.02919708	0.07231405	0.072992701	0.047520661	0.051094891	0.018595041	0.00729927	0.02892562	0.03649635	0.016528926	0.00729927	0.055785124
YLR175W_YDR453C	0	0	12	4	0	1	506136	1365655	507587	1365065	483	196	9.5	7.34	54.704	21.615	0.059917355	0.07106599	0.055785124	0.086294416	0.090909091	0.091370558	0.020661157	0.005076142	0.010330579	0.055837563	0.012396694	0.015228426	0.134297521	0.091370558	0.026859504	0.025380711	0.099173554	0.060913706	0.074380165	0.050761421	0.035123967	0.055837563	0.07231405	0.091370558	0.047520661	0.060913706	0.018595041	0.010152284	0.02892562	0.025380711	0.016528926	0.010152284	0.055785124
YLR175W_YDR454C	0	0	12	4	0	1	506136	1366820	507587	1366257	483	187	9.5	7.31	54.704	20.637	0.059917355	0.069148936	0.055785124	0.079787234	0.090909091	0.063829787	0.020661157	0.015957447	0.010330579	0.058510638	0.012396694	0.005319149	0.134297521	0.10106383	0.026859504	0.021276596	0.099173554	0.079787234	0.074380165	0.10106383	0.035123967	0.037234043	0.07231405	0.069148936	0.047520661	0.058510638	0.018595041	0.005319149	0.02892562	0.031914894	0.016528926	0.005319149	0.055785124
YLR175W_YDR470C	0	0	12	4	0	1	506136	1401207	507587	1399699	483	502	9.5	7.11	54.704	57.47	0.059917355	0.051689861	0.055785124	0.043737575	0.090909091	0.099403579	0.020661157	0.02584493	0.010330579	0.061630219	0.012396694	0.019880716	0.134297521	0.067594433	0.026859504	0.03777336	0.099173554	0.055666004	0.074380165	0.07554672	0.035123967	0.039761431	0.07231405	0.053677932	0.047520661	0.083499006	0.018595041	0.005964215	0.02892562	0.027833002	0.016528926	0.011928429	0.055785124
YLR175W_YDR494W	0	0	12	4	0	0	506136	1436923	507587	1438008	483	361	9.5	10.77	54.704	41.216	0.059917355	0.044198895	0.055785124	0.038674033	0.090909091	0.085635359	0.020661157	0.03038674	0.010330579	0.038674033	0.012396694	0.002762431	0.134297521	0.107734807	0.026859504	0.069060773	0.099173554	0.060773481	0.074380165	0.099447514	0.035123967	0.049723757	0.07231405	0.069060773	0.047520661	0.024861878	0.018595041	0.005524862	0.02892562	0.024861878	0.016528926	0.011049724	0.055785124
YLR175W_YDR503C	0	0	12	4	0	1	506136	1455859	507587	1455035	483	274	9.5	8.25	54.704	31.586	0.059917355	0.043636364	0.055785124	0.029090909	0.090909091	0.123636364	0.020661157	0.036363636	0.010330579	0.054545455	0.012396694	0.025454545	0.134297521	0.054545455	0.026859504	0.018181818	0.099173554	0.029090909	0.074380165	0.087272727	0.035123967	0.04	0.07231405	0.08	0.047520661	0.083636364	0.018595041	0.036363636	0.02892562	0.036363636	0.016528926	0.025454545	0.055785124
YLR175W_YDR529C	0	0	12	4	0	1	506136	1496541	507587	1496158	483	127	9.5	5.76	54.704	14.565	0.059917355	0.0234375	0.055785124	0.1015625	0.090909091	0.125	0.020661157	0.015625	0.010330579	0.0234375	0.012396694	0.0078125	0.134297521	0.0703125	0.026859504	0.0390625	0.099173554	0.09375	0.074380165	0.046875	0.035123967	0.0625	0.07231405	0.0390625	0.047520661	0.0859375	0.018595041	0.0078125	0.02892562	0.046875	0.016528926	0.0234375	0.055785124
YLR175W_YEL045C	NA	NA	NA	NA	NA	NA	NA	NA	NA	NA	NA	NA	NA	NA	NA	NA	NA	NA	NA	NA	NA	NA	NA	NA	NA	NA	NA	NA	NA	NA	NA	NA	NA	NA	NA	NA	NA	NA	NA	NA	NA	NA	NA	NA	NA	NA	NA	NA	NA
YLR175W_YEL075C	0	0	12	5	0	1	506136	5713	507587	5345	483	122	9.5	8.4	54.704	13.994	0.059917355	0.048780488	0.055785124	0.032520325	0.090909091	0.048780488	0.020661157	0.024390244	0.010330579	0.089430894	0.012396694	0	0.134297521	0.105691057	0.026859504	0.016260163	0.099173554	0.089430894	0.074380165	0.089430894	0.035123967	0.048780488	0.07231405	0.105691057	0.047520661	0.048780488	0.018595041	0.008130081	0.02892562	0.016260163	0.016528926	0.016260163	0.055785124
YLR175W_YER134C	0	0	12	5	0	1	506136	437799	507587	437263	483	178	9.5	6.75	54.704	20.441	0.059917355	0.072625698	0.055785124	0.039106145	0.090909091	0.094972067	0.020661157	0.011173184	0.010330579	0.039106145	0.012396694	0.022346369	0.134297521	0.100558659	0.026859504	0.016759777	0.099173554	0.055865922	0.074380165	0.05027933	0.035123967	0.05027933	0.07231405	0.067039106	0.047520661	0.061452514	0.018595041	0.022346369	0.02892562	0.061452514	0.016528926	0.016759777	0.055785124
YLR175W_YER144C	0	0	12	5	0	1	506136	460218	507587	457801	483	805	9.5	8.28	54.704	92.26	0.059917355	0.037220844	0.055785124	0.038461538	0.090909091	0.104218362	0.020661157	0.018610422	0.010330579	0.054590571	0.012396694	0.007444169	0.134297521	0.05707196	0.026859504	0.063275434	0.099173554	0.045905707	0.074380165	0.086848635	0.035123967	0.064516129	0.07231405	0.049627792	0.047520661	0.064516129	0.018595041	0.024813896	0.02892562	0.035980149	0.016528926	0.024813896	0.055785124
YLR175W_YER148W	0	0	12	5	0	0	506136	465298	507587	466020	483	240	9.5	10.16	54.704	27.003	0.059917355	0.049792531	0.055785124	0.095435685	0.090909091	0.066390041	0.020661157	0.020746888	0.010330579	0.062240664	0.012396694	0.004149378	0.134297521	0.091286307	0.026859504	0.033195021	0.099173554	0.078838174	0.074380165	0.058091286	0.035123967	0.045643154	0.07231405	0.066390041	0.047520661	0.078838174	0.018595041	0.008298755	0.02892562	0.024896266	0.016528926	0.008298755	0.055785124
YLR175W_YER189W	0	0	12	5	0	0	506136	571150	507587	571518	483	122	9.5	7.46	54.704	14.008	0.059917355	0.048780488	0.055785124	0.032520325	0.090909091	0.048780488	0.020661157	0.024390244	0.010330579	0.089430894	0.012396694	0	0.134297521	0.097560976	0.026859504	0.024390244	0.099173554	0.089430894	0.074380165	0.089430894	0.035123967	0.048780488	0.07231405	0.097560976	0.047520661	0.056910569	0.018595041	0.008130081	0.02892562	0.016260163	0.016528926	0.016260163	0.055785124
YLR175W_YFL064C	0	0	12	6	0	1	506136	3846	507587	3322	483	174	9.5	9.18	54.704	20.427	0.059917355	0.04	0.055785124	0.028571429	0.090909091	0.085714286	0.020661157	0.022857143	0.010330579	0.085714286	0.012396694	0	0.134297521	0.091428571	0.026859504	0.028571429	0.099173554	0.074285714	0.074380165	0.074285714	0.035123967	0.045714286	0.07231405	0.068571429	0.047520661	0.045714286	0.018595041	0.017142857	0.02892562	0.051428571	0.016528926	0.017142857	0.055785124
YLR175W_YFL065C	0	0	12	6	0	1	506136	3338	507587	3030	483	102	9.5	9.82	54.704	11.785	0.059917355	0.038834951	0.055785124	0.038834951	0.090909091	0.106796117	0.020661157	0.038834951	0.010330579	0.048543689	0.012396694	0	0.134297521	0.087378641	0.026859504	0.029126214	0.099173554	0.038834951	0.074380165	0.077669903	0.035123967	0.058252427	0.07231405	0.058252427	0.047520661	0.058252427	0.018595041	0.038834951	0.02892562	0.038834951	0.016528926	0.019417476	0.055785124
YLR175W_YGL053W	0	0	12	7	0	0	506136	402592	507587	403305	483	237	9.5	4.86	54.704	27.25	0.059917355	0.046218487	0.055785124	0.054621849	0.090909091	0.092436975	0.020661157	0.016806723	0.010330579	0.06302521	0.012396694	0.016806723	0.134297521	0.067226891	0.026859504	0.037815126	0.099173554	0.079831933	0.074380165	0.079831933	0.035123967	0.042016807	0.07231405	0.050420168	0.047520661	0.079831933	0.018595041	0.016806723	0.02892562	0.050420168	0.016528926	0.016806723	0.055785124
YLR175W_YGL059W	0	0	12	7	0	0	506136	392228	507587	393703	483	491	9.5	8.12	54.704	57.356	0.059917355	0.040650407	0.055785124	0.032520325	0.090909091	0.115853659	0.020661157	0.028455285	0.010330579	0.042682927	0.012396694	0.004065041	0.134297521	0.077235772	0.026859504	0.038617886	0.099173554	0.073170732	0.074380165	0.073170732	0.035123967	0.044715447	0.07231405	0.048780488	0.047520661	0.071138211	0.018595041	0.010162602	0.02892562	0.069105691	0.016528926	0.034552846	0.055785124
YLR175W_YGL087C	0	0	12	7	0	1	506136	346907	507587	346409	483	137	9.5	6.76	54.704	15.545	0.059917355	0.065217391	0.055785124	0.028985507	0.090909091	0.094202899	0.020661157	0.028985507	0.010330579	0.036231884	0.012396694	0.014492754	0.134297521	0.079710145	0.026859504	0.014492754	0.099173554	0.079710145	0.074380165	0.065217391	0.035123967	0.086956522	0.07231405	0.028985507	0.047520661	0.043478261	0.018595041	0.02173913	0.02892562	0.028985507	0.016528926	0.02173913	0.055785124
YLR175W_YGL088W	NA	NA	NA	NA	NA	NA	NA	NA	NA	NA	NA	NA	NA	NA	NA	NA	NA	NA	NA	NA	NA	NA	NA	NA	NA	NA	NA	NA	NA	NA	NA	NA	NA	NA	NA	NA	NA	NA	NA	NA	NA	NA	NA	NA	NA	NA	NA	NA	NA
YLR175W_YGL098W	0	0	12	7	0	0	506136	317345	507587	318082	483	245	9.5	5.01	54.704	28.106	0.059917355	0.048780488	0.055785124	0.052845528	0.090909091	0.109756098	0.020661157	0.024390244	0.010330579	0.044715447	0.012396694	0	0.134297521	0.073170732	0.026859504	0.085365854	0.099173554	0.073170732	0.074380165	0.093495935	0.035123967	0.012195122	0.07231405	0.056910569	0.047520661	0.052845528	0.018595041	0	0.02892562	0.048780488	0.016528926	0.012195122	0.055785124
YLR175W_YGL127C	0	0	12	7	0	1	506136	270781	507587	270398	483	127	9.5	4.26	54.704	14.741	0.059917355	0.0390625	0.055785124	0.0390625	0.090909091	0.125	0.020661157	0.03125	0.010330579	0.0390625	0.012396694	0.03125	0.134297521	0.0390625	0.026859504	0.078125	0.099173554	0.078125	0.074380165	0.0625	0.035123967	0.078125	0.07231405	0.0390625	0.047520661	0.0625	0.018595041	0.0234375	0.02892562	0.0546875	0.016528926	0	0.055785124
YLR175W_YGL173C	0	0	12	7	0	1	506136	180119	507587	175533	483	1528	9.5	7.5	54.704	175.458	0.059917355	0.053629823	0.055785124	0.043165468	0.090909091	0.095487247	0.020661157	0.023544801	0.010330579	0.051013734	0.012396694	0.008502289	0.134297521	0.090255069	0.026859504	0.041203401	0.099173554	0.073904513	0.074380165	0.069980379	0.035123967	0.059516024	0.07231405	0.047089601	0.047520661	0.062132112	0.018595041	0.003924133	0.02892562	0.038587312	0.016528926	0.028122956	0.055785124
YLR175W_YGL231C	0	0	12	7	0	1	506136	63620	507587	63048	483	190	9.5	10.45	54.704	21.46	0.059917355	0.057591623	0.055785124	0.068062827	0.090909091	0.083769634	0.020661157	0.052356021	0.010330579	0.036649215	0.012396694	0.02617801	0.134297521	0.068062827	0.026859504	0.089005236	0.099173554	0.031413613	0.074380165	0.089005236	0.035123967	0.057591623	0.07231405	0.036649215	0.047520661	0.078534031	0.018595041	0	0.02892562	0.041884817	0.016528926	0.010471204	0.055785124
YLR175W_YGR020C	0	0	12	7	0	1	506136	527333	507587	526977	483	118	9.5	4.78	54.704	13.461	0.059917355	0.042016807	0.055785124	0.075630252	0.090909091	0.075630252	0.020661157	0.008403361	0.010330579	0.058823529	0.012396694	0	0.134297521	0.075630252	0.026859504	0.033613445	0.099173554	0.109243697	0.074380165	0.025210084	0.035123967	0.042016807	0.07231405	0.042016807	0.047520661	0.100840336	0.018595041	0	0.02892562	0.016806723	0.016528926	0.025210084	0.055785124
YLR175W_YGR084C	0	0	12	7	0	1	506136	648146	507587	647127	483	339	9.5	10.26	54.704	38.988	0.059917355	0.041176471	0.055785124	0.064705882	0.090909091	0.117647059	0.020661157	0.014705882	0.010330579	0.041176471	0.012396694	0.014705882	0.134297521	0.088235294	0.026859504	0.044117647	0.099173554	0.061764706	0.074380165	0.052941176	0.035123967	0.058823529	0.07231405	0.035294118	0.047520661	0.079411765	0.018595041	0.002941176	0.02892562	0.035294118	0.016528926	0.026470588	0.055785124
YLR175W_YGR257C	0	0	12	7	0	1	506136	1007311	507587	1006211	483	366	9.5	10.12	54.704	40.763	0.059917355	0.057220708	0.055785124	0.079019074	0.090909091	0.089918256	0.020661157	0.04359673	0.010330579	0.046321526	0.012396694	0.024523161	0.134297521	0.0626703	0.026859504	0.027247956	0.099173554	0.04359673	0.074380165	0.108991826	0.035123967	0.038147139	0.07231405	0.049046322	0.047520661	0.070844687	0.018595041	0.024523161	0.02892562	0.021798365	0.016528926	0.010899183	0.055785124
YLR175W_YHL009C	0	1	12	8	0	1	506136	85056	507587	84064	483	330	9.5	4.87	54.704	37.955	0.059917355	0.027190332	0.055785124	0.051359517	0.090909091	0.090634441	0.020661157	0.024169184	0.010330579	0.039274924	0.012396694	0.003021148	0.134297521	0.075528701	0.026859504	0.051359517	0.099173554	0.087613293	0.074380165	0.090634441	0.035123967	0.045317221	0.07231405	0.027190332	0.047520661	0.039274924	0.018595041	0.021148036	0.02892562	0.036253776	0.016528926	0.01510574	0.055785124
YLR175W_YHL015W	0	0	12	8	0	0	506136	75409	507587	75774	483	121	9.5	10.33	54.704	13.907	0.059917355	0.032786885	0.055785124	0.024590164	0.090909091	0.049180328	0.020661157	0.016393443	0.010330579	0.008196721	0.012396694	0.008196721	0.134297521	0.114754098	0.026859504	0.090163934	0.099173554	0.098360656	0.074380165	0.057377049	0.035123967	0.040983607	0.07231405	0.114754098	0.047520661	0.098360656	0.018595041	0	0.02892562	0.016393443	0.016528926	0.016393443	0.055785124
YLR175W_YHL049C	0	0	12	8	0	1	506136	4540	507587	3725	483	271	9.5	9.67	54.704	31.505	0.059917355	0.036764706	0.055785124	0.033088235	0.090909091	0.091911765	0.020661157	0.029411765	0.010330579	0.069852941	0.012396694	0	0.134297521	0.091911765	0.026859504	0.022058824	0.099173554	0.0625	0.074380165	0.080882353	0.035123967	0.047794118	0.07231405	0.073529412	0.047520661	0.047794118	0.018595041	0.022058824	0.02892562	0.040441176	0.016528926	0.022058824	0.055785124
YLR175W_YHR003C	0	0	12	8	0	1	506136	111312	507587	110023	483	429	9.5	6.77	54.704	48.883	0.059917355	0.046511628	0.055785124	0.060465116	0.090909091	0.093023256	0.020661157	0.027906977	0.010330579	0.030232558	0.012396694	0.01627907	0.134297521	0.081395349	0.026859504	0.020930233	0.099173554	0.093023256	0.074380165	0.081395349	0.035123967	0.030232558	0.07231405	0.060465116	0.047520661	0.08372093	0.018595041	0.020930233	0.02892562	0.027906977	0.016528926	0.020930233	0.055785124
YLR175W_YHR013C	0	0	12	8	0	1	506136	131440	507587	130724	483	238	9.5	4.61	54.704	27.603	0.059917355	0.033472803	0.055785124	0.058577406	0.090909091	0.117154812	0.020661157	0.041841004	0.010330579	0.016736402	0.012396694	0.0041841	0.134297521	0.050209205	0.026859504	0.041841004	0.099173554	0.092050209	0.074380165	0.046025105	0.035123967	0.033472803	0.07231405	0.050209205	0.047520661	0.062761506	0.018595041	0.008368201	0.02892562	0.050209205	0.016528926	0.029288703	0.055785124
YLR175W_YHR136C	0	0	12	8	0	1	506136	375103	507587	374657	483	148	9.5	6.36	54.704	17.036	0.059917355	0.053691275	0.055785124	0.053691275	0.090909091	0.067114094	0.020661157	0.020134228	0.010330579	0.026845638	0.012396694	0.013422819	0.134297521	0.060402685	0.026859504	0.080536913	0.099173554	0.087248322	0.074380165	0.11409396	0.035123967	0.026845638	0.07231405	0.033557047	0.047520661	0.053691275	0.018595041	0.013422819	0.02892562	0.046979866	0.016528926	0.033557047	0.055785124
YLR175W_YHR147C	0	0	12	8	0	1	506136	393286	507587	392642	483	214	9.5	10.7	54.704	23.889	0.059917355	0.079069767	0.055785124	0.03255814	0.090909091	0.093023256	0.020661157	0.018604651	0.010330579	0.03255814	0.012396694	0.004651163	0.134297521	0.097674419	0.026859504	0.051162791	0.099173554	0.051162791	0.074380165	0.069767442	0.035123967	0.051162791	0.07231405	0.093023256	0.047520661	0.08372093	0.018595041	0.004651163	0.02892562	0.018604651	0.016528926	0.027906977	0.055785124
YLR175W_YHR187W	0	0	12	8	0	0	506136	480990	507587	481919	483	309	9.5	4.55	54.704	35.219	0.059917355	0.032258065	0.055785124	0.04516129	0.090909091	0.1	0.020661157	0.019354839	0.010330579	0.04516129	0.012396694	0.003225806	0.134297521	0.058064516	0.026859504	0.048387097	0.099173554	0.080645161	0.074380165	0.087096774	0.035123967	0.041935484	0.07231405	0.05483871	0.047520661	0.074193548	0.018595041	0.009677419	0.02892562	0.048387097	0.016528926	0.022580645	0.055785124
YLR175W_YHR199C	0	0	12	8	0	1	506136	498422	507587	497490	483	310	9.5	9.77	54.704	34.113	0.059917355	0.051446945	0.055785124	0.096463023	0.090909091	0.102893891	0.020661157	0.019292605	0.010330579	0.041800643	0.012396694	0.009646302	0.134297521	0.096463023	0.026859504	0.028938907	0.099173554	0.038585209	0.074380165	0.093247588	0.035123967	0.054662379	0.07231405	0.07073955	0.047520661	0.051446945	0.018595041	0.012861736	0.02892562	0.028938907	0.016528926	0.01607717	0.055785124
YLR175W_YIL010W	0	0	12	9	0	0	506136	334879	507587	335526	483	215	9.5	10.13	54.704	24.119	0.059917355	0.046296296	0.055785124	0.064814815	0.090909091	0.083333333	0.020661157	0.009259259	0.010330579	0.046296296	0.012396694	0	0.134297521	0.115740741	0.026859504	0.032407407	0.099173554	0.087962963	0.074380165	0.092592593	0.035123967	0.055555556	0.07231405	0.074074074	0.047520661	0.055555556	0.018595041	0.009259259	0.02892562	0.018518519	0.016528926	0.013888889	0.055785124
YLR175W_YIL083C	0	0	12	9	0	1	506136	204650	507587	203553	483	365	9.5	8.59	54.704	41.893	0.059917355	0.038251366	0.055785124	0.054644809	0.090909091	0.106557377	0.020661157	0.016393443	0.010330579	0.049180328	0.012396694	0.010928962	0.134297521	0.081967213	0.026859504	0.032786885	0.099173554	0.071038251	0.074380165	0.06557377	0.035123967	0.049180328	0.07231405	0.057377049	0.047520661	0.068306011	0.018595041	0.005464481	0.02892562	0.038251366	0.016528926	0.027322404	0.055785124
YLR175W_YJL065C	0	0	12	10	0	1	506136	315551	507587	315048	483	167	9.5	4.02	54.704	18.792	0.059917355	0.011904762	0.055785124	0.06547619	0.090909091	0.077380952	0.020661157	0.017857143	0.010330579	0.029761905	0.012396694	0	0.134297521	0.035714286	0.026859504	0.071428571	0.099173554	0.083333333	0.074380165	0.06547619	0.035123967	0.071428571	0.07231405	0.095238095	0.047520661	0.035714286	0.018595041	0.005952381	0.02892562	0.029761905	0.016528926	0.023809524	0.055785124
YLR175W_YJL066C	0	0	12	10	0	1	506136	314866	507587	314108	483	252	9.5	5.73	54.704	28.47	0.059917355	0.04743083	0.055785124	0.063241107	0.090909091	0.090909091	0.020661157	0.015810277	0.010330579	0.059288538	0.012396694	0.019762846	0.134297521	0.09486166	0.026859504	0.035573123	0.099173554	0.043478261	0.074380165	0.075098814	0.035123967	0.059288538	0.07231405	0.039525692	0.047520661	0.043478261	0.018595041	0.007905138	0.02892562	0.019762846	0.016528926	0.019762846	0.055785124
YLR175W_YJL083W	0	0	12	10	0	0	506136	278835	507587	280649	483	604	9.5	10.47	54.704	68.767	0.059917355	0.034710744	0.055785124	0.049586777	0.090909091	0.082644628	0.020661157	0.019834711	0.010330579	0.018181818	0.012396694	0.011570248	0.134297521	0.072727273	0.026859504	0.042975207	0.099173554	0.049586777	0.074380165	0.123966942	0.035123967	0.069421488	0.07231405	0.051239669	0.047520661	0.036363636	0.018595041	0.003305785	0.02892562	0.034710744	0.016528926	0.046280992	0.055785124
YLR175W_YJL097W	0	0	12	10	0	0	506136	245586	507587	246239	483	217	9.5	10.84	54.704	24.51	0.059917355	0.04587156	0.055785124	0.073394495	0.090909091	0.178899083	0.020661157	0.027522936	0.010330579	0.055045872	0.012396694	0.013761468	0.134297521	0.055045872	0.026859504	0.036697248	0.099173554	0.018348624	0.074380165	0.091743119	0.035123967	0.04587156	0.07231405	0.087155963	0.047520661	0.082568807	0.018595041	0.009174312	0.02892562	0.068807339	0.016528926	0.004587156	0.055785124
YLR175W_YJL121C	0	0	12	10	0	1	506136	191088	507587	190372	483	238	9.5	6.24	54.704	25.967	0.059917355	0.066945607	0.055785124	0.09623431	0.090909091	0.075313808	0.020661157	0.041841004	0.010330579	0.054393305	0.012396694	0.008368201	0.134297521	0.079497908	0.026859504	0.020920502	0.099173554	0.054393305	0.074380165	0.046025105	0.035123967	0.066945607	0.07231405	0.083682008	0.047520661	0.058577406	0.018595041	0.020920502	0.02892562	0.0041841	0.016528926	0.037656904	0.055785124
YLR175W_YJL142C	NA	NA	NA	NA	NA	NA	NA	NA	NA	NA	NA	NA	NA	NA	NA	NA	NA	NA	NA	NA	NA	NA	NA	NA	NA	NA	NA	NA	NA	NA	NA	NA	NA	NA	NA	NA	NA	NA	NA	NA	NA	NA	NA	NA	NA	NA	NA	NA	NA
YLR175W_YJL190C	0	0	12	10	0	1	506136	75301	507587	74909	483	130	9.5	10.76	54.704	14.626	0.059917355	0.083969466	0.055785124	0.061068702	0.090909091	0.076335878	0.020661157	0.022900763	0.010330579	0.038167939	0.012396694	0.007633588	0.134297521	0.083969466	0.026859504	0.038167939	0.099173554	0.045801527	0.074380165	0.061068702	0.035123967	0.022900763	0.07231405	0.083969466	0.047520661	0.099236641	0.018595041	0.007633588	0.02892562	0.030534351	0.016528926	0.030534351	0.055785124
YLR175W_YJR013W	0	0	12	10	0	0	506136	460374	507587	461585	483	403	9.5	9.86	54.704	47.166	0.059917355	0.064356436	0.055785124	0.03960396	0.090909091	0.143564356	0.020661157	0.017326733	0.010330579	0.079207921	0.012396694	0.032178218	0.134297521	0.044554455	0.026859504	0.032178218	0.099173554	0.027227723	0.074380165	0.04950495	0.035123967	0.032178218	0.07231405	0.066831683	0.047520661	0.074257426	0.018595041	0.014851485	0.02892562	0.074257426	0.016528926	0.01980198	0.055785124
YLR175W_YJR056C	0	0	12	10	0	1	506136	542494	507587	541784	483	236	9.5	6.95	54.704	27.361	0.059917355	0.025316456	0.055785124	0.054852321	0.090909091	0.097046414	0.020661157	0.016877637	0.010330579	0.029535865	0.012396694	0.008438819	0.134297521	0.075949367	0.026859504	0.033755274	0.099173554	0.097046414	0.074380165	0.092827004	0.035123967	0.050632911	0.07231405	0.029535865	0.047520661	0.037974684	0.018595041	0.012658228	0.02892562	0.021097046	0.016528926	0.033755274	0.055785124
YLR175W_YJR059W	0	0	12	10	0	0	506136	545779	507587	548235	483	818	9.5	9.52	54.704	91.4	0.059917355	0.051282051	0.055785124	0.046398046	0.090909091	0.072039072	0.020661157	0.023199023	0.010330579	0.039072039	0.012396694	0.004884005	0.134297521	0.089133089	0.026859504	0.023199023	0.099173554	0.051282051	0.074380165	0.114774115	0.035123967	0.064713065	0.07231405	0.045177045	0.047520661	0.045177045	0.018595041	0.00976801	0.02892562	0.026862027	0.016528926	0.036630037	0.055785124
YLR175W_YJR129C	0	0	12	10	0	1	506136	665009	507587	663990	483	339	9.5	4.77	54.704	38.996	0.059917355	0.041176471	0.055785124	0.052941176	0.090909091	0.117647059	0.020661157	0.023529412	0.010330579	0.032352941	0.012396694	0.011764706	0.134297521	0.076470588	0.026859504	0.035294118	0.099173554	0.088235294	0.074380165	0.041176471	0.035123967	0.035294118	0.07231405	0.067647059	0.047520661	0.064705882	0.018595041	0.029411765	0.02892562	0.044117647	0.016528926	0.014705882	0.055785124
YLR175W_YKL091C	0	0	12	11	0	1	506136	270294	507587	269362	483	310	9.5	7.95	54.704	36.073	0.059917355	0.054662379	0.055785124	0.038585209	0.090909091	0.093247588	0.020661157	0.025723473	0.010330579	0.048231511	0.012396694	0.006430868	0.134297521	0.083601286	0.026859504	0.022508039	0.099173554	0.083601286	0.074380165	0.061093248	0.035123967	0.057877814	0.07231405	0.045016077	0.047520661	0.073954984	0.018595041	0.009646302	0.02892562	0.07073955	0.016528926	0.01607717	0.055785124
YLR175W_YKL094W	0	0	12	11	0	0	506136	262993	507587	263934	483	313	9.5	8.5	54.704	35.562	0.059917355	0.089171975	0.055785124	0.044585987	0.090909091	0.076433121	0.020661157	0.031847134	0.010330579	0.060509554	0.012396694	0.00955414	0.134297521	0.082802548	0.026859504	0.041401274	0.099173554	0.047770701	0.074380165	0.050955414	0.035123967	0.057324841	0.07231405	0.044585987	0.047520661	0.060509554	0.018595041	0.012738854	0.02892562	0.047770701	0.016528926	0.038216561	0.055785124
YLR175W_YKL156W	0	0	12	11	0	0	506136	158619	507587	159217	483	82	9.5	9.51	54.704	8.879	0.059917355	0.060240964	0.055785124	0.072289157	0.090909091	0.108433735	0.020661157	0.012048193	0.010330579	0.036144578	0.012396694	0	0.134297521	0.084337349	0.026859504	0.036144578	0.099173554	0.036144578	0.074380165	0.084337349	0.035123967	0.048192771	0.07231405	0.072289157	0.047520661	0.024096386	0.018595041	0.060240964	0.02892562	0.012048193	0.016528926	0.036144578	0.055785124
YLR175W_YKL157W	0	0	12	11	0	0	506136	154996	507587	158186	483	935	9.5	7.96	54.704	105.584	0.059917355	0.052350427	0.055785124	0.068376068	0.090909091	0.08974359	0.020661157	0.02457265	0.010330579	0.051282051	0.012396694	0.02457265	0.134297521	0.083333333	0.026859504	0.033119658	0.099173554	0.058760684	0.074380165	0.080128205	0.035123967	0.040598291	0.07231405	0.071581197	0.047520661	0.050213675	0.018595041	0.007478632	0.02892562	0.02991453	0.016528926	0.016025641	0.055785124
YLR175W_YKL186C	0	0	12	11	0	1	506136	93303	507587	92749	483	184	9.5	7.93	54.704	20.783	0.059917355	0.054054054	0.055785124	0.059459459	0.090909091	0.064864865	0.020661157	0.037837838	0.010330579	0.059459459	0.012396694	0.010810811	0.134297521	0.043243243	0.026859504	0.07027027	0.099173554	0.010810811	0.074380165	0.037837838	0.035123967	0.059459459	0.07231405	0.059459459	0.047520661	0.07027027	0.018595041	0.016216216	0.02892562	0.021621622	0.016528926	0.016216216	0.055785124
YLR175W_YKR091W	0	0	12	11	0	0	506136	611167	507587	611907	483	246	9.5	8.63	54.704	27.465	0.059917355	0.012145749	0.055785124	0.064777328	0.090909091	0.076923077	0.020661157	0.016194332	0.010330579	0.036437247	0.012396694	0.008097166	0.134297521	0.072874494	0.026859504	0.028340081	0.099173554	0.072874494	0.074380165	0.141700405	0.035123967	0.089068826	0.07231405	0.052631579	0.047520661	0.036437247	0.018595041	0.008097166	0.02892562	0.016194332	0.016528926	0.028340081	0.055785124
YLR175W_YLR018C	0	0	12	12	0	1	506136	179605	507587	178706	483	299	9.5	10.62	54.704	34.232	0.059917355	0.04	0.055785124	0.036666667	0.090909091	0.12	0.020661157	0.033333333	0.010330579	0.046666667	0.012396694	0.013333333	0.134297521	0.076666667	0.026859504	0.063333333	0.099173554	0.03	0.074380165	0.093333333	0.035123967	0.05	0.07231405	0.046666667	0.047520661	0.046666667	0.018595041	0.003333333	0.02892562	0.026666667	0.016528926	0.04	0.055785124
YLR175W_YLR021W	0	0	12	12	0	0	506136	183622	507587	184161	483	179	9.5	4.54	54.704	20.06	0.059917355	0.055555556	0.055785124	0.05	0.090909091	0.1	0.020661157	0.033333333	0.010330579	0.033333333	0.012396694	0.005555556	0.134297521	0.066666667	0.026859504	0.044444444	0.099173554	0.066666667	0.074380165	0.088888889	0.035123967	0.033333333	0.07231405	0.077777778	0.047520661	0.055555556	0.018595041	0.011111111	0.02892562	0.038888889	0.016528926	0.016666667	0.055785124
YLR175W_YLR036C	0	0	12	12	0	1	506136	222133	507587	221522	483	203	9.5	10.15	54.704	23.378	0.059917355	0.044117647	0.055785124	0.053921569	0.090909091	0.112745098	0.020661157	0.024509804	0.010330579	0.078431373	0.012396694	0.009803922	0.134297521	0.102941176	0.026859504	0.029411765	0.099173554	0.044117647	0.074380165	0.068627451	0.035123967	0.029411765	0.07231405	0.049019608	0.047520661	0.093137255	0.018595041	0.039215686	0.02892562	0.044117647	0.016528926	0.014705882	0.055785124
YLR175W_YLR073C	0	0	12	12	0	1	506136	281622	507587	281020	483	200	9.5	10	54.704	22.85	0.059917355	0.009950249	0.055785124	0.074626866	0.090909091	0.109452736	0.020661157	0.009950249	0.010330579	0.044776119	0.012396694	0	0.134297521	0.069651741	0.026859504	0.07960199	0.099173554	0.044776119	0.074380165	0.124378109	0.035123967	0.049751244	0.07231405	0.029850746	0.047520661	0.069651741	0.018595041	0.014925373	0.02892562	0.054726368	0.016528926	0.009950249	0.055785124
YLR175W_YLR078C	0	0	12	12	0	1	506136	286560	507587	285737	483	244	9.5	9.75	54.704	27.5	0.059917355	0.065306122	0.055785124	0.06122449	0.090909091	0.106122449	0.020661157	0.020408163	0.010330579	0.040816327	0.012396694	0.008163265	0.134297521	0.07755102	0.026859504	0.073469388	0.099173554	0.065306122	0.074380165	0.085714286	0.035123967	0.016326531	0.07231405	0.053061224	0.047520661	0.057142857	0.018595041	0	0.02892562	0.032653061	0.016528926	0.016326531	0.055785124
YLR175W_YLR186W	0	0	12	12	0	0	506136	523634	507587	524392	483	252	9.5	8.45	54.704	27.895	0.059917355	0.055335968	0.055785124	0.063241107	0.090909091	0.110671937	0.020661157	0.023715415	0.010330579	0.023715415	0.012396694	0.003952569	0.134297521	0.086956522	0.026859504	0.031620553	0.099173554	0.043478261	0.074380165	0.075098814	0.035123967	0.051383399	0.07231405	0.083003953	0.047520661	0.067193676	0.018595041	0.023715415	0.02892562	0.019762846	0.016528926	0.023715415	0.055785124
YLR175W_YLR367W	0	0	12	12	0	0	506136	856441	507587	857316	483	130	9.5	10.76	54.704	14.626	0.059917355	0.083969466	0.055785124	0.061068702	0.090909091	0.083969466	0.020661157	0.022900763	0.010330579	0.038167939	0.012396694	0.007633588	0.134297521	0.083969466	0.026859504	0.038167939	0.099173554	0.045801527	0.074380165	0.061068702	0.035123967	0.022900763	0.07231405	0.083969466	0.047520661	0.091603053	0.018595041	0.007633588	0.02892562	0.030534351	0.016528926	0.030534351	0.055785124
YLR175W_YLR410W	0	0	12	12	0	0	506136	937539	507587	940979	483	1146	9.5	9.11	54.704	129.754	0.059917355	0.048823017	0.055785124	0.048823017	0.090909091	0.087183958	0.020661157	0.025283348	0.010330579	0.040104621	0.012396694	0.008718396	0.134297521	0.098517873	0.026859504	0.030514385	0.099173554	0.071490846	0.074380165	0.088055798	0.035123967	0.056669573	0.07231405	0.053182214	0.047520661	0.066259808	0.018595041	0.009590235	0.02892562	0.024411508	0.016528926	0.022667829	0.055785124
YLR175W_YLR412W	0	0	12	12	0	0	506136	948366	507587	949190	483	274	9.5	7.17	54.704	31.707	0.059917355	0.021818182	0.055785124	0.058181818	0.090909091	0.105454545	0.020661157	0.007272727	0.010330579	0.054545455	0.012396694	0.010909091	0.134297521	0.112727273	0.026859504	0.025454545	0.099173554	0.072727273	0.074380165	0.072727273	0.035123967	0.050909091	0.07231405	0.047272727	0.047520661	0.065454545	0.018595041	0.010909091	0.02892562	0.043636364	0.016528926	0.025454545	0.055785124
YLR175W_YLR414C	0	0	12	12	0	1	506136	954141	507587	953350	483	263	9.5	8.54	54.704	29.251	0.059917355	0.053030303	0.055785124	0.068181818	0.090909091	0.125	0.020661157	0.026515152	0.010330579	0.060606061	0.012396694	0.018939394	0.134297521	0.037878788	0.026859504	0.015151515	0.099173554	0.022727273	0.074380165	0.117424242	0.035123967	0.034090909	0.07231405	0.068181818	0.047520661	0.098484848	0.018595041	0.026515152	0.02892562	0.053030303	0.016528926	0.015151515	0.055785124
YLR175W_YLR463C	NA	NA	NA	NA	NA	NA	NA	NA	NA	NA	NA	NA	NA	NA	NA	NA	NA	NA	NA	NA	NA	NA	NA	NA	NA	NA	NA	NA	NA	NA	NA	NA	NA	NA	NA	NA	NA	NA	NA	NA	NA	NA	NA	NA	NA	NA	NA	NA	NA
YLR175W_YLR464W	0	0	12	12	0	0	506136	1066570	507587	1067499	483	216	9.5	7.61	54.704	24.17	0.059917355	0.046082949	0.055785124	0.059907834	0.090909091	0.105990783	0.020661157	0.023041475	0.010330579	0.01843318	0.012396694	0.00921659	0.134297521	0.064516129	0.026859504	0.02764977	0.099173554	0.046082949	0.074380165	0.082949309	0.035123967	0.046082949	0.07231405	0.050691244	0.047520661	0.078341014	0.018595041	0.032258065	0.02892562	0.023041475	0.016528926	0.01843318	0.055785124
YLR175W_YMR005W	0	0	12	13	0	0	506136	276045	507587	277211	483	388	9.5	10.47	54.704	42.336	0.059917355	0.05655527	0.055785124	0.082262211	0.090909091	0.06940874	0.020661157	0.020565553	0.010330579	0.017994859	0.012396694	0.002570694	0.134297521	0.097686375	0.026859504	0.035989717	0.099173554	0.061696658	0.074380165	0.123393316	0.035123967	0.051413882	0.07231405	0.053984576	0.047520661	0.046272494	0.018595041	0.002570694	0.02892562	0.015424165	0.016528926	0.020565553	0.055785124
YLR175W_YMR037C	0	1	12	13	0	1	506136	346516	507587	344402	483	704	9.5	6.55	54.704	77.86	0.059917355	0.025531915	0.055785124	0.038297872	0.090909091	0.079432624	0.020661157	0.025531915	0.010330579	0.026950355	0.012396694	0.00141844	0.134297521	0.043971631	0.026859504	0.042553191	0.099173554	0.032624113	0.074380165	0.156028369	0.035123967	0.062411348	0.07231405	0.028368794	0.047520661	0.055319149	0.018595041	0.007092199	0.02892562	0.018439716	0.016528926	0.029787234	0.055785124
YLR175W_YMR079W	0	0	12	13	0	0	506136	424988	507587	426058	483	304	9.5	5.26	54.704	34.9	0.059917355	0.059016393	0.055785124	0.062295082	0.090909091	0.095081967	0.020661157	0.026229508	0.010330579	0.055737705	0.012396694	0.009836066	0.134297521	0.078688525	0.026859504	0.036065574	0.099173554	0.091803279	0.074380165	0.072131148	0.035123967	0.062295082	0.07231405	0.049180328	0.047520661	0.045901639	0.018595041	0.013114754	0.02892562	0.059016393	0.016528926	0.013114754	0.055785124
YLR175W_YMR109W	0	0	12	13	0	0	506136	486586	507587	490245	483	1219	9.5	10.09	54.704	136.898	0.059917355	0.051639344	0.055785124	0.089344262	0.090909091	0.069672131	0.020661157	0.017213115	0.010330579	0.03442623	0.012396694	0.008196721	0.134297521	0.07704918	0.026859504	0.051639344	0.099173554	0.056557377	0.074380165	0.073770492	0.035123967	0.055737705	0.07231405	0.050819672	0.047520661	0.070491803	0.018595041	0.007377049	0.02892562	0.040983607	0.016528926	0.021311475	0.055785124
YLR175W_YMR225C	0	0	12	13	0	1	506136	721402	507587	720959	483	98	9.5	10.38	54.704	11.476	0.059917355	0.02020202	0.055785124	0.050505051	0.090909091	0.070707071	0.020661157	0.060606061	0.010330579	0.050505051	0.012396694	0	0.134297521	0.121212121	0.026859504	0.050505051	0.099173554	0.060606061	0.074380165	0.050505051	0.035123967	0.050505051	0.07231405	0.080808081	0.047520661	0.060606061	0.018595041	0	0.02892562	0.03030303	0.016528926	0.04040404	0.055785124
YLR175W_YMR236W	0	0	12	13	0	0	506136	742970	507587	743443	483	157	9.5	6.27	54.704	17.315	0.059917355	0.082278481	0.055785124	0.082278481	0.090909091	0.120253165	0.020661157	0.03164557	0.010330579	0.012658228	0.012396694	0.012658228	0.134297521	0.063291139	0.026859504	0.063291139	0.099173554	0.063291139	0.074380165	0.063291139	0.035123967	0.056962025	0.07231405	0.069620253	0.047520661	0.018987342	0.018595041	0.006329114	0.02892562	0.037974684	0.016528926	0.018987342	0.055785124
YLR175W_YNL021W	0	0	12	14	0	0	506136	593228	507587	595348	483	706	9.5	5.24	54.704	80.069	0.059917355	0.062234795	0.055785124	0.045261669	0.090909091	0.082036775	0.020661157	0.022630835	0.010330579	0.03960396	0.012396694	0.014144272	0.134297521	0.062234795	0.026859504	0.026874116	0.099173554	0.074964639	0.074380165	0.073550212	0.035123967	0.050919378	0.07231405	0.069306931	0.047520661	0.077793494	0.018595041	0.01980198	0.02892562	0.038189533	0.016528926	0.028288543	0.055785124
YLR175W_YNL111C	0	0	12	14	0	1	506136	417304	507587	416942	483	120	9.5	4.18	54.704	13.297	0.059917355	0.090909091	0.055785124	0.041322314	0.090909091	0.090909091	0.020661157	0.024793388	0.010330579	0.024793388	0.012396694	0.008264463	0.134297521	0.05785124	0.026859504	0.033057851	0.099173554	0.090909091	0.074380165	0.082644628	0.035123967	0.024793388	0.07231405	0.099173554	0.047520661	0.074380165	0.018595041	0	0.02892562	0.049586777	0.016528926	0.024793388	0.055785124
YLR175W_YNL149C	0	0	12	14	0	1	506136	349758	507587	349369	483	129	9.5	5.51	54.704	15.053	0.059917355	0.038461538	0.055785124	0.092307692	0.090909091	0.1	0.020661157	0.015384615	0.010330579	0.023076923	0.012396694	0.023076923	0.134297521	0.107692308	0.026859504	0.038461538	0.099173554	0.115384615	0.074380165	0.038461538	0.035123967	0.015384615	0.07231405	0.053846154	0.047520661	0.046153846	0.018595041	0	0.02892562	0.023076923	0.016528926	0.007692308	0.055785124
YLR175W_YNL159C	0	0	12	14	0	1	506136	339349	507587	338480	483	289	9.5	10.37	54.704	32.985	0.059917355	0.068965517	0.055785124	0.055172414	0.090909091	0.082758621	0.020661157	0.027586207	0.010330579	0.082758621	0.012396694	0.010344828	0.134297521	0.034482759	0.026859504	0.04137931	0.099173554	0.037931034	0.074380165	0.075862069	0.035123967	0.031034483	0.07231405	0.055172414	0.047520661	0.079310345	0.018595041	0.003448276	0.02892562	0.034482759	0.016528926	0.017241379	0.055785124
YLR175W_YNL168C	0	0	12	14	0	1	506136	318811	507587	318032	483	259	9.5	8.85	54.704	28.792	0.059917355	0.065384615	0.055785124	0.046153846	0.090909091	0.092307692	0.020661157	0.023076923	0.010330579	0.042307692	0.012396694	0.003846154	0.134297521	0.073076923	0.026859504	0.026923077	0.099173554	0.057692308	0.074380165	0.080769231	0.035123967	0.065384615	0.07231405	0.057692308	0.047520661	0.076923077	0.018595041	0.015384615	0.02892562	0.023076923	0.016528926	0.030769231	0.055785124
YLR175W_YNL184C	NA	NA	NA	NA	NA	NA	NA	NA	NA	NA	NA	NA	NA	NA	NA	NA	NA	NA	NA	NA	NA	NA	NA	NA	NA	NA	NA	NA	NA	NA	NA	NA	NA	NA	NA	NA	NA	NA	NA	NA	NA	NA	NA	NA	NA	NA	NA	NA	NA
YLR175W_YNL185C	0	0	12	14	0	1	506136	292671	507587	292195	483	158	9.5	10.68	54.704	16.67	0.059917355	0.100628931	0.055785124	0.094339623	0.090909091	0.081761006	0.020661157	0.037735849	0.010330579	0.025157233	0.012396694	0	0.134297521	0.113207547	0.026859504	0.025157233	0.099173554	0.044025157	0.074380165	0.06918239	0.035123967	0.088050314	0.07231405	0.088050314	0.047520661	0.06918239	0.018595041	0.006289308	0.02892562	0.018867925	0.016528926	0.018867925	0.055785124
YLR175W_YNL217W	0	0	12	14	0	0	506136	240332	507587	241312	483	326	9.5	8.45	54.704	37.151	0.059917355	0.06116208	0.055785124	0.042813456	0.090909091	0.103975535	0.020661157	0.033639144	0.010330579	0.042813456	0.012396694	0.012232416	0.134297521	0.091743119	0.026859504	0.024464832	0.099173554	0.042813456	0.074380165	0.070336391	0.035123967	0.036697248	0.07231405	0.06116208	0.047520661	0.067278287	0.018595041	0.018348624	0.02892562	0.042813456	0.016528926	0.03058104	0.055785124
YLR175W_YNL234W	0	0	12	14	0	0	506136	210234	507587	211514	483	426	9.5	8.78	54.704	47.822	0.059917355	0.046838407	0.055785124	0.032786885	0.090909091	0.093676815	0.020661157	0.039812646	0.010330579	0.032786885	0.012396694	0.004683841	0.134297521	0.081967213	0.026859504	0.035128806	0.099173554	0.042154567	0.074380165	0.110070258	0.035123967	0.056206089	0.07231405	0.051522248	0.047520661	0.06323185	0.018595041	0.009367681	0.02892562	0.030444965	0.016528926	0.028103044	0.055785124
YLR175W_YNL281W	0	0	12	14	0	0	506136	108467	507587	108928	483	153	9.5	4.4	54.704	17.246	0.059917355	0.051948052	0.055785124	0.012987013	0.090909091	0.103896104	0.020661157	0.019480519	0.010330579	0.032467532	0.012396694	0.019480519	0.134297521	0.090909091	0.026859504	0.038961039	0.099173554	0.051948052	0.074380165	0.097402597	0.035123967	0.038961039	0.07231405	0.084415584	0.047520661	0.058441558	0.018595041	0.006493506	0.02892562	0.019480519	0.016528926	0.019480519	0.055785124
YLR175W_YNR045W	0	0	12	14	0	0	506136	706141	507587	707610	483	489	9.5	9.82	54.704	57.487	0.059917355	0.032653061	0.055785124	0.032653061	0.090909091	0.104081633	0.020661157	0.02244898	0.010330579	0.046938776	0.012396694	0.016326531	0.134297521	0.075510204	0.026859504	0.044897959	0.099173554	0.06122449	0.074380165	0.067346939	0.035123967	0.03877551	0.07231405	0.055102041	0.047520661	0.06122449	0.018595041	0.010204082	0.02892562	0.044897959	0.016528926	0.018367347	0.055785124
YLR175W_YNR053C	0	0	12	14	0	1	506136	723113	507587	721122	483	486	9.5	10.29	54.704	55.488	0.059917355	0.063655031	0.055785124	0.055441478	0.090909091	0.082135524	0.020661157	0.012320329	0.010330579	0.032854209	0.012396694	0.016427105	0.134297521	0.108829569	0.026859504	0.041067762	0.099173554	0.078028747	0.074380165	0.063655031	0.035123967	0.047227926	0.07231405	0.061601643	0.047520661	0.061601643	0.018595041	0.01026694	0.02892562	0.024640657	0.016528926	0.020533881	0.055785124
YLR175W_YOL004W	0	0	12	15	0	0	506136	316939	507587	321549	483	1536	9.5	5.42	54.704	174.838	0.059917355	0.038386467	0.055785124	0.055953155	0.090909091	0.079375407	0.020661157	0.015614834	0.010330579	0.039687703	0.012396694	0.009108653	0.134297521	0.068314899	0.026859504	0.075471698	0.099173554	0.07807417	0.074380165	0.085881588	0.035123967	0.063760573	0.07231405	0.044892648	0.047520661	0.061808718	0.018595041	0.005855563	0.02892562	0.031880286	0.016528926	0.03057905	0.055785124
YLR175W_YOL036W	0	0	12	15	0	0	506136	256744	507587	259029	483	761	9.5	9.95	54.704	84.351	0.059917355	0.035433071	0.055785124	0.040682415	0.090909091	0.091863517	0.020661157	0.015748031	0.010330579	0.022309711	0.012396694	0.002624672	0.134297521	0.06167979	0.026859504	0.036745407	0.099173554	0.064304462	0.074380165	0.154855643	0.035123967	0.056430446	0.07231405	0.043307087	0.047520661	0.04855643	0.018595041	0.00656168	0.02892562	0.014435696	0.016528926	0.019685039	0.055785124
YLR175W_YOL052C	0	0	12	15	0	1	506136	233635	507587	232445	483	396	9.5	5.4	54.704	46.232	0.059917355	0.035264484	0.055785124	0.037783375	0.090909091	0.100755668	0.020661157	0.022670025	0.010330579	0.070528967	0.012396694	0.01511335	0.134297521	0.088161209	0.026859504	0.035264484	0.099173554	0.075566751	0.074380165	0.070528967	0.035123967	0.032745592	0.07231405	0.04534005	0.047520661	0.047858942	0.018595041	0.020151134	0.02892562	0.047858942	0.016528926	0.0302267	0.055785124
YLR175W_YOL092W	0	0	12	15	0	0	506136	144204	507587	145130	483	308	9.5	4.61	54.704	34.872	0.059917355	0.055016181	0.055785124	0.045307443	0.090909091	0.122977346	0.020661157	0.025889968	0.010330579	0.071197411	0.012396694	0.022653722	0.134297521	0.029126214	0.026859504	0.042071197	0.099173554	0.038834951	0.074380165	0.087378641	0.035123967	0.051779935	0.07231405	0.077669903	0.047520661	0.097087379	0.018595041	0.01618123	0.02892562	0.038834951	0.016528926	0.009708738	0.055785124
YLR175W_YOR040W	0	0	12	15	0	0	506136	407064	507587	407921	483	285	9.5	7.44	54.704	32.339	0.059917355	0.08041958	0.055785124	0.045454545	0.090909091	0.087412587	0.020661157	0.031468531	0.010330579	0.031468531	0.012396694	0.01048951	0.134297521	0.062937063	0.026859504	0.034965035	0.099173554	0.059440559	0.074380165	0.059440559	0.035123967	0.034965035	0.07231405	0.048951049	0.047520661	0.066433566	0.018595041	0.027972028	0.02892562	0.045454545	0.016528926	0.034965035	0.055785124
YLR175W_YOR044W	0	0	12	15	0	0	506136	413007	507587	413480	483	157	9.5	9.79	54.704	18.092	0.059917355	0.044303797	0.055785124	0.037974684	0.090909091	0.132911392	0.020661157	0.025316456	0.010330579	0.063291139	0.012396694	0	0.134297521	0.037974684	0.026859504	0.03164557	0.099173554	0.03164557	0.074380165	0.113924051	0.035123967	0.018987342	0.07231405	0.044303797	0.047520661	0.088607595	0.018595041	0.018987342	0.02892562	0.056962025	0.016528926	0.03164557	0.055785124
YLR175W_YOR163W	0	0	12	15	0	0	506136	642742	507587	643308	483	188	9.5	8.2	54.704	21.572	0.059917355	0.052910053	0.055785124	0.068783069	0.090909091	0.063492063	0.020661157	0.015873016	0.010330579	0.021164021	0.012396694	0.015873016	0.134297521	0.105820106	0.026859504	0.026455026	0.099173554	0.105820106	0.074380165	0.042328042	0.035123967	0.058201058	0.07231405	0.052910053	0.047520661	0.052910053	0.018595041	0.021164021	0.02892562	0.026455026	0.016528926	0.031746032	0.055785124
YLR175W_YOR167C	0	0	12	15	0	1	506136	649008	507587	648805	483	67	9.5	11.42	54.704	7.592	0.059917355	0.073529412	0.055785124	0.029411765	0.090909091	0.088235294	0.020661157	0.029411765	0.010330579	0.014705882	0.012396694	0	0.134297521	0.058823529	0.026859504	0.014705882	0.099173554	0.088235294	0.074380165	0.044117647	0.035123967	0.029411765	0.07231405	0.147058824	0.047520661	0.044117647	0.018595041	0	0.02892562	0	0.016528926	0	0.055785124
YLR175W_YOR220W	0	0	12	15	0	0	506136	755329	507587	756126	483	265	9.5	7.51	54.704	29.255	0.059917355	0.030075188	0.055785124	0.037593985	0.090909091	0.127819549	0.020661157	0.015037594	0.010330579	0.045112782	0.012396694	0.003759398	0.134297521	0.071428571	0.026859504	0.052631579	0.099173554	0.045112782	0.074380165	0.154135338	0.035123967	0.071428571	0.07231405	0.026315789	0.047520661	0.037593985	0.018595041	0.007518797	0.02892562	0.011278195	0.016528926	0.015037594	0.055785124
YLR175W_YOR360C	0	0	12	15	0	1	506136	1014819	507587	1013239	483	526	9.5	6.6	54.704	60.999	0.059917355	0.024667932	0.055785124	0.04743833	0.090909091	0.115749526	0.020661157	0.018975332	0.010330579	0.058823529	0.012396694	0.015180266	0.134297521	0.060721063	0.026859504	0.04743833	0.099173554	0.058823529	0.074380165	0.077798861	0.035123967	0.034155598	0.07231405	0.049335863	0.047520661	0.079696395	0.018595041	0.020872865	0.02892562	0.024667932	0.016528926	0.04743833	0.055785124
YLR175W_YOR376W-A	NA	NA	NA	NA	NA	NA	NA	NA	NA	NA	NA	NA	NA	NA	NA	NA	NA	NA	NA	NA	NA	NA	NA	NA	NA	NA	NA	NA	NA	NA	NA	NA	NA	NA	NA	NA	NA	NA	NA	NA	NA	NA	NA	NA	NA	NA	NA	NA	NA
YLR175W_YPL144W	0	0	12	16	0	0	506136	280479	507587	280925	483	148	9.5	7.93	54.704	16.573	0.059917355	0.040268456	0.055785124	0.046979866	0.090909091	0.127516779	0.020661157	0.033557047	0.010330579	0.020134228	0.012396694	0.006711409	0.134297521	0.060402685	0.026859504	0.013422819	0.099173554	0.046979866	0.074380165	0.120805369	0.035123967	0.053691275	0.07231405	0.053691275	0.047520661	0.080536913	0.018595041	0.020134228	0.02892562	0.033557047	0.016528926	0.020134228	0.055785124
YLR175W_YPL177C	0	1	12	16	0	1	506136	213961	507587	213041	483	306	9.5	10.15	54.704	34.653	0.059917355	0.022801303	0.055785124	0.058631922	0.090909091	0.071661238	0.020661157	0.016286645	0.010330579	0.022801303	0.012396694	0.006514658	0.134297521	0.071661238	0.026859504	0.045602606	0.099173554	0.055374593	0.074380165	0.120521173	0.035123967	0.058631922	0.07231405	0.042345277	0.047520661	0.052117264	0.018595041	0.009771987	0.02892562	0.045602606	0.016528926	0.019543974	0.055785124
YLR175W_YPR158W	0	0	12	16	0	0	506136	843258	507587	844016	483	252	9.5	5.31	54.704	29.163	0.059917355	0.031620553	0.055785124	0.035573123	0.090909091	0.071146245	0.020661157	0.019762846	0.010330579	0.035573123	0.012396694	0.007905138	0.134297521	0.059288538	0.026859504	0.055335968	0.099173554	0.083003953	0.074380165	0.090909091	0.035123967	0.035573123	0.07231405	0.04743083	0.047520661	0.126482213	0.018595041	0.019762846	0.02892562	0.027667984	0.016528926	0.019762846	0.055785124
YLR175W_YPR203W	0	0	12	16	0	0	506136	943876	507587	944184	483	102	9.5	9.38	54.704	11.766	0.059917355	0.038834951	0.055785124	0.038834951	0.090909091	0.106796117	0.020661157	0.038834951	0.010330579	0.048543689	0.012396694	0	0.134297521	0.087378641	0.026859504	0.029126214	0.099173554	0.038834951	0.074380165	0.077669903	0.035123967	0.058252427	0.07231405	0.058252427	0.047520661	0.058252427	0.018595041	0.038834951	0.02892562	0.038834951	0.016528926	0.029126214	0.055785124
YDR293C_YBR078W	0	0	4	2	1	0	1049389	393118	1045637	394854	1250	468	7.67	4.76	139.953	48.236	0.049560352	0.063965885	0.060751399	0.091684435	0.090327738	0.095948827	0.012789768	0.010660981	0.034372502	0.049040512	0.006394884	0.002132196	0.06314948	0.044776119	0.053557154	0.034115139	0.060751399	0.023454158	0.105515588	0.194029851	0.055955236	0.012793177	0.051159073	0.061833689	0.051159073	0.07249467	0.004796163	0.012793177	0.026378897	0.010660981	0.028776978	0	0.055955236
YDR293C_YBR105C	0	0	4	2	1	1	1049389	451963	1045637	450875	1250	362	7.67	6.74	139.953	41.245	0.049560352	0.038567493	0.060751399	0.052341598	0.090327738	0.082644628	0.012789768	0.013774105	0.034372502	0.055096419	0.006394884	0.008264463	0.06314948	0.066115702	0.053557154	0.066115702	0.060751399	0.055096419	0.105515588	0.099173554	0.055955236	0.066115702	0.051159073	0.052341598	0.051159073	0.035812672	0.004796163	0.011019284	0.026378897	0.049586777	0.028776978	0.03030303	0.055955236
YDR293C_YBR158W	0	0	4	2	1	0	1049389	556543	1045637	558192	1250	549	7.67	9.67	139.953	62.686	0.049560352	0.030909091	0.060751399	0.047272727	0.090327738	0.118181818	0.012789768	0.018181818	0.034372502	0.04	0.006394884	0.014545455	0.06314948	0.078181818	0.053557154	0.036363636	0.060751399	0.063636364	0.105515588	0.090909091	0.055955236	0.054545455	0.051159073	0.065454545	0.051159073	0.056363636	0.004796163	0.021818182	0.026378897	0.016363636	0.028776978	0.027272727	0.055955236
YDR293C_YBR162C	0	0	4	2	1	1	1049389	564565	1045637	563198	1250	455	7.67	4.33	139.953	47.994	0.049560352	0.089912281	0.060751399	0.085526316	0.090327738	0.050438596	0.012789768	0.01754386	0.034372502	0.041666667	0.006394884	0.010964912	0.06314948	0.037280702	0.053557154	0.039473684	0.060751399	0.048245614	0.105515588	0.162280702	0.055955236	0.026315789	0.051159073	0.067982456	0.051159073	0.041666667	0.004796163	0.026315789	0.026378897	0.037280702	0.028776978	0.01754386	0.055955236
YDR293C_YCL051W	0	0	4	3	1	0	1049389	35865	1045637	37616	1250	583	7.67	8.09	139.953	64.791	0.049560352	0.042808219	0.060751399	0.063356164	0.090327738	0.068493151	0.012789768	0.025684932	0.034372502	0.032534247	0.006394884	0.001712329	0.06314948	0.063356164	0.053557154	0.044520548	0.060751399	0.051369863	0.105515588	0.128424658	0.055955236	0.075342466	0.051159073	0.037671233	0.051159073	0.04109589	0.004796163	0.01369863	0.026378897	0.025684932	0.028776978	0.025684932	0.055955236
YDR293C_YDR270W	0	0	4	4	1	0	1049389	1005672	1045637	1008686	1250	1004	7.67	4.89	139.953	109.828	0.049560352	0.068656716	0.060751399	0.062686567	0.090327738	0.089552239	0.012789768	0.025870647	0.034372502	0.044776119	0.006394884	0.008955224	0.06314948	0.059701493	0.053557154	0.021890547	0.060751399	0.061691542	0.105515588	0.08159204	0.055955236	0.028855721	0.051159073	0.082587065	0.051159073	0.095522388	0.004796163	0.027860697	0.026378897	0.025870647	0.028776978	0.011940299	0.055955236
YDR293C_YDR271C	NA	NA	NA	NA	NA	NA	NA	NA	NA	NA	NA	NA	NA	NA	NA	NA	NA	NA	NA	NA	NA	NA	NA	NA	NA	NA	NA	NA	NA	NA	NA	NA	NA	NA	NA	NA	NA	NA	NA	NA	NA	NA	NA	NA	NA	NA	NA	NA	NA
YDR293C_YDR309C	0	0	4	4	1	1	1049389	1080196	1045637	1079045	1250	383	7.67	10.28	139.953	42.852	0.049560352	0.028645833	0.060751399	0.044270833	0.090327738	0.083333333	0.012789768	0.013020833	0.034372502	0.044270833	0.006394884	0.002604167	0.06314948	0.080729167	0.053557154	0.041666667	0.060751399	0.052083333	0.105515588	0.1796875	0.055955236	0.059895833	0.051159073	0.0234375	0.051159073	0.041666667	0.004796163	0.002604167	0.026378897	0.0234375	0.028776978	0.028645833	0.055955236
YDR293C_YDR326C	0	0	4	4	1	1	1049389	1124921	1045637	1120605	1250	1438	7.67	7.47	139.953	160.577	0.049560352	0.047949965	0.060751399	0.038220987	0.090327738	0.067407922	0.012789768	0.014593468	0.034372502	0.045170257	0.006394884	0.006254343	0.06314948	0.078526755	0.053557154	0.030576789	0.060751399	0.047255038	0.105515588	0.122307158	0.055955236	0.04447533	0.051159073	0.046560111	0.051159073	0.073662265	0.004796163	0.004169562	0.026378897	0.020847811	0.028776978	0.027797081	0.055955236
YDR293C_YDR441C	0	0	4	4	1	1	1049389	1345055	1045637	1344510	1250	181	7.67	4.68	139.953	19.986	0.049560352	0.082417582	0.060751399	0.076923077	0.090327738	0.104395604	0.012789768	0.010989011	0.034372502	0.087912088	0.006394884	0	0.06314948	0.054945055	0.053557154	0.027472527	0.060751399	0.093406593	0.105515588	0.054945055	0.055955236	0.043956044	0.051159073	0.071428571	0.051159073	0.087912088	0.004796163	0.005494505	0.026378897	0.016483516	0.028776978	0.032967033	0.055955236
YDR293C_YDR482C	0	0	4	4	1	1	1049389	1420831	1045637	1420424	1250	135	7.67	10.44	139.953	15.762	0.049560352	0.036764706	0.060751399	0.066176471	0.090327738	0.073529412	0.012789768	0.022058824	0.034372502	0	0.006394884	0.007352941	0.06314948	0.080882353	0.053557154	0.117647059	0.060751399	0.125	0.105515588	0.102941176	0.055955236	0.022058824	0.051159073	0.029411765	0.051159073	0.036764706	0.004796163	0.007352941	0.026378897	0.014705882	0.028776978	0.036764706	0.055955236
YDR293C_YER030W	0	0	4	5	1	0	1049389	213436	1045637	213897	1250	153	7.67	4.27	139.953	17.462	0.049560352	0.058441558	0.060751399	0.051948052	0.090327738	0.038961039	0.012789768	0.019480519	0.034372502	0.006493506	0.006394884	0	0.06314948	0.12987013	0.053557154	0.006493506	0.060751399	0.188311688	0.105515588	0.084415584	0.055955236	0.019480519	0.051159073	0.032467532	0.051159073	0.025974026	0.004796163	0	0.026378897	0.025974026	0.028776978	0.006493506	0.055955236
YDR293C_YER138W-A	NA	NA	NA	NA	NA	NA	NA	NA	NA	NA	NA	NA	NA	NA	NA	NA	NA	NA	NA	NA	NA	NA	NA	NA	NA	NA	NA	NA	NA	NA	NA	NA	NA	NA	NA	NA	NA	NA	NA	NA	NA	NA	NA	NA	NA	NA	NA	NA	NA
YDR293C_YFL002C	0	0	4	6	1	1	1049389	146929	1045637	145109	1250	606	7.67	9.77	139.953	69.422	0.049560352	0.042833608	0.060751399	0.05107084	0.090327738	0.105436573	0.012789768	0.024711697	0.034372502	0.05107084	0.006394884	0.009884679	0.06314948	0.097199341	0.053557154	0.02800659	0.060751399	0.074135091	0.105515588	0.067545305	0.055955236	0.039538715	0.051159073	0.072487644	0.051159073	0.059308072	0.004796163	0.009884679	0.026378897	0.026359143	0.028776978	0.009884679	0.055955236
YDR293C_YFR018C	0	0	4	6	1	1	1049389	184210	1045637	183119	1250	363	7.67	5.04	139.953	41.031	0.049560352	0.063186813	0.060751399	0.093406593	0.090327738	0.126373626	0.012789768	0.013736264	0.034372502	0.043956044	0.006394884	0.019230769	0.06314948	0.019230769	0.053557154	0.032967033	0.060751399	0.082417582	0.105515588	0.052197802	0.055955236	0.038461538	0.051159073	0.06043956	0.051159073	0.043956044	0.004796163	0.008241758	0.026378897	0.038461538	0.028776978	0.041208791	0.055955236
YDR293C_YGL112C	0	0	4	7	1	1	1049389	299731	1045637	298181	1250	516	7.67	5.17	139.953	57.901	0.049560352	0.044487427	0.060751399	0.056092843	0.090327738	0.127659574	0.012789768	0.00967118	0.034372502	0.040618956	0.006394884	0.005802708	0.06314948	0.065764023	0.053557154	0.048355899	0.060751399	0.065764023	0.105515588	0.075435203	0.055955236	0.042553191	0.051159073	0.073500967	0.051159073	0.061895551	0.004796163	0.003868472	0.026378897	0.030947776	0.028776978	0.01934236	0.055955236
YDR293C_YGL178W	0	0	4	7	1	0	1049389	167358	1045637	170577	1250	859	7.67	8.02	139.953	95.421	0.049560352	0.034883721	0.060751399	0.055813953	0.090327738	0.089534884	0.012789768	0.025581395	0.034372502	0.055813953	0.006394884	0.001162791	0.06314948	0.047674419	0.053557154	0.059302326	0.060751399	0.029069767	0.105515588	0.122093023	0.055955236	0.051162791	0.051159073	0.044186047	0.051159073	0.070930233	0.004796163	0.011627907	0.026378897	0.024418605	0.028776978	0.029069767	0.055955236
YDR293C_YGR014W	0	0	4	7	1	0	1049389	516947	1045637	520867	1250	1306	7.67	3.9	139.953	133.113	0.049560352	0.037490436	0.060751399	0.078806427	0.090327738	0.052792655	0.012789768	0.013006886	0.034372502	0.030604438	0.006394884	0.004590666	0.06314948	0.012241775	0.053557154	0.052027544	0.060751399	0.033664881	0.105515588	0.289977047	0.055955236	0.045906656	0.051159073	0.068859985	0.051159073	0.04055088	0.004796163	0.001530222	0.026378897	0.025248661	0.028776978	0.006120888	0.055955236
YDR293C_YGR122C-A	NA	NA	NA	NA	NA	NA	NA	NA	NA	NA	NA	NA	NA	NA	NA	NA	NA	NA	NA	NA	NA	NA	NA	NA	NA	NA	NA	NA	NA	NA	NA	NA	NA	NA	NA	NA	NA	NA	NA	NA	NA	NA	NA	NA	NA	NA	NA	NA	NA
YDR293C_YGR258C	0	0	4	7	1	1	1049389	1010772	1045637	1007677	1250	1031	7.67	4.92	139.953	117.837	0.049560352	0.049418605	0.060751399	0.04748062	0.090327738	0.080426357	0.012789768	0.024224806	0.034372502	0.046511628	0.006394884	0.009689922	0.06314948	0.093992248	0.053557154	0.043604651	0.060751399	0.096899225	0.105515588	0.083333333	0.055955236	0.039728682	0.051159073	0.049418605	0.051159073	0.055232558	0.004796163	0.003875969	0.026378897	0.022286822	0.028776978	0.009689922	0.055955236
YDR293C_YGR267C	0	0	4	7	1	1	1049389	1025741	1045637	1025010	1250	243	7.67	7.23	139.953	27.769	0.049560352	0.06147541	0.060751399	0.053278689	0.090327738	0.090163934	0.012789768	0.040983607	0.034372502	0.028688525	0.006394884	0.004098361	0.06314948	0.053278689	0.053557154	0.040983607	0.060751399	0.098360656	0.105515588	0.053278689	0.055955236	0.040983607	0.051159073	0.069672131	0.051159073	0.077868852	0.004796163	0.012295082	0.026378897	0.028688525	0.028776978	0.032786885	0.055955236
YDR293C_YGR279C	0	0	4	7	1	1	1049389	1049965	1045637	1048805	1250	386	7.67	4.52	139.953	40.173	0.049560352	0.062015504	0.060751399	0.142118863	0.090327738	0.043927649	0.012789768	0.005167959	0.034372502	0.023255814	0.006394884	0.015503876	0.06314948	0.046511628	0.053557154	0.043927649	0.060751399	0.043927649	0.105515588	0.147286822	0.055955236	0.028423773	0.051159073	0.093023256	0.051159073	0.041343669	0.004796163	0.012919897	0.026378897	0.03875969	0.028776978	0.007751938	0.055955236
YDR293C_YGR282C	0	0	4	7	1	1	1049389	1058731	1045637	1057790	1250	313	7.67	4.16	139.953	34.118	0.049560352	0.066878981	0.060751399	0.098726115	0.090327738	0.057324841	0.012789768	0.015923567	0.034372502	0.057324841	0.006394884	0.02866242	0.06314948	0.050955414	0.053557154	0.041401274	0.060751399	0.047770701	0.105515588	0.114649682	0.055955236	0.01910828	0.051159073	0.079617834	0.051159073	0.035031847	0.004796163	0.012738854	0.026378897	0.038216561	0.028776978	0.006369427	0.055955236
YDR293C_YHL034C	0	0	4	8	1	1	1049389	34075	1045637	33191	1250	294	7.67	5.45	139.953	32.989	0.049560352	0.111864407	0.060751399	0.057627119	0.090327738	0.027118644	0.012789768	0.020338983	0.034372502	0.06779661	0.006394884	0	0.06314948	0.06779661	0.053557154	0.033898305	0.060751399	0.111864407	0.105515588	0.040677966	0.055955236	0.037288136	0.051159073	0.057627119	0.051159073	0.06440678	0.004796163	0.003389831	0.026378897	0.010169492	0.028776978	0.023728814	0.055955236
YDR293C_YHR143W	0	0	4	8	1	0	1049389	385513	1045637	386490	1250	325	7.67	4.2	139.953	33.417	0.049560352	0.024539877	0.060751399	0.067484663	0.090327738	0.052147239	0.012789768	0.006134969	0.034372502	0.036809816	0.006394884	0	0.06314948	0.018404908	0.053557154	0.024539877	0.060751399	0.033742331	0.105515588	0.297546012	0.055955236	0.030674847	0.051159073	0.070552147	0.051159073	0.058282209	0.004796163	0.003067485	0.026378897	0.036809816	0.028776978	0	0.055955236
YDR293C_YIL123W	0	0	4	9	1	0	1049389	128151	1045637	129578	1250	475	7.67	4.31	139.953	48.07	0.049560352	0.094537815	0.060751399	0.100840336	0.090327738	0.037815126	0.012789768	0.006302521	0.034372502	0.016806723	0.006394884	0.014705882	0.06314948	0.035714286	0.053557154	0.023109244	0.060751399	0.042016807	0.105515588	0.210084034	0.055955236	0.035714286	0.051159073	0.079831933	0.051159073	0.039915966	0.004796163	0.021008403	0.026378897	0.039915966	0.028776978	0.012605042	0.055955236
YDR293C_YJL158C	0	0	4	10	1	1	1049389	122944	1045637	122261	1250	227	7.67	4.34	139.953	23.241	0.049560352	0.074561404	0.060751399	0.149122807	0.090327738	0.061403509	0.012789768	0.004385965	0.034372502	0.026315789	0.006394884	0.00877193	0.06314948	0.039473684	0.053557154	0.061403509	0.060751399	0.035087719	0.105515588	0.135964912	0.055955236	0.035087719	0.051159073	0.048245614	0.051159073	0.048245614	0.004796163	0.026315789	0.026378897	0.030701754	0.028776978	0.004385965	0.055955236
YDR293C_YJR110W	0	0	4	10	1	0	1049389	633605	1045637	635671	1250	688	7.67	7.58	139.953	80.151	0.049560352	0.047895501	0.060751399	0.021770682	0.090327738	0.108853411	0.012789768	0.015965167	0.034372502	0.059506531	0.006394884	0.018867925	0.06314948	0.071117562	0.053557154	0.044992743	0.060751399	0.052249637	0.105515588	0.084179971	0.055955236	0.034833091	0.051159073	0.052249637	0.051159073	0.056603774	0.004796163	0.014513788	0.026378897	0.033381713	0.028776978	0.031930334	0.055955236
YDR293C_YKL101W	0	0	4	11	1	0	1049389	248564	1045637	253120	1250	1518	7.67	10.12	139.953	169.591	0.049560352	0.03357472	0.060751399	0.051349572	0.090327738	0.084265964	0.012789768	0.020408163	0.034372502	0.02764977	0.006394884	0.004608295	0.06314948	0.092165899	0.053557154	0.034891376	0.060751399	0.069124424	0.105515588	0.141540487	0.055955236	0.051349572	0.051159073	0.053324556	0.051159073	0.053324556	0.004796163	0.004608295	0.026378897	0.020408163	0.028776978	0.026333114	0.055955236
YDR293C_YKR013W	0	0	4	11	1	0	1049389	463602	1045637	464591	1250	329	7.67	4.31	139.953	33.779	0.049560352	0.063636364	0.060751399	0.118181818	0.090327738	0.039393939	0.012789768	0.009090909	0.034372502	0.024242424	0.006394884	0.012121212	0.06314948	0.024242424	0.053557154	0.045454545	0.060751399	0.042424242	0.105515588	0.142424242	0.055955236	0.036363636	0.051159073	0.084848485	0.051159073	0.03030303	0.004796163	0.012121212	0.026378897	0.03030303	0.028776978	0.018181818	0.055955236
YDR293C_YKR042W	0	0	4	11	1	0	1049389	519169	1045637	520266	1250	365	7.67	4.45	139.953	36.955	0.049560352	0.112021858	0.060751399	0.117486339	0.090327738	0.038251366	0.012789768	0.010928962	0.034372502	0.013661202	0.006394884	0.016393443	0.06314948	0.032786885	0.053557154	0.030054645	0.060751399	0.027322404	0.105515588	0.155737705	0.055955236	0.035519126	0.051159073	0.090163934	0.051159073	0.035519126	0.004796163	0.027322404	0.026378897	0.046448087	0.028776978	0.013661202	0.055955236
YDR293C_YKR091W	0	0	4	11	1	0	1049389	611167	1045637	611907	1250	246	7.67	8.63	139.953	27.465	0.049560352	0.012145749	0.060751399	0.064777328	0.090327738	0.076923077	0.012789768	0.016194332	0.034372502	0.036437247	0.006394884	0.008097166	0.06314948	0.072874494	0.053557154	0.028340081	0.060751399	0.072874494	0.105515588	0.141700405	0.055955236	0.089068826	0.051159073	0.052631579	0.051159073	0.036437247	0.004796163	0.008097166	0.026378897	0.016194332	0.028776978	0.028340081	0.055955236
YDR293C_YLR065C	0	0	4	12	1	1	1049389	266919	1045637	266374	1250	181	7.67	11.04	139.953	20.741	0.049560352	0.082417582	0.060751399	0.065934066	0.090327738	0.098901099	0.012789768	0.032967033	0.034372502	0.054945055	0.006394884	0.016483516	0.06314948	0.104395604	0.053557154	0.054945055	0.060751399	0.016483516	0.105515588	0.06043956	0.055955236	0.021978022	0.051159073	0.049450549	0.051159073	0.087912088	0.004796163	0.010989011	0.026378897	0.054945055	0.028776978	0	0.055955236
YDR293C_YLR190W	0	0	4	12	1	0	1049389	535216	1045637	536691	1250	491	7.67	7.66	139.953	54.816	0.049560352	0.040650407	0.060751399	0.040650407	0.090327738	0.103658537	0.012789768	0.022357724	0.034372502	0.024390244	0.006394884	0.00203252	0.06314948	0.091463415	0.053557154	0.052845528	0.060751399	0.089430894	0.105515588	0.117886179	0.055955236	0.058943089	0.051159073	0.048780488	0.051159073	0.036585366	0.004796163	0.012195122	0.026378897	0.014227642	0.028776978	0.008130081	0.055955236
YDR293C_YLR285C-A	NA	NA	NA	NA	NA	NA	NA	NA	NA	NA	NA	NA	NA	NA	NA	NA	NA	NA	NA	NA	NA	NA	NA	NA	NA	NA	NA	NA	NA	NA	NA	NA	NA	NA	NA	NA	NA	NA	NA	NA	NA	NA	NA	NA	NA	NA	NA	NA	NA
YDR293C_YLR286C	0	0	4	12	1	1	1049389	710138	1045637	708450	1250	562	7.67	4.22	139.953	59.014	0.049560352	0.056838366	0.060751399	0.103019538	0.090327738	0.090586146	0.012789768	0.005328597	0.034372502	0.044404973	0.006394884	0.010657194	0.06314948	0.039076377	0.053557154	0.044404973	0.060751399	0.037300178	0.105515588	0.1669627	0.055955236	0.024866785	0.051159073	0.03374778	0.051159073	0.040852575	0.004796163	0.021314387	0.026378897	0.035523979	0.028776978	0.003552398	0.055955236
YDR293C_YML014W	0	0	4	13	1	0	1049389	243225	1045637	244064	1250	279	7.67	8.51	139.953	32.438	0.049560352	0.064285714	0.060751399	0.053571429	0.090327738	0.060714286	0.012789768	0.014285714	0.034372502	0.021428571	0.006394884	0.025	0.06314948	0.075	0.053557154	0.064285714	0.060751399	0.092857143	0.105515588	0.060714286	0.055955236	0.057142857	0.051159073	0.067857143	0.051159073	0.053571429	0.004796163	0.014285714	0.026378897	0.046428571	0.028776978	0.032142857	0.055955236
YDR293C_YMR046W-A	NA	NA	NA	NA	NA	NA	NA	NA	NA	NA	NA	NA	NA	NA	NA	NA	NA	NA	NA	NA	NA	NA	NA	NA	NA	NA	NA	NA	NA	NA	NA	NA	NA	NA	NA	NA	NA	NA	NA	NA	NA	NA	NA	NA	NA	NA	NA	NA	NA
YDR293C_YMR158C-A	0	0	4	13	1	1	1049389	573330	1045637	573193	1250	45	7.67	4.5	139.953	5.28	0.049560352	0.02173913	0.060751399	0.02173913	0.090327738	0.130434783	0.012789768	0.108695652	0.034372502	0	0.006394884	0.02173913	0.06314948	0.065217391	0.053557154	0.02173913	0.060751399	0.065217391	0.105515588	0.130434783	0.055955236	0	0.051159073	0.02173913	0.051159073	0.043478261	0.004796163	0.02173913	0.026378897	0.065217391	0.028776978	0.02173913	0.055955236
YDR293C_YMR305C	0	0	4	13	1	1	1049389	880231	1045637	879062	1250	389	7.67	4.32	139.953	40.469	0.049560352	0.071794872	0.060751399	0.105128205	0.090327738	0.048717949	0.012789768	0.005128205	0.034372502	0.020512821	0.006394884	0.012820513	0.06314948	0.041025641	0.053557154	0.043589744	0.060751399	0.043589744	0.105515588	0.161538462	0.055955236	0.023076923	0.051159073	0.102564103	0.051159073	0.038461538	0.004796163	0.012820513	0.026378897	0.041025641	0.028776978	0.01025641	0.055955236
YDR293C_YNL032W	0	0	4	14	1	0	1049389	574507	1045637	575352	1250	281	7.67	5.37	139.953	32.755	0.049560352	0.04964539	0.060751399	0.028368794	0.090327738	0.102836879	0.012789768	0.017730496	0.034372502	0.046099291	0.006394884	0.010638298	0.06314948	0.078014184	0.053557154	0.039007092	0.060751399	0.09929078	0.105515588	0.056737589	0.055955236	0.046099291	0.051159073	0.039007092	0.051159073	0.095744681	0.004796163	0.010638298	0.026378897	0.024822695	0.028776978	0.035460993	0.055955236
YDR293C_YNL066W	0	0	4	14	1	0	1049389	501516	1045637	502778	1250	420	7.67	4.02	139.953	43.442	0.049560352	0.097387173	0.060751399	0.083135392	0.090327738	0.049881235	0.012789768	0.007125891	0.034372502	0.016627078	0.006394884	0.016627078	0.06314948	0.03087886	0.053557154	0.03087886	0.060751399	0.042755344	0.105515588	0.16152019	0.055955236	0.038004751	0.051159073	0.076009501	0.051159073	0.040380048	0.004796163	0.026128266	0.026378897	0.049881235	0.028776978	0.007125891	0.055955236
YDR293C_YNL239W	0	0	4	14	1	0	1049389	200570	1045637	201934	1250	454	7.67	7.97	139.953	52.088	0.049560352	0.03956044	0.060751399	0.052747253	0.090327738	0.116483516	0.012789768	0.024175824	0.034372502	0.041758242	0.006394884	0.015384615	0.06314948	0.083516484	0.053557154	0.043956044	0.060751399	0.054945055	0.105515588	0.076923077	0.055955236	0.043956044	0.051159073	0.057142857	0.051159073	0.052747253	0.004796163	0.006593407	0.026378897	0.043956044	0.028776978	0.015384615	0.055955236
YDR293C_YNL283C	0	0	4	14	1	1	1049389	106695	1045637	105184	1250	503	7.67	6.95	139.953	52.292	0.049560352	0.049603175	0.060751399	0.071428571	0.090327738	0.049603175	0.012789768	0.007936508	0.034372502	0.01984127	0.006394884	0.007936508	0.06314948	0.033730159	0.053557154	0.037698413	0.060751399	0.01984127	0.105515588	0.244047619	0.055955236	0.031746032	0.051159073	0.061507937	0.051159073	0.033730159	0.004796163	0.017857143	0.026378897	0.035714286	0.028776978	0.017857143	0.055955236
YDR293C_YNL300W	0	0	4	14	1	0	1049389	65744	1045637	66052	1250	102	7.67	7.52	139.953	10.17	0.049560352	0.058252427	0.060751399	0.155339806	0.090327738	0.038834951	0.012789768	0.038834951	0.034372502	0.029126214	0.006394884	0	0.06314948	0.038834951	0.053557154	0.019417476	0.060751399	0.009708738	0.105515588	0.155339806	0.055955236	0.019417476	0.051159073	0.087378641	0.051159073	0.048543689	0.004796163	0	0.026378897	0.029126214	0.028776978	0.009708738	0.055955236
YDR293C_YOL114C	0	0	4	15	1	1	1049389	103925	1045637	103317	1250	202	7.67	10.88	139.953	23.19	0.049560352	0.054187192	0.060751399	0.039408867	0.090327738	0.088669951	0.012789768	0.014778325	0.034372502	0.044334975	0.006394884	0.014778325	0.06314948	0.133004926	0.053557154	0.054187192	0.060751399	0.049261084	0.105515588	0.078817734	0.055955236	0.02955665	0.051159073	0.0591133	0.051159073	0.049261084	0.004796163	0.024630542	0.026378897	0.019704433	0.028776978	0.009852217	0.055955236
YDR293C_YOR036W	0	0	4	15	1	0	1049389	400348	1045637	401214	1250	288	7.67	4.67	139.953	33.006	0.049560352	0.041522491	0.060751399	0.062283737	0.090327738	0.083044983	0.012789768	0.024221453	0.034372502	0.048442907	0.006394884	0.006920415	0.06314948	0.062283737	0.053557154	0.079584775	0.060751399	0.107266436	0.105515588	0.079584775	0.055955236	0.010380623	0.051159073	0.07266436	0.051159073	0.083044983	0.004796163	0	0.026378897	0.017301038	0.028776978	0	0.055955236
YDR293C_YOR097C	0	0	4	15	1	1	1049389	507506	1045637	506979	1250	175	7.67	10.06	139.953	19.4	0.049560352	0.090909091	0.060751399	0.022727273	0.090327738	0.068181818	0.012789768	0.034090909	0.034372502	0.045454545	0.006394884	0.011363636	0.06314948	0.085227273	0.053557154	0.005681818	0.060751399	0.045454545	0.105515588	0.090909091	0.055955236	0.0625	0.051159073	0.073863636	0.051159073	0.090909091	0.004796163	0.017045455	0.026378897	0.034090909	0.028776978	0.011363636	0.055955236
YDR293C_YOR132W	0	0	4	15	1	0	1049389	573176	1045637	574831	1250	551	7.67	6.92	139.953	63.203	0.049560352	0.039855072	0.060751399	0.065217391	0.090327738	0.081521739	0.012789768	0.019927536	0.034372502	0.038043478	0.006394884	0.010869565	0.06314948	0.072463768	0.053557154	0.054347826	0.060751399	0.086956522	0.105515588	0.085144928	0.055955236	0.03442029	0.051159073	0.041666667	0.051159073	0.05615942	0.004796163	0.001811594	0.026378897	0.030797101	0.028776978	0.012681159	0.055955236
YDR293C_YOR247W	0	0	4	15	1	0	1049389	797677	1045637	798309	1250	210	7.67	4.11	139.953	22.048	0.049560352	0.018957346	0.060751399	0.066350711	0.090327738	0.052132701	0.012789768	0.004739336	0.034372502	0.037914692	0.006394884	0.014218009	0.06314948	0.018957346	0.053557154	0.028436019	0.060751399	0.028436019	0.105515588	0.194312796	0.055955236	0.042654028	0.051159073	0.09478673	0.051159073	0.033175355	0.004796163	0.004739336	0.026378897	0.033175355	0.028776978	0.009478673	0.055955236
YDR293C_YOR248W	NA	NA	NA	NA	NA	NA	NA	NA	NA	NA	NA	NA	NA	NA	NA	NA	NA	NA	NA	NA	NA	NA	NA	NA	NA	NA	NA	NA	NA	NA	NA	NA	NA	NA	NA	NA	NA	NA	NA	NA	NA	NA	NA	NA	NA	NA	NA	NA	NA
YDR293C_YOR383C	0	0	4	15	1	1	1049389	1061053	1045637	1060439	1250	204	7.67	4.02	139.953	19.836	0.049560352	0.058536585	0.060751399	0.209756098	0.090327738	0.03902439	0.012789768	0.014634146	0.034372502	0.014634146	0.006394884	0.014634146	0.06314948	0.024390244	0.053557154	0.009756098	0.060751399	0.058536585	0.105515588	0.195121951	0.055955236	0.004878049	0.051159073	0.043902439	0.051159073	0.024390244	0.004796163	0	0.026378897	0.019512195	0.028776978	0.009756098	0.055955236
YDR293C_YPL076W	0	0	4	16	1	0	1049389	410440	1045637	411282	1250	280	7.67	10.24	139.953	32.577	0.049560352	0.007117438	0.060751399	0.042704626	0.090327738	0.131672598	0.012789768	0.014234875	0.034372502	0.067615658	0.006394884	0.03202847	0.06314948	0.056939502	0.053557154	0.021352313	0.060751399	0.014234875	0.105515588	0.113879004	0.055955236	0.046263345	0.051159073	0.053380783	0.051159073	0.117437722	0.004796163	0.007117438	0.026378897	0.053380783	0.028776978	0.003558719	0.055955236
YDR293C_YPL246C	0	0	4	16	1	1	1049389	85297	1045637	84509	1250	262	7.67	7.52	139.953	29.499	0.049560352	0.072243346	0.060751399	0.064638783	0.090327738	0.159695817	0.012789768	0.011406844	0.034372502	0.064638783	0.006394884	0.02661597	0.06314948	0.038022814	0.053557154	0.007604563	0.060751399	0.041825095	0.105515588	0.068441065	0.055955236	0.068441065	0.051159073	0.049429658	0.051159073	0.072243346	0.004796163	0.011406844	0.026378897	0.057034221	0.028776978	0.022813688	0.055955236
YDR293C_YPL256C	0	0	4	16	1	1	1049389	66614	1045637	64977	1250	545	7.67	5.68	139.953	61.696	0.049560352	0.043956044	0.060751399	0.032967033	0.090327738	0.086080586	0.012789768	0.032967033	0.034372502	0.038461538	0.006394884	0.007326007	0.06314948	0.042124542	0.053557154	0.056776557	0.060751399	0.064102564	0.105515588	0.10989011	0.055955236	0.054945055	0.051159073	0.054945055	0.051159073	0.071428571	0.004796163	0.016483516	0.026378897	0.038461538	0.028776978	0.021978022	0.055955236
YDR293C_YPL268W	0	0	4	16	1	0	1049389	35236	1045637	37845	1250	869	7.67	9.84	139.953	100.547	0.049560352	0.03908046	0.060751399	0.036781609	0.090327738	0.096551724	0.012789768	0.02183908	0.034372502	0.054022989	0.006394884	0.010344828	0.06314948	0.083908046	0.053557154	0.044827586	0.060751399	0.06091954	0.105515588	0.088505747	0.055955236	0.037931034	0.051159073	0.049425287	0.051159073	0.079310345	0.004796163	0.014942529	0.026378897	0.032183908	0.028776978	0.028735632	0.055955236
YDR293C_YPL269W	0	0	4	16	1	0	1049389	33013	1045637	34947	1250	644	7.67	9.16	139.953	74.244	0.049560352	0.024806202	0.060751399	0.027906977	0.090327738	0.113178295	0.012789768	0.015503876	0.034372502	0.040310078	0.006394884	0.009302326	0.06314948	0.093023256	0.053557154	0.034108527	0.060751399	0.074418605	0.105515588	0.080620155	0.055955236	0.060465116	0.051159073	0.040310078	0.051159073	0.080620155	0.004796163	0.004651163	0.026378897	0.021705426	0.028776978	0.018604651	0.055955236
YDR293C_YPR139C	0	0	4	16	1	1	1049389	814054	1045637	813152	1250	300	7.67	10.5	139.953	33.816	0.049560352	0.063122924	0.060751399	0.03654485	0.090327738	0.119601329	0.012789768	0.026578073	0.034372502	0.043189369	0.006394884	0.006644518	0.06314948	0.112956811	0.053557154	0.029900332	0.060751399	0.049833887	0.105515588	0.059800664	0.055955236	0.043189369	0.051159073	0.063122924	0.051159073	0.083056478	0.004796163	0.016611296	0.026378897	0.029900332	0.028776978	0.006644518	0.055955236
YPL184C_YAL021C	0	0	16	1	1	1	197787	113360	195949	110847	612	837	5.74	6.84	68.663	94.669	0.057096248	0.052505967	0.070146819	0.060859189	0.061990212	0.109785203	0.017944535	0.026252983	0.057096248	0.047732697	0.003262643	0.011933174	0.044045677	0.062052506	0.052202284	0.072792363	0.053833605	0.04176611	0.073409462	0.065632458	0.052202284	0.054892601	0.060358891	0.040572792	0.070146819	0.040572792	0.014681892	0.010739857	0.039151713	0.031026253	0.016313214	0.031026253	0.04730832
YPL184C_YAL040C	0	0	16	1	1	1	197787	67521	195949	65779	612	580	5.74	9.78	68.663	64.99	0.057096248	0.012048193	0.070146819	0.072289157	0.061990212	0.122203098	0.017944535	0.020654045	0.057096248	0.053356282	0.003262643	0.008605852	0.044045677	0.058519793	0.052202284	0.04130809	0.053833605	0.027538726	0.073409462	0.158347676	0.052202284	0.048192771	0.060358891	0.018932874	0.070146819	0.055077453	0.014681892	0.018932874	0.039151713	0.036144578	0.016313214	0.020654045	0.04730832
YPL184C_YAL053W	0	0	16	1	1	0	197787	45900	195949	48251	612	783	5.74	7.78	68.663	87.462	0.057096248	0.038265306	0.070146819	0.080357143	0.061990212	0.108418367	0.017944535	0.019132653	0.057096248	0.079081633	0.003262643	0.011479592	0.044045677	0.044642857	0.052202284	0.038265306	0.053833605	0.029336735	0.073409462	0.091836735	0.052202284	0.034438776	0.060358891	0.080357143	0.070146819	0.066326531	0.014681892	0.011479592	0.039151713	0.034438776	0.016313214	0.006377551	0.04730832
YPL184C_YAL054C	0	0	16	1	1	1	197787	45023	195949	42882	612	713	5.74	6.6	68.663	79.14	0.057096248	0.070028011	0.070146819	0.078431373	0.061990212	0.081232493	0.017944535	0.011204482	0.057096248	0.036414566	0.003262643	0.016806723	0.044045677	0.065826331	0.052202284	0.030812325	0.053833605	0.053221289	0.073409462	0.071428571	0.052202284	0.056022409	0.060358891	0.077030812	0.070146819	0.06162465	0.014681892	0.009803922	0.039151713	0.043417367	0.016313214	0.028011204	0.04730832
YPL184C_YAL060W	0	0	16	1	1	0	197787	35156	195949	36304	612	382	5.74	6.64	68.663	41.538	0.057096248	0.093994778	0.070146819	0.065274151	0.061990212	0.070496084	0.017944535	0.028720627	0.057096248	0.036553525	0.003262643	0.01305483	0.044045677	0.080939948	0.052202284	0.026109661	0.053833605	0.065274151	0.073409462	0.067885117	0.052202284	0.049608355	0.060358891	0.093994778	0.070146819	0.07310705	0.014681892	0.028720627	0.039151713	0.015665796	0.016313214	0.044386423	0.04730832
YPL184C_YAR002W	0	0	16	1	1	0	197787	152259	195949	153878	612	539	5.74	10.16	68.663	59.039	0.057096248	0.037037037	0.070146819	0.074074074	0.061990212	0.046296296	0.017944535	0.011111111	0.057096248	0.042592593	0.003262643	0	0.044045677	0.096296296	0.052202284	0.033333333	0.053833605	0.075925926	0.073409462	0.161111111	0.052202284	0.064814815	0.060358891	0.057407407	0.070146819	0.042592593	0.014681892	0	0.039151713	0.027777778	0.016313214	0.011111111	0.04730832
YPL184C_YBL023C	0	0	16	2	1	1	197787	177529	195949	174923	612	868	5.74	4.87	68.663	98.779	0.057096248	0.052934407	0.070146819	0.059838895	0.061990212	0.084004603	0.017944535	0.020713464	0.057096248	0.0287687	0.003262643	0.003452244	0.044045677	0.043728423	0.052202284	0.036823936	0.053833605	0.098964327	0.073409462	0.078250863	0.052202284	0.041426928	0.060358891	0.067894131	0.070146819	0.063291139	0.014681892	0.010356732	0.039151713	0.029919448	0.016313214	0.019562716	0.04730832
YPL184C_YBL102W	0	0	16	2	1	0	197787	24098	195949	24745	612	215	5.74	8.98	68.663	24.274	0.057096248	0.046296296	0.070146819	0.087962963	0.061990212	0.138888889	0.017944535	0.032407407	0.057096248	0.092592593	0.003262643	0.018518519	0.044045677	0.023148148	0.052202284	0.050925926	0.053833605	0.032407407	0.073409462	0.087962963	0.052202284	0.041666667	0.060358891	0.060185185	0.070146819	0.027777778	0.014681892	0.023148148	0.039151713	0.027777778	0.016313214	0.00462963	0.04730832
YPL184C_YBR005W	0	0	16	2	1	0	197787	245908	195949	246549	612	213	5.74	6.69	68.663	23.886	0.057096248	0.056074766	0.070146819	0.079439252	0.061990212	0.060747664	0.017944535	0.009345794	0.057096248	0.028037383	0.003262643	0.014018692	0.044045677	0.023364486	0.052202284	0.056074766	0.053833605	0.065420561	0.073409462	0.08411215	0.052202284	0.074766355	0.060358891	0.08411215	0.070146819	0.042056075	0.014681892	0.004672897	0.039151713	0.051401869	0.016313214	0.023364486	0.04730832
YPL184C_YBR015C	0	0	16	2	1	1	197787	269503	195949	267710	612	597	5.74	6.18	68.663	67.773	0.057096248	0.058528428	0.070146819	0.056856187	0.061990212	0.100334448	0.017944535	0.016722408	0.057096248	0.056856187	0.003262643	0.006688963	0.044045677	0.095317726	0.052202284	0.015050167	0.053833605	0.056856187	0.073409462	0.071906355	0.052202284	0.04180602	0.060358891	0.055183946	0.070146819	0.048494983	0.014681892	0.011705686	0.039151713	0.060200669	0.016313214	0.018394649	0.04730832
YPL184C_YBR022W	0	0	16	2	1	0	197787	283738	195949	284271	612	177	5.74	7.64	68.663	19.938	0.057096248	0.08988764	0.070146819	0.033707865	0.061990212	0.106741573	0.017944535	0.016853933	0.057096248	0.033707865	0.003262643	0.011235955	0.044045677	0.08988764	0.052202284	0.02247191	0.053833605	0.073033708	0.073409462	0.095505618	0.052202284	0.033707865	0.060358891	0.033707865	0.070146819	0.073033708	0.014681892	0.033707865	0.039151713	0.06741573	0.016313214	0.016853933	0.04730832
YPL184C_YBR029C	0	0	16	2	1	1	197787	297742	195949	296369	612	457	5.74	8.64	68.663	51.822	0.057096248	0.052401747	0.070146819	0.052401747	0.061990212	0.11790393	0.017944535	0.015283843	0.057096248	0.098253275	0.003262643	0.010917031	0.044045677	0.072052402	0.052202284	0.019650655	0.053833605	0.041484716	0.073409462	0.065502183	0.052202284	0.034934498	0.060358891	0.063318777	0.070146819	0.087336245	0.014681892	0.026200873	0.039151713	0.032751092	0.016313214	0.026200873	0.04730832
YPL184C_YBR037C	0	0	16	2	1	1	197787	311451	195949	310564	612	295	5.74	9.8	68.663	33.166	0.057096248	0.087837838	0.070146819	0.057432432	0.061990212	0.111486486	0.017944535	0.010135135	0.057096248	0.067567568	0.003262643	0.010135135	0.044045677	0.084459459	0.052202284	0.030405405	0.053833605	0.057432432	0.073409462	0.067567568	0.052202284	0.057432432	0.060358891	0.054054054	0.070146819	0.037162162	0.014681892	0.013513514	0.039151713	0.043918919	0.016313214	0.013513514	0.04730832
YPL184C_YBR046C	0	0	16	2	1	1	197787	331509	195949	330505	612	334	5.74	9.46	68.663	37.018	0.057096248	0.080597015	0.070146819	0.074626866	0.061990212	0.095522388	0.017944535	0.008955224	0.057096248	0.03880597	0.003262643	0.002985075	0.044045677	0.101492537	0.052202284	0.029850746	0.053833605	0.068656716	0.073409462	0.068656716	0.052202284	0.041791045	0.060358891	0.074626866	0.070146819	0.074626866	0.014681892	0.005970149	0.039151713	0.065671642	0.016313214	0.005970149	0.04730832
YPL184C_YBR054W	0	0	16	2	1	0	197787	343099	195949	344133	612	344	5.74	9.94	68.663	38.719	0.057096248	0.063768116	0.070146819	0.07826087	0.061990212	0.086956522	0.017944535	0.031884058	0.057096248	0.063768116	0.003262643	0.023188406	0.044045677	0.089855072	0.052202284	0.020289855	0.053833605	0.043478261	0.073409462	0.060869565	0.052202284	0.052173913	0.060358891	0.069565217	0.070146819	0.084057971	0.014681892	0.014492754	0.039151713	0.04057971	0.016313214	0.017391304	0.04730832
YPL184C_YBR067C	0	0	16	2	1	1	197787	372732	195949	372100	612	210	5.74	4.02	68.663	20.727	0.057096248	0.037914692	0.070146819	0.199052133	0.061990212	0.071090047	0.017944535	0.009478673	0.057096248	0.023696682	0.003262643	0.004739336	0.044045677	0.023696682	0.052202284	0.023696682	0.053833605	0.047393365	0.073409462	0.232227488	0.052202284	0.033175355	0.060358891	0.071090047	0.070146819	0.042654028	0.014681892	0	0.039151713	0.023696682	0.016313214	0.004739336	0.04730832
YPL184C_YBR068C	0	0	16	2	1	1	197787	375687	195949	373858	612	609	5.74	8.11	68.663	67.67	0.057096248	0.080327869	0.070146819	0.081967213	0.061990212	0.08852459	0.017944535	0.027868852	0.057096248	0.073770492	0.003262643	0.014754098	0.044045677	0.049180328	0.052202284	0.026229508	0.053833605	0.040983607	0.073409462	0.090163934	0.052202284	0.031147541	0.060358891	0.062295082	0.070146819	0.085245902	0.014681892	0.016393443	0.039151713	0.047540984	0.016313214	0.018032787	0.04730832
YPL184C_YBR071W	0	0	16	2	1	0	197787	380408	195949	381043	612	211	5.74	8.43	68.663	23.548	0.057096248	0.023584906	0.070146819	0.051886792	0.061990212	0.094339623	0.017944535	0.033018868	0.057096248	0.037735849	0.003262643	0	0.044045677	0.08490566	0.052202284	0.033018868	0.053833605	0.056603774	0.073409462	0.198113208	0.052202284	0.018867925	0.060358891	0.004716981	0.070146819	0.04245283	0.014681892	0.004716981	0.039151713	0.014150943	0.016313214	0.033018868	0.04730832
YPL184C_YBR074W	0	0	16	2	1	0	197787	386281	195949	389211	612	976	5.74	6.52	68.663	111.067	0.057096248	0.046059365	0.070146819	0.047082907	0.061990212	0.115660184	0.017944535	0.017400205	0.057096248	0.057318321	0.003262643	0.013306039	0.044045677	0.052200614	0.052202284	0.036847492	0.053833605	0.052200614	0.073409462	0.107471853	0.052202284	0.035823951	0.060358891	0.054247697	0.070146819	0.068577277	0.014681892	0.009211873	0.039151713	0.045035824	0.016313214	0.026612078	0.04730832
YPL184C_YBR078W	0	0	16	2	1	0	197787	393118	195949	394854	612	468	5.74	4.76	68.663	48.236	0.057096248	0.063965885	0.070146819	0.091684435	0.061990212	0.095948827	0.017944535	0.010660981	0.057096248	0.049040512	0.003262643	0.002132196	0.044045677	0.044776119	0.052202284	0.034115139	0.053833605	0.023454158	0.073409462	0.194029851	0.052202284	0.012793177	0.060358891	0.061833689	0.070146819	0.07249467	0.014681892	0.012793177	0.039151713	0.010660981	0.016313214	0	0.04730832
YPL184C_YBR089C-A	0	0	16	2	1	1	197787	426483	195949	426184	612	99	5.74	10.8	68.663	11.575	0.057096248	0.03	0.070146819	0.12	0.061990212	0.04	0.017944535	0.02	0.057096248	0.03	0.003262643	0.01	0.044045677	0.14	0.052202284	0.04	0.053833605	0.11	0.073409462	0.04	0.052202284	0.06	0.060358891	0.03	0.070146819	0.02	0.014681892	0	0.039151713	0.04	0.016313214	0	0.04730832
YPL184C_YBR090C	0	0	16	2	1	1	197787	427052	195949	426327	612	122	5.74	11.81	68.663	14.307	0.057096248	0.06504065	0.070146819	0.040650407	0.061990212	0.113821138	0.017944535	0.016260163	0.057096248	0.081300813	0.003262643	0.032520325	0.044045677	0.06504065	0.052202284	0.073170732	0.053833605	0.032520325	0.073409462	0.040650407	0.052202284	0.081300813	0.060358891	0.056910569	0.070146819	0.032520325	0.014681892	0.016260163	0.039151713	0.024390244	0.016313214	0	0.04730832
YPL184C_YBR092C	0	0	16	2	1	1	197787	429095	195949	427692	612	467	5.74	4.27	68.663	52.776	0.057096248	0.066239316	0.070146819	0.074786325	0.061990212	0.083333333	0.017944535	0.021367521	0.057096248	0.05982906	0.003262643	0.014957265	0.044045677	0.044871795	0.052202284	0.034188034	0.053833605	0.053418803	0.073409462	0.064102564	0.052202284	0.02991453	0.060358891	0.053418803	0.070146819	0.040598291	0.014681892	0.017094017	0.039151713	0.064102564	0.016313214	0.012820513	0.04730832
YPL184C_YBR096W	0	0	16	2	1	0	197787	436015	195949	436707	612	230	5.74	8.48	68.663	27.092	0.057096248	0.038961039	0.070146819	0.034632035	0.061990212	0.103896104	0.017944535	0.021645022	0.057096248	0.077922078	0.003262643	0.012987013	0.044045677	0.095238095	0.052202284	0.017316017	0.053833605	0.069264069	0.073409462	0.082251082	0.052202284	0.034632035	0.060358891	0.047619048	0.070146819	0.060606061	0.014681892	0.038961039	0.039151713	0.082251082	0.016313214	0.012987013	0.04730832
YPL184C_YBR139W	0	0	16	2	1	0	197787	515658	195949	517184	612	508	5.74	5.02	68.663	57.638	0.057096248	0.072691552	0.070146819	0.053045187	0.061990212	0.098231827	0.017944535	0.023575639	0.057096248	0.05697446	0.003262643	0.017681729	0.044045677	0.047151277	0.052202284	0.031434185	0.053833605	0.053045187	0.073409462	0.080550098	0.052202284	0.05108055	0.060358891	0.043222004	0.070146819	0.053045187	0.014681892	0.021611002	0.039151713	0.05697446	0.016313214	0.023575639	0.04730832
YPL184C_YBR150C	0	0	16	2	1	1	197787	544487	195949	541203	612	1094	5.74	5.15	68.663	126.902	0.057096248	0.025570776	0.070146819	0.042009132	0.061990212	0.102283105	0.017944535	0.02283105	0.057096248	0.056621005	0.003262643	0.006392694	0.044045677	0.073972603	0.052202284	0.024657534	0.053833605	0.071232877	0.073409462	0.085844749	0.052202284	0.03196347	0.060358891	0.048401826	0.070146819	0.052054795	0.014681892	0.017351598	0.039151713	0.037442922	0.016313214	0.026484018	0.04730832
YPL184C_YBR158W	0	0	16	2	1	0	197787	556543	195949	558192	612	549	5.74	9.67	68.663	62.686	0.057096248	0.030909091	0.070146819	0.047272727	0.061990212	0.118181818	0.017944535	0.018181818	0.057096248	0.04	0.003262643	0.014545455	0.044045677	0.078181818	0.052202284	0.036363636	0.053833605	0.063636364	0.073409462	0.090909091	0.052202284	0.054545455	0.060358891	0.065454545	0.070146819	0.056363636	0.014681892	0.021818182	0.039151713	0.016363636	0.016313214	0.027272727	0.04730832
YPL184C_YBR162C	0	0	16	2	1	1	197787	564565	195949	563198	612	455	5.74	4.33	68.663	47.994	0.057096248	0.089912281	0.070146819	0.085526316	0.061990212	0.050438596	0.017944535	0.01754386	0.057096248	0.041666667	0.003262643	0.010964912	0.044045677	0.037280702	0.052202284	0.039473684	0.053833605	0.048245614	0.073409462	0.162280702	0.052202284	0.026315789	0.060358891	0.067982456	0.070146819	0.041666667	0.014681892	0.026315789	0.039151713	0.037280702	0.016313214	0.01754386	0.04730832
YPL184C_YBR187W	0	0	16	2	1	0	197787	602629	195949	603471	612	280	5.74	5.21	68.663	30.34	0.057096248	0.071174377	0.070146819	0.128113879	0.061990212	0.103202847	0.017944535	0.060498221	0.057096248	0.060498221	0.003262643	0.007117438	0.044045677	0.049822064	0.052202284	0.021352313	0.053833605	0.056939502	0.073409462	0.09252669	0.052202284	0.007117438	0.060358891	0.06405694	0.070146819	0.088967972	0.014681892	0.003558719	0.039151713	0.024911032	0.016313214	0.017793594	0.04730832
YPL184C_YBR202W	0	0	16	2	1	0	197787	625767	195949	628304	612	845	5.74	5	68.663	94.874	0.057096248	0.044917258	0.070146819	0.063829787	0.061990212	0.105200946	0.017944535	0.029550827	0.057096248	0.03427896	0.003262643	0.001182033	0.044045677	0.060283688	0.052202284	0.048463357	0.053833605	0.06501182	0.073409462	0.070921986	0.052202284	0.042553191	0.060358891	0.067375887	0.070146819	0.062647754	0.014681892	0.014184397	0.039151713	0.028368794	0.016313214	0.011820331	0.04730832
YPL184C_YBR210W	0	0	16	2	1	0	197787	645545	195949	645973	612	142	5.74	8.04	68.663	16.347	0.057096248	0.048951049	0.070146819	0.062937063	0.061990212	0.174825175	0.017944535	0.013986014	0.057096248	0.097902098	0.003262643	0.006993007	0.044045677	0.048951049	0.052202284	0.013986014	0.053833605	0.034965035	0.073409462	0.055944056	0.052202284	0.013986014	0.060358891	0.055944056	0.070146819	0.083916084	0.014681892	0.034965035	0.039151713	0.062937063	0.016313214	0.006993007	0.04730832
YPL184C_YBR212W	0	0	16	2	1	0	197787	647881	195949	649899	612	672	5.74	8.23	68.663	75.023	0.057096248	0.050520059	0.070146819	0.053491828	0.061990212	0.078751857	0.017944535	0.043090639	0.057096248	0.040118871	0.003262643	0.007429421	0.044045677	0.037147103	0.052202284	0.077265973	0.053833605	0.038632987	0.073409462	0.108469539	0.052202284	0.069836553	0.060358891	0.037147103	0.070146819	0.043090639	0.014681892	0.005943536	0.039151713	0.026745914	0.016313214	0.020802377	0.04730832
YPL184C_YBR214W	0	0	16	2	1	0	197787	651410	195949	652993	612	527	5.74	9.45	68.663	57.187	0.057096248	0.041666667	0.070146819	0.068181818	0.061990212	0.096590909	0.017944535	0.024621212	0.057096248	0.024621212	0.003262643	0.005681818	0.044045677	0.053030303	0.052202284	0.045454545	0.053833605	0.045454545	0.073409462	0.128787879	0.052202284	0.083333333	0.060358891	0.060606061	0.070146819	0.058712121	0.014681892	0.011363636	0.039151713	0.017045455	0.016313214	0.026515152	0.04730832
YPL184C_YBR230C	0	0	16	2	1	1	197787	680045	195949	679544	612	134	5.74	8.94	68.663	14.609	0.057096248	0.051851852	0.070146819	0.111111111	0.061990212	0.118518519	0.017944535	0.007407407	0.057096248	0.02962963	0.003262643	0	0.044045677	0.088888889	0.052202284	0.022222222	0.053833605	0.02962963	0.073409462	0.096296296	0.052202284	0.022222222	0.060358891	0.066666667	0.070146819	0.022222222	0.014681892	0.037037037	0.039151713	0.051851852	0.016313214	0.044444444	0.04730832
YPL184C_YBR238C	0	0	16	2	1	1	197787	697297	195949	695102	612	731	5.74	7.52	68.663	83.761	0.057096248	0.034153005	0.070146819	0.06557377	0.061990212	0.083333333	0.017944535	0.028688525	0.057096248	0.043715847	0.003262643	0.012295082	0.044045677	0.050546448	0.052202284	0.047814208	0.053833605	0.043715847	0.073409462	0.080601093	0.052202284	0.050546448	0.060358891	0.045081967	0.070146819	0.06147541	0.014681892	0.010928962	0.039151713	0.043715847	0.016313214	0.050546448	0.04730832
YPL184C_YBR243C	0	0	16	2	1	1	197787	706788	195949	705442	612	448	5.74	8.4	68.663	50.367	0.057096248	0.071269488	0.070146819	0.064587973	0.061990212	0.144766147	0.017944535	0.033407572	0.057096248	0.069042316	0.003262643	0.017817372	0.044045677	0.046770601	0.052202284	0.011135857	0.053833605	0.028953229	0.073409462	0.053452116	0.052202284	0.055679287	0.060358891	0.069042316	0.070146819	0.091314031	0.014681892	0.022271715	0.039151713	0.042316258	0.016313214	0.022271715	0.04730832
YPL184C_YBR283C	0	0	16	2	1	1	197787	770411	195949	768939	612	490	5.74	8.18	68.663	53.311	0.057096248	0.085539715	0.070146819	0.073319756	0.061990212	0.122199593	0.017944535	0.010183299	0.057096248	0.071283096	0.003262643	0.00407332	0.044045677	0.044806517	0.052202284	0.044806517	0.053833605	0.036659878	0.073409462	0.054989817	0.052202284	0.044806517	0.060358891	0.085539715	0.070146819	0.114052953	0.014681892	0.00814664	0.039151713	0.028513238	0.016313214	0.00814664	0.04730832
YPL184C_YBR287W	0	0	16	2	1	0	197787	776567	195949	777850	612	427	5.74	4.64	68.663	47.506	0.057096248	0.046728972	0.070146819	0.060747664	0.061990212	0.130841121	0.017944535	0.025700935	0.057096248	0.060747664	0.003262643	0.018691589	0.044045677	0.03271028	0.052202284	0.044392523	0.053833605	0.056074766	0.073409462	0.10046729	0.052202284	0.051401869	0.060358891	0.077102804	0.070146819	0.10046729	0.014681892	0.007009346	0.039151713	0.021028037	0.016313214	0.009345794	0.04730832
YPL184C_YCL025C	0	0	16	3	1	1	197787	77919	195949	76018	612	633	5.74	6.95	68.663	69.671	0.057096248	0.088328076	0.070146819	0.099369085	0.061990212	0.094637224	0.017944535	0.023659306	0.057096248	0.063091483	0.003262643	0.018927445	0.044045677	0.042586751	0.052202284	0.036277603	0.053833605	0.045741325	0.073409462	0.074132492	0.052202284	0.033123028	0.060358891	0.059936909	0.070146819	0.082018927	0.014681892	0.017350158	0.039151713	0.039432177	0.016313214	0.020504732	0.04730832
YPL184C_YCR021C	0	0	16	3	1	1	197787	157103	195949	156105	612	332	5.74	4.96	68.663	37.044	0.057096248	0.075075075	0.070146819	0.087087087	0.061990212	0.111111111	0.017944535	0.021021021	0.057096248	0.075075075	0.003262643	0.027027027	0.044045677	0.03003003	0.052202284	0.024024024	0.053833605	0.054054054	0.073409462	0.063063063	0.052202284	0.039039039	0.060358891	0.072072072	0.070146819	0.066066066	0.014681892	0.024024024	0.039151713	0.036036036	0.016313214	0.024024024	0.04730832
YPL184C_YCR024C-A	0	0	16	3	1	1	197787	163063	195949	162941	612	40	5.74	12.09	68.663	4.501	0.057096248	0.097560976	0.070146819	0.097560976	0.061990212	0.12195122	0.017944535	0.024390244	0.057096248	0.048780488	0.003262643	0.024390244	0.044045677	0.024390244	0.052202284	0.073170732	0.053833605	0	0.073409462	0	0.052202284	0.024390244	0.060358891	0.073170732	0.070146819	0.170731707	0.014681892	0.024390244	0.039151713	0.024390244	0.016313214	0	0.04730832
YPL184C_YCR024C-B	NA	NA	NA	NA	NA	NA	NA	NA	NA	NA	NA	NA	NA	NA	NA	NA	NA	NA	NA	NA	NA	NA	NA	NA	NA	NA	NA	NA	NA	NA	NA	NA	NA	NA	NA	NA	NA	NA	NA	NA	NA	NA	NA	NA	NA	NA	NA	NA	NA
YPL184C_YCR034W	0	0	16	3	1	0	197787	190588	195949	191631	612	347	5.74	10.35	68.663	40.002	0.057096248	0.051724138	0.070146819	0.054597701	0.061990212	0.123563218	0.017944535	0.014367816	0.057096248	0.074712644	0.003262643	0.020114943	0.044045677	0.048850575	0.052202284	0.034482759	0.053833605	0.025862069	0.073409462	0.051724138	0.052202284	0.054597701	0.060358891	0.094827586	0.070146819	0.068965517	0.014681892	0.014367816	0.039151713	0.063218391	0.016313214	0.037356322	0.04730832
YPL184C_YCR061W	0	0	16	3	1	0	197787	225559	195949	227454	612	631	5.74	6.06	68.663	70.921	0.057096248	0.050632911	0.070146819	0.07278481	0.061990212	0.117088608	0.017944535	0.034810127	0.057096248	0.077531646	0.003262643	0.02056962	0.044045677	0.025316456	0.052202284	0.022151899	0.053833605	0.036392405	0.073409462	0.087025316	0.052202284	0.045886076	0.060358891	0.060126582	0.070146819	0.055379747	0.014681892	0.012658228	0.039151713	0.033227848	0.016313214	0.026898734	0.04730832
YPL184C_YCR077C	0	0	16	3	1	1	197787	252625	195949	250235	612	796	5.74	8.02	68.663	88.495	0.057096248	0.063989962	0.070146819	0.062735257	0.061990212	0.095357591	0.017944535	0.031367629	0.057096248	0.037641154	0.003262643	0.005018821	0.044045677	0.058971142	0.052202284	0.075282309	0.053833605	0.055207026	0.073409462	0.095357591	0.052202284	0.067754078	0.060358891	0.038895859	0.070146819	0.069008783	0.014681892	0	0.039151713	0.026348808	0.016313214	0.013801757	0.04730832
YPL184C_YCR084C	0	0	16	3	1	1	197787	262449	195949	260308	612	713	5.74	5.47	68.663	78.307	0.057096248	0.047619048	0.070146819	0.071428571	0.061990212	0.084033613	0.017944535	0.011204482	0.057096248	0.018207283	0.003262643	0.008403361	0.044045677	0.050420168	0.052202284	0.085434174	0.053833605	0.050420168	0.073409462	0.098039216	0.052202284	0.050420168	0.060358891	0.067226891	0.070146819	0.037815126	0.014681892	0.009803922	0.039151713	0.028011204	0.016313214	0.019607843	0.04730832
YPL184C_YDL027C	0	0	16	4	1	1	197787	404955	195949	403693	612	420	5.74	10.73	68.663	48.312	0.057096248	0.038004751	0.070146819	0.033254157	0.061990212	0.097387173	0.017944535	0.021377672	0.057096248	0.095011876	0.003262643	0.007125891	0.044045677	0.106888361	0.052202284	0.028503563	0.053833605	0.047505938	0.073409462	0.116389549	0.052202284	0.045130641	0.060358891	0.049881235	0.070146819	0.078384798	0.014681892	0.007125891	0.039151713	0.03087886	0.016313214	0.011876485	0.04730832
YPL184C_YDL046W	0	0	16	4	1	0	197787	371237	195949	371758	612	173	5.74	4.18	68.663	19.063	0.057096248	0.068965517	0.070146819	0.057471264	0.061990212	0.109195402	0.017944535	0.005747126	0.057096248	0.034482759	0.003262643	0	0.044045677	0.045977011	0.052202284	0.017241379	0.053833605	0.103448276	0.073409462	0.028735632	0.052202284	0.086206897	0.060358891	0.08045977	0.070146819	0.091954023	0.014681892	0.022988506	0.039151713	0.040229885	0.016313214	0.005747126	0.04730832
YPL184C_YDL047W	0	0	16	4	1	0	197787	369769	195949	370704	612	311	5.74	5.17	68.663	35.537	0.057096248	0.070512821	0.070146819	0.051282051	0.061990212	0.092948718	0.017944535	0.025641026	0.057096248	0.051282051	0.003262643	0.019230769	0.044045677	0.048076923	0.052202284	0.041666667	0.053833605	0.073717949	0.073409462	0.048076923	0.052202284	0.041666667	0.060358891	0.083333333	0.070146819	0.048076923	0.014681892	0.032051282	0.039151713	0.044871795	0.016313214	0.028846154	0.04730832
YPL184C_YDL053C	0	0	16	4	1	1	197787	362256	195949	361699	612	185	5.74	11.15	68.663	19.881	0.057096248	0.053763441	0.070146819	0.107526882	0.061990212	0.048387097	0.017944535	0.016129032	0.057096248	0.010752688	0.003262643	0.010752688	0.044045677	0.112903226	0.052202284	0.075268817	0.053833605	0.021505376	0.073409462	0.129032258	0.052202284	0.053763441	0.060358891	0.048387097	0.070146819	0.016129032	0.014681892	0.005376344	0.039151713	0.02688172	0.016313214	0.010752688	0.04730832
YPL184C_YDL128W	0	0	16	4	1	0	197787	232652	195949	233887	612	411	5.74	5.54	68.663	44.646	0.057096248	0.063106796	0.070146819	0.094660194	0.061990212	0.152912621	0.017944535	0.029126214	0.057096248	0.063106796	0.003262643	0.009708738	0.044045677	0.029126214	0.052202284	0.029126214	0.053833605	0.038834951	0.073409462	0.075242718	0.052202284	0.031553398	0.060358891	0.080097087	0.070146819	0.082524272	0.014681892	0.007281553	0.039151713	0.02184466	0.016313214	0.026699029	0.04730832
YPL184C_YDL129W	0	0	16	4	1	0	197787	231024	195949	231899	612	291	5.74	10.28	68.663	32.916	0.057096248	0.034246575	0.070146819	0.054794521	0.061990212	0.113013699	0.017944535	0.010273973	0.057096248	0.017123288	0.003262643	0.006849315	0.044045677	0.095890411	0.052202284	0.017123288	0.053833605	0.106164384	0.073409462	0.109589041	0.052202284	0.068493151	0.060358891	0.051369863	0.070146819	0.020547945	0.014681892	0	0.039151713	0.023972603	0.016313214	0.01369863	0.04730832
YPL184C_YDL160C	0	0	16	4	1	1	197787	171931	195949	170411	612	506	5.74	7.97	68.663	57.544	0.057096248	0.047337278	0.070146819	0.057199211	0.061990212	0.096646943	0.017944535	0.025641026	0.057096248	0.049309665	0.003262643	0.003944773	0.044045677	0.059171598	0.052202284	0.08086785	0.053833605	0.055226824	0.073409462	0.047337278	0.052202284	0.067061144	0.060358891	0.051282051	0.070146819	0.071005917	0.014681892	0.013806706	0.039151713	0.027613412	0.016313214	0.029585799	0.04730832
YPL184C_YDL188C	0	0	16	4	1	1	197787	124999	195949	123866	612	377	5.74	4.48	68.663	43.047	0.057096248	0.066137566	0.070146819	0.034391534	0.061990212	0.076719577	0.017944535	0.031746032	0.057096248	0.044973545	0.003262643	0.013227513	0.044045677	0.03968254	0.052202284	0.044973545	0.053833605	0.063492063	0.073409462	0.060846561	0.052202284	0.055555556	0.060358891	0.063492063	0.070146819	0.05026455	0.014681892	0.023809524	0.039151713	0.03968254	0.016313214	0.034391534	0.04730832
YPL184C_YDL205C	0	0	16	4	1	1	197787	93746	195949	92763	612	327	5.74	6.33	68.663	36.674	0.057096248	0.076219512	0.070146819	0.048780488	0.061990212	0.118902439	0.017944535	0.036585366	0.057096248	0.021341463	0.003262643	0.00304878	0.044045677	0.091463415	0.052202284	0.030487805	0.053833605	0.076219512	0.073409462	0.054878049	0.052202284	0.039634146	0.060358891	0.051829268	0.070146819	0.076219512	0.014681892	0.024390244	0.039151713	0.030487805	0.016313214	0.024390244	0.04730832
YPL184C_YDL232W	0	0	16	4	1	0	197787	38488	195949	38598	612	36	5.74	4.41	68.663	3.985	0.057096248	0.027027027	0.070146819	0.054054054	0.061990212	0.081081081	0.017944535	0.108108108	0.057096248	0.027027027	0.003262643	0	0.044045677	0.027027027	0.052202284	0.027027027	0.053833605	0.027027027	0.073409462	0.108108108	0.052202284	0.027027027	0.060358891	0.081081081	0.070146819	0.135135135	0.014681892	0	0.039151713	0.027027027	0.016313214	0.027027027	0.04730832
YPL184C_YDR033W	0	0	16	4	1	0	197787	508145	195949	509107	612	320	5.74	9.85	68.663	36.19	0.057096248	0.065420561	0.070146819	0.074766355	0.061990212	0.074766355	0.017944535	0.031152648	0.057096248	0.087227414	0.003262643	0.028037383	0.044045677	0.07165109	0.052202284	0.021806854	0.053833605	0.021806854	0.073409462	0.062305296	0.052202284	0.059190031	0.060358891	0.049844237	0.070146819	0.090342679	0.014681892	0.031152648	0.039151713	0.040498442	0.016313214	0.018691589	0.04730832
YPL184C_YDR039C	0	0	16	4	1	1	197787	534580	195949	531305	612	1091	5.74	5.28	68.663	120.316	0.057096248	0.066849817	0.070146819	0.073260073	0.061990212	0.081501832	0.017944535	0.026556777	0.057096248	0.047619048	0.003262643	0.014652015	0.044045677	0.057692308	0.052202284	0.025641026	0.053833605	0.055860806	0.073409462	0.082417582	0.052202284	0.034798535	0.060358891	0.07967033	0.070146819	0.075091575	0.014681892	0.014652015	0.039151713	0.022893773	0.016313214	0.018315018	0.04730832
YPL184C_YDR040C	0	0	16	4	1	1	197787	538465	195949	535190	612	1091	5.74	5.32	68.663	120.356	0.057096248	0.067765568	0.070146819	0.072344322	0.061990212	0.081501832	0.017944535	0.027472527	0.057096248	0.048534799	0.003262643	0.014652015	0.044045677	0.057692308	0.052202284	0.025641026	0.053833605	0.054945055	0.073409462	0.080586081	0.052202284	0.034798535	0.060358891	0.077838828	0.070146819	0.076007326	0.014681892	0.014652015	0.039151713	0.022893773	0.016313214	0.02014652	0.04730832
YPL184C_YDR055W	0	0	16	4	1	0	197787	563526	195949	564860	612	444	5.74	9.91	68.663	45.776	0.057096248	0.06741573	0.070146819	0.080898876	0.061990212	0.105617978	0.017944535	0.008988764	0.057096248	0.040449438	0.003262643	0.002247191	0.044045677	0.074157303	0.052202284	0.031460674	0.053833605	0.017977528	0.073409462	0.195505618	0.052202284	0.011235955	0.060358891	0.053932584	0.070146819	0.074157303	0.014681892	0.008988764	0.039151713	0.006741573	0.016313214	0.006741573	0.04730832
YPL184C_YDR072C	0	0	16	4	1	1	197787	591343	195949	589760	612	527	5.74	7.92	68.663	60.873	0.057096248	0.049242424	0.070146819	0.054924242	0.061990212	0.102272727	0.017944535	0.020833333	0.057096248	0.106060606	0.003262643	0.026515152	0.044045677	0.045454545	0.052202284	0.024621212	0.053833605	0.03030303	0.073409462	0.077651515	0.052202284	0.051136364	0.060358891	0.053030303	0.070146819	0.079545455	0.014681892	0.009469697	0.039151713	0.035984848	0.016313214	0.035984848	0.04730832
YPL184C_YDR075W	0	0	16	4	1	0	197787	597154	195949	598080	612	308	5.74	4.77	68.663	35.264	0.057096248	0.074433657	0.070146819	0.038834951	0.061990212	0.103559871	0.017944535	0.025889968	0.057096248	0.048543689	0.003262643	0.012944984	0.044045677	0.045307443	0.052202284	0.03236246	0.053833605	0.071197411	0.073409462	0.045307443	0.052202284	0.029126214	0.060358891	0.077669903	0.070146819	0.061488673	0.014681892	0.029126214	0.039151713	0.045307443	0.016313214	0.022653722	0.04730832
YPL184C_YDR077W	0	0	16	4	1	0	197787	600791	195949	601807	612	338	5.74	3.81	68.663	34.431	0.057096248	0.04719764	0.070146819	0.07079646	0.061990212	0.044247788	0.017944535	0.005899705	0.057096248	0.014749263	0.003262643	0	0.044045677	0.02359882	0.052202284	0.005899705	0.053833605	0.064896755	0.073409462	0.123893805	0.052202284	0.097345133	0.060358891	0.064896755	0.070146819	0.026548673	0.014681892	0.017699115	0.039151713	0.029498525	0.016313214	0.002949853	0.04730832
YPL184C_YDR084C	0	0	16	4	1	1	197787	614002	195949	613403	612	199	5.74	8.88	68.663	23.148	0.057096248	0.045	0.070146819	0.05	0.061990212	0.115	0.017944535	0.02	0.057096248	0.09	0.003262643	0.04	0.044045677	0.04	0.052202284	0.045	0.053833605	0.015	0.073409462	0.075	0.052202284	0.05	0.060358891	0.065	0.070146819	0.065	0.014681892	0.02	0.039151713	0.045	0.016313214	0.01	0.04730832
YPL184C_YDR089W	0	0	16	4	1	0	197787	622110	195949	624719	612	869	5.74	5.24	68.663	98.711	0.057096248	0.033333333	0.070146819	0.035632184	0.061990212	0.122988506	0.017944535	0.013793103	0.057096248	0.049425287	0.003262643	0.005747126	0.044045677	0.062068966	0.052202284	0.036781609	0.053833605	0.062068966	0.073409462	0.116091954	0.052202284	0.032183908	0.060358891	0.042528736	0.070146819	0.087356322	0.014681892	0.016091954	0.039151713	0.025287356	0.016313214	0.018390805	0.04730832
YPL184C_YDR100W	0	0	16	4	1	0	197787	655011	195949	655442	612	143	5.74	4.17	68.663	15.881	0.057096248	0.069444444	0.070146819	0.069444444	0.061990212	0.118055556	0.017944535	0.020833333	0.057096248	0.111111111	0.003262643	0	0.044045677	0.020833333	0.052202284	0.013888889	0.053833605	0.020833333	0.073409462	0.097222222	0.052202284	0.041666667	0.060358891	0.0625	0.070146819	0.131944444	0.014681892	0.006944444	0.039151713	0.055555556	0.016313214	0.006944444	0.04730832
YPL184C_YDR123C	0	1	16	4	1	1	197787	699466	195949	698552	612	304	5.74	6.23	68.663	34.234	0.057096248	0.032786885	0.070146819	0.052459016	0.061990212	0.081967213	0.017944535	0.029508197	0.057096248	0.026229508	0.003262643	0.003278689	0.044045677	0.042622951	0.052202284	0.049180328	0.053833605	0.06557377	0.073409462	0.08852459	0.052202284	0.085245902	0.060358891	0.032786885	0.070146819	0.072131148	0.014681892	0.003278689	0.039151713	0.016393443	0.016313214	0.068852459	0.04730832
YPL184C_YDR133C	NA	NA	NA	NA	NA	NA	NA	NA	NA	NA	NA	NA	NA	NA	NA	NA	NA	NA	NA	NA	NA	NA	NA	NA	NA	NA	NA	NA	NA	NA	NA	NA	NA	NA	NA	NA	NA	NA	NA	NA	NA	NA	NA	NA	NA	NA	NA	NA	NA
YPL184C_YDR143C	0	0	16	4	1	1	197787	743872	195949	742040	612	610	5.74	4.93	68.663	65.618	0.057096248	0.068739771	0.070146819	0.065466448	0.061990212	0.052373159	0.017944535	0.004909984	0.057096248	0.027823241	0.003262643	0.003273322	0.044045677	0.022913257	0.052202284	0.050736498	0.053833605	0.058919804	0.073409462	0.130932897	0.052202284	0.073649755	0.060358891	0.042553191	0.070146819	0.032733224	0.014681892	0.009819967	0.039151713	0.01309329	0.016313214	0.021276596	0.04730832
YPL184C_YDR151C	0	0	16	4	1	1	197787	765153	195949	764176	612	325	5.74	8.83	68.663	36.772	0.057096248	0.033742331	0.070146819	0.036809816	0.061990212	0.098159509	0.017944535	0.009202454	0.057096248	0.024539877	0.003262643	0.009202454	0.044045677	0.09202454	0.052202284	0.027607362	0.053833605	0.055214724	0.073409462	0.098159509	0.052202284	0.076687117	0.060358891	0.018404908	0.070146819	0.052147239	0.014681892	0.027607362	0.039151713	0.049079755	0.016313214	0.015337423	0.04730832
YPL184C_YDR169C	0	0	16	4	1	1	197787	793887	195949	792346	612	513	5.74	7.53	68.663	56.264	0.057096248	0.03307393	0.070146819	0.06614786	0.061990212	0.06614786	0.017944535	0.015564202	0.057096248	0.025291829	0.003262643	0.005836576	0.044045677	0.06614786	0.052202284	0.044747082	0.053833605	0.06614786	0.073409462	0.153696498	0.052202284	0.068093385	0.060358891	0.048638132	0.070146819	0.052529183	0.014681892	0.003891051	0.039151713	0.009727626	0.016313214	0.031128405	0.04730832
YPL184C_YDR178W	0	0	16	4	1	0	197787	817948	195949	818493	612	181	5.74	9.59	68.663	20.248	0.057096248	0.071428571	0.070146819	0.065934066	0.061990212	0.093406593	0.017944535	0.054945055	0.057096248	0.049450549	0.003262643	0.016483516	0.044045677	0.071428571	0.052202284	0.016483516	0.053833605	0.049450549	0.073409462	0.087912088	0.052202284	0.06043956	0.060358891	0.071428571	0.070146819	0.038461538	0.014681892	0.010989011	0.039151713	0.054945055	0.016313214	0.016483516	0.04730832
YPL184C_YDR222W	0	0	16	4	1	0	197787	910051	195949	911298	612	415	5.74	8.41	68.663	47.414	0.057096248	0.057692308	0.070146819	0.019230769	0.061990212	0.079326923	0.017944535	0.019230769	0.057096248	0.0625	0.003262643	0.012019231	0.044045677	0.088942308	0.052202284	0.040865385	0.053833605	0.048076923	0.073409462	0.100961538	0.052202284	0.038461538	0.060358891	0.072115385	0.070146819	0.064903846	0.014681892	0.019230769	0.039151713	0.043269231	0.016313214	0.019230769	0.04730832
YPL184C_YDR233C	0	0	16	4	1	1	197787	930354	195949	929467	612	295	5.74	9.64	68.663	32.916	0.057096248	0.037162162	0.070146819	0.077702703	0.061990212	0.097972973	0.017944535	0.010135135	0.057096248	0.064189189	0.003262643	0.010135135	0.044045677	0.097972973	0.052202284	0.074324324	0.053833605	0.057432432	0.073409462	0.084459459	0.052202284	0.054054054	0.060358891	0.067567568	0.070146819	0.054054054	0.014681892	0.013513514	0.039151713	0.023648649	0.016313214	0.027027027	0.04730832
YPL184C_YDR247W	0	0	16	4	1	0	197787	956010	195949	957395	612	461	5.74	6.88	68.663	52.136	0.057096248	0.047619048	0.070146819	0.023809524	0.061990212	0.095238095	0.017944535	0.023809524	0.057096248	0.041125541	0.003262643	0.004329004	0.044045677	0.084415584	0.052202284	0.019480519	0.053833605	0.058441558	0.073409462	0.121212121	0.052202284	0.036796537	0.060358891	0.060606061	0.070146819	0.064935065	0.014681892	0.025974026	0.039151713	0.045454545	0.016313214	0.032467532	0.04730832
YPL184C_YDR264C	0	0	16	4	1	1	197787	998320	195949	996026	612	764	5.74	5.53	68.663	85.839	0.057096248	0.066666667	0.070146819	0.05751634	0.061990212	0.11372549	0.017944535	0.018300654	0.057096248	0.064052288	0.003262643	0.019607843	0.044045677	0.052287582	0.052202284	0.02745098	0.053833605	0.052287582	0.073409462	0.065359477	0.052202284	0.040522876	0.060358891	0.069281046	0.070146819	0.064052288	0.014681892	0.015686275	0.039151713	0.02875817	0.016313214	0.02745098	0.04730832
YPL184C_YDR276C	0	0	16	4	1	1	197787	1013640	195949	1013473	612	55	5.74	4.02	68.663	6.138	0.057096248	0.053571429	0.070146819	0.089285714	0.061990212	0.160714286	0.017944535	0.035714286	0.057096248	0.053571429	0.003262643	0.035714286	0.044045677	0.017857143	0.052202284	0.017857143	0.053833605	0	0.073409462	0.035714286	0.052202284	0.053571429	0.060358891	0.071428571	0.070146819	0.160714286	0.014681892	0.017857143	0.039151713	0.035714286	0.016313214	0	0.04730832
YPL184C_YDR288W	0	0	16	4	1	0	197787	1037192	195949	1038103	612	303	5.74	5.12	68.663	33.964	0.057096248	0.059210526	0.070146819	0.042763158	0.061990212	0.098684211	0.017944535	0.023026316	0.057096248	0.032894737	0.003262643	0	0.044045677	0.075657895	0.052202284	0.029605263	0.053833605	0.085526316	0.073409462	0.101973684	0.052202284	0.023026316	0.060358891	0.052631579	0.070146819	0.105263158	0.014681892	0.003289474	0.039151713	0.029605263	0.016313214	0.019736842	0.04730832
YPL184C_YDR293C	0	0	16	4	1	1	197787	1049389	195949	1045637	612	1250	5.74	7.67	68.663	139.953	0.057096248	0.049560352	0.070146819	0.060751399	0.061990212	0.090327738	0.017944535	0.012789768	0.057096248	0.034372502	0.003262643	0.006394884	0.044045677	0.06314948	0.052202284	0.053557154	0.053833605	0.060751399	0.073409462	0.105515588	0.052202284	0.055955236	0.060358891	0.051159073	0.070146819	0.051159073	0.014681892	0.004796163	0.039151713	0.026378897	0.016313214	0.028776978	0.04730832
YPL184C_YDR309C	0	0	16	4	1	1	197787	1080196	195949	1079045	612	383	5.74	10.28	68.663	42.852	0.057096248	0.028645833	0.070146819	0.044270833	0.061990212	0.083333333	0.017944535	0.013020833	0.057096248	0.044270833	0.003262643	0.002604167	0.044045677	0.080729167	0.052202284	0.041666667	0.053833605	0.052083333	0.073409462	0.1796875	0.052202284	0.059895833	0.060358891	0.0234375	0.070146819	0.041666667	0.014681892	0.002604167	0.039151713	0.0234375	0.016313214	0.028645833	0.04730832
YPL184C_YDR320C-A	0	0	16	4	1	1	197787	1108496	195949	1108278	612	72	5.74	7.46	68.663	8.155	0.057096248	0.02739726	0.070146819	0.054794521	0.061990212	0.095890411	0.017944535	0.02739726	0.057096248	0.01369863	0.003262643	0	0.044045677	0.054794521	0.052202284	0.054794521	0.053833605	0.082191781	0.073409462	0.054794521	0.052202284	0.04109589	0.060358891	0.068493151	0.070146819	0.095890411	0.014681892	0.01369863	0.039151713	0.01369863	0.016313214	0.02739726	0.04730832
YPL184C_YDR406W	0	0	16	4	1	0	197787	1279203	195949	1283792	612	1529	5.74	7.87	68.663	172.254	0.057096248	0.062745098	0.070146819	0.079084967	0.061990212	0.08496732	0.017944535	0.02745098	0.057096248	0.05751634	0.003262643	0.015686275	0.044045677	0.054901961	0.052202284	0.039215686	0.053833605	0.047712418	0.073409462	0.08627451	0.052202284	0.041830065	0.060358891	0.05751634	0.070146819	0.05751634	0.014681892	0.018954248	0.039151713	0.050980392	0.016313214	0.018954248	0.04730832
YPL184C_YDR428C	0	0	16	4	1	1	197787	1324232	195949	1323447	612	261	5.74	5.07	68.663	29.991	0.057096248	0.038167939	0.070146819	0.045801527	0.061990212	0.118320611	0.017944535	0.030534351	0.057096248	0.038167939	0.003262643	0.007633588	0.044045677	0.053435115	0.052202284	0.049618321	0.053833605	0.061068702	0.073409462	0.06870229	0.052202284	0.038167939	0.060358891	0.057251908	0.070146819	0.072519084	0.014681892	0.019083969	0.039151713	0.053435115	0.016313214	0.019083969	0.04730832
YPL184C_YDR441C	0	0	16	4	1	1	197787	1345055	195949	1344510	612	181	5.74	4.68	68.663	19.986	0.057096248	0.082417582	0.070146819	0.076923077	0.061990212	0.104395604	0.017944535	0.010989011	0.057096248	0.087912088	0.003262643	0	0.044045677	0.054945055	0.052202284	0.027472527	0.053833605	0.093406593	0.073409462	0.054945055	0.052202284	0.043956044	0.060358891	0.071428571	0.070146819	0.087912088	0.014681892	0.005494505	0.039151713	0.016483516	0.016313214	0.032967033	0.04730832
YPL184C_YDR456W	0	0	16	4	1	0	197787	1367478	195949	1369379	612	633	5.74	4.5	68.663	70.147	0.057096248	0.059936909	0.070146819	0.058359621	0.061990212	0.119873817	0.017944535	0.025236593	0.057096248	0.06466877	0.003262643	0.011041009	0.044045677	0.028391167	0.052202284	0.029968454	0.053833605	0.041009464	0.073409462	0.094637224	0.052202284	0.044164038	0.060358891	0.067823344	0.070146819	0.099369085	0.014681892	0.011041009	0.039151713	0.036277603	0.016313214	0.012618297	0.04730832
YPL184C_YDR461W	0	0	16	4	1	0	197787	1385169	195949	1385279	612	36	5.74	8.41	68.663	3.926	0.057096248	0.027027027	0.070146819	0.135135135	0.061990212	0	0.017944535	0.027027027	0.057096248	0.027027027	0.003262643	0.027027027	0.044045677	0.135135135	0.052202284	0.027027027	0.053833605	0.054054054	0.073409462	0.081081081	0.052202284	0.081081081	0.060358891	0.054054054	0.070146819	0.081081081	0.014681892	0.027027027	0.039151713	0.027027027	0.016313214	0	0.04730832
YPL184C_YDR492W	0	0	16	4	1	0	197787	1434917	195949	1435867	612	316	5.74	8.47	68.663	36.491	0.057096248	0.047318612	0.070146819	0.03785489	0.061990212	0.09148265	0.017944535	0.025236593	0.057096248	0.107255521	0.003262643	0.018927445	0.044045677	0.05362776	0.052202284	0.025236593	0.053833605	0.028391167	0.073409462	0.09148265	0.052202284	0.031545741	0.060358891	0.069400631	0.070146819	0.088328076	0.014681892	0.034700315	0.039151713	0.044164038	0.016313214	0.03785489	0.04730832
YPL184C_YDR497C	0	0	16	4	1	1	197787	1445460	195949	1443706	612	584	5.74	6.51	68.663	63.569	0.057096248	0.087179487	0.070146819	0.075213675	0.061990212	0.090598291	0.017944535	0.022222222	0.057096248	0.063247863	0.003262643	0.013675214	0.044045677	0.041025641	0.052202284	0.034188034	0.053833605	0.046153846	0.073409462	0.083760684	0.052202284	0.032478632	0.060358891	0.073504274	0.070146819	0.102564103	0.014681892	0.015384615	0.039151713	0.025641026	0.016313214	0.013675214	0.04730832
YPL184C_YDR504C	0	0	16	4	1	1	197787	1456687	195949	1456304	612	127	5.74	9.41	68.663	15.58	0.057096248	0.0234375	0.070146819	0.0078125	0.061990212	0.109375	0.017944535	0.015625	0.057096248	0.1953125	0.003262643	0.0078125	0.044045677	0.0546875	0.052202284	0	0.053833605	0.03125	0.073409462	0.046875	0.052202284	0.0234375	0.060358891	0.0703125	0.070146819	0.09375	0.014681892	0.046875	0.039151713	0.078125	0.016313214	0.015625	0.04730832
YPL184C_YDR508C	0	0	16	4	1	1	197787	1468437	195949	1466446	612	663	5.74	7.67	68.663	73.597	0.057096248	0.079819277	0.070146819	0.081325301	0.061990212	0.085843373	0.017944535	0.028614458	0.057096248	0.057228916	0.003262643	0.019578313	0.044045677	0.054216867	0.052202284	0.031626506	0.053833605	0.052710843	0.073409462	0.082831325	0.052202284	0.036144578	0.060358891	0.075301205	0.070146819	0.075301205	0.014681892	0.019578313	0.039151713	0.039156627	0.016313214	0.015060241	0.04730832
YPL184C_YDR525W-A	0	0	16	4	1	0	197787	1490589	195949	1490828	612	79	5.74	6.5	68.663	9.18	0.057096248	0.05	0.070146819	0.075	0.061990212	0.1625	0.017944535	0.0125	0.057096248	0.1125	0.003262643	0.025	0.044045677	0.025	0.052202284	0	0.053833605	0.0375	0.073409462	0.075	0.052202284	0.05	0.060358891	0.0375	0.070146819	0.075	0.014681892	0.0125	0.039151713	0.05	0.016313214	0.05	0.04730832
YPL184C_YEL009C	0	1	16	5	1	1	197787	139763	195949	138918	612	281	5.74	4.93	68.663	31.31	0.057096248	0.021276596	0.070146819	0.067375887	0.061990212	0.095744681	0.017944535	0.017730496	0.057096248	0.039007092	0.003262643	0.003546099	0.044045677	0.081560284	0.052202284	0.028368794	0.053833605	0.085106383	0.073409462	0.109929078	0.052202284	0.070921986	0.060358891	0.074468085	0.070146819	0.031914894	0.014681892	0	0.039151713	0.014184397	0.016313214	0.014184397	0.04730832
YPL184C_YEL013W	0	0	16	5	1	0	197787	128825	195949	130561	612	578	5.74	4.86	68.663	63.207	0.057096248	0.041450777	0.070146819	0.093264249	0.061990212	0.13298791	0.017944535	0.013816926	0.057096248	0.020725389	0.003262643	0.003454231	0.044045677	0.050086356	0.052202284	0.043177893	0.053833605	0.065630397	0.073409462	0.088082902	0.052202284	0.034542314	0.060358891	0.070811744	0.070146819	0.06044905	0.014681892	0.022452504	0.039151713	0.018998273	0.016313214	0.017271157	0.04730832
YPL184C_YEL017C-A	0	0	16	5	1	1	197787	122929	195949	122798	612	43	5.74	12.09	68.663	4.848	0.057096248	0.090909091	0.070146819	0.068181818	0.061990212	0.136363636	0.017944535	0.045454545	0.057096248	0.045454545	0.003262643	0.022727273	0.044045677	0.022727273	0.052202284	0.068181818	0.053833605	0	0.073409462	0.045454545	0.052202284	0.022727273	0.060358891	0.068181818	0.070146819	0.159090909	0.014681892	0.022727273	0.039151713	0.022727273	0.016313214	0	0.04730832
YPL184C_YEL017W	0	0	16	5	1	0	197787	123657	195949	124670	612	337	5.74	4.7	68.663	38.234	0.057096248	0.032544379	0.070146819	0.053254438	0.061990212	0.115384615	0.017944535	0.017751479	0.057096248	0.068047337	0.003262643	0.00887574	0.044045677	0.062130178	0.052202284	0.029585799	0.053833605	0.047337278	0.073409462	0.115384615	0.052202284	0.032544379	0.060358891	0.038461538	0.070146819	0.047337278	0.014681892	0.017751479	0.039151713	0.044378698	0.016313214	0.01183432	0.04730832
YPL184C_YEL032W	0	0	16	5	1	0	197787	86937	195949	89852	612	971	5.74	5.19	68.663	107.516	0.057096248	0.060699588	0.070146819	0.079218107	0.061990212	0.092592593	0.017944535	0.016460905	0.057096248	0.032921811	0.003262643	0.00308642	0.044045677	0.048353909	0.052202284	0.032921811	0.053833605	0.069958848	0.073409462	0.077160494	0.052202284	0.049382716	0.060358891	0.064814815	0.070146819	0.058641975	0.014681892	0.002057613	0.039151713	0.022633745	0.016313214	0.022633745	0.04730832
YPL184C_YEL060C	0	0	16	5	1	1	197787	41953	195949	40046	612	635	5.74	6.37	68.663	69.621	0.057096248	0.086477987	0.070146819	0.077044025	0.061990212	0.070754717	0.017944535	0.011006289	0.057096248	0.044025157	0.003262643	0.006289308	0.044045677	0.094339623	0.052202284	0.033018868	0.053833605	0.066037736	0.073409462	0.081761006	0.052202284	0.033018868	0.060358891	0.051886792	0.070146819	0.055031447	0.014681892	0.006289308	0.039151713	0.020440252	0.016313214	0.04245283	0.04730832
YPL184C_YEL063C	0	0	16	5	1	1	197787	33466	195949	31694	612	590	5.74	8.58	68.663	65.785	0.057096248	0.082910321	0.070146819	0.084602369	0.061990212	0.077834179	0.017944535	0.021996616	0.057096248	0.084602369	0.003262643	0.027072758	0.044045677	0.049069374	0.052202284	0.020304569	0.053833605	0.047377327	0.073409462	0.069373942	0.052202284	0.042301184	0.060358891	0.069373942	0.070146819	0.096446701	0.014681892	0.008460237	0.039151713	0.035532995	0.016313214	0.013536379	0.04730832
YPL184C_YER003C	0	0	16	5	1	1	197787	159117	195949	157735	612	429	5.74	5.86	68.663	48.188	0.057096248	0.055813953	0.070146819	0.074418605	0.061990212	0.08372093	0.017944535	0.023255814	0.057096248	0.058139535	0.003262643	0.004651163	0.044045677	0.086046512	0.052202284	0.044186047	0.053833605	0.072093023	0.073409462	0.069767442	0.052202284	0.065116279	0.060358891	0.048837209	0.070146819	0.060465116	0.014681892	0.011627907	0.039151713	0.025581395	0.016313214	0.025581395	0.04730832
YPL184C_YER004W	0	0	16	5	1	0	197787	159579	195949	160274	612	231	5.74	10.03	68.663	25.086	0.057096248	0.099137931	0.070146819	0.094827586	0.061990212	0.112068966	0.017944535	0.017241379	0.057096248	0.038793103	0.003262643	0.004310345	0.044045677	0.068965517	0.052202284	0.043103448	0.053833605	0.047413793	0.073409462	0.060344828	0.052202284	0.034482759	0.060358891	0.068965517	0.070146819	0.056034483	0.014681892	0.00862069	0.039151713	0.025862069	0.016313214	0.021551724	0.04730832
YPL184C_YER011W	0	0	16	5	1	0	197787	175247	195949	176011	612	254	5.74	4.49	68.663	24.906	0.057096248	0.043137255	0.070146819	0.207843137	0.061990212	0.062745098	0.017944535	0.02745098	0.057096248	0.015686275	0.003262643	0.003921569	0.044045677	0.047058824	0.052202284	0.031372549	0.053833605	0.043137255	0.073409462	0.247058824	0.052202284	0.047058824	0.060358891	0.039215686	0.070146819	0.039215686	0.014681892	0	0.039151713	0.019607843	0.016313214	0.003921569	0.04730832
YPL184C_YER034W	0	0	16	5	1	0	197787	221845	195949	222402	612	185	5.74	5.81	68.663	21.19	0.057096248	0.021505376	0.070146819	0.080645161	0.061990212	0.107526882	0.017944535	0.010752688	0.057096248	0.016129032	0.003262643	0.005376344	0.044045677	0.11827957	0.052202284	0.064516129	0.053833605	0.080645161	0.073409462	0.043010753	0.052202284	0.043010753	0.060358891	0.048387097	0.070146819	0.021505376	0.014681892	0	0.039151713	0.016129032	0.016313214	0.021505376	0.04730832
YPL184C_YER035W	0	0	16	5	1	0	197787	222638	195949	223075	612	145	5.74	10.93	68.663	16.071	0.057096248	0.04109589	0.070146819	0.095890411	0.061990212	0.02739726	0.017944535	0.020547945	0.057096248	0.034246575	0.003262643	0	0.044045677	0.150684932	0.052202284	0.034246575	0.053833605	0.047945205	0.073409462	0.082191781	0.052202284	0.089041096	0.060358891	0.047945205	0.070146819	0.034246575	0.014681892	0.006849315	0.039151713	0.01369863	0.016313214	0.047945205	0.04730832
YPL184C_YER043C	0	0	16	5	1	1	197787	237118	195949	235769	612	449	5.74	6.2	68.663	49.125	0.057096248	0.082222222	0.070146819	0.1	0.061990212	0.091111111	0.017944535	0.026666667	0.057096248	0.037777778	0.003262643	0.008888889	0.044045677	0.064444444	0.052202284	0.031111111	0.053833605	0.071111111	0.073409462	0.048888889	0.052202284	0.028888889	0.060358891	0.082222222	0.070146819	0.066666667	0.014681892	0.024444444	0.039151713	0.026666667	0.016313214	0.035555556	0.04730832
YPL184C_YER044C	0	0	16	5	1	1	197787	238015	195949	237569	612	148	5.74	10.2	68.663	17.135	0.057096248	0.060402685	0.070146819	0.040268456	0.061990212	0.10738255	0.017944535	0.046979866	0.057096248	0.080536913	0.003262643	0.026845638	0.044045677	0.053691275	0.052202284	0.020134228	0.053833605	0.046979866	0.073409462	0.073825503	0.052202284	0.033557047	0.060358891	0.080536913	0.070146819	0.053691275	0.014681892	0.013422819	0.039151713	0.060402685	0.016313214	0.020134228	0.04730832
YPL184C_YER053C	0	0	16	5	1	1	197787	259638	195949	258736	612	300	5.74	10.19	68.663	33.528	0.057096248	0.086378738	0.070146819	0.066445183	0.061990212	0.07641196	0.017944535	0.03986711	0.057096248	0.049833887	0.003262643	0.019933555	0.044045677	0.089700997	0.052202284	0.043189369	0.053833605	0.03986711	0.073409462	0.073089701	0.052202284	0.043189369	0.060358891	0.069767442	0.070146819	0.066445183	0.014681892	0.026578073	0.039151713	0.059800664	0.016313214	0.009966777	0.04730832
YPL184C_YER064C	0	0	16	5	1	1	197787	284220	195949	282703	612	505	5.74	9.91	68.663	56.638	0.057096248	0.029644269	0.070146819	0.053359684	0.061990212	0.102766798	0.017944535	0.015810277	0.057096248	0.033596838	0.003262643	0.001976285	0.044045677	0.086956522	0.052202284	0.043478261	0.053833605	0.067193676	0.073409462	0.134387352	0.052202284	0.055335968	0.060358891	0.039525692	0.070146819	0.06916996	0.014681892	0.007905138	0.039151713	0.02173913	0.016313214	0.023715415	0.04730832
YPL184C_YER070W	0	0	16	5	1	0	197787	298948	195949	301614	612	888	5.74	6.12	68.663	99.56	0.057096248	0.05624297	0.070146819	0.086614173	0.061990212	0.077615298	0.017944535	0.030371204	0.057096248	0.034870641	0.003262643	0.011248594	0.044045677	0.059617548	0.052202284	0.035995501	0.053833605	0.065241845	0.073409462	0.071991001	0.052202284	0.048368954	0.060358891	0.053993251	0.070146819	0.066366704	0.014681892	0.015748031	0.039151713	0.048368954	0.016313214	0.01912261	0.04730832
YPL184C_YER095W	0	0	16	5	1	0	197787	349976	195949	351178	612	400	5.74	4.64	68.663	42.963	0.057096248	0.102244389	0.070146819	0.097256858	0.061990212	0.094763092	0.017944535	0.032418953	0.057096248	0.034912718	0.003262643	0	0.044045677	0.042394015	0.052202284	0.052369077	0.053833605	0.074812968	0.073409462	0.067331671	0.052202284	0.032418953	0.060358891	0.072319202	0.070146819	0.039900249	0.014681892	0.019950125	0.039151713	0.019950125	0.016313214	0.017456359	0.04730832
YPL184C_YER145C	0	0	16	5	1	1	197787	461735	195949	460521	612	404	5.74	8.53	68.663	45.722	0.057096248	0.081481481	0.070146819	0.064197531	0.061990212	0.118518519	0.017944535	0.02962963	0.057096248	0.056790123	0.003262643	0.019753086	0.044045677	0.051851852	0.052202284	0.034567901	0.053833605	0.056790123	0.073409462	0.069135802	0.052202284	0.024691358	0.060358891	0.071604938	0.070146819	0.081481481	0.014681892	0.017283951	0.039151713	0.04691358	0.016313214	0.019753086	0.04730832
YPL184C_YER158C	0	0	16	5	1	1	197787	490573	195949	488852	612	573	5.74	10.67	68.663	63.711	0.057096248	0.026132404	0.070146819	0.052264808	0.061990212	0.054006969	0.017944535	0.029616725	0.057096248	0.033101045	0.003262643	0.005226481	0.044045677	0.057491289	0.052202284	0.038327526	0.053833605	0.036585366	0.073409462	0.175958188	0.052202284	0.080139373	0.060358891	0.036585366	0.070146819	0.041811847	0.014681892	0.006968641	0.039151713	0.026132404	0.016313214	0.017421603	0.04730832
YPL184C_YER174C	0	0	16	5	1	1	197787	539163	195949	538429	612	244	5.74	4.39	68.663	27.493	0.057096248	0.040816327	0.070146819	0.073469388	0.061990212	0.07755102	0.017944535	0.016326531	0.057096248	0.065306122	0.003262643	0.008163265	0.044045677	0.065306122	0.052202284	0.06122449	0.053833605	0.106122449	0.073409462	0.089795918	0.052202284	0.044897959	0.060358891	0.065306122	0.070146819	0.069387755	0.014681892	0.008163265	0.039151713	0.016326531	0.016313214	0.012244898	0.04730832
YPL184C_YER186C	0	0	16	5	1	1	197787	562620	195949	561700	612	306	5.74	7.25	68.663	35.911	0.057096248	0.045602606	0.070146819	0.026058632	0.061990212	0.074918567	0.017944535	0.026058632	0.057096248	0.087947883	0.003262643	0.016286645	0.044045677	0.09771987	0.052202284	0.016286645	0.053833605	0.078175896	0.073409462	0.06514658	0.052202284	0.048859935	0.060358891	0.06514658	0.070146819	0.06514658	0.014681892	0.029315961	0.039151713	0.035830619	0.016313214	0.016286645	0.04730832
YPL184C_YFR050C	0	0	16	6	1	1	197787	249853	195949	249053	612	266	5.74	5.81	68.663	29.443	0.057096248	0.071161049	0.070146819	0.086142322	0.061990212	0.078651685	0.017944535	0.033707865	0.057096248	0.029962547	0.003262643	0.011235955	0.044045677	0.04494382	0.052202284	0.037453184	0.053833605	0.041198502	0.073409462	0.06741573	0.052202284	0.041198502	0.060358891	0.078651685	0.070146819	0.06741573	0.014681892	0	0.039151713	0.048689139	0.016313214	0.011235955	0.04730832
YPL184C_YGL008C	0	0	16	7	1	1	197787	482671	195949	479915	612	918	5.74	4.81	68.663	99.618	0.057096248	0.082698585	0.070146819	0.097932535	0.061990212	0.093579978	0.017944535	0.026115343	0.057096248	0.041349293	0.003262643	0.016322089	0.044045677	0.052230686	0.052202284	0.029379761	0.053833605	0.058759521	0.073409462	0.064200218	0.052202284	0.039173014	0.060358891	0.088139282	0.070146819	0.069640914	0.014681892	0.009793254	0.039151713	0.023939064	0.016313214	0.01523395	0.04730832
YPL184C_YGL012W	0	0	16	7	1	0	197787	472860	195949	474281	612	473	5.74	8.77	68.663	56.039	0.057096248	0.063291139	0.070146819	0.050632911	0.061990212	0.109704641	0.017944535	0.03164557	0.057096248	0.082278481	0.003262643	0.042194093	0.044045677	0.063291139	0.052202284	0.03164557	0.053833605	0.035864979	0.073409462	0.033755274	0.052202284	0.048523207	0.060358891	0.056962025	0.070146819	0.05907173	0.014681892	0.025316456	0.039151713	0.080168776	0.016313214	0.03164557	0.04730832
YPL184C_YGL014W	0	0	16	7	1	0	197787	466146	195949	468812	612	888	5.74	6.59	68.663	97.797	0.057096248	0.050618673	0.070146819	0.057367829	0.061990212	0.085489314	0.017944535	0.029246344	0.057096248	0.035995501	0.003262643	0.002249719	0.044045677	0.058492688	0.052202284	0.048368954	0.053833605	0.042744657	0.073409462	0.096737908	0.052202284	0.085489314	0.060358891	0.042744657	0.070146819	0.058492688	0.014681892	0.012373453	0.039151713	0.025871766	0.016313214	0.032620922	0.04730832
YPL184C_YGL028C	0	0	16	7	1	1	197787	442914	195949	441286	612	542	5.74	4.17	68.663	56.446	0.057096248	0.055248619	0.070146819	0.062615101	0.061990212	0.049723757	0.017944535	0.007366483	0.057096248	0.027624309	0.003262643	0.005524862	0.044045677	0.033149171	0.052202284	0.053406998	0.053833605	0.044198895	0.073409462	0.197053407	0.052202284	0.044198895	0.060358891	0.068139963	0.070146819	0.066298343	0.014681892	0.011049724	0.039151713	0.027624309	0.016313214	0.007366483	0.04730832
YPL184C_YGL032C	0	0	16	7	1	1	197787	436838	195949	436575	612	87	5.74	7.09	68.663	9.464	0.057096248	0.045454545	0.070146819	0.045454545	0.061990212	0.079545455	0.017944535	0.022727273	0.057096248	0.056818182	0.003262643	0	0.044045677	0.034090909	0.052202284	0.056818182	0.053833605	0.045454545	0.073409462	0.147727273	0.052202284	0.056818182	0.060358891	0.068181818	0.070146819	0.068181818	0.014681892	0.034090909	0.039151713	0.045454545	0.016313214	0.011363636	0.04730832
YPL184C_YGL055W	0	0	16	7	1	0	197787	398631	195949	400163	612	510	5.74	9.71	68.663	58.403	0.057096248	0.072407045	0.070146819	0.068493151	0.061990212	0.082191781	0.017944535	0.02739726	0.057096248	0.048923679	0.003262643	0.029354207	0.044045677	0.074363992	0.052202284	0.029354207	0.053833605	0.045009785	0.073409462	0.060665362	0.052202284	0.035225049	0.060358891	0.052837573	0.070146819	0.074363992	0.014681892	0.007827789	0.039151713	0.046966732	0.016313214	0.04109589	0.04730832
YPL184C_YGL068W	0	0	16	7	1	0	197787	375090	195949	375674	612	194	5.74	9.97	68.663	20.65	0.057096248	0.061538462	0.070146819	0.097435897	0.061990212	0.092307692	0.017944535	0.025641026	0.057096248	0.025641026	0.003262643	0.005128205	0.044045677	0.117948718	0.052202284	0.01025641	0.053833605	0.076923077	0.073409462	0.092307692	0.052202284	0.051282051	0.060358891	0.076923077	0.070146819	0.066666667	0.014681892	0	0.039151713	0	0.016313214	0.005128205	0.04730832
YPL184C_YGL085W	0	0	16	7	1	0	197787	349619	195949	350443	612	274	5.74	10.84	68.663	32.112	0.057096248	0.08	0.070146819	0.04	0.061990212	0.08	0.017944535	0.018181818	0.057096248	0.054545455	0.003262643	0.036363636	0.044045677	0.098181818	0.052202284	0.029090909	0.053833605	0.04	0.073409462	0.054545455	0.052202284	0.043636364	0.060358891	0.050909091	0.070146819	0.061818182	0.014681892	0.007272727	0.039151713	0.043636364	0.016313214	0.018181818	0.04730832
YPL184C_YGL125W	0	0	16	7	1	0	197787	272526	195949	274328	612	600	5.74	5.63	68.663	68.56	0.057096248	0.053244592	0.070146819	0.049916805	0.061990212	0.099833611	0.017944535	0.023294509	0.057096248	0.038269551	0.003262643	0.021630616	0.044045677	0.058236273	0.052202284	0.044925125	0.053833605	0.049916805	0.073409462	0.06655574	0.052202284	0.06156406	0.060358891	0.041597338	0.070146819	0.086522463	0.014681892	0.016638935	0.039151713	0.041597338	0.016313214	0.02828619	0.04730832
YPL184C_YGL142C	0	0	16	7	1	1	197787	238124	195949	236274	612	616	5.74	8.75	68.663	72.565	0.057096248	0.035656402	0.070146819	0.047001621	0.061990212	0.144246353	0.017944535	0.016207455	0.057096248	0.10534846	0.003262643	0.024311183	0.044045677	0.056726094	0.052202284	0.021069692	0.053833605	0.051863857	0.073409462	0.084278768	0.052202284	0.053484603	0.060358891	0.045380875	0.070146819	0.071312804	0.014681892	0.006482982	0.039151713	0.051863857	0.016313214	0.027552674	0.04730832
YPL184C_YGL178W	0	0	16	7	1	0	197787	167358	195949	170577	612	859	5.74	8.02	68.663	95.421	0.057096248	0.034883721	0.070146819	0.055813953	0.061990212	0.089534884	0.017944535	0.025581395	0.057096248	0.055813953	0.003262643	0.001162791	0.044045677	0.047674419	0.052202284	0.059302326	0.053833605	0.029069767	0.073409462	0.122093023	0.052202284	0.051162791	0.060358891	0.044186047	0.070146819	0.070930233	0.014681892	0.011627907	0.039151713	0.024418605	0.016313214	0.029069767	0.04730832
YPL184C_YGL215W	0	0	16	7	1	0	197787	87980	195949	89338	612	452	5.74	7.15	68.663	51.57	0.057096248	0.039735099	0.070146819	0.048565121	0.061990212	0.070640177	0.017944535	0.028697572	0.057096248	0.06401766	0.003262643	0.008830022	0.044045677	0.033112583	0.052202284	0.079470199	0.053833605	0.024282561	0.073409462	0.10816777	0.052202284	0.08388521	0.060358891	0.04415011	0.070146819	0.059602649	0.014681892	0	0.039151713	0.068432671	0.016313214	0.024282561	0.04730832
YPL184C_YGL219C	0	0	16	7	1	1	197787	84256	195949	82877	612	459	5.74	9.71	68.663	51.99	0.057096248	0.02826087	0.070146819	0.02173913	0.061990212	0.089130435	0.017944535	0.02173913	0.057096248	0.047826087	0.003262643	0.006521739	0.044045677	0.07826087	0.052202284	0.05	0.053833605	0.047826087	0.073409462	0.130434783	0.052202284	0.065217391	0.060358891	0.045652174	0.070146819	0.082608696	0.014681892	0.013043478	0.039151713	0.019565217	0.016313214	0.015217391	0.04730832
YPL184C_YGL225W	0	0	16	7	1	0	197787	76893	195949	77906	612	337	5.74	10.08	68.663	37.018	0.057096248	0.056213018	0.070146819	0.085798817	0.061990212	0.121301775	0.017944535	0.035502959	0.057096248	0.076923077	0.003262643	0.017751479	0.044045677	0.050295858	0.052202284	0.023668639	0.053833605	0.014792899	0.073409462	0.109467456	0.052202284	0.026627219	0.060358891	0.076923077	0.070146819	0.082840237	0.014681892	0.017751479	0.039151713	0.032544379	0.016313214	0.00591716	0.04730832
YPL184C_YGL226C-A	0	0	16	7	1	1	197787	73157	195949	72748	612	86	5.74	9.89	68.663	9.517	0.057096248	0.057471264	0.070146819	0.068965517	0.061990212	0.114942529	0.017944535	0.011494253	0.057096248	0.114942529	0.003262643	0	0.044045677	0.068965517	0.052202284	0.034482759	0.053833605	0.022988506	0.073409462	0.137931034	0.052202284	0.022988506	0.060358891	0.08045977	0.070146819	0.068965517	0.014681892	0.011494253	0.039151713	0.057471264	0.016313214	0.022988506	0.04730832
YPL184C_YGR038W	0	0	16	7	1	0	197787	560686	195949	561354	612	222	5.74	6.63	68.663	25.245	0.057096248	0.049327354	0.070146819	0.053811659	0.061990212	0.089686099	0.017944535	0.022421525	0.057096248	0.053811659	0.003262643	0.02690583	0.044045677	0.035874439	0.052202284	0.031390135	0.053833605	0.044843049	0.073409462	0.089686099	0.052202284	0.053811659	0.060358891	0.058295964	0.070146819	0.076233184	0.014681892	0.004484305	0.039151713	0.040358744	0.016313214	0.031390135	0.04730832
YPL184C_YGR055W	0	0	16	7	1	0	197787	599421	195949	601145	612	574	5.74	7.68	68.663	63.221	0.057096248	0.093913043	0.070146819	0.083478261	0.061990212	0.086956522	0.017944535	0.017391304	0.057096248	0.073043478	0.003262643	0.022608696	0.044045677	0.046956522	0.052202284	0.034782609	0.053833605	0.03826087	0.073409462	0.069565217	0.052202284	0.033043478	0.060358891	0.083478261	0.070146819	0.095652174	0.014681892	0.010434783	0.039151713	0.046956522	0.016313214	0.008695652	0.04730832
YPL184C_YGR062C	0	0	16	7	1	1	197787	617282	195949	616332	612	316	5.74	11.85	68.663	35.65	0.057096248	0.034700315	0.070146819	0.056782334	0.061990212	0.148264984	0.017944535	0.031545741	0.057096248	0.047318612	0.003262643	0.022082019	0.044045677	0.047318612	0.052202284	0.056782334	0.053833605	0.025236593	0.073409462	0.116719243	0.052202284	0.05362776	0.060358891	0.072555205	0.070146819	0.063091483	0.014681892	0.006309148	0.039151713	0.018927445	0.016313214	0.006309148	0.04730832
YPL184C_YGR126W	0	0	16	7	1	0	197787	745840	195949	746532	612	230	5.74	6.38	68.663	25.845	0.057096248	0.038961039	0.070146819	0.034632035	0.061990212	0.069264069	0.017944535	0.017316017	0.057096248	0.03030303	0.003262643	0	0.044045677	0.103896104	0.052202284	0.021645022	0.053833605	0.090909091	0.073409462	0.121212121	0.052202284	0.047619048	0.060358891	0.056277056	0.070146819	0.038961039	0.014681892	0	0.039151713	0.017316017	0.016313214	0.051948052	0.04730832
YPL184C_YGR138C	0	0	16	7	1	1	197787	765611	195949	763767	612	614	5.74	6.97	68.663	67.588	0.057096248	0.073170732	0.070146819	0.092682927	0.061990212	0.097560976	0.017944535	0.034146341	0.057096248	0.053658537	0.003262643	0.021138211	0.044045677	0.042276423	0.052202284	0.029268293	0.053833605	0.053658537	0.073409462	0.082926829	0.052202284	0.053658537	0.060358891	0.076422764	0.070146819	0.061788618	0.014681892	0.021138211	0.039151713	0.043902439	0.016313214	0.009756098	0.04730832
YPL184C_YGR158C	0	0	16	7	1	1	197787	806026	195949	805274	612	250	5.74	4.69	68.663	27.577	0.057096248	0.071713147	0.070146819	0.051792829	0.061990212	0.099601594	0.017944535	0.03187251	0.057096248	0.03187251	0.003262643	0.003984064	0.044045677	0.051792829	0.052202284	0.039840637	0.053833605	0.067729084	0.073409462	0.099601594	0.052202284	0.03187251	0.060358891	0.047808765	0.070146819	0.06374502	0.014681892	0.019920319	0.039151713	0.027888446	0.016313214	0.015936255	0.04730832
YPL184C_YGR172C	0	0	16	7	1	1	197787	843596	195949	842850	612	248	5.74	6.5	68.663	27.08	0.057096248	0.092369478	0.070146819	0.048192771	0.061990212	0.148594378	0.017944535	0.024096386	0.057096248	0.088353414	0.003262643	0.008032129	0.044045677	0.020080321	0.052202284	0.036144578	0.053833605	0.016064257	0.073409462	0.088353414	0.052202284	0.052208835	0.060358891	0.060240964	0.070146819	0.068273092	0.014681892	0.008032129	0.039151713	0.036144578	0.016313214	0.024096386	0.04730832
YPL184C_YGR191W	0	0	16	7	1	0	197787	880425	195949	882236	612	603	5.74	7.36	68.663	66.006	0.057096248	0.074503311	0.070146819	0.084437086	0.061990212	0.109271523	0.017944535	0.023178808	0.057096248	0.062913907	0.003262643	0.021523179	0.044045677	0.043046358	0.052202284	0.014900662	0.053833605	0.044701987	0.073409462	0.09602649	0.052202284	0.03807947	0.060358891	0.072847682	0.070146819	0.071192053	0.014681892	0.014900662	0.039151713	0.024834437	0.016313214	0.013245033	0.04730832
YPL184C_YGR203W	0	0	16	7	1	0	197787	905242	195949	905688	612	148	5.74	7.6	68.663	17.248	0.057096248	0.080536913	0.070146819	0.046979866	0.061990212	0.127516779	0.017944535	0.033557047	0.057096248	0.020134228	0.003262643	0.033557047	0.044045677	0.033557047	0.052202284	0.046979866	0.053833605	0.053691275	0.073409462	0.073825503	0.052202284	0.033557047	0.060358891	0.053691275	0.070146819	0.020134228	0.014681892	0.013422819	0.039151713	0.053691275	0.016313214	0.040268456	0.04730832
YPL184C_YGR205W	0	0	16	7	1	0	197787	909218	195949	910090	612	290	5.74	5.14	68.663	33.337	0.057096248	0.079037801	0.070146819	0.013745704	0.061990212	0.10652921	0.017944535	0.020618557	0.057096248	0.06185567	0.003262643	0.013745704	0.044045677	0.075601375	0.052202284	0.04467354	0.053833605	0.06185567	0.073409462	0.058419244	0.052202284	0.037800687	0.060358891	0.048109966	0.070146819	0.068728522	0.014681892	0.013745704	0.039151713	0.04467354	0.016313214	0.020618557	0.04730832
YPL184C_YGR258C	0	0	16	7	1	1	197787	1010772	195949	1007677	612	1031	5.74	4.92	68.663	117.837	0.057096248	0.049418605	0.070146819	0.04748062	0.061990212	0.080426357	0.017944535	0.024224806	0.057096248	0.046511628	0.003262643	0.009689922	0.044045677	0.093992248	0.052202284	0.043604651	0.053833605	0.096899225	0.073409462	0.083333333	0.052202284	0.039728682	0.060358891	0.049418605	0.070146819	0.055232558	0.014681892	0.003875969	0.039151713	0.022286822	0.016313214	0.009689922	0.04730832
YPL184C_YGR260W	0	0	16	7	1	0	197787	1012491	195949	1014095	612	534	5.74	6.8	68.663	60.134	0.057096248	0.071028037	0.070146819	0.061682243	0.061990212	0.095327103	0.017944535	0.03364486	0.057096248	0.072897196	0.003262643	0.014953271	0.044045677	0.057943925	0.052202284	0.022429907	0.053833605	0.048598131	0.073409462	0.074766355	0.052202284	0.037383178	0.060358891	0.065420561	0.070146819	0.080373832	0.014681892	0.024299065	0.039151713	0.046728972	0.016313214	0.013084112	0.04730832
YPL184C_YGR267C	0	0	16	7	1	1	197787	1025741	195949	1025010	612	243	5.74	7.23	68.663	27.769	0.057096248	0.06147541	0.070146819	0.053278689	0.061990212	0.090163934	0.017944535	0.040983607	0.057096248	0.028688525	0.003262643	0.004098361	0.044045677	0.053278689	0.052202284	0.040983607	0.053833605	0.098360656	0.073409462	0.053278689	0.052202284	0.040983607	0.060358891	0.069672131	0.070146819	0.077868852	0.014681892	0.012295082	0.039151713	0.028688525	0.016313214	0.032786885	0.04730832
YPL184C_YGR279C	0	0	16	7	1	1	197787	1049965	195949	1048805	612	386	5.74	4.52	68.663	40.173	0.057096248	0.062015504	0.070146819	0.142118863	0.061990212	0.043927649	0.017944535	0.005167959	0.057096248	0.023255814	0.003262643	0.015503876	0.044045677	0.046511628	0.052202284	0.043927649	0.053833605	0.043927649	0.073409462	0.147286822	0.052202284	0.028423773	0.060358891	0.093023256	0.070146819	0.041343669	0.014681892	0.012919897	0.039151713	0.03875969	0.016313214	0.007751938	0.04730832
YPL184C_YGR281W	0	0	16	7	1	0	197787	1052831	195949	1057264	612	1477	5.74	7.65	68.663	166.727	0.057096248	0.059539919	0.070146819	0.066982409	0.061990212	0.103518268	0.017944535	0.034506089	0.057096248	0.057510149	0.003262643	0.01082544	0.044045677	0.072395129	0.052202284	0.028416779	0.053833605	0.064276049	0.073409462	0.066982409	0.052202284	0.035859269	0.060358891	0.058186739	0.070146819	0.079161028	0.014681892	0.01150203	0.039151713	0.027063599	0.016313214	0.01285521	0.04730832
YPL184C_YGR282C	0	0	16	7	1	1	197787	1058731	195949	1057790	612	313	5.74	4.16	68.663	34.118	0.057096248	0.066878981	0.070146819	0.098726115	0.061990212	0.057324841	0.017944535	0.015923567	0.057096248	0.057324841	0.003262643	0.02866242	0.044045677	0.050955414	0.052202284	0.041401274	0.053833605	0.047770701	0.073409462	0.114649682	0.052202284	0.01910828	0.060358891	0.079617834	0.070146819	0.035031847	0.014681892	0.012738854	0.039151713	0.038216561	0.016313214	0.006369427	0.04730832
YPL184C_YHL017W	0	0	16	8	1	0	197787	70273	195949	71871	612	532	5.74	4.39	68.663	61.205	0.057096248	0.03564728	0.070146819	0.054409006	0.061990212	0.120075047	0.017944535	0.024390244	0.057096248	0.067542214	0.003262643	0.015009381	0.044045677	0.037523452	0.052202284	0.039399625	0.053833605	0.05065666	0.073409462	0.07879925	0.052202284	0.024390244	0.060358891	0.069418386	0.070146819	0.065666041	0.014681892	0.024390244	0.039151713	0.060037523	0.016313214	0.016885553	0.04730832
[truncated: 12,405 more rows]
[truncated: 150 more columns]
