# Supplementary material for: In silico characterization and prediction of global protein–mRNA interactions in yeast
Source: Oxford University Press journal article supplement (doi:10.1093/nar/gkr160), 2011-04-01
Supplement: 1371415_Supplementary_Data.zip [file 1371415_Supplementary_Data.zip › Dataset_S7.xls]

## Sheet: positive dataset
gene	entrez	symbol	name	ID	length	massh	Arel	Crel	Drel	Erel	Frel	Grel	Hrel	Irel	Krel	Lrel	Mrel	Nrel	Prel	Qrel	Rrel	Srel	Trel	Vrel	Wrel	Yrel	alphahelixCHOP780201	betasheetCHOP780202	betaturnCHOP780203	buriedWERD780101	isoelectricpointZIMJ680104	netchargeKLEP840101	hydrophobicmomentEISD860102	positivechargeFAUJ880111	flexibilityVINM940101	vdWaalsvolumeFAUJ880103	partitionenergiesGUYH850105	solventwaterNOZY710101	CDS_LENGTH	CDS_ntArel	CDS_ntCrel	CDS_ntGrel	CDS_ntTrel	CDS_ntAGrel	CDS_ntCGrel	CDS_dintAArel	CDS_dinetACrel	CDS_dintAGrel	CDS_dintATrel
NP872348_NM004044	22867	EIF2C1	AGO1	NP872348.2	696	81681.6	0.0402299	0.00431035	0.0416667	0.16954	0.0287356	0.0373563	0.0172414	0.0488506	0.100575	0.114943	0.0172414	0.045977	0.0445402	0.0387931	0.0287356	0.0632184	0.0560345	0.0344828	0.012931	0.0545977	1.0735	0.932	1.0009	0.5138	5.8204	-0.0818	2.1113	0.1465	1.0152	3.6624	0.2355	0.6614	1779	0.274311	0.222597	0.24733	0.255762	0.521641	0.469927	0.0612704	0.0500281	0.0786959	0.0635188
NP872348_NM001688	22867	EIF2C1	AGO1	NP872348.2	696	81681.6	0.0402299	0.00431035	0.0416667	0.16954	0.0287356	0.0373563	0.0172414	0.0488506	0.100575	0.114943	0.0172414	0.045977	0.0445402	0.0387931	0.0287356	0.0632184	0.0560345	0.0344828	0.012931	0.0545977	1.0735	0.932	1.0009	0.5138	5.8204	-0.0818	2.1113	0.1465	1.0152	3.6624	0.2355	0.6614	771	0.299611	0.228275	0.233463	0.238651	0.533074	0.461738	0.075227	0.0609598	0.07393	0.0661479
NP872348_NM152265	22867	EIF2C1	AGO1	NP872348.2	696	81681.6	0.0402299	0.00431035	0.0416667	0.16954	0.0287356	0.0373563	0.0172414	0.0488506	0.100575	0.114943	0.0172414	0.045977	0.0445402	0.0387931	0.0287356	0.0632184	0.0560345	0.0344828	0.012931	0.0545977	1.0735	0.932	1.0009	0.5138	5.8204	-0.0818	2.1113	0.1465	1.0152	3.6624	0.2355	0.6614	477	0.356394	0.184486	0.226415	0.232704	0.582809	0.410901	0.102725	0.048218	0.100629	0.0691824
NP872348_NM022063	22867	EIF2C1	AGO1	NP872348.2	696	81681.6	0.0402299	0.00431035	0.0416667	0.16954	0.0287356	0.0373563	0.0172414	0.0488506	0.100575	0.114943	0.0172414	0.045977	0.0445402	0.0387931	0.0287356	0.0632184	0.0560345	0.0344828	0.012931	0.0545977	1.0735	0.932	1.0009	0.5138	5.8204	-0.0818	2.1113	0.1465	1.0152	3.6624	0.2355	0.6614	702	0.396011	0.163818	0.240741	0.19943	0.636752	0.404558	0.122507	0.048433	0.102564	0.0612536
NP872348_NM003796	22867	EIF2C1	AGO1	NP872348.2	696	81681.6	0.0402299	0.00431035	0.0416667	0.16954	0.0287356	0.0373563	0.0172414	0.0488506	0.100575	0.114943	0.0172414	0.045977	0.0445402	0.0387931	0.0287356	0.0632184	0.0560345	0.0344828	0.012931	0.0545977	1.0735	0.932	1.0009	0.5138	5.8204	-0.0818	2.1113	0.1465	1.0152	3.6624	0.2355	0.6614	1608	0.326493	0.199005	0.239428	0.235075	0.56592	0.438433	0.0833333	0.0578358	0.0845771	0.0696517
NP872348_NM058182	22867	EIF2C1	AGO1	NP872348.2	696	81681.6	0.0402299	0.00431035	0.0416667	0.16954	0.0287356	0.0373563	0.0172414	0.0488506	0.100575	0.114943	0.0172414	0.045977	0.0445402	0.0387931	0.0287356	0.0632184	0.0560345	0.0344828	0.012931	0.0545977	1.0735	0.932	1.0009	0.5138	5.8204	-0.0818	2.1113	0.1465	1.0152	3.6624	0.2355	0.6614	177	0.378531	0.158192	0.248588	0.214689	0.627119	0.40678	0.129944	0.039548	0.0734463	0.0621469
NP872348_NM015702	22867	EIF2C1	AGO1	NP872348.2	696	81681.6	0.0402299	0.00431035	0.0416667	0.16954	0.0287356	0.0373563	0.0172414	0.0488506	0.100575	0.114943	0.0172414	0.045977	0.0445402	0.0387931	0.0287356	0.0632184	0.0560345	0.0344828	0.012931	0.0545977	1.0735	0.932	1.0009	0.5138	5.8204	-0.0818	2.1113	0.1465	1.0152	3.6624	0.2355	0.6614	891	0.298541	0.181818	0.227834	0.291807	0.526375	0.409652	0.0729517	0.0527497	0.0718294	0.0763187
NP872348_NM001040438	22867	EIF2C1	AGO1	NP872348.2	696	81681.6	0.0402299	0.00431035	0.0416667	0.16954	0.0287356	0.0373563	0.0172414	0.0488506	0.100575	0.114943	0.0172414	0.045977	0.0445402	0.0387931	0.0287356	0.0632184	0.0560345	0.0344828	0.012931	0.0545977	1.0735	0.932	1.0009	0.5138	5.8204	-0.0818	2.1113	0.1465	1.0152	3.6624	0.2355	0.6614	228	0.232456	0.214912	0.25	0.302632	0.482456	0.464912	0.0482456	0.0394737	0.0614035	0.0701754
NP872348_NM001743	22867	EIF2C1	AGO1	NP872348.2	696	81681.6	0.0402299	0.00431035	0.0416667	0.16954	0.0287356	0.0373563	0.0172414	0.0488506	0.100575	0.114943	0.0172414	0.045977	0.0445402	0.0387931	0.0287356	0.0632184	0.0560345	0.0344828	0.012931	0.0545977	1.0735	0.932	1.0009	0.5138	5.8204	-0.0818	2.1113	0.1465	1.0152	3.6624	0.2355	0.6614	450	0.371111	0.135556	0.255556	0.237778	0.626667	0.391111	0.0977778	0.0555556	0.0955556	0.0933333
NP872348_NM015439	22867	EIF2C1	AGO1	NP872348.2	696	81681.6	0.0402299	0.00431035	0.0416667	0.16954	0.0287356	0.0373563	0.0172414	0.0488506	0.100575	0.114943	0.0172414	0.045977	0.0445402	0.0387931	0.0287356	0.0632184	0.0560345	0.0344828	0.012931	0.0545977	1.0735	0.932	1.0009	0.5138	5.8204	-0.0818	2.1113	0.1465	1.0152	3.6624	0.2355	0.6614	825	0.281212	0.209697	0.282424	0.226667	0.563636	0.492121	0.0739394	0.0412121	0.0872727	0.0472727
NP872348_NM021178	22867	EIF2C1	AGO1	NP872348.2	696	81681.6	0.0402299	0.00431035	0.0416667	0.16954	0.0287356	0.0373563	0.0172414	0.0488506	0.100575	0.114943	0.0172414	0.045977	0.0445402	0.0387931	0.0287356	0.0632184	0.0560345	0.0344828	0.012931	0.0545977	1.0735	0.932	1.0009	0.5138	5.8204	-0.0818	2.1113	0.1465	1.0152	3.6624	0.2355	0.6614	834	0.288969	0.223022	0.224221	0.263789	0.513189	0.447242	0.0611511	0.0491607	0.0851319	0.0707434
NP872348_NM139286	22867	EIF2C1	AGO1	NP872348.2	696	81681.6	0.0402299	0.00431035	0.0416667	0.16954	0.0287356	0.0373563	0.0172414	0.0488506	0.100575	0.114943	0.0172414	0.045977	0.0445402	0.0387931	0.0287356	0.0632184	0.0560345	0.0344828	0.012931	0.0545977	1.0735	0.932	1.0009	0.5138	5.8204	-0.0818	2.1113	0.1465	1.0152	3.6624	0.2355	0.6614	258	0.341085	0.182171	0.267442	0.209302	0.608527	0.449612	0.0930233	0.0465116	0.104651	0.0736434
NP872348_NM019029	22867	EIF2C1	AGO1	NP872348.2	696	81681.6	0.0402299	0.00431035	0.0416667	0.16954	0.0287356	0.0373563	0.0172414	0.0488506	0.100575	0.114943	0.0172414	0.045977	0.0445402	0.0387931	0.0287356	0.0632184	0.0560345	0.0344828	0.012931	0.0545977	1.0735	0.932	1.0009	0.5138	5.8204	-0.0818	2.1113	0.1465	1.0152	3.6624	0.2355	0.6614	1431	0.283019	0.206848	0.239693	0.27044	0.522711	0.446541	0.0607966	0.0566038	0.07058	0.0803634
NP872348_NM003798	22867	EIF2C1	AGO1	NP872348.2	696	81681.6	0.0402299	0.00431035	0.0416667	0.16954	0.0287356	0.0373563	0.0172414	0.0488506	0.100575	0.114943	0.0172414	0.045977	0.0445402	0.0387931	0.0287356	0.0632184	0.0560345	0.0344828	0.012931	0.0545977	1.0735	0.932	1.0009	0.5138	5.8204	-0.0818	2.1113	0.1465	1.0152	3.6624	0.2355	0.6614	2205	0.335147	0.187302	0.223583	0.253968	0.55873	0.410884	0.0888889	0.0571429	0.0852608	0.0693878
NP872348_NM003592	22867	EIF2C1	AGO1	NP872348.2	696	81681.6	0.0402299	0.00431035	0.0416667	0.16954	0.0287356	0.0373563	0.0172414	0.0488506	0.100575	0.114943	0.0172414	0.045977	0.0445402	0.0387931	0.0287356	0.0632184	0.0560345	0.0344828	0.012931	0.0545977	1.0735	0.932	1.0009	0.5138	5.8204	-0.0818	2.1113	0.1465	1.0152	3.6624	0.2355	0.6614	2331	0.323037	0.198627	0.232518	0.245817	0.555556	0.431145	0.0832261	0.0604891	0.0806521	0.0699271
NP872348_NM014015	22867	EIF2C1	AGO1	NP872348.2	696	81681.6	0.0402299	0.00431035	0.0416667	0.16954	0.0287356	0.0373563	0.0172414	0.0488506	0.100575	0.114943	0.0172414	0.045977	0.0445402	0.0387931	0.0287356	0.0632184	0.0560345	0.0344828	0.012931	0.0545977	1.0735	0.932	1.0009	0.5138	5.8204	-0.0818	2.1113	0.1465	1.0152	3.6624	0.2355	0.6614	288	0.118056	0.354167	0.288194	0.239583	0.40625	0.642361	0.00694444	0.0590278	0.0208333	0.03125
NP872348_NM000791	22867	EIF2C1	AGO1	NP872348.2	696	81681.6	0.0402299	0.00431035	0.0416667	0.16954	0.0287356	0.0373563	0.0172414	0.0488506	0.100575	0.114943	0.0172414	0.045977	0.0445402	0.0387931	0.0287356	0.0632184	0.0560345	0.0344828	0.012931	0.0545977	1.0735	0.932	1.0009	0.5138	5.8204	-0.0818	2.1113	0.1465	1.0152	3.6624	0.2355	0.6614	564	0.322695	0.191489	0.225177	0.260638	0.547872	0.416667	0.0851064	0.0496454	0.0886525	0.0744681
NP872348_NM016306	22867	EIF2C1	AGO1	NP872348.2	696	81681.6	0.0402299	0.00431035	0.0416667	0.16954	0.0287356	0.0373563	0.0172414	0.0488506	0.100575	0.114943	0.0172414	0.045977	0.0445402	0.0387931	0.0287356	0.0632184	0.0560345	0.0344828	0.012931	0.0545977	1.0735	0.932	1.0009	0.5138	5.8204	-0.0818	2.1113	0.1465	1.0152	3.6624	0.2355	0.6614	1077	0.300836	0.191272	0.272981	0.234912	0.573816	0.464253	0.0696379	0.0501393	0.0891365	0.0696379
NP872348_NM001402	22867	EIF2C1	AGO1	NP872348.2	696	81681.6	0.0402299	0.00431035	0.0416667	0.16954	0.0287356	0.0373563	0.0172414	0.0488506	0.100575	0.114943	0.0172414	0.045977	0.0445402	0.0387931	0.0287356	0.0632184	0.0560345	0.0344828	0.012931	0.0545977	1.0735	0.932	1.0009	0.5138	5.8204	-0.0818	2.1113	0.1465	1.0152	3.6624	0.2355	0.6614	1389	0.269978	0.219582	0.262059	0.24838	0.532037	0.481641	0.0676746	0.0539957	0.062635	0.062635
NP872348_NM001404	22867	EIF2C1	AGO1	NP872348.2	696	81681.6	0.0402299	0.00431035	0.0416667	0.16954	0.0287356	0.0373563	0.0172414	0.0488506	0.100575	0.114943	0.0172414	0.045977	0.0445402	0.0387931	0.0287356	0.0632184	0.0560345	0.0344828	0.012931	0.0545977	1.0735	0.932	1.0009	0.5138	5.8204	-0.0818	2.1113	0.1465	1.0152	3.6624	0.2355	0.6614	1314	0.235921	0.262557	0.282344	0.219178	0.518265	0.544901	0.0479452	0.0517504	0.0837139	0.0403349
NP872348_NM001967	22867	EIF2C1	AGO1	NP872348.2	696	81681.6	0.0402299	0.00431035	0.0416667	0.16954	0.0287356	0.0373563	0.0172414	0.0488506	0.100575	0.114943	0.0172414	0.045977	0.0445402	0.0387931	0.0287356	0.0632184	0.0560345	0.0344828	0.012931	0.0545977	1.0735	0.932	1.0009	0.5138	5.8204	-0.0818	2.1113	0.1465	1.0152	3.6624	0.2355	0.6614	1224	0.294935	0.178105	0.251634	0.275327	0.546569	0.429739	0.0653595	0.0547386	0.0735294	0.0800654
NP872348_NM016078	22867	EIF2C1	AGO1	NP872348.2	696	81681.6	0.0402299	0.00431035	0.0416667	0.16954	0.0287356	0.0373563	0.0172414	0.0488506	0.100575	0.114943	0.0172414	0.045977	0.0445402	0.0387931	0.0287356	0.0632184	0.0560345	0.0344828	0.012931	0.0545977	1.0735	0.932	1.0009	0.5138	5.8204	-0.0818	2.1113	0.1465	1.0152	3.6624	0.2355	0.6614	618	0.268608	0.171521	0.257282	0.302589	0.52589	0.428803	0.0582524	0.0453074	0.0809061	0.0679612
NP872348_NM001996	22867	EIF2C1	AGO1	NP872348.2	696	81681.6	0.0402299	0.00431035	0.0416667	0.16954	0.0287356	0.0373563	0.0172414	0.0488506	0.100575	0.114943	0.0172414	0.045977	0.0445402	0.0387931	0.0287356	0.0632184	0.0560345	0.0344828	0.012931	0.0545977	1.0735	0.932	1.0009	0.5138	5.8204	-0.0818	2.1113	0.1465	1.0152	3.6624	0.2355	0.6614	2052	0.198343	0.300682	0.30117	0.199805	0.499513	0.601852	0.0321637	0.0526316	0.0701754	0.041423
NP872348_NM001449	22867	EIF2C1	AGO1	NP872348.2	696	81681.6	0.0402299	0.00431035	0.0416667	0.16954	0.0287356	0.0373563	0.0172414	0.0488506	0.100575	0.114943	0.0172414	0.045977	0.0445402	0.0387931	0.0287356	0.0632184	0.0560345	0.0344828	0.012931	0.0545977	1.0735	0.932	1.0009	0.5138	5.8204	-0.0818	2.1113	0.1465	1.0152	3.6624	0.2355	0.6614	843	0.250297	0.253855	0.274021	0.221827	0.524318	0.527877	0.0699881	0.0628707	0.0676157	0.0367734
NP872348_NM000516	22867	EIF2C1	AGO1	NP872348.2	696	81681.6	0.0402299	0.00431035	0.0416667	0.16954	0.0287356	0.0373563	0.0172414	0.0488506	0.100575	0.114943	0.0172414	0.045977	0.0445402	0.0387931	0.0287356	0.0632184	0.0560345	0.0344828	0.012931	0.0545977	1.0735	0.932	1.0009	0.5138	5.8204	-0.0818	2.1113	0.1465	1.0152	3.6624	0.2355	0.6614	1185	0.253165	0.268354	0.2827	0.195781	0.535865	0.551055	0.0531646	0.0658228	0.0801688	0.0438819
NP872348_NM013285	22867	EIF2C1	AGO1	NP872348.2	696	81681.6	0.0402299	0.00431035	0.0416667	0.16954	0.0287356	0.0373563	0.0172414	0.0488506	0.100575	0.114943	0.0172414	0.045977	0.0445402	0.0387931	0.0287356	0.0632184	0.0560345	0.0344828	0.012931	0.0545977	1.0735	0.932	1.0009	0.5138	5.8204	-0.0818	2.1113	0.1465	1.0152	3.6624	0.2355	0.6614	2196	0.335155	0.20173	0.249089	0.214026	0.584244	0.45082	0.0887978	0.0591985	0.0938069	0.0564663
NP872348_NM014320	22867	EIF2C1	AGO1	NP872348.2	696	81681.6	0.0402299	0.00431035	0.0416667	0.16954	0.0287356	0.0373563	0.0172414	0.0488506	0.100575	0.114943	0.0172414	0.045977	0.0445402	0.0387931	0.0287356	0.0632184	0.0560345	0.0344828	0.012931	0.0545977	1.0735	0.932	1.0009	0.5138	5.8204	-0.0818	2.1113	0.1465	1.0152	3.6624	0.2355	0.6614	618	0.297735	0.231392	0.255663	0.21521	0.553398	0.487055	0.0711974	0.0566343	0.0857605	0.0566343
NP872348_NM002128	22867	EIF2C1	AGO1	NP872348.2	696	81681.6	0.0402299	0.00431035	0.0416667	0.16954	0.0287356	0.0373563	0.0172414	0.0488506	0.100575	0.114943	0.0172414	0.045977	0.0445402	0.0387931	0.0287356	0.0632184	0.0560345	0.0344828	0.012931	0.0545977	1.0735	0.932	1.0009	0.5138	5.8204	-0.0818	2.1113	0.1465	1.0152	3.6624	0.2355	0.6614	648	0.37963	0.158951	0.277778	0.183642	0.657407	0.436728	0.118827	0.0200617	0.123457	0.0709877
NP872348_NM002137	22867	EIF2C1	AGO1	NP872348.2	696	81681.6	0.0402299	0.00431035	0.0416667	0.16954	0.0287356	0.0373563	0.0172414	0.0488506	0.100575	0.114943	0.0172414	0.045977	0.0445402	0.0387931	0.0287356	0.0632184	0.0560345	0.0344828	0.012931	0.0545977	1.0735	0.932	1.0009	0.5138	5.8204	-0.0818	2.1113	0.1465	1.0152	3.6624	0.2355	0.6614	1026	0.306043	0.133528	0.319688	0.240741	0.625731	0.453216	0.0730994	0.045809	0.0925926	0.0721248
NP872348_NM031370	22867	EIF2C1	AGO1	NP872348.2	696	81681.6	0.0402299	0.00431035	0.0416667	0.16954	0.0287356	0.0373563	0.0172414	0.0488506	0.100575	0.114943	0.0172414	0.045977	0.0445402	0.0387931	0.0287356	0.0632184	0.0560345	0.0344828	0.012931	0.0545977	1.0735	0.932	1.0009	0.5138	5.8204	-0.0818	2.1113	0.1465	1.0152	3.6624	0.2355	0.6614	1068	0.310861	0.178839	0.317416	0.192884	0.628277	0.496255	0.082397	0.0514981	0.0926966	0.0599251
NP872348_NM005520	22867	EIF2C1	AGO1	NP872348.2	696	81681.6	0.0402299	0.00431035	0.0416667	0.16954	0.0287356	0.0373563	0.0172414	0.0488506	0.100575	0.114943	0.0172414	0.045977	0.0445402	0.0387931	0.0287356	0.0632184	0.0560345	0.0344828	0.012931	0.0545977	1.0735	0.932	1.0009	0.5138	5.8204	-0.0818	2.1113	0.1465	1.0152	3.6624	0.2355	0.6614	1350	0.287407	0.181481	0.288148	0.242963	0.575556	0.46963	0.0592593	0.0525926	0.0888889	0.0666667
NP872348_NM002161	22867	EIF2C1	AGO1	NP872348.2	696	81681.6	0.0402299	0.00431035	0.0416667	0.16954	0.0287356	0.0373563	0.0172414	0.0488506	0.100575	0.114943	0.0172414	0.045977	0.0445402	0.0387931	0.0287356	0.0632184	0.0560345	0.0344828	0.012931	0.0545977	1.0735	0.932	1.0009	0.5138	5.8204	-0.0818	2.1113	0.1465	1.0152	3.6624	0.2355	0.6614	3789	0.290314	0.207707	0.235682	0.266297	0.525996	0.443389	0.0683558	0.0580628	0.0749538	0.0659805
NP872348_NM000884	22867	EIF2C1	AGO1	NP872348.2	696	81681.6	0.0402299	0.00431035	0.0416667	0.16954	0.0287356	0.0373563	0.0172414	0.0488506	0.100575	0.114943	0.0172414	0.045977	0.0445402	0.0387931	0.0287356	0.0632184	0.0560345	0.0344828	0.012931	0.0545977	1.0735	0.932	1.0009	0.5138	5.8204	-0.0818	2.1113	0.1465	1.0152	3.6624	0.2355	0.6614	1545	0.252427	0.25178	0.273786	0.222006	0.526214	0.525566	0.0504854	0.0530744	0.0724919	0.0614887
NP872348_NM007317	22867	EIF2C1	AGO1	NP872348.2	696	81681.6	0.0402299	0.00431035	0.0416667	0.16954	0.0287356	0.0373563	0.0172414	0.0488506	0.100575	0.114943	0.0172414	0.045977	0.0445402	0.0387931	0.0287356	0.0632184	0.0560345	0.0344828	0.012931	0.0545977	1.0735	0.932	1.0009	0.5138	5.8204	-0.0818	2.1113	0.1465	1.0152	3.6624	0.2355	0.6614	1997	0.233851	0.283926	0.299449	0.182273	0.5333	0.583375	0.0445668	0.0435653	0.0956435	0.0380571
NP872348_NM000527	22867	EIF2C1	AGO1	NP872348.2	696	81681.6	0.0402299	0.00431035	0.0416667	0.16954	0.0287356	0.0373563	0.0172414	0.0488506	0.100575	0.114943	0.0172414	0.045977	0.0445402	0.0387931	0.0287356	0.0632184	0.0560345	0.0344828	0.012931	0.0545977	1.0735	0.932	1.0009	0.5138	5.8204	-0.0818	2.1113	0.1465	1.0152	3.6624	0.2355	0.6614	2583	0.222997	0.297329	0.287263	0.192412	0.510259	0.584592	0.042199	0.0669764	0.0681378	0.0379404
NP872348_NM002344	22867	EIF2C1	AGO1	NP872348.2	696	81681.6	0.0402299	0.00431035	0.0416667	0.16954	0.0287356	0.0373563	0.0172414	0.0488506	0.100575	0.114943	0.0172414	0.045977	0.0445402	0.0387931	0.0287356	0.0632184	0.0560345	0.0344828	0.012931	0.0545977	1.0735	0.932	1.0009	0.5138	5.8204	-0.0818	2.1113	0.1465	1.0152	3.6624	0.2355	0.6614	2595	0.169942	0.303661	0.344123	0.182274	0.514066	0.647784	0.0235067	0.0412331	0.0732177	0.0292871
NP872348_NM002467	22867	EIF2C1	AGO1	NP872348.2	696	81681.6	0.0402299	0.00431035	0.0416667	0.16954	0.0287356	0.0373563	0.0172414	0.0488506	0.100575	0.114943	0.0172414	0.045977	0.0445402	0.0387931	0.0287356	0.0632184	0.0560345	0.0344828	0.012931	0.0545977	1.0735	0.932	1.0009	0.5138	5.8204	-0.0818	2.1113	0.1465	1.0152	3.6624	0.2355	0.6614	1365	0.240293	0.324542	0.262271	0.172894	0.502564	0.586813	0.047619	0.0659341	0.0871795	0.0249084
NP872348_NM021075	22867	EIF2C1	AGO1	NP872348.2	696	81681.6	0.0402299	0.00431035	0.0416667	0.16954	0.0287356	0.0373563	0.0172414	0.0488506	0.100575	0.114943	0.0172414	0.045977	0.0445402	0.0387931	0.0287356	0.0632184	0.0560345	0.0344828	0.012931	0.0545977	1.0735	0.932	1.0009	0.5138	5.8204	-0.0818	2.1113	0.1465	1.0152	3.6624	0.2355	0.6614	1422	0.292546	0.257384	0.267229	0.182841	0.559775	0.524613	0.07173	0.04782	0.109001	0.0351617
NP872348_NM001018139	22867	EIF2C1	AGO1	NP872348.2	696	81681.6	0.0402299	0.00431035	0.0416667	0.16954	0.0287356	0.0373563	0.0172414	0.0488506	0.100575	0.114943	0.0172414	0.045977	0.0445402	0.0387931	0.0287356	0.0632184	0.0560345	0.0344828	0.012931	0.0545977	1.0735	0.932	1.0009	0.5138	5.8204	-0.0818	2.1113	0.1465	1.0152	3.6624	0.2355	0.6614	459	0.252723	0.24183	0.296296	0.20915	0.54902	0.538126	0.0588235	0.0479303	0.0740741	0.0544662
NP872348_NM001034833	22867	EIF2C1	AGO1	NP872348.2	696	81681.6	0.0402299	0.00431035	0.0416667	0.16954	0.0287356	0.0373563	0.0172414	0.0488506	0.100575	0.114943	0.0172414	0.045977	0.0445402	0.0387931	0.0287356	0.0632184	0.0560345	0.0344828	0.012931	0.0545977	1.0735	0.932	1.0009	0.5138	5.8204	-0.0818	2.1113	0.1465	1.0152	3.6624	0.2355	0.6614	273	0.267399	0.285714	0.311355	0.135531	0.578755	0.59707	0.0659341	0.040293	0.0952381	0.029304
NP872348_NM015934	22867	EIF2C1	AGO1	NP872348.2	696	81681.6	0.0402299	0.00431035	0.0416667	0.16954	0.0287356	0.0373563	0.0172414	0.0488506	0.100575	0.114943	0.0172414	0.045977	0.0445402	0.0387931	0.0287356	0.0632184	0.0560345	0.0344828	0.012931	0.0545977	1.0735	0.932	1.0009	0.5138	5.8204	-0.0818	2.1113	0.1465	1.0152	3.6624	0.2355	0.6614	1590	0.366667	0.162264	0.233962	0.237107	0.600629	0.396226	0.107547	0.0421384	0.101258	0.0704403
NP872348_NM002520	22867	EIF2C1	AGO1	NP872348.2	696	81681.6	0.0402299	0.00431035	0.0416667	0.16954	0.0287356	0.0373563	0.0172414	0.0488506	0.100575	0.114943	0.0172414	0.045977	0.0445402	0.0387931	0.0287356	0.0632184	0.0560345	0.0344828	0.012931	0.0545977	1.0735	0.932	1.0009	0.5138	5.8204	-0.0818	2.1113	0.1465	1.0152	3.6624	0.2355	0.6614	885	0.357062	0.167232	0.253107	0.222599	0.610169	0.420339	0.102825	0.0451977	0.0960452	0.0734463
NP872348_NM002525	22867	EIF2C1	AGO1	NP872348.2	696	81681.6	0.0402299	0.00431035	0.0416667	0.16954	0.0287356	0.0373563	0.0172414	0.0488506	0.100575	0.114943	0.0172414	0.045977	0.0445402	0.0387931	0.0287356	0.0632184	0.0560345	0.0344828	0.012931	0.0545977	1.0735	0.932	1.0009	0.5138	5.8204	-0.0818	2.1113	0.1465	1.0152	3.6624	0.2355	0.6614	3660	0.296175	0.19918	0.243169	0.261475	0.539344	0.44235	0.0715847	0.0540984	0.0795082	0.0699454
NP872348_NM052935	22867	EIF2C1	AGO1	NP872348.2	696	81681.6	0.0402299	0.00431035	0.0416667	0.16954	0.0287356	0.0373563	0.0172414	0.0488506	0.100575	0.114943	0.0172414	0.045977	0.0445402	0.0387931	0.0287356	0.0632184	0.0560345	0.0344828	0.012931	0.0545977	1.0735	0.932	1.0009	0.5138	5.8204	-0.0818	2.1113	0.1465	1.0152	3.6624	0.2355	0.6614	903	0.264673	0.241417	0.267996	0.225914	0.532669	0.509413	0.0509413	0.0609081	0.0741971	0.0697674
NP872348_NM002568	22867	EIF2C1	AGO1	NP872348.2	696	81681.6	0.0402299	0.00431035	0.0416667	0.16954	0.0287356	0.0373563	0.0172414	0.0488506	0.100575	0.114943	0.0172414	0.045977	0.0445402	0.0387931	0.0287356	0.0632184	0.0560345	0.0344828	0.012931	0.0545977	1.0735	0.932	1.0009	0.5138	5.8204	-0.0818	2.1113	0.1465	1.0152	3.6624	0.2355	0.6614	1911	0.283621	0.238095	0.233909	0.244375	0.51753	0.472004	0.0680272	0.0538985	0.0737834	0.0643642
NP872348_NM015640	22867	EIF2C1	AGO1	NP872348.2	696	81681.6	0.0402299	0.00431035	0.0416667	0.16954	0.0287356	0.0373563	0.0172414	0.0488506	0.100575	0.114943	0.0172414	0.045977	0.0445402	0.0387931	0.0287356	0.0632184	0.0560345	0.0344828	0.012931	0.0545977	1.0735	0.932	1.0009	0.5138	5.8204	-0.0818	2.1113	0.1465	1.0152	3.6624	0.2355	0.6614	1164	0.302405	0.202749	0.31701	0.177835	0.619416	0.519759	0.0841924	0.0506873	0.0945017	0.0498282
NP872348_NM015932	22867	EIF2C1	AGO1	NP872348.2	696	81681.6	0.0402299	0.00431035	0.0416667	0.16954	0.0287356	0.0373563	0.0172414	0.0488506	0.100575	0.114943	0.0172414	0.045977	0.0445402	0.0387931	0.0287356	0.0632184	0.0560345	0.0344828	0.012931	0.0545977	1.0735	0.932	1.0009	0.5138	5.8204	-0.0818	2.1113	0.1465	1.0152	3.6624	0.2355	0.6614	426	0.305164	0.178404	0.20892	0.307512	0.514085	0.387324	0.0751174	0.0422535	0.0704225	0.0821596
NP872348_NM002698	22867	EIF2C1	AGO1	NP872348.2	696	81681.6	0.0402299	0.00431035	0.0416667	0.16954	0.0287356	0.0373563	0.0172414	0.0488506	0.100575	0.114943	0.0172414	0.045977	0.0445402	0.0387931	0.0287356	0.0632184	0.0560345	0.0344828	0.012931	0.0545977	1.0735	0.932	1.0009	0.5138	5.8204	-0.0818	2.1113	0.1465	1.0152	3.6624	0.2355	0.6614	1392	0.228448	0.365661	0.253592	0.152299	0.48204	0.619253	0.0416667	0.0596264	0.0883621	0.029454
NP872348_NM021154	22867	EIF2C1	AGO1	NP872348.2	696	81681.6	0.0402299	0.00431035	0.0416667	0.16954	0.0287356	0.0373563	0.0172414	0.0488506	0.100575	0.114943	0.0172414	0.045977	0.0445402	0.0387931	0.0287356	0.0632184	0.0560345	0.0344828	0.012931	0.0545977	1.0735	0.932	1.0009	0.5138	5.8204	-0.0818	2.1113	0.1465	1.0152	3.6624	0.2355	0.6614	975	0.253333	0.213333	0.264615	0.268718	0.517949	0.477949	0.0584615	0.0420513	0.0707692	0.0625641
NP872348_NM002789	22867	EIF2C1	AGO1	NP872348.2	696	81681.6	0.0402299	0.00431035	0.0416667	0.16954	0.0287356	0.0373563	0.0172414	0.0488506	0.100575	0.114943	0.0172414	0.045977	0.0445402	0.0387931	0.0287356	0.0632184	0.0560345	0.0344828	0.012931	0.0545977	1.0735	0.932	1.0009	0.5138	5.8204	-0.0818	2.1113	0.1465	1.0152	3.6624	0.2355	0.6614	786	0.346056	0.166667	0.234097	0.253181	0.580153	0.400763	0.0916031	0.0508906	0.0903308	0.0737913
NP872348_NM002823	22867	EIF2C1	AGO1	NP872348.2	696	81681.6	0.0402299	0.00431035	0.0416667	0.16954	0.0287356	0.0373563	0.0172414	0.0488506	0.100575	0.114943	0.0172414	0.045977	0.0445402	0.0387931	0.0287356	0.0632184	0.0560345	0.0344828	0.012931	0.0545977	1.0735	0.932	1.0009	0.5138	5.8204	-0.0818	2.1113	0.1465	1.0152	3.6624	0.2355	0.6614	333	0.366366	0.141141	0.375375	0.117117	0.741742	0.516517	0.0960961	0.048048	0.159159	0.0510511
NP872348_NM033315	22867	EIF2C1	AGO1	NP872348.2	696	81681.6	0.0402299	0.00431035	0.0416667	0.16954	0.0287356	0.0373563	0.0172414	0.0488506	0.100575	0.114943	0.0172414	0.045977	0.0445402	0.0387931	0.0287356	0.0632184	0.0560345	0.0344828	0.012931	0.0545977	1.0735	0.932	1.0009	0.5138	5.8204	-0.0818	2.1113	0.1465	1.0152	3.6624	0.2355	0.6614	612	0.183007	0.336601	0.292484	0.187908	0.47549	0.629085	0.0277778	0.0669935	0.0555556	0.0310458
NP872348_NM018211	22867	EIF2C1	AGO1	NP872348.2	696	81681.6	0.0402299	0.00431035	0.0416667	0.16954	0.0287356	0.0373563	0.0172414	0.0488506	0.100575	0.114943	0.0172414	0.045977	0.0445402	0.0387931	0.0287356	0.0632184	0.0560345	0.0344828	0.012931	0.0545977	1.0735	0.932	1.0009	0.5138	5.8204	-0.0818	2.1113	0.1465	1.0152	3.6624	0.2355	0.6614	2037	0.282769	0.225331	0.251841	0.240059	0.53461	0.477172	0.0648012	0.0505646	0.0795287	0.0643103
NP872348_NM000975	22867	EIF2C1	AGO1	NP872348.2	696	81681.6	0.0402299	0.00431035	0.0416667	0.16954	0.0287356	0.0373563	0.0172414	0.0488506	0.100575	0.114943	0.0172414	0.045977	0.0445402	0.0387931	0.0287356	0.0632184	0.0560345	0.0344828	0.012931	0.0545977	1.0735	0.932	1.0009	0.5138	5.8204	-0.0818	2.1113	0.1465	1.0152	3.6624	0.2355	0.6614	537	0.290503	0.214153	0.290503	0.204842	0.581006	0.504655	0.0633147	0.0484171	0.0931099	0.0577281
NP872348_NM002948	22867	EIF2C1	AGO1	NP872348.2	696	81681.6	0.0402299	0.00431035	0.0416667	0.16954	0.0287356	0.0373563	0.0172414	0.0488506	0.100575	0.114943	0.0172414	0.045977	0.0445402	0.0387931	0.0287356	0.0632184	0.0560345	0.0344828	0.012931	0.0545977	1.0735	0.932	1.0009	0.5138	5.8204	-0.0818	2.1113	0.1465	1.0152	3.6624	0.2355	0.6614	615	0.24065	0.274797	0.265041	0.219512	0.505691	0.539837	0.0471545	0.0504065	0.0780488	0.0471545
NP872348_NM000986	22867	EIF2C1	AGO1	NP872348.2	696	81681.6	0.0402299	0.00431035	0.0416667	0.16954	0.0287356	0.0373563	0.0172414	0.0488506	0.100575	0.114943	0.0172414	0.045977	0.0445402	0.0387931	0.0287356	0.0632184	0.0560345	0.0344828	0.012931	0.0545977	1.0735	0.932	1.0009	0.5138	5.8204	-0.0818	2.1113	0.1465	1.0152	3.6624	0.2355	0.6614	474	0.331224	0.219409	0.263713	0.185654	0.594937	0.483122	0.103376	0.0464135	0.103376	0.0379747
NP872348_NM000992	22867	EIF2C1	AGO1	NP872348.2	696	81681.6	0.0402299	0.00431035	0.0416667	0.16954	0.0287356	0.0373563	0.0172414	0.0488506	0.100575	0.114943	0.0172414	0.045977	0.0445402	0.0387931	0.0287356	0.0632184	0.0560345	0.0344828	0.012931	0.0545977	1.0735	0.932	1.0009	0.5138	5.8204	-0.0818	2.1113	0.1465	1.0152	3.6624	0.2355	0.6614	480	0.302083	0.30625	0.252083	0.139583	0.554167	0.558333	0.0895833	0.05	0.1	0.0354167
NP872348_NM021104	22867	EIF2C1	AGO1	NP872348.2	696	81681.6	0.0402299	0.00431035	0.0416667	0.16954	0.0287356	0.0373563	0.0172414	0.0488506	0.100575	0.114943	0.0172414	0.045977	0.0445402	0.0387931	0.0287356	0.0632184	0.0560345	0.0344828	0.012931	0.0545977	1.0735	0.932	1.0009	0.5138	5.8204	-0.0818	2.1113	0.1465	1.0152	3.6624	0.2355	0.6614	78	0.410256	0.141026	0.358974	0.0897436	0.769231	0.5	0.141026	0	0.192308	0.0384615
NP872348_NM000970	22867	EIF2C1	AGO1	NP872348.2	696	81681.6	0.0402299	0.00431035	0.0416667	0.16954	0.0287356	0.0373563	0.0172414	0.0488506	0.100575	0.114943	0.0172414	0.045977	0.0445402	0.0387931	0.0287356	0.0632184	0.0560345	0.0344828	0.012931	0.0545977	1.0735	0.932	1.0009	0.5138	5.8204	-0.0818	2.1113	0.1465	1.0152	3.6624	0.2355	0.6614	867	0.32526	0.226067	0.239908	0.208766	0.565167	0.465975	0.0922722	0.0530565	0.0865052	0.0519031
NP872348_NM000971	22867	EIF2C1	AGO1	NP872348.2	696	81681.6	0.0402299	0.00431035	0.0416667	0.16954	0.0287356	0.0373563	0.0172414	0.0488506	0.100575	0.114943	0.0172414	0.045977	0.0445402	0.0387931	0.0287356	0.0632184	0.0560345	0.0344828	0.012931	0.0545977	1.0735	0.932	1.0009	0.5138	5.8204	-0.0818	2.1113	0.1465	1.0152	3.6624	0.2355	0.6614	747	0.336011	0.180723	0.251673	0.231593	0.587684	0.432396	0.100402	0.0361446	0.0923695	0.0736278
NP872348_NM000661	22867	EIF2C1	AGO1	NP872348.2	696	81681.6	0.0402299	0.00431035	0.0416667	0.16954	0.0287356	0.0373563	0.0172414	0.0488506	0.100575	0.114943	0.0172414	0.045977	0.0445402	0.0387931	0.0287356	0.0632184	0.0560345	0.0344828	0.012931	0.0545977	1.0735	0.932	1.0009	0.5138	5.8204	-0.0818	2.1113	0.1465	1.0152	3.6624	0.2355	0.6614	579	0.309154	0.189983	0.243523	0.25734	0.552677	0.433506	0.0794473	0.0500864	0.0725389	0.0725389
NP872348_NM001015	22867	EIF2C1	AGO1	NP872348.2	696	81681.6	0.0402299	0.00431035	0.0416667	0.16954	0.0287356	0.0373563	0.0172414	0.0488506	0.100575	0.114943	0.0172414	0.045977	0.0445402	0.0387931	0.0287356	0.0632184	0.0560345	0.0344828	0.012931	0.0545977	1.0735	0.932	1.0009	0.5138	5.8204	-0.0818	2.1113	0.1465	1.0152	3.6624	0.2355	0.6614	477	0.268344	0.278826	0.268344	0.184486	0.536688	0.54717	0.0628931	0.0691824	0.0859539	0.0398323
NP872348_NM005617	22867	EIF2C1	AGO1	NP872348.2	696	81681.6	0.0402299	0.00431035	0.0416667	0.16954	0.0287356	0.0373563	0.0172414	0.0488506	0.100575	0.114943	0.0172414	0.045977	0.0445402	0.0387931	0.0287356	0.0632184	0.0560345	0.0344828	0.012931	0.0545977	1.0735	0.932	1.0009	0.5138	5.8204	-0.0818	2.1113	0.1465	1.0152	3.6624	0.2355	0.6614	456	0.236842	0.263158	0.300439	0.199561	0.537281	0.563596	0.0460526	0.0460526	0.0723684	0.0570175
NP872348_NM001020	22867	EIF2C1	AGO1	NP872348.2	696	81681.6	0.0402299	0.00431035	0.0416667	0.16954	0.0287356	0.0373563	0.0172414	0.0488506	0.100575	0.114943	0.0172414	0.045977	0.0445402	0.0387931	0.0287356	0.0632184	0.0560345	0.0344828	0.012931	0.0545977	1.0735	0.932	1.0009	0.5138	5.8204	-0.0818	2.1113	0.1465	1.0152	3.6624	0.2355	0.6614	441	0.226757	0.276644	0.290249	0.206349	0.517007	0.566893	0.0430839	0.0408163	0.0748299	0.047619
NP872348_NM033022	22867	EIF2C1	AGO1	NP872348.2	696	81681.6	0.0402299	0.00431035	0.0416667	0.16954	0.0287356	0.0373563	0.0172414	0.0488506	0.100575	0.114943	0.0172414	0.045977	0.0445402	0.0387931	0.0287356	0.0632184	0.0560345	0.0344828	0.012931	0.0545977	1.0735	0.932	1.0009	0.5138	5.8204	-0.0818	2.1113	0.1465	1.0152	3.6624	0.2355	0.6614	393	0.363868	0.201018	0.236641	0.198473	0.600509	0.437659	0.101781	0.0763359	0.0712468	0.0636132
NP872348_NM002954	22867	EIF2C1	AGO1	NP872348.2	696	81681.6	0.0402299	0.00431035	0.0416667	0.16954	0.0287356	0.0373563	0.0172414	0.0488506	0.100575	0.114943	0.0172414	0.045977	0.0445402	0.0387931	0.0287356	0.0632184	0.0560345	0.0344828	0.012931	0.0545977	1.0735	0.932	1.0009	0.5138	5.8204	-0.0818	2.1113	0.1465	1.0152	3.6624	0.2355	0.6614	471	0.314225	0.184713	0.250531	0.250531	0.564756	0.435244	0.0912951	0.0530786	0.0870488	0.059448
NP872348_NM015920	22867	EIF2C1	AGO1	NP872348.2	696	81681.6	0.0402299	0.00431035	0.0416667	0.16954	0.0287356	0.0373563	0.0172414	0.0488506	0.100575	0.114943	0.0172414	0.045977	0.0445402	0.0387931	0.0287356	0.0632184	0.0560345	0.0344828	0.012931	0.0545977	1.0735	0.932	1.0009	0.5138	5.8204	-0.0818	2.1113	0.1465	1.0152	3.6624	0.2355	0.6614	255	0.333333	0.192157	0.223529	0.25098	0.556863	0.415686	0.0823529	0.0627451	0.0980392	0.0431373
NP872348_NM001006	22867	EIF2C1	AGO1	NP872348.2	696	81681.6	0.0402299	0.00431035	0.0416667	0.16954	0.0287356	0.0373563	0.0172414	0.0488506	0.100575	0.114943	0.0172414	0.045977	0.0445402	0.0387931	0.0287356	0.0632184	0.0560345	0.0344828	0.012931	0.0545977	1.0735	0.932	1.0009	0.5138	5.8204	-0.0818	2.1113	0.1465	1.0152	3.6624	0.2355	0.6614	795	0.330818	0.179874	0.245283	0.244025	0.576101	0.425157	0.0981132	0.045283	0.0754717	0.072956
NP872348_NM001010	22867	EIF2C1	AGO1	NP872348.2	696	81681.6	0.0402299	0.00431035	0.0416667	0.16954	0.0287356	0.0373563	0.0172414	0.0488506	0.100575	0.114943	0.0172414	0.045977	0.0445402	0.0387931	0.0287356	0.0632184	0.0560345	0.0344828	0.012931	0.0545977	1.0735	0.932	1.0009	0.5138	5.8204	-0.0818	2.1113	0.1465	1.0152	3.6624	0.2355	0.6614	750	0.312	0.216	0.254667	0.217333	0.566667	0.470667	0.0893333	0.048	0.0933333	0.0466667
NP872348_NM003707	22867	EIF2C1	AGO1	NP872348.2	696	81681.6	0.0402299	0.00431035	0.0416667	0.16954	0.0287356	0.0373563	0.0172414	0.0488506	0.100575	0.114943	0.0172414	0.045977	0.0445402	0.0387931	0.0287356	0.0632184	0.0560345	0.0344828	0.012931	0.0545977	1.0735	0.932	1.0009	0.5138	5.8204	-0.0818	2.1113	0.1465	1.0152	3.6624	0.2355	0.6614	1371	0.291758	0.227571	0.285193	0.195478	0.576951	0.512764	0.0671043	0.0547046	0.0926331	0.0583516
NP872348_NM005063	22867	EIF2C1	AGO1	NP872348.2	696	81681.6	0.0402299	0.00431035	0.0416667	0.16954	0.0287356	0.0373563	0.0172414	0.0488506	0.100575	0.114943	0.0172414	0.045977	0.0445402	0.0387931	0.0287356	0.0632184	0.0560345	0.0344828	0.012931	0.0545977	1.0735	0.932	1.0009	0.5138	5.8204	-0.0818	2.1113	0.1465	1.0152	3.6624	0.2355	0.6614	1080	0.235185	0.274074	0.235185	0.255556	0.47037	0.509259	0.0425926	0.0666667	0.0527778	0.0601852
NP872348_NM005066	22867	EIF2C1	AGO1	NP872348.2	696	81681.6	0.0402299	0.00431035	0.0416667	0.16954	0.0287356	0.0373563	0.0172414	0.0488506	0.100575	0.114943	0.0172414	0.045977	0.0445402	0.0387931	0.0287356	0.0632184	0.0560345	0.0344828	0.012931	0.0545977	1.0735	0.932	1.0009	0.5138	5.8204	-0.0818	2.1113	0.1465	1.0152	3.6624	0.2355	0.6614	2124	0.255179	0.278719	0.293315	0.172787	0.548493	0.572034	0.0588512	0.0461394	0.0819209	0.0484934
NP872348_NM006049	22867	EIF2C1	AGO1	NP872348.2	696	81681.6	0.0402299	0.00431035	0.0416667	0.16954	0.0287356	0.0373563	0.0172414	0.0488506	0.100575	0.114943	0.0172414	0.045977	0.0445402	0.0387931	0.0287356	0.0632184	0.0560345	0.0344828	0.012931	0.0545977	1.0735	0.932	1.0009	0.5138	5.8204	-0.0818	2.1113	0.1465	1.0152	3.6624	0.2355	0.6614	297	0.316498	0.215488	0.286195	0.181818	0.602694	0.501684	0.0808081	0.0538721	0.114478	0.0572391
NP872348_NM003142	22867	EIF2C1	AGO1	NP872348.2	696	81681.6	0.0402299	0.00431035	0.0416667	0.16954	0.0287356	0.0373563	0.0172414	0.0488506	0.100575	0.114943	0.0172414	0.045977	0.0445402	0.0387931	0.0287356	0.0632184	0.0560345	0.0344828	0.012931	0.0545977	1.0735	0.932	1.0009	0.5138	5.8204	-0.0818	2.1113	0.1465	1.0152	3.6624	0.2355	0.6614	1227	0.414833	0.140179	0.227384	0.217604	0.642217	0.367563	0.136919	0.0480848	0.0953545	0.0766096
NP872348_NM005563	22867	EIF2C1	AGO1	NP872348.2	696	81681.6	0.0402299	0.00431035	0.0416667	0.16954	0.0287356	0.0373563	0.0172414	0.0488506	0.100575	0.114943	0.0172414	0.045977	0.0445402	0.0387931	0.0287356	0.0632184	0.0560345	0.0344828	0.012931	0.0545977	1.0735	0.932	1.0009	0.5138	5.8204	-0.0818	2.1113	0.1465	1.0152	3.6624	0.2355	0.6614	450	0.364444	0.206667	0.255556	0.173333	0.62	0.462222	0.115556	0.0444444	0.126667	0.04
NP872348_NM024863	22867	EIF2C1	AGO1	NP872348.2	696	81681.6	0.0402299	0.00431035	0.0416667	0.16954	0.0287356	0.0373563	0.0172414	0.0488506	0.100575	0.114943	0.0172414	0.045977	0.0445402	0.0387931	0.0287356	0.0632184	0.0560345	0.0344828	0.012931	0.0545977	1.0735	0.932	1.0009	0.5138	5.8204	-0.0818	2.1113	0.1465	1.0152	3.6624	0.2355	0.6614	648	0.402778	0.140432	0.313272	0.143519	0.716049	0.453704	0.106481	0.0432099	0.149691	0.0540123
NP872348_NM005648	22867	EIF2C1	AGO1	NP872348.2	696	81681.6	0.0402299	0.00431035	0.0416667	0.16954	0.0287356	0.0373563	0.0172414	0.0488506	0.100575	0.114943	0.0172414	0.045977	0.0445402	0.0387931	0.0287356	0.0632184	0.0560345	0.0344828	0.012931	0.0545977	1.0735	0.932	1.0009	0.5138	5.8204	-0.0818	2.1113	0.1465	1.0152	3.6624	0.2355	0.6614	339	0.312684	0.188791	0.230088	0.268437	0.542773	0.418879	0.0707965	0.0560472	0.0619469	0.0973451
NP872348_NM016639	22867	EIF2C1	AGO1	NP872348.2	696	81681.6	0.0402299	0.00431035	0.0416667	0.16954	0.0287356	0.0373563	0.0172414	0.0488506	0.100575	0.114943	0.0172414	0.045977	0.0445402	0.0387931	0.0287356	0.0632184	0.0560345	0.0344828	0.012931	0.0545977	1.0735	0.932	1.0009	0.5138	5.8204	-0.0818	2.1113	0.1465	1.0152	3.6624	0.2355	0.6614	390	0.117949	0.333333	0.353846	0.194872	0.471795	0.687179	0.00769231	0.0333333	0.0589744	0.0153846
NP872348_NM003295	22867	EIF2C1	AGO1	NP872348.2	696	81681.6	0.0402299	0.00431035	0.0416667	0.16954	0.0287356	0.0373563	0.0172414	0.0488506	0.100575	0.114943	0.0172414	0.045977	0.0445402	0.0387931	0.0287356	0.0632184	0.0560345	0.0344828	0.012931	0.0545977	1.0735	0.932	1.0009	0.5138	5.8204	-0.0818	2.1113	0.1465	1.0152	3.6624	0.2355	0.6614	519	0.32948	0.192678	0.248555	0.229287	0.578035	0.441233	0.0789981	0.061657	0.0732177	0.0809249
NP872348_NM003375	22867	EIF2C1	AGO1	NP872348.2	696	81681.6	0.0402299	0.00431035	0.0416667	0.16954	0.0287356	0.0373563	0.0172414	0.0488506	0.100575	0.114943	0.0172414	0.045977	0.0445402	0.0387931	0.0287356	0.0632184	0.0560345	0.0344828	0.012931	0.0545977	1.0735	0.932	1.0009	0.5138	5.8204	-0.0818	2.1113	0.1465	1.0152	3.6624	0.2355	0.6614	885	0.281356	0.19887	0.247458	0.272316	0.528814	0.446328	0.0655367	0.0700565	0.0644068	0.0564972
NP872348_NM015420	22867	EIF2C1	AGO1	NP872348.2	696	81681.6	0.0402299	0.00431035	0.0416667	0.16954	0.0287356	0.0373563	0.0172414	0.0488506	0.100575	0.114943	0.0172414	0.045977	0.0445402	0.0387931	0.0287356	0.0632184	0.0560345	0.0344828	0.012931	0.0545977	1.0735	0.932	1.0009	0.5138	5.8204	-0.0818	2.1113	0.1465	1.0152	3.6624	0.2355	0.6614	1794	0.293757	0.210145	0.259197	0.236901	0.552954	0.469342	0.0691193	0.0568562	0.0752508	0.0696767
NP872348_NM032345	22867	EIF2C1	AGO1	NP872348.2	696	81681.6	0.0402299	0.00431035	0.0416667	0.16954	0.0287356	0.0373563	0.0172414	0.0488506	0.100575	0.114943	0.0172414	0.045977	0.0445402	0.0387931	0.0287356	0.0632184	0.0560345	0.0344828	0.012931	0.0545977	1.0735	0.932	1.0009	0.5138	5.8204	-0.0818	2.1113	0.1465	1.0152	3.6624	0.2355	0.6614	615	0.297561	0.256911	0.308943	0.136585	0.606504	0.565854	0.0666667	0.0439024	0.144715	0.0211382
NP872348_NM004559	22867	EIF2C1	AGO1	NP872348.2	696	81681.6	0.0402299	0.00431035	0.0416667	0.16954	0.0287356	0.0373563	0.0172414	0.0488506	0.100575	0.114943	0.0172414	0.045977	0.0445402	0.0387931	0.0287356	0.0632184	0.0560345	0.0344828	0.012931	0.0545977	1.0735	0.932	1.0009	0.5138	5.8204	-0.0818	2.1113	0.1465	1.0152	3.6624	0.2355	0.6614	975	0.288205	0.267692	0.297436	0.146667	0.585641	0.565128	0.0666667	0.0605128	0.101538	0.0441026
NP872348_NM030799	22867	EIF2C1	AGO1	NP872348.2	696	81681.6	0.0402299	0.00431035	0.0416667	0.16954	0.0287356	0.0373563	0.0172414	0.0488506	0.100575	0.114943	0.0172414	0.045977	0.0445402	0.0387931	0.0287356	0.0632184	0.0560345	0.0344828	0.012931	0.0545977	1.0735	0.932	1.0009	0.5138	5.8204	-0.0818	2.1113	0.1465	1.0152	3.6624	0.2355	0.6614	774	0.26615	0.20155	0.217054	0.315245	0.483204	0.418605	0.0465116	0.0490956	0.0684755	0.0865633
NP003676_NM002107	8570	KHSRP	KSRP	NP003676.2	711	73111.7	0.0829817	0.00703235	0.04782	0.0393812	0.0168776	0.185654	0.0154712	0.0562588	0.0436006	0.0281294	0.0196906	0.0281294	0.147679	0.0886076	0.0421941	0.045007	0.0295359	0.0365682	0.00984529	0.0295359	0.9164	0.904	1.1515	0.48	6.0586	-0.0014	1.4427	0.1012	1.0146	2.8086	0.2031	0.4369	411	0.26764	0.262774	0.253041	0.216545	0.520681	0.515815	0.0656934	0.0608273	0.0729927	0.0389294
NP003676_NM000516	8570	KHSRP	KSRP	NP003676.2	711	73111.7	0.0829817	0.00703235	0.04782	0.0393812	0.0168776	0.185654	0.0154712	0.0562588	0.0436006	0.0281294	0.0196906	0.0281294	0.147679	0.0886076	0.0421941	0.045007	0.0295359	0.0365682	0.00984529	0.0295359	0.9164	0.904	1.1515	0.48	6.0586	-0.0014	1.4427	0.1012	1.0146	2.8086	0.2031	0.4369	1185	0.253165	0.268354	0.2827	0.195781	0.535865	0.551055	0.0531646	0.0658228	0.0801688	0.0438819
NP003676_NM001034955	8570	KHSRP	KSRP	NP003676.2	711	73111.7	0.0829817	0.00703235	0.04782	0.0393812	0.0168776	0.185654	0.0154712	0.0562588	0.0436006	0.0281294	0.0196906	0.0281294	0.147679	0.0886076	0.0421941	0.045007	0.0295359	0.0365682	0.00984529	0.0295359	0.9164	0.904	1.1515	0.48	6.0586	-0.0014	1.4427	0.1012	1.0146	2.8086	0.2031	0.4369	3456	0.285301	0.26331	0.23669	0.214699	0.521991	0.5	0.0596065	0.0584491	0.0920139	0.052662
NP003676_NM002136	8570	KHSRP	KSRP	NP003676.2	711	73111.7	0.0829817	0.00703235	0.04782	0.0393812	0.0168776	0.185654	0.0154712	0.0562588	0.0436006	0.0281294	0.0196906	0.0281294	0.147679	0.0886076	0.0421941	0.045007	0.0295359	0.0365682	0.00984529	0.0295359	0.9164	0.904	1.1515	0.48	6.0586	-0.0014	1.4427	0.1012	1.0146	2.8086	0.2031	0.4369	963	0.286604	0.17134	0.303219	0.238837	0.589823	0.474559	0.0737279	0.0446521	0.086189	0.0581516
NP003676_NM018211	8570	KHSRP	KSRP	NP003676.2	711	73111.7	0.0829817	0.00703235	0.04782	0.0393812	0.0168776	0.185654	0.0154712	0.0562588	0.0436006	0.0281294	0.0196906	0.0281294	0.147679	0.0886076	0.0421941	0.045007	0.0295359	0.0365682	0.00984529	0.0295359	0.9164	0.904	1.1515	0.48	6.0586	-0.0014	1.4427	0.1012	1.0146	2.8086	0.2031	0.4369	2037	0.282769	0.225331	0.251841	0.240059	0.53461	0.477172	0.0648012	0.0505646	0.0795287	0.0643103
NP003676_NM002715	8570	KHSRP	KSRP	NP003676.2	711	73111.7	0.0829817	0.00703235	0.04782	0.0393812	0.0168776	0.185654	0.0154712	0.0562588	0.0436006	0.0281294	0.0196906	0.0281294	0.147679	0.0886076	0.0421941	0.045007	0.0295359	0.0365682	0.00984529	0.0295359	0.9164	0.904	1.1515	0.48	6.0586	-0.0014	1.4427	0.1012	1.0146	2.8086	0.2031	0.4369	930	0.269892	0.205376	0.243011	0.28172	0.512903	0.448387	0.0505376	0.055914	0.0709677	0.0784946
NP003676_NM002823	8570	KHSRP	KSRP	NP003676.2	711	73111.7	0.0829817	0.00703235	0.04782	0.0393812	0.0168776	0.185654	0.0154712	0.0562588	0.0436006	0.0281294	0.0196906	0.0281294	0.147679	0.0886076	0.0421941	0.045007	0.0295359	0.0365682	0.00984529	0.0295359	0.9164	0.904	1.1515	0.48	6.0586	-0.0014	1.4427	0.1012	1.0146	2.8086	0.2031	0.4369	333	0.366366	0.141141	0.375375	0.117117	0.741742	0.516517	0.0960961	0.048048	0.159159	0.0510511
NP003676_NM002137	8570	KHSRP	KSRP	NP003676.2	711	73111.7	0.0829817	0.00703235	0.04782	0.0393812	0.0168776	0.185654	0.0154712	0.0562588	0.0436006	0.0281294	0.0196906	0.0281294	0.147679	0.0886076	0.0421941	0.045007	0.0295359	0.0365682	0.00984529	0.0295359	0.9164	0.904	1.1515	0.48	6.0586	-0.0014	1.4427	0.1012	1.0146	2.8086	0.2031	0.4369	1026	0.306043	0.133528	0.319688	0.240741	0.625731	0.453216	0.0730994	0.045809	0.0925926	0.0721248
NP003676_NM006476	8570	KHSRP	KSRP	NP003676.2	711	73111.7	0.0829817	0.00703235	0.04782	0.0393812	0.0168776	0.185654	0.0154712	0.0562588	0.0436006	0.0281294	0.0196906	0.0281294	0.147679	0.0886076	0.0421941	0.045007	0.0295359	0.0365682	0.00984529	0.0295359	0.9164	0.904	1.1515	0.48	6.0586	-0.0014	1.4427	0.1012	1.0146	2.8086	0.2031	0.4369	312	0.233974	0.217949	0.278846	0.269231	0.512821	0.496795	0.0480769	0.0416667	0.0737179	0.0544872
NP003676_NM002136	8570	KHSRP	KSRP	NP003676.2	711	73111.7	0.0829817	0.00703235	0.04782	0.0393812	0.0168776	0.185654	0.0154712	0.0562588	0.0436006	0.0281294	0.0196906	0.0281294	0.147679	0.0886076	0.0421941	0.045007	0.0295359	0.0365682	0.00984529	0.0295359	0.9164	0.904	1.1515	0.48	6.0586	-0.0014	1.4427	0.1012	1.0146	2.8086	0.2031	0.4369	963	0.286604	0.17134	0.303219	0.238837	0.589823	0.474559	0.0737279	0.0446521	0.086189	0.0581516
NP003676_NM005665	8570	KHSRP	KSRP	NP003676.2	711	73111.7	0.0829817	0.00703235	0.04782	0.0393812	0.0168776	0.185654	0.0154712	0.0562588	0.0436006	0.0281294	0.0196906	0.0281294	0.147679	0.0886076	0.0421941	0.045007	0.0295359	0.0365682	0.00984529	0.0295359	0.9164	0.904	1.1515	0.48	6.0586	-0.0014	1.4427	0.1012	1.0146	2.8086	0.2031	0.4369	2433	0.341965	0.184957	0.224414	0.248664	0.566379	0.409371	0.0904233	0.0567201	0.0986436	0.0678175
NP036286_NM015933	27161	EIF2C2	AGO2	NP036286.2	859	97203.3	0.0628638	0.0256112	0.0454016	0.0477299	0.0454016	0.0616997	0.0372526	0.0558789	0.0616997	0.0710128	0.024447	0.0256112	0.0675204	0.0663562	0.0663562	0.0512224	0.0628638	0.0814901	0.00698487	0.032596	1.0045	1.023	0.9946	0.5409	6.1991	0.0349	1.9325	0.1653	0.9978	3.4682	0.2015	0.6698	195	0.384615	0.189744	0.328205	0.0974359	0.712821	0.517949	0.133333	0.0307692	0.14359	0.025641
NP036286_NM003418	27161	EIF2C2	AGO2	NP036286.2	859	97203.3	0.0628638	0.0256112	0.0454016	0.0477299	0.0454016	0.0616997	0.0372526	0.0558789	0.0616997	0.0710128	0.024447	0.0256112	0.0675204	0.0663562	0.0663562	0.0512224	0.0628638	0.0814901	0.00698487	0.032596	1.0045	1.023	0.9946	0.5409	6.1991	0.0349	1.9325	0.1653	0.9978	3.4682	0.2015	0.6698	534	0.250936	0.217228	0.299625	0.23221	0.550562	0.516854	0.0524345	0.0486891	0.0861423	0.0505618
NP036286_NM001905	27161	EIF2C2	AGO2	NP036286.2	859	97203.3	0.0628638	0.0256112	0.0454016	0.0477299	0.0454016	0.0616997	0.0372526	0.0558789	0.0616997	0.0710128	0.024447	0.0256112	0.0675204	0.0663562	0.0663562	0.0512224	0.0628638	0.0814901	0.00698487	0.032596	1.0045	1.023	0.9946	0.5409	6.1991	0.0349	1.9325	0.1653	0.9978	3.4682	0.2015	0.6698	1776	0.27759	0.219595	0.258446	0.244369	0.536036	0.478041	0.0641892	0.053491	0.0816441	0.0613739
NP036286_NM014740	27161	EIF2C2	AGO2	NP036286.2	859	97203.3	0.0628638	0.0256112	0.0454016	0.0477299	0.0454016	0.0616997	0.0372526	0.0558789	0.0616997	0.0710128	0.024447	0.0256112	0.0675204	0.0663562	0.0663562	0.0512224	0.0628638	0.0814901	0.00698487	0.032596	1.0045	1.023	0.9946	0.5409	6.1991	0.0349	1.9325	0.1653	0.9978	3.4682	0.2015	0.6698	1236	0.270227	0.234628	0.272654	0.222492	0.54288	0.507282	0.0493528	0.0598706	0.0752427	0.0687702
NP036286_NM003859	27161	EIF2C2	AGO2	NP036286.2	859	97203.3	0.0628638	0.0256112	0.0454016	0.0477299	0.0454016	0.0616997	0.0372526	0.0558789	0.0616997	0.0710128	0.024447	0.0256112	0.0675204	0.0663562	0.0663562	0.0512224	0.0628638	0.0814901	0.00698487	0.032596	1.0045	1.023	0.9946	0.5409	6.1991	0.0349	1.9325	0.1653	0.9978	3.4682	0.2015	0.6698	783	0.314176	0.16986	0.242656	0.273308	0.556833	0.412516	0.0779055	0.0434227	0.0740741	0.0893997
NP036286_NM006824	27161	EIF2C2	AGO2	NP036286.2	859	97203.3	0.0628638	0.0256112	0.0454016	0.0477299	0.0454016	0.0616997	0.0372526	0.0558789	0.0616997	0.0710128	0.024447	0.0256112	0.0675204	0.0663562	0.0663562	0.0512224	0.0628638	0.0814901	0.00698487	0.032596	1.0045	1.023	0.9946	0.5409	6.1991	0.0349	1.9325	0.1653	0.9978	3.4682	0.2015	0.6698	921	0.310532	0.219327	0.290988	0.179153	0.60152	0.510315	0.0760043	0.0445168	0.110749	0.0510315
NP036286_NM001402	27161	EIF2C2	AGO2	NP036286.2	859	97203.3	0.0628638	0.0256112	0.0454016	0.0477299	0.0454016	0.0616997	0.0372526	0.0558789	0.0616997	0.0710128	0.024447	0.0256112	0.0675204	0.0663562	0.0663562	0.0512224	0.0628638	0.0814901	0.00698487	0.032596	1.0045	1.023	0.9946	0.5409	6.1991	0.0349	1.9325	0.1653	0.9978	3.4682	0.2015	0.6698	1389	0.269978	0.219582	0.262059	0.24838	0.532037	0.481641	0.0676746	0.0539957	0.062635	0.062635
NP036286_NM001404	27161	EIF2C2	AGO2	NP036286.2	859	97203.3	0.0628638	0.0256112	0.0454016	0.0477299	0.0454016	0.0616997	0.0372526	0.0558789	0.0616997	0.0710128	0.024447	0.0256112	0.0675204	0.0663562	0.0663562	0.0512224	0.0628638	0.0814901	0.00698487	0.032596	1.0045	1.023	0.9946	0.5409	6.1991	0.0349	1.9325	0.1653	0.9978	3.4682	0.2015	0.6698	1314	0.235921	0.262557	0.282344	0.219178	0.518265	0.544901	0.0479452	0.0517504	0.0837139	0.0403349
NP036286_NM005801	27161	EIF2C2	AGO2	NP036286.2	859	97203.3	0.0628638	0.0256112	0.0454016	0.0477299	0.0454016	0.0616997	0.0372526	0.0558789	0.0616997	0.0710128	0.024447	0.0256112	0.0675204	0.0663562	0.0663562	0.0512224	0.0628638	0.0814901	0.00698487	0.032596	1.0045	1.023	0.9946	0.5409	6.1991	0.0349	1.9325	0.1653	0.9978	3.4682	0.2015	0.6698	342	0.307018	0.204678	0.24269	0.245614	0.549708	0.447368	0.0789474	0.0555556	0.0789474	0.0730994
NP036286_NM003756	27161	EIF2C2	AGO2	NP036286.2	859	97203.3	0.0628638	0.0256112	0.0454016	0.0477299	0.0454016	0.0616997	0.0372526	0.0558789	0.0616997	0.0710128	0.024447	0.0256112	0.0675204	0.0663562	0.0663562	0.0512224	0.0628638	0.0814901	0.00698487	0.032596	1.0045	1.023	0.9946	0.5409	6.1991	0.0349	1.9325	0.1653	0.9978	3.4682	0.2015	0.6698	1059	0.31067	0.234183	0.227573	0.227573	0.538244	0.461756	0.0745987	0.0538244	0.0840415	0.0698772
NP036286_NM020189	27161	EIF2C2	AGO2	NP036286.2	859	97203.3	0.0628638	0.0256112	0.0454016	0.0477299	0.0454016	0.0616997	0.0372526	0.0558789	0.0616997	0.0710128	0.024447	0.0256112	0.0675204	0.0663562	0.0663562	0.0512224	0.0628638	0.0814901	0.00698487	0.032596	1.0045	1.023	0.9946	0.5409	6.1991	0.0349	1.9325	0.1653	0.9978	3.4682	0.2015	0.6698	306	0.369281	0.166667	0.25817	0.205882	0.627451	0.424837	0.101307	0.0522876	0.114379	0.0522876
NP036286_NM001444	27161	EIF2C2	AGO2	NP036286.2	859	97203.3	0.0628638	0.0256112	0.0454016	0.0477299	0.0454016	0.0616997	0.0372526	0.0558789	0.0616997	0.0710128	0.024447	0.0256112	0.0675204	0.0663562	0.0663562	0.0512224	0.0628638	0.0814901	0.00698487	0.032596	1.0045	1.023	0.9946	0.5409	6.1991	0.0349	1.9325	0.1653	0.9978	3.4682	0.2015	0.6698	408	0.348039	0.164216	0.272059	0.215686	0.620098	0.436275	0.0931373	0.0563725	0.0882353	0.0661765
NP036286_NM000165	27161	EIF2C2	AGO2	NP036286.2	859	97203.3	0.0628638	0.0256112	0.0454016	0.0477299	0.0454016	0.0616997	0.0372526	0.0558789	0.0616997	0.0710128	0.024447	0.0256112	0.0675204	0.0663562	0.0663562	0.0512224	0.0628638	0.0814901	0.00698487	0.032596	1.0045	1.023	0.9946	0.5409	6.1991	0.0349	1.9325	0.1653	0.9978	3.4682	0.2015	0.6698	1149	0.253264	0.24282	0.246301	0.257615	0.499565	0.489121	0.0626632	0.051349	0.0678851	0.0548303
NP036286_NM002065	27161	EIF2C2	AGO2	NP036286.2	859	97203.3	0.0628638	0.0256112	0.0454016	0.0477299	0.0454016	0.0616997	0.0372526	0.0558789	0.0616997	0.0710128	0.024447	0.0256112	0.0675204	0.0663562	0.0663562	0.0512224	0.0628638	0.0814901	0.00698487	0.032596	1.0045	1.023	0.9946	0.5409	6.1991	0.0349	1.9325	0.1653	0.9978	3.4682	0.2015	0.6698	1122	0.245098	0.254902	0.275401	0.224599	0.520499	0.530303	0.0508021	0.0543672	0.0730838	0.0579323
NP036286_NM006118	27161	EIF2C2	AGO2	NP036286.2	859	97203.3	0.0628638	0.0256112	0.0454016	0.0477299	0.0454016	0.0616997	0.0372526	0.0558789	0.0616997	0.0710128	0.024447	0.0256112	0.0675204	0.0663562	0.0663562	0.0512224	0.0628638	0.0814901	0.00698487	0.032596	1.0045	1.023	0.9946	0.5409	6.1991	0.0349	1.9325	0.1653	0.9978	3.4682	0.2015	0.6698	840	0.238095	0.258333	0.279762	0.22381	0.517857	0.538095	0.0333333	0.0511905	0.0928571	0.0583333
NP036286_NM002128	27161	EIF2C2	AGO2	NP036286.2	859	97203.3	0.0628638	0.0256112	0.0454016	0.0477299	0.0454016	0.0616997	0.0372526	0.0558789	0.0616997	0.0710128	0.024447	0.0256112	0.0675204	0.0663562	0.0663562	0.0512224	0.0628638	0.0814901	0.00698487	0.032596	1.0045	1.023	0.9946	0.5409	6.1991	0.0349	1.9325	0.1653	0.9978	3.4682	0.2015	0.6698	648	0.37963	0.158951	0.277778	0.183642	0.657407	0.436728	0.118827	0.0200617	0.123457	0.0709877
NP036286_NM031243	27161	EIF2C2	AGO2	NP036286.2	859	97203.3	0.0628638	0.0256112	0.0454016	0.0477299	0.0454016	0.0616997	0.0372526	0.0558789	0.0616997	0.0710128	0.024447	0.0256112	0.0675204	0.0663562	0.0663562	0.0512224	0.0628638	0.0814901	0.00698487	0.032596	1.0045	1.023	0.9946	0.5409	6.1991	0.0349	1.9325	0.1653	0.9978	3.4682	0.2015	0.6698	1062	0.309793	0.132768	0.316384	0.241055	0.626177	0.449153	0.0753296	0.0461394	0.0932203	0.0696798
NP036286_NM013417	27161	EIF2C2	AGO2	NP036286.2	859	97203.3	0.0628638	0.0256112	0.0454016	0.0477299	0.0454016	0.0616997	0.0372526	0.0558789	0.0616997	0.0710128	0.024447	0.0256112	0.0675204	0.0663562	0.0663562	0.0512224	0.0628638	0.0814901	0.00698487	0.032596	1.0045	1.023	0.9946	0.5409	6.1991	0.0349	1.9325	0.1653	0.9978	3.4682	0.2015	0.6698	3789	0.290314	0.207707	0.235682	0.266297	0.525996	0.443389	0.0683558	0.0580628	0.0749538	0.0659805
NP036286_NM139207	27161	EIF2C2	AGO2	NP036286.2	859	97203.3	0.0628638	0.0256112	0.0454016	0.0477299	0.0454016	0.0616997	0.0372526	0.0558789	0.0616997	0.0710128	0.024447	0.0256112	0.0675204	0.0663562	0.0663562	0.0512224	0.0628638	0.0814901	0.00698487	0.032596	1.0045	1.023	0.9946	0.5409	6.1991	0.0349	1.9325	0.1653	0.9978	3.4682	0.2015	0.6698	1176	0.357993	0.153061	0.238095	0.25085	0.596088	0.391156	0.10119	0.047619	0.0969388	0.0782313
NP036286_NM000270	27161	EIF2C2	AGO2	NP036286.2	859	97203.3	0.0628638	0.0256112	0.0454016	0.0477299	0.0454016	0.0616997	0.0372526	0.0558789	0.0616997	0.0710128	0.024447	0.0256112	0.0675204	0.0663562	0.0663562	0.0512224	0.0628638	0.0814901	0.00698487	0.032596	1.0045	1.023	0.9946	0.5409	6.1991	0.0349	1.9325	0.1653	0.9978	3.4682	0.2015	0.6698	870	0.256322	0.233333	0.272414	0.237931	0.528736	0.505747	0.0494253	0.0609195	0.0781609	0.0563218
NP036286_NM002520	27161	EIF2C2	AGO2	NP036286.2	859	97203.3	0.0628638	0.0256112	0.0454016	0.0477299	0.0454016	0.0616997	0.0372526	0.0558789	0.0616997	0.0710128	0.024447	0.0256112	0.0675204	0.0663562	0.0663562	0.0512224	0.0628638	0.0814901	0.00698487	0.032596	1.0045	1.023	0.9946	0.5409	6.1991	0.0349	1.9325	0.1653	0.9978	3.4682	0.2015	0.6698	885	0.357062	0.167232	0.253107	0.222599	0.610169	0.420339	0.102825	0.0451977	0.0960452	0.0734463
NP036286_NM004152	27161	EIF2C2	AGO2	NP036286.2	859	97203.3	0.0628638	0.0256112	0.0454016	0.0477299	0.0454016	0.0616997	0.0372526	0.0558789	0.0616997	0.0710128	0.024447	0.0256112	0.0675204	0.0663562	0.0663562	0.0512224	0.0628638	0.0814901	0.00698487	0.032596	1.0045	1.023	0.9946	0.5409	6.1991	0.0349	1.9325	0.1653	0.9978	3.4682	0.2015	0.6698	688	0.226744	0.302326	0.284884	0.186047	0.511628	0.587209	0.0377907	0.0537791	0.0944767	0.0363372
NP036286_NM002568	27161	EIF2C2	AGO2	NP036286.2	859	97203.3	0.0628638	0.0256112	0.0454016	0.0477299	0.0454016	0.0616997	0.0372526	0.0558789	0.0616997	0.0710128	0.024447	0.0256112	0.0675204	0.0663562	0.0663562	0.0512224	0.0628638	0.0814901	0.00698487	0.032596	1.0045	1.023	0.9946	0.5409	6.1991	0.0349	1.9325	0.1653	0.9978	3.4682	0.2015	0.6698	1911	0.283621	0.238095	0.233909	0.244375	0.51753	0.472004	0.0680272	0.0538985	0.0737834	0.0643642
NP036286_NM004643	27161	EIF2C2	AGO2	NP036286.2	859	97203.3	0.0628638	0.0256112	0.0454016	0.0477299	0.0454016	0.0616997	0.0372526	0.0558789	0.0616997	0.0710128	0.024447	0.0256112	0.0675204	0.0663562	0.0663562	0.0512224	0.0628638	0.0814901	0.00698487	0.032596	1.0045	1.023	0.9946	0.5409	6.1991	0.0349	1.9325	0.1653	0.9978	3.4682	0.2015	0.6698	921	0.219327	0.269273	0.353963	0.157438	0.57329	0.623236	0.0380022	0.0423453	0.0944625	0.0358306
NP036286_NM145859	27161	EIF2C2	AGO2	NP036286.2	859	97203.3	0.0628638	0.0256112	0.0454016	0.0477299	0.0454016	0.0616997	0.0372526	0.0558789	0.0616997	0.0710128	0.024447	0.0256112	0.0675204	0.0663562	0.0663562	0.0512224	0.0628638	0.0814901	0.00698487	0.032596	1.0045	1.023	0.9946	0.5409	6.1991	0.0349	1.9325	0.1653	0.9978	3.4682	0.2015	0.6698	639	0.367762	0.194053	0.203443	0.234742	0.571205	0.397496	0.103286	0.057903	0.0907668	0.0782473
NP036286_NM006793	27161	EIF2C2	AGO2	NP036286.2	859	97203.3	0.0628638	0.0256112	0.0454016	0.0477299	0.0454016	0.0616997	0.0372526	0.0558789	0.0616997	0.0710128	0.024447	0.0256112	0.0675204	0.0663562	0.0663562	0.0512224	0.0628638	0.0814901	0.00698487	0.032596	1.0045	1.023	0.9946	0.5409	6.1991	0.0349	1.9325	0.1653	0.9978	3.4682	0.2015	0.6698	771	0.249027	0.238651	0.241245	0.271077	0.490272	0.479896	0.0557717	0.0518807	0.07393	0.0518807
NP036286_NM002798	27161	EIF2C2	AGO2	NP036286.2	859	97203.3	0.0628638	0.0256112	0.0454016	0.0477299	0.0454016	0.0616997	0.0372526	0.0558789	0.0616997	0.0710128	0.024447	0.0256112	0.0675204	0.0663562	0.0663562	0.0512224	0.0628638	0.0814901	0.00698487	0.032596	1.0045	1.023	0.9946	0.5409	6.1991	0.0349	1.9325	0.1653	0.9978	3.4682	0.2015	0.6698	720	0.215278	0.272222	0.301389	0.211111	0.516667	0.573611	0.0291667	0.0611111	0.0736111	0.0472222
NP036286_NM178841	27161	EIF2C2	AGO2	NP036286.2	859	97203.3	0.0628638	0.0256112	0.0454016	0.0477299	0.0454016	0.0616997	0.0372526	0.0558789	0.0616997	0.0710128	0.024447	0.0256112	0.0675204	0.0663562	0.0663562	0.0512224	0.0628638	0.0814901	0.00698487	0.032596	1.0045	1.023	0.9946	0.5409	6.1991	0.0349	1.9325	0.1653	0.9978	3.4682	0.2015	0.6698	714	0.189076	0.358543	0.281513	0.170868	0.470588	0.640056	0.0322129	0.0588235	0.0672269	0.022409
NP036286_NM000967	27161	EIF2C2	AGO2	NP036286.2	859	97203.3	0.0628638	0.0256112	0.0454016	0.0477299	0.0454016	0.0616997	0.0372526	0.0558789	0.0616997	0.0710128	0.024447	0.0256112	0.0675204	0.0663562	0.0663562	0.0512224	0.0628638	0.0814901	0.00698487	0.032596	1.0045	1.023	0.9946	0.5409	6.1991	0.0349	1.9325	0.1653	0.9978	3.4682	0.2015	0.6698	1212	0.261551	0.252475	0.29538	0.190594	0.556931	0.547855	0.0627063	0.0544554	0.0891089	0.0453795
NP036286_NM021029	27161	EIF2C2	AGO2	NP036286.2	859	97203.3	0.0628638	0.0256112	0.0454016	0.0477299	0.0454016	0.0616997	0.0372526	0.0558789	0.0616997	0.0710128	0.024447	0.0256112	0.0675204	0.0663562	0.0663562	0.0512224	0.0628638	0.0814901	0.00698487	0.032596	1.0045	1.023	0.9946	0.5409	6.1991	0.0349	1.9325	0.1653	0.9978	3.4682	0.2015	0.6698	321	0.336449	0.193146	0.274143	0.196262	0.610592	0.46729	0.105919	0.046729	0.105919	0.0436137
NP036286_NM001000	27161	EIF2C2	AGO2	NP036286.2	859	97203.3	0.0628638	0.0256112	0.0454016	0.0477299	0.0454016	0.0616997	0.0372526	0.0558789	0.0616997	0.0710128	0.024447	0.0256112	0.0675204	0.0663562	0.0663562	0.0512224	0.0628638	0.0814901	0.00698487	0.032596	1.0045	1.023	0.9946	0.5409	6.1991	0.0349	1.9325	0.1653	0.9978	3.4682	0.2015	0.6698	156	0.378205	0.211538	0.205128	0.205128	0.583333	0.416667	0.128205	0.0512821	0.0769231	0.0705128
NP036286_NM000968	27161	EIF2C2	AGO2	NP036286.2	859	97203.3	0.0628638	0.0256112	0.0454016	0.0477299	0.0454016	0.0616997	0.0372526	0.0558789	0.0616997	0.0710128	0.024447	0.0256112	0.0675204	0.0663562	0.0663562	0.0512224	0.0628638	0.0814901	0.00698487	0.032596	1.0045	1.023	0.9946	0.5409	6.1991	0.0349	1.9325	0.1653	0.9978	3.4682	0.2015	0.6698	1284	0.297508	0.232087	0.255452	0.214953	0.55296	0.487539	0.0825545	0.0459502	0.088785	0.0514019
NP036286_NM021104	27161	EIF2C2	AGO2	NP036286.2	859	97203.3	0.0628638	0.0256112	0.0454016	0.0477299	0.0454016	0.0616997	0.0372526	0.0558789	0.0616997	0.0710128	0.024447	0.0256112	0.0675204	0.0663562	0.0663562	0.0512224	0.0628638	0.0814901	0.00698487	0.032596	1.0045	1.023	0.9946	0.5409	6.1991	0.0349	1.9325	0.1653	0.9978	3.4682	0.2015	0.6698	78	0.410256	0.141026	0.358974	0.0897436	0.769231	0.5	0.141026	0	0.192308	0.0384615
NP036286_NM000971	27161	EIF2C2	AGO2	NP036286.2	859	97203.3	0.0628638	0.0256112	0.0454016	0.0477299	0.0454016	0.0616997	0.0372526	0.0558789	0.0616997	0.0710128	0.024447	0.0256112	0.0675204	0.0663562	0.0663562	0.0512224	0.0628638	0.0814901	0.00698487	0.032596	1.0045	1.023	0.9946	0.5409	6.1991	0.0349	1.9325	0.1653	0.9978	3.4682	0.2015	0.6698	747	0.336011	0.180723	0.251673	0.231593	0.587684	0.432396	0.100402	0.0361446	0.0923695	0.0736278
NP036286_NM002954	27161	EIF2C2	AGO2	NP036286.2	859	97203.3	0.0628638	0.0256112	0.0454016	0.0477299	0.0454016	0.0616997	0.0372526	0.0558789	0.0616997	0.0710128	0.024447	0.0256112	0.0675204	0.0663562	0.0663562	0.0512224	0.0628638	0.0814901	0.00698487	0.032596	1.0045	1.023	0.9946	0.5409	6.1991	0.0349	1.9325	0.1653	0.9978	3.4682	0.2015	0.6698	471	0.314225	0.184713	0.250531	0.250531	0.564756	0.435244	0.0912951	0.0530786	0.0870488	0.059448
NP036286_NM001006	27161	EIF2C2	AGO2	NP036286.2	859	97203.3	0.0628638	0.0256112	0.0454016	0.0477299	0.0454016	0.0616997	0.0372526	0.0558789	0.0616997	0.0710128	0.024447	0.0256112	0.0675204	0.0663562	0.0663562	0.0512224	0.0628638	0.0814901	0.00698487	0.032596	1.0045	1.023	0.9946	0.5409	6.1991	0.0349	1.9325	0.1653	0.9978	3.4682	0.2015	0.6698	795	0.330818	0.179874	0.245283	0.244025	0.576101	0.425157	0.0981132	0.045283	0.0754717	0.072956
NP036286_NM001007	27161	EIF2C2	AGO2	NP036286.2	859	97203.3	0.0628638	0.0256112	0.0454016	0.0477299	0.0454016	0.0616997	0.0372526	0.0558789	0.0616997	0.0710128	0.024447	0.0256112	0.0675204	0.0663562	0.0663562	0.0512224	0.0628638	0.0814901	0.00698487	0.032596	1.0045	1.023	0.9946	0.5409	6.1991	0.0349	1.9325	0.1653	0.9978	3.4682	0.2015	0.6698	792	0.27399	0.232323	0.252525	0.241162	0.526515	0.484848	0.0593434	0.0555556	0.0719697	0.0707071
NP036286_NM003011	27161	EIF2C2	AGO2	NP036286.2	859	97203.3	0.0628638	0.0256112	0.0454016	0.0477299	0.0454016	0.0616997	0.0372526	0.0558789	0.0616997	0.0710128	0.024447	0.0256112	0.0675204	0.0663562	0.0663562	0.0512224	0.0628638	0.0814901	0.00698487	0.032596	1.0045	1.023	0.9946	0.5409	6.1991	0.0349	1.9325	0.1653	0.9978	3.4682	0.2015	0.6698	834	0.369305	0.153477	0.26259	0.214628	0.631894	0.416067	0.0959233	0.0491607	0.109113	0.0827338
NP036286_NM005563	27161	EIF2C2	AGO2	NP036286.2	859	97203.3	0.0628638	0.0256112	0.0454016	0.0477299	0.0454016	0.0616997	0.0372526	0.0558789	0.0616997	0.0710128	0.024447	0.0256112	0.0675204	0.0663562	0.0663562	0.0512224	0.0628638	0.0814901	0.00698487	0.032596	1.0045	1.023	0.9946	0.5409	6.1991	0.0349	1.9325	0.1653	0.9978	3.4682	0.2015	0.6698	450	0.364444	0.206667	0.255556	0.173333	0.62	0.462222	0.115556	0.0444444	0.126667	0.04
NP036286_NM014765	27161	EIF2C2	AGO2	NP036286.2	859	97203.3	0.0628638	0.0256112	0.0454016	0.0477299	0.0454016	0.0616997	0.0372526	0.0558789	0.0616997	0.0710128	0.024447	0.0256112	0.0675204	0.0663562	0.0663562	0.0512224	0.0628638	0.0814901	0.00698487	0.032596	1.0045	1.023	0.9946	0.5409	6.1991	0.0349	1.9325	0.1653	0.9978	3.4682	0.2015	0.6698	438	0.289954	0.221461	0.260274	0.228311	0.550228	0.481735	0.0753425	0.0570776	0.0981735	0.0410959
NP036286_NM000365	27161	EIF2C2	AGO2	NP036286.2	859	97203.3	0.0628638	0.0256112	0.0454016	0.0477299	0.0454016	0.0616997	0.0372526	0.0558789	0.0616997	0.0710128	0.024447	0.0256112	0.0675204	0.0663562	0.0663562	0.0512224	0.0628638	0.0814901	0.00698487	0.032596	1.0045	1.023	0.9946	0.5409	6.1991	0.0349	1.9325	0.1653	0.9978	3.4682	0.2015	0.6698	750	0.234667	0.24	0.325333	0.2	0.56	0.565333	0.0506667	0.044	0.0826667	0.0466667
NP036286_NM003295	27161	EIF2C2	AGO2	NP036286.2	859	97203.3	0.0628638	0.0256112	0.0454016	0.0477299	0.0454016	0.0616997	0.0372526	0.0558789	0.0616997	0.0710128	0.024447	0.0256112	0.0675204	0.0663562	0.0663562	0.0512224	0.0628638	0.0814901	0.00698487	0.032596	1.0045	1.023	0.9946	0.5409	6.1991	0.0349	1.9325	0.1653	0.9978	3.4682	0.2015	0.6698	519	0.32948	0.192678	0.248555	0.229287	0.578035	0.441233	0.0789981	0.061657	0.0732177	0.0809249
NP036286_NM178014	27161	EIF2C2	AGO2	NP036286.2	859	97203.3	0.0628638	0.0256112	0.0454016	0.0477299	0.0454016	0.0616997	0.0372526	0.0558789	0.0616997	0.0710128	0.024447	0.0256112	0.0675204	0.0663562	0.0663562	0.0512224	0.0628638	0.0814901	0.00698487	0.032596	1.0045	1.023	0.9946	0.5409	6.1991	0.0349	1.9325	0.1653	0.9978	3.4682	0.2015	0.6698	1335	0.229963	0.290637	0.268165	0.211236	0.498127	0.558801	0.0374532	0.0651685	0.0734082	0.0501873
NP036286_NM003375	27161	EIF2C2	AGO2	NP036286.2	859	97203.3	0.0628638	0.0256112	0.0454016	0.0477299	0.0454016	0.0616997	0.0372526	0.0558789	0.0616997	0.0710128	0.024447	0.0256112	0.0675204	0.0663562	0.0663562	0.0512224	0.0628638	0.0814901	0.00698487	0.032596	1.0045	1.023	0.9946	0.5409	6.1991	0.0349	1.9325	0.1653	0.9978	3.4682	0.2015	0.6698	885	0.281356	0.19887	0.247458	0.272316	0.528814	0.446328	0.0655367	0.0700565	0.0644068	0.0564972
NP001410_NM012089	1994	ELAVL1	HUR	NP001410.2	326	36090	0.0705521	0.00920245	0.0490798	0.0460123	0.0552147	0.0889571	0.0245399	0.0582822	0.0552147	0.0674847	0.0306748	0.0705521	0.0368098	0.0368098	0.0613497	0.0858896	0.0490798	0.0674847	0.00613497	0.0306748	0.9918	1.0029	1.0302	0.5397	6.1013	0.0214	1.8438	0.1411	1.0014	3.2904	0.1668	0.6641	2217	0.201173	0.26793	0.294993	0.235904	0.496166	0.562923	0.0437528	0.0356337	0.059991	0.0464592
NP001410_NM207629	1994	ELAVL1	HUR	NP001410.2	326	36090	0.0705521	0.00920245	0.0490798	0.0460123	0.0552147	0.0889571	0.0245399	0.0582822	0.0552147	0.0674847	0.0306748	0.0705521	0.0368098	0.0368098	0.0613497	0.0858896	0.0490798	0.0674847	0.00613497	0.0306748	0.9918	1.0029	1.0302	0.5397	6.1013	0.0214	1.8438	0.1411	1.0014	3.2904	0.1668	0.6641	1992	0.204317	0.286145	0.283635	0.225904	0.487952	0.569779	0.0356426	0.0532129	0.062751	0.0471888
NP001410_NM018394	1994	ELAVL1	HUR	NP001410.2	326	36090	0.0705521	0.00920245	0.0490798	0.0460123	0.0552147	0.0889571	0.0245399	0.0582822	0.0552147	0.0674847	0.0306748	0.0705521	0.0368098	0.0368098	0.0613497	0.0858896	0.0490798	0.0674847	0.00613497	0.0306748	0.9918	1.0029	1.0302	0.5397	6.1013	0.0214	1.8438	0.1411	1.0014	3.2904	0.1668	0.6641	921	0.270358	0.217155	0.248643	0.263844	0.519001	0.465798	0.0597177	0.0499457	0.0749186	0.0662324
NP001410_NM032859	1994	ELAVL1	HUR	NP001410.2	326	36090	0.0705521	0.00920245	0.0490798	0.0460123	0.0552147	0.0889571	0.0245399	0.0582822	0.0552147	0.0674847	0.0306748	0.0705521	0.0368098	0.0368098	0.0613497	0.0858896	0.0490798	0.0674847	0.00613497	0.0306748	0.9918	1.0029	1.0302	0.5397	6.1013	0.0214	1.8438	0.1411	1.0014	3.2904	0.1668	0.6641	1014	0.291913	0.20217	0.179487	0.32643	0.4714	0.381657	0.0670611	0.0542406	0.0522682	0.0936884
NP001410_NM022735	1994	ELAVL1	HUR	NP001410.2	326	36090	0.0705521	0.00920245	0.0490798	0.0460123	0.0552147	0.0889571	0.0245399	0.0582822	0.0552147	0.0674847	0.0306748	0.0705521	0.0368098	0.0368098	0.0613497	0.0858896	0.0490798	0.0674847	0.00613497	0.0306748	0.9918	1.0029	1.0302	0.5397	6.1013	0.0214	1.8438	0.1411	1.0014	3.2904	0.1668	0.6641	1587	0.294896	0.221172	0.295526	0.188406	0.590422	0.516698	0.0693132	0.0478891	0.1046	0.0491493
NP001410_NM001039844	1994	ELAVL1	HUR	NP001410.2	326	36090	0.0705521	0.00920245	0.0490798	0.0460123	0.0552147	0.0889571	0.0245399	0.0582822	0.0552147	0.0674847	0.0306748	0.0705521	0.0368098	0.0368098	0.0613497	0.0858896	0.0490798	0.0674847	0.00613497	0.0306748	0.9918	1.0029	1.0302	0.5397	6.1013	0.0214	1.8438	0.1411	1.0014	3.2904	0.1668	0.6641	267	0.363296	0.153558	0.277154	0.205993	0.640449	0.430712	0.101124	0.0411985	0.101124	0.0749064
NP001410_NM001101	1994	ELAVL1	HUR	NP001410.2	326	36090	0.0705521	0.00920245	0.0490798	0.0460123	0.0552147	0.0889571	0.0245399	0.0582822	0.0552147	0.0674847	0.0306748	0.0705521	0.0368098	0.0368098	0.0613497	0.0858896	0.0490798	0.0674847	0.00613497	0.0306748	0.9918	1.0029	1.0302	0.5397	6.1013	0.0214	1.8438	0.1411	1.0014	3.2904	0.1668	0.6641	1128	0.208333	0.330674	0.274823	0.18617	0.483156	0.605496	0.0292553	0.0647163	0.0585106	0.0514184
NP001410_NM005722	1994	ELAVL1	HUR	NP001410.2	326	36090	0.0705521	0.00920245	0.0490798	0.0460123	0.0552147	0.0889571	0.0245399	0.0582822	0.0552147	0.0674847	0.0306748	0.0705521	0.0368098	0.0368098	0.0613497	0.0858896	0.0490798	0.0674847	0.00613497	0.0306748	0.9918	1.0029	1.0302	0.5397	6.1013	0.0214	1.8438	0.1411	1.0014	3.2904	0.1668	0.6641	1185	0.303797	0.187342	0.238819	0.270042	0.542616	0.42616	0.0649789	0.0691983	0.0725738	0.07173
NP001410_NM001110	1994	ELAVL1	HUR	NP001410.2	326	36090	0.0705521	0.00920245	0.0490798	0.0460123	0.0552147	0.0889571	0.0245399	0.0582822	0.0552147	0.0674847	0.0306748	0.0705521	0.0368098	0.0368098	0.0613497	0.0858896	0.0490798	0.0674847	0.00613497	0.0306748	0.9918	1.0029	1.0302	0.5397	6.1013	0.0214	1.8438	0.1411	1.0014	3.2904	0.1668	0.6641	2247	0.313752	0.190031	0.226079	0.270138	0.539831	0.41611	0.0743213	0.0547397	0.0743213	0.0850022
NP001410_NM014243	1994	ELAVL1	HUR	NP001410.2	326	36090	0.0705521	0.00920245	0.0490798	0.0460123	0.0552147	0.0889571	0.0245399	0.0582822	0.0552147	0.0674847	0.0306748	0.0705521	0.0368098	0.0368098	0.0613497	0.0858896	0.0490798	0.0674847	0.00613497	0.0306748	0.9918	1.0029	1.0302	0.5397	6.1013	0.0214	1.8438	0.1411	1.0014	3.2904	0.1668	0.6641	3618	0.285793	0.221669	0.243505	0.249033	0.529298	0.465174	0.0644002	0.0580431	0.0726921	0.0704809
NP001410_NM015841	1994	ELAVL1	HUR	NP001410.2	326	36090	0.0705521	0.00920245	0.0490798	0.0460123	0.0552147	0.0889571	0.0245399	0.0582822	0.0552147	0.0674847	0.0306748	0.0705521	0.0368098	0.0368098	0.0613497	0.0858896	0.0490798	0.0674847	0.00613497	0.0306748	0.9918	1.0029	1.0302	0.5397	6.1013	0.0214	1.8438	0.1411	1.0014	3.2904	0.1668	0.6641	3546	0.282572	0.260293	0.251551	0.205584	0.534123	0.511844	0.0645798	0.0564016	0.0908065	0.0510434
NP001410_NM001619	1994	ELAVL1	HUR	NP001410.2	326	36090	0.0705521	0.00920245	0.0490798	0.0460123	0.0552147	0.0889571	0.0245399	0.0582822	0.0552147	0.0674847	0.0306748	0.0705521	0.0368098	0.0368098	0.0613497	0.0858896	0.0490798	0.0674847	0.00613497	0.0306748	0.9918	1.0029	1.0302	0.5397	6.1013	0.0214	1.8438	0.1411	1.0014	3.2904	0.1668	0.6641	2070	0.219807	0.290338	0.313527	0.176329	0.533333	0.603865	0.0386473	0.0531401	0.084058	0.0391304
NP001410_NM005160	1994	ELAVL1	HUR	NP001410.2	326	36090	0.0705521	0.00920245	0.0490798	0.0460123	0.0552147	0.0889571	0.0245399	0.0582822	0.0552147	0.0674847	0.0306748	0.0705521	0.0368098	0.0368098	0.0613497	0.0858896	0.0490798	0.0674847	0.00613497	0.0306748	0.9918	1.0029	1.0302	0.5397	6.1013	0.0214	1.8438	0.1411	1.0014	3.2904	0.1668	0.6641	2067	0.305757	0.207063	0.240445	0.246734	0.546202	0.447508	0.0759555	0.0556362	0.079342	0.0643445
NP001410_NM001114176	1994	ELAVL1	HUR	NP001410.2	326	36090	0.0705521	0.00920245	0.0490798	0.0460123	0.0552147	0.0889571	0.0245399	0.0582822	0.0552147	0.0674847	0.0306748	0.0705521	0.0368098	0.0368098	0.0613497	0.0858896	0.0490798	0.0674847	0.00613497	0.0306748	0.9918	1.0029	1.0302	0.5397	6.1013	0.0214	1.8438	0.1411	1.0014	3.2904	0.1668	0.6641	1554	0.266409	0.229086	0.330116	0.174389	0.596525	0.559202	0.0514801	0.0469755	0.104891	0.0444015
NP001410_NM198970	1994	ELAVL1	HUR	NP001410.2	326	36090	0.0705521	0.00920245	0.0490798	0.0460123	0.0552147	0.0889571	0.0245399	0.0582822	0.0552147	0.0674847	0.0306748	0.0705521	0.0368098	0.0368098	0.0613497	0.0858896	0.0490798	0.0674847	0.00613497	0.0306748	0.9918	1.0029	1.0302	0.5397	6.1013	0.0214	1.8438	0.1411	1.0014	3.2904	0.1668	0.6641	591	0.235195	0.328257	0.260575	0.175973	0.49577	0.588832	0.0406091	0.0642978	0.0846024	0.037225
NP001410_NM001166693	1994	ELAVL1	HUR	NP001410.2	326	36090	0.0705521	0.00920245	0.0490798	0.0460123	0.0552147	0.0889571	0.0245399	0.0582822	0.0552147	0.0674847	0.0306748	0.0705521	0.0368098	0.0368098	0.0613497	0.0858896	0.0490798	0.0674847	0.00613497	0.0306748	0.9918	1.0029	1.0302	0.5397	6.1013	0.0214	1.8438	0.1411	1.0014	3.2904	0.1668	0.6641	3657	0.293957	0.295324	0.227782	0.182937	0.521739	0.523106	0.0691824	0.0596117	0.103363	0.0360952
NP001410_NM018361	1994	ELAVL1	HUR	NP001410.2	326	36090	0.0705521	0.00920245	0.0490798	0.0460123	0.0552147	0.0889571	0.0245399	0.0582822	0.0552147	0.0674847	0.0306748	0.0705521	0.0368098	0.0368098	0.0613497	0.0858896	0.0490798	0.0674847	0.00613497	0.0306748	0.9918	1.0029	1.0302	0.5397	6.1013	0.0214	1.8438	0.1411	1.0014	3.2904	0.1668	0.6641	1095	0.294977	0.209132	0.241096	0.254795	0.536073	0.450228	0.0730594	0.0493151	0.0666667	0.0785388
NP001410_NM006621	1994	ELAVL1	HUR	NP001410.2	326	36090	0.0705521	0.00920245	0.0490798	0.0460123	0.0552147	0.0889571	0.0245399	0.0582822	0.0552147	0.0674847	0.0306748	0.0705521	0.0368098	0.0368098	0.0613497	0.0858896	0.0490798	0.0674847	0.00613497	0.0306748	0.9918	1.0029	1.0302	0.5397	6.1013	0.0214	1.8438	0.1411	1.0014	3.2904	0.1668	0.6641	1593	0.263653	0.234149	0.27307	0.229127	0.536723	0.507219	0.0552417	0.0571249	0.0759573	0.0596359
NP001410_NM017758	1994	ELAVL1	HUR	NP001410.2	326	36090	0.0705521	0.00920245	0.0490798	0.0460123	0.0552147	0.0889571	0.0245399	0.0582822	0.0552147	0.0674847	0.0306748	0.0705521	0.0368098	0.0368098	0.0613497	0.0858896	0.0490798	0.0674847	0.00613497	0.0306748	0.9918	1.0029	1.0302	0.5397	6.1013	0.0214	1.8438	0.1411	1.0014	3.2904	0.1668	0.6641	1185	0.213502	0.321519	0.311392	0.153586	0.524895	0.632911	0.0362869	0.0556962	0.0852321	0.0295359
NP001410_NM001144	1994	ELAVL1	HUR	NP001410.2	326	36090	0.0705521	0.00920245	0.0490798	0.0460123	0.0552147	0.0889571	0.0245399	0.0582822	0.0552147	0.0674847	0.0306748	0.0705521	0.0368098	0.0368098	0.0613497	0.0858896	0.0490798	0.0674847	0.00613497	0.0306748	0.9918	1.0029	1.0302	0.5397	6.1013	0.0214	1.8438	0.1411	1.0014	3.2904	0.1668	0.6641	1932	0.214286	0.280538	0.266046	0.23913	0.480331	0.546584	0.0393375	0.0564182	0.0678054	0.0445135
NP001410_NM144567	1994	ELAVL1	HUR	NP001410.2	326	36090	0.0705521	0.00920245	0.0490798	0.0460123	0.0552147	0.0889571	0.0245399	0.0582822	0.0552147	0.0674847	0.0306748	0.0705521	0.0368098	0.0368098	0.0613497	0.0858896	0.0490798	0.0674847	0.00613497	0.0306748	0.9918	1.0029	1.0302	0.5397	6.1013	0.0214	1.8438	0.1411	1.0014	3.2904	0.1668	0.6641	1635	0.293578	0.204281	0.223242	0.278899	0.51682	0.427523	0.0642202	0.0617737	0.0752294	0.0691131
NP001410_NM006305	1994	ELAVL1	HUR	NP001410.2	326	36090	0.0705521	0.00920245	0.0490798	0.0460123	0.0552147	0.0889571	0.0245399	0.0582822	0.0552147	0.0674847	0.0306748	0.0705521	0.0368098	0.0368098	0.0613497	0.0858896	0.0490798	0.0674847	0.00613497	0.0306748	0.9918	1.0029	1.0302	0.5397	6.1013	0.0214	1.8438	0.1411	1.0014	3.2904	0.1668	0.6641	750	0.346667	0.173333	0.305333	0.174667	0.652	0.478667	0.0933333	0.0626667	0.116	0.052
NP001410_NM001136479	1994	ELAVL1	HUR	NP001410.2	326	36090	0.0705521	0.00920245	0.0490798	0.0460123	0.0552147	0.0889571	0.0245399	0.0582822	0.0552147	0.0674847	0.0306748	0.0705521	0.0368098	0.0368098	0.0613497	0.0858896	0.0490798	0.0674847	0.00613497	0.0306748	0.9918	1.0029	1.0302	0.5397	6.1013	0.0214	1.8438	0.1411	1.0014	3.2904	0.1668	0.6641	663	0.371041	0.119155	0.307692	0.202112	0.678733	0.426848	0.102564	0.0316742	0.131222	0.0769231
NP001410_NM001284	1994	ELAVL1	HUR	NP001410.2	326	36090	0.0705521	0.00920245	0.0490798	0.0460123	0.0552147	0.0889571	0.0245399	0.0582822	0.0552147	0.0674847	0.0306748	0.0705521	0.0368098	0.0368098	0.0613497	0.0858896	0.0490798	0.0674847	0.00613497	0.0306748	0.9918	1.0029	1.0302	0.5397	6.1013	0.0214	1.8438	0.1411	1.0014	3.2904	0.1668	0.6641	582	0.329897	0.168385	0.213058	0.28866	0.542955	0.381443	0.0841924	0.0446735	0.0687285	0.0996564
NP001410_NM001166054	1994	ELAVL1	HUR	NP001410.2	326	36090	0.0705521	0.00920245	0.0490798	0.0460123	0.0552147	0.0889571	0.0245399	0.0582822	0.0552147	0.0674847	0.0306748	0.0705521	0.0368098	0.0368098	0.0613497	0.0858896	0.0490798	0.0674847	0.00613497	0.0306748	0.9918	1.0029	1.0302	0.5397	6.1013	0.0214	1.8438	0.1411	1.0014	3.2904	0.1668	0.6641	633	0.270142	0.241706	0.259084	0.229068	0.529226	0.50079	0.0647709	0.0631912	0.0726698	0.0521327
NP001410_NM015957	1994	ELAVL1	HUR	NP001410.2	326	36090	0.0705521	0.00920245	0.0490798	0.0460123	0.0552147	0.0889571	0.0245399	0.0582822	0.0552147	0.0674847	0.0306748	0.0705521	0.0368098	0.0368098	0.0613497	0.0858896	0.0490798	0.0674847	0.00613497	0.0306748	0.9918	1.0029	1.0302	0.5397	6.1013	0.0214	1.8438	0.1411	1.0014	3.2904	0.1668	0.6641	729	0.314129	0.178326	0.256516	0.251029	0.570645	0.434842	0.0699588	0.0507545	0.0809328	0.085048
NP001410_NM001142281	1994	ELAVL1	HUR	NP001410.2	326	36090	0.0705521	0.00920245	0.0490798	0.0460123	0.0552147	0.0889571	0.0245399	0.0582822	0.0552147	0.0674847	0.0306748	0.0705521	0.0368098	0.0368098	0.0613497	0.0858896	0.0490798	0.0674847	0.00613497	0.0306748	0.9918	1.0029	1.0302	0.5397	6.1013	0.0214	1.8438	0.1411	1.0014	3.2904	0.1668	0.6641	1272	0.318396	0.198113	0.248428	0.235063	0.566824	0.446541	0.0754717	0.0511006	0.0880503	0.0754717
NP001410_NM001660	1994	ELAVL1	HUR	NP001410.2	326	36090	0.0705521	0.00920245	0.0490798	0.0460123	0.0552147	0.0889571	0.0245399	0.0582822	0.0552147	0.0674847	0.0306748	0.0705521	0.0368098	0.0368098	0.0613497	0.0858896	0.0490798	0.0674847	0.00613497	0.0306748	0.9918	1.0029	1.0302	0.5397	6.1013	0.0214	1.8438	0.1411	1.0014	3.2904	0.1668	0.6641	543	0.296501	0.186004	0.237569	0.279926	0.53407	0.423573	0.0699816	0.0515654	0.0755064	0.0773481
NP001410_NM001663	1994	ELAVL1	HUR	NP001410.2	326	36090	0.0705521	0.00920245	0.0490798	0.0460123	0.0552147	0.0889571	0.0245399	0.0582822	0.0552147	0.0674847	0.0306748	0.0705521	0.0368098	0.0368098	0.0613497	0.0858896	0.0490798	0.0674847	0.00613497	0.0306748	0.9918	1.0029	1.0302	0.5397	6.1013	0.0214	1.8438	0.1411	1.0014	3.2904	0.1668	0.6641	528	0.251894	0.274621	0.284091	0.189394	0.535985	0.558712	0.0549242	0.0738636	0.0492424	0.0587121
NP001410_NM032900	1994	ELAVL1	HUR	NP001410.2	326	36090	0.0705521	0.00920245	0.0490798	0.0460123	0.0552147	0.0889571	0.0245399	0.0582822	0.0552147	0.0674847	0.0306748	0.0705521	0.0368098	0.0368098	0.0613497	0.0858896	0.0490798	0.0674847	0.00613497	0.0306748	0.9918	1.0029	1.0302	0.5397	6.1013	0.0214	1.8438	0.1411	1.0014	3.2904	0.1668	0.6641	1485	0.295623	0.220202	0.239057	0.245118	0.53468	0.459259	0.0686869	0.0552189	0.0814815	0.0646465
NP001410_NM139135	1994	ELAVL1	HUR	NP001410.2	326	36090	0.0705521	0.00920245	0.0490798	0.0460123	0.0552147	0.0889571	0.0245399	0.0582822	0.0552147	0.0674847	0.0306748	0.0705521	0.0368098	0.0368098	0.0613497	0.0858896	0.0490798	0.0674847	0.00613497	0.0306748	0.9918	1.0029	1.0302	0.5397	6.1013	0.0214	1.8438	0.1411	1.0014	3.2904	0.1668	0.6641	6207	0.231352	0.320928	0.277106	0.170614	0.508458	0.598034	0.0407604	0.0552602	0.0828097	0.0451104
NP001410_NM006321	1994	ELAVL1	HUR	NP001410.2	326	36090	0.0705521	0.00920245	0.0490798	0.0460123	0.0552147	0.0889571	0.0245399	0.0582822	0.0552147	0.0674847	0.0306748	0.0705521	0.0368098	0.0368098	0.0613497	0.0858896	0.0490798	0.0674847	0.00613497	0.0306748	0.9918	1.0029	1.0302	0.5397	6.1013	0.0214	1.8438	0.1411	1.0014	3.2904	0.1668	0.6641	1482	0.282726	0.237517	0.261808	0.217949	0.544534	0.499325	0.0539811	0.0647773	0.0951417	0.0566802
NP001410_NM177985	1994	ELAVL1	HUR	NP001410.2	326	36090	0.0705521	0.00920245	0.0490798	0.0460123	0.0552147	0.0889571	0.0245399	0.0582822	0.0552147	0.0674847	0.0306748	0.0705521	0.0368098	0.0368098	0.0613497	0.0858896	0.0490798	0.0674847	0.00613497	0.0306748	0.9918	1.0029	1.0302	0.5397	6.1013	0.0214	1.8438	0.1411	1.0014	3.2904	0.1668	0.6641	429	0.331002	0.156177	0.226107	0.286713	0.55711	0.382284	0.0815851	0.0582751	0.0862471	0.0885781
NP001410_NM178815	1994	ELAVL1	HUR	NP001410.2	326	36090	0.0705521	0.00920245	0.0490798	0.0460123	0.0552147	0.0889571	0.0245399	0.0582822	0.0552147	0.0674847	0.0306748	0.0705521	0.0368098	0.0368098	0.0613497	0.0858896	0.0490798	0.0674847	0.00613497	0.0306748	0.9918	1.0029	1.0302	0.5397	6.1013	0.0214	1.8438	0.1411	1.0014	3.2904	0.1668	0.6641	540	0.311111	0.187037	0.225926	0.275926	0.537037	0.412963	0.0740741	0.0537037	0.0685185	0.0925926
NP001410_NM015161	1994	ELAVL1	HUR	NP001410.2	326	36090	0.0705521	0.00920245	0.0490798	0.0460123	0.0552147	0.0889571	0.0245399	0.0582822	0.0552147	0.0674847	0.0306748	0.0705521	0.0368098	0.0368098	0.0613497	0.0858896	0.0490798	0.0674847	0.00613497	0.0306748	0.9918	1.0029	1.0302	0.5397	6.1013	0.0214	1.8438	0.1411	1.0014	3.2904	0.1668	0.6641	612	0.281046	0.215686	0.23366	0.269608	0.514706	0.449346	0.0718954	0.0588235	0.0555556	0.0604575
NP001410_NM001024960	1994	ELAVL1	HUR	NP001410.2	326	36090	0.0705521	0.00920245	0.0490798	0.0460123	0.0552147	0.0889571	0.0245399	0.0582822	0.0552147	0.0674847	0.0306748	0.0705521	0.0368098	0.0368098	0.0613497	0.0858896	0.0490798	0.0674847	0.00613497	0.0306748	0.9918	1.0029	1.0302	0.5397	6.1013	0.0214	1.8438	0.1411	1.0014	3.2904	0.1668	0.6641	237	0.278481	0.198312	0.257384	0.265823	0.535865	0.455696	0.0548523	0.0464135	0.092827	0.0759494
NP001410_NM005717	1994	ELAVL1	HUR	NP001410.2	326	36090	0.0705521	0.00920245	0.0490798	0.0460123	0.0552147	0.0889571	0.0245399	0.0582822	0.0552147	0.0674847	0.0306748	0.0705521	0.0368098	0.0368098	0.0613497	0.0858896	0.0490798	0.0674847	0.00613497	0.0306748	0.9918	1.0029	1.0302	0.5397	6.1013	0.0214	1.8438	0.1411	1.0014	3.2904	0.1668	0.6641	456	0.278509	0.210526	0.300439	0.210526	0.578947	0.510965	0.0723684	0.0482456	0.0877193	0.0548246
NP001410_NM020801	1994	ELAVL1	HUR	NP001410.2	326	36090	0.0705521	0.00920245	0.0490798	0.0460123	0.0552147	0.0889571	0.0245399	0.0582822	0.0552147	0.0674847	0.0306748	0.0705521	0.0368098	0.0368098	0.0613497	0.0858896	0.0490798	0.0674847	0.00613497	0.0306748	0.9918	1.0029	1.0302	0.5397	6.1013	0.0214	1.8438	0.1411	1.0014	3.2904	0.1668	0.6641	1245	0.302811	0.217671	0.220884	0.258635	0.523695	0.438554	0.0722892	0.0538153	0.0779116	0.0771084
NP001410_NM001164603	1994	ELAVL1	HUR	NP001410.2	326	36090	0.0705521	0.00920245	0.0490798	0.0460123	0.0552147	0.0889571	0.0245399	0.0582822	0.0552147	0.0674847	0.0306748	0.0705521	0.0368098	0.0368098	0.0613497	0.0858896	0.0490798	0.0674847	0.00613497	0.0306748	0.9918	1.0029	1.0302	0.5397	6.1013	0.0214	1.8438	0.1411	1.0014	3.2904	0.1668	0.6641	258	0.306202	0.224806	0.275194	0.193798	0.581395	0.5	0.0775194	0.0503876	0.0968992	0.0542636
NP001410_NM032810	1994	ELAVL1	HUR	NP001410.2	326	36090	0.0705521	0.00920245	0.0490798	0.0460123	0.0552147	0.0889571	0.0245399	0.0582822	0.0552147	0.0674847	0.0306748	0.0705521	0.0368098	0.0368098	0.0613497	0.0858896	0.0490798	0.0674847	0.00613497	0.0306748	0.9918	1.0029	1.0302	0.5397	6.1013	0.0214	1.8438	0.1411	1.0014	3.2904	0.1668	0.6641	1086	0.315838	0.192449	0.219153	0.27256	0.534991	0.411602	0.0773481	0.0423573	0.0791897	0.0837937
NP001410_NM001880	1994	ELAVL1	HUR	NP001410.2	326	36090	0.0705521	0.00920245	0.0490798	0.0460123	0.0552147	0.0889571	0.0245399	0.0582822	0.0552147	0.0674847	0.0306748	0.0705521	0.0368098	0.0368098	0.0613497	0.0858896	0.0490798	0.0674847	0.00613497	0.0306748	0.9918	1.0029	1.0302	0.5397	6.1013	0.0214	1.8438	0.1411	1.0014	3.2904	0.1668	0.6641	1518	0.303689	0.248353	0.208169	0.239789	0.511858	0.456522	0.0665349	0.0606061	0.0922266	0.0606061
NP001410_NM024524	1994	ELAVL1	HUR	NP001410.2	326	36090	0.0705521	0.00920245	0.0490798	0.0460123	0.0552147	0.0889571	0.0245399	0.0582822	0.0552147	0.0674847	0.0306748	0.0705521	0.0368098	0.0368098	0.0613497	0.0858896	0.0490798	0.0674847	0.00613497	0.0306748	0.9918	1.0029	1.0302	0.5397	6.1013	0.0214	1.8438	0.1411	1.0014	3.2904	0.1668	0.6641	3681	0.287694	0.187177	0.215974	0.309155	0.503667	0.403151	0.0679163	0.0480848	0.062483	0.0825863
NP001410_NM001681	1994	ELAVL1	HUR	NP001410.2	326	36090	0.0705521	0.00920245	0.0490798	0.0460123	0.0552147	0.0889571	0.0245399	0.0582822	0.0552147	0.0674847	0.0306748	0.0705521	0.0368098	0.0368098	0.0613497	0.0858896	0.0490798	0.0674847	0.00613497	0.0306748	0.9918	1.0029	1.0302	0.5397	6.1013	0.0214	1.8438	0.1411	1.0014	3.2904	0.1668	0.6641	2994	0.261523	0.231129	0.253173	0.254175	0.514696	0.484302	0.0621242	0.0567802	0.0637943	0.0594522
NP001410_NM000052	1994	ELAVL1	HUR	NP001410.2	326	36090	0.0705521	0.00920245	0.0490798	0.0460123	0.0552147	0.0889571	0.0245399	0.0582822	0.0552147	0.0674847	0.0306748	0.0705521	0.0368098	0.0368098	0.0613497	0.0858896	0.0490798	0.0674847	0.00613497	0.0306748	0.9918	1.0029	1.0302	0.5397	6.1013	0.0214	1.8438	0.1411	1.0014	3.2904	0.1668	0.6641	4503	0.300244	0.194093	0.225405	0.280258	0.52565	0.419498	0.0703975	0.0535199	0.0735066	0.0799467
NP001410_NM148174	1994	ELAVL1	HUR	NP001410.2	326	36090	0.0705521	0.00920245	0.0490798	0.0460123	0.0552147	0.0889571	0.0245399	0.0582822	0.0552147	0.0674847	0.0306748	0.0705521	0.0368098	0.0368098	0.0613497	0.0858896	0.0490798	0.0674847	0.00613497	0.0306748	0.9918	1.0029	1.0302	0.5397	6.1013	0.0214	1.8438	0.1411	1.0014	3.2904	0.1668	0.6641	1347	0.302895	0.166295	0.228656	0.302153	0.531552	0.394952	0.077951	0.0423163	0.0675575	0.0898292
NP001410_NM006577	1994	ELAVL1	HUR	NP001410.2	326	36090	0.0705521	0.00920245	0.0490798	0.0460123	0.0552147	0.0889571	0.0245399	0.0582822	0.0552147	0.0674847	0.0306748	0.0705521	0.0368098	0.0368098	0.0613497	0.0858896	0.0490798	0.0674847	0.00613497	0.0306748	0.9918	1.0029	1.0302	0.5397	6.1013	0.0214	1.8438	0.1411	1.0014	3.2904	0.1668	0.6641	1194	0.29062	0.229481	0.234506	0.245394	0.525126	0.463987	0.0686767	0.061139	0.0753769	0.0636516
NP001410_NM003779	1994	ELAVL1	HUR	NP001410.2	326	36090	0.0705521	0.00920245	0.0490798	0.0460123	0.0552147	0.0889571	0.0245399	0.0582822	0.0552147	0.0674847	0.0306748	0.0705521	0.0368098	0.0368098	0.0613497	0.0858896	0.0490798	0.0674847	0.00613497	0.0306748	0.9918	1.0029	1.0302	0.5397	6.1013	0.0214	1.8438	0.1411	1.0014	3.2904	0.1668	0.6641	1182	0.200508	0.305415	0.273266	0.220812	0.473773	0.57868	0.0321489	0.0617597	0.0575296	0.0448393
NP001410_NM004776	1994	ELAVL1	HUR	NP001410.2	326	36090	0.0705521	0.00920245	0.0490798	0.0460123	0.0552147	0.0889571	0.0245399	0.0582822	0.0552147	0.0674847	0.0306748	0.0705521	0.0368098	0.0368098	0.0613497	0.0858896	0.0490798	0.0674847	0.00613497	0.0306748	0.9918	1.0029	1.0302	0.5397	6.1013	0.0214	1.8438	0.1411	1.0014	3.2904	0.1668	0.6641	1167	0.253642	0.255356	0.239075	0.251928	0.492716	0.49443	0.059126	0.0616967	0.0582691	0.059126
NP001410_NM004775	1994	ELAVL1	HUR	NP001410.2	326	36090	0.0705521	0.00920245	0.0490798	0.0460123	0.0552147	0.0889571	0.0245399	0.0582822	0.0552147	0.0674847	0.0306748	0.0705521	0.0368098	0.0368098	0.0613497	0.0858896	0.0490798	0.0674847	0.00613497	0.0306748	0.9918	1.0029	1.0302	0.5397	6.1013	0.0214	1.8438	0.1411	1.0014	3.2904	0.1668	0.6641	1149	0.29678	0.208877	0.210618	0.283725	0.507398	0.419495	0.0731071	0.051349	0.0591819	0.0905135
NP001410_NM000465	1994	ELAVL1	HUR	NP001410.2	326	36090	0.0705521	0.00920245	0.0490798	0.0460123	0.0552147	0.0889571	0.0245399	0.0582822	0.0552147	0.0674847	0.0306748	0.0705521	0.0368098	0.0368098	0.0613497	0.0858896	0.0490798	0.0674847	0.00613497	0.0306748	0.9918	1.0029	1.0302	0.5397	6.1013	0.0214	1.8438	0.1411	1.0014	3.2904	0.1668	0.6641	2334	0.307198	0.20437	0.23479	0.253642	0.541988	0.43916	0.0784062	0.0475578	0.0826907	0.0702656
NP001410_NM020063	1994	ELAVL1	HUR	NP001410.2	326	36090	0.0705521	0.00920245	0.0490798	0.0460123	0.0552147	0.0889571	0.0245399	0.0582822	0.0552147	0.0674847	0.0306748	0.0705521	0.0368098	0.0368098	0.0613497	0.0858896	0.0490798	0.0674847	0.00613497	0.0306748	0.9918	1.0029	1.0302	0.5397	6.1013	0.0214	1.8438	0.1411	1.0014	3.2904	0.1668	0.6641	1164	0.224227	0.339347	0.280069	0.156357	0.504296	0.619416	0.0300687	0.0592784	0.0936426	0.0343643
NP001410_NM024685	1994	ELAVL1	HUR	NP001410.2	326	36090	0.0705521	0.00920245	0.0490798	0.0460123	0.0552147	0.0889571	0.0245399	0.0582822	0.0552147	0.0674847	0.0306748	0.0705521	0.0368098	0.0368098	0.0613497	0.0858896	0.0490798	0.0674847	0.00613497	0.0306748	0.9918	1.0029	1.0302	0.5397	6.1013	0.0214	1.8438	0.1411	1.0014	3.2904	0.1668	0.6641	2172	0.312155	0.188306	0.20488	0.294659	0.517035	0.393186	0.0709024	0.0561694	0.0736648	0.0824125
NP001410_NM020235	1994	ELAVL1	HUR	NP001410.2	326	36090	0.0705521	0.00920245	0.0490798	0.0460123	0.0552147	0.0889571	0.0245399	0.0582822	0.0552147	0.0674847	0.0306748	0.0705521	0.0368098	0.0368098	0.0613497	0.0858896	0.0490798	0.0674847	0.00613497	0.0306748	0.9918	1.0029	1.0302	0.5397	6.1013	0.0214	1.8438	0.1411	1.0014	3.2904	0.1668	0.6641	2736	0.34905	0.205409	0.236477	0.209064	0.585526	0.441886	0.0964912	0.0508041	0.0972222	0.0628655
NP001410_NM003921	1994	ELAVL1	HUR	NP001410.2	326	36090	0.0705521	0.00920245	0.0490798	0.0460123	0.0552147	0.0889571	0.0245399	0.0582822	0.0552147	0.0674847	0.0306748	0.0705521	0.0368098	0.0368098	0.0613497	0.0858896	0.0490798	0.0674847	0.00613497	0.0306748	0.9918	1.0029	1.0302	0.5397	6.1013	0.0214	1.8438	0.1411	1.0014	3.2904	0.1668	0.6641	702	0.337607	0.220798	0.19943	0.242165	0.537037	0.420228	0.0883191	0.0769231	0.0840456	0.0541311
NP001410_NM138559	1994	ELAVL1	HUR	NP001410.2	326	36090	0.0705521	0.00920245	0.0490798	0.0460123	0.0552147	0.0889571	0.0245399	0.0582822	0.0552147	0.0674847	0.0306748	0.0705521	0.0368098	0.0368098	0.0613497	0.0858896	0.0490798	0.0674847	0.00613497	0.0306748	0.9918	1.0029	1.0302	0.5397	6.1013	0.0214	1.8438	0.1411	1.0014	3.2904	0.1668	0.6641	732	0.278689	0.275956	0.23224	0.213115	0.510929	0.508197	0.0601093	0.0614754	0.0765027	0.0601093
NP001410_NM022898	1994	ELAVL1	HUR	NP001410.2	326	36090	0.0705521	0.00920245	0.0490798	0.0460123	0.0552147	0.0889571	0.0245399	0.0582822	0.0552147	0.0674847	0.0306748	0.0705521	0.0368098	0.0368098	0.0613497	0.0858896	0.0490798	0.0674847	0.00613497	0.0306748	0.9918	1.0029	1.0302	0.5397	6.1013	0.0214	1.8438	0.1411	1.0014	3.2904	0.1668	0.6641	2472	0.186489	0.355987	0.331311	0.126214	0.517799	0.687298	0.0319579	0.0582524	0.0732201	0.0186084
NP001410_NM005868	1994	ELAVL1	HUR	NP001410.2	326	36090	0.0705521	0.00920245	0.0490798	0.0460123	0.0552147	0.0889571	0.0245399	0.0582822	0.0552147	0.0674847	0.0306748	0.0705521	0.0368098	0.0368098	0.0613497	0.0858896	0.0490798	0.0674847	0.00613497	0.0306748	0.9918	1.0029	1.0302	0.5397	6.1013	0.0214	1.8438	0.1411	1.0014	3.2904	0.1668	0.6641	357	0.319328	0.154062	0.229692	0.296919	0.54902	0.383754	0.0840336	0.0364146	0.070028	0.0896359
NP001410_NM004330	1994	ELAVL1	HUR	NP001410.2	326	36090	0.0705521	0.00920245	0.0490798	0.0460123	0.0552147	0.0889571	0.0245399	0.0582822	0.0552147	0.0674847	0.0306748	0.0705521	0.0368098	0.0368098	0.0613497	0.0858896	0.0490798	0.0674847	0.00613497	0.0306748	0.9918	1.0029	1.0302	0.5397	6.1013	0.0214	1.8438	0.1411	1.0014	3.2904	0.1668	0.6641	1308	0.291284	0.20948	0.263761	0.235474	0.555046	0.473242	0.0695719	0.0512232	0.0733945	0.07263
NP001410_NM004331	1994	ELAVL1	HUR	NP001410.2	326	36090	0.0705521	0.00920245	0.0490798	0.0460123	0.0552147	0.0889571	0.0245399	0.0582822	0.0552147	0.0674847	0.0306748	0.0705521	0.0368098	0.0368098	0.0613497	0.0858896	0.0490798	0.0674847	0.00613497	0.0306748	0.9918	1.0029	1.0302	0.5397	6.1013	0.0214	1.8438	0.1411	1.0014	3.2904	0.1668	0.6641	660	0.283333	0.25	0.254545	0.212121	0.537879	0.504545	0.0666667	0.0575758	0.0878788	0.0545455
NP001410_NM138278	1994	ELAVL1	HUR	NP001410.2	326	36090	0.0705521	0.00920245	0.0490798	0.0460123	0.0552147	0.0889571	0.0245399	0.0582822	0.0552147	0.0674847	0.0306748	0.0705521	0.0368098	0.0368098	0.0613497	0.0858896	0.0490798	0.0674847	0.00613497	0.0306748	0.9918	1.0029	1.0302	0.5397	6.1013	0.0214	1.8438	0.1411	1.0014	3.2904	0.1668	0.6641	1074	0.249534	0.242086	0.288641	0.219739	0.538175	0.530726	0.0428305	0.0558659	0.0856611	0.0530726
NP001410_NM001113182	1994	ELAVL1	HUR	NP001410.2	326	36090	0.0705521	0.00920245	0.0490798	0.0460123	0.0552147	0.0889571	0.0245399	0.0582822	0.0552147	0.0674847	0.0306748	0.0705521	0.0368098	0.0368098	0.0613497	0.0858896	0.0490798	0.0674847	0.00613497	0.0306748	0.9918	1.0029	1.0302	0.5397	6.1013	0.0214	1.8438	0.1411	1.0014	3.2904	0.1668	0.6641	2406	0.286783	0.267249	0.244389	0.201579	0.531172	0.511638	0.0673317	0.0573566	0.0968412	0.0444722
NP001410_NM007371	1994	ELAVL1	HUR	NP001410.2	326	36090	0.0705521	0.00920245	0.0490798	0.0460123	0.0552147	0.0889571	0.0245399	0.0582822	0.0552147	0.0674847	0.0306748	0.0705521	0.0368098	0.0368098	0.0613497	0.0858896	0.0490798	0.0674847	0.00613497	0.0306748	0.9918	1.0029	1.0302	0.5397	6.1013	0.0214	1.8438	0.1411	1.0014	3.2904	0.1668	0.6641	2181	0.268226	0.299862	0.288858	0.143054	0.557084	0.588721	0.0614397	0.0518111	0.106373	0.0316369
NP001410_NM014299	1994	ELAVL1	HUR	NP001410.2	326	36090	0.0705521	0.00920245	0.0490798	0.0460123	0.0552147	0.0889571	0.0245399	0.0582822	0.0552147	0.0674847	0.0306748	0.0705521	0.0368098	0.0368098	0.0613497	0.0858896	0.0490798	0.0674847	0.00613497	0.0306748	0.9918	1.0029	1.0302	0.5397	6.1013	0.0214	1.8438	0.1411	1.0014	3.2904	0.1668	0.6641	2169	0.288151	0.308437	0.248963	0.154449	0.537114	0.5574	0.0682342	0.0627017	0.0982019	0.0359613
NP001410_NM001136497	1994	ELAVL1	HUR	NP001410.2	326	36090	0.0705521	0.00920245	0.0490798	0.0460123	0.0552147	0.0889571	0.0245399	0.0582822	0.0552147	0.0674847	0.0306748	0.0705521	0.0368098	0.0368098	0.0613497	0.0858896	0.0490798	0.0674847	0.00613497	0.0306748	0.9918	1.0029	1.0302	0.5397	6.1013	0.0214	1.8438	0.1411	1.0014	3.2904	0.1668	0.6641	303	0.346535	0.194719	0.20132	0.257426	0.547855	0.39604	0.0990099	0.0495049	0.0891089	0.0792079
NP001410_NM001007793	1994	ELAVL1	HUR	NP001410.2	326	36090	0.0705521	0.00920245	0.0490798	0.0460123	0.0552147	0.0889571	0.0245399	0.0582822	0.0552147	0.0674847	0.0306748	0.0705521	0.0368098	0.0368098	0.0613497	0.0858896	0.0490798	0.0674847	0.00613497	0.0306748	0.9918	1.0029	1.0302	0.5397	6.1013	0.0214	1.8438	0.1411	1.0014	3.2904	0.1668	0.6641	981	0.276249	0.246687	0.236493	0.240571	0.512742	0.48318	0.0611621	0.0611621	0.0652396	0.0723751
NP001410_NM145306	1994	ELAVL1	HUR	NP001410.2	326	36090	0.0705521	0.00920245	0.0490798	0.0460123	0.0552147	0.0889571	0.0245399	0.0582822	0.0552147	0.0674847	0.0306748	0.0705521	0.0368098	0.0368098	0.0613497	0.0858896	0.0490798	0.0674847	0.00613497	0.0306748	0.9918	1.0029	1.0302	0.5397	6.1013	0.0214	1.8438	0.1411	1.0014	3.2904	0.1668	0.6641	366	0.166667	0.319672	0.295082	0.218579	0.461749	0.614754	0.0218579	0.0409836	0.0601093	0.0382514
NP001410_NM153810	1994	ELAVL1	HUR	NP001410.2	326	36090	0.0705521	0.00920245	0.0490798	0.0460123	0.0552147	0.0889571	0.0245399	0.0582822	0.0552147	0.0674847	0.0306748	0.0705521	0.0368098	0.0368098	0.0613497	0.0858896	0.0490798	0.0674847	0.00613497	0.0306748	0.9918	1.0029	1.0302	0.5397	6.1013	0.0214	1.8438	0.1411	1.0014	3.2904	0.1668	0.6641	1110	0.278378	0.246847	0.248649	0.226126	0.527027	0.495495	0.0585586	0.0504505	0.0783784	0.0747748
NP001410_NM001082969	1994	ELAVL1	HUR	NP001410.2	326	36090	0.0705521	0.00920245	0.0490798	0.0460123	0.0552147	0.0889571	0.0245399	0.0582822	0.0552147	0.0674847	0.0306748	0.0705521	0.0368098	0.0368098	0.0613497	0.0858896	0.0490798	0.0674847	0.00613497	0.0306748	0.9918	1.0029	1.0302	0.5397	6.1013	0.0214	1.8438	0.1411	1.0014	3.2904	0.1668	0.6641	882	0.411565	0.183673	0.227891	0.176871	0.639456	0.411565	0.11678	0.0589569	0.106576	0.0646258
NP001410_NM014267	1994	ELAVL1	HUR	NP001410.2	326	36090	0.0705521	0.00920245	0.0490798	0.0460123	0.0552147	0.0889571	0.0245399	0.0582822	0.0552147	0.0674847	0.0306748	0.0705521	0.0368098	0.0368098	0.0613497	0.0858896	0.0490798	0.0674847	0.00613497	0.0306748	0.9918	1.0029	1.0302	0.5397	6.1013	0.0214	1.8438	0.1411	1.0014	3.2904	0.1668	0.6641	552	0.349638	0.168478	0.266304	0.21558	0.615942	0.434783	0.0887681	0.0416667	0.0996377	0.0833333
NP001410_NM152318	1994	ELAVL1	HUR	NP001410.2	326	36090	0.0705521	0.00920245	0.0490798	0.0460123	0.0552147	0.0889571	0.0245399	0.0582822	0.0552147	0.0674847	0.0306748	0.0705521	0.0368098	0.0368098	0.0613497	0.0858896	0.0490798	0.0674847	0.00613497	0.0306748	0.9918	1.0029	1.0302	0.5397	6.1013	0.0214	1.8438	0.1411	1.0014	3.2904	0.1668	0.6641	558	0.326165	0.215054	0.25448	0.204301	0.580645	0.469534	0.0824373	0.0483871	0.109319	0.0591398
NP001410_NM024496	1994	ELAVL1	HUR	NP001410.2	326	36090	0.0705521	0.00920245	0.0490798	0.0460123	0.0552147	0.0889571	0.0245399	0.0582822	0.0552147	0.0674847	0.0306748	0.0705521	0.0368098	0.0368098	0.0613497	0.0858896	0.0490798	0.0674847	0.00613497	0.0306748	0.9918	1.0029	1.0302	0.5397	6.1013	0.0214	1.8438	0.1411	1.0014	3.2904	0.1668	0.6641	2391	0.174404	0.356336	0.322459	0.146801	0.496863	0.678795	0.0313676	0.0493517	0.0677541	0.0204935
NP001410_NM152460	1994	ELAVL1	HUR	NP001410.2	326	36090	0.0705521	0.00920245	0.0490798	0.0460123	0.0552147	0.0889571	0.0245399	0.0582822	0.0552147	0.0674847	0.0306748	0.0705521	0.0368098	0.0368098	0.0613497	0.0858896	0.0490798	0.0674847	0.00613497	0.0306748	0.9918	1.0029	1.0302	0.5397	6.1013	0.0214	1.8438	0.1411	1.0014	3.2904	0.1668	0.6641	732	0.237705	0.273224	0.262295	0.226776	0.5	0.535519	0.0423497	0.0560109	0.0901639	0.0368852
NP001410_NM001008239	1994	ELAVL1	HUR	NP001410.2	326	36090	0.0705521	0.00920245	0.0490798	0.0460123	0.0552147	0.0889571	0.0245399	0.0582822	0.0552147	0.0674847	0.0306748	0.0705521	0.0368098	0.0368098	0.0613497	0.0858896	0.0490798	0.0674847	0.00613497	0.0306748	0.9918	1.0029	1.0302	0.5397	6.1013	0.0214	1.8438	0.1411	1.0014	3.2904	0.1668	0.6641	1029	0.295432	0.2138	0.273081	0.217687	0.568513	0.48688	0.0641399	0.0524781	0.107872	0.05345
NP001410_NM001136495	1994	ELAVL1	HUR	NP001410.2	326	36090	0.0705521	0.00920245	0.0490798	0.0460123	0.0552147	0.0889571	0.0245399	0.0582822	0.0552147	0.0674847	0.0306748	0.0705521	0.0368098	0.0368098	0.0613497	0.0858896	0.0490798	0.0674847	0.00613497	0.0306748	0.9918	1.0029	1.0302	0.5397	6.1013	0.0214	1.8438	0.1411	1.0014	3.2904	0.1668	0.6641	594	0.225589	0.318182	0.294613	0.161616	0.520202	0.612795	0.0454545	0.040404	0.106061	0.026936
NP001410_NM152608	1994	ELAVL1	HUR	NP001410.2	326	36090	0.0705521	0.00920245	0.0490798	0.0460123	0.0552147	0.0889571	0.0245399	0.0582822	0.0552147	0.0674847	0.0306748	0.0705521	0.0368098	0.0368098	0.0613497	0.0858896	0.0490798	0.0674847	0.00613497	0.0306748	0.9918	1.0029	1.0302	0.5397	6.1013	0.0214	1.8438	0.1411	1.0014	3.2904	0.1668	0.6641	1356	0.295723	0.202802	0.308997	0.192478	0.60472	0.511799	0.0678466	0.0471976	0.106195	0.0471976
NP001410_NM015607	1994	ELAVL1	HUR	NP001410.2	326	36090	0.0705521	0.00920245	0.0490798	0.0460123	0.0552147	0.0889571	0.0245399	0.0582822	0.0552147	0.0674847	0.0306748	0.0705521	0.0368098	0.0368098	0.0613497	0.0858896	0.0490798	0.0674847	0.00613497	0.0306748	0.9918	1.0029	1.0302	0.5397	6.1013	0.0214	1.8438	0.1411	1.0014	3.2904	0.1668	0.6641	747	0.267738	0.232932	0.330656	0.168675	0.598394	0.563588	0.0535475	0.0495315	0.10174	0.0455154
NP001410_NM001100421	1994	ELAVL1	HUR	NP001410.2	326	36090	0.0705521	0.00920245	0.0490798	0.0460123	0.0552147	0.0889571	0.0245399	0.0582822	0.0552147	0.0674847	0.0306748	0.0705521	0.0368098	0.0368098	0.0613497	0.0858896	0.0490798	0.0674847	0.00613497	0.0306748	0.9918	1.0029	1.0302	0.5397	6.1013	0.0214	1.8438	0.1411	1.0014	3.2904	0.1668	0.6641	666	0.352853	0.187688	0.201201	0.258258	0.554054	0.388889	0.0915916	0.0615616	0.0840841	0.0750751
NP001410_NM138807	1994	ELAVL1	HUR	NP001410.2	326	36090	0.0705521	0.00920245	0.0490798	0.0460123	0.0552147	0.0889571	0.0245399	0.0582822	0.0552147	0.0674847	0.0306748	0.0705521	0.0368098	0.0368098	0.0613497	0.0858896	0.0490798	0.0674847	0.00613497	0.0306748	0.9918	1.0029	1.0302	0.5397	6.1013	0.0214	1.8438	0.1411	1.0014	3.2904	0.1668	0.6641	951	0.293375	0.217666	0.238696	0.250263	0.532072	0.456362	0.0704522	0.0504732	0.0778128	0.0683491
NP001410_NM001134470	1994	ELAVL1	HUR	NP001410.2	326	36090	0.0705521	0.00920245	0.0490798	0.0460123	0.0552147	0.0889571	0.0245399	0.0582822	0.0552147	0.0674847	0.0306748	0.0705521	0.0368098	0.0368098	0.0613497	0.0858896	0.0490798	0.0674847	0.00613497	0.0306748	0.9918	1.0029	1.0302	0.5397	6.1013	0.0214	1.8438	0.1411	1.0014	3.2904	0.1668	0.6641	666	0.291291	0.18018	0.25976	0.268769	0.551051	0.43994	0.0810811	0.0510511	0.0645646	0.0675676
NP001410_NM020199	1994	ELAVL1	HUR	NP001410.2	326	36090	0.0705521	0.00920245	0.0490798	0.0460123	0.0552147	0.0889571	0.0245399	0.0582822	0.0552147	0.0674847	0.0306748	0.0705521	0.0368098	0.0368098	0.0613497	0.0858896	0.0490798	0.0674847	0.00613497	0.0306748	0.9918	1.0029	1.0302	0.5397	6.1013	0.0214	1.8438	0.1411	1.0014	3.2904	0.1668	0.6641	798	0.278195	0.250627	0.218045	0.253133	0.496241	0.468672	0.0639098	0.0601504	0.0626566	0.0701754
NP001410_NM022483	1994	ELAVL1	HUR	NP001410.2	326	36090	0.0705521	0.00920245	0.0490798	0.0460123	0.0552147	0.0889571	0.0245399	0.0582822	0.0552147	0.0674847	0.0306748	0.0705521	0.0368098	0.0368098	0.0613497	0.0858896	0.0490798	0.0674847	0.00613497	0.0306748	0.9918	1.0029	1.0302	0.5397	6.1013	0.0214	1.8438	0.1411	1.0014	3.2904	0.1668	0.6641	648	0.236111	0.219136	0.199074	0.345679	0.435185	0.41821	0.0416667	0.0509259	0.0432099	0.0833333
NP001410_NM024573	1994	ELAVL1	HUR	NP001410.2	326	36090	0.0705521	0.00920245	0.0490798	0.0460123	0.0552147	0.0889571	0.0245399	0.0582822	0.0552147	0.0674847	0.0306748	0.0705521	0.0368098	0.0368098	0.0613497	0.0858896	0.0490798	0.0674847	0.00613497	0.0306748	0.9918	1.0029	1.0302	0.5397	6.1013	0.0214	1.8438	0.1411	1.0014	3.2904	0.1668	0.6641	1326	0.313725	0.171946	0.209653	0.304676	0.523379	0.381599	0.0806938	0.0520362	0.0618401	0.0927602
NP001410_NM030939	1994	ELAVL1	HUR	NP001410.2	326	36090	0.0705521	0.00920245	0.0490798	0.0460123	0.0552147	0.0889571	0.0245399	0.0582822	0.0552147	0.0674847	0.0306748	0.0705521	0.0368098	0.0368098	0.0613497	0.0858896	0.0490798	0.0674847	0.00613497	0.0306748	0.9918	1.0029	1.0302	0.5397	6.1013	0.0214	1.8438	0.1411	1.0014	3.2904	0.1668	0.6641	690	0.302899	0.211594	0.218841	0.266667	0.521739	0.430435	0.0710145	0.0492754	0.0869565	0.0666667
NP001410_NM024728	1994	ELAVL1	HUR	NP001410.2	326	36090	0.0705521	0.00920245	0.0490798	0.0460123	0.0552147	0.0889571	0.0245399	0.0582822	0.0552147	0.0674847	0.0306748	0.0705521	0.0368098	0.0368098	0.0613497	0.0858896	0.0490798	0.0674847	0.00613497	0.0306748	0.9918	1.0029	1.0302	0.5397	6.1013	0.0214	1.8438	0.1411	1.0014	3.2904	0.1668	0.6641	1305	0.273563	0.217625	0.264368	0.244444	0.537931	0.481992	0.062069	0.0475096	0.0720307	0.0720307
NP001410_NM152793	1994	ELAVL1	HUR	NP001410.2	326	36090	0.0705521	0.00920245	0.0490798	0.0460123	0.0552147	0.0889571	0.0245399	0.0582822	0.0552147	0.0674847	0.0306748	0.0705521	0.0368098	0.0368098	0.0613497	0.0858896	0.0490798	0.0674847	0.00613497	0.0306748	0.9918	1.0029	1.0302	0.5397	6.1013	0.0214	1.8438	0.1411	1.0014	3.2904	0.1668	0.6641	396	0.229798	0.272727	0.295455	0.20202	0.525253	0.568182	0.0378788	0.0606061	0.0858586	0.0353535
NP001410_NM017994	1994	ELAVL1	HUR	NP001410.2	326	36090	0.0705521	0.00920245	0.0490798	0.0460123	0.0552147	0.0889571	0.0245399	0.0582822	0.0552147	0.0674847	0.0306748	0.0705521	0.0368098	0.0368098	0.0613497	0.0858896	0.0490798	0.0674847	0.00613497	0.0306748	0.9918	1.0029	1.0302	0.5397	6.1013	0.0214	1.8438	0.1411	1.0014	3.2904	0.1668	0.6641	945	0.258201	0.284656	0.222222	0.234921	0.480423	0.506878	0.0529101	0.0666667	0.0624339	0.0613757
NP001410_NM001102401	1994	ELAVL1	HUR	NP001410.2	326	36090	0.0705521	0.00920245	0.0490798	0.0460123	0.0552147	0.0889571	0.0245399	0.0582822	0.0552147	0.0674847	0.0306748	0.0705521	0.0368098	0.0368098	0.0613497	0.0858896	0.0490798	0.0674847	0.00613497	0.0306748	0.9918	1.0029	1.0302	0.5397	6.1013	0.0214	1.8438	0.1411	1.0014	3.2904	0.1668	0.6641	1527	0.258022	0.250819	0.259332	0.231827	0.517354	0.510151	0.0530452	0.0609037	0.0772757	0.0497708
NP001410_NM024828	1994	ELAVL1	HUR	NP001410.2	326	36090	0.0705521	0.00920245	0.0490798	0.0460123	0.0552147	0.0889571	0.0245399	0.0582822	0.0552147	0.0674847	0.0306748	0.0705521	0.0368098	0.0368098	0.0613497	0.0858896	0.0490798	0.0674847	0.00613497	0.0306748	0.9918	1.0029	1.0302	0.5397	6.1013	0.0214	1.8438	0.1411	1.0014	3.2904	0.1668	0.6641	1086	0.309392	0.200737	0.290055	0.199816	0.599448	0.490792	0.0764273	0.0414365	0.106814	0.0524862
NP001410_NM004056	1994	ELAVL1	HUR	NP001410.2	326	36090	0.0705521	0.00920245	0.0490798	0.0460123	0.0552147	0.0889571	0.0245399	0.0582822	0.0552147	0.0674847	0.0306748	0.0705521	0.0368098	0.0368098	0.0613497	0.0858896	0.0490798	0.0674847	0.00613497	0.0306748	0.9918	1.0029	1.0302	0.5397	6.1013	0.0214	1.8438	0.1411	1.0014	3.2904	0.1668	0.6641	873	0.261168	0.214204	0.269187	0.255441	0.530355	0.483391	0.0584192	0.0504009	0.0790378	0.0641466
NP001410_NM005184	1994	ELAVL1	HUR	NP001410.2	326	36090	0.0705521	0.00920245	0.0490798	0.0460123	0.0552147	0.0889571	0.0245399	0.0582822	0.0552147	0.0674847	0.0306748	0.0705521	0.0368098	0.0368098	0.0613497	0.0858896	0.0490798	0.0674847	0.00613497	0.0306748	0.9918	1.0029	1.0302	0.5397	6.1013	0.0214	1.8438	0.1411	1.0014	3.2904	0.1668	0.6641	450	0.284444	0.195556	0.333333	0.186667	0.617778	0.528889	0.0377778	0.0577778	0.108889	0.0733333
NP001410_NM172115	1994	ELAVL1	HUR	NP001410.2	326	36090	0.0705521	0.00920245	0.0490798	0.0460123	0.0552147	0.0889571	0.0245399	0.0582822	0.0552147	0.0674847	0.0306748	0.0705521	0.0368098	0.0368098	0.0613497	0.0858896	0.0490798	0.0674847	0.00613497	0.0306748	0.9918	1.0029	1.0302	0.5397	6.1013	0.0214	1.8438	0.1411	1.0014	3.2904	0.1668	0.6641	1437	0.308977	0.204593	0.235212	0.251218	0.544189	0.439805	0.0709812	0.0605428	0.0821155	0.0716771
NP001410_NM018448	1994	ELAVL1	HUR	NP001410.2	326	36090	0.0705521	0.00920245	0.0490798	0.0460123	0.0552147	0.0889571	0.0245399	0.0582822	0.0552147	0.0674847	0.0306748	0.0705521	0.0368098	0.0368098	0.0613497	0.0858896	0.0490798	0.0674847	0.00613497	0.0306748	0.9918	1.0029	1.0302	0.5397	6.1013	0.0214	1.8438	0.1411	1.0014	3.2904	0.1668	0.6641	3693	0.304089	0.188735	0.210398	0.296778	0.514487	0.399133	0.070945	0.049824	0.0766315	0.0820471
NP001410_NM001024649	1994	ELAVL1	HUR	NP001410.2	326	36090	0.0705521	0.00920245	0.0490798	0.0460123	0.0552147	0.0889571	0.0245399	0.0582822	0.0552147	0.0674847	0.0306748	0.0705521	0.0368098	0.0368098	0.0613497	0.0858896	0.0490798	0.0674847	0.00613497	0.0306748	0.9918	1.0029	1.0302	0.5397	6.1013	0.0214	1.8438	0.1411	1.0014	3.2904	0.1668	0.6641	1779	0.315346	0.187746	0.259696	0.237212	0.575042	0.447442	0.0764474	0.0505902	0.0860034	0.074199
NP001410_NM006135	1994	ELAVL1	HUR	NP001410.2	326	36090	0.0705521	0.00920245	0.0490798	0.0460123	0.0552147	0.0889571	0.0245399	0.0582822	0.0552147	0.0674847	0.0306748	0.0705521	0.0368098	0.0368098	0.0613497	0.0858896	0.0490798	0.0674847	0.00613497	0.0306748	0.9918	1.0029	1.0302	0.5397	6.1013	0.0214	1.8438	0.1411	1.0014	3.2904	0.1668	0.6641	861	0.326365	0.202091	0.225319	0.246225	0.551684	0.42741	0.0789779	0.0569106	0.0859466	0.0813008
NP001410_NM006136	1994	ELAVL1	HUR	NP001410.2	326	36090	0.0705521	0.00920245	0.0490798	0.0460123	0.0552147	0.0889571	0.0245399	0.0582822	0.0552147	0.0674847	0.0306748	0.0705521	0.0368098	0.0368098	0.0613497	0.0858896	0.0490798	0.0674847	0.00613497	0.0306748	0.9918	1.0029	1.0302	0.5397	6.1013	0.0214	1.8438	0.1411	1.0014	3.2904	0.1668	0.6641	861	0.348432	0.16957	0.224158	0.25784	0.57259	0.393728	0.0940767	0.047619	0.0894309	0.087108
NP001410_NM022900	1994	ELAVL1	HUR	NP001410.2	326	36090	0.0705521	0.00920245	0.0490798	0.0460123	0.0552147	0.0889571	0.0245399	0.0582822	0.0552147	0.0674847	0.0306748	0.0705521	0.0368098	0.0368098	0.0613497	0.0858896	0.0490798	0.0674847	0.00613497	0.0306748	0.9918	1.0029	1.0302	0.5397	6.1013	0.0214	1.8438	0.1411	1.0014	3.2904	0.1668	0.6641	2394	0.290727	0.177109	0.198413	0.333751	0.48914	0.375522	0.0685046	0.0401003	0.0580618	0.0964912
NP001410_NM032983	1994	ELAVL1	HUR	NP001410.2	326	36090	0.0705521	0.00920245	0.0490798	0.0460123	0.0552147	0.0889571	0.0245399	0.0582822	0.0552147	0.0674847	0.0306748	0.0705521	0.0368098	0.0368098	0.0613497	0.0858896	0.0490798	0.0674847	0.00613497	0.0306748	0.9918	1.0029	1.0302	0.5397	6.1013	0.0214	1.8438	0.1411	1.0014	3.2904	0.1668	0.6641	327	0.247706	0.24159	0.29052	0.220183	0.538226	0.53211	0.0550459	0.0397554	0.0825688	0.0489297
NP001410_NM022845	1994	ELAVL1	HUR	NP001410.2	326	36090	0.0705521	0.00920245	0.0490798	0.0460123	0.0552147	0.0889571	0.0245399	0.0582822	0.0552147	0.0674847	0.0306748	0.0705521	0.0368098	0.0368098	0.0613497	0.0858896	0.0490798	0.0674847	0.00613497	0.0306748	0.9918	1.0029	1.0302	0.5397	6.1013	0.0214	1.8438	0.1411	1.0014	3.2904	0.1668	0.6641	564	0.269504	0.223404	0.306738	0.200355	0.576241	0.530142	0.0567376	0.0496454	0.106383	0.0425532
NP001410_NM005188	1994	ELAVL1	HUR	NP001410.2	326	36090	0.0705521	0.00920245	0.0490798	0.0460123	0.0552147	0.0889571	0.0245399	0.0582822	0.0552147	0.0674847	0.0306748	0.0705521	0.0368098	0.0368098	0.0613497	0.0858896	0.0490798	0.0674847	0.00613497	0.0306748	0.9918	1.0029	1.0302	0.5397	6.1013	0.0214	1.8438	0.1411	1.0014	3.2904	0.1668	0.6641	2721	0.253583	0.271591	0.238148	0.236678	0.491731	0.509739	0.0540243	0.0529217	0.0683572	0.062477
NP001410_NM004354	1994	ELAVL1	HUR	NP001410.2	326	36090	0.0705521	0.00920245	0.0490798	0.0460123	0.0552147	0.0889571	0.0245399	0.0582822	0.0552147	0.0674847	0.0306748	0.0705521	0.0368098	0.0368098	0.0613497	0.0858896	0.0490798	0.0674847	0.00613497	0.0306748	0.9918	1.0029	1.0302	0.5397	6.1013	0.0214	1.8438	0.1411	1.0014	3.2904	0.1668	0.6641	1035	0.289855	0.189372	0.222222	0.298551	0.512077	0.411594	0.07343	0.0521739	0.0743961	0.0589372
NP001410_NM006835	1994	ELAVL1	HUR	NP001410.2	326	36090	0.0705521	0.00920245	0.0490798	0.0460123	0.0552147	0.0889571	0.0245399	0.0582822	0.0552147	0.0674847	0.0306748	0.0705521	0.0368098	0.0368098	0.0613497	0.0858896	0.0490798	0.0674847	0.00613497	0.0306748	0.9918	1.0029	1.0302	0.5397	6.1013	0.0214	1.8438	0.1411	1.0014	3.2904	0.1668	0.6641	1134	0.268959	0.231922	0.216049	0.283069	0.485009	0.447972	0.0608466	0.0467372	0.0776014	0.0652557
NP001410_NM181698	1994	ELAVL1	HUR	NP001410.2	326	36090	0.0705521	0.00920245	0.0490798	0.0460123	0.0552147	0.0889571	0.0245399	0.0582822	0.0552147	0.0674847	0.0306748	0.0705521	0.0368098	0.0368098	0.0613497	0.0858896	0.0490798	0.0674847	0.00613497	0.0306748	0.9918	1.0029	1.0302	0.5397	6.1013	0.0214	1.8438	0.1411	1.0014	3.2904	0.1668	0.6641	864	0.28125	0.253472	0.224537	0.240741	0.505787	0.478009	0.0590278	0.0555556	0.0798611	0.0694444
NP001410_NM001142404	1994	ELAVL1	HUR	NP001410.2	326	36090	0.0705521	0.00920245	0.0490798	0.0460123	0.0552147	0.0889571	0.0245399	0.0582822	0.0552147	0.0674847	0.0306748	0.0705521	0.0368098	0.0368098	0.0613497	0.0858896	0.0490798	0.0674847	0.00613497	0.0306748	0.9918	1.0029	1.0302	0.5397	6.1013	0.0214	1.8438	0.1411	1.0014	3.2904	0.1668	0.6641	474	0.255274	0.301688	0.21097	0.232068	0.466245	0.512658	0.056962	0.0886076	0.056962	0.035865
NP001410_NM001042587	1994	ELAVL1	HUR	NP001410.2	326	36090	0.0705521	0.00920245	0.0490798	0.0460123	0.0552147	0.0889571	0.0245399	0.0582822	0.0552147	0.0674847	0.0306748	0.0705521	0.0368098	0.0368098	0.0613497	0.0858896	0.0490798	0.0674847	0.00613497	0.0306748	0.9918	1.0029	1.0302	0.5397	6.1013	0.0214	1.8438	0.1411	1.0014	3.2904	0.1668	0.6641	306	0.166667	0.254902	0.30719	0.271242	0.473856	0.562092	0.0163399	0.0261438	0.0620915	0.0522876
NP001410_NM012120	1994	ELAVL1	HUR	NP001410.2	326	36090	0.0705521	0.00920245	0.0490798	0.0460123	0.0552147	0.0889571	0.0245399	0.0582822	0.0552147	0.0674847	0.0306748	0.0705521	0.0368098	0.0368098	0.0613497	0.0858896	0.0490798	0.0674847	0.00613497	0.0306748	0.9918	1.0029	1.0302	0.5397	6.1013	0.0214	1.8438	0.1411	1.0014	3.2904	0.1668	0.6641	1920	0.367188	0.185417	0.218229	0.229167	0.585417	0.403646	0.10625	0.059375	0.0901042	0.0640625
NP001410_NM006110	1994	ELAVL1	HUR	NP001410.2	326	36090	0.0705521	0.00920245	0.0490798	0.0460123	0.0552147	0.0889571	0.0245399	0.0582822	0.0552147	0.0674847	0.0306748	0.0705521	0.0368098	0.0368098	0.0613497	0.0858896	0.0490798	0.0674847	0.00613497	0.0306748	0.9918	1.0029	1.0302	0.5397	6.1013	0.0214	1.8438	0.1411	1.0014	3.2904	0.1668	0.6641	1026	0.231969	0.247563	0.342105	0.178363	0.574074	0.589669	0.037037	0.0555556	0.0896686	0.0389864
NP001410_NM000073	1994	ELAVL1	HUR	NP001410.2	326	36090	0.0705521	0.00920245	0.0490798	0.0460123	0.0552147	0.0889571	0.0245399	0.0582822	0.0552147	0.0674847	0.0306748	0.0705521	0.0368098	0.0368098	0.0613497	0.0858896	0.0490798	0.0674847	0.00613497	0.0306748	0.9918	1.0029	1.0302	0.5397	6.1013	0.0214	1.8438	0.1411	1.0014	3.2904	0.1668	0.6641	549	0.300546	0.214936	0.240437	0.24408	0.540984	0.455373	0.0765027	0.0510018	0.0801457	0.0655738
NP001410_NM044472	1994	ELAVL1	HUR	NP001410.2	326	36090	0.0705521	0.00920245	0.0490798	0.0460123	0.0552147	0.0889571	0.0245399	0.0582822	0.0552147	0.0674847	0.0306748	0.0705521	0.0368098	0.0368098	0.0613497	0.0858896	0.0490798	0.0674847	0.00613497	0.0306748	0.9918	1.0029	1.0302	0.5397	6.1013	0.0214	1.8438	0.1411	1.0014	3.2904	0.1668	0.6641	576	0.286458	0.211806	0.222222	0.279514	0.508681	0.434028	0.0642361	0.0677083	0.0659722	0.0625
NP001410_NM020239	1994	ELAVL1	HUR	NP001410.2	326	36090	0.0705521	0.00920245	0.0490798	0.0460123	0.0552147	0.0889571	0.0245399	0.0582822	0.0552147	0.0674847	0.0306748	0.0705521	0.0368098	0.0368098	0.0613497	0.0858896	0.0490798	0.0674847	0.00613497	0.0306748	0.9918	1.0029	1.0302	0.5397	6.1013	0.0214	1.8438	0.1411	1.0014	3.2904	0.1668	0.6641	240	0.291667	0.183333	0.329167	0.195833	0.620833	0.5125	0.0541667	0.0541667	0.1	0.0708333
NP001410_NM001038702	1994	ELAVL1	HUR	NP001410.2	326	36090	0.0705521	0.00920245	0.0490798	0.0460123	0.0552147	0.0889571	0.0245399	0.0582822	0.0552147	0.0674847	0.0306748	0.0705521	0.0368098	0.0368098	0.0613497	0.0858896	0.0490798	0.0674847	0.00613497	0.0306748	0.9918	1.0029	1.0302	0.5397	6.1013	0.0214	1.8438	0.1411	1.0014	3.2904	0.1668	0.6641	255	0.278431	0.192157	0.290196	0.239216	0.568627	0.482353	0.0588235	0.0392157	0.0941176	0.0745098
NP001410_NM024529	1994	ELAVL1	HUR	NP001410.2	326	36090	0.0705521	0.00920245	0.0490798	0.0460123	0.0552147	0.0889571	0.0245399	0.0582822	0.0552147	0.0674847	0.0306748	0.0705521	0.0368098	0.0368098	0.0613497	0.0858896	0.0490798	0.0674847	0.00613497	0.0306748	0.9918	1.0029	1.0302	0.5397	6.1013	0.0214	1.8438	0.1411	1.0014	3.2904	0.1668	0.6641	1596	0.323935	0.207393	0.232456	0.236216	0.556391	0.43985	0.0795739	0.0601504	0.0877193	0.0670426
NP001410_NM145701	1994	ELAVL1	HUR	NP001410.2	326	36090	0.0705521	0.00920245	0.0490798	0.0460123	0.0552147	0.0889571	0.0245399	0.0582822	0.0552147	0.0674847	0.0306748	0.0705521	0.0368098	0.0368098	0.0613497	0.0858896	0.0490798	0.0674847	0.00613497	0.0306748	0.9918	1.0029	1.0302	0.5397	6.1013	0.0214	1.8438	0.1411	1.0014	3.2904	0.1668	0.6641	726	0.214876	0.287879	0.325069	0.172176	0.539945	0.612948	0.0275482	0.0647383	0.0867769	0.0275482
NP001410_NM001792	1994	ELAVL1	HUR	NP001410.2	326	36090	0.0705521	0.00920245	0.0490798	0.0460123	0.0552147	0.0889571	0.0245399	0.0582822	0.0552147	0.0674847	0.0306748	0.0705521	0.0368098	0.0368098	0.0613497	0.0858896	0.0490798	0.0674847	0.00613497	0.0306748	0.9918	1.0029	1.0302	0.5397	6.1013	0.0214	1.8438	0.1411	1.0014	3.2904	0.1668	0.6641	2721	0.292172	0.230062	0.234105	0.24366	0.526277	0.464168	0.0665197	0.0584344	0.0712973	0.07828
NP001410_NM052987	1994	ELAVL1	HUR	NP001410.2	326	36090	0.0705521	0.00920245	0.0490798	0.0460123	0.0552147	0.0889571	0.0245399	0.0582822	0.0552147	0.0674847	0.0306748	0.0705521	0.0368098	0.0368098	0.0613497	0.0858896	0.0490798	0.0674847	0.00613497	0.0306748	0.9918	1.0029	1.0302	0.5397	6.1013	0.0214	1.8438	0.1411	1.0014	3.2904	0.1668	0.6641	819	0.205128	0.297924	0.299145	0.197802	0.504274	0.59707	0.037851	0.0561661	0.0708181	0.03663
NP001410_NM004642	1994	ELAVL1	HUR	NP001410.2	326	36090	0.0705521	0.00920245	0.0490798	0.0460123	0.0552147	0.0889571	0.0245399	0.0582822	0.0552147	0.0674847	0.0306748	0.0705521	0.0368098	0.0368098	0.0613497	0.0858896	0.0490798	0.0674847	0.00613497	0.0306748	0.9918	1.0029	1.0302	0.5397	6.1013	0.0214	1.8438	0.1411	1.0014	3.2904	0.1668	0.6641	348	0.244253	0.307471	0.295977	0.152299	0.54023	0.603448	0.0431034	0.0718391	0.0833333	0.0344828
NP001410_NM001259	1994	ELAVL1	HUR	NP001410.2	326	36090	0.0705521	0.00920245	0.0490798	0.0460123	0.0552147	0.0889571	0.0245399	0.0582822	0.0552147	0.0674847	0.0306748	0.0705521	0.0368098	0.0368098	0.0613497	0.0858896	0.0490798	0.0674847	0.00613497	0.0306748	0.9918	1.0029	1.0302	0.5397	6.1013	0.0214	1.8438	0.1411	1.0014	3.2904	0.1668	0.6641	981	0.255861	0.256881	0.262997	0.224261	0.518858	0.519878	0.0530071	0.0621814	0.077472	0.0438328
NP001410_NM004064	1994	ELAVL1	HUR	NP001410.2	326	36090	0.0705521	0.00920245	0.0490798	0.0460123	0.0552147	0.0889571	0.0245399	0.0582822	0.0552147	0.0674847	0.0306748	0.0705521	0.0368098	0.0368098	0.0613497	0.0858896	0.0490798	0.0674847	0.00613497	0.0306748	0.9918	1.0029	1.0302	0.5397	6.1013	0.0214	1.8438	0.1411	1.0014	3.2904	0.1668	0.6641	597	0.269682	0.274707	0.309883	0.145729	0.579564	0.58459	0.0670017	0.0586265	0.102178	0.0251256
NP001410_NM017548	1994	ELAVL1	HUR	NP001410.2	326	36090	0.0705521	0.00920245	0.0490798	0.0460123	0.0552147	0.0889571	0.0245399	0.0582822	0.0552147	0.0674847	0.0306748	0.0705521	0.0368098	0.0368098	0.0613497	0.0858896	0.0490798	0.0674847	0.00613497	0.0306748	0.9918	1.0029	1.0302	0.5397	6.1013	0.0214	1.8438	0.1411	1.0014	3.2904	0.1668	0.6641	777	0.320463	0.217503	0.32175	0.140283	0.642214	0.539254	0.0913771	0.0553411	0.105534	0.03861
NP001410_NM004364	1994	ELAVL1	HUR	NP001410.2	326	36090	0.0705521	0.00920245	0.0490798	0.0460123	0.0552147	0.0889571	0.0245399	0.0582822	0.0552147	0.0674847	0.0306748	0.0705521	0.0368098	0.0368098	0.0613497	0.0858896	0.0490798	0.0674847	0.00613497	0.0306748	0.9918	1.0029	1.0302	0.5397	6.1013	0.0214	1.8438	0.1411	1.0014	3.2904	0.1668	0.6641	1077	0.155989	0.402043	0.345404	0.0965645	0.501393	0.747447	0.0241411	0.0519963	0.0649954	0.0139276
NP001410_NM001806	1994	ELAVL1	HUR	NP001410.2	326	36090	0.0705521	0.00920245	0.0490798	0.0460123	0.0552147	0.0889571	0.0245399	0.0582822	0.0552147	0.0674847	0.0306748	0.0705521	0.0368098	0.0368098	0.0613497	0.0858896	0.0490798	0.0674847	0.00613497	0.0306748	0.9918	1.0029	1.0302	0.5397	6.1013	0.0214	1.8438	0.1411	1.0014	3.2904	0.1668	0.6641	453	0.344371	0.222958	0.269316	0.163355	0.613687	0.492274	0.0838852	0.0640177	0.11479	0.0485651
NP001410_NM001813	1994	ELAVL1	HUR	NP001410.2	326	36090	0.0705521	0.00920245	0.0490798	0.0460123	0.0552147	0.0889571	0.0245399	0.0582822	0.0552147	0.0674847	0.0306748	0.0705521	0.0368098	0.0368098	0.0613497	0.0858896	0.0490798	0.0674847	0.00613497	0.0306748	0.9918	1.0029	1.0302	0.5397	6.1013	0.0214	1.8438	0.1411	1.0014	3.2904	0.1668	0.6641	8106	0.42117	0.152973	0.200222	0.225635	0.621392	0.353195	0.130891	0.055021	0.0996792	0.0779669
NP001410_NM022909	1994	ELAVL1	HUR	NP001410.2	326	36090	0.0705521	0.00920245	0.0490798	0.0460123	0.0552147	0.0889571	0.0245399	0.0582822	0.0552147	0.0674847	0.0306748	0.0705521	0.0368098	0.0368098	0.0613497	0.0858896	0.0490798	0.0674847	0.00613497	0.0306748	0.9918	1.0029	1.0302	0.5397	6.1013	0.0214	1.8438	0.1411	1.0014	3.2904	0.1668	0.6641	96	0.302083	0.145833	0.270833	0.28125	0.572917	0.416667	0.0833333	0.0208333	0.09375	0.0729167
NP001410_NM014679	1994	ELAVL1	HUR	NP001410.2	326	36090	0.0705521	0.00920245	0.0490798	0.0460123	0.0552147	0.0889571	0.0245399	0.0582822	0.0552147	0.0674847	0.0306748	0.0705521	0.0368098	0.0368098	0.0613497	0.0858896	0.0490798	0.0674847	0.00613497	0.0306748	0.9918	1.0029	1.0302	0.5397	6.1013	0.0214	1.8438	0.1411	1.0014	3.2904	0.1668	0.6641	1503	0.3666	0.184963	0.221557	0.22688	0.588157	0.40652	0.10845	0.0512309	0.0991351	0.0665336
NP001410_NM006090	1994	ELAVL1	HUR	NP001410.2	326	36090	0.0705521	0.00920245	0.0490798	0.0460123	0.0552147	0.0889571	0.0245399	0.0582822	0.0552147	0.0674847	0.0306748	0.0705521	0.0368098	0.0368098	0.0613497	0.0858896	0.0490798	0.0674847	0.00613497	0.0306748	0.9918	1.0029	1.0302	0.5397	6.1013	0.0214	1.8438	0.1411	1.0014	3.2904	0.1668	0.6641	1251	0.26299	0.200639	0.209432	0.326938	0.472422	0.410072	0.0559552	0.0527578	0.0495604	0.0871303
NP001410_NM033377	1994	ELAVL1	HUR	NP001410.2	326	36090	0.0705521	0.00920245	0.0490798	0.0460123	0.0552147	0.0889571	0.0245399	0.0582822	0.0552147	0.0674847	0.0306748	0.0705521	0.0368098	0.0368098	0.0613497	0.0858896	0.0490798	0.0674847	0.00613497	0.0306748	0.9918	1.0029	1.0302	0.5397	6.1013	0.0214	1.8438	0.1411	1.0014	3.2904	0.1668	0.6641	468	0.147436	0.382479	0.282051	0.188034	0.429487	0.66453	0.0235043	0.0491453	0.0405983	0.0299145
NP001410_NM001274	1994	ELAVL1	HUR	NP001410.2	326	36090	0.0705521	0.00920245	0.0490798	0.0460123	0.0552147	0.0889571	0.0245399	0.0582822	0.0552147	0.0674847	0.0306748	0.0705521	0.0368098	0.0368098	0.0613497	0.0858896	0.0490798	0.0674847	0.00613497	0.0306748	0.9918	1.0029	1.0302	0.5397	6.1013	0.0214	1.8438	0.1411	1.0014	3.2904	0.1668	0.6641	1431	0.319357	0.189378	0.228512	0.262753	0.547869	0.41789	0.081761	0.0461216	0.0831586	0.0796646
NP001410_NM012110	1994	ELAVL1	HUR	NP001410.2	326	36090	0.0705521	0.00920245	0.0490798	0.0460123	0.0552147	0.0889571	0.0245399	0.0582822	0.0552147	0.0674847	0.0306748	0.0705521	0.0368098	0.0368098	0.0613497	0.0858896	0.0490798	0.0674847	0.00613497	0.0306748	0.9918	1.0029	1.0302	0.5397	6.1013	0.0214	1.8438	0.1411	1.0014	3.2904	0.1668	0.6641	498	0.295181	0.196787	0.248996	0.259036	0.544177	0.445783	0.0763052	0.0542169	0.0783133	0.0662651
NP001410_NM017444	1994	ELAVL1	HUR	NP001410.2	326	36090	0.0705521	0.00920245	0.0490798	0.0460123	0.0552147	0.0889571	0.0245399	0.0582822	0.0552147	0.0674847	0.0306748	0.0705521	0.0368098	0.0368098	0.0613497	0.0858896	0.0490798	0.0674847	0.00613497	0.0306748	0.9918	1.0029	1.0302	0.5397	6.1013	0.0214	1.8438	0.1411	1.0014	3.2904	0.1668	0.6641	396	0.315657	0.217172	0.260101	0.207071	0.575758	0.477273	0.0732323	0.0530303	0.0959596	0.0606061
NP001410_NM152889	1994	ELAVL1	HUR	NP001410.2	326	36090	0.0705521	0.00920245	0.0490798	0.0460123	0.0552147	0.0889571	0.0245399	0.0582822	0.0552147	0.0674847	0.0306748	0.0705521	0.0368098	0.0368098	0.0613497	0.0858896	0.0490798	0.0674847	0.00613497	0.0306748	0.9918	1.0029	1.0302	0.5397	6.1013	0.0214	1.8438	0.1411	1.0014	3.2904	0.1668	0.6641	1026	0.12963	0.392788	0.323587	0.153996	0.453216	0.716374	0.0175439	0.0516569	0.0467836	0.0126706
NP001410_NM014918	1994	ELAVL1	HUR	NP001410.2	326	36090	0.0705521	0.00920245	0.0490798	0.0460123	0.0552147	0.0889571	0.0245399	0.0582822	0.0552147	0.0674847	0.0306748	0.0705521	0.0368098	0.0368098	0.0613497	0.0858896	0.0490798	0.0674847	0.00613497	0.0306748	0.9918	1.0029	1.0302	0.5397	6.1013	0.0214	1.8438	0.1411	1.0014	3.2904	0.1668	0.6641	2409	0.251972	0.254878	0.273142	0.220008	0.525114	0.52802	0.0531341	0.0518888	0.0772105	0.0514736
NP001410_NM001280	1994	ELAVL1	HUR	NP001410.2	326	36090	0.0705521	0.00920245	0.0490798	0.0460123	0.0552147	0.0889571	0.0245399	0.0582822	0.0552147	0.0674847	0.0306748	0.0705521	0.0368098	0.0368098	0.0613497	0.0858896	0.0490798	0.0674847	0.00613497	0.0306748	0.9918	1.0029	1.0302	0.5397	6.1013	0.0214	1.8438	0.1411	1.0014	3.2904	0.1668	0.6641	519	0.233141	0.210019	0.360308	0.196532	0.593449	0.570328	0.0289017	0.061657	0.0982659	0.0366089
NP001410_NM001040200	1994	ELAVL1	HUR	NP001410.2	326	36090	0.0705521	0.00920245	0.0490798	0.0460123	0.0552147	0.0889571	0.0245399	0.0582822	0.0552147	0.0674847	0.0306748	0.0705521	0.0368098	0.0368098	0.0613497	0.0858896	0.0490798	0.0674847	0.00613497	0.0306748	0.9918	1.0029	1.0302	0.5397	6.1013	0.0214	1.8438	0.1411	1.0014	3.2904	0.1668	0.6641	477	0.207547	0.230608	0.238994	0.322851	0.446541	0.469602	0.0356394	0.0503145	0.0440252	0.0649895
NP001410_NM014666	1994	ELAVL1	HUR	NP001410.2	326	36090	0.0705521	0.00920245	0.0490798	0.0460123	0.0552147	0.0889571	0.0245399	0.0582822	0.0552147	0.0674847	0.0306748	0.0705521	0.0368098	0.0368098	0.0613497	0.0858896	0.0490798	0.0674847	0.00613497	0.0306748	0.9918	1.0029	1.0302	0.5397	6.1013	0.0214	1.8438	0.1411	1.0014	3.2904	0.1668	0.6641	1878	0.306709	0.22098	0.241214	0.231097	0.547923	0.462194	0.0686901	0.057508	0.0867945	0.0734824
NP001410_NM030629	1994	ELAVL1	HUR	NP001410.2	326	36090	0.0705521	0.00920245	0.0490798	0.0460123	0.0552147	0.0889571	0.0245399	0.0582822	0.0552147	0.0674847	0.0306748	0.0705521	0.0368098	0.0368098	0.0613497	0.0858896	0.0490798	0.0674847	0.00613497	0.0306748	0.9918	1.0029	1.0302	0.5397	6.1013	0.0214	1.8438	0.1411	1.0014	3.2904	0.1668	0.6641	2040	0.237255	0.305882	0.267647	0.189216	0.504902	0.573529	0.0534314	0.0656863	0.0705882	0.0357843
NP001410_NM017801	1994	ELAVL1	HUR	NP001410.2	326	36090	0.0705521	0.00920245	0.0490798	0.0460123	0.0552147	0.0889571	0.0245399	0.0582822	0.0552147	0.0674847	0.0306748	0.0705521	0.0368098	0.0368098	0.0613497	0.0858896	0.0490798	0.0674847	0.00613497	0.0306748	0.9918	1.0029	1.0302	0.5397	6.1013	0.0214	1.8438	0.1411	1.0014	3.2904	0.1668	0.6641	552	0.228261	0.226449	0.235507	0.309783	0.463768	0.461957	0.0398551	0.0525362	0.0615942	0.0615942
NP001410_NM015455	1994	ELAVL1	HUR	NP001410.2	326	36090	0.0705521	0.00920245	0.0490798	0.0460123	0.0552147	0.0889571	0.0245399	0.0582822	0.0552147	0.0674847	0.0306748	0.0705521	0.0368098	0.0368098	0.0613497	0.0858896	0.0490798	0.0674847	0.00613497	0.0306748	0.9918	1.0029	1.0302	0.5397	6.1013	0.0214	1.8438	0.1411	1.0014	3.2904	0.1668	0.6641	1674	0.30227	0.215054	0.215651	0.267025	0.517921	0.430705	0.0764636	0.0645161	0.0681004	0.067503
NP001410_NM020751	1994	ELAVL1	HUR	NP001410.2	326	36090	0.0705521	0.00920245	0.0490798	0.0460123	0.0552147	0.0889571	0.0245399	0.0582822	0.0552147	0.0674847	0.0306748	0.0705521	0.0368098	0.0368098	0.0613497	0.0858896	0.0490798	0.0674847	0.00613497	0.0306748	0.9918	1.0029	1.0302	0.5397	6.1013	0.0214	1.8438	0.1411	1.0014	3.2904	0.1668	0.6641	1974	0.313576	0.203141	0.221378	0.261905	0.534954	0.424519	0.0800405	0.0592705	0.0795339	0.0739615
NP001410_NM016138	1994	ELAVL1	HUR	NP001410.2	326	36090	0.0705521	0.00920245	0.0490798	0.0460123	0.0552147	0.0889571	0.0245399	0.0582822	0.0552147	0.0674847	0.0306748	0.0705521	0.0368098	0.0368098	0.0613497	0.0858896	0.0490798	0.0674847	0.00613497	0.0306748	0.9918	1.0029	1.0302	0.5397	6.1013	0.0214	1.8438	0.1411	1.0014	3.2904	0.1668	0.6641	654	0.252294	0.229358	0.313456	0.204893	0.565749	0.542813	0.0519878	0.0366972	0.0749235	0.0718654
NP001410_NM014325	1994	ELAVL1	HUR	NP001410.2	326	36090	0.0705521	0.00920245	0.0490798	0.0460123	0.0552147	0.0889571	0.0245399	0.0582822	0.0552147	0.0674847	0.0306748	0.0705521	0.0368098	0.0368098	0.0613497	0.0858896	0.0490798	0.0674847	0.00613497	0.0306748	0.9918	1.0029	1.0302	0.5397	6.1013	0.0214	1.8438	0.1411	1.0014	3.2904	0.1668	0.6641	1425	0.291228	0.225263	0.260351	0.223158	0.551579	0.485614	0.0617544	0.0540351	0.085614	0.0715789
NP001410_NM021149	1994	ELAVL1	HUR	NP001410.2	326	36090	0.0705521	0.00920245	0.0490798	0.0460123	0.0552147	0.0889571	0.0245399	0.0582822	0.0552147	0.0674847	0.0306748	0.0705521	0.0368098	0.0368098	0.0613497	0.0858896	0.0490798	0.0674847	0.00613497	0.0306748	0.9918	1.0029	1.0302	0.5397	6.1013	0.0214	1.8438	0.1411	1.0014	3.2904	0.1668	0.6641	429	0.242424	0.25641	0.32634	0.174825	0.568765	0.582751	0.04662	0.0582751	0.0862471	0.041958
NP001410_NM004718	1994	ELAVL1	HUR	NP001410.2	326	36090	0.0705521	0.00920245	0.0490798	0.0460123	0.0552147	0.0889571	0.0245399	0.0582822	0.0552147	0.0674847	0.0306748	0.0705521	0.0368098	0.0368098	0.0613497	0.0858896	0.0490798	0.0674847	0.00613497	0.0306748	0.9918	1.0029	1.0302	0.5397	6.1013	0.0214	1.8438	0.1411	1.0014	3.2904	0.1668	0.6641	345	0.275362	0.266667	0.234783	0.223188	0.510145	0.501449	0.0492754	0.0724638	0.0637681	0.0521739
NP001410_NM030627	1994	ELAVL1	HUR	NP001410.2	326	36090	0.0705521	0.00920245	0.0490798	0.0460123	0.0552147	0.0889571	0.0245399	0.0582822	0.0552147	0.0674847	0.0306748	0.0705521	0.0368098	0.0368098	0.0613497	0.0858896	0.0490798	0.0674847	0.00613497	0.0306748	0.9918	1.0029	1.0302	0.5397	6.1013	0.0214	1.8438	0.1411	1.0014	3.2904	0.1668	0.6641	2190	0.259361	0.247489	0.239726	0.253425	0.499087	0.487215	0.0579909	0.0415525	0.0712329	0.0712329
NP001410_NM001080513	1994	ELAVL1	HUR	NP001410.2	326	36090	0.0705521	0.00920245	0.0490798	0.0460123	0.0552147	0.0889571	0.0245399	0.0582822	0.0552147	0.0674847	0.0306748	0.0705521	0.0368098	0.0368098	0.0613497	0.0858896	0.0490798	0.0674847	0.00613497	0.0306748	0.9918	1.0029	1.0302	0.5397	6.1013	0.0214	1.8438	0.1411	1.0014	3.2904	0.1668	0.6641	1638	0.186203	0.348596	0.260073	0.205128	0.446276	0.608669	0.031746	0.0641026	0.0659341	0.019536
NP001410_NM003909	1994	ELAVL1	HUR	NP001410.2	326	36090	0.0705521	0.00920245	0.0490798	0.0460123	0.0552147	0.0889571	0.0245399	0.0582822	0.0552147	0.0674847	0.0306748	0.0705521	0.0368098	0.0368098	0.0613497	0.0858896	0.0490798	0.0674847	0.00613497	0.0306748	0.9918	1.0029	1.0302	0.5397	6.1013	0.0214	1.8438	0.1411	1.0014	3.2904	0.1668	0.6641	1614	0.295539	0.198885	0.229864	0.275713	0.525403	0.428748	0.0731103	0.0520446	0.0693928	0.0780669
NP001410_NM015986	1994	ELAVL1	HUR	NP001410.2	326	36090	0.0705521	0.00920245	0.0490798	0.0460123	0.0552147	0.0889571	0.0245399	0.0582822	0.0552147	0.0674847	0.0306748	0.0705521	0.0368098	0.0368098	0.0613497	0.0858896	0.0490798	0.0674847	0.00613497	0.0306748	0.9918	1.0029	1.0302	0.5397	6.1013	0.0214	1.8438	0.1411	1.0014	3.2904	0.1668	0.6641	1329	0.281415	0.193378	0.272385	0.252822	0.5538	0.465764	0.0504138	0.0579383	0.0940557	0.0601956
NP001410_NM001145426	1994	ELAVL1	HUR	NP001410.2	326	36090	0.0705521	0.00920245	0.0490798	0.0460123	0.0552147	0.0889571	0.0245399	0.0582822	0.0552147	0.0674847	0.0306748	0.0705521	0.0368098	0.0368098	0.0613497	0.0858896	0.0490798	0.0674847	0.00613497	0.0306748	0.9918	1.0029	1.0302	0.5397	6.1013	0.0214	1.8438	0.1411	1.0014	3.2904	0.1668	0.6641	912	0.246711	0.308114	0.297149	0.148026	0.54386	0.605263	0.0515351	0.0570175	0.0833333	0.0361842
NP001410_NM000758	1994	ELAVL1	HUR	NP001410.2	326	36090	0.0705521	0.00920245	0.0490798	0.0460123	0.0552147	0.0889571	0.0245399	0.0582822	0.0552147	0.0674847	0.0306748	0.0705521	0.0368098	0.0368098	0.0613497	0.0858896	0.0490798	0.0674847	0.00613497	0.0306748	0.9918	1.0029	1.0302	0.5397	6.1013	0.0214	1.8438	0.1411	1.0014	3.2904	0.1668	0.6641	435	0.227586	0.321839	0.25977	0.190805	0.487356	0.581609	0.0390805	0.0551724	0.0873563	0.0321839
NP001410_NM001127190	1994	ELAVL1	HUR	NP001410.2	326	36090	0.0705521	0.00920245	0.0490798	0.0460123	0.0552147	0.0889571	0.0245399	0.0582822	0.0552147	0.0674847	0.0306748	0.0705521	0.0368098	0.0368098	0.0613497	0.0858896	0.0490798	0.0674847	0.00613497	0.0306748	0.9918	1.0029	1.0302	0.5397	6.1013	0.0214	1.8438	0.1411	1.0014	3.2904	0.1668	0.6641	1353	0.232816	0.285292	0.30303	0.178862	0.535846	0.588322	0.045085	0.0643016	0.0805617	0.0339985
NP001410_NM145203	1994	ELAVL1	HUR	NP001410.2	326	36090	0.0705521	0.00920245	0.0490798	0.0460123	0.0552147	0.0889571	0.0245399	0.0582822	0.0552147	0.0674847	0.0306748	0.0705521	0.0368098	0.0368098	0.0613497	0.0858896	0.0490798	0.0674847	0.00613497	0.0306748	0.9918	1.0029	1.0302	0.5397	6.1013	0.0214	1.8438	0.1411	1.0014	3.2904	0.1668	0.6641	1014	0.312623	0.223866	0.2357	0.227811	0.548323	0.459566	0.0729783	0.0710059	0.0779093	0.0631164
NP001410_NM001893	1994	ELAVL1	HUR	NP001410.2	326	36090	0.0705521	0.00920245	0.0490798	0.0460123	0.0552147	0.0889571	0.0245399	0.0582822	0.0552147	0.0674847	0.0306748	0.0705521	0.0368098	0.0368098	0.0613497	0.0858896	0.0490798	0.0674847	0.00613497	0.0306748	0.9918	1.0029	1.0302	0.5397	6.1013	0.0214	1.8438	0.1411	1.0014	3.2904	0.1668	0.6641	1248	0.233974	0.305288	0.271635	0.189103	0.505609	0.576923	0.0472756	0.0689103	0.0616987	0.0448718
NP001410_NM001894	1994	ELAVL1	HUR	NP001410.2	326	36090	0.0705521	0.00920245	0.0490798	0.0460123	0.0552147	0.0889571	0.0245399	0.0582822	0.0552147	0.0674847	0.0306748	0.0705521	0.0368098	0.0368098	0.0613497	0.0858896	0.0490798	0.0674847	0.00613497	0.0306748	0.9918	1.0029	1.0302	0.5397	6.1013	0.0214	1.8438	0.1411	1.0014	3.2904	0.1668	0.6641	1251	0.222222	0.317346	0.28697	0.173461	0.509193	0.604317	0.0447642	0.0655476	0.0671463	0.0383693
NP001410_NM015235	1994	ELAVL1	HUR	NP001410.2	326	36090	0.0705521	0.00920245	0.0490798	0.0460123	0.0552147	0.0889571	0.0245399	0.0582822	0.0552147	0.0674847	0.0306748	0.0705521	0.0368098	0.0368098	0.0613497	0.0858896	0.0490798	0.0674847	0.00613497	0.0306748	0.9918	1.0029	1.0302	0.5397	6.1013	0.0214	1.8438	0.1411	1.0014	3.2904	0.1668	0.6641	1851	0.252836	0.240951	0.300378	0.205835	0.553214	0.541329	0.0421394	0.0399784	0.101567	0.0594273
NP001410_NM001328	1994	ELAVL1	HUR	NP001410.2	326	36090	0.0705521	0.00920245	0.0490798	0.0460123	0.0552147	0.0889571	0.0245399	0.0582822	0.0552147	0.0674847	0.0306748	0.0705521	0.0368098	0.0368098	0.0613497	0.0858896	0.0490798	0.0674847	0.00613497	0.0306748	0.9918	1.0029	1.0302	0.5397	6.1013	0.0214	1.8438	0.1411	1.0014	3.2904	0.1668	0.6641	1323	0.186697	0.333333	0.316704	0.163265	0.503401	0.650038	0.0249433	0.0612245	0.0634921	0.0355253
NP001410_NM004388	1994	ELAVL1	HUR	NP001410.2	326	36090	0.0705521	0.00920245	0.0490798	0.0460123	0.0552147	0.0889571	0.0245399	0.0582822	0.0552147	0.0674847	0.0306748	0.0705521	0.0368098	0.0368098	0.0613497	0.0858896	0.0490798	0.0674847	0.00613497	0.0306748	0.9918	1.0029	1.0302	0.5397	6.1013	0.0214	1.8438	0.1411	1.0014	3.2904	0.1668	0.6641	1158	0.285838	0.212435	0.228843	0.272884	0.51468	0.441278	0.0630397	0.0466321	0.060449	0.0889465
NP001410_NM016396	1994	ELAVL1	HUR	NP001410.2	326	36090	0.0705521	0.00920245	0.0490798	0.0460123	0.0552147	0.0889571	0.0245399	0.0582822	0.0552147	0.0674847	0.0306748	0.0705521	0.0368098	0.0368098	0.0613497	0.0858896	0.0490798	0.0674847	0.00613497	0.0306748	0.9918	1.0029	1.0302	0.5397	6.1013	0.0214	1.8438	0.1411	1.0014	3.2904	0.1668	0.6641	1401	0.356888	0.197716	0.196288	0.249108	0.553176	0.394004	0.0949322	0.0663812	0.0842256	0.0756602
NP001410_NM003478	1994	ELAVL1	HUR	NP001410.2	326	36090	0.0705521	0.00920245	0.0490798	0.0460123	0.0552147	0.0889571	0.0245399	0.0582822	0.0552147	0.0674847	0.0306748	0.0705521	0.0368098	0.0368098	0.0613497	0.0858896	0.0490798	0.0674847	0.00613497	0.0306748	0.9918	1.0029	1.0302	0.5397	6.1013	0.0214	1.8438	0.1411	1.0014	3.2904	0.1668	0.6641	2343	0.360649	0.158344	0.206146	0.274861	0.566795	0.36449	0.101579	0.05207	0.082373	0.084507
NP001410_NM001338	1994	ELAVL1	HUR	NP001410.2	326	36090	0.0705521	0.00920245	0.0490798	0.0460123	0.0552147	0.0889571	0.0245399	0.0582822	0.0552147	0.0674847	0.0306748	0.0705521	0.0368098	0.0368098	0.0613497	0.0858896	0.0490798	0.0674847	0.00613497	0.0306748	0.9918	1.0029	1.0302	0.5397	6.1013	0.0214	1.8438	0.1411	1.0014	3.2904	0.1668	0.6641	1098	0.300546	0.20765	0.225865	0.265938	0.526412	0.433515	0.0710383	0.0446266	0.0765027	0.079235
NP001410_NM003467	1994	ELAVL1	HUR	NP001410.2	326	36090	0.0705521	0.00920245	0.0490798	0.0460123	0.0552147	0.0889571	0.0245399	0.0582822	0.0552147	0.0674847	0.0306748	0.0705521	0.0368098	0.0368098	0.0613497	0.0858896	0.0490798	0.0674847	0.00613497	0.0306748	0.9918	1.0029	1.0302	0.5397	6.1013	0.0214	1.8438	0.1411	1.0014	3.2904	0.1668	0.6641	1059	0.230406	0.28423	0.219075	0.266289	0.449481	0.503305	0.0443815	0.0566572	0.0585458	0.0594901
NP001410_NM030579	1994	ELAVL1	HUR	NP001410.2	326	36090	0.0705521	0.00920245	0.0490798	0.0460123	0.0552147	0.0889571	0.0245399	0.0582822	0.0552147	0.0674847	0.0306748	0.0705521	0.0368098	0.0368098	0.0613497	0.0858896	0.0490798	0.0674847	0.00613497	0.0306748	0.9918	1.0029	1.0302	0.5397	6.1013	0.0214	1.8438	0.1411	1.0014	3.2904	0.1668	0.6641	453	0.275938	0.222958	0.271523	0.229581	0.547461	0.494481	0.0596026	0.0529801	0.0794702	0.0551876
NP001410_NM032576	1994	ELAVL1	HUR	NP001410.2	326	36090	0.0705521	0.00920245	0.0490798	0.0460123	0.0552147	0.0889571	0.0245399	0.0582822	0.0552147	0.0674847	0.0306748	0.0705521	0.0368098	0.0368098	0.0613497	0.0858896	0.0490798	0.0674847	0.00613497	0.0306748	0.9918	1.0029	1.0302	0.5397	6.1013	0.0214	1.8438	0.1411	1.0014	3.2904	0.1668	0.6641	546	0.379121	0.179487	0.210623	0.230769	0.589744	0.39011	0.120879	0.047619	0.0824176	0.0714286
NP001410_NM018959	1994	ELAVL1	HUR	NP001410.2	326	36090	0.0705521	0.00920245	0.0490798	0.0460123	0.0552147	0.0889571	0.0245399	0.0582822	0.0552147	0.0674847	0.0306748	0.0705521	0.0368098	0.0368098	0.0613497	0.0858896	0.0490798	0.0674847	0.00613497	0.0306748	0.9918	1.0029	1.0302	0.5397	6.1013	0.0214	1.8438	0.1411	1.0014	3.2904	0.1668	0.6641	1224	0.22549	0.308824	0.291667	0.17402	0.517157	0.60049	0.0400327	0.0596405	0.0808824	0.0351307
NP001410_NM001128631	1994	ELAVL1	HUR	NP001410.2	326	36090	0.0705521	0.00920245	0.0490798	0.0460123	0.0552147	0.0889571	0.0245399	0.0582822	0.0552147	0.0674847	0.0306748	0.0705521	0.0368098	0.0368098	0.0613497	0.0858896	0.0490798	0.0674847	0.00613497	0.0306748	0.9918	1.0029	1.0302	0.5397	6.1013	0.0214	1.8438	0.1411	1.0014	3.2904	0.1668	0.6641	696	0.206897	0.308908	0.291667	0.192529	0.498563	0.600575	0.0287356	0.0675287	0.0689655	0.0387931
NP001410_NM000788	1994	ELAVL1	HUR	NP001410.2	326	36090	0.0705521	0.00920245	0.0490798	0.0460123	0.0552147	0.0889571	0.0245399	0.0582822	0.0552147	0.0674847	0.0306748	0.0705521	0.0368098	0.0368098	0.0613497	0.0858896	0.0490798	0.0674847	0.00613497	0.0306748	0.9918	1.0029	1.0302	0.5397	6.1013	0.0214	1.8438	0.1411	1.0014	3.2904	0.1668	0.6641	783	0.319285	0.182631	0.220945	0.277139	0.54023	0.403576	0.0881226	0.0446999	0.0715198	0.0893997
NP001410_NM020640	1994	ELAVL1	HUR	NP001410.2	326	36090	0.0705521	0.00920245	0.0490798	0.0460123	0.0552147	0.0889571	0.0245399	0.0582822	0.0552147	0.0674847	0.0306748	0.0705521	0.0368098	0.0368098	0.0613497	0.0858896	0.0490798	0.0674847	0.00613497	0.0306748	0.9918	1.0029	1.0302	0.5397	6.1013	0.0214	1.8438	0.1411	1.0014	3.2904	0.1668	0.6641	780	0.35641	0.158974	0.215385	0.269231	0.571795	0.374359	0.0897436	0.0576923	0.0884615	0.0884615
NP001410_NM001098505	1994	ELAVL1	HUR	NP001410.2	326	36090	0.0705521	0.00920245	0.0490798	0.0460123	0.0552147	0.0889571	0.0245399	0.0582822	0.0552147	0.0674847	0.0306748	0.0705521	0.0368098	0.0368098	0.0613497	0.0858896	0.0490798	0.0674847	0.00613497	0.0306748	0.9918	1.0029	1.0302	0.5397	6.1013	0.0214	1.8438	0.1411	1.0014	3.2904	0.1668	0.6641	546	0.247253	0.260073	0.278388	0.214286	0.525641	0.538462	0.0384615	0.0567766	0.0897436	0.0549451
NP001410_NM005848	1994	ELAVL1	HUR	NP001410.2	326	36090	0.0705521	0.00920245	0.0490798	0.0460123	0.0552147	0.0889571	0.0245399	0.0582822	0.0552147	0.0674847	0.0306748	0.0705521	0.0368098	0.0368098	0.0613497	0.0858896	0.0490798	0.0674847	0.00613497	0.0306748	0.9918	1.0029	1.0302	0.5397	6.1013	0.0214	1.8438	0.1411	1.0014	3.2904	0.1668	0.6641	5592	0.318848	0.197425	0.19975	0.283977	0.518598	0.397175	0.0776109	0.0543634	0.0761803	0.0817239
NP001410_NM181872	1994	ELAVL1	HUR	NP001410.2	326	36090	0.0705521	0.00920245	0.0490798	0.0460123	0.0552147	0.0889571	0.0245399	0.0582822	0.0552147	0.0674847	0.0306748	0.0705521	0.0368098	0.0368098	0.0613497	0.0858896	0.0490798	0.0674847	0.00613497	0.0306748	0.9918	1.0029	1.0302	0.5397	6.1013	0.0214	1.8438	0.1411	1.0014	3.2904	0.1668	0.6641	1686	0.240807	0.288256	0.282325	0.188612	0.523132	0.570581	0.0504152	0.0563464	0.084223	0.0367734
NP001410_NM005880	1994	ELAVL1	HUR	NP001410.2	326	36090	0.0705521	0.00920245	0.0490798	0.0460123	0.0552147	0.0889571	0.0245399	0.0582822	0.0552147	0.0674847	0.0306748	0.0705521	0.0368098	0.0368098	0.0613497	0.0858896	0.0490798	0.0674847	0.00613497	0.0306748	0.9918	1.0029	1.0302	0.5397	6.1013	0.0214	1.8438	0.1411	1.0014	3.2904	0.1668	0.6641	1239	0.315577	0.176755	0.27845	0.229217	0.594027	0.455206	0.0750605	0.0427764	0.102502	0.0718321
NP001410_NM016306	1994	ELAVL1	HUR	NP001410.2	326	36090	0.0705521	0.00920245	0.0490798	0.0460123	0.0552147	0.0889571	0.0245399	0.0582822	0.0552147	0.0674847	0.0306748	0.0705521	0.0368098	0.0368098	0.0613497	0.0858896	0.0490798	0.0674847	0.00613497	0.0306748	0.9918	1.0029	1.0302	0.5397	6.1013	0.0214	1.8438	0.1411	1.0014	3.2904	0.1668	0.6641	1077	0.300836	0.191272	0.272981	0.234912	0.573816	0.464253	0.0696379	0.0501393	0.0891365	0.0696379
NP001410_NM175630	1994	ELAVL1	HUR	NP001410.2	326	36090	0.0705521	0.00920245	0.0490798	0.0460123	0.0552147	0.0889571	0.0245399	0.0582822	0.0552147	0.0674847	0.0306748	0.0705521	0.0368098	0.0368098	0.0613497	0.0858896	0.0490798	0.0674847	0.00613497	0.0306748	0.9918	1.0029	1.0302	0.5397	6.1013	0.0214	1.8438	0.1411	1.0014	3.2904	0.1668	0.6641	501	0.227545	0.305389	0.371257	0.0958084	0.598802	0.676647	0.0359281	0.0379242	0.125749	0.0179641
NP001410_NM015283	1994	ELAVL1	HUR	NP001410.2	326	36090	0.0705521	0.00920245	0.0490798	0.0460123	0.0552147	0.0889571	0.0245399	0.0582822	0.0552147	0.0674847	0.0306748	0.0705521	0.0368098	0.0368098	0.0613497	0.0858896	0.0490798	0.0674847	0.00613497	0.0306748	0.9918	1.0029	1.0302	0.5397	6.1013	0.0214	1.8438	0.1411	1.0014	3.2904	0.1668	0.6641	2028	0.281558	0.184418	0.211538	0.322485	0.493097	0.395957	0.061144	0.0502959	0.0586785	0.0907298
NP001410_NM001938	1994	ELAVL1	HUR	NP001410.2	326	36090	0.0705521	0.00920245	0.0490798	0.0460123	0.0552147	0.0889571	0.0245399	0.0582822	0.0552147	0.0674847	0.0306748	0.0705521	0.0368098	0.0368098	0.0613497	0.0858896	0.0490798	0.0674847	0.00613497	0.0306748	0.9918	1.0029	1.0302	0.5397	6.1013	0.0214	1.8438	0.1411	1.0014	3.2904	0.1668	0.6641	531	0.327684	0.212806	0.225989	0.233522	0.553672	0.438795	0.094162	0.039548	0.0922787	0.0753296
NP001410_NM003584	1994	ELAVL1	HUR	NP001410.2	326	36090	0.0705521	0.00920245	0.0490798	0.0460123	0.0552147	0.0889571	0.0245399	0.0582822	0.0552147	0.0674847	0.0306748	0.0705521	0.0368098	0.0368098	0.0613497	0.0858896	0.0490798	0.0674847	0.00613497	0.0306748	0.9918	1.0029	1.0302	0.5397	6.1013	0.0214	1.8438	0.1411	1.0014	3.2904	0.1668	0.6641	1134	0.286596	0.22575	0.231041	0.256614	0.517637	0.45679	0.0643739	0.0564374	0.0731922	0.0687831
NP001410_NM004419	1994	ELAVL1	HUR	NP001410.2	326	36090	0.0705521	0.00920245	0.0490798	0.0460123	0.0552147	0.0889571	0.0245399	0.0582822	0.0552147	0.0674847	0.0306748	0.0705521	0.0368098	0.0368098	0.0613497	0.0858896	0.0490798	0.0674847	0.00613497	0.0306748	0.9918	1.0029	1.0302	0.5397	6.1013	0.0214	1.8438	0.1411	1.0014	3.2904	0.1668	0.6641	1155	0.199134	0.322078	0.290043	0.188745	0.489177	0.612121	0.0363636	0.0545455	0.0683983	0.0329004
NP001410_NM001949	1994	ELAVL1	HUR	NP001410.2	326	36090	0.0705521	0.00920245	0.0490798	0.0460123	0.0552147	0.0889571	0.0245399	0.0582822	0.0552147	0.0674847	0.0306748	0.0705521	0.0368098	0.0368098	0.0613497	0.0858896	0.0490798	0.0674847	0.00613497	0.0306748	0.9918	1.0029	1.0302	0.5397	6.1013	0.0214	1.8438	0.1411	1.0014	3.2904	0.1668	0.6641	1398	0.270386	0.291845	0.252504	0.185265	0.52289	0.544349	0.0658083	0.0550787	0.0822604	0.0400572
NP001410_NM014674	1994	ELAVL1	HUR	NP001410.2	326	36090	0.0705521	0.00920245	0.0490798	0.0460123	0.0552147	0.0889571	0.0245399	0.0582822	0.0552147	0.0674847	0.0306748	0.0705521	0.0368098	0.0368098	0.0613497	0.0858896	0.0490798	0.0674847	0.00613497	0.0306748	0.9918	1.0029	1.0302	0.5397	6.1013	0.0214	1.8438	0.1411	1.0014	3.2904	0.1668	0.6641	1974	0.236575	0.264438	0.276089	0.222898	0.512665	0.540527	0.0466059	0.0567376	0.0658561	0.0567376
NP001410_NM025191	1994	ELAVL1	HUR	NP001410.2	326	36090	0.0705521	0.00920245	0.0490798	0.0460123	0.0552147	0.0889571	0.0245399	0.0582822	0.0552147	0.0674847	0.0306748	0.0705521	0.0368098	0.0368098	0.0613497	0.0858896	0.0490798	0.0674847	0.00613497	0.0306748	0.9918	1.0029	1.0302	0.5397	6.1013	0.0214	1.8438	0.1411	1.0014	3.2904	0.1668	0.6641	2799	0.30761	0.189711	0.237228	0.265452	0.544837	0.426938	0.0696677	0.0482315	0.0825295	0.0803859
NP001410_NM024329	1994	ELAVL1	HUR	NP001410.2	326	36090	0.0705521	0.00920245	0.0490798	0.0460123	0.0552147	0.0889571	0.0245399	0.0582822	0.0552147	0.0674847	0.0306748	0.0705521	0.0368098	0.0368098	0.0613497	0.0858896	0.0490798	0.0674847	0.00613497	0.0306748	0.9918	1.0029	1.0302	0.5397	6.1013	0.0214	1.8438	0.1411	1.0014	3.2904	0.1668	0.6641	723	0.224066	0.276625	0.363762	0.135546	0.587828	0.640387	0.0414938	0.0373444	0.109267	0.0276625
NP001410_NM022051	1994	ELAVL1	HUR	NP001410.2	326	36090	0.0705521	0.00920245	0.0490798	0.0460123	0.0552147	0.0889571	0.0245399	0.0582822	0.0552147	0.0674847	0.0306748	0.0705521	0.0368098	0.0368098	0.0613497	0.0858896	0.0490798	0.0674847	0.00613497	0.0306748	0.9918	1.0029	1.0302	0.5397	6.1013	0.0214	1.8438	0.1411	1.0014	3.2904	0.1668	0.6641	1281	0.233411	0.281811	0.326308	0.15847	0.559719	0.608119	0.0530835	0.0507416	0.0765027	0.0413739
NP001410_NM001964	1994	ELAVL1	HUR	NP001410.2	326	36090	0.0705521	0.00920245	0.0490798	0.0460123	0.0552147	0.0889571	0.0245399	0.0582822	0.0552147	0.0674847	0.0306748	0.0705521	0.0368098	0.0368098	0.0613497	0.0858896	0.0490798	0.0674847	0.00613497	0.0306748	0.9918	1.0029	1.0302	0.5397	6.1013	0.0214	1.8438	0.1411	1.0014	3.2904	0.1668	0.6641	1632	0.198529	0.397059	0.229167	0.175245	0.427696	0.626225	0.028799	0.067402	0.0716912	0.0251225
NP001410_NM004681	1994	ELAVL1	HUR	NP001410.2	326	36090	0.0705521	0.00920245	0.0490798	0.0460123	0.0552147	0.0889571	0.0245399	0.0582822	0.0552147	0.0674847	0.0306748	0.0705521	0.0368098	0.0368098	0.0613497	0.0858896	0.0490798	0.0674847	0.00613497	0.0306748	0.9918	1.0029	1.0302	0.5397	6.1013	0.0214	1.8438	0.1411	1.0014	3.2904	0.1668	0.6641	435	0.37931	0.110345	0.266667	0.243678	0.645977	0.377011	0.0965517	0.0344828	0.0873563	0.110345
NP001410_NM001164623	1994	ELAVL1	HUR	NP001410.2	326	36090	0.0705521	0.00920245	0.0490798	0.0460123	0.0552147	0.0889571	0.0245399	0.0582822	0.0552147	0.0674847	0.0306748	0.0705521	0.0368098	0.0368098	0.0613497	0.0858896	0.0490798	0.0674847	0.00613497	0.0306748	0.9918	1.0029	1.0302	0.5397	6.1013	0.0214	1.8438	0.1411	1.0014	3.2904	0.1668	0.6641	2478	0.241324	0.291768	0.276433	0.190476	0.517756	0.5682	0.0480226	0.0621469	0.074657	0.0451977
NP001410_NM004094	1994	ELAVL1	HUR	NP001410.2	326	36090	0.0705521	0.00920245	0.0490798	0.0460123	0.0552147	0.0889571	0.0245399	0.0582822	0.0552147	0.0674847	0.0306748	0.0705521	0.0368098	0.0368098	0.0613497	0.0858896	0.0490798	0.0674847	0.00613497	0.0306748	0.9918	1.0029	1.0302	0.5397	6.1013	0.0214	1.8438	0.1411	1.0014	3.2904	0.1668	0.6641	948	0.327004	0.160338	0.25211	0.260549	0.579114	0.412447	0.085443	0.0348101	0.0907173	0.0896624
NP001410_NM001415	1994	ELAVL1	HUR	NP001410.2	326	36090	0.0705521	0.00920245	0.0490798	0.0460123	0.0552147	0.0889571	0.0245399	0.0582822	0.0552147	0.0674847	0.0306748	0.0705521	0.0368098	0.0368098	0.0613497	0.0858896	0.0490798	0.0674847	0.00613497	0.0306748	0.9918	1.0029	1.0302	0.5397	6.1013	0.0214	1.8438	0.1411	1.0014	3.2904	0.1668	0.6641	1419	0.30303	0.188161	0.244538	0.264271	0.547569	0.432699	0.0718816	0.0486258	0.0873855	0.0697674
NP001410_NM001130678	1994	ELAVL1	HUR	NP001410.2	326	36090	0.0705521	0.00920245	0.0490798	0.0460123	0.0552147	0.0889571	0.0245399	0.0582822	0.0552147	0.0674847	0.0306748	0.0705521	0.0368098	0.0368098	0.0613497	0.0858896	0.0490798	0.0674847	0.00613497	0.0306748	0.9918	1.0029	1.0302	0.5397	6.1013	0.0214	1.8438	0.1411	1.0014	3.2904	0.1668	0.6641	714	0.306723	0.20028	0.245098	0.247899	0.551821	0.445378	0.070028	0.0742297	0.0742297	0.0616247
NP001410_NM004095	1994	ELAVL1	HUR	NP001410.2	326	36090	0.0705521	0.00920245	0.0490798	0.0460123	0.0552147	0.0889571	0.0245399	0.0582822	0.0552147	0.0674847	0.0306748	0.0705521	0.0368098	0.0368098	0.0613497	0.0858896	0.0490798	0.0674847	0.00613497	0.0306748	0.9918	1.0029	1.0302	0.5397	6.1013	0.0214	1.8438	0.1411	1.0014	3.2904	0.1668	0.6641	357	0.221289	0.344538	0.294118	0.140056	0.515406	0.638655	0.0336134	0.0616247	0.0756303	0.0420168
NP001410_NM004096	1994	ELAVL1	HUR	NP001410.2	326	36090	0.0705521	0.00920245	0.0490798	0.0460123	0.0552147	0.0889571	0.0245399	0.0582822	0.0552147	0.0674847	0.0306748	0.0705521	0.0368098	0.0368098	0.0613497	0.0858896	0.0490798	0.0674847	0.00613497	0.0306748	0.9918	1.0029	1.0302	0.5397	6.1013	0.0214	1.8438	0.1411	1.0014	3.2904	0.1668	0.6641	363	0.256198	0.330579	0.22865	0.184573	0.484848	0.559229	0.0440771	0.077135	0.0633609	0.0578512
NP001410_NM001143760	1994	ELAVL1	HUR	NP001410.2	326	36090	0.0705521	0.00920245	0.0490798	0.0460123	0.0552147	0.0889571	0.0245399	0.0582822	0.0552147	0.0674847	0.0306748	0.0705521	0.0368098	0.0368098	0.0613497	0.0858896	0.0490798	0.0674847	0.00613497	0.0306748	0.9918	1.0029	1.0302	0.5397	6.1013	0.0214	1.8438	0.1411	1.0014	3.2904	0.1668	0.6641	555	0.275676	0.230631	0.281081	0.212613	0.556757	0.511712	0.0612613	0.0540541	0.0828829	0.0648649
NP001410_NM001419	1994	ELAVL1	HUR	NP001410.2	326	36090	0.0705521	0.00920245	0.0490798	0.0460123	0.0552147	0.0889571	0.0245399	0.0582822	0.0552147	0.0674847	0.0306748	0.0705521	0.0368098	0.0368098	0.0613497	0.0858896	0.0490798	0.0674847	0.00613497	0.0306748	0.9918	1.0029	1.0302	0.5397	6.1013	0.0214	1.8438	0.1411	1.0014	3.2904	0.1668	0.6641	981	0.259939	0.266055	0.269113	0.204893	0.529052	0.535168	0.058104	0.0672783	0.069317	0.0479103
NP001410_NM001039459	1994	ELAVL1	HUR	NP001410.2	326	36090	0.0705521	0.00920245	0.0490798	0.0460123	0.0552147	0.0889571	0.0245399	0.0582822	0.0552147	0.0674847	0.0306748	0.0705521	0.0368098	0.0368098	0.0613497	0.0858896	0.0490798	0.0674847	0.00613497	0.0306748	0.9918	1.0029	1.0302	0.5397	6.1013	0.0214	1.8438	0.1411	1.0014	3.2904	0.1668	0.6641	744	0.290323	0.259409	0.252688	0.197581	0.543011	0.512097	0.0672043	0.0672043	0.0819892	0.0483871
NP001410_NM001974	1994	ELAVL1	HUR	NP001410.2	326	36090	0.0705521	0.00920245	0.0490798	0.0460123	0.0552147	0.0889571	0.0245399	0.0582822	0.0552147	0.0674847	0.0306748	0.0705521	0.0368098	0.0368098	0.0613497	0.0858896	0.0490798	0.0674847	0.00613497	0.0306748	0.9918	1.0029	1.0302	0.5397	6.1013	0.0214	1.8438	0.1411	1.0014	3.2904	0.1668	0.6641	2661	0.252537	0.251785	0.241638	0.25404	0.494175	0.493424	0.0563698	0.0544908	0.065389	0.0608794
NP001410_NM004454	1994	ELAVL1	HUR	NP001410.2	326	36090	0.0705521	0.00920245	0.0490798	0.0460123	0.0552147	0.0889571	0.0245399	0.0582822	0.0552147	0.0674847	0.0306748	0.0705521	0.0368098	0.0368098	0.0613497	0.0858896	0.0490798	0.0674847	0.00613497	0.0306748	0.9918	1.0029	1.0302	0.5397	6.1013	0.0214	1.8438	0.1411	1.0014	3.2904	0.1668	0.6641	1533	0.240705	0.305936	0.236791	0.216569	0.477495	0.542727	0.0443575	0.0521853	0.0802348	0.0534899
NP001410_NM001987	1994	ELAVL1	HUR	NP001410.2	326	36090	0.0705521	0.00920245	0.0490798	0.0460123	0.0552147	0.0889571	0.0245399	0.0582822	0.0552147	0.0674847	0.0306748	0.0705521	0.0368098	0.0368098	0.0613497	0.0858896	0.0490798	0.0674847	0.00613497	0.0306748	0.9918	1.0029	1.0302	0.5397	6.1013	0.0214	1.8438	0.1411	1.0014	3.2904	0.1668	0.6641	1359	0.265636	0.299485	0.232524	0.202355	0.49816	0.532009	0.0507726	0.0654893	0.0750552	0.0588668
NP001410_NM001444	1994	ELAVL1	HUR	NP001410.2	326	36090	0.0705521	0.00920245	0.0490798	0.0460123	0.0552147	0.0889571	0.0245399	0.0582822	0.0552147	0.0674847	0.0306748	0.0705521	0.0368098	0.0368098	0.0613497	0.0858896	0.0490798	0.0674847	0.00613497	0.0306748	0.9918	1.0029	1.0302	0.5397	6.1013	0.0214	1.8438	0.1411	1.0014	3.2904	0.1668	0.6641	408	0.348039	0.164216	0.272059	0.215686	0.620098	0.436275	0.0931373	0.0563725	0.0882353	0.0661765
NP001410_NM198847	1994	ELAVL1	HUR	NP001410.2	326	36090	0.0705521	0.00920245	0.0490798	0.0460123	0.0552147	0.0889571	0.0245399	0.0582822	0.0552147	0.0674847	0.0306748	0.0705521	0.0368098	0.0368098	0.0613497	0.0858896	0.0490798	0.0674847	0.00613497	0.0306748	0.9918	1.0029	1.0302	0.5397	6.1013	0.0214	1.8438	0.1411	1.0014	3.2904	0.1668	0.6641	1836	0.343682	0.174837	0.224946	0.256536	0.568627	0.399782	0.0931373	0.0511983	0.083878	0.0751634
NP001410_NM022760	1994	ELAVL1	HUR	NP001410.2	326	36090	0.0705521	0.00920245	0.0490798	0.0460123	0.0552147	0.0889571	0.0245399	0.0582822	0.0552147	0.0674847	0.0306748	0.0705521	0.0368098	0.0368098	0.0613497	0.0858896	0.0490798	0.0674847	0.00613497	0.0306748	0.9918	1.0029	1.0302	0.5397	6.1013	0.0214	1.8438	0.1411	1.0014	3.2904	0.1668	0.6641	1365	0.183883	0.32967	0.272527	0.213919	0.45641	0.602198	0.0227106	0.0630037	0.0578755	0.0380952
NP001410_NM152678	1994	ELAVL1	HUR	NP001410.2	326	36090	0.0705521	0.00920245	0.0490798	0.0460123	0.0552147	0.0889571	0.0245399	0.0582822	0.0552147	0.0674847	0.0306748	0.0705521	0.0368098	0.0368098	0.0613497	0.0858896	0.0490798	0.0674847	0.00613497	0.0306748	0.9918	1.0029	1.0302	0.5397	6.1013	0.0214	1.8438	0.1411	1.0014	3.2904	0.1668	0.6641	1827	0.281883	0.211275	0.235906	0.270936	0.517789	0.447181	0.0607553	0.0563766	0.0727969	0.0662288
NP001410_NM001170757	1994	ELAVL1	HUR	NP001410.2	326	36090	0.0705521	0.00920245	0.0490798	0.0460123	0.0552147	0.0889571	0.0245399	0.0582822	0.0552147	0.0674847	0.0306748	0.0705521	0.0368098	0.0368098	0.0613497	0.0858896	0.0490798	0.0674847	0.00613497	0.0306748	0.9918	1.0029	1.0302	0.5397	6.1013	0.0214	1.8438	0.1411	1.0014	3.2904	0.1668	0.6641	570	0.308772	0.221053	0.242105	0.22807	0.550877	0.463158	0.0684211	0.0421053	0.107018	0.0684211
NP001410_NM016623	1994	ELAVL1	HUR	NP001410.2	326	36090	0.0705521	0.00920245	0.0490798	0.0460123	0.0552147	0.0889571	0.0245399	0.0582822	0.0552147	0.0674847	0.0306748	0.0705521	0.0368098	0.0368098	0.0613497	0.0858896	0.0490798	0.0674847	0.00613497	0.0306748	0.9918	1.0029	1.0302	0.5397	6.1013	0.0214	1.8438	0.1411	1.0014	3.2904	0.1668	0.6641	975	0.34359	0.181538	0.218462	0.25641	0.562051	0.4	0.0882051	0.0492308	0.0902564	0.0841026
NP001410_NM001135812	1994	ELAVL1	HUR	NP001410.2	326	36090	0.0705521	0.00920245	0.0490798	0.0460123	0.0552147	0.0889571	0.0245399	0.0582822	0.0552147	0.0674847	0.0306748	0.0705521	0.0368098	0.0368098	0.0613497	0.0858896	0.0490798	0.0674847	0.00613497	0.0306748	0.9918	1.0029	1.0302	0.5397	6.1013	0.0214	1.8438	0.1411	1.0014	3.2904	0.1668	0.6641	666	0.309309	0.216216	0.232733	0.241742	0.542042	0.448949	0.0720721	0.0525526	0.0975976	0.0555556
NP001410_NM144664	1994	ELAVL1	HUR	NP001410.2	326	36090	0.0705521	0.00920245	0.0490798	0.0460123	0.0552147	0.0889571	0.0245399	0.0582822	0.0552147	0.0674847	0.0306748	0.0705521	0.0368098	0.0368098	0.0613497	0.0858896	0.0490798	0.0674847	0.00613497	0.0306748	0.9918	1.0029	1.0302	0.5397	6.1013	0.0214	1.8438	0.1411	1.0014	3.2904	0.1668	0.6641	1020	0.369608	0.208824	0.202941	0.218627	0.572549	0.411765	0.102941	0.0607843	0.0960784	0.0647059
NP001410_NM144963	1994	ELAVL1	HUR	NP001410.2	326	36090	0.0705521	0.00920245	0.0490798	0.0460123	0.0552147	0.0889571	0.0245399	0.0582822	0.0552147	0.0674847	0.0306748	0.0705521	0.0368098	0.0368098	0.0613497	0.0858896	0.0490798	0.0674847	0.00613497	0.0306748	0.9918	1.0029	1.0302	0.5397	6.1013	0.0214	1.8438	0.1411	1.0014	3.2904	0.1668	0.6641	2517	0.301947	0.205801	0.21176	0.280493	0.513707	0.417561	0.0659515	0.0560191	0.0746921	0.0818435
NP001410_NM033406	1994	ELAVL1	HUR	NP001410.2	326	36090	0.0705521	0.00920245	0.0490798	0.0460123	0.0552147	0.0889571	0.0245399	0.0582822	0.0552147	0.0674847	0.0306748	0.0705521	0.0368098	0.0368098	0.0613497	0.0858896	0.0490798	0.0674847	0.00613497	0.0306748	0.9918	1.0029	1.0302	0.5397	6.1013	0.0214	1.8438	0.1411	1.0014	3.2904	0.1668	0.6641	1248	0.282051	0.213141	0.22516	0.279647	0.507212	0.438301	0.0560897	0.0536859	0.0697115	0.0849359
NP001410_NM001080469	1994	ELAVL1	HUR	NP001410.2	326	36090	0.0705521	0.00920245	0.0490798	0.0460123	0.0552147	0.0889571	0.0245399	0.0582822	0.0552147	0.0674847	0.0306748	0.0705521	0.0368098	0.0368098	0.0613497	0.0858896	0.0490798	0.0674847	0.00613497	0.0306748	0.9918	1.0029	1.0302	0.5397	6.1013	0.0214	1.8438	0.1411	1.0014	3.2904	0.1668	0.6641	1812	0.167219	0.350442	0.331678	0.150662	0.498896	0.682119	0.0226269	0.053532	0.0695364	0.0198676
NP001410_NM002001	1994	ELAVL1	HUR	NP001410.2	326	36090	0.0705521	0.00920245	0.0490798	0.0460123	0.0552147	0.0889571	0.0245399	0.0582822	0.0552147	0.0674847	0.0306748	0.0705521	0.0368098	0.0368098	0.0613497	0.0858896	0.0490798	0.0674847	0.00613497	0.0306748	0.9918	1.0029	1.0302	0.5397	6.1013	0.0214	1.8438	0.1411	1.0014	3.2904	0.1668	0.6641	774	0.28553	0.222222	0.228682	0.263566	0.514212	0.450904	0.0723514	0.0607235	0.0749354	0.0594315
NP001410_NM002002	1994	ELAVL1	HUR	NP001410.2	326	36090	0.0705521	0.00920245	0.0490798	0.0460123	0.0552147	0.0889571	0.0245399	0.0582822	0.0552147	0.0674847	0.0306748	0.0705521	0.0368098	0.0368098	0.0613497	0.0858896	0.0490798	0.0674847	0.00613497	0.0306748	0.9918	1.0029	1.0302	0.5397	6.1013	0.0214	1.8438	0.1411	1.0014	3.2904	0.1668	0.6641	966	0.226708	0.274327	0.319876	0.179089	0.546584	0.594203	0.0445135	0.0621118	0.0828157	0.0289855
NP001410_NM014824	1994	ELAVL1	HUR	NP001410.2	326	36090	0.0705521	0.00920245	0.0490798	0.0460123	0.0552147	0.0889571	0.0245399	0.0582822	0.0552147	0.0674847	0.0306748	0.0705521	0.0368098	0.0368098	0.0613497	0.0858896	0.0490798	0.0674847	0.00613497	0.0306748	0.9918	1.0029	1.0302	0.5397	6.1013	0.0214	1.8438	0.1411	1.0014	3.2904	0.1668	0.6641	2223	0.321188	0.216824	0.237517	0.224471	0.558704	0.454341	0.0778228	0.0539811	0.0962663	0.0634278
NP001410_NM001171888	1994	ELAVL1	HUR	NP001410.2	326	36090	0.0705521	0.00920245	0.0490798	0.0460123	0.0552147	0.0889571	0.0245399	0.0582822	0.0552147	0.0674847	0.0306748	0.0705521	0.0368098	0.0368098	0.0613497	0.0858896	0.0490798	0.0674847	0.00613497	0.0306748	0.9918	1.0029	1.0302	0.5397	6.1013	0.0214	1.8438	0.1411	1.0014	3.2904	0.1668	0.6641	519	0.373796	0.196532	0.223507	0.206166	0.597303	0.420039	0.105973	0.0655106	0.0982659	0.0751445
NP001410_NM054014	1994	ELAVL1	HUR	NP001410.2	326	36090	0.0705521	0.00920245	0.0490798	0.0460123	0.0552147	0.0889571	0.0245399	0.0582822	0.0552147	0.0674847	0.0306748	0.0705521	0.0368098	0.0368098	0.0613497	0.0858896	0.0490798	0.0674847	0.00613497	0.0306748	0.9918	1.0029	1.0302	0.5397	6.1013	0.0214	1.8438	0.1411	1.0014	3.2904	0.1668	0.6641	327	0.256881	0.256881	0.287462	0.198777	0.544343	0.544343	0.0458716	0.0519878	0.0795107	0.058104
NP001410_NM004117	1994	ELAVL1	HUR	NP001410.2	326	36090	0.0705521	0.00920245	0.0490798	0.0460123	0.0552147	0.0889571	0.0245399	0.0582822	0.0552147	0.0674847	0.0306748	0.0705521	0.0368098	0.0368098	0.0613497	0.0858896	0.0490798	0.0674847	0.00613497	0.0306748	0.9918	1.0029	1.0302	0.5397	6.1013	0.0214	1.8438	0.1411	1.0014	3.2904	0.1668	0.6641	1374	0.336245	0.176128	0.275109	0.212518	0.611354	0.451237	0.0895197	0.0422125	0.100437	0.0713246
NP001410_NM001164638	1994	ELAVL1	HUR	NP001410.2	326	36090	0.0705521	0.00920245	0.0490798	0.0460123	0.0552147	0.0889571	0.0245399	0.0582822	0.0552147	0.0674847	0.0306748	0.0705521	0.0368098	0.0368098	0.0613497	0.0858896	0.0490798	0.0674847	0.00613497	0.0306748	0.9918	1.0029	1.0302	0.5397	6.1013	0.0214	1.8438	0.1411	1.0014	3.2904	0.1668	0.6641	795	0.187421	0.314465	0.342138	0.155975	0.52956	0.656604	0.0226415	0.0553459	0.0867925	0.0150943
NP001410_NM002024	1994	ELAVL1	HUR	NP001410.2	326	36090	0.0705521	0.00920245	0.0490798	0.0460123	0.0552147	0.0889571	0.0245399	0.0582822	0.0552147	0.0674847	0.0306748	0.0705521	0.0368098	0.0368098	0.0613497	0.0858896	0.0490798	0.0674847	0.00613497	0.0306748	0.9918	1.0029	1.0302	0.5397	6.1013	0.0214	1.8438	0.1411	1.0014	3.2904	0.1668	0.6641	1899	0.33228	0.176409	0.256977	0.234334	0.589258	0.433386	0.0832017	0.04792	0.0995261	0.0721432
NP001410_NM015033	1994	ELAVL1	HUR	NP001410.2	326	36090	0.0705521	0.00920245	0.0490798	0.0460123	0.0552147	0.0889571	0.0245399	0.0582822	0.0552147	0.0674847	0.0306748	0.0705521	0.0368098	0.0368098	0.0613497	0.0858896	0.0490798	0.0674847	0.00613497	0.0306748	0.9918	1.0029	1.0302	0.5397	6.1013	0.0214	1.8438	0.1411	1.0014	3.2904	0.1668	0.6641	1854	0.335491	0.225998	0.242718	0.195793	0.578209	0.468716	0.0803668	0.0533981	0.0992449	0.0668824
NP001410_NM001012505	1994	ELAVL1	HUR	NP001410.2	326	36090	0.0705521	0.00920245	0.0490798	0.0460123	0.0552147	0.0889571	0.0245399	0.0582822	0.0552147	0.0674847	0.0306748	0.0705521	0.0368098	0.0368098	0.0613497	0.0858896	0.0490798	0.0674847	0.00613497	0.0306748	0.9918	1.0029	1.0302	0.5397	6.1013	0.0214	1.8438	0.1411	1.0014	3.2904	0.1668	0.6641	345	0.24058	0.266667	0.304348	0.188406	0.544928	0.571014	0.0463768	0.0492754	0.0985507	0.0347826
NP001410_NM003902	1994	ELAVL1	HUR	NP001410.2	326	36090	0.0705521	0.00920245	0.0490798	0.0460123	0.0552147	0.0889571	0.0245399	0.0582822	0.0552147	0.0674847	0.0306748	0.0705521	0.0368098	0.0368098	0.0613497	0.0858896	0.0490798	0.0674847	0.00613497	0.0306748	0.9918	1.0029	1.0302	0.5397	6.1013	0.0214	1.8438	0.1411	1.0014	3.2904	0.1668	0.6641	1935	0.309561	0.227907	0.25478	0.207752	0.564341	0.482687	0.0728682	0.055814	0.0863049	0.0702842
NP001410_NM001013438	1994	ELAVL1	HUR	NP001410.2	326	36090	0.0705521	0.00920245	0.0490798	0.0460123	0.0552147	0.0889571	0.0245399	0.0582822	0.0552147	0.0674847	0.0306748	0.0705521	0.0368098	0.0368098	0.0613497	0.0858896	0.0490798	0.0674847	0.00613497	0.0306748	0.9918	1.0029	1.0302	0.5397	6.1013	0.0214	1.8438	0.1411	1.0014	3.2904	0.1668	0.6641	1620	0.324691	0.167901	0.258642	0.248765	0.583333	0.426543	0.0802469	0.0487654	0.091358	0.0765432
NP001410_NM199335	1994	ELAVL1	HUR	NP001410.2	326	36090	0.0705521	0.00920245	0.0490798	0.0460123	0.0552147	0.0889571	0.0245399	0.0582822	0.0552147	0.0674847	0.0306748	0.0705521	0.0368098	0.0368098	0.0613497	0.0858896	0.0490798	0.0674847	0.00613497	0.0306748	0.9918	1.0029	1.0302	0.5397	6.1013	0.0214	1.8438	0.1411	1.0014	3.2904	0.1668	0.6641	2352	0.349065	0.235119	0.222789	0.193027	0.571854	0.457908	0.0982143	0.057398	0.0948129	0.0569728
NP001410_NM001164616	1994	ELAVL1	HUR	NP001410.2	326	36090	0.0705521	0.00920245	0.0490798	0.0460123	0.0552147	0.0889571	0.0245399	0.0582822	0.0552147	0.0674847	0.0306748	0.0705521	0.0368098	0.0368098	0.0613497	0.0858896	0.0490798	0.0674847	0.00613497	0.0306748	0.9918	1.0029	1.0302	0.5397	6.1013	0.0214	1.8438	0.1411	1.0014	3.2904	0.1668	0.6641	2025	0.287901	0.2	0.225679	0.28642	0.51358	0.425679	0.0661728	0.0558025	0.0725926	0.0676543
NP001410_NM198395	1994	ELAVL1	HUR	NP001410.2	326	36090	0.0705521	0.00920245	0.0490798	0.0460123	0.0552147	0.0889571	0.0245399	0.0582822	0.0552147	0.0674847	0.0306748	0.0705521	0.0368098	0.0368098	0.0613497	0.0858896	0.0490798	0.0674847	0.00613497	0.0306748	0.9918	1.0029	1.0302	0.5397	6.1013	0.0214	1.8438	0.1411	1.0014	3.2904	0.1668	0.6641	1401	0.284797	0.220557	0.26838	0.226267	0.553176	0.488936	0.0613847	0.0549607	0.0920771	0.0556745
NP001410_NM012297	1994	ELAVL1	HUR	NP001410.2	326	36090	0.0705521	0.00920245	0.0490798	0.0460123	0.0552147	0.0889571	0.0245399	0.0582822	0.0552147	0.0674847	0.0306748	0.0705521	0.0368098	0.0368098	0.0613497	0.0858896	0.0490798	0.0674847	0.00613497	0.0306748	0.9918	1.0029	1.0302	0.5397	6.1013	0.0214	1.8438	0.1411	1.0014	3.2904	0.1668	0.6641	1449	0.301587	0.193927	0.254658	0.249827	0.556246	0.448585	0.0807453	0.0517598	0.0828157	0.0621118
NP001410_NM144618	1994	ELAVL1	HUR	NP001410.2	326	36090	0.0705521	0.00920245	0.0490798	0.0460123	0.0552147	0.0889571	0.0245399	0.0582822	0.0552147	0.0674847	0.0306748	0.0705521	0.0368098	0.0368098	0.0613497	0.0858896	0.0490798	0.0674847	0.00613497	0.0306748	0.9918	1.0029	1.0302	0.5397	6.1013	0.0214	1.8438	0.1411	1.0014	3.2904	0.1668	0.6641	1347	0.30438	0.230141	0.256125	0.209354	0.560505	0.486266	0.0660728	0.0586488	0.105419	0.0564217
NP001410_NM017660	1994	ELAVL1	HUR	NP001410.2	326	36090	0.0705521	0.00920245	0.0490798	0.0460123	0.0552147	0.0889571	0.0245399	0.0582822	0.0552147	0.0674847	0.0306748	0.0705521	0.0368098	0.0368098	0.0613497	0.0858896	0.0490798	0.0674847	0.00613497	0.0306748	0.9918	1.0029	1.0302	0.5397	6.1013	0.0214	1.8438	0.1411	1.0014	3.2904	0.1668	0.6641	1902	0.240273	0.322818	0.294427	0.142482	0.5347	0.617245	0.0462671	0.064143	0.0941115	0.0268139
NP001410_NM020699	1994	ELAVL1	HUR	NP001410.2	326	36090	0.0705521	0.00920245	0.0490798	0.0460123	0.0552147	0.0889571	0.0245399	0.0582822	0.0552147	0.0674847	0.0306748	0.0705521	0.0368098	0.0368098	0.0613497	0.0858896	0.0490798	0.0674847	0.00613497	0.0306748	0.9918	1.0029	1.0302	0.5397	6.1013	0.0214	1.8438	0.1411	1.0014	3.2904	0.1668	0.6641	1782	0.280584	0.268238	0.241302	0.209877	0.521886	0.50954	0.0594837	0.0583614	0.0875421	0.0549944
NP001410_NM000158	1994	ELAVL1	HUR	NP001410.2	326	36090	0.0705521	0.00920245	0.0490798	0.0460123	0.0552147	0.0889571	0.0245399	0.0582822	0.0552147	0.0674847	0.0306748	0.0705521	0.0368098	0.0368098	0.0613497	0.0858896	0.0490798	0.0674847	0.00613497	0.0306748	0.9918	1.0029	1.0302	0.5397	6.1013	0.0214	1.8438	0.1411	1.0014	3.2904	0.1668	0.6641	2109	0.282598	0.196302	0.239924	0.281176	0.522523	0.436226	0.0602181	0.0474158	0.0682788	0.0881935
NP001410_NM012198	1994	ELAVL1	HUR	NP001410.2	326	36090	0.0705521	0.00920245	0.0490798	0.0460123	0.0552147	0.0889571	0.0245399	0.0582822	0.0552147	0.0674847	0.0306748	0.0705521	0.0368098	0.0368098	0.0613497	0.0858896	0.0490798	0.0674847	0.00613497	0.0306748	0.9918	1.0029	1.0302	0.5397	6.1013	0.0214	1.8438	0.1411	1.0014	3.2904	0.1668	0.6641	654	0.282875	0.180428	0.252294	0.284404	0.535168	0.432722	0.0550459	0.0519878	0.0749235	0.0840979
NP001410_NM001024071	1994	ELAVL1	HUR	NP001410.2	326	36090	0.0705521	0.00920245	0.0490798	0.0460123	0.0552147	0.0889571	0.0245399	0.0582822	0.0552147	0.0674847	0.0306748	0.0705521	0.0368098	0.0368098	0.0613497	0.0858896	0.0490798	0.0674847	0.00613497	0.0306748	0.9918	1.0029	1.0302	0.5397	6.1013	0.0214	1.8438	0.1411	1.0014	3.2904	0.1668	0.6641	642	0.233645	0.272586	0.314642	0.179128	0.548287	0.587227	0.0498442	0.0373832	0.088785	0.0482866
NP001410_NM002056	1994	ELAVL1	HUR	NP001410.2	326	36090	0.0705521	0.00920245	0.0490798	0.0460123	0.0552147	0.0889571	0.0245399	0.0582822	0.0552147	0.0674847	0.0306748	0.0705521	0.0368098	0.0368098	0.0613497	0.0858896	0.0490798	0.0674847	0.00613497	0.0306748	0.9918	1.0029	1.0302	0.5397	6.1013	0.0214	1.8438	0.1411	1.0014	3.2904	0.1668	0.6641	2046	0.29521	0.192082	0.247801	0.264907	0.543011	0.439883	0.0650049	0.0557185	0.0782014	0.0752688
NP001410_NM024711	1994	ELAVL1	HUR	NP001410.2	326	36090	0.0705521	0.00920245	0.0490798	0.0460123	0.0552147	0.0889571	0.0245399	0.0582822	0.0552147	0.0674847	0.0306748	0.0705521	0.0368098	0.0368098	0.0613497	0.0858896	0.0490798	0.0674847	0.00613497	0.0306748	0.9918	1.0029	1.0302	0.5397	6.1013	0.0214	1.8438	0.1411	1.0014	3.2904	0.1668	0.6641	879	0.267349	0.253697	0.313993	0.16496	0.581342	0.567691	0.0591581	0.0568828	0.104664	0.0341297
NP001410_NM015554	1994	ELAVL1	HUR	NP001410.2	326	36090	0.0705521	0.00920245	0.0490798	0.0460123	0.0552147	0.0889571	0.0245399	0.0582822	0.0552147	0.0674847	0.0306748	0.0705521	0.0368098	0.0368098	0.0613497	0.0858896	0.0490798	0.0674847	0.00613497	0.0306748	0.9918	1.0029	1.0302	0.5397	6.1013	0.0214	1.8438	0.1411	1.0014	3.2904	0.1668	0.6641	1854	0.302589	0.203883	0.231931	0.261597	0.53452	0.435814	0.0738943	0.0533981	0.0803668	0.0701187
NP001410_NM147193	1994	ELAVL1	HUR	NP001410.2	326	36090	0.0705521	0.00920245	0.0490798	0.0460123	0.0552147	0.0889571	0.0245399	0.0582822	0.0552147	0.0674847	0.0306748	0.0705521	0.0368098	0.0368098	0.0613497	0.0858896	0.0490798	0.0674847	0.00613497	0.0306748	0.9918	1.0029	1.0302	0.5397	6.1013	0.0214	1.8438	0.1411	1.0014	3.2904	0.1668	0.6641	1863	0.17767	0.383253	0.276973	0.162104	0.454643	0.660225	0.0241546	0.0590446	0.0703167	0.0225443
NP001410_NM014905	1994	ELAVL1	HUR	NP001410.2	326	36090	0.0705521	0.00920245	0.0490798	0.0460123	0.0552147	0.0889571	0.0245399	0.0582822	0.0552147	0.0674847	0.0306748	0.0705521	0.0368098	0.0368098	0.0613497	0.0858896	0.0490798	0.0674847	0.00613497	0.0306748	0.9918	1.0029	1.0302	0.5397	6.1013	0.0214	1.8438	0.1411	1.0014	3.2904	0.1668	0.6641	2010	0.266169	0.204478	0.260697	0.268657	0.526866	0.465174	0.0646766	0.0447761	0.0626866	0.0691542
NP001410_NM178439	1994	ELAVL1	HUR	NP001410.2	326	36090	0.0705521	0.00920245	0.0490798	0.0460123	0.0552147	0.0889571	0.0245399	0.0582822	0.0552147	0.0674847	0.0306748	0.0705521	0.0368098	0.0368098	0.0613497	0.0858896	0.0490798	0.0674847	0.00613497	0.0306748	0.9918	1.0029	1.0302	0.5397	6.1013	0.0214	1.8438	0.1411	1.0014	3.2904	0.1668	0.6641	1548	0.29845	0.183463	0.247416	0.270672	0.545866	0.430879	0.0684755	0.0555556	0.0762274	0.0723514
NP001410_NM024482	1994	ELAVL1	HUR	NP001410.2	326	36090	0.0705521	0.00920245	0.0490798	0.0460123	0.0552147	0.0889571	0.0245399	0.0582822	0.0552147	0.0674847	0.0306748	0.0705521	0.0368098	0.0368098	0.0613497	0.0858896	0.0490798	0.0674847	0.00613497	0.0306748	0.9918	1.0029	1.0302	0.5397	6.1013	0.0214	1.8438	0.1411	1.0014	3.2904	0.1668	0.6641	1692	0.283688	0.23818	0.265366	0.212766	0.549054	0.503546	0.0567376	0.0573286	0.101655	0.0537825
NP001410_NM004124	1994	ELAVL1	HUR	NP001410.2	326	36090	0.0705521	0.00920245	0.0490798	0.0460123	0.0552147	0.0889571	0.0245399	0.0582822	0.0552147	0.0674847	0.0306748	0.0705521	0.0368098	0.0368098	0.0613497	0.0858896	0.0490798	0.0674847	0.00613497	0.0306748	0.9918	1.0029	1.0302	0.5397	6.1013	0.0214	1.8438	0.1411	1.0014	3.2904	0.1668	0.6641	429	0.32634	0.156177	0.230769	0.286713	0.55711	0.386946	0.0909091	0.0582751	0.0745921	0.0769231
NP001410_NM002072	1994	ELAVL1	HUR	NP001410.2	326	36090	0.0705521	0.00920245	0.0490798	0.0460123	0.0552147	0.0889571	0.0245399	0.0582822	0.0552147	0.0674847	0.0306748	0.0705521	0.0368098	0.0368098	0.0613497	0.0858896	0.0490798	0.0674847	0.00613497	0.0306748	0.9918	1.0029	1.0302	0.5397	6.1013	0.0214	1.8438	0.1411	1.0014	3.2904	0.1668	0.6641	1080	0.29537	0.233333	0.242593	0.228704	0.537963	0.475926	0.062963	0.0555556	0.087037	0.0777778
NP001410_NM004485	1994	ELAVL1	HUR	NP001410.2	326	36090	0.0705521	0.00920245	0.0490798	0.0460123	0.0552147	0.0889571	0.0245399	0.0582822	0.0552147	0.0674847	0.0306748	0.0705521	0.0368098	0.0368098	0.0613497	0.0858896	0.0490798	0.0674847	0.00613497	0.0306748	0.9918	1.0029	1.0302	0.5397	6.1013	0.0214	1.8438	0.1411	1.0014	3.2904	0.1668	0.6641	228	0.27193	0.267544	0.245614	0.214912	0.517544	0.513158	0.0657895	0.0394737	0.0964912	0.0482456
NP001410_NM019067	1994	ELAVL1	HUR	NP001410.2	326	36090	0.0705521	0.00920245	0.0490798	0.0460123	0.0552147	0.0889571	0.0245399	0.0582822	0.0552147	0.0674847	0.0306748	0.0705521	0.0368098	0.0368098	0.0613497	0.0858896	0.0490798	0.0674847	0.00613497	0.0306748	0.9918	1.0029	1.0302	0.5397	6.1013	0.0214	1.8438	0.1411	1.0014	3.2904	0.1668	0.6641	1749	0.273871	0.238994	0.28016	0.206975	0.554031	0.519154	0.0646083	0.0480274	0.086335	0.0554603
NP001410_NM022130	1994	ELAVL1	HUR	NP001410.2	326	36090	0.0705521	0.00920245	0.0490798	0.0460123	0.0552147	0.0889571	0.0245399	0.0582822	0.0552147	0.0674847	0.0306748	0.0705521	0.0368098	0.0368098	0.0613497	0.0858896	0.0490798	0.0674847	0.00613497	0.0306748	0.9918	1.0029	1.0302	0.5397	6.1013	0.0214	1.8438	0.1411	1.0014	3.2904	0.1668	0.6641	897	0.273133	0.238573	0.280936	0.207358	0.554069	0.519509	0.0668896	0.0657748	0.0735786	0.0512821
NP001410_NM016072	1994	ELAVL1	HUR	NP001410.2	326	36090	0.0705521	0.00920245	0.0490798	0.0460123	0.0552147	0.0889571	0.0245399	0.0582822	0.0552147	0.0674847	0.0306748	0.0705521	0.0368098	0.0368098	0.0613497	0.0858896	0.0490798	0.0674847	0.00613497	0.0306748	0.9918	1.0029	1.0302	0.5397	6.1013	0.0214	1.8438	0.1411	1.0014	3.2904	0.1668	0.6641	417	0.254197	0.148681	0.218225	0.378897	0.472422	0.366906	0.059952	0.028777	0.0527578	0.0815348
NP001410_NM021639	1994	ELAVL1	HUR	NP001410.2	326	36090	0.0705521	0.00920245	0.0490798	0.0460123	0.0552147	0.0889571	0.0245399	0.0582822	0.0552147	0.0674847	0.0306748	0.0705521	0.0368098	0.0368098	0.0613497	0.0858896	0.0490798	0.0674847	0.00613497	0.0306748	0.9918	1.0029	1.0302	0.5397	6.1013	0.0214	1.8438	0.1411	1.0014	3.2904	0.1668	0.6641	1425	0.282105	0.247018	0.249825	0.221053	0.53193	0.496842	0.0659649	0.0519298	0.0954386	0.0477193
NP001410_NM148903	1994	ELAVL1	HUR	NP001410.2	326	36090	0.0705521	0.00920245	0.0490798	0.0460123	0.0552147	0.0889571	0.0245399	0.0582822	0.0552147	0.0674847	0.0306748	0.0705521	0.0368098	0.0368098	0.0613497	0.0858896	0.0490798	0.0674847	0.00613497	0.0306748	0.9918	1.0029	1.0302	0.5397	6.1013	0.0214	1.8438	0.1411	1.0014	3.2904	0.1668	0.6641	1230	0.238211	0.282114	0.262602	0.217073	0.500813	0.544715	0.0585366	0.0479675	0.0739837	0.0390244
NP001410_NM152407	1994	ELAVL1	HUR	NP001410.2	326	36090	0.0705521	0.00920245	0.0490798	0.0460123	0.0552147	0.0889571	0.0245399	0.0582822	0.0552147	0.0674847	0.0306748	0.0705521	0.0368098	0.0368098	0.0613497	0.0858896	0.0490798	0.0674847	0.00613497	0.0306748	0.9918	1.0029	1.0302	0.5397	6.1013	0.0214	1.8438	0.1411	1.0014	3.2904	0.1668	0.6641	678	0.256637	0.216814	0.311209	0.215339	0.567847	0.528024	0.0560472	0.0471976	0.0958702	0.0412979
NP001410_NM001146156	1994	ELAVL1	HUR	NP001410.2	326	36090	0.0705521	0.00920245	0.0490798	0.0460123	0.0552147	0.0889571	0.0245399	0.0582822	0.0552147	0.0674847	0.0306748	0.0705521	0.0368098	0.0368098	0.0613497	0.0858896	0.0490798	0.0674847	0.00613497	0.0306748	0.9918	1.0029	1.0302	0.5397	6.1013	0.0214	1.8438	0.1411	1.0014	3.2904	0.1668	0.6641	1263	0.284244	0.23753	0.230404	0.247823	0.514648	0.467933	0.0593824	0.064133	0.077593	0.0649248
NP001410_NM000637	1994	ELAVL1	HUR	NP001410.2	326	36090	0.0705521	0.00920245	0.0490798	0.0460123	0.0552147	0.0889571	0.0245399	0.0582822	0.0552147	0.0674847	0.0306748	0.0705521	0.0368098	0.0368098	0.0613497	0.0858896	0.0490798	0.0674847	0.00613497	0.0306748	0.9918	1.0029	1.0302	0.5397	6.1013	0.0214	1.8438	0.1411	1.0014	3.2904	0.1668	0.6641	1569	0.246017	0.253665	0.282345	0.217973	0.528362	0.53601	0.0554493	0.0452518	0.0656469	0.0630975
NP001410_NM001516	1994	ELAVL1	HUR	NP001410.2	326	36090	0.0705521	0.00920245	0.0490798	0.0460123	0.0552147	0.0889571	0.0245399	0.0582822	0.0552147	0.0674847	0.0306748	0.0705521	0.0368098	0.0368098	0.0613497	0.0858896	0.0490798	0.0674847	0.00613497	0.0306748	0.9918	1.0029	1.0302	0.5397	6.1013	0.0214	1.8438	0.1411	1.0014	3.2904	0.1668	0.6641	927	0.29342	0.203883	0.217907	0.28479	0.511327	0.421791	0.0744337	0.0420712	0.0679612	0.0787487
NP001410_NM004893	1994	ELAVL1	HUR	NP001410.2	326	36090	0.0705521	0.00920245	0.0490798	0.0460123	0.0552147	0.0889571	0.0245399	0.0582822	0.0552147	0.0674847	0.0306748	0.0705521	0.0368098	0.0368098	0.0613497	0.0858896	0.0490798	0.0674847	0.00613497	0.0306748	0.9918	1.0029	1.0302	0.5397	6.1013	0.0214	1.8438	0.1411	1.0014	3.2904	0.1668	0.6641	1116	0.280466	0.252688	0.27957	0.187276	0.560036	0.532258	0.0716846	0.0483871	0.0958781	0.0430108
NP001410_NM005334	1994	ELAVL1	HUR	NP001410.2	326	36090	0.0705521	0.00920245	0.0490798	0.0460123	0.0552147	0.0889571	0.0245399	0.0582822	0.0552147	0.0674847	0.0306748	0.0705521	0.0368098	0.0368098	0.0613497	0.0858896	0.0490798	0.0674847	0.00613497	0.0306748	0.9918	1.0029	1.0302	0.5397	6.1013	0.0214	1.8438	0.1411	1.0014	3.2904	0.1668	0.6641	6108	0.209234	0.352489	0.277832	0.160445	0.487066	0.630321	0.0311067	0.0738376	0.0684348	0.0293058
NP001410_NM001527	1994	ELAVL1	HUR	NP001410.2	326	36090	0.0705521	0.00920245	0.0490798	0.0460123	0.0552147	0.0889571	0.0245399	0.0582822	0.0552147	0.0674847	0.0306748	0.0705521	0.0368098	0.0368098	0.0613497	0.0858896	0.0490798	0.0674847	0.00613497	0.0306748	0.9918	1.0029	1.0302	0.5397	6.1013	0.0214	1.8438	0.1411	1.0014	3.2904	0.1668	0.6641	1467	0.340832	0.159509	0.23381	0.265849	0.574642	0.39332	0.0777096	0.0477164	0.0845262	0.100204
NP001410_NM018063	1994	ELAVL1	HUR	NP001410.2	326	36090	0.0705521	0.00920245	0.0490798	0.0460123	0.0552147	0.0889571	0.0245399	0.0582822	0.0552147	0.0674847	0.0306748	0.0705521	0.0368098	0.0368098	0.0613497	0.0858896	0.0490798	0.0674847	0.00613497	0.0306748	0.9918	1.0029	1.0302	0.5397	6.1013	0.0214	1.8438	0.1411	1.0014	3.2904	0.1668	0.6641	2517	0.346047	0.159317	0.225268	0.269368	0.571315	0.384585	0.0929678	0.0437028	0.0854191	0.0862137
NP001410_NM014877	1994	ELAVL1	HUR	NP001410.2	326	36090	0.0705521	0.00920245	0.0490798	0.0460123	0.0552147	0.0889571	0.0245399	0.0582822	0.0552147	0.0674847	0.0306748	0.0705521	0.0368098	0.0368098	0.0613497	0.0858896	0.0490798	0.0674847	0.00613497	0.0306748	0.9918	1.0029	1.0302	0.5397	6.1013	0.0214	1.8438	0.1411	1.0014	3.2904	0.1668	0.6641	5829	0.297821	0.246526	0.208097	0.247555	0.505919	0.454623	0.0658775	0.0607308	0.0835478	0.0679362
NP001410_NM033055	1994	ELAVL1	HUR	NP001410.2	326	36090	0.0705521	0.00920245	0.0490798	0.0460123	0.0552147	0.0889571	0.0245399	0.0582822	0.0552147	0.0674847	0.0306748	0.0705521	0.0368098	0.0368098	0.0613497	0.0858896	0.0490798	0.0674847	0.00613497	0.0306748	0.9918	1.0029	1.0302	0.5397	6.1013	0.0214	1.8438	0.1411	1.0014	3.2904	0.1668	0.6641	1473	0.24983	0.220638	0.230821	0.29871	0.480652	0.45146	0.0515954	0.0495587	0.0665309	0.0685675
NP001410_NM032558	1994	ELAVL1	HUR	NP001410.2	326	36090	0.0705521	0.00920245	0.0490798	0.0460123	0.0552147	0.0889571	0.0245399	0.0582822	0.0552147	0.0674847	0.0306748	0.0705521	0.0368098	0.0368098	0.0613497	0.0858896	0.0490798	0.0674847	0.00613497	0.0306748	0.9918	1.0029	1.0302	0.5397	6.1013	0.0214	1.8438	0.1411	1.0014	3.2904	0.1668	0.6641	1521	0.214333	0.241289	0.266272	0.278107	0.480605	0.507561	0.0361604	0.0394477	0.0703485	0.0598291
NP001410_NM152696	1994	ELAVL1	HUR	NP001410.2	326	36090	0.0705521	0.00920245	0.0490798	0.0460123	0.0552147	0.0889571	0.0245399	0.0582822	0.0552147	0.0674847	0.0306748	0.0705521	0.0368098	0.0368098	0.0613497	0.0858896	0.0490798	0.0674847	0.00613497	0.0306748	0.9918	1.0029	1.0302	0.5397	6.1013	0.0214	1.8438	0.1411	1.0014	3.2904	0.1668	0.6641	3228	0.26518	0.262701	0.225217	0.246902	0.490397	0.487918	0.0539033	0.0622677	0.0802354	0.0560719
NP001410_NM018200	1994	ELAVL1	HUR	NP001410.2	326	36090	0.0705521	0.00920245	0.0490798	0.0460123	0.0552147	0.0889571	0.0245399	0.0582822	0.0552147	0.0674847	0.0306748	0.0705521	0.0368098	0.0368098	0.0613497	0.0858896	0.0490798	0.0674847	0.00613497	0.0306748	0.9918	1.0029	1.0302	0.5397	6.1013	0.0214	1.8438	0.1411	1.0014	3.2904	0.1668	0.6641	1044	0.32567	0.227969	0.255747	0.190613	0.581418	0.483716	0.0708812	0.0603448	0.114943	0.0565134
NP001410_NM001130689	1994	ELAVL1	HUR	NP001410.2	326	36090	0.0705521	0.00920245	0.0490798	0.0460123	0.0552147	0.0889571	0.0245399	0.0582822	0.0552147	0.0674847	0.0306748	0.0705521	0.0368098	0.0368098	0.0613497	0.0858896	0.0490798	0.0674847	0.00613497	0.0306748	0.9918	1.0029	1.0302	0.5397	6.1013	0.0214	1.8438	0.1411	1.0014	3.2904	0.1668	0.6641	630	0.365079	0.193651	0.27619	0.165079	0.64127	0.469841	0.114286	0.0380952	0.111111	0.0571429
NP001410_NM005517	1994	ELAVL1	HUR	NP001410.2	326	36090	0.0705521	0.00920245	0.0490798	0.0460123	0.0552147	0.0889571	0.0245399	0.0582822	0.0552147	0.0674847	0.0306748	0.0705521	0.0368098	0.0368098	0.0613497	0.0858896	0.0490798	0.0674847	0.00613497	0.0306748	0.9918	1.0029	1.0302	0.5397	6.1013	0.0214	1.8438	0.1411	1.0014	3.2904	0.1668	0.6641	273	0.377289	0.201465	0.311355	0.10989	0.688645	0.512821	0.117216	0.032967	0.135531	0.032967
NP001410_NM016287	1994	ELAVL1	HUR	NP001410.2	326	36090	0.0705521	0.00920245	0.0490798	0.0460123	0.0552147	0.0889571	0.0245399	0.0582822	0.0552147	0.0674847	0.0306748	0.0705521	0.0368098	0.0368098	0.0613497	0.0858896	0.0490798	0.0674847	0.00613497	0.0306748	0.9918	1.0029	1.0302	0.5397	6.1013	0.0214	1.8438	0.1411	1.0014	3.2904	0.1668	0.6641	1662	0.33213	0.223827	0.248496	0.195548	0.580626	0.472323	0.0938628	0.0409146	0.112515	0.0493381
NP001410_NM016142	1994	ELAVL1	HUR	NP001410.2	326	36090	0.0705521	0.00920245	0.0490798	0.0460123	0.0552147	0.0889571	0.0245399	0.0582822	0.0552147	0.0674847	0.0306748	0.0705521	0.0368098	0.0368098	0.0613497	0.0858896	0.0490798	0.0674847	0.00613497	0.0306748	0.9918	1.0029	1.0302	0.5397	6.1013	0.0214	1.8438	0.1411	1.0014	3.2904	0.1668	0.6641	939	0.27689	0.212993	0.246006	0.264111	0.522897	0.458999	0.0756124	0.0436635	0.0585729	0.0745474
NP001410_NM016097	1994	ELAVL1	HUR	NP001410.2	326	36090	0.0705521	0.00920245	0.0490798	0.0460123	0.0552147	0.0889571	0.0245399	0.0582822	0.0552147	0.0674847	0.0306748	0.0705521	0.0368098	0.0368098	0.0613497	0.0858896	0.0490798	0.0674847	0.00613497	0.0306748	0.9918	1.0029	1.0302	0.5397	6.1013	0.0214	1.8438	0.1411	1.0014	3.2904	0.1668	0.6641	249	0.273092	0.208835	0.253012	0.26506	0.526104	0.461847	0.064257	0.0522088	0.064257	0.0803213
NP001410_NM001144879	1994	ELAVL1	HUR	NP001410.2	326	36090	0.0705521	0.00920245	0.0490798	0.0460123	0.0552147	0.0889571	0.0245399	0.0582822	0.0552147	0.0674847	0.0306748	0.0705521	0.0368098	0.0368098	0.0613497	0.0858896	0.0490798	0.0674847	0.00613497	0.0306748	0.9918	1.0029	1.0302	0.5397	6.1013	0.0214	1.8438	0.1411	1.0014	3.2904	0.1668	0.6641	597	0.314908	0.157454	0.247906	0.279732	0.562814	0.40536	0.0938023	0.0435511	0.0670017	0.0753769
NP001410_NM017813	1994	ELAVL1	HUR	NP001410.2	326	36090	0.0705521	0.00920245	0.0490798	0.0460123	0.0552147	0.0889571	0.0245399	0.0582822	0.0552147	0.0674847	0.0306748	0.0705521	0.0368098	0.0368098	0.0613497	0.0858896	0.0490798	0.0674847	0.00613497	0.0306748	0.9918	1.0029	1.0302	0.5397	6.1013	0.0214	1.8438	0.1411	1.0014	3.2904	0.1668	0.6641	1080	0.246296	0.244444	0.287037	0.222222	0.533333	0.531481	0.0472222	0.0518519	0.0703704	0.0574074
NP001410_NM002199	1994	ELAVL1	HUR	NP001410.2	326	36090	0.0705521	0.00920245	0.0490798	0.0460123	0.0552147	0.0889571	0.0245399	0.0582822	0.0552147	0.0674847	0.0306748	0.0705521	0.0368098	0.0368098	0.0613497	0.0858896	0.0490798	0.0674847	0.00613497	0.0306748	0.9918	1.0029	1.0302	0.5397	6.1013	0.0214	1.8438	0.1411	1.0014	3.2904	0.1668	0.6641	1050	0.304762	0.254286	0.252381	0.188571	0.557143	0.506667	0.0733333	0.0514286	0.092381	0.06
NP001410_NM001077397	1994	ELAVL1	HUR	NP001410.2	326	36090	0.0705521	0.00920245	0.0490798	0.0460123	0.0552147	0.0889571	0.0245399	0.0582822	0.0552147	0.0674847	0.0306748	0.0705521	0.0368098	0.0368098	0.0613497	0.0858896	0.0490798	0.0674847	0.00613497	0.0306748	0.9918	1.0029	1.0302	0.5397	6.1013	0.0214	1.8438	0.1411	1.0014	3.2904	0.1668	0.6641	1716	0.184732	0.363054	0.314685	0.137529	0.499417	0.677739	0.0361305	0.0460373	0.0751748	0.0198135
NP001410_NM030940	1994	ELAVL1	HUR	NP001410.2	326	36090	0.0705521	0.00920245	0.0490798	0.0460123	0.0552147	0.0889571	0.0245399	0.0582822	0.0552147	0.0674847	0.0306748	0.0705521	0.0368098	0.0368098	0.0613497	0.0858896	0.0490798	0.0674847	0.00613497	0.0306748	0.9918	1.0029	1.0302	0.5397	6.1013	0.0214	1.8438	0.1411	1.0014	3.2904	0.1668	0.6641	390	0.330769	0.194872	0.235897	0.238462	0.566667	0.430769	0.0897436	0.0538462	0.0948718	0.0564103
NP001410_NM033666	1994	ELAVL1	HUR	NP001410.2	326	36090	0.0705521	0.00920245	0.0490798	0.0460123	0.0552147	0.0889571	0.0245399	0.0582822	0.0552147	0.0674847	0.0306748	0.0705521	0.0368098	0.0368098	0.0613497	0.0858896	0.0490798	0.0674847	0.00613497	0.0306748	0.9918	1.0029	1.0302	0.5397	6.1013	0.0214	1.8438	0.1411	1.0014	3.2904	0.1668	0.6641	2370	0.319831	0.171308	0.240928	0.267932	0.560759	0.412236	0.0860759	0.049789	0.0751055	0.078481
NP001410_NM001171581	1994	ELAVL1	HUR	NP001410.2	326	36090	0.0705521	0.00920245	0.0490798	0.0460123	0.0552147	0.0889571	0.0245399	0.0582822	0.0552147	0.0674847	0.0306748	0.0705521	0.0368098	0.0368098	0.0613497	0.0858896	0.0490798	0.0674847	0.00613497	0.0306748	0.9918	1.0029	1.0302	0.5397	6.1013	0.0214	1.8438	0.1411	1.0014	3.2904	0.1668	0.6641	660	0.257576	0.231818	0.240909	0.269697	0.498485	0.472727	0.0590909	0.0530303	0.0636364	0.0621212
NP001410_NM014876	1994	ELAVL1	HUR	NP001410.2	326	36090	0.0705521	0.00920245	0.0490798	0.0460123	0.0552147	0.0889571	0.0245399	0.0582822	0.0552147	0.0674847	0.0306748	0.0705521	0.0368098	0.0368098	0.0613497	0.0858896	0.0490798	0.0674847	0.00613497	0.0306748	0.9918	1.0029	1.0302	0.5397	6.1013	0.0214	1.8438	0.1411	1.0014	3.2904	0.1668	0.6641	609	0.272578	0.249589	0.272578	0.205255	0.545156	0.522167	0.0574713	0.0574713	0.0821018	0.0541872
NP001410_NM005354	1994	ELAVL1	HUR	NP001410.2	326	36090	0.0705521	0.00920245	0.0490798	0.0460123	0.0552147	0.0889571	0.0245399	0.0582822	0.0552147	0.0674847	0.0306748	0.0705521	0.0368098	0.0368098	0.0613497	0.0858896	0.0490798	0.0674847	0.00613497	0.0306748	0.9918	1.0029	1.0302	0.5397	6.1013	0.0214	1.8438	0.1411	1.0014	3.2904	0.1668	0.6641	1044	0.155172	0.386015	0.346743	0.112069	0.501916	0.732759	0.0268199	0.0431034	0.0699234	0.0114943
NP001410_NM001163677	1994	ELAVL1	HUR	NP001410.2	326	36090	0.0705521	0.00920245	0.0490798	0.0460123	0.0552147	0.0889571	0.0245399	0.0582822	0.0552147	0.0674847	0.0306748	0.0705521	0.0368098	0.0368098	0.0613497	0.0858896	0.0490798	0.0674847	0.00613497	0.0306748	0.9918	1.0029	1.0302	0.5397	6.1013	0.0214	1.8438	0.1411	1.0014	3.2904	0.1668	0.6641	522	0.268199	0.250958	0.262452	0.218391	0.530651	0.51341	0.0421456	0.0574713	0.0996169	0.0536398
NP001410_NM001100603	1994	ELAVL1	HUR	NP001410.2	326	36090	0.0705521	0.00920245	0.0490798	0.0460123	0.0552147	0.0889571	0.0245399	0.0582822	0.0552147	0.0674847	0.0306748	0.0705521	0.0368098	0.0368098	0.0613497	0.0858896	0.0490798	0.0674847	0.00613497	0.0306748	0.9918	1.0029	1.0302	0.5397	6.1013	0.0214	1.8438	0.1411	1.0014	3.2904	0.1668	0.6641	561	0.253119	0.240642	0.217469	0.28877	0.470588	0.458111	0.0552585	0.0534759	0.0623886	0.0606061
NP001410_NM003685	1994	ELAVL1	HUR	NP001410.2	326	36090	0.0705521	0.00920245	0.0490798	0.0460123	0.0552147	0.0889571	0.0245399	0.0582822	0.0552147	0.0674847	0.0306748	0.0705521	0.0368098	0.0368098	0.0613497	0.0858896	0.0490798	0.0674847	0.00613497	0.0306748	0.9918	1.0029	1.0302	0.5397	6.1013	0.0214	1.8438	0.1411	1.0014	3.2904	0.1668	0.6641	2136	0.220037	0.320225	0.319757	0.139981	0.539794	0.639981	0.0388577	0.0519663	0.082397	0.039794
NP001410_NM014734	1994	ELAVL1	HUR	NP001410.2	326	36090	0.0705521	0.00920245	0.0490798	0.0460123	0.0552147	0.0889571	0.0245399	0.0582822	0.0552147	0.0674847	0.0306748	0.0705521	0.0368098	0.0368098	0.0613497	0.0858896	0.0490798	0.0674847	0.00613497	0.0306748	0.9918	1.0029	1.0302	0.5397	6.1013	0.0214	1.8438	0.1411	1.0014	3.2904	0.1668	0.6641	912	0.225877	0.273026	0.289474	0.211623	0.515351	0.5625	0.0307018	0.058114	0.0811404	0.0449561
NP001410_NM014774	1994	ELAVL1	HUR	NP001410.2	326	36090	0.0705521	0.00920245	0.0490798	0.0460123	0.0552147	0.0889571	0.0245399	0.0582822	0.0552147	0.0674847	0.0306748	0.0705521	0.0368098	0.0368098	0.0613497	0.0858896	0.0490798	0.0674847	0.00613497	0.0306748	0.9918	1.0029	1.0302	0.5397	6.1013	0.0214	1.8438	0.1411	1.0014	3.2904	0.1668	0.6641	1488	0.318548	0.218414	0.236559	0.226478	0.555108	0.454973	0.0772849	0.0537634	0.102151	0.0571237
NP001410_NM020827	1994	ELAVL1	HUR	NP001410.2	326	36090	0.0705521	0.00920245	0.0490798	0.0460123	0.0552147	0.0889571	0.0245399	0.0582822	0.0552147	0.0674847	0.0306748	0.0705521	0.0368098	0.0368098	0.0613497	0.0858896	0.0490798	0.0674847	0.00613497	0.0306748	0.9918	1.0029	1.0302	0.5397	6.1013	0.0214	1.8438	0.1411	1.0014	3.2904	0.1668	0.6641	1599	0.363977	0.202001	0.198874	0.235147	0.562852	0.400876	0.0994371	0.0594121	0.0844278	0.0719199
NP001410_NM001145314	1994	ELAVL1	HUR	NP001410.2	326	36090	0.0705521	0.00920245	0.0490798	0.0460123	0.0552147	0.0889571	0.0245399	0.0582822	0.0552147	0.0674847	0.0306748	0.0705521	0.0368098	0.0368098	0.0613497	0.0858896	0.0490798	0.0674847	0.00613497	0.0306748	0.9918	1.0029	1.0302	0.5397	6.1013	0.0214	1.8438	0.1411	1.0014	3.2904	0.1668	0.6641	1200	0.3225	0.1775	0.210833	0.289167	0.533333	0.388333	0.0883333	0.0441667	0.0783333	0.0775
NP001410_NM001134870	1994	ELAVL1	HUR	NP001410.2	326	36090	0.0705521	0.00920245	0.0490798	0.0460123	0.0552147	0.0889571	0.0245399	0.0582822	0.0552147	0.0674847	0.0306748	0.0705521	0.0368098	0.0368098	0.0613497	0.0858896	0.0490798	0.0674847	0.00613497	0.0306748	0.9918	1.0029	1.0302	0.5397	6.1013	0.0214	1.8438	0.1411	1.0014	3.2904	0.1668	0.6641	1842	0.245385	0.285559	0.339848	0.129207	0.585233	0.625407	0.0428882	0.0450597	0.12975	0.0173724
NP001410_NM004523	1994	ELAVL1	HUR	NP001410.2	326	36090	0.0705521	0.00920245	0.0490798	0.0460123	0.0552147	0.0889571	0.0245399	0.0582822	0.0552147	0.0674847	0.0306748	0.0705521	0.0368098	0.0368098	0.0613497	0.0858896	0.0490798	0.0674847	0.00613497	0.0306748	0.9918	1.0029	1.0302	0.5397	6.1013	0.0214	1.8438	0.1411	1.0014	3.2904	0.1668	0.6641	3171	0.354778	0.169978	0.211921	0.263324	0.566698	0.381898	0.0999685	0.0596026	0.0816777	0.0778934
NP001410_NM004521	1994	ELAVL1	HUR	NP001410.2	326	36090	0.0705521	0.00920245	0.0490798	0.0460123	0.0552147	0.0889571	0.0245399	0.0582822	0.0552147	0.0674847	0.0306748	0.0705521	0.0368098	0.0368098	0.0613497	0.0858896	0.0490798	0.0674847	0.00613497	0.0306748	0.9918	1.0029	1.0302	0.5397	6.1013	0.0214	1.8438	0.1411	1.0014	3.2904	0.1668	0.6641	2892	0.36964	0.171853	0.231328	0.227178	0.600968	0.403181	0.106155	0.0542877	0.0995851	0.0701936
NP001410_NM030624	1994	ELAVL1	HUR	NP001410.2	326	36090	0.0705521	0.00920245	0.0490798	0.0460123	0.0552147	0.0889571	0.0245399	0.0582822	0.0552147	0.0674847	0.0306748	0.0705521	0.0368098	0.0368098	0.0613497	0.0858896	0.0490798	0.0674847	0.00613497	0.0306748	0.9918	1.0029	1.0302	0.5397	6.1013	0.0214	1.8438	0.1411	1.0014	3.2904	0.1668	0.6641	1815	0.27438	0.209366	0.242424	0.273829	0.516804	0.451791	0.0561983	0.0550964	0.077135	0.0749311
NP001410_NM032775	1994	ELAVL1	HUR	NP001410.2	326	36090	0.0705521	0.00920245	0.0490798	0.0460123	0.0552147	0.0889571	0.0245399	0.0582822	0.0552147	0.0674847	0.0306748	0.0705521	0.0368098	0.0368098	0.0613497	0.0858896	0.0490798	0.0674847	0.00613497	0.0306748	0.9918	1.0029	1.0302	0.5397	6.1013	0.0214	1.8438	0.1411	1.0014	3.2904	0.1668	0.6641	1905	0.211024	0.301837	0.290289	0.19685	0.501312	0.592126	0.0283465	0.0692913	0.0708661	0.0383202
NP001410_NM020803	1994	ELAVL1	HUR	NP001410.2	326	36090	0.0705521	0.00920245	0.0490798	0.0460123	0.0552147	0.0889571	0.0245399	0.0582822	0.0552147	0.0674847	0.0306748	0.0705521	0.0368098	0.0368098	0.0613497	0.0858896	0.0490798	0.0674847	0.00613497	0.0306748	0.9918	1.0029	1.0302	0.5397	6.1013	0.0214	1.8438	0.1411	1.0014	3.2904	0.1668	0.6641	1863	0.282877	0.173376	0.253892	0.289855	0.536769	0.427268	0.0654858	0.0391841	0.0778315	0.0810521
NP001410_NM002268	1994	ELAVL1	HUR	NP001410.2	326	36090	0.0705521	0.00920245	0.0490798	0.0460123	0.0552147	0.0889571	0.0245399	0.0582822	0.0552147	0.0674847	0.0306748	0.0705521	0.0368098	0.0368098	0.0613497	0.0858896	0.0490798	0.0674847	0.00613497	0.0306748	0.9918	1.0029	1.0302	0.5397	6.1013	0.0214	1.8438	0.1411	1.0014	3.2904	0.1668	0.6641	1566	0.324393	0.196679	0.207535	0.271392	0.531928	0.404215	0.0881226	0.0568327	0.0759898	0.0798212
NP001410_NM002265	1994	ELAVL1	HUR	NP001410.2	326	36090	0.0705521	0.00920245	0.0490798	0.0460123	0.0552147	0.0889571	0.0245399	0.0582822	0.0552147	0.0674847	0.0306748	0.0705521	0.0368098	0.0368098	0.0613497	0.0858896	0.0490798	0.0674847	0.00613497	0.0306748	0.9918	1.0029	1.0302	0.5397	6.1013	0.0214	1.8438	0.1411	1.0014	3.2904	0.1668	0.6641	2631	0.283162	0.212847	0.256176	0.247815	0.539339	0.469023	0.0611935	0.054732	0.0839985	0.0668947
NP001410_NM004985	1994	ELAVL1	HUR	NP001410.2	326	36090	0.0705521	0.00920245	0.0490798	0.0460123	0.0552147	0.0889571	0.0245399	0.0582822	0.0552147	0.0674847	0.0306748	0.0705521	0.0368098	0.0368098	0.0613497	0.0858896	0.0490798	0.0674847	0.00613497	0.0306748	0.9918	1.0029	1.0302	0.5397	6.1013	0.0214	1.8438	0.1411	1.0014	3.2904	0.1668	0.6641	567	0.37037	0.141093	0.234568	0.253968	0.604938	0.375661	0.0917108	0.0529101	0.100529	0.0846561
NP001410_NM173352	1994	ELAVL1	HUR	NP001410.2	326	36090	0.0705521	0.00920245	0.0490798	0.0460123	0.0552147	0.0889571	0.0245399	0.0582822	0.0552147	0.0674847	0.0306748	0.0705521	0.0368098	0.0368098	0.0613497	0.0858896	0.0490798	0.0674847	0.00613497	0.0306748	0.9918	1.0029	1.0302	0.5397	6.1013	0.0214	1.8438	0.1411	1.0014	3.2904	0.1668	0.6641	1563	0.214971	0.258477	0.338452	0.1881	0.553423	0.596929	0.0339091	0.0428663	0.107486	0.028151
NP001410_NM031964	1994	ELAVL1	HUR	NP001410.2	326	36090	0.0705521	0.00920245	0.0490798	0.0460123	0.0552147	0.0889571	0.0245399	0.0582822	0.0552147	0.0674847	0.0306748	0.0705521	0.0368098	0.0368098	0.0613497	0.0858896	0.0490798	0.0674847	0.00613497	0.0306748	0.9918	1.0029	1.0302	0.5397	6.1013	0.0214	1.8438	0.1411	1.0014	3.2904	0.1668	0.6641	318	0.110063	0.257862	0.40566	0.226415	0.515723	0.663522	0.0157233	0.0251572	0.0377358	0.0220126
NP001410_NM001136575	1994	ELAVL1	HUR	NP001410.2	326	36090	0.0705521	0.00920245	0.0490798	0.0460123	0.0552147	0.0889571	0.0245399	0.0582822	0.0552147	0.0674847	0.0306748	0.0705521	0.0368098	0.0368098	0.0613497	0.0858896	0.0490798	0.0674847	0.00613497	0.0306748	0.9918	1.0029	1.0302	0.5397	6.1013	0.0214	1.8438	0.1411	1.0014	3.2904	0.1668	0.6641	1200	0.264167	0.233333	0.24	0.2625	0.504167	0.473333	0.0591667	0.0483333	0.065	0.0758333
NP001410_NM015315	1994	ELAVL1	HUR	NP001410.2	326	36090	0.0705521	0.00920245	0.0490798	0.0460123	0.0552147	0.0889571	0.0245399	0.0582822	0.0552147	0.0674847	0.0306748	0.0705521	0.0368098	0.0368098	0.0613497	0.0858896	0.0490798	0.0674847	0.00613497	0.0306748	0.9918	1.0029	1.0302	0.5397	6.1013	0.0214	1.8438	0.1411	1.0014	3.2904	0.1668	0.6641	3060	0.26634	0.280392	0.263072	0.190196	0.529412	0.543464	0.054902	0.0647059	0.0882353	0.0411765
NP001410_NM194442	1994	ELAVL1	HUR	NP001410.2	326	36090	0.0705521	0.00920245	0.0490798	0.0460123	0.0552147	0.0889571	0.0245399	0.0582822	0.0552147	0.0674847	0.0306748	0.0705521	0.0368098	0.0368098	0.0613497	0.0858896	0.0490798	0.0674847	0.00613497	0.0306748	0.9918	1.0029	1.0302	0.5397	6.1013	0.0214	1.8438	0.1411	1.0014	3.2904	0.1668	0.6641	1848	0.260823	0.212121	0.228896	0.29816	0.489719	0.441017	0.0611472	0.0416667	0.0622294	0.0698052
NP001410_NM005565	1994	ELAVL1	HUR	NP001410.2	326	36090	0.0705521	0.00920245	0.0490798	0.0460123	0.0552147	0.0889571	0.0245399	0.0582822	0.0552147	0.0674847	0.0306748	0.0705521	0.0368098	0.0368098	0.0613497	0.0858896	0.0490798	0.0674847	0.00613497	0.0306748	0.9918	1.0029	1.0302	0.5397	6.1013	0.0214	1.8438	0.1411	1.0014	3.2904	0.1668	0.6641	1602	0.295256	0.291511	0.224719	0.188514	0.519975	0.51623	0.0674157	0.0661673	0.0905119	0.0505618
NP001410_NM001166119	1994	ELAVL1	HUR	NP001410.2	326	36090	0.0705521	0.00920245	0.0490798	0.0460123	0.0552147	0.0889571	0.0245399	0.0582822	0.0552147	0.0674847	0.0306748	0.0705521	0.0368098	0.0368098	0.0613497	0.0858896	0.0490798	0.0674847	0.00613497	0.0306748	0.9918	1.0029	1.0302	0.5397	6.1013	0.0214	1.8438	0.1411	1.0014	3.2904	0.1668	0.6641	912	0.304825	0.278509	0.207237	0.20943	0.512061	0.485746	0.060307	0.0679825	0.0811404	0.0712719
NP001410_NM001128208	1994	ELAVL1	HUR	NP001410.2	326	36090	0.0705521	0.00920245	0.0490798	0.0460123	0.0552147	0.0889571	0.0245399	0.0582822	0.0552147	0.0674847	0.0306748	0.0705521	0.0368098	0.0368098	0.0613497	0.0858896	0.0490798	0.0674847	0.00613497	0.0306748	0.9918	1.0029	1.0302	0.5397	6.1013	0.0214	1.8438	0.1411	1.0014	3.2904	0.1668	0.6641	510	0.233333	0.24902	0.235294	0.282353	0.468627	0.484314	0.0392157	0.0509804	0.0745098	0.0607843
NP001410_NM018362	1994	ELAVL1	HUR	NP001410.2	326	36090	0.0705521	0.00920245	0.0490798	0.0460123	0.0552147	0.0889571	0.0245399	0.0582822	0.0552147	0.0674847	0.0306748	0.0705521	0.0368098	0.0368098	0.0613497	0.0858896	0.0490798	0.0674847	0.00613497	0.0306748	0.9918	1.0029	1.0302	0.5397	6.1013	0.0214	1.8438	0.1411	1.0014	3.2904	0.1668	0.6641	594	0.335017	0.185185	0.259259	0.220539	0.594276	0.444444	0.0858586	0.0521886	0.0942761	0.0639731
NP001410_NM005573	1994	ELAVL1	HUR	NP001410.2	326	36090	0.0705521	0.00920245	0.0490798	0.0460123	0.0552147	0.0889571	0.0245399	0.0582822	0.0552147	0.0674847	0.0306748	0.0705521	0.0368098	0.0368098	0.0613497	0.0858896	0.0490798	0.0674847	0.00613497	0.0306748	0.9918	1.0029	1.0302	0.5397	6.1013	0.0214	1.8438	0.1411	1.0014	3.2904	0.1668	0.6641	1761	0.298126	0.218626	0.288472	0.194776	0.586599	0.507098	0.0692788	0.048268	0.107893	0.0516752
NP001410_NM014873	1994	ELAVL1	HUR	NP001410.2	326	36090	0.0705521	0.00920245	0.0490798	0.0460123	0.0552147	0.0889571	0.0245399	0.0582822	0.0552147	0.0674847	0.0306748	0.0705521	0.0368098	0.0368098	0.0613497	0.0858896	0.0490798	0.0674847	0.00613497	0.0306748	0.9918	1.0029	1.0302	0.5397	6.1013	0.0214	1.8438	0.1411	1.0014	3.2904	0.1668	0.6641	1113	0.30009	0.186882	0.230907	0.28212	0.530997	0.41779	0.0673854	0.0512129	0.0763702	0.081761
NP001410_NM001135703	1994	ELAVL1	HUR	NP001410.2	326	36090	0.0705521	0.00920245	0.0490798	0.0460123	0.0552147	0.0889571	0.0245399	0.0582822	0.0552147	0.0674847	0.0306748	0.0705521	0.0368098	0.0368098	0.0613497	0.0858896	0.0490798	0.0674847	0.00613497	0.0306748	0.9918	1.0029	1.0302	0.5397	6.1013	0.0214	1.8438	0.1411	1.0014	3.2904	0.1668	0.6641	2523	0.279033	0.196988	0.240587	0.283393	0.51962	0.437574	0.0646056	0.0495442	0.0737218	0.0725327
NP001410_NM152344	1994	ELAVL1	HUR	NP001410.2	326	36090	0.0705521	0.00920245	0.0490798	0.0460123	0.0552147	0.0889571	0.0245399	0.0582822	0.0552147	0.0674847	0.0306748	0.0705521	0.0368098	0.0368098	0.0613497	0.0858896	0.0490798	0.0674847	0.00613497	0.0306748	0.9918	1.0029	1.0302	0.5397	6.1013	0.0214	1.8438	0.1411	1.0014	3.2904	0.1668	0.6641	588	0.309524	0.241497	0.248299	0.20068	0.557823	0.489796	0.0765306	0.0527211	0.0986395	0.0459184
NP001410_NM015578	1994	ELAVL1	HUR	NP001410.2	326	36090	0.0705521	0.00920245	0.0490798	0.0460123	0.0552147	0.0889571	0.0245399	0.0582822	0.0552147	0.0674847	0.0306748	0.0705521	0.0368098	0.0368098	0.0613497	0.0858896	0.0490798	0.0674847	0.00613497	0.0306748	0.9918	1.0029	1.0302	0.5397	6.1013	0.0214	1.8438	0.1411	1.0014	3.2904	0.1668	0.6641	1392	0.295259	0.221983	0.257184	0.225575	0.552443	0.479167	0.0653736	0.0567529	0.0941092	0.0531609
NP001410_NM009588	1994	ELAVL1	HUR	NP001410.2	326	36090	0.0705521	0.00920245	0.0490798	0.0460123	0.0552147	0.0889571	0.0245399	0.0582822	0.0552147	0.0674847	0.0306748	0.0705521	0.0368098	0.0368098	0.0613497	0.0858896	0.0490798	0.0674847	0.00613497	0.0306748	0.9918	1.0029	1.0302	0.5397	6.1013	0.0214	1.8438	0.1411	1.0014	3.2904	0.1668	0.6641	234	0.162393	0.273504	0.367521	0.196581	0.529915	0.641026	0.00854701	0.0299145	0.0982906	0.0213675
NP001410_NM016019	1994	ELAVL1	HUR	NP001410.2	326	36090	0.0705521	0.00920245	0.0490798	0.0460123	0.0552147	0.0889571	0.0245399	0.0582822	0.0552147	0.0674847	0.0306748	0.0705521	0.0368098	0.0368098	0.0613497	0.0858896	0.0490798	0.0674847	0.00613497	0.0306748	0.9918	1.0029	1.0302	0.5397	6.1013	0.0214	1.8438	0.1411	1.0014	3.2904	0.1668	0.6641	1179	0.340119	0.19084	0.277354	0.191688	0.617472	0.468193	0.0788804	0.0407125	0.132316	0.0627651
NP001410_NM006330	1994	ELAVL1	HUR	NP001410.2	326	36090	0.0705521	0.00920245	0.0490798	0.0460123	0.0552147	0.0889571	0.0245399	0.0582822	0.0552147	0.0674847	0.0306748	0.0705521	0.0368098	0.0368098	0.0613497	0.0858896	0.0490798	0.0674847	0.00613497	0.0306748	0.9918	1.0029	1.0302	0.5397	6.1013	0.0214	1.8438	0.1411	1.0014	3.2904	0.1668	0.6641	693	0.25974	0.222222	0.238095	0.279942	0.497835	0.460317	0.0548341	0.046176	0.0519481	0.0865801
NP001410_NM198273	1994	ELAVL1	HUR	NP001410.2	326	36090	0.0705521	0.00920245	0.0490798	0.0460123	0.0552147	0.0889571	0.0245399	0.0582822	0.0552147	0.0674847	0.0306748	0.0705521	0.0368098	0.0368098	0.0613497	0.0858896	0.0490798	0.0674847	0.00613497	0.0306748	0.9918	1.0029	1.0302	0.5397	6.1013	0.0214	1.8438	0.1411	1.0014	3.2904	0.1668	0.6641	921	0.351792	0.180239	0.206298	0.261672	0.558089	0.386536	0.0846906	0.062975	0.0977199	0.0781759
NP001410_NM020347	1994	ELAVL1	HUR	NP001410.2	326	36090	0.0705521	0.00920245	0.0490798	0.0460123	0.0552147	0.0889571	0.0245399	0.0582822	0.0552147	0.0674847	0.0306748	0.0705521	0.0368098	0.0368098	0.0613497	0.0858896	0.0490798	0.0674847	0.00613497	0.0306748	0.9918	1.0029	1.0302	0.5397	6.1013	0.0214	1.8438	0.1411	1.0014	3.2904	0.1668	0.6641	900	0.378889	0.185556	0.215556	0.22	0.594444	0.401111	0.108889	0.0633333	0.104444	0.0611111
NP001410_NM006439	1994	ELAVL1	HUR	NP001410.2	326	36090	0.0705521	0.00920245	0.0490798	0.0460123	0.0552147	0.0889571	0.0245399	0.0582822	0.0552147	0.0674847	0.0306748	0.0705521	0.0368098	0.0368098	0.0613497	0.0858896	0.0490798	0.0674847	0.00613497	0.0306748	0.9918	1.0029	1.0302	0.5397	6.1013	0.0214	1.8438	0.1411	1.0014	3.2904	0.1668	0.6641	1080	0.206481	0.30463	0.307407	0.181481	0.513889	0.612037	0.0407407	0.0518519	0.0722222	0.0324074
NP001410_NM002364	1994	ELAVL1	HUR	NP001410.2	326	36090	0.0705521	0.00920245	0.0490798	0.0460123	0.0552147	0.0889571	0.0245399	0.0582822	0.0552147	0.0674847	0.0306748	0.0705521	0.0368098	0.0368098	0.0613497	0.0858896	0.0490798	0.0674847	0.00613497	0.0306748	0.9918	1.0029	1.0302	0.5397	6.1013	0.0214	1.8438	0.1411	1.0014	3.2904	0.1668	0.6641	960	0.267708	0.255208	0.258333	0.21875	0.526042	0.513542	0.0729167	0.0364583	0.0916667	0.0395833
NP001410_NM002755	1994	ELAVL1	HUR	NP001410.2	326	36090	0.0705521	0.00920245	0.0490798	0.0460123	0.0552147	0.0889571	0.0245399	0.0582822	0.0552147	0.0674847	0.0306748	0.0705521	0.0368098	0.0368098	0.0613497	0.0858896	0.0490798	0.0674847	0.00613497	0.0306748	0.9918	1.0029	1.0302	0.5397	6.1013	0.0214	1.8438	0.1411	1.0014	3.2904	0.1668	0.6641	1182	0.258037	0.247885	0.280034	0.214044	0.538071	0.527919	0.0575296	0.0423012	0.0913706	0.0558376
NP001410_NM002756	1994	ELAVL1	HUR	NP001410.2	326	36090	0.0705521	0.00920245	0.0490798	0.0460123	0.0552147	0.0889571	0.0245399	0.0582822	0.0552147	0.0674847	0.0306748	0.0705521	0.0368098	0.0368098	0.0613497	0.0858896	0.0490798	0.0674847	0.00613497	0.0306748	0.9918	1.0029	1.0302	0.5397	6.1013	0.0214	1.8438	0.1411	1.0014	3.2904	0.1668	0.6641	957	0.234065	0.282132	0.289446	0.194357	0.523511	0.571578	0.0386625	0.0668757	0.07628	0.0480669
NP001410_NM004834	1994	ELAVL1	HUR	NP001410.2	326	36090	0.0705521	0.00920245	0.0490798	0.0460123	0.0552147	0.0889571	0.0245399	0.0582822	0.0552147	0.0674847	0.0306748	0.0705521	0.0368098	0.0368098	0.0613497	0.0858896	0.0490798	0.0674847	0.00613497	0.0306748	0.9918	1.0029	1.0302	0.5397	6.1013	0.0214	1.8438	0.1411	1.0014	3.2904	0.1668	0.6641	3501	0.29563	0.215081	0.276207	0.213082	0.571837	0.491288	0.0625536	0.0519851	0.101971	0.059126
NP001410_NM001040439	1994	ELAVL1	HUR	NP001410.2	326	36090	0.0705521	0.00920245	0.0490798	0.0460123	0.0552147	0.0889571	0.0245399	0.0582822	0.0552147	0.0674847	0.0306748	0.0705521	0.0368098	0.0368098	0.0613497	0.0858896	0.0490798	0.0674847	0.00613497	0.0306748	0.9918	1.0029	1.0302	0.5397	6.1013	0.0214	1.8438	0.1411	1.0014	3.2904	0.1668	0.6641	3993	0.219634	0.306286	0.324818	0.149261	0.544453	0.631104	0.0353118	0.0601052	0.0881543	0.0313048
NP001410_NM001143826	1994	ELAVL1	HUR	NP001410.2	326	36090	0.0705521	0.00920245	0.0490798	0.0460123	0.0552147	0.0889571	0.0245399	0.0582822	0.0552147	0.0674847	0.0306748	0.0705521	0.0368098	0.0368098	0.0613497	0.0858896	0.0490798	0.0674847	0.00613497	0.0306748	0.9918	1.0029	1.0302	0.5397	6.1013	0.0214	1.8438	0.1411	1.0014	3.2904	0.1668	0.6641	855	0.327485	0.224561	0.226901	0.221053	0.554386	0.451462	0.0830409	0.0596491	0.0900585	0.0690058
NP001410_NM001163297	1994	ELAVL1	HUR	NP001410.2	326	36090	0.0705521	0.00920245	0.0490798	0.0460123	0.0552147	0.0889571	0.0245399	0.0582822	0.0552147	0.0674847	0.0306748	0.0705521	0.0368098	0.0368098	0.0613497	0.0858896	0.0490798	0.0674847	0.00613497	0.0306748	0.9918	1.0029	1.0302	0.5397	6.1013	0.0214	1.8438	0.1411	1.0014	3.2904	0.1668	0.6641	2130	0.261502	0.285915	0.264319	0.188263	0.525822	0.550235	0.0568075	0.0600939	0.0830986	0.0469484
NP001410_NM138395	1994	ELAVL1	HUR	NP001410.2	326	36090	0.0705521	0.00920245	0.0490798	0.0460123	0.0552147	0.0889571	0.0245399	0.0582822	0.0552147	0.0674847	0.0306748	0.0705521	0.0368098	0.0368098	0.0613497	0.0858896	0.0490798	0.0674847	0.00613497	0.0306748	0.9918	1.0029	1.0302	0.5397	6.1013	0.0214	1.8438	0.1411	1.0014	3.2904	0.1668	0.6641	1782	0.191919	0.292929	0.283951	0.231201	0.47587	0.57688	0.0286195	0.0527497	0.0634119	0.0398429
NP001410_NM013283	1994	ELAVL1	HUR	NP001410.2	326	36090	0.0705521	0.00920245	0.0490798	0.0460123	0.0552147	0.0889571	0.0245399	0.0582822	0.0552147	0.0674847	0.0306748	0.0705521	0.0368098	0.0368098	0.0613497	0.0858896	0.0490798	0.0674847	0.00613497	0.0306748	0.9918	1.0029	1.0302	0.5397	6.1013	0.0214	1.8438	0.1411	1.0014	3.2904	0.1668	0.6641	1005	0.293532	0.202985	0.247761	0.255721	0.541294	0.450746	0.0676617	0.0477612	0.0875622	0.0706468
NP001410_NM197957	1994	ELAVL1	HUR	NP001410.2	326	36090	0.0705521	0.00920245	0.0490798	0.0460123	0.0552147	0.0889571	0.0245399	0.0582822	0.0552147	0.0674847	0.0306748	0.0705521	0.0368098	0.0368098	0.0613497	0.0858896	0.0490798	0.0674847	0.00613497	0.0306748	0.9918	1.0029	1.0302	0.5397	6.1013	0.0214	1.8438	0.1411	1.0014	3.2904	0.1668	0.6641	252	0.301587	0.25	0.234127	0.214286	0.535714	0.484127	0.0753968	0.0833333	0.0714286	0.0515873
NP001410_NM207294	1994	ELAVL1	HUR	NP001410.2	326	36090	0.0705521	0.00920245	0.0490798	0.0460123	0.0552147	0.0889571	0.0245399	0.0582822	0.0552147	0.0674847	0.0306748	0.0705521	0.0368098	0.0368098	0.0613497	0.0858896	0.0490798	0.0674847	0.00613497	0.0306748	0.9918	1.0029	1.0302	0.5397	6.1013	0.0214	1.8438	0.1411	1.0014	3.2904	0.1668	0.6641	909	0.294829	0.275028	0.215622	0.214521	0.510451	0.490649	0.070407	0.0748075	0.0649065	0.0660066
NP001410_NM025205	1994	ELAVL1	HUR	NP001410.2	326	36090	0.0705521	0.00920245	0.0490798	0.0460123	0.0552147	0.0889571	0.0245399	0.0582822	0.0552147	0.0674847	0.0306748	0.0705521	0.0368098	0.0368098	0.0613497	0.0858896	0.0490798	0.0674847	0.00613497	0.0306748	0.9918	1.0029	1.0302	0.5397	6.1013	0.0214	1.8438	0.1411	1.0014	3.2904	0.1668	0.6641	537	0.253259	0.260708	0.26257	0.223464	0.515829	0.523277	0.0502793	0.0465549	0.0912477	0.0465549
NP001410_NM022566	1994	ELAVL1	HUR	NP001410.2	326	36090	0.0705521	0.00920245	0.0490798	0.0460123	0.0552147	0.0889571	0.0245399	0.0582822	0.0552147	0.0674847	0.0306748	0.0705521	0.0368098	0.0368098	0.0613497	0.0858896	0.0490798	0.0674847	0.00613497	0.0306748	0.9918	1.0029	1.0302	0.5397	6.1013	0.0214	1.8438	0.1411	1.0014	3.2904	0.1668	0.6641	1089	0.145087	0.330579	0.365473	0.158861	0.51056	0.696051	0.0183655	0.0376492	0.0707071	0.0183655
NP001410_NM015143	1994	ELAVL1	HUR	NP001410.2	326	36090	0.0705521	0.00920245	0.0490798	0.0460123	0.0552147	0.0889571	0.0245399	0.0582822	0.0552147	0.0674847	0.0306748	0.0705521	0.0368098	0.0368098	0.0613497	0.0858896	0.0490798	0.0674847	0.00613497	0.0306748	0.9918	1.0029	1.0302	0.5397	6.1013	0.0214	1.8438	0.1411	1.0014	3.2904	0.1668	0.6641	1161	0.286822	0.204996	0.250646	0.257537	0.537468	0.455642	0.0637382	0.0542636	0.0740741	0.0757967
NP001410_NM182924	1994	ELAVL1	HUR	NP001410.2	326	36090	0.0705521	0.00920245	0.0490798	0.0460123	0.0552147	0.0889571	0.0245399	0.0582822	0.0552147	0.0674847	0.0306748	0.0705521	0.0368098	0.0368098	0.0613497	0.0858896	0.0490798	0.0674847	0.00613497	0.0306748	0.9918	1.0029	1.0302	0.5397	6.1013	0.0214	1.8438	0.1411	1.0014	3.2904	0.1668	0.6641	2715	0.205893	0.3407	0.309761	0.143646	0.515654	0.65046	0.0335175	0.0508287	0.0953959	0.0198895
NP001410_NM005931	1994	ELAVL1	HUR	NP001410.2	326	36090	0.0705521	0.00920245	0.0490798	0.0460123	0.0552147	0.0889571	0.0245399	0.0582822	0.0552147	0.0674847	0.0306748	0.0705521	0.0368098	0.0368098	0.0613497	0.0858896	0.0490798	0.0674847	0.00613497	0.0306748	0.9918	1.0029	1.0302	0.5397	6.1013	0.0214	1.8438	0.1411	1.0014	3.2904	0.1668	0.6641	1152	0.236111	0.275174	0.28559	0.203125	0.521701	0.560764	0.0338542	0.0607639	0.0859375	0.0486111
NP001410_NM177401	1994	ELAVL1	HUR	NP001410.2	326	36090	0.0705521	0.00920245	0.0490798	0.0460123	0.0552147	0.0889571	0.0245399	0.0582822	0.0552147	0.0674847	0.0306748	0.0705521	0.0368098	0.0368098	0.0613497	0.0858896	0.0490798	0.0674847	0.00613497	0.0306748	0.9918	1.0029	1.0302	0.5397	6.1013	0.0214	1.8438	0.1411	1.0014	3.2904	0.1668	0.6641	1407	0.162758	0.389481	0.309879	0.137882	0.472637	0.69936	0.0220327	0.0525942	0.0682303	0.0156361
NP001410_NM017572	1994	ELAVL1	HUR	NP001410.2	326	36090	0.0705521	0.00920245	0.0490798	0.0460123	0.0552147	0.0889571	0.0245399	0.0582822	0.0552147	0.0674847	0.0306748	0.0705521	0.0368098	0.0368098	0.0613497	0.0858896	0.0490798	0.0674847	0.00613497	0.0306748	0.9918	1.0029	1.0302	0.5397	6.1013	0.0214	1.8438	0.1411	1.0014	3.2904	0.1668	0.6641	1245	0.209639	0.316466	0.299598	0.174297	0.509237	0.616064	0.0321285	0.0586345	0.0859438	0.0273092
NP001410_NM012329	1994	ELAVL1	HUR	NP001410.2	326	36090	0.0705521	0.00920245	0.0490798	0.0460123	0.0552147	0.0889571	0.0245399	0.0582822	0.0552147	0.0674847	0.0306748	0.0705521	0.0368098	0.0368098	0.0613497	0.0858896	0.0490798	0.0674847	0.00613497	0.0306748	0.9918	1.0029	1.0302	0.5397	6.1013	0.0214	1.8438	0.1411	1.0014	3.2904	0.1668	0.6641	717	0.232915	0.23431	0.224547	0.308229	0.457462	0.458856	0.0446304	0.0529986	0.0362622	0.0878661
NP001410_NM130807	1994	ELAVL1	HUR	NP001410.2	326	36090	0.0705521	0.00920245	0.0490798	0.0460123	0.0552147	0.0889571	0.0245399	0.0582822	0.0552147	0.0674847	0.0306748	0.0705521	0.0368098	0.0368098	0.0613497	0.0858896	0.0490798	0.0674847	0.00613497	0.0306748	0.9918	1.0029	1.0302	0.5397	6.1013	0.0214	1.8438	0.1411	1.0014	3.2904	0.1668	0.6641	654	0.215596	0.324159	0.278287	0.181957	0.493884	0.602446	0.0443425	0.0749235	0.0611621	0.030581
NP001410_NM006791	1994	ELAVL1	HUR	NP001410.2	326	36090	0.0705521	0.00920245	0.0490798	0.0460123	0.0552147	0.0889571	0.0245399	0.0582822	0.0552147	0.0674847	0.0306748	0.0705521	0.0368098	0.0368098	0.0613497	0.0858896	0.0490798	0.0674847	0.00613497	0.0306748	0.9918	1.0029	1.0302	0.5397	6.1013	0.0214	1.8438	0.1411	1.0014	3.2904	0.1668	0.6641	972	0.32716	0.1893	0.247942	0.235597	0.575103	0.437243	0.0833333	0.0493827	0.0853909	0.06893
NP001410_NM014763	1994	ELAVL1	HUR	NP001410.2	326	36090	0.0705521	0.00920245	0.0490798	0.0460123	0.0552147	0.0889571	0.0245399	0.0582822	0.0552147	0.0674847	0.0306748	0.0705521	0.0368098	0.0368098	0.0613497	0.0858896	0.0490798	0.0674847	0.00613497	0.0306748	0.9918	1.0029	1.0302	0.5397	6.1013	0.0214	1.8438	0.1411	1.0014	3.2904	0.1668	0.6641	879	0.290102	0.213879	0.25711	0.238908	0.547213	0.47099	0.076223	0.0352673	0.0807736	0.0682594
NP001410_NM172177	1994	ELAVL1	HUR	NP001410.2	326	36090	0.0705521	0.00920245	0.0490798	0.0460123	0.0552147	0.0889571	0.0245399	0.0582822	0.0552147	0.0674847	0.0306748	0.0705521	0.0368098	0.0368098	0.0613497	0.0858896	0.0490798	0.0674847	0.00613497	0.0306748	0.9918	1.0029	1.0302	0.5397	6.1013	0.0214	1.8438	0.1411	1.0014	3.2904	0.1668	0.6641	429	0.333333	0.205128	0.193473	0.268065	0.526807	0.398601	0.0839161	0.0675991	0.0606061	0.0909091
NP001410_NM022915	1994	ELAVL1	HUR	NP001410.2	326	36090	0.0705521	0.00920245	0.0490798	0.0460123	0.0552147	0.0889571	0.0245399	0.0582822	0.0552147	0.0674847	0.0306748	0.0705521	0.0368098	0.0368098	0.0613497	0.0858896	0.0490798	0.0674847	0.00613497	0.0306748	0.9918	1.0029	1.0302	0.5397	6.1013	0.0214	1.8438	0.1411	1.0014	3.2904	0.1668	0.6641	999	0.278278	0.222222	0.255255	0.244244	0.533534	0.477477	0.0700701	0.0510511	0.0910911	0.044044
NP001410_NM022163	1994	ELAVL1	HUR	NP001410.2	326	36090	0.0705521	0.00920245	0.0490798	0.0460123	0.0552147	0.0889571	0.0245399	0.0582822	0.0552147	0.0674847	0.0306748	0.0705521	0.0368098	0.0368098	0.0613497	0.0858896	0.0490798	0.0674847	0.00613497	0.0306748	0.9918	1.0029	1.0302	0.5397	6.1013	0.0214	1.8438	0.1411	1.0014	3.2904	0.1668	0.6641	840	0.264286	0.238095	0.291667	0.205952	0.555952	0.529762	0.0607143	0.052381	0.0940476	0.0428571
NP001410_NM138962	1994	ELAVL1	HUR	NP001410.2	326	36090	0.0705521	0.00920245	0.0490798	0.0460123	0.0552147	0.0889571	0.0245399	0.0582822	0.0552147	0.0674847	0.0306748	0.0705521	0.0368098	0.0368098	0.0613497	0.0858896	0.0490798	0.0674847	0.00613497	0.0306748	0.9918	1.0029	1.0302	0.5397	6.1013	0.0214	1.8438	0.1411	1.0014	3.2904	0.1668	0.6641	987	0.264438	0.247214	0.280648	0.2077	0.545086	0.527862	0.0536981	0.0496454	0.0820669	0.0607903
NP001410_NM004739	1994	ELAVL1	HUR	NP001410.2	326	36090	0.0705521	0.00920245	0.0490798	0.0460123	0.0552147	0.0889571	0.0245399	0.0582822	0.0552147	0.0674847	0.0306748	0.0705521	0.0368098	0.0368098	0.0613497	0.0858896	0.0490798	0.0674847	0.00613497	0.0306748	0.9918	1.0029	1.0302	0.5397	6.1013	0.0214	1.8438	0.1411	1.0014	3.2904	0.1668	0.6641	2007	0.256104	0.27155	0.263079	0.209268	0.519183	0.534629	0.0518186	0.062282	0.079721	0.0473343
NP001410_NM001164393	1994	ELAVL1	HUR	NP001410.2	326	36090	0.0705521	0.00920245	0.0490798	0.0460123	0.0552147	0.0889571	0.0245399	0.0582822	0.0552147	0.0674847	0.0306748	0.0705521	0.0368098	0.0368098	0.0613497	0.0858896	0.0490798	0.0674847	0.00613497	0.0306748	0.9918	1.0029	1.0302	0.5397	6.1013	0.0214	1.8438	0.1411	1.0014	3.2904	0.1668	0.6641	1476	0.331978	0.182249	0.229675	0.256098	0.561653	0.411924	0.0846883	0.052168	0.0806233	0.0819783
NP001410_NM006636	1994	ELAVL1	HUR	NP001410.2	326	36090	0.0705521	0.00920245	0.0490798	0.0460123	0.0552147	0.0889571	0.0245399	0.0582822	0.0552147	0.0674847	0.0306748	0.0705521	0.0368098	0.0368098	0.0613497	0.0858896	0.0490798	0.0674847	0.00613497	0.0306748	0.9918	1.0029	1.0302	0.5397	6.1013	0.0214	1.8438	0.1411	1.0014	3.2904	0.1668	0.6641	1053	0.283951	0.205128	0.261159	0.249763	0.545109	0.466287	0.0750237	0.0379867	0.0759734	0.0759734
NP001410_NM004685	1994	ELAVL1	HUR	NP001410.2	326	36090	0.0705521	0.00920245	0.0490798	0.0460123	0.0552147	0.0889571	0.0245399	0.0582822	0.0552147	0.0674847	0.0306748	0.0705521	0.0368098	0.0368098	0.0613497	0.0858896	0.0490798	0.0674847	0.00613497	0.0306748	0.9918	1.0029	1.0302	0.5397	6.1013	0.0214	1.8438	0.1411	1.0014	3.2904	0.1668	0.6641	1866	0.312969	0.198821	0.20686	0.28135	0.519829	0.405681	0.079314	0.0498392	0.0755627	0.0836013
NP001410_NM138373	1994	ELAVL1	HUR	NP001410.2	326	36090	0.0705521	0.00920245	0.0490798	0.0460123	0.0552147	0.0889571	0.0245399	0.0582822	0.0552147	0.0674847	0.0306748	0.0705521	0.0368098	0.0368098	0.0613497	0.0858896	0.0490798	0.0674847	0.00613497	0.0306748	0.9918	1.0029	1.0302	0.5397	6.1013	0.0214	1.8438	0.1411	1.0014	3.2904	0.1668	0.6641	969	0.136223	0.367389	0.267286	0.229102	0.403509	0.634675	0.0144479	0.0546956	0.0288958	0.0371517
NP001410_NM001161657	1994	ELAVL1	HUR	NP001410.2	326	36090	0.0705521	0.00920245	0.0490798	0.0460123	0.0552147	0.0889571	0.0245399	0.0582822	0.0552147	0.0674847	0.0306748	0.0705521	0.0368098	0.0368098	0.0613497	0.0858896	0.0490798	0.0674847	0.00613497	0.0306748	0.9918	1.0029	1.0302	0.5397	6.1013	0.0214	1.8438	0.1411	1.0014	3.2904	0.1668	0.6641	1668	0.326139	0.233213	0.226019	0.214628	0.552158	0.459233	0.0845324	0.0677458	0.0845324	0.0623501
NP001410_NM002467	1994	ELAVL1	HUR	NP001410.2	326	36090	0.0705521	0.00920245	0.0490798	0.0460123	0.0552147	0.0889571	0.0245399	0.0582822	0.0552147	0.0674847	0.0306748	0.0705521	0.0368098	0.0368098	0.0613497	0.0858896	0.0490798	0.0674847	0.00613497	0.0306748	0.9918	1.0029	1.0302	0.5397	6.1013	0.0214	1.8438	0.1411	1.0014	3.2904	0.1668	0.6641	1365	0.240293	0.324542	0.262271	0.172894	0.502564	0.586813	0.047619	0.0659341	0.0871795	0.0249084
NP001410_NM033054	1994	ELAVL1	HUR	NP001410.2	326	36090	0.0705521	0.00920245	0.0490798	0.0460123	0.0552147	0.0889571	0.0245399	0.0582822	0.0552147	0.0674847	0.0306748	0.0705521	0.0368098	0.0368098	0.0613497	0.0858896	0.0490798	0.0674847	0.00613497	0.0306748	0.9918	1.0029	1.0302	0.5397	6.1013	0.0214	1.8438	0.1411	1.0014	3.2904	0.1668	0.6641	3057	0.209356	0.307164	0.305855	0.177625	0.515211	0.613019	0.0317305	0.0657507	0.0755643	0.0336932
NP001410_NM001146313	1994	ELAVL1	HUR	NP001410.2	326	36090	0.0705521	0.00920245	0.0490798	0.0460123	0.0552147	0.0889571	0.0245399	0.0582822	0.0552147	0.0674847	0.0306748	0.0705521	0.0368098	0.0368098	0.0613497	0.0858896	0.0490798	0.0674847	0.00613497	0.0306748	0.9918	1.0029	1.0302	0.5397	6.1013	0.0214	1.8438	0.1411	1.0014	3.2904	0.1668	0.6641	2055	0.256448	0.310949	0.227737	0.204866	0.484185	0.538686	0.059854	0.0554745	0.0827251	0.0374696
NP001410_NM005966	1994	ELAVL1	HUR	NP001410.2	326	36090	0.0705521	0.00920245	0.0490798	0.0460123	0.0552147	0.0889571	0.0245399	0.0582822	0.0552147	0.0674847	0.0306748	0.0705521	0.0368098	0.0368098	0.0613497	0.0858896	0.0490798	0.0674847	0.00613497	0.0306748	0.9918	1.0029	1.0302	0.5397	6.1013	0.0214	1.8438	0.1411	1.0014	3.2904	0.1668	0.6641	1464	0.295082	0.224044	0.257514	0.223361	0.552596	0.481557	0.0642077	0.0498634	0.10041	0.056694
NP001410_NM005967	1994	ELAVL1	HUR	NP001410.2	326	36090	0.0705521	0.00920245	0.0490798	0.0460123	0.0552147	0.0889571	0.0245399	0.0582822	0.0552147	0.0674847	0.0306748	0.0705521	0.0368098	0.0368098	0.0613497	0.0858896	0.0490798	0.0674847	0.00613497	0.0306748	0.9918	1.0029	1.0302	0.5397	6.1013	0.0214	1.8438	0.1411	1.0014	3.2904	0.1668	0.6641	1578	0.205323	0.30038	0.330798	0.163498	0.536122	0.631179	0.0272497	0.0437262	0.0982256	0.0304183
NP001410_NM139207	1994	ELAVL1	HUR	NP001410.2	326	36090	0.0705521	0.00920245	0.0490798	0.0460123	0.0552147	0.0889571	0.0245399	0.0582822	0.0552147	0.0674847	0.0306748	0.0705521	0.0368098	0.0368098	0.0613497	0.0858896	0.0490798	0.0674847	0.00613497	0.0306748	0.9918	1.0029	1.0302	0.5397	6.1013	0.0214	1.8438	0.1411	1.0014	3.2904	0.1668	0.6641	1176	0.357993	0.153061	0.238095	0.25085	0.596088	0.391156	0.10119	0.047619	0.0969388	0.0782313
NP001410_NM003826	1994	ELAVL1	HUR	NP001410.2	326	36090	0.0705521	0.00920245	0.0490798	0.0460123	0.0552147	0.0889571	0.0245399	0.0582822	0.0552147	0.0674847	0.0306748	0.0705521	0.0368098	0.0368098	0.0613497	0.0858896	0.0490798	0.0674847	0.00613497	0.0306748	0.9918	1.0029	1.0302	0.5397	6.1013	0.0214	1.8438	0.1411	1.0014	3.2904	0.1668	0.6641	939	0.325879	0.191693	0.255591	0.226837	0.58147	0.447284	0.0841321	0.0489883	0.0979766	0.0660277
NP001410_NM002485	1994	ELAVL1	HUR	NP001410.2	326	36090	0.0705521	0.00920245	0.0490798	0.0460123	0.0552147	0.0889571	0.0245399	0.0582822	0.0552147	0.0674847	0.0306748	0.0705521	0.0368098	0.0368098	0.0613497	0.0858896	0.0490798	0.0674847	0.00613497	0.0306748	0.9918	1.0029	1.0302	0.5397	6.1013	0.0214	1.8438	0.1411	1.0014	3.2904	0.1668	0.6641	2265	0.369978	0.175276	0.207064	0.247682	0.577042	0.38234	0.10596	0.0538631	0.0799117	0.0812362
NP001410_NM005381	1994	ELAVL1	HUR	NP001410.2	326	36090	0.0705521	0.00920245	0.0490798	0.0460123	0.0552147	0.0889571	0.0245399	0.0582822	0.0552147	0.0674847	0.0306748	0.0705521	0.0368098	0.0368098	0.0613497	0.0858896	0.0490798	0.0674847	0.00613497	0.0306748	0.9918	1.0029	1.0302	0.5397	6.1013	0.0214	1.8438	0.1411	1.0014	3.2904	0.1668	0.6641	2133	0.348336	0.168308	0.298172	0.185185	0.646507	0.466479	0.0932958	0.0454759	0.11955	0.0525082
NP001410_NM001161407	1994	ELAVL1	HUR	NP001410.2	326	36090	0.0705521	0.00920245	0.0490798	0.0460123	0.0552147	0.0889571	0.0245399	0.0582822	0.0552147	0.0674847	0.0306748	0.0705521	0.0368098	0.0368098	0.0613497	0.0858896	0.0490798	0.0674847	0.00613497	0.0306748	0.9918	1.0029	1.0302	0.5397	6.1013	0.0214	1.8438	0.1411	1.0014	3.2904	0.1668	0.6641	951	0.23449	0.251314	0.280757	0.233438	0.515247	0.532072	0.0399579	0.0483701	0.0809674	0.0557308
NP001410_NM001135176	1994	ELAVL1	HUR	NP001410.2	326	36090	0.0705521	0.00920245	0.0490798	0.0460123	0.0552147	0.0889571	0.0245399	0.0582822	0.0552147	0.0674847	0.0306748	0.0705521	0.0368098	0.0368098	0.0613497	0.0858896	0.0490798	0.0674847	0.00613497	0.0306748	0.9918	1.0029	1.0302	0.5397	6.1013	0.0214	1.8438	0.1411	1.0014	3.2904	0.1668	0.6641	1983	0.332325	0.188099	0.202219	0.277358	0.534544	0.390318	0.0872416	0.0549672	0.0736258	0.0821987
NP001410_NM001135748	1994	ELAVL1	HUR	NP001410.2	326	36090	0.0705521	0.00920245	0.0490798	0.0460123	0.0552147	0.0889571	0.0245399	0.0582822	0.0552147	0.0674847	0.0306748	0.0705521	0.0368098	0.0368098	0.0613497	0.0858896	0.0490798	0.0674847	0.00613497	0.0306748	0.9918	1.0029	1.0302	0.5397	6.1013	0.0214	1.8438	0.1411	1.0014	3.2904	0.1668	0.6641	651	0.210445	0.268817	0.296467	0.22427	0.506912	0.565284	0.030722	0.0430108	0.104455	0.0276498
NP001410_NM133494	1994	ELAVL1	HUR	NP001410.2	326	36090	0.0705521	0.00920245	0.0490798	0.0460123	0.0552147	0.0889571	0.0245399	0.0582822	0.0552147	0.0674847	0.0306748	0.0705521	0.0368098	0.0368098	0.0613497	0.0858896	0.0490798	0.0674847	0.00613497	0.0306748	0.9918	1.0029	1.0302	0.5397	6.1013	0.0214	1.8438	0.1411	1.0014	3.2904	0.1668	0.6641	909	0.328933	0.19692	0.205721	0.268427	0.534653	0.40264	0.080308	0.0561056	0.0781078	0.0891089
NP001410_NM005863	1994	ELAVL1	HUR	NP001410.2	326	36090	0.0705521	0.00920245	0.0490798	0.0460123	0.0552147	0.0889571	0.0245399	0.0582822	0.0552147	0.0674847	0.0306748	0.0705521	0.0368098	0.0368098	0.0613497	0.0858896	0.0490798	0.0674847	0.00613497	0.0306748	0.9918	1.0029	1.0302	0.5397	6.1013	0.0214	1.8438	0.1411	1.0014	3.2904	0.1668	0.6641	1629	0.289748	0.244936	0.245549	0.219767	0.535298	0.490485	0.0601596	0.058318	0.100675	0.0515654
NP001410_NM018092	1994	ELAVL1	HUR	NP001410.2	326	36090	0.0705521	0.00920245	0.0490798	0.0460123	0.0552147	0.0889571	0.0245399	0.0582822	0.0552147	0.0674847	0.0306748	0.0705521	0.0368098	0.0368098	0.0613497	0.0858896	0.0490798	0.0674847	0.00613497	0.0306748	0.9918	1.0029	1.0302	0.5397	6.1013	0.0214	1.8438	0.1411	1.0014	3.2904	0.1668	0.6641	1578	0.298479	0.210393	0.222433	0.268695	0.520913	0.432826	0.0779468	0.0475285	0.0741445	0.0735108
NP001410_NM006599	1994	ELAVL1	HUR	NP001410.2	326	36090	0.0705521	0.00920245	0.0490798	0.0460123	0.0552147	0.0889571	0.0245399	0.0582822	0.0552147	0.0674847	0.0306748	0.0705521	0.0368098	0.0368098	0.0613497	0.0858896	0.0490798	0.0674847	0.00613497	0.0306748	0.9918	1.0029	1.0302	0.5397	6.1013	0.0214	1.8438	0.1411	1.0014	3.2904	0.1668	0.6641	4596	0.311358	0.248259	0.200174	0.240209	0.511532	0.448433	0.0750653	0.0652742	0.0894256	0.0620104
NP001410_NM001145512	1994	ELAVL1	HUR	NP001410.2	326	36090	0.0705521	0.00920245	0.0490798	0.0460123	0.0552147	0.0889571	0.0245399	0.0582822	0.0552147	0.0674847	0.0306748	0.0705521	0.0368098	0.0368098	0.0613497	0.0858896	0.0490798	0.0674847	0.00613497	0.0306748	0.9918	1.0029	1.0302	0.5397	6.1013	0.0214	1.8438	0.1411	1.0014	3.2904	0.1668	0.6641	1665	0.261862	0.29009	0.234234	0.213814	0.496096	0.524324	0.0564565	0.0612613	0.0774775	0.0486486
NP001410_NM006166	1994	ELAVL1	HUR	NP001410.2	326	36090	0.0705521	0.00920245	0.0490798	0.0460123	0.0552147	0.0889571	0.0245399	0.0582822	0.0552147	0.0674847	0.0306748	0.0705521	0.0368098	0.0368098	0.0613497	0.0858896	0.0490798	0.0674847	0.00613497	0.0306748	0.9918	1.0029	1.0302	0.5397	6.1013	0.0214	1.8438	0.1411	1.0014	3.2904	0.1668	0.6641	624	0.365385	0.165064	0.216346	0.253205	0.581731	0.38141	0.0913462	0.0608974	0.0897436	0.0913462
NP001410_NM001142589	1994	ELAVL1	HUR	NP001410.2	326	36090	0.0705521	0.00920245	0.0490798	0.0460123	0.0552147	0.0889571	0.0245399	0.0582822	0.0552147	0.0674847	0.0306748	0.0705521	0.0368098	0.0368098	0.0613497	0.0858896	0.0490798	0.0674847	0.00613497	0.0306748	0.9918	1.0029	1.0302	0.5397	6.1013	0.0214	1.8438	0.1411	1.0014	3.2904	0.1668	0.6641	894	0.277405	0.289709	0.257271	0.175615	0.534676	0.54698	0.041387	0.0592841	0.112975	0.0536913
NP001410_NM198514	1994	ELAVL1	HUR	NP001410.2	326	36090	0.0705521	0.00920245	0.0490798	0.0460123	0.0552147	0.0889571	0.0245399	0.0582822	0.0552147	0.0674847	0.0306748	0.0705521	0.0368098	0.0368098	0.0613497	0.0858896	0.0490798	0.0674847	0.00613497	0.0306748	0.9918	1.0029	1.0302	0.5397	6.1013	0.0214	1.8438	0.1411	1.0014	3.2904	0.1668	0.6641	2181	0.311784	0.202659	0.223751	0.261807	0.535534	0.42641	0.0724438	0.0568547	0.084365	0.0729023
NP001410_NM015469	1994	ELAVL1	HUR	NP001410.2	326	36090	0.0705521	0.00920245	0.0490798	0.0460123	0.0552147	0.0889571	0.0245399	0.0582822	0.0552147	0.0674847	0.0306748	0.0705521	0.0368098	0.0368098	0.0613497	0.0858896	0.0490798	0.0674847	0.00613497	0.0306748	0.9918	1.0029	1.0302	0.5397	6.1013	0.0214	1.8438	0.1411	1.0014	3.2904	0.1668	0.6641	744	0.28629	0.204301	0.240591	0.268817	0.526882	0.444892	0.0658602	0.0483871	0.0752688	0.0739247
NP001410_NM015938	1994	ELAVL1	HUR	NP001410.2	326	36090	0.0705521	0.00920245	0.0490798	0.0460123	0.0552147	0.0889571	0.0245399	0.0582822	0.0552147	0.0674847	0.0306748	0.0705521	0.0368098	0.0368098	0.0613497	0.0858896	0.0490798	0.0674847	0.00613497	0.0306748	0.9918	1.0029	1.0302	0.5397	6.1013	0.0214	1.8438	0.1411	1.0014	3.2904	0.1668	0.6641	1512	0.319444	0.183862	0.224868	0.271825	0.544312	0.40873	0.0800265	0.0489418	0.0760582	0.0833333
NP001410_NM001145410	1994	ELAVL1	HUR	NP001410.2	326	36090	0.0705521	0.00920245	0.0490798	0.0460123	0.0552147	0.0889571	0.0245399	0.0582822	0.0552147	0.0674847	0.0306748	0.0705521	0.0368098	0.0368098	0.0613497	0.0858896	0.0490798	0.0674847	0.00613497	0.0306748	0.9918	1.0029	1.0302	0.5397	6.1013	0.0214	1.8438	0.1411	1.0014	3.2904	0.1668	0.6641	1149	0.280244	0.228895	0.294169	0.196693	0.574413	0.523064	0.0652742	0.0443864	0.0974761	0.0557006
NP001410_NM001161364	1994	ELAVL1	HUR	NP001410.2	326	36090	0.0705521	0.00920245	0.0490798	0.0460123	0.0552147	0.0889571	0.0245399	0.0582822	0.0552147	0.0674847	0.0306748	0.0705521	0.0368098	0.0368098	0.0613497	0.0858896	0.0490798	0.0674847	0.00613497	0.0306748	0.9918	1.0029	1.0302	0.5397	6.1013	0.0214	1.8438	0.1411	1.0014	3.2904	0.1668	0.6641	837	0.270012	0.273596	0.242533	0.213859	0.512545	0.516129	0.0633214	0.0645161	0.0681004	0.0573477
NP001410_NM002524	1994	ELAVL1	HUR	NP001410.2	326	36090	0.0705521	0.00920245	0.0490798	0.0460123	0.0552147	0.0889571	0.0245399	0.0582822	0.0552147	0.0674847	0.0306748	0.0705521	0.0368098	0.0368098	0.0613497	0.0858896	0.0490798	0.0674847	0.00613497	0.0306748	0.9918	1.0029	1.0302	0.5397	6.1013	0.0214	1.8438	0.1411	1.0014	3.2904	0.1668	0.6641	570	0.324561	0.180702	0.263158	0.231579	0.587719	0.44386	0.0736842	0.0736842	0.0842105	0.0719298
NP001410_NM016588	1994	ELAVL1	HUR	NP001410.2	326	36090	0.0705521	0.00920245	0.0490798	0.0460123	0.0552147	0.0889571	0.0245399	0.0582822	0.0552147	0.0674847	0.0306748	0.0705521	0.0368098	0.0368098	0.0613497	0.0858896	0.0490798	0.0674847	0.00613497	0.0306748	0.9918	1.0029	1.0302	0.5397	6.1013	0.0214	1.8438	0.1411	1.0014	3.2904	0.1668	0.6641	429	0.230769	0.263403	0.298368	0.207459	0.529138	0.561772	0.0512821	0.0559441	0.0629371	0.044289
NP001410_NM182543	1994	ELAVL1	HUR	NP001410.2	326	36090	0.0705521	0.00920245	0.0490798	0.0460123	0.0552147	0.0889571	0.0245399	0.0582822	0.0552147	0.0674847	0.0306748	0.0705521	0.0368098	0.0368098	0.0613497	0.0858896	0.0490798	0.0674847	0.00613497	0.0306748	0.9918	1.0029	1.0302	0.5397	6.1013	0.0214	1.8438	0.1411	1.0014	3.2904	0.1668	0.6641	1410	0.317021	0.190071	0.226241	0.266667	0.543262	0.416312	0.0808511	0.0546099	0.0815603	0.0730496
NP001410_NM001007792	1994	ELAVL1	HUR	NP001410.2	326	36090	0.0705521	0.00920245	0.0490798	0.0460123	0.0552147	0.0889571	0.0245399	0.0582822	0.0552147	0.0674847	0.0306748	0.0705521	0.0368098	0.0368098	0.0613497	0.0858896	0.0490798	0.0674847	0.00613497	0.0306748	0.9918	1.0029	1.0302	0.5397	6.1013	0.0214	1.8438	0.1411	1.0014	3.2904	0.1668	0.6641	2283	0.182654	0.306176	0.310556	0.200613	0.493211	0.616732	0.0293474	0.0543145	0.0608848	0.0346036
NP001410_NM005013	1994	ELAVL1	HUR	NP001410.2	326	36090	0.0705521	0.00920245	0.0490798	0.0460123	0.0552147	0.0889571	0.0245399	0.0582822	0.0552147	0.0674847	0.0306748	0.0705521	0.0368098	0.0368098	0.0613497	0.0858896	0.0490798	0.0674847	0.00613497	0.0306748	0.9918	1.0029	1.0302	0.5397	6.1013	0.0214	1.8438	0.1411	1.0014	3.2904	0.1668	0.6641	1263	0.405384	0.151227	0.219319	0.22407	0.624703	0.370546	0.118765	0.0562154	0.102138	0.0855107
NP001410_NM022731	1994	ELAVL1	HUR	NP001410.2	326	36090	0.0705521	0.00920245	0.0490798	0.0460123	0.0552147	0.0889571	0.0245399	0.0582822	0.0552147	0.0674847	0.0306748	0.0705521	0.0368098	0.0368098	0.0613497	0.0858896	0.0490798	0.0674847	0.00613497	0.0306748	0.9918	1.0029	1.0302	0.5397	6.1013	0.0214	1.8438	0.1411	1.0014	3.2904	0.1668	0.6641	732	0.38388	0.187158	0.266393	0.162568	0.650273	0.453552	0.10929	0.0368852	0.120219	0.0655738
NP001410_NM019094	1994	ELAVL1	HUR	NP001410.2	326	36090	0.0705521	0.00920245	0.0490798	0.0460123	0.0552147	0.0889571	0.0245399	0.0582822	0.0552147	0.0674847	0.0306748	0.0705521	0.0368098	0.0368098	0.0613497	0.0858896	0.0490798	0.0674847	0.00613497	0.0306748	0.9918	1.0029	1.0302	0.5397	6.1013	0.0214	1.8438	0.1411	1.0014	3.2904	0.1668	0.6641	543	0.285451	0.20442	0.292818	0.217311	0.578269	0.497238	0.0662983	0.0441989	0.104972	0.0515654
NP001410_NM001008564	1994	ELAVL1	HUR	NP001410.2	326	36090	0.0705521	0.00920245	0.0490798	0.0460123	0.0552147	0.0889571	0.0245399	0.0582822	0.0552147	0.0674847	0.0306748	0.0705521	0.0368098	0.0368098	0.0613497	0.0858896	0.0490798	0.0674847	0.00613497	0.0306748	0.9918	1.0029	1.0302	0.5397	6.1013	0.0214	1.8438	0.1411	1.0014	3.2904	0.1668	0.6641	1764	0.294785	0.235828	0.228458	0.24093	0.523243	0.464286	0.0736961	0.069161	0.0810658	0.047619
NP001410_NM130831	1994	ELAVL1	HUR	NP001410.2	326	36090	0.0705521	0.00920245	0.0490798	0.0460123	0.0552147	0.0889571	0.0245399	0.0582822	0.0552147	0.0674847	0.0306748	0.0705521	0.0368098	0.0368098	0.0613497	0.0858896	0.0490798	0.0674847	0.00613497	0.0306748	0.9918	1.0029	1.0302	0.5397	6.1013	0.0214	1.8438	0.1411	1.0014	3.2904	0.1668	0.6641	2775	0.335856	0.176577	0.227387	0.26018	0.563243	0.403964	0.0872072	0.0554955	0.083964	0.0738739
NP001410_NM002551	1994	ELAVL1	HUR	NP001410.2	326	36090	0.0705521	0.00920245	0.0490798	0.0460123	0.0552147	0.0889571	0.0245399	0.0582822	0.0552147	0.0674847	0.0306748	0.0705521	0.0368098	0.0368098	0.0613497	0.0858896	0.0490798	0.0674847	0.00613497	0.0306748	0.9918	1.0029	1.0302	0.5397	6.1013	0.0214	1.8438	0.1411	1.0014	3.2904	0.1668	0.6641	966	0.198758	0.301242	0.23499	0.26501	0.433747	0.536232	0.0310559	0.0641822	0.0548654	0.0403727
NP001410_NM014028	1994	ELAVL1	HUR	NP001410.2	326	36090	0.0705521	0.00920245	0.0490798	0.0460123	0.0552147	0.0889571	0.0245399	0.0582822	0.0552147	0.0674847	0.0306748	0.0705521	0.0368098	0.0368098	0.0613497	0.0858896	0.0490798	0.0674847	0.00613497	0.0306748	0.9918	1.0029	1.0302	0.5397	6.1013	0.0214	1.8438	0.1411	1.0014	3.2904	0.1668	0.6641	1005	0.252736	0.254726	0.248756	0.243781	0.501493	0.503483	0.0606965	0.0527363	0.0696517	0.0477612
NP001410_NM016023	1994	ELAVL1	HUR	NP001410.2	326	36090	0.0705521	0.00920245	0.0490798	0.0460123	0.0552147	0.0889571	0.0245399	0.0582822	0.0552147	0.0674847	0.0306748	0.0705521	0.0368098	0.0368098	0.0613497	0.0858896	0.0490798	0.0674847	0.00613497	0.0306748	0.9918	1.0029	1.0302	0.5397	6.1013	0.0214	1.8438	0.1411	1.0014	3.2904	0.1668	0.6641	972	0.347737	0.167695	0.259259	0.225309	0.606996	0.426955	0.090535	0.0504115	0.102881	0.0709877
NP001410_NM130901	1994	ELAVL1	HUR	NP001410.2	326	36090	0.0705521	0.00920245	0.0490798	0.0460123	0.0552147	0.0889571	0.0245399	0.0582822	0.0552147	0.0674847	0.0306748	0.0705521	0.0368098	0.0368098	0.0613497	0.0858896	0.0490798	0.0674847	0.00613497	0.0306748	0.9918	1.0029	1.0302	0.5397	6.1013	0.0214	1.8438	0.1411	1.0014	3.2904	0.1668	0.6641	2781	0.19849	0.315354	0.34448	0.141676	0.54297	0.659835	0.037037	0.0564545	0.0776699	0.0230133
NP001410_NM005109	1994	ELAVL1	HUR	NP001410.2	326	36090	0.0705521	0.00920245	0.0490798	0.0460123	0.0552147	0.0889571	0.0245399	0.0582822	0.0552147	0.0674847	0.0306748	0.0705521	0.0368098	0.0368098	0.0613497	0.0858896	0.0490798	0.0674847	0.00613497	0.0306748	0.9918	1.0029	1.0302	0.5397	6.1013	0.0214	1.8438	0.1411	1.0014	3.2904	0.1668	0.6641	1584	0.321338	0.195707	0.234848	0.248106	0.556187	0.430556	0.082702	0.0448232	0.0858586	0.0719697
NP001410_NM001142596	1994	ELAVL1	HUR	NP001410.2	326	36090	0.0705521	0.00920245	0.0490798	0.0460123	0.0552147	0.0889571	0.0245399	0.0582822	0.0552147	0.0674847	0.0306748	0.0705521	0.0368098	0.0368098	0.0613497	0.0858896	0.0490798	0.0674847	0.00613497	0.0306748	0.9918	1.0029	1.0302	0.5397	6.1013	0.0214	1.8438	0.1411	1.0014	3.2904	0.1668	0.6641	1551	0.322373	0.180529	0.235977	0.261122	0.558349	0.416505	0.0760799	0.0496454	0.0857511	0.0812379
NP001410_NM004643	1994	ELAVL1	HUR	NP001410.2	326	36090	0.0705521	0.00920245	0.0490798	0.0460123	0.0552147	0.0889571	0.0245399	0.0582822	0.0552147	0.0674847	0.0306748	0.0705521	0.0368098	0.0368098	0.0613497	0.0858896	0.0490798	0.0674847	0.00613497	0.0306748	0.9918	1.0029	1.0302	0.5397	6.1013	0.0214	1.8438	0.1411	1.0014	3.2904	0.1668	0.6641	921	0.219327	0.269273	0.353963	0.157438	0.57329	0.623236	0.0380022	0.0423453	0.0944625	0.0358306
NP001410_NM001184747	1994	ELAVL1	HUR	NP001410.2	326	36090	0.0705521	0.00920245	0.0490798	0.0460123	0.0552147	0.0889571	0.0245399	0.0582822	0.0552147	0.0674847	0.0306748	0.0705521	0.0368098	0.0368098	0.0613497	0.0858896	0.0490798	0.0674847	0.00613497	0.0306748	0.9918	1.0029	1.0302	0.5397	6.1013	0.0214	1.8438	0.1411	1.0014	3.2904	0.1668	0.6641	468	0.337607	0.17735	0.254274	0.230769	0.59188	0.431624	0.0747863	0.0598291	0.0982906	0.0833333
NP001410_NM002577	1994	ELAVL1	HUR	NP001410.2	326	36090	0.0705521	0.00920245	0.0490798	0.0460123	0.0552147	0.0889571	0.0245399	0.0582822	0.0552147	0.0674847	0.0306748	0.0705521	0.0368098	0.0368098	0.0613497	0.0858896	0.0490798	0.0674847	0.00613497	0.0306748	0.9918	1.0029	1.0302	0.5397	6.1013	0.0214	1.8438	0.1411	1.0014	3.2904	0.1668	0.6641	1575	0.320635	0.209524	0.231746	0.238095	0.552381	0.44127	0.0768254	0.0628571	0.0806349	0.0698413
NP001410_NM175854	1994	ELAVL1	HUR	NP001410.2	326	36090	0.0705521	0.00920245	0.0490798	0.0460123	0.0552147	0.0889571	0.0245399	0.0582822	0.0552147	0.0674847	0.0306748	0.0705521	0.0368098	0.0368098	0.0613497	0.0858896	0.0490798	0.0674847	0.00613497	0.0306748	0.9918	1.0029	1.0302	0.5397	6.1013	0.0214	1.8438	0.1411	1.0014	3.2904	0.1668	0.6641	2664	0.263514	0.240991	0.243243	0.252252	0.506757	0.484234	0.0596847	0.0506757	0.0683183	0.0668168
NP001410_NM002586	1994	ELAVL1	HUR	NP001410.2	326	36090	0.0705521	0.00920245	0.0490798	0.0460123	0.0552147	0.0889571	0.0245399	0.0582822	0.0552147	0.0674847	0.0306748	0.0705521	0.0368098	0.0368098	0.0613497	0.0858896	0.0490798	0.0674847	0.00613497	0.0306748	0.9918	1.0029	1.0302	0.5397	6.1013	0.0214	1.8438	0.1411	1.0014	3.2904	0.1668	0.6641	1293	0.233565	0.283836	0.309358	0.173241	0.542923	0.593194	0.0402166	0.0518175	0.0835267	0.0440835
NP001410_NM006196	1994	ELAVL1	HUR	NP001410.2	326	36090	0.0705521	0.00920245	0.0490798	0.0460123	0.0552147	0.0889571	0.0245399	0.0582822	0.0552147	0.0674847	0.0306748	0.0705521	0.0368098	0.0368098	0.0613497	0.0858896	0.0490798	0.0674847	0.00613497	0.0306748	0.9918	1.0029	1.0302	0.5397	6.1013	0.0214	1.8438	0.1411	1.0014	3.2904	0.1668	0.6641	1071	0.237162	0.283847	0.285714	0.193277	0.522876	0.569561	0.0457516	0.0485528	0.0718954	0.0616247
NP001410_NM001130141	1994	ELAVL1	HUR	NP001410.2	326	36090	0.0705521	0.00920245	0.0490798	0.0460123	0.0552147	0.0889571	0.0245399	0.0582822	0.0552147	0.0674847	0.0306748	0.0705521	0.0368098	0.0368098	0.0613497	0.0858896	0.0490798	0.0674847	0.00613497	0.0306748	0.9918	1.0029	1.0302	0.5397	6.1013	0.0214	1.8438	0.1411	1.0014	3.2904	0.1668	0.6641	1038	0.258189	0.302505	0.264933	0.174374	0.523121	0.567437	0.0510597	0.0539499	0.083815	0.0578035
NP001410_NM006315	1994	ELAVL1	HUR	NP001410.2	326	36090	0.0705521	0.00920245	0.0490798	0.0460123	0.0552147	0.0889571	0.0245399	0.0582822	0.0552147	0.0674847	0.0306748	0.0705521	0.0368098	0.0368098	0.0613497	0.0858896	0.0490798	0.0674847	0.00613497	0.0306748	0.9918	1.0029	1.0302	0.5397	6.1013	0.0214	1.8438	0.1411	1.0014	3.2904	0.1668	0.6641	729	0.281207	0.268861	0.27572	0.174211	0.556927	0.544582	0.0562414	0.0768176	0.0877915	0.042524
NP001410_NM052937	1994	ELAVL1	HUR	NP001410.2	326	36090	0.0705521	0.00920245	0.0490798	0.0460123	0.0552147	0.0889571	0.0245399	0.0582822	0.0552147	0.0674847	0.0306748	0.0705521	0.0368098	0.0368098	0.0613497	0.0858896	0.0490798	0.0674847	0.00613497	0.0306748	0.9918	1.0029	1.0302	0.5397	6.1013	0.0214	1.8438	0.1411	1.0014	3.2904	0.1668	0.6641	1074	0.339851	0.166667	0.229981	0.263501	0.569832	0.396648	0.0875233	0.047486	0.0865922	0.0837989
NP001410_NM020357	1994	ELAVL1	HUR	NP001410.2	326	36090	0.0705521	0.00920245	0.0490798	0.0460123	0.0552147	0.0889571	0.0245399	0.0582822	0.0552147	0.0674847	0.0306748	0.0705521	0.0368098	0.0368098	0.0613497	0.0858896	0.0490798	0.0674847	0.00613497	0.0306748	0.9918	1.0029	1.0302	0.5397	6.1013	0.0214	1.8438	0.1411	1.0014	3.2904	0.1668	0.6641	537	0.359404	0.206704	0.247672	0.18622	0.607076	0.454376	0.104283	0.0446927	0.10987	0.0577281
NP001410_NM005388	1994	ELAVL1	HUR	NP001410.2	326	36090	0.0705521	0.00920245	0.0490798	0.0460123	0.0552147	0.0889571	0.0245399	0.0582822	0.0552147	0.0674847	0.0306748	0.0705521	0.0368098	0.0368098	0.0613497	0.0858896	0.0490798	0.0674847	0.00613497	0.0306748	0.9918	1.0029	1.0302	0.5397	6.1013	0.0214	1.8438	0.1411	1.0014	3.2904	0.1668	0.6641	906	0.280353	0.201987	0.300221	0.217439	0.580574	0.502208	0.0562914	0.0397351	0.112583	0.0607064
NP001410_NM004911	1994	ELAVL1	HUR	NP001410.2	326	36090	0.0705521	0.00920245	0.0490798	0.0460123	0.0552147	0.0889571	0.0245399	0.0582822	0.0552147	0.0674847	0.0306748	0.0705521	0.0368098	0.0368098	0.0613497	0.0858896	0.0490798	0.0674847	0.00613497	0.0306748	0.9918	1.0029	1.0302	0.5397	6.1013	0.0214	1.8438	0.1411	1.0014	3.2904	0.1668	0.6641	1938	0.272446	0.247162	0.27967	0.200722	0.552116	0.526832	0.0624355	0.0515996	0.0928793	0.0464396
NP001410_NM152835	1994	ELAVL1	HUR	NP001410.2	326	36090	0.0705521	0.00920245	0.0490798	0.0460123	0.0552147	0.0889571	0.0245399	0.0582822	0.0552147	0.0674847	0.0306748	0.0705521	0.0368098	0.0368098	0.0613497	0.0858896	0.0490798	0.0674847	0.00613497	0.0306748	0.9918	1.0029	1.0302	0.5397	6.1013	0.0214	1.8438	0.1411	1.0014	3.2904	0.1668	0.6641	1026	0.306043	0.197856	0.238791	0.25731	0.544834	0.436647	0.0779727	0.0526316	0.0750487	0.0682261
NP001410_NM020651	1994	ELAVL1	HUR	NP001410.2	326	36090	0.0705521	0.00920245	0.0490798	0.0460123	0.0552147	0.0889571	0.0245399	0.0582822	0.0552147	0.0674847	0.0306748	0.0705521	0.0368098	0.0368098	0.0613497	0.0858896	0.0490798	0.0674847	0.00613497	0.0306748	0.9918	1.0029	1.0302	0.5397	6.1013	0.0214	1.8438	0.1411	1.0014	3.2904	0.1668	0.6641	1257	0.293556	0.209228	0.235481	0.261734	0.529037	0.44471	0.0684169	0.0556881	0.0660302	0.0779634
NP001410_NM021255	1994	ELAVL1	HUR	NP001410.2	326	36090	0.0705521	0.00920245	0.0490798	0.0460123	0.0552147	0.0889571	0.0245399	0.0582822	0.0552147	0.0674847	0.0306748	0.0705521	0.0368098	0.0368098	0.0613497	0.0858896	0.0490798	0.0674847	0.00613497	0.0306748	0.9918	1.0029	1.0302	0.5397	6.1013	0.0214	1.8438	0.1411	1.0014	3.2904	0.1668	0.6641	1263	0.251781	0.266033	0.27791	0.204276	0.529691	0.543943	0.0467142	0.0657165	0.0728424	0.050673
NP001410_NM012394	1994	ELAVL1	HUR	NP001410.2	326	36090	0.0705521	0.00920245	0.0490798	0.0460123	0.0552147	0.0889571	0.0245399	0.0582822	0.0552147	0.0674847	0.0306748	0.0705521	0.0368098	0.0368098	0.0613497	0.0858896	0.0490798	0.0674847	0.00613497	0.0306748	0.9918	1.0029	1.0302	0.5397	6.1013	0.0214	1.8438	0.1411	1.0014	3.2904	0.1668	0.6641	465	0.288172	0.208602	0.346237	0.156989	0.634409	0.554839	0.0688172	0.0430108	0.122581	0.0365591
NP001410_NM002626	1994	ELAVL1	HUR	NP001410.2	326	36090	0.0705521	0.00920245	0.0490798	0.0460123	0.0552147	0.0889571	0.0245399	0.0582822	0.0552147	0.0674847	0.0306748	0.0705521	0.0368098	0.0368098	0.0613497	0.0858896	0.0490798	0.0674847	0.00613497	0.0306748	0.9918	1.0029	1.0302	0.5397	6.1013	0.0214	1.8438	0.1411	1.0014	3.2904	0.1668	0.6641	2343	0.201451	0.291507	0.330773	0.17627	0.532224	0.622279	0.0337175	0.0610329	0.0648741	0.0388391
NP001410_NM032507	1994	ELAVL1	HUR	NP001410.2	326	36090	0.0705521	0.00920245	0.0490798	0.0460123	0.0552147	0.0889571	0.0245399	0.0582822	0.0552147	0.0674847	0.0306748	0.0705521	0.0368098	0.0368098	0.0613497	0.0858896	0.0490798	0.0674847	0.00613497	0.0306748	0.9918	1.0029	1.0302	0.5397	6.1013	0.0214	1.8438	0.1411	1.0014	3.2904	0.1668	0.6641	2430	0.307819	0.199588	0.24856	0.244033	0.556379	0.448148	0.0786008	0.0485597	0.0901235	0.0658436
NP001410_NM000291	1994	ELAVL1	HUR	NP001410.2	326	36090	0.0705521	0.00920245	0.0490798	0.0460123	0.0552147	0.0889571	0.0245399	0.0582822	0.0552147	0.0674847	0.0306748	0.0705521	0.0368098	0.0368098	0.0613497	0.0858896	0.0490798	0.0674847	0.00613497	0.0306748	0.9918	1.0029	1.0302	0.5397	6.1013	0.0214	1.8438	0.1411	1.0014	3.2904	0.1668	0.6641	1254	0.257576	0.213716	0.288676	0.240032	0.546252	0.502392	0.0661882	0.0414673	0.0845295	0.0502392
NP001410_NM005392	1994	ELAVL1	HUR	NP001410.2	326	36090	0.0705521	0.00920245	0.0490798	0.0460123	0.0552147	0.0889571	0.0245399	0.0582822	0.0552147	0.0674847	0.0306748	0.0705521	0.0368098	0.0368098	0.0613497	0.0858896	0.0490798	0.0674847	0.00613497	0.0306748	0.9918	1.0029	1.0302	0.5397	6.1013	0.0214	1.8438	0.1411	1.0014	3.2904	0.1668	0.6641	3291	0.256457	0.299909	0.279246	0.164388	0.535703	0.579155	0.0598602	0.0622911	0.0881191	0.0288666
NP001410_NM032205	1994	ELAVL1	HUR	NP001410.2	326	36090	0.0705521	0.00920245	0.0490798	0.0460123	0.0552147	0.0889571	0.0245399	0.0582822	0.0552147	0.0674847	0.0306748	0.0705521	0.0368098	0.0368098	0.0613497	0.0858896	0.0490798	0.0674847	0.00613497	0.0306748	0.9918	1.0029	1.0302	0.5397	6.1013	0.0214	1.8438	0.1411	1.0014	3.2904	0.1668	0.6641	1722	0.325203	0.209059	0.2259	0.239837	0.551103	0.434959	0.083043	0.0470383	0.0969803	0.0627178
NP001410_NM007350	1994	ELAVL1	HUR	NP001410.2	326	36090	0.0705521	0.00920245	0.0490798	0.0460123	0.0552147	0.0889571	0.0245399	0.0582822	0.0552147	0.0674847	0.0306748	0.0705521	0.0368098	0.0368098	0.0613497	0.0858896	0.0490798	0.0674847	0.00613497	0.0306748	0.9918	1.0029	1.0302	0.5397	6.1013	0.0214	1.8438	0.1411	1.0014	3.2904	0.1668	0.6641	1206	0.195688	0.368988	0.304312	0.131012	0.5	0.6733	0.0339967	0.0472637	0.0870647	0.0207297
NP001410_NM145167	1994	ELAVL1	HUR	NP001410.2	326	36090	0.0705521	0.00920245	0.0490798	0.0460123	0.0552147	0.0889571	0.0245399	0.0582822	0.0552147	0.0674847	0.0306748	0.0705521	0.0368098	0.0368098	0.0613497	0.0858896	0.0490798	0.0674847	0.00613497	0.0306748	0.9918	1.0029	1.0302	0.5397	6.1013	0.0214	1.8438	0.1411	1.0014	3.2904	0.1668	0.6641	1272	0.19261	0.269654	0.227987	0.309748	0.420597	0.497642	0.0330189	0.0550314	0.0503145	0.0455975
NP001410_NM002648	1994	ELAVL1	HUR	NP001410.2	326	36090	0.0705521	0.00920245	0.0490798	0.0460123	0.0552147	0.0889571	0.0245399	0.0582822	0.0552147	0.0674847	0.0306748	0.0705521	0.0368098	0.0368098	0.0613497	0.0858896	0.0490798	0.0674847	0.00613497	0.0306748	0.9918	1.0029	1.0302	0.5397	6.1013	0.0214	1.8438	0.1411	1.0014	3.2904	0.1668	0.6641	942	0.207006	0.298301	0.298301	0.196391	0.505308	0.596603	0.0350318	0.0467091	0.0721868	0.0456476
NP001410_NM012399	1994	ELAVL1	HUR	NP001410.2	326	36090	0.0705521	0.00920245	0.0490798	0.0460123	0.0552147	0.0889571	0.0245399	0.0582822	0.0552147	0.0674847	0.0306748	0.0705521	0.0368098	0.0368098	0.0613497	0.0858896	0.0490798	0.0674847	0.00613497	0.0306748	0.9918	1.0029	1.0302	0.5397	6.1013	0.0214	1.8438	0.1411	1.0014	3.2904	0.1668	0.6641	816	0.330882	0.180147	0.252451	0.23652	0.583333	0.432598	0.0857843	0.0526961	0.0894608	0.0710784
NP001410_NM001130715	1994	ELAVL1	HUR	NP001410.2	326	36090	0.0705521	0.00920245	0.0490798	0.0460123	0.0552147	0.0889571	0.0245399	0.0582822	0.0552147	0.0674847	0.0306748	0.0705521	0.0368098	0.0368098	0.0613497	0.0858896	0.0490798	0.0674847	0.00613497	0.0306748	0.9918	1.0029	1.0302	0.5397	6.1013	0.0214	1.8438	0.1411	1.0014	3.2904	0.1668	0.6641	348	0.218391	0.25	0.264368	0.267241	0.482759	0.514368	0.045977	0.0488506	0.0574713	0.0603448
NP001410_NM002661	1994	ELAVL1	HUR	NP001410.2	326	36090	0.0705521	0.00920245	0.0490798	0.0460123	0.0552147	0.0889571	0.0245399	0.0582822	0.0552147	0.0674847	0.0306748	0.0705521	0.0368098	0.0368098	0.0613497	0.0858896	0.0490798	0.0674847	0.00613497	0.0306748	0.9918	1.0029	1.0302	0.5397	6.1013	0.0214	1.8438	0.1411	1.0014	3.2904	0.1668	0.6641	3798	0.269089	0.260664	0.264086	0.206161	0.533175	0.52475	0.0542391	0.0613481	0.0863612	0.0521327
NP001410_NM012388	1994	ELAVL1	HUR	NP001410.2	326	36090	0.0705521	0.00920245	0.0490798	0.0460123	0.0552147	0.0889571	0.0245399	0.0582822	0.0552147	0.0674847	0.0306748	0.0705521	0.0368098	0.0368098	0.0613497	0.0858896	0.0490798	0.0674847	0.00613497	0.0306748	0.9918	1.0029	1.0302	0.5397	6.1013	0.0214	1.8438	0.1411	1.0014	3.2904	0.1668	0.6641	519	0.344894	0.190751	0.254335	0.210019	0.599229	0.445087	0.0924855	0.0558767	0.105973	0.0520231
NP001410_NM021622	1994	ELAVL1	HUR	NP001410.2	326	36090	0.0705521	0.00920245	0.0490798	0.0460123	0.0552147	0.0889571	0.0245399	0.0582822	0.0552147	0.0674847	0.0306748	0.0705521	0.0368098	0.0368098	0.0613497	0.0858896	0.0490798	0.0674847	0.00613497	0.0306748	0.9918	1.0029	1.0302	0.5397	6.1013	0.0214	1.8438	0.1411	1.0014	3.2904	0.1668	0.6641	1215	0.316049	0.216461	0.222222	0.245267	0.538272	0.438683	0.0823045	0.0600823	0.0798354	0.0609053
NP001410_NM021127	1994	ELAVL1	HUR	NP001410.2	326	36090	0.0705521	0.00920245	0.0490798	0.0460123	0.0552147	0.0889571	0.0245399	0.0582822	0.0552147	0.0674847	0.0306748	0.0705521	0.0368098	0.0368098	0.0613497	0.0858896	0.0490798	0.0674847	0.00613497	0.0306748	0.9918	1.0029	1.0302	0.5397	6.1013	0.0214	1.8438	0.1411	1.0014	3.2904	0.1668	0.6641	165	0.278788	0.272727	0.266667	0.181818	0.545455	0.539394	0.0787879	0.0606061	0.0848485	0.030303
NP001410_NM018129	1994	ELAVL1	HUR	NP001410.2	326	36090	0.0705521	0.00920245	0.0490798	0.0460123	0.0552147	0.0889571	0.0245399	0.0582822	0.0552147	0.0674847	0.0306748	0.0705521	0.0368098	0.0368098	0.0613497	0.0858896	0.0490798	0.0674847	0.00613497	0.0306748	0.9918	1.0029	1.0302	0.5397	6.1013	0.0214	1.8438	0.1411	1.0014	3.2904	0.1668	0.6641	786	0.220102	0.267176	0.300254	0.212468	0.520356	0.56743	0.0419847	0.0534351	0.0763359	0.0330789
NP001410_NM145796	1994	ELAVL1	HUR	NP001410.2	326	36090	0.0705521	0.00920245	0.0490798	0.0460123	0.0552147	0.0889571	0.0245399	0.0582822	0.0552147	0.0674847	0.0306748	0.0705521	0.0368098	0.0368098	0.0613497	0.0858896	0.0490798	0.0674847	0.00613497	0.0306748	0.9918	1.0029	1.0302	0.5397	6.1013	0.0214	1.8438	0.1411	1.0014	3.2904	0.1668	0.6641	1092	0.260073	0.302198	0.223443	0.214286	0.483516	0.525641	0.0549451	0.0732601	0.0769231	0.0448718
NP001410_NM005837	1994	ELAVL1	HUR	NP001410.2	326	36090	0.0705521	0.00920245	0.0490798	0.0460123	0.0552147	0.0889571	0.0245399	0.0582822	0.0552147	0.0674847	0.0306748	0.0705521	0.0368098	0.0368098	0.0613497	0.0858896	0.0490798	0.0674847	0.00613497	0.0306748	0.9918	1.0029	1.0302	0.5397	6.1013	0.0214	1.8438	0.1411	1.0014	3.2904	0.1668	0.6641	423	0.231678	0.309693	0.29078	0.167849	0.522459	0.600473	0.0449173	0.0661939	0.0732861	0.0401891
NP001410_NM002697	1994	ELAVL1	HUR	NP001410.2	326	36090	0.0705521	0.00920245	0.0490798	0.0460123	0.0552147	0.0889571	0.0245399	0.0582822	0.0552147	0.0674847	0.0306748	0.0705521	0.0368098	0.0368098	0.0613497	0.0858896	0.0490798	0.0674847	0.00613497	0.0306748	0.9918	1.0029	1.0302	0.5397	6.1013	0.0214	1.8438	0.1411	1.0014	3.2904	0.1668	0.6641	2232	0.258065	0.320789	0.21819	0.202957	0.476254	0.538978	0.0528674	0.0681004	0.0882616	0.0367384
NP001410_NM004792	1994	ELAVL1	HUR	NP001410.2	326	36090	0.0705521	0.00920245	0.0490798	0.0460123	0.0552147	0.0889571	0.0245399	0.0582822	0.0552147	0.0674847	0.0306748	0.0705521	0.0368098	0.0368098	0.0613497	0.0858896	0.0490798	0.0674847	0.00613497	0.0306748	0.9918	1.0029	1.0302	0.5397	6.1013	0.0214	1.8438	0.1411	1.0014	3.2904	0.1668	0.6641	2265	0.422517	0.153642	0.236203	0.187638	0.65872	0.389845	0.124062	0.0437086	0.132009	0.0640177
NP001410_NM152542	1994	ELAVL1	HUR	NP001410.2	326	36090	0.0705521	0.00920245	0.0490798	0.0460123	0.0552147	0.0889571	0.0245399	0.0582822	0.0552147	0.0674847	0.0306748	0.0705521	0.0368098	0.0368098	0.0613497	0.0858896	0.0490798	0.0674847	0.00613497	0.0306748	0.9918	1.0029	1.0302	0.5397	6.1013	0.0214	1.8438	0.1411	1.0014	3.2904	0.1668	0.6641	1119	0.277927	0.209115	0.265416	0.247542	0.543342	0.474531	0.0625559	0.0554066	0.0813226	0.0598749
NP001410_NM206876	1994	ELAVL1	HUR	NP001410.2	326	36090	0.0705521	0.00920245	0.0490798	0.0460123	0.0552147	0.0889571	0.0245399	0.0582822	0.0552147	0.0674847	0.0306748	0.0705521	0.0368098	0.0368098	0.0613497	0.0858896	0.0490798	0.0674847	0.00613497	0.0306748	0.9918	1.0029	1.0302	0.5397	6.1013	0.0214	1.8438	0.1411	1.0014	3.2904	0.1668	0.6641	984	0.280488	0.169715	0.247967	0.301829	0.528455	0.417683	0.0579268	0.0386179	0.070122	0.0934959
NP001410_NM002710	1994	ELAVL1	HUR	NP001410.2	326	36090	0.0705521	0.00920245	0.0490798	0.0460123	0.0552147	0.0889571	0.0245399	0.0582822	0.0552147	0.0674847	0.0306748	0.0705521	0.0368098	0.0368098	0.0613497	0.0858896	0.0490798	0.0674847	0.00613497	0.0306748	0.9918	1.0029	1.0302	0.5397	6.1013	0.0214	1.8438	0.1411	1.0014	3.2904	0.1668	0.6641	972	0.300412	0.186214	0.235597	0.277778	0.536008	0.421811	0.06893	0.0483539	0.0751029	0.0833333
NP001410_NM001143886	1994	ELAVL1	HUR	NP001410.2	326	36090	0.0705521	0.00920245	0.0490798	0.0460123	0.0552147	0.0889571	0.0245399	0.0582822	0.0552147	0.0674847	0.0306748	0.0705521	0.0368098	0.0368098	0.0613497	0.0858896	0.0490798	0.0674847	0.00613497	0.0306748	0.9918	1.0029	1.0302	0.5397	6.1013	0.0214	1.8438	0.1411	1.0014	3.2904	0.1668	0.6641	2832	0.382768	0.181497	0.221398	0.214336	0.604167	0.402895	0.105932	0.0635593	0.106992	0.065678
NP001410_NM032833	1994	ELAVL1	HUR	NP001410.2	326	36090	0.0705521	0.00920245	0.0490798	0.0460123	0.0552147	0.0889571	0.0245399	0.0582822	0.0552147	0.0674847	0.0306748	0.0705521	0.0368098	0.0368098	0.0613497	0.0858896	0.0490798	0.0674847	0.00613497	0.0306748	0.9918	1.0029	1.0302	0.5397	6.1013	0.0214	1.8438	0.1411	1.0014	3.2904	0.1668	0.6641	2142	0.265173	0.247432	0.2507	0.236695	0.515873	0.498133	0.0592904	0.0550887	0.0868347	0.0485528
NP001410_NM006241	1994	ELAVL1	HUR	NP001410.2	326	36090	0.0705521	0.00920245	0.0490798	0.0460123	0.0552147	0.0889571	0.0245399	0.0582822	0.0552147	0.0674847	0.0306748	0.0705521	0.0368098	0.0368098	0.0613497	0.0858896	0.0490798	0.0674847	0.00613497	0.0306748	0.9918	1.0029	1.0302	0.5397	6.1013	0.0214	1.8438	0.1411	1.0014	3.2904	0.1668	0.6641	618	0.359223	0.20712	0.252427	0.18123	0.61165	0.459547	0.0954693	0.0614887	0.092233	0.0776699
NP001410_NM006246	1994	ELAVL1	HUR	NP001410.2	326	36090	0.0705521	0.00920245	0.0490798	0.0460123	0.0552147	0.0889571	0.0245399	0.0582822	0.0552147	0.0674847	0.0306748	0.0705521	0.0368098	0.0368098	0.0613497	0.0858896	0.0490798	0.0674847	0.00613497	0.0306748	0.9918	1.0029	1.0302	0.5397	6.1013	0.0214	1.8438	0.1411	1.0014	3.2904	0.1668	0.6641	1404	0.32265	0.193732	0.206553	0.277066	0.529202	0.400285	0.0826211	0.0569801	0.0804843	0.0740741
NP001410_NM000945	1994	ELAVL1	HUR	NP001410.2	326	36090	0.0705521	0.00920245	0.0490798	0.0460123	0.0552147	0.0889571	0.0245399	0.0582822	0.0552147	0.0674847	0.0306748	0.0705521	0.0368098	0.0368098	0.0613497	0.0858896	0.0490798	0.0674847	0.00613497	0.0306748	0.9918	1.0029	1.0302	0.5397	6.1013	0.0214	1.8438	0.1411	1.0014	3.2904	0.1668	0.6641	513	0.331384	0.130604	0.261209	0.276803	0.592593	0.391813	0.0779727	0.0350877	0.0916179	0.0955166
NP001410_NM002720	1994	ELAVL1	HUR	NP001410.2	326	36090	0.0705521	0.00920245	0.0490798	0.0460123	0.0552147	0.0889571	0.0245399	0.0582822	0.0552147	0.0674847	0.0306748	0.0705521	0.0368098	0.0368098	0.0613497	0.0858896	0.0490798	0.0674847	0.00613497	0.0306748	0.9918	1.0029	1.0302	0.5397	6.1013	0.0214	1.8438	0.1411	1.0014	3.2904	0.1668	0.6641	924	0.219697	0.28355	0.288961	0.207792	0.508658	0.572511	0.0313853	0.0606061	0.0735931	0.0487013
NP001410_NM174907	1994	ELAVL1	HUR	NP001410.2	326	36090	0.0705521	0.00920245	0.0490798	0.0460123	0.0552147	0.0889571	0.0245399	0.0582822	0.0552147	0.0674847	0.0306748	0.0705521	0.0368098	0.0368098	0.0613497	0.0858896	0.0490798	0.0674847	0.00613497	0.0306748	0.9918	1.0029	1.0302	0.5397	6.1013	0.0214	1.8438	0.1411	1.0014	3.2904	0.1668	0.6641	1254	0.354864	0.172249	0.235247	0.23764	0.590112	0.407496	0.0964912	0.0430622	0.102073	0.0725678
NP001410_NM001123369	1994	ELAVL1	HUR	NP001410.2	326	36090	0.0705521	0.00920245	0.0490798	0.0460123	0.0552147	0.0889571	0.0245399	0.0582822	0.0552147	0.0674847	0.0306748	0.0705521	0.0368098	0.0368098	0.0613497	0.0858896	0.0490798	0.0674847	0.00613497	0.0306748	0.9918	1.0029	1.0302	0.5397	6.1013	0.0214	1.8438	0.1411	1.0014	3.2904	0.1668	0.6641	852	0.294601	0.193662	0.232394	0.279343	0.526995	0.426056	0.056338	0.0551643	0.0751174	0.0821596
NP001410_NM020229	1994	ELAVL1	HUR	NP001410.2	326	36090	0.0705521	0.00920245	0.0490798	0.0460123	0.0552147	0.0889571	0.0245399	0.0582822	0.0552147	0.0674847	0.0306748	0.0705521	0.0368098	0.0368098	0.0613497	0.0858896	0.0490798	0.0674847	0.00613497	0.0306748	0.9918	1.0029	1.0302	0.5397	6.1013	0.0214	1.8438	0.1411	1.0014	3.2904	0.1668	0.6641	1536	0.246094	0.261068	0.302083	0.190755	0.548177	0.563151	0.0455729	0.0527344	0.0950521	0.0436198
NP001410_NM001042386	1994	ELAVL1	HUR	NP001410.2	326	36090	0.0705521	0.00920245	0.0490798	0.0460123	0.0552147	0.0889571	0.0245399	0.0582822	0.0552147	0.0674847	0.0306748	0.0705521	0.0368098	0.0368098	0.0613497	0.0858896	0.0490798	0.0674847	0.00613497	0.0306748	0.9918	1.0029	1.0302	0.5397	6.1013	0.0214	1.8438	0.1411	1.0014	3.2904	0.1668	0.6641	1986	0.324773	0.188822	0.21148	0.274924	0.536254	0.400302	0.0861027	0.0563948	0.0715005	0.0840886
NP001410_NM024429	1994	ELAVL1	HUR	NP001410.2	326	36090	0.0705521	0.00920245	0.0490798	0.0460123	0.0552147	0.0889571	0.0245399	0.0582822	0.0552147	0.0674847	0.0306748	0.0705521	0.0368098	0.0368098	0.0613497	0.0858896	0.0490798	0.0674847	0.00613497	0.0306748	0.9918	1.0029	1.0302	0.5397	6.1013	0.0214	1.8438	0.1411	1.0014	3.2904	0.1668	0.6641	987	0.321175	0.196555	0.213779	0.26849	0.534954	0.410334	0.0729483	0.0577508	0.0780142	0.0840932
NP001410_NM002734	1994	ELAVL1	HUR	NP001410.2	326	36090	0.0705521	0.00920245	0.0490798	0.0460123	0.0552147	0.0889571	0.0245399	0.0582822	0.0552147	0.0674847	0.0306748	0.0705521	0.0368098	0.0368098	0.0613497	0.0858896	0.0490798	0.0674847	0.00613497	0.0306748	0.9918	1.0029	1.0302	0.5397	6.1013	0.0214	1.8438	0.1411	1.0014	3.2904	0.1668	0.6641	1146	0.280105	0.190227	0.280977	0.248691	0.561082	0.471204	0.0593368	0.0471204	0.0951134	0.0619546
NP001018494_NM018394	9698	PUM1	PUM1	NP001018494.1	1188	126679	0.0984848	0.010101	0.043771	0.0395623	0.0328283	0.0976431	0.0294613	0.0328283	0.0345118	0.0833333	0.0210438	0.0505051	0.0673401	0.0824916	0.0395623	0.0984848	0.0395623	0.0648148	0.00505051	0.0286195	0.985	0.9743	1.0509	0.5224	5.9804	-0.0092	1.4803	0.1035	1.0041	3.0287	0.1607	0.5785	921	0.270358	0.217155	0.248643	0.263844	0.519001	0.465798	0.0597177	0.0499457	0.0749186	0.0662324
NP001018494_NM024527	9698	PUM1	PUM1	NP001018494.1	1188	126679	0.0984848	0.010101	0.043771	0.0395623	0.0328283	0.0976431	0.0294613	0.0328283	0.0345118	0.0833333	0.0210438	0.0505051	0.0673401	0.0824916	0.0395623	0.0984848	0.0395623	0.0648148	0.00505051	0.0286195	0.985	0.9743	1.0509	0.5224	5.9804	-0.0092	1.4803	0.1035	1.0041	3.0287	0.1607	0.5785	1320	0.178788	0.325758	0.315152	0.180303	0.493939	0.640909	0.0280303	0.0439394	0.0666667	0.0371212
NP001018494_NM006720	9698	PUM1	PUM1	NP001018494.1	1188	126679	0.0984848	0.010101	0.043771	0.0395623	0.0328283	0.0976431	0.0294613	0.0328283	0.0345118	0.0833333	0.0210438	0.0505051	0.0673401	0.0824916	0.0395623	0.0984848	0.0395623	0.0648148	0.00505051	0.0286195	0.985	0.9743	1.0509	0.5224	5.9804	-0.0092	1.4803	0.1035	1.0041	3.0287	0.1607	0.5785	1368	0.284357	0.261696	0.23538	0.218567	0.519737	0.497076	0.0548246	0.0599415	0.0884503	0.0628655
NP001018494_NM001042473	9698	PUM1	PUM1	NP001018494.1	1188	126679	0.0984848	0.010101	0.043771	0.0395623	0.0328283	0.0976431	0.0294613	0.0328283	0.0345118	0.0833333	0.0210438	0.0505051	0.0673401	0.0824916	0.0395623	0.0984848	0.0395623	0.0648148	0.00505051	0.0286195	0.985	0.9743	1.0509	0.5224	5.9804	-0.0092	1.4803	0.1035	1.0041	3.0287	0.1607	0.5785	1473	0.321792	0.178547	0.266802	0.232858	0.588595	0.44535	0.0814664	0.0475221	0.0909708	0.0767142
NP001018494_NM001033583	9698	PUM1	PUM1	NP001018494.1	1188	126679	0.0984848	0.010101	0.043771	0.0395623	0.0328283	0.0976431	0.0294613	0.0328283	0.0345118	0.0833333	0.0210438	0.0505051	0.0673401	0.0824916	0.0395623	0.0984848	0.0395623	0.0648148	0.00505051	0.0286195	0.985	0.9743	1.0509	0.5224	5.9804	-0.0092	1.4803	0.1035	1.0041	3.0287	0.1607	0.5785	1320	0.281818	0.199242	0.255303	0.263636	0.537121	0.454545	0.0621212	0.0484848	0.0863636	0.0659091
NP001018494_NM001040135	9698	PUM1	PUM1	NP001018494.1	1188	126679	0.0984848	0.010101	0.043771	0.0395623	0.0328283	0.0976431	0.0294613	0.0328283	0.0345118	0.0833333	0.0210438	0.0505051	0.0673401	0.0824916	0.0395623	0.0984848	0.0395623	0.0648148	0.00505051	0.0286195	0.985	0.9743	1.0509	0.5224	5.9804	-0.0092	1.4803	0.1035	1.0041	3.0287	0.1607	0.5785	1047	0.280802	0.22063	0.251194	0.247373	0.531996	0.471824	0.0534862	0.0573066	0.0821394	0.0744986
NP001018494_NM024551	9698	PUM1	PUM1	NP001018494.1	1188	126679	0.0984848	0.010101	0.043771	0.0395623	0.0328283	0.0976431	0.0294613	0.0328283	0.0345118	0.0833333	0.0210438	0.0505051	0.0673401	0.0824916	0.0395623	0.0984848	0.0395623	0.0648148	0.00505051	0.0286195	0.985	0.9743	1.0509	0.5224	5.9804	-0.0092	1.4803	0.1035	1.0041	3.0287	0.1607	0.5785	1161	0.225668	0.235142	0.242033	0.297158	0.4677	0.477175	0.039621	0.042205	0.0628768	0.0697674
NP001018494_NM181442	9698	PUM1	PUM1	NP001018494.1	1188	126679	0.0984848	0.010101	0.043771	0.0395623	0.0328283	0.0976431	0.0294613	0.0328283	0.0345118	0.0833333	0.0210438	0.0505051	0.0673401	0.0824916	0.0395623	0.0984848	0.0395623	0.0648148	0.00505051	0.0286195	0.985	0.9743	1.0509	0.5224	5.9804	-0.0092	1.4803	0.1035	1.0041	3.0287	0.1607	0.5785	3309	0.31641	0.220913	0.216984	0.245694	0.533394	0.437897	0.0815956	0.0565125	0.0828045	0.0643699
NP001018494_NM001126	9698	PUM1	PUM1	NP001018494.1	1188	126679	0.0984848	0.010101	0.043771	0.0395623	0.0328283	0.0976431	0.0294613	0.0328283	0.0345118	0.0833333	0.0210438	0.0505051	0.0673401	0.0824916	0.0395623	0.0984848	0.0395623	0.0648148	0.00505051	0.0286195	0.985	0.9743	1.0509	0.5224	5.9804	-0.0092	1.4803	0.1035	1.0041	3.0287	0.1607	0.5785	1371	0.304887	0.175784	0.250182	0.269147	0.555069	0.425966	0.0780452	0.0495988	0.0671043	0.0765864
NP001018494_NM001029882	9698	PUM1	PUM1	NP001018494.1	1188	126679	0.0984848	0.010101	0.043771	0.0395623	0.0328283	0.0976431	0.0294613	0.0328283	0.0345118	0.0833333	0.0210438	0.0505051	0.0673401	0.0824916	0.0395623	0.0984848	0.0395623	0.0648148	0.00505051	0.0286195	0.985	0.9743	1.0509	0.5224	5.9804	-0.0092	1.4803	0.1035	1.0041	3.0287	0.1607	0.5785	4812	0.178096	0.369493	0.29655	0.15586	0.474647	0.666043	0.0253533	0.0581879	0.0729426	0.0172485
NP001018494_NM144767	9698	PUM1	PUM1	NP001018494.1	1188	126679	0.0984848	0.010101	0.043771	0.0395623	0.0328283	0.0976431	0.0294613	0.0328283	0.0345118	0.0833333	0.0210438	0.0505051	0.0673401	0.0824916	0.0395623	0.0984848	0.0395623	0.0648148	0.00505051	0.0286195	0.985	0.9743	1.0509	0.5224	5.9804	-0.0092	1.4803	0.1035	1.0041	3.0287	0.1607	0.5785	3177	0.312244	0.215612	0.27101	0.201133	0.583255	0.486623	0.0730249	0.0440667	0.118351	0.0509915
NP001018494_NM016201	9698	PUM1	PUM1	NP001018494.1	1188	126679	0.0984848	0.010101	0.043771	0.0395623	0.0328283	0.0976431	0.0294613	0.0328283	0.0345118	0.0833333	0.0210438	0.0505051	0.0673401	0.0824916	0.0395623	0.0984848	0.0395623	0.0648148	0.00505051	0.0286195	0.985	0.9743	1.0509	0.5224	5.9804	-0.0092	1.4803	0.1035	1.0041	3.0287	0.1607	0.5785	2343	0.22023	0.314981	0.325224	0.139565	0.545455	0.640205	0.0251814	0.0482288	0.116944	0.0251814
NP001018494_NM144567	9698	PUM1	PUM1	NP001018494.1	1188	126679	0.0984848	0.010101	0.043771	0.0395623	0.0328283	0.0976431	0.0294613	0.0328283	0.0345118	0.0833333	0.0210438	0.0505051	0.0673401	0.0824916	0.0395623	0.0984848	0.0395623	0.0648148	0.00505051	0.0286195	0.985	0.9743	1.0509	0.5224	5.9804	-0.0092	1.4803	0.1035	1.0041	3.0287	0.1607	0.5785	1635	0.293578	0.204281	0.223242	0.278899	0.51682	0.427523	0.0642202	0.0617737	0.0752294	0.0691131
NP001018494_NM052855	9698	PUM1	PUM1	NP001018494.1	1188	126679	0.0984848	0.010101	0.043771	0.0395623	0.0328283	0.0976431	0.0294613	0.0328283	0.0345118	0.0833333	0.0210438	0.0505051	0.0673401	0.0824916	0.0395623	0.0984848	0.0395623	0.0648148	0.00505051	0.0286195	0.985	0.9743	1.0509	0.5224	5.9804	-0.0092	1.4803	0.1035	1.0041	3.0287	0.1607	0.5785	1107	0.278229	0.250226	0.246612	0.224932	0.524842	0.496838	0.063234	0.0560072	0.0858175	0.0542005
NP001018494_NM006401	9698	PUM1	PUM1	NP001018494.1	1188	126679	0.0984848	0.010101	0.043771	0.0395623	0.0328283	0.0976431	0.0294613	0.0328283	0.0345118	0.0833333	0.0210438	0.0505051	0.0673401	0.0824916	0.0395623	0.0984848	0.0395623	0.0648148	0.00505051	0.0286195	0.985	0.9743	1.0509	0.5224	5.9804	-0.0092	1.4803	0.1035	1.0041	3.0287	0.1607	0.5785	756	0.353175	0.14418	0.294974	0.207672	0.648148	0.439153	0.0939153	0.047619	0.115079	0.0648148
NP001018494_NM001284	9698	PUM1	PUM1	NP001018494.1	1188	126679	0.0984848	0.010101	0.043771	0.0395623	0.0328283	0.0976431	0.0294613	0.0328283	0.0345118	0.0833333	0.0210438	0.0505051	0.0673401	0.0824916	0.0395623	0.0984848	0.0395623	0.0648148	0.00505051	0.0286195	0.985	0.9743	1.0509	0.5224	5.9804	-0.0092	1.4803	0.1035	1.0041	3.0287	0.1607	0.5785	582	0.329897	0.168385	0.213058	0.28866	0.542955	0.381443	0.0841924	0.0446735	0.0687285	0.0996564
NP001018494_NM001657	9698	PUM1	PUM1	NP001018494.1	1188	126679	0.0984848	0.010101	0.043771	0.0395623	0.0328283	0.0976431	0.0294613	0.0328283	0.0345118	0.0833333	0.0210438	0.0505051	0.0673401	0.0824916	0.0395623	0.0984848	0.0395623	0.0648148	0.00505051	0.0286195	0.985	0.9743	1.0509	0.5224	5.9804	-0.0092	1.4803	0.1035	1.0041	3.0287	0.1607	0.5785	759	0.339921	0.194993	0.239789	0.225296	0.57971	0.434783	0.0869565	0.0513834	0.088274	0.0737813
NP001018494_NM001658	9698	PUM1	PUM1	NP001018494.1	1188	126679	0.0984848	0.010101	0.043771	0.0395623	0.0328283	0.0976431	0.0294613	0.0328283	0.0345118	0.0833333	0.0210438	0.0505051	0.0673401	0.0824916	0.0395623	0.0984848	0.0395623	0.0648148	0.00505051	0.0286195	0.985	0.9743	1.0509	0.5224	5.9804	-0.0092	1.4803	0.1035	1.0041	3.0287	0.1607	0.5785	546	0.247253	0.283883	0.291209	0.177656	0.538462	0.575092	0.0531136	0.0750916	0.0677656	0.0421245
NP001018494_NM153213	9698	PUM1	PUM1	NP001018494.1	1188	126679	0.0984848	0.010101	0.043771	0.0395623	0.0328283	0.0976431	0.0294613	0.0328283	0.0345118	0.0833333	0.0210438	0.0505051	0.0673401	0.0824916	0.0395623	0.0984848	0.0395623	0.0648148	0.00505051	0.0286195	0.985	0.9743	1.0509	0.5224	5.9804	-0.0092	1.4803	0.1035	1.0041	3.0287	0.1607	0.5785	2409	0.192196	0.316729	0.32171	0.169365	0.513906	0.638439	0.0261519	0.0444168	0.0963055	0.022831
NP001018494_NM001113513	9698	PUM1	PUM1	NP001018494.1	1188	126679	0.0984848	0.010101	0.043771	0.0395623	0.0328283	0.0976431	0.0294613	0.0328283	0.0345118	0.0833333	0.0210438	0.0505051	0.0673401	0.0824916	0.0395623	0.0984848	0.0395623	0.0648148	0.00505051	0.0286195	0.985	0.9743	1.0509	0.5224	5.9804	-0.0092	1.4803	0.1035	1.0041	3.0287	0.1607	0.5785	1941	0.312725	0.251417	0.238022	0.197836	0.550747	0.489438	0.0793405	0.0587326	0.0906749	0.0551262
NP001018494_NM031371	9698	PUM1	PUM1	NP001018494.1	1188	126679	0.0984848	0.010101	0.043771	0.0395623	0.0328283	0.0976431	0.0294613	0.0328283	0.0345118	0.0833333	0.0210438	0.0505051	0.0673401	0.0824916	0.0395623	0.0984848	0.0395623	0.0648148	0.00505051	0.0286195	0.985	0.9743	1.0509	0.5224	5.9804	-0.0092	1.4803	0.1035	1.0041	3.0287	0.1607	0.5785	3681	0.384406	0.168432	0.223309	0.223852	0.607715	0.391741	0.108938	0.0499864	0.105134	0.0717196
NP001018494_NM138795	9698	PUM1	PUM1	NP001018494.1	1188	126679	0.0984848	0.010101	0.043771	0.0395623	0.0328283	0.0976431	0.0294613	0.0328283	0.0345118	0.0833333	0.0210438	0.0505051	0.0673401	0.0824916	0.0395623	0.0984848	0.0395623	0.0648148	0.00505051	0.0286195	0.985	0.9743	1.0509	0.5224	5.9804	-0.0092	1.4803	0.1035	1.0041	3.0287	0.1607	0.5785	561	0.263815	0.251337	0.279857	0.204991	0.543672	0.531194	0.0552585	0.0659537	0.0784314	0.0516934
NP001018494_NM018184	9698	PUM1	PUM1	NP001018494.1	1188	126679	0.0984848	0.010101	0.043771	0.0395623	0.0328283	0.0976431	0.0294613	0.0328283	0.0345118	0.0833333	0.0210438	0.0505051	0.0673401	0.0824916	0.0395623	0.0984848	0.0395623	0.0648148	0.00505051	0.0286195	0.985	0.9743	1.0509	0.5224	5.9804	-0.0092	1.4803	0.1035	1.0041	3.0287	0.1607	0.5785	561	0.311943	0.196078	0.242424	0.249554	0.554367	0.438503	0.0766488	0.0409982	0.0855615	0.083779
NP001018494_NM014034	9698	PUM1	PUM1	NP001018494.1	1188	126679	0.0984848	0.010101	0.043771	0.0395623	0.0328283	0.0976431	0.0294613	0.0328283	0.0345118	0.0833333	0.0210438	0.0505051	0.0673401	0.0824916	0.0395623	0.0984848	0.0395623	0.0648148	0.00505051	0.0286195	0.985	0.9743	1.0509	0.5224	5.9804	-0.0092	1.4803	0.1035	1.0041	3.0287	0.1607	0.5785	508	0.334646	0.185039	0.208661	0.271654	0.543307	0.393701	0.0807087	0.0551181	0.0807087	0.0925197
NP001018494_NM032810	9698	PUM1	PUM1	NP001018494.1	1188	126679	0.0984848	0.010101	0.043771	0.0395623	0.0328283	0.0976431	0.0294613	0.0328283	0.0345118	0.0833333	0.0210438	0.0505051	0.0673401	0.0824916	0.0395623	0.0984848	0.0395623	0.0648148	0.00505051	0.0286195	0.985	0.9743	1.0509	0.5224	5.9804	-0.0092	1.4803	0.1035	1.0041	3.0287	0.1607	0.5785	1086	0.315838	0.192449	0.219153	0.27256	0.534991	0.411602	0.0773481	0.0423573	0.0791897	0.0837937
NP001018494_NM024524	9698	PUM1	PUM1	NP001018494.1	1188	126679	0.0984848	0.010101	0.043771	0.0395623	0.0328283	0.0976431	0.0294613	0.0328283	0.0345118	0.0833333	0.0210438	0.0505051	0.0673401	0.0824916	0.0395623	0.0984848	0.0395623	0.0648148	0.00505051	0.0286195	0.985	0.9743	1.0509	0.5224	5.9804	-0.0092	1.4803	0.1035	1.0041	3.0287	0.1607	0.5785	3681	0.287694	0.187177	0.215974	0.309155	0.503667	0.403151	0.0679163	0.0480848	0.062483	0.0825863
NP001018494_NM001693	9698	PUM1	PUM1	NP001018494.1	1188	126679	0.0984848	0.010101	0.043771	0.0395623	0.0328283	0.0976431	0.0294613	0.0328283	0.0345118	0.0833333	0.0210438	0.0505051	0.0673401	0.0824916	0.0395623	0.0984848	0.0395623	0.0648148	0.00505051	0.0286195	0.985	0.9743	1.0509	0.5224	5.9804	-0.0092	1.4803	0.1035	1.0041	3.0287	0.1607	0.5785	1536	0.265625	0.226562	0.253906	0.253906	0.519531	0.480469	0.0546875	0.0533854	0.0703125	0.0722656
NP001018494_NM004888	9698	PUM1	PUM1	NP001018494.1	1188	126679	0.0984848	0.010101	0.043771	0.0395623	0.0328283	0.0976431	0.0294613	0.0328283	0.0345118	0.0833333	0.0210438	0.0505051	0.0673401	0.0824916	0.0395623	0.0984848	0.0395623	0.0648148	0.00505051	0.0286195	0.985	0.9743	1.0509	0.5224	5.9804	-0.0092	1.4803	0.1035	1.0041	3.0287	0.1607	0.5785	357	0.305322	0.226891	0.308123	0.159664	0.613445	0.535014	0.0756303	0.0392157	0.123249	0.0448179
NP001018494_NM006045	9698	PUM1	PUM1	NP001018494.1	1188	126679	0.0984848	0.010101	0.043771	0.0395623	0.0328283	0.0976431	0.0294613	0.0328283	0.0345118	0.0833333	0.0210438	0.0505051	0.0673401	0.0824916	0.0395623	0.0984848	0.0395623	0.0648148	0.00505051	0.0286195	0.985	0.9743	1.0509	0.5224	5.9804	-0.0092	1.4803	0.1035	1.0041	3.0287	0.1607	0.5785	3144	0.221374	0.277354	0.277036	0.224237	0.49841	0.554389	0.038486	0.0585242	0.0702926	0.0464377
NP001018494_NM001098833	9698	PUM1	PUM1	NP001018494.1	1188	126679	0.0984848	0.010101	0.043771	0.0395623	0.0328283	0.0976431	0.0294613	0.0328283	0.0345118	0.0833333	0.0210438	0.0505051	0.0673401	0.0824916	0.0395623	0.0984848	0.0395623	0.0648148	0.00505051	0.0286195	0.985	0.9743	1.0509	0.5224	5.9804	-0.0092	1.4803	0.1035	1.0041	3.0287	0.1607	0.5785	1044	0.277778	0.255747	0.262452	0.204023	0.54023	0.518199	0.0680077	0.0584291	0.0804598	0.0565134
NP001018494_NM181050	9698	PUM1	PUM1	NP001018494.1	1188	126679	0.0984848	0.010101	0.043771	0.0395623	0.0328283	0.0976431	0.0294613	0.0328283	0.0345118	0.0833333	0.0210438	0.0505051	0.0673401	0.0824916	0.0395623	0.0984848	0.0395623	0.0648148	0.00505051	0.0286195	0.985	0.9743	1.0509	0.5224	5.9804	-0.0092	1.4803	0.1035	1.0041	3.0287	0.1607	0.5785	2481	0.226522	0.29867	0.320032	0.154776	0.546554	0.618702	0.0358726	0.0548166	0.0959291	0.0326481
NP001018494_NM001497	9698	PUM1	PUM1	NP001018494.1	1188	126679	0.0984848	0.010101	0.043771	0.0395623	0.0328283	0.0976431	0.0294613	0.0328283	0.0345118	0.0833333	0.0210438	0.0505051	0.0673401	0.0824916	0.0395623	0.0984848	0.0395623	0.0648148	0.00505051	0.0286195	0.985	0.9743	1.0509	0.5224	5.9804	-0.0092	1.4803	0.1035	1.0041	3.0287	0.1607	0.5785	1197	0.212197	0.300752	0.261487	0.225564	0.473684	0.562239	0.0367586	0.0559733	0.059315	0.053467
NP001018494_NM004776	9698	PUM1	PUM1	NP001018494.1	1188	126679	0.0984848	0.010101	0.043771	0.0395623	0.0328283	0.0976431	0.0294613	0.0328283	0.0345118	0.0833333	0.0210438	0.0505051	0.0673401	0.0824916	0.0395623	0.0984848	0.0395623	0.0648148	0.00505051	0.0286195	0.985	0.9743	1.0509	0.5224	5.9804	-0.0092	1.4803	0.1035	1.0041	3.0287	0.1607	0.5785	1167	0.253642	0.255356	0.239075	0.251928	0.492716	0.49443	0.059126	0.0616967	0.0582691	0.059126
NP001018494_NM001186	9698	PUM1	PUM1	NP001018494.1	1188	126679	0.0984848	0.010101	0.043771	0.0395623	0.0328283	0.0976431	0.0294613	0.0328283	0.0345118	0.0833333	0.0210438	0.0505051	0.0673401	0.0824916	0.0395623	0.0984848	0.0395623	0.0648148	0.00505051	0.0286195	0.985	0.9743	1.0509	0.5224	5.9804	-0.0092	1.4803	0.1035	1.0041	3.0287	0.1607	0.5785	2211	0.307101	0.205337	0.233831	0.253731	0.540932	0.439168	0.0759837	0.0560832	0.0881954	0.0569878
NP001018494_NM001127242	9698	PUM1	PUM1	NP001018494.1	1188	126679	0.0984848	0.010101	0.043771	0.0395623	0.0328283	0.0976431	0.0294613	0.0328283	0.0345118	0.0833333	0.0210438	0.0505051	0.0673401	0.0824916	0.0395623	0.0984848	0.0395623	0.0648148	0.00505051	0.0286195	0.985	0.9743	1.0509	0.5224	5.9804	-0.0092	1.4803	0.1035	1.0041	3.0287	0.1607	0.5785	306	0.179739	0.343137	0.303922	0.173203	0.48366	0.647059	0.0130719	0.0555556	0.0686275	0.0392157
NP001018494_NM003567	9698	PUM1	PUM1	NP001018494.1	1188	126679	0.0984848	0.010101	0.043771	0.0395623	0.0328283	0.0976431	0.0294613	0.0328283	0.0345118	0.0833333	0.0210438	0.0505051	0.0673401	0.0824916	0.0395623	0.0984848	0.0395623	0.0648148	0.00505051	0.0286195	0.985	0.9743	1.0509	0.5224	5.9804	-0.0092	1.4803	0.1035	1.0041	3.0287	0.1607	0.5785	2478	0.25222	0.290557	0.271186	0.186037	0.523406	0.561743	0.0516546	0.0577078	0.0839387	0.0423729
NP001018494_NM005872	9698	PUM1	PUM1	NP001018494.1	1188	126679	0.0984848	0.010101	0.043771	0.0395623	0.0328283	0.0976431	0.0294613	0.0328283	0.0345118	0.0833333	0.0210438	0.0505051	0.0673401	0.0824916	0.0395623	0.0984848	0.0395623	0.0648148	0.00505051	0.0286195	0.985	0.9743	1.0509	0.5224	5.9804	-0.0092	1.4803	0.1035	1.0041	3.0287	0.1607	0.5785	678	0.337758	0.185841	0.244838	0.231563	0.582596	0.430678	0.0899705	0.0530973	0.0781711	0.0811209
NP001018494_NM003921	9698	PUM1	PUM1	NP001018494.1	1188	126679	0.0984848	0.010101	0.043771	0.0395623	0.0328283	0.0976431	0.0294613	0.0328283	0.0345118	0.0833333	0.0210438	0.0505051	0.0673401	0.0824916	0.0395623	0.0984848	0.0395623	0.0648148	0.00505051	0.0286195	0.985	0.9743	1.0509	0.5224	5.9804	-0.0092	1.4803	0.1035	1.0041	3.0287	0.1607	0.5785	702	0.337607	0.220798	0.19943	0.242165	0.537037	0.420228	0.0883191	0.0769231	0.0840456	0.0541311
NP001018494_NM005178	9698	PUM1	PUM1	NP001018494.1	1188	126679	0.0984848	0.010101	0.043771	0.0395623	0.0328283	0.0976431	0.0294613	0.0328283	0.0345118	0.0833333	0.0210438	0.0505051	0.0673401	0.0824916	0.0395623	0.0984848	0.0395623	0.0648148	0.00505051	0.0286195	0.985	0.9743	1.0509	0.5224	5.9804	-0.0092	1.4803	0.1035	1.0041	3.0287	0.1607	0.5785	1365	0.152381	0.409524	0.279121	0.158974	0.431502	0.688645	0.0190476	0.0593407	0.0454212	0.025641
NP001018494_NM001134738	9698	PUM1	PUM1	NP001018494.1	1188	126679	0.0984848	0.010101	0.043771	0.0395623	0.0328283	0.0976431	0.0294613	0.0328283	0.0345118	0.0833333	0.0210438	0.0505051	0.0673401	0.0824916	0.0395623	0.0984848	0.0395623	0.0648148	0.00505051	0.0286195	0.985	0.9743	1.0509	0.5224	5.9804	-0.0092	1.4803	0.1035	1.0041	3.0287	0.1607	0.5785	1953	0.235023	0.323605	0.243728	0.197645	0.478751	0.567332	0.0430108	0.0578597	0.0803891	0.0440348
NP001018494_NM018429	9698	PUM1	PUM1	NP001018494.1	1188	126679	0.0984848	0.010101	0.043771	0.0395623	0.0328283	0.0976431	0.0294613	0.0328283	0.0345118	0.0833333	0.0210438	0.0505051	0.0673401	0.0824916	0.0395623	0.0984848	0.0395623	0.0648148	0.00505051	0.0286195	0.985	0.9743	1.0509	0.5224	5.9804	-0.0092	1.4803	0.1035	1.0041	3.0287	0.1607	0.5785	7875	0.371937	0.176889	0.230857	0.220317	0.602794	0.407746	0.103746	0.0499048	0.107556	0.0675556
NP001018494_NM001167821	9698	PUM1	PUM1	NP001018494.1	1188	126679	0.0984848	0.010101	0.043771	0.0395623	0.0328283	0.0976431	0.0294613	0.0328283	0.0345118	0.0833333	0.0210438	0.0505051	0.0673401	0.0824916	0.0395623	0.0984848	0.0395623	0.0648148	0.00505051	0.0286195	0.985	0.9743	1.0509	0.5224	5.9804	-0.0092	1.4803	0.1035	1.0041	3.0287	0.1607	0.5785	264	0.147727	0.352273	0.219697	0.280303	0.367424	0.57197	0.030303	0.0340909	0.030303	0.0454545
NP001018494_NM173809	9698	PUM1	PUM1	NP001018494.1	1188	126679	0.0984848	0.010101	0.043771	0.0395623	0.0328283	0.0976431	0.0294613	0.0328283	0.0345118	0.0833333	0.0210438	0.0505051	0.0673401	0.0824916	0.0395623	0.0984848	0.0395623	0.0648148	0.00505051	0.0286195	0.985	0.9743	1.0509	0.5224	5.9804	-0.0092	1.4803	0.1035	1.0041	3.0287	0.1607	0.5785	429	0.317016	0.216783	0.272727	0.193473	0.589744	0.48951	0.0722611	0.0559441	0.0932401	0.0629371
NP001018494_NM005180	9698	PUM1	PUM1	NP001018494.1	1188	126679	0.0984848	0.010101	0.043771	0.0395623	0.0328283	0.0976431	0.0294613	0.0328283	0.0345118	0.0833333	0.0210438	0.0505051	0.0673401	0.0824916	0.0395623	0.0984848	0.0395623	0.0648148	0.00505051	0.0286195	0.985	0.9743	1.0509	0.5224	5.9804	-0.0092	1.4803	0.1035	1.0041	3.0287	0.1607	0.5785	981	0.330275	0.201835	0.207951	0.259939	0.538226	0.409786	0.0784913	0.058104	0.0835882	0.0866463
NP001018494_NM001200	9698	PUM1	PUM1	NP001018494.1	1188	126679	0.0984848	0.010101	0.043771	0.0395623	0.0328283	0.0976431	0.0294613	0.0328283	0.0345118	0.0833333	0.0210438	0.0505051	0.0673401	0.0824916	0.0395623	0.0984848	0.0395623	0.0648148	0.00505051	0.0286195	0.985	0.9743	1.0509	0.5224	5.9804	-0.0092	1.4803	0.1035	1.0041	3.0287	0.1607	0.5785	1191	0.248531	0.264484	0.267003	0.219983	0.515533	0.531486	0.054576	0.0604534	0.0738875	0.0445004
NP001018494_NM004329	9698	PUM1	PUM1	NP001018494.1	1188	126679	0.0984848	0.010101	0.043771	0.0395623	0.0328283	0.0976431	0.0294613	0.0328283	0.0345118	0.0833333	0.0210438	0.0505051	0.0673401	0.0824916	0.0395623	0.0984848	0.0395623	0.0648148	0.00505051	0.0286195	0.985	0.9743	1.0509	0.5224	5.9804	-0.0092	1.4803	0.1035	1.0041	3.0287	0.1607	0.5785	1599	0.292683	0.213884	0.228893	0.26454	0.521576	0.442777	0.0644153	0.0550344	0.0644153	0.0819262
NP001018494_NM004330	9698	PUM1	PUM1	NP001018494.1	1188	126679	0.0984848	0.010101	0.043771	0.0395623	0.0328283	0.0976431	0.0294613	0.0328283	0.0345118	0.0833333	0.0210438	0.0505051	0.0673401	0.0824916	0.0395623	0.0984848	0.0395623	0.0648148	0.00505051	0.0286195	0.985	0.9743	1.0509	0.5224	5.9804	-0.0092	1.4803	0.1035	1.0041	3.0287	0.1607	0.5785	1308	0.291284	0.20948	0.263761	0.235474	0.555046	0.473242	0.0695719	0.0512232	0.0733945	0.07263
NP001018494_NM014299	9698	PUM1	PUM1	NP001018494.1	1188	126679	0.0984848	0.010101	0.043771	0.0395623	0.0328283	0.0976431	0.0294613	0.0328283	0.0345118	0.0833333	0.0210438	0.0505051	0.0673401	0.0824916	0.0395623	0.0984848	0.0395623	0.0648148	0.00505051	0.0286195	0.985	0.9743	1.0509	0.5224	5.9804	-0.0092	1.4803	0.1035	1.0041	3.0287	0.1607	0.5785	2169	0.288151	0.308437	0.248963	0.154449	0.537114	0.5574	0.0682342	0.0627017	0.0982019	0.0359613
NP001018494_NM013263	9698	PUM1	PUM1	NP001018494.1	1188	126679	0.0984848	0.010101	0.043771	0.0395623	0.0328283	0.0976431	0.0294613	0.0328283	0.0345118	0.0833333	0.0210438	0.0505051	0.0673401	0.0824916	0.0395623	0.0984848	0.0395623	0.0648148	0.00505051	0.0286195	0.985	0.9743	1.0509	0.5224	5.9804	-0.0092	1.4803	0.1035	1.0041	3.0287	0.1607	0.5785	1956	0.345092	0.199898	0.24591	0.2091	0.591002	0.445808	0.0879346	0.0603272	0.107362	0.0593047
NP001018494_NM004634	9698	PUM1	PUM1	NP001018494.1	1188	126679	0.0984848	0.010101	0.043771	0.0395623	0.0328283	0.0976431	0.0294613	0.0328283	0.0345118	0.0833333	0.0210438	0.0505051	0.0673401	0.0824916	0.0395623	0.0984848	0.0395623	0.0648148	0.00505051	0.0286195	0.985	0.9743	1.0509	0.5224	5.9804	-0.0092	1.4803	0.1035	1.0041	3.0287	0.1607	0.5785	3645	0.254595	0.286694	0.28834	0.17037	0.542936	0.575034	0.0474623	0.0631001	0.0960219	0.0381344
NP001018494_NM153252	9698	PUM1	PUM1	NP001018494.1	1188	126679	0.0984848	0.010101	0.043771	0.0395623	0.0328283	0.0976431	0.0294613	0.0328283	0.0345118	0.0833333	0.0210438	0.0505051	0.0673401	0.0824916	0.0395623	0.0984848	0.0395623	0.0648148	0.00505051	0.0286195	0.985	0.9743	1.0509	0.5224	5.9804	-0.0092	1.4803	0.1035	1.0041	3.0287	0.1607	0.5785	5409	0.312627	0.190423	0.24071	0.25624	0.553337	0.431133	0.0696987	0.0517656	0.0891107	0.0774635
NP001018494_NM181443	9698	PUM1	PUM1	NP001018494.1	1188	126679	0.0984848	0.010101	0.043771	0.0395623	0.0328283	0.0976431	0.0294613	0.0328283	0.0345118	0.0833333	0.0210438	0.0505051	0.0673401	0.0824916	0.0395623	0.0984848	0.0395623	0.0648148	0.00505051	0.0286195	0.985	0.9743	1.0509	0.5224	5.9804	-0.0092	1.4803	0.1035	1.0041	3.0287	0.1607	0.5785	1386	0.256133	0.239538	0.251082	0.253247	0.507215	0.49062	0.0505051	0.0512266	0.0772006	0.0591631
NP001018494_NM018167	9698	PUM1	PUM1	NP001018494.1	1188	126679	0.0984848	0.010101	0.043771	0.0395623	0.0328283	0.0976431	0.0294613	0.0328283	0.0345118	0.0833333	0.0210438	0.0505051	0.0673401	0.0824916	0.0395623	0.0984848	0.0395623	0.0648148	0.00505051	0.0286195	0.985	0.9743	1.0509	0.5224	5.9804	-0.0092	1.4803	0.1035	1.0041	3.0287	0.1607	0.5785	1233	0.290349	0.203569	0.222222	0.283861	0.512571	0.425791	0.0632603	0.053528	0.0762368	0.0762368
NP001018494_NM001007793	9698	PUM1	PUM1	NP001018494.1	1188	126679	0.0984848	0.010101	0.043771	0.0395623	0.0328283	0.0976431	0.0294613	0.0328283	0.0345118	0.0833333	0.0210438	0.0505051	0.0673401	0.0824916	0.0395623	0.0984848	0.0395623	0.0648148	0.00505051	0.0286195	0.985	0.9743	1.0509	0.5224	5.9804	-0.0092	1.4803	0.1035	1.0041	3.0287	0.1607	0.5785	981	0.276249	0.246687	0.236493	0.240571	0.512742	0.48318	0.0611621	0.0611621	0.0652396	0.0723751
NP001018494_NM024834	9698	PUM1	PUM1	NP001018494.1	1188	126679	0.0984848	0.010101	0.043771	0.0395623	0.0328283	0.0976431	0.0294613	0.0328283	0.0345118	0.0833333	0.0210438	0.0505051	0.0673401	0.0824916	0.0395623	0.0984848	0.0395623	0.0648148	0.00505051	0.0286195	0.985	0.9743	1.0509	0.5224	5.9804	-0.0092	1.4803	0.1035	1.0041	3.0287	0.1607	0.5785	1929	0.286159	0.219285	0.229653	0.264904	0.515811	0.448937	0.0673924	0.0554692	0.0767237	0.0684292
NP001018494_NM153810	9698	PUM1	PUM1	NP001018494.1	1188	126679	0.0984848	0.010101	0.043771	0.0395623	0.0328283	0.0976431	0.0294613	0.0328283	0.0345118	0.0833333	0.0210438	0.0505051	0.0673401	0.0824916	0.0395623	0.0984848	0.0395623	0.0648148	0.00505051	0.0286195	0.985	0.9743	1.0509	0.5224	5.9804	-0.0092	1.4803	0.1035	1.0041	3.0287	0.1607	0.5785	1110	0.278378	0.246847	0.248649	0.226126	0.527027	0.495495	0.0585586	0.0504505	0.0783784	0.0747748
NP001018494_NM001009894	9698	PUM1	PUM1	NP001018494.1	1188	126679	0.0984848	0.010101	0.043771	0.0395623	0.0328283	0.0976431	0.0294613	0.0328283	0.0345118	0.0833333	0.0210438	0.0505051	0.0673401	0.0824916	0.0395623	0.0984848	0.0395623	0.0648148	0.00505051	0.0286195	0.985	0.9743	1.0509	0.5224	5.9804	-0.0092	1.4803	0.1035	1.0041	3.0287	0.1607	0.5785	978	0.347648	0.176892	0.204499	0.270961	0.552147	0.381391	0.093047	0.0541922	0.0664622	0.0899796
NP001018494_NM017822	9698	PUM1	PUM1	NP001018494.1	1188	126679	0.0984848	0.010101	0.043771	0.0395623	0.0328283	0.0976431	0.0294613	0.0328283	0.0345118	0.0833333	0.0210438	0.0505051	0.0673401	0.0824916	0.0395623	0.0984848	0.0395623	0.0648148	0.00505051	0.0286195	0.985	0.9743	1.0509	0.5224	5.9804	-0.0092	1.4803	0.1035	1.0041	3.0287	0.1607	0.5785	1479	0.263692	0.236646	0.258283	0.241379	0.521974	0.494929	0.0534145	0.0466531	0.0878972	0.0615281
NP001018494_NM170719	9698	PUM1	PUM1	NP001018494.1	1188	126679	0.0984848	0.010101	0.043771	0.0395623	0.0328283	0.0976431	0.0294613	0.0328283	0.0345118	0.0833333	0.0210438	0.0505051	0.0673401	0.0824916	0.0395623	0.0984848	0.0395623	0.0648148	0.00505051	0.0286195	0.985	0.9743	1.0509	0.5224	5.9804	-0.0092	1.4803	0.1035	1.0041	3.0287	0.1607	0.5785	2769	0.227158	0.319971	0.170098	0.282774	0.397255	0.490069	0.0491152	0.0577826	0.0530878	0.0556157
NP001018494_NM001083908	9698	PUM1	PUM1	NP001018494.1	1188	126679	0.0984848	0.010101	0.043771	0.0395623	0.0328283	0.0976431	0.0294613	0.0328283	0.0345118	0.0833333	0.0210438	0.0505051	0.0673401	0.0824916	0.0395623	0.0984848	0.0395623	0.0648148	0.00505051	0.0286195	0.985	0.9743	1.0509	0.5224	5.9804	-0.0092	1.4803	0.1035	1.0041	3.0287	0.1607	0.5785	2370	0.222363	0.287342	0.306751	0.183544	0.529114	0.594093	0.0447257	0.0493671	0.0751055	0.0371308
NP001018494_NM001043318	9698	PUM1	PUM1	NP001018494.1	1188	126679	0.0984848	0.010101	0.043771	0.0395623	0.0328283	0.0976431	0.0294613	0.0328283	0.0345118	0.0833333	0.0210438	0.0505051	0.0673401	0.0824916	0.0395623	0.0984848	0.0395623	0.0648148	0.00505051	0.0286195	0.985	0.9743	1.0509	0.5224	5.9804	-0.0092	1.4803	0.1035	1.0041	3.0287	0.1607	0.5785	3138	0.232632	0.320586	0.292862	0.15392	0.525494	0.613448	0.0442957	0.0509879	0.101338	0.029318
NP001018494_NM001142762	9698	PUM1	PUM1	NP001018494.1	1188	126679	0.0984848	0.010101	0.043771	0.0395623	0.0328283	0.0976431	0.0294613	0.0328283	0.0345118	0.0833333	0.0210438	0.0505051	0.0673401	0.0824916	0.0395623	0.0984848	0.0395623	0.0648148	0.00505051	0.0286195	0.985	0.9743	1.0509	0.5224	5.9804	-0.0092	1.4803	0.1035	1.0041	3.0287	0.1607	0.5785	726	0.282369	0.247934	0.275482	0.194215	0.557851	0.523416	0.0647383	0.0633609	0.106061	0.0247934
NP001018494_NM001160115	9698	PUM1	PUM1	NP001018494.1	1188	126679	0.0984848	0.010101	0.043771	0.0395623	0.0328283	0.0976431	0.0294613	0.0328283	0.0345118	0.0833333	0.0210438	0.0505051	0.0673401	0.0824916	0.0395623	0.0984848	0.0395623	0.0648148	0.00505051	0.0286195	0.985	0.9743	1.0509	0.5224	5.9804	-0.0092	1.4803	0.1035	1.0041	3.0287	0.1607	0.5785	504	0.246032	0.275794	0.257937	0.220238	0.503968	0.53373	0.0535714	0.047619	0.0833333	0.047619
NP001018494_NM001136043	9698	PUM1	PUM1	NP001018494.1	1188	126679	0.0984848	0.010101	0.043771	0.0395623	0.0328283	0.0976431	0.0294613	0.0328283	0.0345118	0.0833333	0.0210438	0.0505051	0.0673401	0.0824916	0.0395623	0.0984848	0.0395623	0.0648148	0.00505051	0.0286195	0.985	0.9743	1.0509	0.5224	5.9804	-0.0092	1.4803	0.1035	1.0041	3.0287	0.1607	0.5785	1320	0.280303	0.230303	0.233333	0.256061	0.513636	0.463636	0.0651515	0.0522727	0.069697	0.0712121
NP001018494_NM001142469	9698	PUM1	PUM1	NP001018494.1	1188	126679	0.0984848	0.010101	0.043771	0.0395623	0.0328283	0.0976431	0.0294613	0.0328283	0.0345118	0.0833333	0.0210438	0.0505051	0.0673401	0.0824916	0.0395623	0.0984848	0.0395623	0.0648148	0.00505051	0.0286195	0.985	0.9743	1.0509	0.5224	5.9804	-0.0092	1.4803	0.1035	1.0041	3.0287	0.1607	0.5785	564	0.312057	0.22695	0.301418	0.159574	0.613475	0.528369	0.0691489	0.0478723	0.113475	0.0549645
NP001018494_NM144600	9698	PUM1	PUM1	NP001018494.1	1188	126679	0.0984848	0.010101	0.043771	0.0395623	0.0328283	0.0976431	0.0294613	0.0328283	0.0345118	0.0833333	0.0210438	0.0505051	0.0673401	0.0824916	0.0395623	0.0984848	0.0395623	0.0648148	0.00505051	0.0286195	0.985	0.9743	1.0509	0.5224	5.9804	-0.0092	1.4803	0.1035	1.0041	3.0287	0.1607	0.5785	525	0.335238	0.194286	0.209524	0.260952	0.544762	0.40381	0.0914286	0.0495238	0.0838095	0.0838095
NP001018494_NM018405	9698	PUM1	PUM1	NP001018494.1	1188	126679	0.0984848	0.010101	0.043771	0.0395623	0.0328283	0.0976431	0.0294613	0.0328283	0.0345118	0.0833333	0.0210438	0.0505051	0.0673401	0.0824916	0.0395623	0.0984848	0.0395623	0.0648148	0.00505051	0.0286195	0.985	0.9743	1.0509	0.5224	5.9804	-0.0092	1.4803	0.1035	1.0041	3.0287	0.1607	0.5785	555	0.243243	0.264865	0.306306	0.185586	0.54955	0.571171	0.0378378	0.0558559	0.0882883	0.0522523
NP001018494_NM152352	9698	PUM1	PUM1	NP001018494.1	1188	126679	0.0984848	0.010101	0.043771	0.0395623	0.0328283	0.0976431	0.0294613	0.0328283	0.0345118	0.0833333	0.0210438	0.0505051	0.0673401	0.0824916	0.0395623	0.0984848	0.0395623	0.0648148	0.00505051	0.0286195	0.985	0.9743	1.0509	0.5224	5.9804	-0.0092	1.4803	0.1035	1.0041	3.0287	0.1607	0.5785	819	0.315018	0.206349	0.227106	0.251526	0.542125	0.433455	0.0842491	0.0586081	0.0744811	0.0634921
NP001018494_NM014177	9698	PUM1	PUM1	NP001018494.1	1188	126679	0.0984848	0.010101	0.043771	0.0395623	0.0328283	0.0976431	0.0294613	0.0328283	0.0345118	0.0833333	0.0210438	0.0505051	0.0673401	0.0824916	0.0395623	0.0984848	0.0395623	0.0648148	0.00505051	0.0286195	0.985	0.9743	1.0509	0.5224	5.9804	-0.0092	1.4803	0.1035	1.0041	3.0287	0.1607	0.5785	747	0.30656	0.186078	0.261044	0.246319	0.567604	0.447122	0.0722892	0.0455154	0.0883534	0.0722892
NP001018494_NM001006945	9698	PUM1	PUM1	NP001018494.1	1188	126679	0.0984848	0.010101	0.043771	0.0395623	0.0328283	0.0976431	0.0294613	0.0328283	0.0345118	0.0833333	0.0210438	0.0505051	0.0673401	0.0824916	0.0395623	0.0984848	0.0395623	0.0648148	0.00505051	0.0286195	0.985	0.9743	1.0509	0.5224	5.9804	-0.0092	1.4803	0.1035	1.0041	3.0287	0.1607	0.5785	702	0.410256	0.159544	0.213675	0.216524	0.623932	0.373219	0.122507	0.0541311	0.11396	0.0754986
NP001018494_NM023077	9698	PUM1	PUM1	NP001018494.1	1188	126679	0.0984848	0.010101	0.043771	0.0395623	0.0328283	0.0976431	0.0294613	0.0328283	0.0345118	0.0833333	0.0210438	0.0505051	0.0673401	0.0824916	0.0395623	0.0984848	0.0395623	0.0648148	0.00505051	0.0286195	0.985	0.9743	1.0509	0.5224	5.9804	-0.0092	1.4803	0.1035	1.0041	3.0287	0.1607	0.5785	696	0.261494	0.219828	0.304598	0.21408	0.566092	0.524425	0.058908	0.0574713	0.079023	0.0488506
NP001018494_NM198077	9698	PUM1	PUM1	NP001018494.1	1188	126679	0.0984848	0.010101	0.043771	0.0395623	0.0328283	0.0976431	0.0294613	0.0328283	0.0345118	0.0833333	0.0210438	0.0505051	0.0673401	0.0824916	0.0395623	0.0984848	0.0395623	0.0648148	0.00505051	0.0286195	0.985	0.9743	1.0509	0.5224	5.9804	-0.0092	1.4803	0.1035	1.0041	3.0287	0.1607	0.5785	549	0.313297	0.23133	0.295082	0.160291	0.608379	0.526412	0.0710383	0.0528233	0.112933	0.0510018
NP001018494_NM001142560	9698	PUM1	PUM1	NP001018494.1	1188	126679	0.0984848	0.010101	0.043771	0.0395623	0.0328283	0.0976431	0.0294613	0.0328283	0.0345118	0.0833333	0.0210438	0.0505051	0.0673401	0.0824916	0.0395623	0.0984848	0.0395623	0.0648148	0.00505051	0.0286195	0.985	0.9743	1.0509	0.5224	5.9804	-0.0092	1.4803	0.1035	1.0041	3.0287	0.1607	0.5785	834	0.208633	0.286571	0.303357	0.201439	0.51199	0.589928	0.029976	0.0515588	0.0839329	0.0383693
NP001018494_NM001009608	9698	PUM1	PUM1	NP001018494.1	1188	126679	0.0984848	0.010101	0.043771	0.0395623	0.0328283	0.0976431	0.0294613	0.0328283	0.0345118	0.0833333	0.0210438	0.0505051	0.0673401	0.0824916	0.0395623	0.0984848	0.0395623	0.0648148	0.00505051	0.0286195	0.985	0.9743	1.0509	0.5224	5.9804	-0.0092	1.4803	0.1035	1.0041	3.0287	0.1607	0.5785	1227	0.327628	0.214344	0.234719	0.223309	0.562347	0.449063	0.0814996	0.0488998	0.104319	0.0505297
NP001018494_NM145029	9698	PUM1	PUM1	NP001018494.1	1188	126679	0.0984848	0.010101	0.043771	0.0395623	0.0328283	0.0976431	0.0294613	0.0328283	0.0345118	0.0833333	0.0210438	0.0505051	0.0673401	0.0824916	0.0395623	0.0984848	0.0395623	0.0648148	0.00505051	0.0286195	0.985	0.9743	1.0509	0.5224	5.9804	-0.0092	1.4803	0.1035	1.0041	3.0287	0.1607	0.5785	546	0.192308	0.320513	0.238095	0.249084	0.430403	0.558608	0.032967	0.0677656	0.047619	0.03663
NP001018494_NM016520	9698	PUM1	PUM1	NP001018494.1	1188	126679	0.0984848	0.010101	0.043771	0.0395623	0.0328283	0.0976431	0.0294613	0.0328283	0.0345118	0.0833333	0.0210438	0.0505051	0.0673401	0.0824916	0.0395623	0.0984848	0.0395623	0.0648148	0.00505051	0.0286195	0.985	0.9743	1.0509	0.5224	5.9804	-0.0092	1.4803	0.1035	1.0041	3.0287	0.1607	0.5785	870	0.31954	0.203448	0.301149	0.175862	0.62069	0.504598	0.0747126	0.0528736	0.117241	0.0528736
NP001018494_NM024828	9698	PUM1	PUM1	NP001018494.1	1188	126679	0.0984848	0.010101	0.043771	0.0395623	0.0328283	0.0976431	0.0294613	0.0328283	0.0345118	0.0833333	0.0210438	0.0505051	0.0673401	0.0824916	0.0395623	0.0984848	0.0395623	0.0648148	0.00505051	0.0286195	0.985	0.9743	1.0509	0.5224	5.9804	-0.0092	1.4803	0.1035	1.0041	3.0287	0.1607	0.5785	1086	0.309392	0.200737	0.290055	0.199816	0.599448	0.490792	0.0764273	0.0414365	0.106814	0.0524862
NP001018494_NM001130850	9698	PUM1	PUM1	NP001018494.1	1188	126679	0.0984848	0.010101	0.043771	0.0395623	0.0328283	0.0976431	0.0294613	0.0328283	0.0345118	0.0833333	0.0210438	0.0505051	0.0673401	0.0824916	0.0395623	0.0984848	0.0395623	0.0648148	0.00505051	0.0286195	0.985	0.9743	1.0509	0.5224	5.9804	-0.0092	1.4803	0.1035	1.0041	3.0287	0.1607	0.5785	1026	0.349903	0.193957	0.197856	0.258285	0.547758	0.391813	0.0916179	0.0614035	0.0896686	0.0750487
NP001018494_NM005184	9698	PUM1	PUM1	NP001018494.1	1188	126679	0.0984848	0.010101	0.043771	0.0395623	0.0328283	0.0976431	0.0294613	0.0328283	0.0345118	0.0833333	0.0210438	0.0505051	0.0673401	0.0824916	0.0395623	0.0984848	0.0395623	0.0648148	0.00505051	0.0286195	0.985	0.9743	1.0509	0.5224	5.9804	-0.0092	1.4803	0.1035	1.0041	3.0287	0.1607	0.5785	450	0.284444	0.195556	0.333333	0.186667	0.617778	0.528889	0.0377778	0.0577778	0.108889	0.0733333
NP001018494_NM172215	9698	PUM1	PUM1	NP001018494.1	1188	126679	0.0984848	0.010101	0.043771	0.0395623	0.0328283	0.0976431	0.0294613	0.0328283	0.0345118	0.0833333	0.0210438	0.0505051	0.0673401	0.0824916	0.0395623	0.0984848	0.0395623	0.0648148	0.00505051	0.0286195	0.985	0.9743	1.0509	0.5224	5.9804	-0.0092	1.4803	0.1035	1.0041	3.0287	0.1607	0.5785	1473	0.220638	0.305499	0.282417	0.191446	0.503055	0.587916	0.0434487	0.053632	0.0685675	0.0448065
NP001018494_NM203459	9698	PUM1	PUM1	NP001018494.1	1188	126679	0.0984848	0.010101	0.043771	0.0395623	0.0328283	0.0976431	0.0294613	0.0328283	0.0345118	0.0833333	0.0210438	0.0505051	0.0673401	0.0824916	0.0395623	0.0984848	0.0395623	0.0648148	0.00505051	0.0286195	0.985	0.9743	1.0509	0.5224	5.9804	-0.0092	1.4803	0.1035	1.0041	3.0287	0.1607	0.5785	4437	0.338968	0.200811	0.210052	0.250169	0.54902	0.410863	0.0903764	0.0540906	0.081812	0.0752761
NP001018494_NM001171166	9698	PUM1	PUM1	NP001018494.1	1188	126679	0.0984848	0.010101	0.043771	0.0395623	0.0328283	0.0976431	0.0294613	0.0328283	0.0345118	0.0833333	0.0210438	0.0505051	0.0673401	0.0824916	0.0395623	0.0984848	0.0395623	0.0648148	0.00505051	0.0286195	0.985	0.9743	1.0509	0.5224	5.9804	-0.0092	1.4803	0.1035	1.0041	3.0287	0.1607	0.5785	3594	0.202838	0.321647	0.27379	0.201725	0.476628	0.595437	0.0289371	0.0503617	0.0840289	0.0350584
NP001018494_NM014296	9698	PUM1	PUM1	NP001018494.1	1188	126679	0.0984848	0.010101	0.043771	0.0395623	0.0328283	0.0976431	0.0294613	0.0328283	0.0345118	0.0833333	0.0210438	0.0505051	0.0673401	0.0824916	0.0395623	0.0984848	0.0395623	0.0648148	0.00505051	0.0286195	0.985	0.9743	1.0509	0.5224	5.9804	-0.0092	1.4803	0.1035	1.0041	3.0287	0.1607	0.5785	2442	0.320639	0.198608	0.213759	0.266994	0.534398	0.412367	0.0773956	0.0593776	0.0765766	0.0806716
NP001018494_NM006135	9698	PUM1	PUM1	NP001018494.1	1188	126679	0.0984848	0.010101	0.043771	0.0395623	0.0328283	0.0976431	0.0294613	0.0328283	0.0345118	0.0833333	0.0210438	0.0505051	0.0673401	0.0824916	0.0395623	0.0984848	0.0395623	0.0648148	0.00505051	0.0286195	0.985	0.9743	1.0509	0.5224	5.9804	-0.0092	1.4803	0.1035	1.0041	3.0287	0.1607	0.5785	861	0.326365	0.202091	0.225319	0.246225	0.551684	0.42741	0.0789779	0.0569106	0.0859466	0.0813008
NP001018494_NM006136	9698	PUM1	PUM1	NP001018494.1	1188	126679	0.0984848	0.010101	0.043771	0.0395623	0.0328283	0.0976431	0.0294613	0.0328283	0.0345118	0.0833333	0.0210438	0.0505051	0.0673401	0.0824916	0.0395623	0.0984848	0.0395623	0.0648148	0.00505051	0.0286195	0.985	0.9743	1.0509	0.5224	5.9804	-0.0092	1.4803	0.1035	1.0041	3.0287	0.1607	0.5785	861	0.348432	0.16957	0.224158	0.25784	0.57259	0.393728	0.0940767	0.047619	0.0894309	0.087108
NP001018494_NM001126055	9698	PUM1	PUM1	NP001018494.1	1188	126679	0.0984848	0.010101	0.043771	0.0395623	0.0328283	0.0976431	0.0294613	0.0328283	0.0345118	0.0833333	0.0210438	0.0505051	0.0673401	0.0824916	0.0395623	0.0984848	0.0395623	0.0648148	0.00505051	0.0286195	0.985	0.9743	1.0509	0.5224	5.9804	-0.0092	1.4803	0.1035	1.0041	3.0287	0.1607	0.5785	2694	0.311062	0.207127	0.237565	0.244246	0.548627	0.444692	0.0697847	0.0634744	0.0812918	0.0708983
NP001018494_NM032991	9698	PUM1	PUM1	NP001018494.1	1188	126679	0.0984848	0.010101	0.043771	0.0395623	0.0328283	0.0976431	0.0294613	0.0328283	0.0345118	0.0833333	0.0210438	0.0505051	0.0673401	0.0824916	0.0395623	0.0984848	0.0395623	0.0648148	0.00505051	0.0286195	0.985	0.9743	1.0509	0.5224	5.9804	-0.0092	1.4803	0.1035	1.0041	3.0287	0.1607	0.5785	834	0.328537	0.176259	0.214628	0.280576	0.543165	0.390887	0.088729	0.057554	0.0551559	0.088729
NP001018494_NM001137668	9698	PUM1	PUM1	NP001018494.1	1188	126679	0.0984848	0.010101	0.043771	0.0395623	0.0328283	0.0976431	0.0294613	0.0328283	0.0345118	0.0833333	0.0210438	0.0505051	0.0673401	0.0824916	0.0395623	0.0984848	0.0395623	0.0648148	0.00505051	0.0286195	0.985	0.9743	1.0509	0.5224	5.9804	-0.0092	1.4803	0.1035	1.0041	3.0287	0.1607	0.5785	5901	0.37214	0.169802	0.202678	0.25538	0.574818	0.372479	0.105745	0.0532113	0.0894764	0.0799864
NP001018494_NM022845	9698	PUM1	PUM1	NP001018494.1	1188	126679	0.0984848	0.010101	0.043771	0.0395623	0.0328283	0.0976431	0.0294613	0.0328283	0.0345118	0.0833333	0.0210438	0.0505051	0.0673401	0.0824916	0.0395623	0.0984848	0.0395623	0.0648148	0.00505051	0.0286195	0.985	0.9743	1.0509	0.5224	5.9804	-0.0092	1.4803	0.1035	1.0041	3.0287	0.1607	0.5785	564	0.269504	0.223404	0.306738	0.200355	0.576241	0.530142	0.0567376	0.0496454	0.106383	0.0425532
NP001018494_NM005188	9698	PUM1	PUM1	NP001018494.1	1188	126679	0.0984848	0.010101	0.043771	0.0395623	0.0328283	0.0976431	0.0294613	0.0328283	0.0345118	0.0833333	0.0210438	0.0505051	0.0673401	0.0824916	0.0395623	0.0984848	0.0395623	0.0648148	0.00505051	0.0286195	0.985	0.9743	1.0509	0.5224	5.9804	-0.0092	1.4803	0.1035	1.0041	3.0287	0.1607	0.5785	2721	0.253583	0.271591	0.238148	0.236678	0.491731	0.509739	0.0540243	0.0529217	0.0683572	0.062477
NP001018494_NM018237	9698	PUM1	PUM1	NP001018494.1	1188	126679	0.0984848	0.010101	0.043771	0.0395623	0.0328283	0.0976431	0.0294613	0.0328283	0.0345118	0.0833333	0.0210438	0.0505051	0.0673401	0.0824916	0.0395623	0.0984848	0.0395623	0.0648148	0.00505051	0.0286195	0.985	0.9743	1.0509	0.5224	5.9804	-0.0092	1.4803	0.1035	1.0041	3.0287	0.1607	0.5785	3453	0.353026	0.194903	0.222415	0.229655	0.575442	0.417318	0.0903562	0.0564726	0.0978859	0.070084
NP001018494_NM144716	9698	PUM1	PUM1	NP001018494.1	1188	126679	0.0984848	0.010101	0.043771	0.0395623	0.0328283	0.0976431	0.0294613	0.0328283	0.0345118	0.0833333	0.0210438	0.0505051	0.0673401	0.0824916	0.0395623	0.0984848	0.0395623	0.0648148	0.00505051	0.0286195	0.985	0.9743	1.0509	0.5224	5.9804	-0.0092	1.4803	0.1035	1.0041	3.0287	0.1607	0.5785	540	0.296296	0.225926	0.366667	0.111111	0.662963	0.592593	0.0796296	0.0481481	0.125926	0.0203704
NP001018494_NM024725	9698	PUM1	PUM1	NP001018494.1	1188	126679	0.0984848	0.010101	0.043771	0.0395623	0.0328283	0.0976431	0.0294613	0.0328283	0.0345118	0.0833333	0.0210438	0.0505051	0.0673401	0.0824916	0.0395623	0.0984848	0.0395623	0.0648148	0.00505051	0.0286195	0.985	0.9743	1.0509	0.5224	5.9804	-0.0092	1.4803	0.1035	1.0041	3.0287	0.1607	0.5785	1635	0.385933	0.138226	0.225076	0.250765	0.611009	0.363303	0.10948	0.048318	0.0990826	0.0874618
NP001018494_NM031966	9698	PUM1	PUM1	NP001018494.1	1188	126679	0.0984848	0.010101	0.043771	0.0395623	0.0328283	0.0976431	0.0294613	0.0328283	0.0345118	0.0833333	0.0210438	0.0505051	0.0673401	0.0824916	0.0395623	0.0984848	0.0395623	0.0648148	0.00505051	0.0286195	0.985	0.9743	1.0509	0.5224	5.9804	-0.0092	1.4803	0.1035	1.0041	3.0287	0.1607	0.5785	1302	0.307988	0.21659	0.228111	0.247312	0.536098	0.4447	0.0814132	0.0583717	0.0760369	0.0652842
NP001018494_NM004701	9698	PUM1	PUM1	NP001018494.1	1188	126679	0.0984848	0.010101	0.043771	0.0395623	0.0328283	0.0976431	0.0294613	0.0328283	0.0345118	0.0833333	0.0210438	0.0505051	0.0673401	0.0824916	0.0395623	0.0984848	0.0395623	0.0648148	0.00505051	0.0286195	0.985	0.9743	1.0509	0.5224	5.9804	-0.0092	1.4803	0.1035	1.0041	3.0287	0.1607	0.5785	1197	0.310777	0.213868	0.222222	0.253133	0.532999	0.43609	0.075188	0.0551378	0.0877193	0.0668338
NP001018494_NM057749	9698	PUM1	PUM1	NP001018494.1	1188	126679	0.0984848	0.010101	0.043771	0.0395623	0.0328283	0.0976431	0.0294613	0.0328283	0.0345118	0.0833333	0.0210438	0.0505051	0.0673401	0.0824916	0.0395623	0.0984848	0.0395623	0.0648148	0.00505051	0.0286195	0.985	0.9743	1.0509	0.5224	5.9804	-0.0092	1.4803	0.1035	1.0041	3.0287	0.1607	0.5785	1215	0.33251	0.19177	0.197531	0.278189	0.530041	0.3893	0.0790123	0.0567901	0.0823045	0.0790123
NP001018494_NM012120	9698	PUM1	PUM1	NP001018494.1	1188	126679	0.0984848	0.010101	0.043771	0.0395623	0.0328283	0.0976431	0.0294613	0.0328283	0.0345118	0.0833333	0.0210438	0.0505051	0.0673401	0.0824916	0.0395623	0.0984848	0.0395623	0.0648148	0.00505051	0.0286195	0.985	0.9743	1.0509	0.5224	5.9804	-0.0092	1.4803	0.1035	1.0041	3.0287	0.1607	0.5785	1920	0.367188	0.185417	0.218229	0.229167	0.585417	0.403646	0.10625	0.059375	0.0901042	0.0640625
NP001018494_NM001779	9698	PUM1	PUM1	NP001018494.1	1188	126679	0.0984848	0.010101	0.043771	0.0395623	0.0328283	0.0976431	0.0294613	0.0328283	0.0345118	0.0833333	0.0210438	0.0505051	0.0673401	0.0824916	0.0395623	0.0984848	0.0395623	0.0648148	0.00505051	0.0286195	0.985	0.9743	1.0509	0.5224	5.9804	-0.0092	1.4803	0.1035	1.0041	3.0287	0.1607	0.5785	753	0.317397	0.200531	0.192563	0.289509	0.50996	0.393094	0.0796813	0.061089	0.0531208	0.0996016
NP001018494_NM001038702	9698	PUM1	PUM1	NP001018494.1	1188	126679	0.0984848	0.010101	0.043771	0.0395623	0.0328283	0.0976431	0.0294613	0.0328283	0.0345118	0.0833333	0.0210438	0.0505051	0.0673401	0.0824916	0.0395623	0.0984848	0.0395623	0.0648148	0.00505051	0.0286195	0.985	0.9743	1.0509	0.5224	5.9804	-0.0092	1.4803	0.1035	1.0041	3.0287	0.1607	0.5785	255	0.278431	0.192157	0.290196	0.239216	0.568627	0.482353	0.0588235	0.0392157	0.0941176	0.0745098
NP001018494_NM018101	9698	PUM1	PUM1	NP001018494.1	1188	126679	0.0984848	0.010101	0.043771	0.0395623	0.0328283	0.0976431	0.0294613	0.0328283	0.0345118	0.0833333	0.0210438	0.0505051	0.0673401	0.0824916	0.0395623	0.0984848	0.0395623	0.0648148	0.00505051	0.0286195	0.985	0.9743	1.0509	0.5224	5.9804	-0.0092	1.4803	0.1035	1.0041	3.0287	0.1607	0.5785	843	0.311981	0.253855	0.259786	0.174377	0.571767	0.513642	0.0830368	0.0616845	0.0972716	0.0415184
NP001018494_NM001799	9698	PUM1	PUM1	NP001018494.1	1188	126679	0.0984848	0.010101	0.043771	0.0395623	0.0328283	0.0976431	0.0294613	0.0328283	0.0345118	0.0833333	0.0210438	0.0505051	0.0673401	0.0824916	0.0395623	0.0984848	0.0395623	0.0648148	0.00505051	0.0286195	0.985	0.9743	1.0509	0.5224	5.9804	-0.0092	1.4803	0.1035	1.0041	3.0287	0.1607	0.5785	1041	0.317003	0.192123	0.222863	0.268012	0.539866	0.414986	0.0739673	0.0576369	0.0787704	0.079731
NP001018494_NM000389	9698	PUM1	PUM1	NP001018494.1	1188	126679	0.0984848	0.010101	0.043771	0.0395623	0.0328283	0.0976431	0.0294613	0.0328283	0.0345118	0.0833333	0.0210438	0.0505051	0.0673401	0.0824916	0.0395623	0.0984848	0.0395623	0.0648148	0.00505051	0.0286195	0.985	0.9743	1.0509	0.5224	5.9804	-0.0092	1.4803	0.1035	1.0041	3.0287	0.1607	0.5785	495	0.193939	0.30303	0.333333	0.169697	0.527273	0.636364	0.0282828	0.0565657	0.0787879	0.0242424
NP001018494_NM004064	9698	PUM1	PUM1	NP001018494.1	1188	126679	0.0984848	0.010101	0.043771	0.0395623	0.0328283	0.0976431	0.0294613	0.0328283	0.0345118	0.0833333	0.0210438	0.0505051	0.0673401	0.0824916	0.0395623	0.0984848	0.0395623	0.0648148	0.00505051	0.0286195	0.985	0.9743	1.0509	0.5224	5.9804	-0.0092	1.4803	0.1035	1.0041	3.0287	0.1607	0.5785	597	0.269682	0.274707	0.309883	0.145729	0.579564	0.58459	0.0670017	0.0586265	0.102178	0.0251256
NP001018494_NM003818	9698	PUM1	PUM1	NP001018494.1	1188	126679	0.0984848	0.010101	0.043771	0.0395623	0.0328283	0.0976431	0.0294613	0.0328283	0.0345118	0.0833333	0.0210438	0.0505051	0.0673401	0.0824916	0.0395623	0.0984848	0.0395623	0.0648148	0.00505051	0.0286195	0.985	0.9743	1.0509	0.5224	5.9804	-0.0092	1.4803	0.1035	1.0041	3.0287	0.1607	0.5785	1338	0.230194	0.250374	0.237668	0.281764	0.467862	0.488042	0.0351271	0.0560538	0.0620329	0.0702541
NP001018494_NM005194	9698	PUM1	PUM1	NP001018494.1	1188	126679	0.0984848	0.010101	0.043771	0.0395623	0.0328283	0.0976431	0.0294613	0.0328283	0.0345118	0.0833333	0.0210438	0.0505051	0.0673401	0.0824916	0.0395623	0.0984848	0.0395623	0.0648148	0.00505051	0.0286195	0.985	0.9743	1.0509	0.5224	5.9804	-0.0092	1.4803	0.1035	1.0041	3.0287	0.1607	0.5785	1038	0.15896	0.402697	0.33237	0.105973	0.491329	0.735067	0.0308285	0.0520231	0.0655106	0.00963391
NP001018494_NM014810	9698	PUM1	PUM1	NP001018494.1	1188	126679	0.0984848	0.010101	0.043771	0.0395623	0.0328283	0.0976431	0.0294613	0.0328283	0.0345118	0.0833333	0.0210438	0.0505051	0.0673401	0.0824916	0.0395623	0.0984848	0.0395623	0.0648148	0.00505051	0.0286195	0.985	0.9743	1.0509	0.5224	5.9804	-0.0092	1.4803	0.1035	1.0041	3.0287	0.1607	0.5785	9354	0.349155	0.1966	0.22012	0.234124	0.569275	0.41672	0.0916186	0.0528116	0.101347	0.067244
NP001018494_NM001274	9698	PUM1	PUM1	NP001018494.1	1188	126679	0.0984848	0.010101	0.043771	0.0395623	0.0328283	0.0976431	0.0294613	0.0328283	0.0345118	0.0833333	0.0210438	0.0505051	0.0673401	0.0824916	0.0395623	0.0984848	0.0395623	0.0648148	0.00505051	0.0286195	0.985	0.9743	1.0509	0.5224	5.9804	-0.0092	1.4803	0.1035	1.0041	3.0287	0.1607	0.5785	1431	0.319357	0.189378	0.228512	0.262753	0.547869	0.41789	0.081761	0.0461216	0.0831586	0.0796646
NP001018494_NM152284	9698	PUM1	PUM1	NP001018494.1	1188	126679	0.0984848	0.010101	0.043771	0.0395623	0.0328283	0.0976431	0.0294613	0.0328283	0.0345118	0.0833333	0.0210438	0.0505051	0.0673401	0.0824916	0.0395623	0.0984848	0.0395623	0.0648148	0.00505051	0.0286195	0.985	0.9743	1.0509	0.5224	5.9804	-0.0092	1.4803	0.1035	1.0041	3.0287	0.1607	0.5785	702	0.323362	0.220798	0.259259	0.196581	0.582621	0.480057	0.0783476	0.0498576	0.103989	0.0641026
NP001018494_NM152272	9698	PUM1	PUM1	NP001018494.1	1188	126679	0.0984848	0.010101	0.043771	0.0395623	0.0328283	0.0976431	0.0294613	0.0328283	0.0345118	0.0833333	0.0210438	0.0505051	0.0673401	0.0824916	0.0395623	0.0984848	0.0395623	0.0648148	0.00505051	0.0286195	0.985	0.9743	1.0509	0.5224	5.9804	-0.0092	1.4803	0.1035	1.0041	3.0287	0.1607	0.5785	1362	0.232012	0.256241	0.31351	0.198238	0.545521	0.56975	0.0469897	0.0433186	0.101322	0.0315712
NP001018494_NM017444	9698	PUM1	PUM1	NP001018494.1	1188	126679	0.0984848	0.010101	0.043771	0.0395623	0.0328283	0.0976431	0.0294613	0.0328283	0.0345118	0.0833333	0.0210438	0.0505051	0.0673401	0.0824916	0.0395623	0.0984848	0.0395623	0.0648148	0.00505051	0.0286195	0.985	0.9743	1.0509	0.5224	5.9804	-0.0092	1.4803	0.1035	1.0041	3.0287	0.1607	0.5785	396	0.315657	0.217172	0.260101	0.207071	0.575758	0.477273	0.0732323	0.0530303	0.0959596	0.0606061
NP001018494_NM001827	9698	PUM1	PUM1	NP001018494.1	1188	126679	0.0984848	0.010101	0.043771	0.0395623	0.0328283	0.0976431	0.0294613	0.0328283	0.0345118	0.0833333	0.0210438	0.0505051	0.0673401	0.0824916	0.0395623	0.0984848	0.0395623	0.0648148	0.00505051	0.0286195	0.985	0.9743	1.0509	0.5224	5.9804	-0.0092	1.4803	0.1035	1.0041	3.0287	0.1607	0.5785	240	0.325	0.2375	0.2	0.2375	0.525	0.4375	0.0666667	0.0958333	0.0791667	0.0583333
NP001018494_NM013943	9698	PUM1	PUM1	NP001018494.1	1188	126679	0.0984848	0.010101	0.043771	0.0395623	0.0328283	0.0976431	0.0294613	0.0328283	0.0345118	0.0833333	0.0210438	0.0505051	0.0673401	0.0824916	0.0395623	0.0984848	0.0395623	0.0648148	0.00505051	0.0286195	0.985	0.9743	1.0509	0.5224	5.9804	-0.0092	1.4803	0.1035	1.0041	3.0287	0.1607	0.5785	762	0.318898	0.211286	0.225722	0.244094	0.544619	0.437008	0.0853018	0.0498688	0.0721785	0.0774278
NP001018494_NM004071	9698	PUM1	PUM1	NP001018494.1	1188	126679	0.0984848	0.010101	0.043771	0.0395623	0.0328283	0.0976431	0.0294613	0.0328283	0.0345118	0.0833333	0.0210438	0.0505051	0.0673401	0.0824916	0.0395623	0.0984848	0.0395623	0.0648148	0.00505051	0.0286195	0.985	0.9743	1.0509	0.5224	5.9804	-0.0092	1.4803	0.1035	1.0041	3.0287	0.1607	0.5785	1455	0.340893	0.175945	0.224055	0.259107	0.564948	0.4	0.0749141	0.0639175	0.0872852	0.0865979
NP001018494_NM003993	9698	PUM1	PUM1	NP001018494.1	1188	126679	0.0984848	0.010101	0.043771	0.0395623	0.0328283	0.0976431	0.0294613	0.0328283	0.0345118	0.0833333	0.0210438	0.0505051	0.0673401	0.0824916	0.0395623	0.0984848	0.0395623	0.0648148	0.00505051	0.0286195	0.985	0.9743	1.0509	0.5224	5.9804	-0.0092	1.4803	0.1035	1.0041	3.0287	0.1607	0.5785	1497	0.259853	0.259185	0.273881	0.207081	0.533734	0.533066	0.0420842	0.0641283	0.0895124	0.0554442
NP001018494_NM020666	9698	PUM1	PUM1	NP001018494.1	1188	126679	0.0984848	0.010101	0.043771	0.0395623	0.0328283	0.0976431	0.0294613	0.0328283	0.0345118	0.0833333	0.0210438	0.0505051	0.0673401	0.0824916	0.0395623	0.0984848	0.0395623	0.0648148	0.00505051	0.0286195	0.985	0.9743	1.0509	0.5224	5.9804	-0.0092	1.4803	0.1035	1.0041	3.0287	0.1607	0.5785	1446	0.327801	0.178423	0.229599	0.264177	0.5574	0.408022	0.0733057	0.0560166	0.0836791	0.0878285
NP001018494_NM006660	9698	PUM1	PUM1	NP001018494.1	1188	126679	0.0984848	0.010101	0.043771	0.0395623	0.0328283	0.0976431	0.0294613	0.0328283	0.0345118	0.0833333	0.0210438	0.0505051	0.0673401	0.0824916	0.0395623	0.0984848	0.0395623	0.0648148	0.00505051	0.0286195	0.985	0.9743	1.0509	0.5224	5.9804	-0.0092	1.4803	0.1035	1.0041	3.0287	0.1607	0.5785	1902	0.321241	0.188223	0.241325	0.249211	0.562566	0.429548	0.0867508	0.0462671	0.0856993	0.073081
NP001018494_NM030629	9698	PUM1	PUM1	NP001018494.1	1188	126679	0.0984848	0.010101	0.043771	0.0395623	0.0328283	0.0976431	0.0294613	0.0328283	0.0345118	0.0833333	0.0210438	0.0505051	0.0673401	0.0824916	0.0395623	0.0984848	0.0395623	0.0648148	0.00505051	0.0286195	0.985	0.9743	1.0509	0.5224	5.9804	-0.0092	1.4803	0.1035	1.0041	3.0287	0.1607	0.5785	2040	0.237255	0.305882	0.267647	0.189216	0.504902	0.573529	0.0534314	0.0656863	0.0705882	0.0357843
NP001018494_NM004779	9698	PUM1	PUM1	NP001018494.1	1188	126679	0.0984848	0.010101	0.043771	0.0395623	0.0328283	0.0976431	0.0294613	0.0328283	0.0345118	0.0833333	0.0210438	0.0505051	0.0673401	0.0824916	0.0395623	0.0984848	0.0395623	0.0648148	0.00505051	0.0286195	0.985	0.9743	1.0509	0.5224	5.9804	-0.0092	1.4803	0.1035	1.0041	3.0287	0.1607	0.5785	879	0.282139	0.186576	0.25256	0.278726	0.534699	0.439135	0.0534699	0.0420933	0.0921502	0.0807736
NP001018494_NM031431	9698	PUM1	PUM1	NP001018494.1	1188	126679	0.0984848	0.010101	0.043771	0.0395623	0.0328283	0.0976431	0.0294613	0.0328283	0.0345118	0.0833333	0.0210438	0.0505051	0.0673401	0.0824916	0.0395623	0.0984848	0.0395623	0.0648148	0.00505051	0.0286195	0.985	0.9743	1.0509	0.5224	5.9804	-0.0092	1.4803	0.1035	1.0041	3.0287	0.1607	0.5785	2487	0.300764	0.21351	0.21914	0.266586	0.519903	0.43265	0.0715722	0.0579011	0.0780056	0.0715722
NP001018494_NM025147	9698	PUM1	PUM1	NP001018494.1	1188	126679	0.0984848	0.010101	0.043771	0.0395623	0.0328283	0.0976431	0.0294613	0.0328283	0.0345118	0.0833333	0.0210438	0.0505051	0.0673401	0.0824916	0.0395623	0.0984848	0.0395623	0.0648148	0.00505051	0.0286195	0.985	0.9743	1.0509	0.5224	5.9804	-0.0092	1.4803	0.1035	1.0041	3.0287	0.1607	0.5785	717	0.290098	0.189679	0.23152	0.288703	0.521618	0.421199	0.0641562	0.0460251	0.0725244	0.0850767
NP001018494_NM016138	9698	PUM1	PUM1	NP001018494.1	1188	126679	0.0984848	0.010101	0.043771	0.0395623	0.0328283	0.0976431	0.0294613	0.0328283	0.0345118	0.0833333	0.0210438	0.0505051	0.0673401	0.0824916	0.0395623	0.0984848	0.0395623	0.0648148	0.00505051	0.0286195	0.985	0.9743	1.0509	0.5224	5.9804	-0.0092	1.4803	0.1035	1.0041	3.0287	0.1607	0.5785	654	0.252294	0.229358	0.313456	0.204893	0.565749	0.542813	0.0519878	0.0366972	0.0749235	0.0718654
NP001018494_NM153634	9698	PUM1	PUM1	NP001018494.1	1188	126679	0.0984848	0.010101	0.043771	0.0395623	0.0328283	0.0976431	0.0294613	0.0328283	0.0345118	0.0833333	0.0210438	0.0505051	0.0673401	0.0824916	0.0395623	0.0984848	0.0395623	0.0648148	0.00505051	0.0286195	0.985	0.9743	1.0509	0.5224	5.9804	-0.0092	1.4803	0.1035	1.0041	3.0287	0.1607	0.5785	1695	0.312684	0.187611	0.225369	0.274336	0.538053	0.412979	0.0749263	0.0530973	0.0755162	0.0837758
NP001018494_NM017437	9698	PUM1	PUM1	NP001018494.1	1188	126679	0.0984848	0.010101	0.043771	0.0395623	0.0328283	0.0976431	0.0294613	0.0328283	0.0345118	0.0833333	0.0210438	0.0505051	0.0673401	0.0824916	0.0395623	0.0984848	0.0395623	0.0648148	0.00505051	0.0286195	0.985	0.9743	1.0509	0.5224	5.9804	-0.0092	1.4803	0.1035	1.0041	3.0287	0.1607	0.5785	2349	0.318008	0.179651	0.228182	0.274159	0.54619	0.407833	0.0744998	0.0464027	0.0855683	0.0804598
NP001018494_NM016441	9698	PUM1	PUM1	NP001018494.1	1188	126679	0.0984848	0.010101	0.043771	0.0395623	0.0328283	0.0976431	0.0294613	0.0328283	0.0345118	0.0833333	0.0210438	0.0505051	0.0673401	0.0824916	0.0395623	0.0984848	0.0395623	0.0648148	0.00505051	0.0286195	0.985	0.9743	1.0509	0.5224	5.9804	-0.0092	1.4803	0.1035	1.0041	3.0287	0.1607	0.5785	3111	0.235937	0.264867	0.267117	0.23208	0.503054	0.531983	0.0514304	0.0556091	0.0658952	0.0504661
NP001018494_NM005206	9698	PUM1	PUM1	NP001018494.1	1188	126679	0.0984848	0.010101	0.043771	0.0395623	0.0328283	0.0976431	0.0294613	0.0328283	0.0345118	0.0833333	0.0210438	0.0505051	0.0673401	0.0824916	0.0395623	0.0984848	0.0395623	0.0648148	0.00505051	0.0286195	0.985	0.9743	1.0509	0.5224	5.9804	-0.0092	1.4803	0.1035	1.0041	3.0287	0.1607	0.5785	615	0.226016	0.255285	0.321951	0.196748	0.547967	0.577236	0.0357724	0.0455285	0.095935	0.0439024
NP001018494_NM004075	9698	PUM1	PUM1	NP001018494.1	1188	126679	0.0984848	0.010101	0.043771	0.0395623	0.0328283	0.0976431	0.0294613	0.0328283	0.0345118	0.0833333	0.0210438	0.0505051	0.0673401	0.0824916	0.0395623	0.0984848	0.0395623	0.0648148	0.00505051	0.0286195	0.985	0.9743	1.0509	0.5224	5.9804	-0.0092	1.4803	0.1035	1.0041	3.0287	0.1607	0.5785	1761	0.283362	0.208404	0.243044	0.26519	0.526405	0.451448	0.0664395	0.0488359	0.0760931	0.0709824
NP001018494_NM177560	9698	PUM1	PUM1	NP001018494.1	1188	126679	0.0984848	0.010101	0.043771	0.0395623	0.0328283	0.0976431	0.0294613	0.0328283	0.0345118	0.0833333	0.0210438	0.0505051	0.0673401	0.0824916	0.0395623	0.0984848	0.0395623	0.0648148	0.00505051	0.0286195	0.985	0.9743	1.0509	0.5224	5.9804	-0.0092	1.4803	0.1035	1.0041	3.0287	0.1607	0.5785	768	0.257812	0.226562	0.25	0.265625	0.507812	0.476562	0.0416667	0.0507812	0.0703125	0.0859375
NP001018494_NM001033522	9698	PUM1	PUM1	NP001018494.1	1188	126679	0.0984848	0.010101	0.043771	0.0395623	0.0328283	0.0976431	0.0294613	0.0328283	0.0345118	0.0833333	0.0210438	0.0505051	0.0673401	0.0824916	0.0395623	0.0984848	0.0395623	0.0648148	0.00505051	0.0286195	0.985	0.9743	1.0509	0.5224	5.9804	-0.0092	1.4803	0.1035	1.0041	3.0287	0.1607	0.5785	1296	0.280864	0.238426	0.22608	0.25463	0.506944	0.464506	0.0555556	0.0709877	0.058642	0.0748457
NP001018494_NM001033505	9698	PUM1	PUM1	NP001018494.1	1188	126679	0.0984848	0.010101	0.043771	0.0395623	0.0328283	0.0976431	0.0294613	0.0328283	0.0345118	0.0833333	0.0210438	0.0505051	0.0673401	0.0824916	0.0395623	0.0984848	0.0395623	0.0648148	0.00505051	0.0286195	0.985	0.9743	1.0509	0.5224	5.9804	-0.0092	1.4803	0.1035	1.0041	3.0287	0.1607	0.5785	312	0.326923	0.182692	0.237179	0.253205	0.564103	0.419872	0.0641026	0.0480769	0.11859	0.0769231
NP001018494_NM006565	9698	PUM1	PUM1	NP001018494.1	1188	126679	0.0984848	0.010101	0.043771	0.0395623	0.0328283	0.0976431	0.0294613	0.0328283	0.0345118	0.0833333	0.0210438	0.0505051	0.0673401	0.0824916	0.0395623	0.0984848	0.0395623	0.0648148	0.00505051	0.0286195	0.985	0.9743	1.0509	0.5224	5.9804	-0.0092	1.4803	0.1035	1.0041	3.0287	0.1607	0.5785	2184	0.314103	0.229853	0.260989	0.195055	0.575092	0.490842	0.0695971	0.0659341	0.100275	0.0517399
NP001018494_NM182642	9698	PUM1	PUM1	NP001018494.1	1188	126679	0.0984848	0.010101	0.043771	0.0395623	0.0328283	0.0976431	0.0294613	0.0328283	0.0345118	0.0833333	0.0210438	0.0505051	0.0673401	0.0824916	0.0395623	0.0984848	0.0395623	0.0648148	0.00505051	0.0286195	0.985	0.9743	1.0509	0.5224	5.9804	-0.0092	1.4803	0.1035	1.0041	3.0287	0.1607	0.5785	783	0.195402	0.305236	0.300128	0.199234	0.49553	0.605364	0.0306513	0.0574713	0.0727969	0.0319285
NP001018494_NM153742	9698	PUM1	PUM1	NP001018494.1	1188	126679	0.0984848	0.010101	0.043771	0.0395623	0.0328283	0.0976431	0.0294613	0.0328283	0.0345118	0.0833333	0.0210438	0.0505051	0.0673401	0.0824916	0.0395623	0.0984848	0.0395623	0.0648148	0.00505051	0.0286195	0.985	0.9743	1.0509	0.5224	5.9804	-0.0092	1.4803	0.1035	1.0041	3.0287	0.1607	0.5785	1086	0.267956	0.223757	0.236648	0.271639	0.504604	0.460405	0.0598527	0.0478821	0.0745856	0.0662983
NP001018494_NM014992	9698	PUM1	PUM1	NP001018494.1	1188	126679	0.0984848	0.010101	0.043771	0.0395623	0.0328283	0.0976431	0.0294613	0.0328283	0.0345118	0.0833333	0.0210438	0.0505051	0.0673401	0.0824916	0.0395623	0.0984848	0.0395623	0.0648148	0.00505051	0.0286195	0.985	0.9743	1.0509	0.5224	5.9804	-0.0092	1.4803	0.1035	1.0041	3.0287	0.1607	0.5785	3237	0.329317	0.212542	0.230769	0.227371	0.560087	0.443312	0.0886623	0.0552981	0.0911338	0.0611677
NP001018494_NM138709	9698	PUM1	PUM1	NP001018494.1	1188	126679	0.0984848	0.010101	0.043771	0.0395623	0.0328283	0.0976431	0.0294613	0.0328283	0.0345118	0.0833333	0.0210438	0.0505051	0.0673401	0.0824916	0.0395623	0.0984848	0.0395623	0.0648148	0.00505051	0.0286195	0.985	0.9743	1.0509	0.5224	5.9804	-0.0092	1.4803	0.1035	1.0041	3.0287	0.1607	0.5785	3198	0.222014	0.3202	0.298937	0.158849	0.520951	0.619137	0.0397123	0.0597248	0.0888055	0.0290807
NP001018494_NM006571	9698	PUM1	PUM1	NP001018494.1	1188	126679	0.0984848	0.010101	0.043771	0.0395623	0.0328283	0.0976431	0.0294613	0.0328283	0.0345118	0.0833333	0.0210438	0.0505051	0.0673401	0.0824916	0.0395623	0.0984848	0.0395623	0.0648148	0.00505051	0.0286195	0.985	0.9743	1.0509	0.5224	5.9804	-0.0092	1.4803	0.1035	1.0041	3.0287	0.1607	0.5785	573	0.335079	0.200698	0.233857	0.230366	0.568935	0.434555	0.0890052	0.052356	0.0802792	0.08726
NP001018494_NM001164234	9698	PUM1	PUM1	NP001018494.1	1188	126679	0.0984848	0.010101	0.043771	0.0395623	0.0328283	0.0976431	0.0294613	0.0328283	0.0345118	0.0833333	0.0210438	0.0505051	0.0673401	0.0824916	0.0395623	0.0984848	0.0395623	0.0648148	0.00505051	0.0286195	0.985	0.9743	1.0509	0.5224	5.9804	-0.0092	1.4803	0.1035	1.0041	3.0287	0.1607	0.5785	684	0.280702	0.175439	0.251462	0.292398	0.532164	0.426901	0.0555556	0.0511696	0.0789474	0.0789474
NP001018494_NM020936	9698	PUM1	PUM1	NP001018494.1	1188	126679	0.0984848	0.010101	0.043771	0.0395623	0.0328283	0.0976431	0.0294613	0.0328283	0.0345118	0.0833333	0.0210438	0.0505051	0.0673401	0.0824916	0.0395623	0.0984848	0.0395623	0.0648148	0.00505051	0.0286195	0.985	0.9743	1.0509	0.5224	5.9804	-0.0092	1.4803	0.1035	1.0041	3.0287	0.1607	0.5785	1803	0.295618	0.214642	0.273988	0.215752	0.569606	0.48863	0.0798669	0.0388242	0.0909595	0.0576816
NP001018494_NM001134709	9698	PUM1	PUM1	NP001018494.1	1188	126679	0.0984848	0.010101	0.043771	0.0395623	0.0328283	0.0976431	0.0294613	0.0328283	0.0345118	0.0833333	0.0210438	0.0505051	0.0673401	0.0824916	0.0395623	0.0984848	0.0395623	0.0648148	0.00505051	0.0286195	0.985	0.9743	1.0509	0.5224	5.9804	-0.0092	1.4803	0.1035	1.0041	3.0287	0.1607	0.5785	1026	0.403509	0.158869	0.238791	0.19883	0.6423	0.397661	0.126706	0.0419103	0.111111	0.0555556
NP001018494_NM014856	9698	PUM1	PUM1	NP001018494.1	1188	126679	0.0984848	0.010101	0.043771	0.0395623	0.0328283	0.0976431	0.0294613	0.0328283	0.0345118	0.0833333	0.0210438	0.0505051	0.0673401	0.0824916	0.0395623	0.0984848	0.0395623	0.0648148	0.00505051	0.0286195	0.985	0.9743	1.0509	0.5224	5.9804	-0.0092	1.4803	0.1035	1.0041	3.0287	0.1607	0.5785	4491	0.177911	0.331107	0.288132	0.20285	0.466043	0.619238	0.0238254	0.0509909	0.0721443	0.0273881
NP001018494_NM017925	9698	PUM1	PUM1	NP001018494.1	1188	126679	0.0984848	0.010101	0.043771	0.0395623	0.0328283	0.0976431	0.0294613	0.0328283	0.0345118	0.0833333	0.0210438	0.0505051	0.0673401	0.0824916	0.0395623	0.0984848	0.0395623	0.0648148	0.00505051	0.0286195	0.985	0.9743	1.0509	0.5224	5.9804	-0.0092	1.4803	0.1035	1.0041	3.0287	0.1607	0.5785	5022	0.305854	0.197929	0.212664	0.283552	0.518519	0.410593	0.0696933	0.0503783	0.0858224	0.0726802
NP001018494_NM001145208	9698	PUM1	PUM1	NP001018494.1	1188	126679	0.0984848	0.010101	0.043771	0.0395623	0.0328283	0.0976431	0.0294613	0.0328283	0.0345118	0.0833333	0.0210438	0.0505051	0.0673401	0.0824916	0.0395623	0.0984848	0.0395623	0.0648148	0.00505051	0.0286195	0.985	0.9743	1.0509	0.5224	5.9804	-0.0092	1.4803	0.1035	1.0041	3.0287	0.1607	0.5785	1404	0.288462	0.207977	0.232194	0.271368	0.520655	0.440171	0.0683761	0.048433	0.0790598	0.0662393
NP001018494_NM003648	9698	PUM1	PUM1	NP001018494.1	1188	126679	0.0984848	0.010101	0.043771	0.0395623	0.0328283	0.0976431	0.0294613	0.0328283	0.0345118	0.0833333	0.0210438	0.0505051	0.0673401	0.0824916	0.0395623	0.0984848	0.0395623	0.0648148	0.00505051	0.0286195	0.985	0.9743	1.0509	0.5224	5.9804	-0.0092	1.4803	0.1035	1.0041	3.0287	0.1607	0.5785	3513	0.24452	0.274125	0.28665	0.194705	0.53117	0.560774	0.048961	0.0549388	0.0856818	0.0424139
NP001018494_NM030621	9698	PUM1	PUM1	NP001018494.1	1188	126679	0.0984848	0.010101	0.043771	0.0395623	0.0328283	0.0976431	0.0294613	0.0328283	0.0345118	0.0833333	0.0210438	0.0505051	0.0673401	0.0824916	0.0395623	0.0984848	0.0395623	0.0648148	0.00505051	0.0286195	0.985	0.9743	1.0509	0.5224	5.9804	-0.0092	1.4803	0.1035	1.0041	3.0287	0.1607	0.5785	5769	0.304559	0.207142	0.219969	0.268331	0.524528	0.42711	0.0729763	0.0566823	0.073843	0.075403
NP001018494_NM203486	9698	PUM1	PUM1	NP001018494.1	1188	126679	0.0984848	0.010101	0.043771	0.0395623	0.0328283	0.0976431	0.0294613	0.0328283	0.0345118	0.0833333	0.0210438	0.0505051	0.0673401	0.0824916	0.0395623	0.0984848	0.0395623	0.0648148	0.00505051	0.0286195	0.985	0.9743	1.0509	0.5224	5.9804	-0.0092	1.4803	0.1035	1.0041	3.0287	0.1607	0.5785	1764	0.123583	0.363946	0.336168	0.176304	0.459751	0.700113	0.0119048	0.0430839	0.0481859	0.0192744
NP001018494_NM001135110	9698	PUM1	PUM1	NP001018494.1	1188	126679	0.0984848	0.010101	0.043771	0.0395623	0.0328283	0.0976431	0.0294613	0.0328283	0.0345118	0.0833333	0.0210438	0.0505051	0.0673401	0.0824916	0.0395623	0.0984848	0.0395623	0.0648148	0.00505051	0.0286195	0.985	0.9743	1.0509	0.5224	5.9804	-0.0092	1.4803	0.1035	1.0041	3.0287	0.1607	0.5785	1362	0.243025	0.264317	0.296623	0.196035	0.539648	0.56094	0.041116	0.0521292	0.0866373	0.0484581
NP001018494_NM006145	9698	PUM1	PUM1	NP001018494.1	1188	126679	0.0984848	0.010101	0.043771	0.0395623	0.0328283	0.0976431	0.0294613	0.0328283	0.0345118	0.0833333	0.0210438	0.0505051	0.0673401	0.0824916	0.0395623	0.0984848	0.0395623	0.0648148	0.00505051	0.0286195	0.985	0.9743	1.0509	0.5224	5.9804	-0.0092	1.4803	0.1035	1.0041	3.0287	0.1607	0.5785	1023	0.259042	0.280547	0.27175	0.188661	0.530792	0.552297	0.0596285	0.0576735	0.0791789	0.0459433
NP001018494_NM015190	9698	PUM1	PUM1	NP001018494.1	1188	126679	0.0984848	0.010101	0.043771	0.0395623	0.0328283	0.0976431	0.0294613	0.0328283	0.0345118	0.0833333	0.0210438	0.0505051	0.0673401	0.0824916	0.0395623	0.0984848	0.0395623	0.0648148	0.00505051	0.0286195	0.985	0.9743	1.0509	0.5224	5.9804	-0.0092	1.4803	0.1035	1.0041	3.0287	0.1607	0.5785	783	0.306513	0.209451	0.302682	0.181354	0.609195	0.512133	0.0740741	0.0485313	0.104725	0.0485313
NP001018494_NM001380	9698	PUM1	PUM1	NP001018494.1	1188	126679	0.0984848	0.010101	0.043771	0.0395623	0.0328283	0.0976431	0.0294613	0.0328283	0.0345118	0.0833333	0.0210438	0.0505051	0.0673401	0.0824916	0.0395623	0.0984848	0.0395623	0.0648148	0.00505051	0.0286195	0.985	0.9743	1.0509	0.5224	5.9804	-0.0092	1.4803	0.1035	1.0041	3.0287	0.1607	0.5785	5598	0.292605	0.232226	0.248482	0.226688	0.541086	0.480707	0.0678814	0.0591283	0.0803859	0.0614505
NP001018494_NM006052	9698	PUM1	PUM1	NP001018494.1	1188	126679	0.0984848	0.010101	0.043771	0.0395623	0.0328283	0.0976431	0.0294613	0.0328283	0.0345118	0.0833333	0.0210438	0.0505051	0.0673401	0.0824916	0.0395623	0.0984848	0.0395623	0.0648148	0.00505051	0.0286195	0.985	0.9743	1.0509	0.5224	5.9804	-0.0092	1.4803	0.1035	1.0041	3.0287	0.1607	0.5785	894	0.257271	0.248322	0.257271	0.237136	0.514541	0.505593	0.0581655	0.0615213	0.0715884	0.049217
NP001018494_NM016448	9698	PUM1	PUM1	NP001018494.1	1188	126679	0.0984848	0.010101	0.043771	0.0395623	0.0328283	0.0976431	0.0294613	0.0328283	0.0345118	0.0833333	0.0210438	0.0505051	0.0673401	0.0824916	0.0395623	0.0984848	0.0395623	0.0648148	0.00505051	0.0286195	0.985	0.9743	1.0509	0.5224	5.9804	-0.0092	1.4803	0.1035	1.0041	3.0287	0.1607	0.5785	2193	0.281806	0.243502	0.22207	0.252622	0.503876	0.465572	0.0702234	0.0524396	0.0811674	0.0542636
NP001018494_NM001144955	9698	PUM1	PUM1	NP001018494.1	1188	126679	0.0984848	0.010101	0.043771	0.0395623	0.0328283	0.0976431	0.0294613	0.0328283	0.0345118	0.0833333	0.0210438	0.0505051	0.0673401	0.0824916	0.0395623	0.0984848	0.0395623	0.0648148	0.00505051	0.0286195	0.985	0.9743	1.0509	0.5224	5.9804	-0.0092	1.4803	0.1035	1.0041	3.0287	0.1607	0.5785	915	0.37377	0.183607	0.163934	0.278689	0.537705	0.347541	0.107104	0.063388	0.0666667	0.0852459
NP001018494_NM004417	9698	PUM1	PUM1	NP001018494.1	1188	126679	0.0984848	0.010101	0.043771	0.0395623	0.0328283	0.0976431	0.0294613	0.0328283	0.0345118	0.0833333	0.0210438	0.0505051	0.0673401	0.0824916	0.0395623	0.0984848	0.0395623	0.0648148	0.00505051	0.0286195	0.985	0.9743	1.0509	0.5224	5.9804	-0.0092	1.4803	0.1035	1.0041	3.0287	0.1607	0.5785	1104	0.177536	0.336957	0.288043	0.197464	0.46558	0.625	0.0280797	0.0525362	0.0615942	0.0317029
NP001018494_NM001949	9698	PUM1	PUM1	NP001018494.1	1188	126679	0.0984848	0.010101	0.043771	0.0395623	0.0328283	0.0976431	0.0294613	0.0328283	0.0345118	0.0833333	0.0210438	0.0505051	0.0673401	0.0824916	0.0395623	0.0984848	0.0395623	0.0648148	0.00505051	0.0286195	0.985	0.9743	1.0509	0.5224	5.9804	-0.0092	1.4803	0.1035	1.0041	3.0287	0.1607	0.5785	1398	0.270386	0.291845	0.252504	0.185265	0.52289	0.544349	0.0658083	0.0550787	0.0822604	0.0400572
NP001018494_NM001950	9698	PUM1	PUM1	NP001018494.1	1188	126679	0.0984848	0.010101	0.043771	0.0395623	0.0328283	0.0976431	0.0294613	0.0328283	0.0345118	0.0833333	0.0210438	0.0505051	0.0673401	0.0824916	0.0395623	0.0984848	0.0395623	0.0648148	0.00505051	0.0286195	0.985	0.9743	1.0509	0.5224	5.9804	-0.0092	1.4803	0.1035	1.0041	3.0287	0.1607	0.5785	1242	0.232689	0.298712	0.279388	0.189211	0.512077	0.5781	0.0394525	0.057971	0.0982287	0.0305958
NP001018494_NM001083589	9698	PUM1	PUM1	NP001018494.1	1188	126679	0.0984848	0.010101	0.043771	0.0395623	0.0328283	0.0976431	0.0294613	0.0328283	0.0345118	0.0833333	0.0210438	0.0505051	0.0673401	0.0824916	0.0395623	0.0984848	0.0395623	0.0648148	0.00505051	0.0286195	0.985	0.9743	1.0509	0.5224	5.9804	-0.0092	1.4803	0.1035	1.0041	3.0287	0.1607	0.5785	558	0.290323	0.231183	0.188172	0.290323	0.478495	0.419355	0.0555556	0.0555556	0.0716846	0.0896057
NP001018494_NM198256	9698	PUM1	PUM1	NP001018494.1	1188	126679	0.0984848	0.010101	0.043771	0.0395623	0.0328283	0.0976431	0.0294613	0.0328283	0.0345118	0.0833333	0.0210438	0.0505051	0.0673401	0.0824916	0.0395623	0.0984848	0.0395623	0.0648148	0.00505051	0.0286195	0.985	0.9743	1.0509	0.5224	5.9804	-0.0092	1.4803	0.1035	1.0041	3.0287	0.1607	0.5785	846	0.316785	0.202128	0.247045	0.234043	0.56383	0.449173	0.0791962	0.0460993	0.0969267	0.070922
NP001018494_NM004424	9698	PUM1	PUM1	NP001018494.1	1188	126679	0.0984848	0.010101	0.043771	0.0395623	0.0328283	0.0976431	0.0294613	0.0328283	0.0345118	0.0833333	0.0210438	0.0505051	0.0673401	0.0824916	0.0395623	0.0984848	0.0395623	0.0648148	0.00505051	0.0286195	0.985	0.9743	1.0509	0.5224	5.9804	-0.0092	1.4803	0.1035	1.0041	3.0287	0.1607	0.5785	2355	0.2	0.319321	0.335032	0.145648	0.535032	0.654352	0.0229299	0.0569002	0.0929936	0.0246284
NP001018494_NM198120	9698	PUM1	PUM1	NP001018494.1	1188	126679	0.0984848	0.010101	0.043771	0.0395623	0.0328283	0.0976431	0.0294613	0.0328283	0.0345118	0.0833333	0.0210438	0.0505051	0.0673401	0.0824916	0.0395623	0.0984848	0.0395623	0.0648148	0.00505051	0.0286195	0.985	0.9743	1.0509	0.5224	5.9804	-0.0092	1.4803	0.1035	1.0041	3.0287	0.1607	0.5785	642	0.372274	0.176012	0.228972	0.222741	0.601246	0.404984	0.105919	0.0638629	0.104361	0.0700935
NP001018494_NM018098	9698	PUM1	PUM1	NP001018494.1	1188	126679	0.0984848	0.010101	0.043771	0.0395623	0.0328283	0.0976431	0.0294613	0.0328283	0.0345118	0.0833333	0.0210438	0.0505051	0.0673401	0.0824916	0.0395623	0.0984848	0.0395623	0.0648148	0.00505051	0.0286195	0.985	0.9743	1.0509	0.5224	5.9804	-0.0092	1.4803	0.1035	1.0041	3.0287	0.1607	0.5785	2652	0.33371	0.18552	0.203997	0.276772	0.537707	0.389517	0.0863499	0.0497738	0.0882353	0.0754148
NP001018494_NM014674	9698	PUM1	PUM1	NP001018494.1	1188	126679	0.0984848	0.010101	0.043771	0.0395623	0.0328283	0.0976431	0.0294613	0.0328283	0.0345118	0.0833333	0.0210438	0.0505051	0.0673401	0.0824916	0.0395623	0.0984848	0.0395623	0.0648148	0.00505051	0.0286195	0.985	0.9743	1.0509	0.5224	5.9804	-0.0092	1.4803	0.1035	1.0041	3.0287	0.1607	0.5785	1974	0.236575	0.264438	0.276089	0.222898	0.512665	0.540527	0.0466059	0.0567376	0.0658561	0.0567376
NP001018494_NM003797	9698	PUM1	PUM1	NP001018494.1	1188	126679	0.0984848	0.010101	0.043771	0.0395623	0.0328283	0.0976431	0.0294613	0.0328283	0.0345118	0.0833333	0.0210438	0.0505051	0.0673401	0.0824916	0.0395623	0.0984848	0.0395623	0.0648148	0.00505051	0.0286195	0.985	0.9743	1.0509	0.5224	5.9804	-0.0092	1.4803	0.1035	1.0041	3.0287	0.1607	0.5785	1326	0.320513	0.170437	0.233786	0.275264	0.554299	0.404223	0.0784314	0.0452489	0.0701357	0.0972851
NP001018494_NM182685	9698	PUM1	PUM1	NP001018494.1	1188	126679	0.0984848	0.010101	0.043771	0.0395623	0.0328283	0.0976431	0.0294613	0.0328283	0.0345118	0.0833333	0.0210438	0.0505051	0.0673401	0.0824916	0.0395623	0.0984848	0.0395623	0.0648148	0.00505051	0.0286195	0.985	0.9743	1.0509	0.5224	5.9804	-0.0092	1.4803	0.1035	1.0041	3.0287	0.1607	0.5785	552	0.226449	0.309783	0.251812	0.211957	0.478261	0.561594	0.0326087	0.0706522	0.0778986	0.0380435
NP001018494_NM003907	9698	PUM1	PUM1	NP001018494.1	1188	126679	0.0984848	0.010101	0.043771	0.0395623	0.0328283	0.0976431	0.0294613	0.0328283	0.0345118	0.0833333	0.0210438	0.0505051	0.0673401	0.0824916	0.0395623	0.0984848	0.0395623	0.0648148	0.00505051	0.0286195	0.985	0.9743	1.0509	0.5224	5.9804	-0.0092	1.4803	0.1035	1.0041	3.0287	0.1607	0.5785	2166	0.251154	0.245614	0.276547	0.226685	0.527701	0.522161	0.0503232	0.0521699	0.0821791	0.0521699
NP001018494_NM020390	9698	PUM1	PUM1	NP001018494.1	1188	126679	0.0984848	0.010101	0.043771	0.0395623	0.0328283	0.0976431	0.0294613	0.0328283	0.0345118	0.0833333	0.0210438	0.0505051	0.0673401	0.0824916	0.0395623	0.0984848	0.0395623	0.0648148	0.00505051	0.0286195	0.985	0.9743	1.0509	0.5224	5.9804	-0.0092	1.4803	0.1035	1.0041	3.0287	0.1607	0.5785	462	0.324675	0.188312	0.235931	0.251082	0.560606	0.424242	0.0865801	0.0519481	0.0606061	0.0844156
NP001018494_NM001145353	9698	PUM1	PUM1	NP001018494.1	1188	126679	0.0984848	0.010101	0.043771	0.0395623	0.0328283	0.0976431	0.0294613	0.0328283	0.0345118	0.0833333	0.0210438	0.0505051	0.0673401	0.0824916	0.0395623	0.0984848	0.0395623	0.0648148	0.00505051	0.0286195	0.985	0.9743	1.0509	0.5224	5.9804	-0.0092	1.4803	0.1035	1.0041	3.0287	0.1607	0.5785	1788	0.314318	0.225951	0.222036	0.237696	0.536353	0.447987	0.0710291	0.0604027	0.0861298	0.0654362
NP001018494_NM005229	9698	PUM1	PUM1	NP001018494.1	1188	126679	0.0984848	0.010101	0.043771	0.0395623	0.0328283	0.0976431	0.0294613	0.0328283	0.0345118	0.0833333	0.0210438	0.0505051	0.0673401	0.0824916	0.0395623	0.0984848	0.0395623	0.0648148	0.00505051	0.0286195	0.985	0.9743	1.0509	0.5224	5.9804	-0.0092	1.4803	0.1035	1.0041	3.0287	0.1607	0.5785	1287	0.19425	0.331002	0.302253	0.172494	0.496503	0.633256	0.031857	0.042735	0.0839161	0.030303
NP001018494_NM012081	9698	PUM1	PUM1	NP001018494.1	1188	126679	0.0984848	0.010101	0.043771	0.0395623	0.0328283	0.0976431	0.0294613	0.0328283	0.0345118	0.0833333	0.0210438	0.0505051	0.0673401	0.0824916	0.0395623	0.0984848	0.0395623	0.0648148	0.00505051	0.0286195	0.985	0.9743	1.0509	0.5224	5.9804	-0.0092	1.4803	0.1035	1.0041	3.0287	0.1607	0.5785	1923	0.326573	0.24025	0.213729	0.219449	0.540302	0.453978	0.0826833	0.0582423	0.0863235	0.0660426
NP001018494_NM019040	9698	PUM1	PUM1	NP001018494.1	1188	126679	0.0984848	0.010101	0.043771	0.0395623	0.0328283	0.0976431	0.0294613	0.0328283	0.0345118	0.0833333	0.0210438	0.0505051	0.0673401	0.0824916	0.0395623	0.0984848	0.0395623	0.0648148	0.00505051	0.0286195	0.985	0.9743	1.0509	0.5224	5.9804	-0.0092	1.4803	0.1035	1.0041	3.0287	0.1607	0.5785	1275	0.290196	0.217255	0.22902	0.263529	0.519216	0.446275	0.0666667	0.0494118	0.0752941	0.08
NP001018494_NM207168	9698	PUM1	PUM1	NP001018494.1	1188	126679	0.0984848	0.010101	0.043771	0.0395623	0.0328283	0.0976431	0.0294613	0.0328283	0.0345118	0.0833333	0.0210438	0.0505051	0.0673401	0.0824916	0.0395623	0.0984848	0.0395623	0.0648148	0.00505051	0.0286195	0.985	0.9743	1.0509	0.5224	5.9804	-0.0092	1.4803	0.1035	1.0041	3.0287	0.1607	0.5785	318	0.308176	0.188679	0.292453	0.210692	0.600629	0.481132	0.0754717	0.0377358	0.132075	0.0314465
NP001018494_NM000121	9698	PUM1	PUM1	NP001018494.1	1188	126679	0.0984848	0.010101	0.043771	0.0395623	0.0328283	0.0976431	0.0294613	0.0328283	0.0345118	0.0833333	0.0210438	0.0505051	0.0673401	0.0824916	0.0395623	0.0984848	0.0395623	0.0648148	0.00505051	0.0286195	0.985	0.9743	1.0509	0.5224	5.9804	-0.0092	1.4803	0.1035	1.0041	3.0287	0.1607	0.5785	1527	0.1611	0.336608	0.307793	0.194499	0.468893	0.644401	0.0183366	0.0478062	0.0667976	0.0261952
NP001018494_NM001159969	9698	PUM1	PUM1	NP001018494.1	1188	126679	0.0984848	0.010101	0.043771	0.0395623	0.0328283	0.0976431	0.0294613	0.0328283	0.0345118	0.0833333	0.0210438	0.0505051	0.0673401	0.0824916	0.0395623	0.0984848	0.0395623	0.0648148	0.00505051	0.0286195	0.985	0.9743	1.0509	0.5224	5.9804	-0.0092	1.4803	0.1035	1.0041	3.0287	0.1607	0.5785	1749	0.328188	0.208691	0.222413	0.240709	0.5506	0.431103	0.0823328	0.0526015	0.0971984	0.0668954
NP001018494_NM000122	9698	PUM1	PUM1	NP001018494.1	1188	126679	0.0984848	0.010101	0.043771	0.0395623	0.0328283	0.0976431	0.0294613	0.0328283	0.0345118	0.0833333	0.0210438	0.0505051	0.0673401	0.0824916	0.0395623	0.0984848	0.0395623	0.0648148	0.00505051	0.0286195	0.985	0.9743	1.0509	0.5224	5.9804	-0.0092	1.4803	0.1035	1.0041	3.0287	0.1607	0.5785	2349	0.271179	0.248191	0.262665	0.217965	0.533844	0.510856	0.060877	0.0570456	0.0783312	0.0553427
NP001018494_NM005239	9698	PUM1	PUM1	NP001018494.1	1188	126679	0.0984848	0.010101	0.043771	0.0395623	0.0328283	0.0976431	0.0294613	0.0328283	0.0345118	0.0833333	0.0210438	0.0505051	0.0673401	0.0824916	0.0395623	0.0984848	0.0395623	0.0648148	0.00505051	0.0286195	0.985	0.9743	1.0509	0.5224	5.9804	-0.0092	1.4803	0.1035	1.0041	3.0287	0.1607	0.5785	1410	0.256028	0.271631	0.256738	0.215603	0.512766	0.528369	0.0588652	0.0609929	0.0808511	0.041844
NP001018494_NM001178096	9698	PUM1	PUM1	NP001018494.1	1188	126679	0.0984848	0.010101	0.043771	0.0395623	0.0328283	0.0976431	0.0294613	0.0328283	0.0345118	0.0833333	0.0210438	0.0505051	0.0673401	0.0824916	0.0395623	0.0984848	0.0395623	0.0648148	0.00505051	0.0286195	0.985	0.9743	1.0509	0.5224	5.9804	-0.0092	1.4803	0.1035	1.0041	3.0287	0.1607	0.5785	717	0.27894	0.238494	0.249651	0.232915	0.528591	0.488145	0.0655509	0.0711297	0.0739191	0.0502092
NP001018494_NM031452	9698	PUM1	PUM1	NP001018494.1	1188	126679	0.0984848	0.010101	0.043771	0.0395623	0.0328283	0.0976431	0.0294613	0.0328283	0.0345118	0.0833333	0.0210438	0.0505051	0.0673401	0.0824916	0.0395623	0.0984848	0.0395623	0.0648148	0.00505051	0.0286195	0.985	0.9743	1.0509	0.5224	5.9804	-0.0092	1.4803	0.1035	1.0041	3.0287	0.1607	0.5785	357	0.32493	0.226891	0.252101	0.196078	0.577031	0.478992	0.0784314	0.0840336	0.0868347	0.0588235
NP001018494_NM019018	9698	PUM1	PUM1	NP001018494.1	1188	126679	0.0984848	0.010101	0.043771	0.0395623	0.0328283	0.0976431	0.0294613	0.0328283	0.0345118	0.0833333	0.0210438	0.0505051	0.0673401	0.0824916	0.0395623	0.0984848	0.0395623	0.0648148	0.00505051	0.0286195	0.985	0.9743	1.0509	0.5224	5.9804	-0.0092	1.4803	0.1035	1.0041	3.0287	0.1607	0.5785	1071	0.291317	0.195145	0.244631	0.268908	0.535948	0.439776	0.0644258	0.0504202	0.0868347	0.070028
NP001018494_NM031453	9698	PUM1	PUM1	NP001018494.1	1188	126679	0.0984848	0.010101	0.043771	0.0395623	0.0328283	0.0976431	0.0294613	0.0328283	0.0345118	0.0833333	0.0210438	0.0505051	0.0673401	0.0824916	0.0395623	0.0984848	0.0395623	0.0648148	0.00505051	0.0286195	0.985	0.9743	1.0509	0.5224	5.9804	-0.0092	1.4803	0.1035	1.0041	3.0287	0.1607	0.5785	921	0.333333	0.241042	0.250814	0.17481	0.584148	0.491857	0.0933768	0.0477742	0.111835	0.0553746
NP001018494_NM014864	9698	PUM1	PUM1	NP001018494.1	1188	126679	0.0984848	0.010101	0.043771	0.0395623	0.0328283	0.0976431	0.0294613	0.0328283	0.0345118	0.0833333	0.0210438	0.0505051	0.0673401	0.0824916	0.0395623	0.0984848	0.0395623	0.0648148	0.00505051	0.0286195	0.985	0.9743	1.0509	0.5224	5.9804	-0.0092	1.4803	0.1035	1.0041	3.0287	0.1607	0.5785	1230	0.250407	0.244715	0.261789	0.243089	0.512195	0.506504	0.0463415	0.0577236	0.0739837	0.0569106
NP001018494_NM019054	9698	PUM1	PUM1	NP001018494.1	1188	126679	0.0984848	0.010101	0.043771	0.0395623	0.0328283	0.0976431	0.0294613	0.0328283	0.0345118	0.0833333	0.0210438	0.0505051	0.0673401	0.0824916	0.0395623	0.0984848	0.0395623	0.0648148	0.00505051	0.0286195	0.985	0.9743	1.0509	0.5224	5.9804	-0.0092	1.4803	0.1035	1.0041	3.0287	0.1607	0.5785	2508	0.330144	0.179426	0.204944	0.285486	0.535088	0.38437	0.0829346	0.0478469	0.0873206	0.0805423
NP001018494_NM033088	9698	PUM1	PUM1	NP001018494.1	1188	126679	0.0984848	0.010101	0.043771	0.0395623	0.0328283	0.0976431	0.0294613	0.0328283	0.0345118	0.0833333	0.0210438	0.0505051	0.0673401	0.0824916	0.0395623	0.0984848	0.0395623	0.0648148	0.00505051	0.0286195	0.985	0.9743	1.0509	0.5224	5.9804	-0.0092	1.4803	0.1035	1.0041	3.0287	0.1607	0.5785	2514	0.249403	0.274065	0.277645	0.198886	0.527049	0.55171	0.0497216	0.0580748	0.0871122	0.0429594
NP001018494_NM138419	9698	PUM1	PUM1	NP001018494.1	1188	126679	0.0984848	0.010101	0.043771	0.0395623	0.0328283	0.0976431	0.0294613	0.0328283	0.0345118	0.0833333	0.0210438	0.0505051	0.0673401	0.0824916	0.0395623	0.0984848	0.0395623	0.0648148	0.00505051	0.0286195	0.985	0.9743	1.0509	0.5224	5.9804	-0.0092	1.4803	0.1035	1.0041	3.0287	0.1607	0.5785	1158	0.310881	0.199482	0.2038	0.285838	0.51468	0.403282	0.0794473	0.0431779	0.074266	0.0803109
NP001018494_NM001135812	9698	PUM1	PUM1	NP001018494.1	1188	126679	0.0984848	0.010101	0.043771	0.0395623	0.0328283	0.0976431	0.0294613	0.0328283	0.0345118	0.0833333	0.0210438	0.0505051	0.0673401	0.0824916	0.0395623	0.0984848	0.0395623	0.0648148	0.00505051	0.0286195	0.985	0.9743	1.0509	0.5224	5.9804	-0.0092	1.4803	0.1035	1.0041	3.0287	0.1607	0.5785	666	0.309309	0.216216	0.232733	0.241742	0.542042	0.448949	0.0720721	0.0525526	0.0975976	0.0555556
NP001018494_NM144664	9698	PUM1	PUM1	NP001018494.1	1188	126679	0.0984848	0.010101	0.043771	0.0395623	0.0328283	0.0976431	0.0294613	0.0328283	0.0345118	0.0833333	0.0210438	0.0505051	0.0673401	0.0824916	0.0395623	0.0984848	0.0395623	0.0648148	0.00505051	0.0286195	0.985	0.9743	1.0509	0.5224	5.9804	-0.0092	1.4803	0.1035	1.0041	3.0287	0.1607	0.5785	1020	0.369608	0.208824	0.202941	0.218627	0.572549	0.411765	0.102941	0.0607843	0.0960784	0.0647059
NP001018494_NM001083537	9698	PUM1	PUM1	NP001018494.1	1188	126679	0.0984848	0.010101	0.043771	0.0395623	0.0328283	0.0976431	0.0294613	0.0328283	0.0345118	0.0833333	0.0210438	0.0505051	0.0673401	0.0824916	0.0395623	0.0984848	0.0395623	0.0648148	0.00505051	0.0286195	0.985	0.9743	1.0509	0.5224	5.9804	-0.0092	1.4803	0.1035	1.0041	3.0287	0.1607	0.5785	891	0.212121	0.298541	0.283951	0.205387	0.496072	0.582492	0.030303	0.0505051	0.0852974	0.0415264
NP001018494_NM152563	9698	PUM1	PUM1	NP001018494.1	1188	126679	0.0984848	0.010101	0.043771	0.0395623	0.0328283	0.0976431	0.0294613	0.0328283	0.0345118	0.0833333	0.0210438	0.0505051	0.0673401	0.0824916	0.0395623	0.0984848	0.0395623	0.0648148	0.00505051	0.0286195	0.985	0.9743	1.0509	0.5224	5.9804	-0.0092	1.4803	0.1035	1.0041	3.0287	0.1607	0.5785	396	0.214646	0.277778	0.305556	0.20202	0.520202	0.583333	0.0353535	0.0378788	0.0909091	0.040404
NP001018494_NM015002	9698	PUM1	PUM1	NP001018494.1	1188	126679	0.0984848	0.010101	0.043771	0.0395623	0.0328283	0.0976431	0.0294613	0.0328283	0.0345118	0.0833333	0.0210438	0.0505051	0.0673401	0.0824916	0.0395623	0.0984848	0.0395623	0.0648148	0.00505051	0.0286195	0.985	0.9743	1.0509	0.5224	5.9804	-0.0092	1.4803	0.1035	1.0041	3.0287	0.1607	0.5785	1866	0.260986	0.244373	0.275991	0.21865	0.536977	0.520364	0.0546624	0.0551983	0.0798499	0.0551983
NP001018494_NM032145	9698	PUM1	PUM1	NP001018494.1	1188	126679	0.0984848	0.010101	0.043771	0.0395623	0.0328283	0.0976431	0.0294613	0.0328283	0.0345118	0.0833333	0.0210438	0.0505051	0.0673401	0.0824916	0.0395623	0.0984848	0.0395623	0.0648148	0.00505051	0.0286195	0.985	0.9743	1.0509	0.5224	5.9804	-0.0092	1.4803	0.1035	1.0041	3.0287	0.1607	0.5785	2238	0.293566	0.184093	0.233691	0.288651	0.527256	0.417784	0.0656836	0.0446828	0.0755139	0.0853441
NP001018494_NM152231	9698	PUM1	PUM1	NP001018494.1	1188	126679	0.0984848	0.010101	0.043771	0.0395623	0.0328283	0.0976431	0.0294613	0.0328283	0.0345118	0.0833333	0.0210438	0.0505051	0.0673401	0.0824916	0.0395623	0.0984848	0.0395623	0.0648148	0.00505051	0.0286195	0.985	0.9743	1.0509	0.5224	5.9804	-0.0092	1.4803	0.1035	1.0041	3.0287	0.1607	0.5785	2136	0.279963	0.223783	0.258427	0.237828	0.53839	0.48221	0.0636704	0.042603	0.0912921	0.0533708
NP001018494_NM012176	9698	PUM1	PUM1	NP001018494.1	1188	126679	0.0984848	0.010101	0.043771	0.0395623	0.0328283	0.0976431	0.0294613	0.0328283	0.0345118	0.0833333	0.0210438	0.0505051	0.0673401	0.0824916	0.0395623	0.0984848	0.0395623	0.0648148	0.00505051	0.0286195	0.985	0.9743	1.0509	0.5224	5.9804	-0.0092	1.4803	0.1035	1.0041	3.0287	0.1607	0.5785	1164	0.272337	0.196735	0.251718	0.27921	0.524055	0.448454	0.0627148	0.0420962	0.0747423	0.0764605
NP001018494_NM012177	9698	PUM1	PUM1	NP001018494.1	1188	126679	0.0984848	0.010101	0.043771	0.0395623	0.0328283	0.0976431	0.0294613	0.0328283	0.0345118	0.0833333	0.0210438	0.0505051	0.0673401	0.0824916	0.0395623	0.0984848	0.0395623	0.0648148	0.00505051	0.0286195	0.985	0.9743	1.0509	0.5224	5.9804	-0.0092	1.4803	0.1035	1.0041	3.0287	0.1607	0.5785	1344	0.334821	0.213542	0.207589	0.244048	0.542411	0.421131	0.0915179	0.0580357	0.0796131	0.0662202
NP001018494_NM015322	9698	PUM1	PUM1	NP001018494.1	1188	126679	0.0984848	0.010101	0.043771	0.0395623	0.0328283	0.0976431	0.0294613	0.0328283	0.0345118	0.0833333	0.0210438	0.0505051	0.0673401	0.0824916	0.0395623	0.0984848	0.0395623	0.0648148	0.00505051	0.0286195	0.985	0.9743	1.0509	0.5224	5.9804	-0.0092	1.4803	0.1035	1.0041	3.0287	0.1607	0.5785	1884	0.288217	0.223992	0.231953	0.255839	0.52017	0.455945	0.0647558	0.0599788	0.066879	0.0774947
NP001018494_NM001171888	9698	PUM1	PUM1	NP001018494.1	1188	126679	0.0984848	0.010101	0.043771	0.0395623	0.0328283	0.0976431	0.0294613	0.0328283	0.0345118	0.0833333	0.0210438	0.0505051	0.0673401	0.0824916	0.0395623	0.0984848	0.0395623	0.0648148	0.00505051	0.0286195	0.985	0.9743	1.0509	0.5224	5.9804	-0.0092	1.4803	0.1035	1.0041	3.0287	0.1607	0.5785	519	0.373796	0.196532	0.223507	0.206166	0.597303	0.420039	0.105973	0.0655106	0.0982659	0.0751445
NP001018494_NM175884	9698	PUM1	PUM1	NP001018494.1	1188	126679	0.0984848	0.010101	0.043771	0.0395623	0.0328283	0.0976431	0.0294613	0.0328283	0.0345118	0.0833333	0.0210438	0.0505051	0.0673401	0.0824916	0.0395623	0.0984848	0.0395623	0.0648148	0.00505051	0.0286195	0.985	0.9743	1.0509	0.5224	5.9804	-0.0092	1.4803	0.1035	1.0041	3.0287	0.1607	0.5785	708	0.139831	0.381356	0.362994	0.115819	0.502825	0.74435	0.0169492	0.0409605	0.0677966	0.0127119
NP001018494_NM001459	9698	PUM1	PUM1	NP001018494.1	1188	126679	0.0984848	0.010101	0.043771	0.0395623	0.0328283	0.0976431	0.0294613	0.0328283	0.0345118	0.0833333	0.0210438	0.0505051	0.0673401	0.0824916	0.0395623	0.0984848	0.0395623	0.0648148	0.00505051	0.0286195	0.985	0.9743	1.0509	0.5224	5.9804	-0.0092	1.4803	0.1035	1.0041	3.0287	0.1607	0.5785	708	0.162429	0.377119	0.275424	0.185028	0.437853	0.652542	0.0225989	0.0550847	0.0635593	0.0169492
NP001018494_NM001135095	9698	PUM1	PUM1	NP001018494.1	1188	126679	0.0984848	0.010101	0.043771	0.0395623	0.0328283	0.0976431	0.0294613	0.0328283	0.0345118	0.0833333	0.0210438	0.0505051	0.0673401	0.0824916	0.0395623	0.0984848	0.0395623	0.0648148	0.00505051	0.0286195	0.985	0.9743	1.0509	0.5224	5.9804	-0.0092	1.4803	0.1035	1.0041	3.0287	0.1607	0.5785	3615	0.278838	0.249239	0.239004	0.232918	0.517842	0.488243	0.0569848	0.06639	0.0807746	0.0567082
NP001018494_NM005253	9698	PUM1	PUM1	NP001018494.1	1188	126679	0.0984848	0.010101	0.043771	0.0395623	0.0328283	0.0976431	0.0294613	0.0328283	0.0345118	0.0833333	0.0210438	0.0505051	0.0673401	0.0824916	0.0395623	0.0984848	0.0395623	0.0648148	0.00505051	0.0286195	0.985	0.9743	1.0509	0.5224	5.9804	-0.0092	1.4803	0.1035	1.0041	3.0287	0.1607	0.5785	981	0.207951	0.328236	0.303772	0.160041	0.511723	0.632008	0.030581	0.0489297	0.0917431	0.0336391
NP001018494_NM001452	9698	PUM1	PUM1	NP001018494.1	1188	126679	0.0984848	0.010101	0.043771	0.0395623	0.0328283	0.0976431	0.0294613	0.0328283	0.0345118	0.0833333	0.0210438	0.0505051	0.0673401	0.0824916	0.0395623	0.0984848	0.0395623	0.0648148	0.00505051	0.0286195	0.985	0.9743	1.0509	0.5224	5.9804	-0.0092	1.4803	0.1035	1.0041	3.0287	0.1607	0.5785	1335	0.146067	0.403745	0.301873	0.148315	0.44794	0.705618	0.0187266	0.0479401	0.0539326	0.02397
NP001018494_NM202003	9698	PUM1	PUM1	NP001018494.1	1188	126679	0.0984848	0.010101	0.043771	0.0395623	0.0328283	0.0976431	0.0294613	0.0328283	0.0345118	0.0833333	0.0210438	0.0505051	0.0673401	0.0824916	0.0395623	0.0984848	0.0395623	0.0648148	0.00505051	0.0286195	0.985	0.9743	1.0509	0.5224	5.9804	-0.0092	1.4803	0.1035	1.0041	3.0287	0.1607	0.5785	2247	0.250556	0.310636	0.244326	0.194482	0.494882	0.554962	0.0520694	0.0574099	0.0872274	0.0404984
NP001018494_NM033260	9698	PUM1	PUM1	NP001018494.1	1188	126679	0.0984848	0.010101	0.043771	0.0395623	0.0328283	0.0976431	0.0294613	0.0328283	0.0345118	0.0833333	0.0210438	0.0505051	0.0673401	0.0824916	0.0395623	0.0984848	0.0395623	0.0648148	0.00505051	0.0286195	0.985	0.9743	1.0509	0.5224	5.9804	-0.0092	1.4803	0.1035	1.0041	3.0287	0.1607	0.5785	1212	0.124587	0.406766	0.357261	0.111386	0.481848	0.764026	0.0165016	0.0420792	0.0519802	0.0132013
NP001018494_NM004860	9698	PUM1	PUM1	NP001018494.1	1188	126679	0.0984848	0.010101	0.043771	0.0395623	0.0328283	0.0976431	0.0294613	0.0328283	0.0345118	0.0833333	0.0210438	0.0505051	0.0673401	0.0824916	0.0395623	0.0984848	0.0395623	0.0648148	0.00505051	0.0286195	0.985	0.9743	1.0509	0.5224	5.9804	-0.0092	1.4803	0.1035	1.0041	3.0287	0.1607	0.5785	2023	0.241226	0.263964	0.298566	0.196243	0.539792	0.562531	0.0504202	0.0484429	0.0865052	0.04696
NP001018494_NM153048	9698	PUM1	PUM1	NP001018494.1	1188	126679	0.0984848	0.010101	0.043771	0.0395623	0.0328283	0.0976431	0.0294613	0.0328283	0.0345118	0.0833333	0.0210438	0.0505051	0.0673401	0.0824916	0.0395623	0.0984848	0.0395623	0.0648148	0.00505051	0.0286195	0.985	0.9743	1.0509	0.5224	5.9804	-0.0092	1.4803	0.1035	1.0041	3.0287	0.1607	0.5785	1449	0.293996	0.241546	0.253968	0.21049	0.547964	0.495514	0.0628019	0.0724638	0.0828157	0.0545204
NP001018494_NM001011537	9698	PUM1	PUM1	NP001018494.1	1188	126679	0.0984848	0.010101	0.043771	0.0395623	0.0328283	0.0976431	0.0294613	0.0328283	0.0345118	0.0833333	0.0210438	0.0505051	0.0673401	0.0824916	0.0395623	0.0984848	0.0395623	0.0648148	0.00505051	0.0286195	0.985	0.9743	1.0509	0.5224	5.9804	-0.0092	1.4803	0.1035	1.0041	3.0287	0.1607	0.5785	879	0.34471	0.189989	0.244596	0.220705	0.589306	0.434585	0.0955631	0.0546075	0.101251	0.0602958
NP001018494_NM016655	9698	PUM1	PUM1	NP001018494.1	1188	126679	0.0984848	0.010101	0.043771	0.0395623	0.0328283	0.0976431	0.0294613	0.0328283	0.0345118	0.0833333	0.0210438	0.0505051	0.0673401	0.0824916	0.0395623	0.0984848	0.0395623	0.0648148	0.00505051	0.0286195	0.985	0.9743	1.0509	0.5224	5.9804	-0.0092	1.4803	0.1035	1.0041	3.0287	0.1607	0.5785	1047	0.317096	0.201528	0.231137	0.250239	0.548233	0.432665	0.069723	0.0630372	0.0878701	0.0754537
NP001018494_NM002048	9698	PUM1	PUM1	NP001018494.1	1188	126679	0.0984848	0.010101	0.043771	0.0395623	0.0328283	0.0976431	0.0294613	0.0328283	0.0345118	0.0833333	0.0210438	0.0505051	0.0673401	0.0824916	0.0395623	0.0984848	0.0395623	0.0648148	0.00505051	0.0286195	0.985	0.9743	1.0509	0.5224	5.9804	-0.0092	1.4803	0.1035	1.0041	3.0287	0.1607	0.5785	1038	0.126204	0.358382	0.38343	0.131985	0.509634	0.741811	0.0134875	0.0510597	0.0423892	0.0183044
NP001018494_NM001145662	9698	PUM1	PUM1	NP001018494.1	1188	126679	0.0984848	0.010101	0.043771	0.0395623	0.0328283	0.0976431	0.0294613	0.0328283	0.0345118	0.0833333	0.0210438	0.0505051	0.0673401	0.0824916	0.0395623	0.0984848	0.0395623	0.0648148	0.00505051	0.0286195	0.985	0.9743	1.0509	0.5224	5.9804	-0.0092	1.4803	0.1035	1.0041	3.0287	0.1607	0.5785	1401	0.199857	0.374019	0.275517	0.150607	0.475375	0.649536	0.0328337	0.0778016	0.0642398	0.0206995
NP001018494_NM020699	9698	PUM1	PUM1	NP001018494.1	1188	126679	0.0984848	0.010101	0.043771	0.0395623	0.0328283	0.0976431	0.0294613	0.0328283	0.0345118	0.0833333	0.0210438	0.0505051	0.0673401	0.0824916	0.0395623	0.0984848	0.0395623	0.0648148	0.00505051	0.0286195	0.985	0.9743	1.0509	0.5224	5.9804	-0.0092	1.4803	0.1035	1.0041	3.0287	0.1607	0.5785	1782	0.280584	0.268238	0.241302	0.209877	0.521886	0.50954	0.0594837	0.0583614	0.0875421	0.0549944
NP001018494_NM001483	9698	PUM1	PUM1	NP001018494.1	1188	126679	0.0984848	0.010101	0.043771	0.0395623	0.0328283	0.0976431	0.0294613	0.0328283	0.0345118	0.0833333	0.0210438	0.0505051	0.0673401	0.0824916	0.0395623	0.0984848	0.0395623	0.0648148	0.00505051	0.0286195	0.985	0.9743	1.0509	0.5224	5.9804	-0.0092	1.4803	0.1035	1.0041	3.0287	0.1607	0.5785	861	0.286876	0.246225	0.250871	0.216028	0.537747	0.497096	0.0720093	0.0545877	0.0743322	0.0673635
NP001018494_NM004193	9698	PUM1	PUM1	NP001018494.1	1188	126679	0.0984848	0.010101	0.043771	0.0395623	0.0328283	0.0976431	0.0294613	0.0328283	0.0345118	0.0833333	0.0210438	0.0505051	0.0673401	0.0824916	0.0395623	0.0984848	0.0395623	0.0648148	0.00505051	0.0286195	0.985	0.9743	1.0509	0.5224	5.9804	-0.0092	1.4803	0.1035	1.0041	3.0287	0.1607	0.5785	5580	0.246416	0.281541	0.252867	0.219176	0.499283	0.534409	0.0437276	0.0577061	0.0801075	0.0543011
NP001018494_NM002061	9698	PUM1	PUM1	NP001018494.1	1188	126679	0.0984848	0.010101	0.043771	0.0395623	0.0328283	0.0976431	0.0294613	0.0328283	0.0345118	0.0833333	0.0210438	0.0505051	0.0673401	0.0824916	0.0395623	0.0984848	0.0395623	0.0648148	0.00505051	0.0286195	0.985	0.9743	1.0509	0.5224	5.9804	-0.0092	1.4803	0.1035	1.0041	3.0287	0.1607	0.5785	825	0.295758	0.220606	0.236364	0.247273	0.532121	0.45697	0.0787879	0.0509091	0.0763636	0.0606061
NP001018494_NM014030	9698	PUM1	PUM1	NP001018494.1	1188	126679	0.0984848	0.010101	0.043771	0.0395623	0.0328283	0.0976431	0.0294613	0.0328283	0.0345118	0.0833333	0.0210438	0.0505051	0.0673401	0.0824916	0.0395623	0.0984848	0.0395623	0.0648148	0.00505051	0.0286195	0.985	0.9743	1.0509	0.5224	5.9804	-0.0092	1.4803	0.1035	1.0041	3.0287	0.1607	0.5785	2286	0.225722	0.314961	0.297025	0.162292	0.522747	0.611986	0.0358705	0.0647419	0.0892388	0.0288714
NP001018494_NM138426	9698	PUM1	PUM1	NP001018494.1	1188	126679	0.0984848	0.010101	0.043771	0.0395623	0.0328283	0.0976431	0.0294613	0.0328283	0.0345118	0.0833333	0.0210438	0.0505051	0.0673401	0.0824916	0.0395623	0.0984848	0.0395623	0.0648148	0.00505051	0.0286195	0.985	0.9743	1.0509	0.5224	5.9804	-0.0092	1.4803	0.1035	1.0041	3.0287	0.1607	0.5785	1644	0.229319	0.319343	0.258516	0.192822	0.487835	0.577859	0.0444039	0.0486618	0.0827251	0.040146
NP001018494_NM152932	9698	PUM1	PUM1	NP001018494.1	1188	126679	0.0984848	0.010101	0.043771	0.0395623	0.0328283	0.0976431	0.0294613	0.0328283	0.0345118	0.0833333	0.0210438	0.0505051	0.0673401	0.0824916	0.0395623	0.0984848	0.0395623	0.0648148	0.00505051	0.0286195	0.985	0.9743	1.0509	0.5224	5.9804	-0.0092	1.4803	0.1035	1.0041	3.0287	0.1607	0.5785	1116	0.301971	0.22043	0.210573	0.267025	0.512545	0.431004	0.0716846	0.0591398	0.0645161	0.0797491
NP001018494_NM178439	9698	PUM1	PUM1	NP001018494.1	1188	126679	0.0984848	0.010101	0.043771	0.0395623	0.0328283	0.0976431	0.0294613	0.0328283	0.0345118	0.0833333	0.0210438	0.0505051	0.0673401	0.0824916	0.0395623	0.0984848	0.0395623	0.0648148	0.00505051	0.0286195	0.985	0.9743	1.0509	0.5224	5.9804	-0.0092	1.4803	0.1035	1.0041	3.0287	0.1607	0.5785	1548	0.29845	0.183463	0.247416	0.270672	0.545866	0.430879	0.0684755	0.0555556	0.0762274	0.0723514
NP001018494_NM002069	9698	PUM1	PUM1	NP001018494.1	1188	126679	0.0984848	0.010101	0.043771	0.0395623	0.0328283	0.0976431	0.0294613	0.0328283	0.0345118	0.0833333	0.0210438	0.0505051	0.0673401	0.0824916	0.0395623	0.0984848	0.0395623	0.0648148	0.00505051	0.0286195	0.985	0.9743	1.0509	0.5224	5.9804	-0.0092	1.4803	0.1035	1.0041	3.0287	0.1607	0.5785	1065	0.323944	0.18216	0.242254	0.251643	0.566197	0.424413	0.0807512	0.0544601	0.0835681	0.0788732
NP001018494_NM006578	9698	PUM1	PUM1	NP001018494.1	1188	126679	0.0984848	0.010101	0.043771	0.0395623	0.0328283	0.0976431	0.0294613	0.0328283	0.0345118	0.0833333	0.0210438	0.0505051	0.0673401	0.0824916	0.0395623	0.0984848	0.0395623	0.0648148	0.00505051	0.0286195	0.985	0.9743	1.0509	0.5224	5.9804	-0.0092	1.4803	0.1035	1.0041	3.0287	0.1607	0.5785	1062	0.229755	0.252354	0.304143	0.213748	0.533898	0.556497	0.039548	0.0574388	0.0649718	0.0508475
NP001018494_NM001017998	9698	PUM1	PUM1	NP001018494.1	1188	126679	0.0984848	0.010101	0.043771	0.0395623	0.0328283	0.0976431	0.0294613	0.0328283	0.0345118	0.0833333	0.0210438	0.0505051	0.0673401	0.0824916	0.0395623	0.0984848	0.0395623	0.0648148	0.00505051	0.0286195	0.985	0.9743	1.0509	0.5224	5.9804	-0.0092	1.4803	0.1035	1.0041	3.0287	0.1607	0.5785	207	0.193237	0.26087	0.323671	0.222222	0.516908	0.584541	0.0338164	0.0193237	0.10628	0.0289855
NP001018494_NM206826	9698	PUM1	PUM1	NP001018494.1	1188	126679	0.0984848	0.010101	0.043771	0.0395623	0.0328283	0.0976431	0.0294613	0.0328283	0.0345118	0.0833333	0.0210438	0.0505051	0.0673401	0.0824916	0.0395623	0.0984848	0.0395623	0.0648148	0.00505051	0.0286195	0.985	0.9743	1.0509	0.5224	5.9804	-0.0092	1.4803	0.1035	1.0041	3.0287	0.1607	0.5785	1614	0.33767	0.184634	0.251549	0.226146	0.589219	0.436183	0.0954151	0.0421314	0.101611	0.0600991
NP001018494_NM198066	9698	PUM1	PUM1	NP001018494.1	1188	126679	0.0984848	0.010101	0.043771	0.0395623	0.0328283	0.0976431	0.0294613	0.0328283	0.0345118	0.0833333	0.0210438	0.0505051	0.0673401	0.0824916	0.0395623	0.0984848	0.0395623	0.0648148	0.00505051	0.0286195	0.985	0.9743	1.0509	0.5224	5.9804	-0.0092	1.4803	0.1035	1.0041	3.0287	0.1607	0.5785	555	0.313514	0.165766	0.216216	0.304505	0.52973	0.381982	0.0756757	0.0558559	0.0810811	0.0720721
NP001018494_NM015530	9698	PUM1	PUM1	NP001018494.1	1188	126679	0.0984848	0.010101	0.043771	0.0395623	0.0328283	0.0976431	0.0294613	0.0328283	0.0345118	0.0833333	0.0210438	0.0505051	0.0673401	0.0824916	0.0395623	0.0984848	0.0395623	0.0648148	0.00505051	0.0286195	0.985	0.9743	1.0509	0.5224	5.9804	-0.0092	1.4803	0.1035	1.0041	3.0287	0.1607	0.5785	1359	0.261957	0.281089	0.219279	0.237675	0.481236	0.500368	0.0515085	0.071376	0.0691685	0.0515085
NP001018494_NM203506	9698	PUM1	PUM1	NP001018494.1	1188	126679	0.0984848	0.010101	0.043771	0.0395623	0.0328283	0.0976431	0.0294613	0.0328283	0.0345118	0.0833333	0.0210438	0.0505051	0.0673401	0.0824916	0.0395623	0.0984848	0.0395623	0.0648148	0.00505051	0.0286195	0.985	0.9743	1.0509	0.5224	5.9804	-0.0092	1.4803	0.1035	1.0041	3.0287	0.1607	0.5785	531	0.282486	0.242938	0.259887	0.214689	0.542373	0.502825	0.0621469	0.0621469	0.0753296	0.0640301
NP001018494_NM019884	9698	PUM1	PUM1	NP001018494.1	1188	126679	0.0984848	0.010101	0.043771	0.0395623	0.0328283	0.0976431	0.0294613	0.0328283	0.0345118	0.0833333	0.0210438	0.0505051	0.0673401	0.0824916	0.0395623	0.0984848	0.0395623	0.0648148	0.00505051	0.0286195	0.985	0.9743	1.0509	0.5224	5.9804	-0.0092	1.4803	0.1035	1.0041	3.0287	0.1607	0.5785	1452	0.205234	0.316804	0.289945	0.188017	0.495179	0.606749	0.0358127	0.0599174	0.0716253	0.0309917
NP001018494_NM001146156	9698	PUM1	PUM1	NP001018494.1	1188	126679	0.0984848	0.010101	0.043771	0.0395623	0.0328283	0.0976431	0.0294613	0.0328283	0.0345118	0.0833333	0.0210438	0.0505051	0.0673401	0.0824916	0.0395623	0.0984848	0.0395623	0.0648148	0.00505051	0.0286195	0.985	0.9743	1.0509	0.5224	5.9804	-0.0092	1.4803	0.1035	1.0041	3.0287	0.1607	0.5785	1263	0.284244	0.23753	0.230404	0.247823	0.514648	0.467933	0.0593824	0.064133	0.077593	0.0649248
NP001018494_NM001514	9698	PUM1	PUM1	NP001018494.1	1188	126679	0.0984848	0.010101	0.043771	0.0395623	0.0328283	0.0976431	0.0294613	0.0328283	0.0345118	0.0833333	0.0210438	0.0505051	0.0673401	0.0824916	0.0395623	0.0984848	0.0395623	0.0648148	0.00505051	0.0286195	0.985	0.9743	1.0509	0.5224	5.9804	-0.0092	1.4803	0.1035	1.0041	3.0287	0.1607	0.5785	951	0.298633	0.201893	0.23449	0.264984	0.533123	0.436383	0.0651945	0.0515247	0.0767613	0.0809674
NP001018494_NM005685	9698	PUM1	PUM1	NP001018494.1	1188	126679	0.0984848	0.010101	0.043771	0.0395623	0.0328283	0.0976431	0.0294613	0.0328283	0.0345118	0.0833333	0.0210438	0.0505051	0.0673401	0.0824916	0.0395623	0.0984848	0.0395623	0.0648148	0.00505051	0.0286195	0.985	0.9743	1.0509	0.5224	5.9804	-0.0092	1.4803	0.1035	1.0041	3.0287	0.1607	0.5785	2835	0.224691	0.302998	0.291711	0.1806	0.516402	0.594709	0.0447972	0.0507937	0.0811287	0.0412698
NP001018494_NM019096	9698	PUM1	PUM1	NP001018494.1	1188	126679	0.0984848	0.010101	0.043771	0.0395623	0.0328283	0.0976431	0.0294613	0.0328283	0.0345118	0.0833333	0.0210438	0.0505051	0.0673401	0.0824916	0.0395623	0.0984848	0.0395623	0.0648148	0.00505051	0.0286195	0.985	0.9743	1.0509	0.5224	5.9804	-0.0092	1.4803	0.1035	1.0041	3.0287	0.1607	0.5785	1809	0.231067	0.26921	0.310116	0.189608	0.541183	0.579326	0.0409066	0.0597015	0.0812604	0.039801
NP001018494_NM005318	9698	PUM1	PUM1	NP001018494.1	1188	126679	0.0984848	0.010101	0.043771	0.0395623	0.0328283	0.0976431	0.0294613	0.0328283	0.0345118	0.0833333	0.0210438	0.0505051	0.0673401	0.0824916	0.0395623	0.0984848	0.0395623	0.0648148	0.00505051	0.0286195	0.985	0.9743	1.0509	0.5224	5.9804	-0.0092	1.4803	0.1035	1.0041	3.0287	0.1607	0.5785	585	0.321368	0.311111	0.25641	0.111111	0.577778	0.567521	0.107692	0.0444444	0.116239	0.0239316
NP001018494_NM006402	9698	PUM1	PUM1	NP001018494.1	1188	126679	0.0984848	0.010101	0.043771	0.0395623	0.0328283	0.0976431	0.0294613	0.0328283	0.0345118	0.0833333	0.0210438	0.0505051	0.0673401	0.0824916	0.0395623	0.0984848	0.0395623	0.0648148	0.00505051	0.0286195	0.985	0.9743	1.0509	0.5224	5.9804	-0.0092	1.4803	0.1035	1.0041	3.0287	0.1607	0.5785	522	0.220307	0.250958	0.310345	0.218391	0.530651	0.561303	0.0421456	0.0517241	0.0708812	0.0478927
NP001018494_NM016217	9698	PUM1	PUM1	NP001018494.1	1188	126679	0.0984848	0.010101	0.043771	0.0395623	0.0328283	0.0976431	0.0294613	0.0328283	0.0345118	0.0833333	0.0210438	0.0505051	0.0673401	0.0824916	0.0395623	0.0984848	0.0395623	0.0648148	0.00505051	0.0286195	0.985	0.9743	1.0509	0.5224	5.9804	-0.0092	1.4803	0.1035	1.0041	3.0287	0.1607	0.5785	1632	0.212623	0.306373	0.316176	0.164828	0.528799	0.622549	0.0459559	0.0551471	0.0667892	0.0318627
NP001018494_NM015601	9698	PUM1	PUM1	NP001018494.1	1188	126679	0.0984848	0.010101	0.043771	0.0395623	0.0328283	0.0976431	0.0294613	0.0328283	0.0345118	0.0833333	0.0210438	0.0505051	0.0673401	0.0824916	0.0395623	0.0984848	0.0395623	0.0648148	0.00505051	0.0286195	0.985	0.9743	1.0509	0.5224	5.9804	-0.0092	1.4803	0.1035	1.0041	3.0287	0.1607	0.5785	3150	0.303175	0.173968	0.224444	0.298413	0.527619	0.398413	0.0726984	0.0466667	0.0742857	0.0831746
NP001018494_NM002729	9698	PUM1	PUM1	NP001018494.1	1188	126679	0.0984848	0.010101	0.043771	0.0395623	0.0328283	0.0976431	0.0294613	0.0328283	0.0345118	0.0833333	0.0210438	0.0505051	0.0673401	0.0824916	0.0395623	0.0984848	0.0395623	0.0648148	0.00505051	0.0286195	0.985	0.9743	1.0509	0.5224	5.9804	-0.0092	1.4803	0.1035	1.0041	3.0287	0.1607	0.5785	813	0.227552	0.337023	0.264453	0.170972	0.492005	0.601476	0.0479705	0.0590406	0.0664207	0.0356704
NP001018494_NM033055	9698	PUM1	PUM1	NP001018494.1	1188	126679	0.0984848	0.010101	0.043771	0.0395623	0.0328283	0.0976431	0.0294613	0.0328283	0.0345118	0.0833333	0.0210438	0.0505051	0.0673401	0.0824916	0.0395623	0.0984848	0.0395623	0.0648148	0.00505051	0.0286195	0.985	0.9743	1.0509	0.5224	5.9804	-0.0092	1.4803	0.1035	1.0041	3.0287	0.1607	0.5785	1473	0.24983	0.220638	0.230821	0.29871	0.480652	0.45146	0.0515954	0.0495587	0.0665309	0.0685675
NP001018494_NM032558	9698	PUM1	PUM1	NP001018494.1	1188	126679	0.0984848	0.010101	0.043771	0.0395623	0.0328283	0.0976431	0.0294613	0.0328283	0.0345118	0.0833333	0.0210438	0.0505051	0.0673401	0.0824916	0.0395623	0.0984848	0.0395623	0.0648148	0.00505051	0.0286195	0.985	0.9743	1.0509	0.5224	5.9804	-0.0092	1.4803	0.1035	1.0041	3.0287	0.1607	0.5785	1521	0.214333	0.241289	0.266272	0.278107	0.480605	0.507561	0.0361604	0.0394477	0.0703485	0.0598291
NP001018494_NM018200	9698	PUM1	PUM1	NP001018494.1	1188	126679	0.0984848	0.010101	0.043771	0.0395623	0.0328283	0.0976431	0.0294613	0.0328283	0.0345118	0.0833333	0.0210438	0.0505051	0.0673401	0.0824916	0.0395623	0.0984848	0.0395623	0.0648148	0.00505051	0.0286195	0.985	0.9743	1.0509	0.5224	5.9804	-0.0092	1.4803	0.1035	1.0041	3.0287	0.1607	0.5785	1044	0.32567	0.227969	0.255747	0.190613	0.581418	0.483716	0.0708812	0.0603448	0.114943	0.0565134
NP001018494_NM153715	9698	PUM1	PUM1	NP001018494.1	1188	126679	0.0984848	0.010101	0.043771	0.0395623	0.0328283	0.0976431	0.0294613	0.0328283	0.0345118	0.0833333	0.0210438	0.0505051	0.0673401	0.0824916	0.0395623	0.0984848	0.0395623	0.0648148	0.00505051	0.0286195	0.985	0.9743	1.0509	0.5224	5.9804	-0.0092	1.4803	0.1035	1.0041	3.0287	0.1607	0.5785	285	0.315789	0.242105	0.259649	0.182456	0.575439	0.501754	0.0877193	0.0666667	0.0947368	0.0385965
NP001018494_NM017410	9698	PUM1	PUM1	NP001018494.1	1188	126679	0.0984848	0.010101	0.043771	0.0395623	0.0328283	0.0976431	0.0294613	0.0328283	0.0345118	0.0833333	0.0210438	0.0505051	0.0673401	0.0824916	0.0395623	0.0984848	0.0395623	0.0648148	0.00505051	0.0286195	0.985	0.9743	1.0509	0.5224	5.9804	-0.0092	1.4803	0.1035	1.0041	3.0287	0.1607	0.5785	993	0.180262	0.361531	0.316213	0.141994	0.496475	0.677744	0.0271903	0.0523666	0.0715005	0.021148
NP001018494_NM006897	9698	PUM1	PUM1	NP001018494.1	1188	126679	0.0984848	0.010101	0.043771	0.0395623	0.0328283	0.0976431	0.0294613	0.0328283	0.0345118	0.0833333	0.0210438	0.0505051	0.0673401	0.0824916	0.0395623	0.0984848	0.0395623	0.0648148	0.00505051	0.0286195	0.985	0.9743	1.0509	0.5224	5.9804	-0.0092	1.4803	0.1035	1.0041	3.0287	0.1607	0.5785	783	0.203065	0.346105	0.291188	0.159642	0.494253	0.637292	0.0395913	0.0613027	0.063857	0.0293742
NP001018494_NM016287	9698	PUM1	PUM1	NP001018494.1	1188	126679	0.0984848	0.010101	0.043771	0.0395623	0.0328283	0.0976431	0.0294613	0.0328283	0.0345118	0.0833333	0.0210438	0.0505051	0.0673401	0.0824916	0.0395623	0.0984848	0.0395623	0.0648148	0.00505051	0.0286195	0.985	0.9743	1.0509	0.5224	5.9804	-0.0092	1.4803	0.1035	1.0041	3.0287	0.1607	0.5785	1662	0.33213	0.223827	0.248496	0.195548	0.580626	0.472323	0.0938628	0.0409146	0.112515	0.0493381
NP001018494_NM003806	9698	PUM1	PUM1	NP001018494.1	1188	126679	0.0984848	0.010101	0.043771	0.0395623	0.0328283	0.0976431	0.0294613	0.0328283	0.0345118	0.0833333	0.0210438	0.0505051	0.0673401	0.0824916	0.0395623	0.0984848	0.0395623	0.0648148	0.00505051	0.0286195	0.985	0.9743	1.0509	0.5224	5.9804	-0.0092	1.4803	0.1035	1.0041	3.0287	0.1607	0.5785	276	0.0833333	0.405797	0.391304	0.119565	0.474638	0.797101	0.00724638	0.0289855	0.0398551	0.00724638
NP001018494_NM002166	9698	PUM1	PUM1	NP001018494.1	1188	126679	0.0984848	0.010101	0.043771	0.0395623	0.0328283	0.0976431	0.0294613	0.0328283	0.0345118	0.0833333	0.0210438	0.0505051	0.0673401	0.0824916	0.0395623	0.0984848	0.0395623	0.0648148	0.00505051	0.0286195	0.985	0.9743	1.0509	0.5224	5.9804	-0.0092	1.4803	0.1035	1.0041	3.0287	0.1607	0.5785	405	0.261728	0.31358	0.239506	0.185185	0.501235	0.553086	0.0493827	0.0691358	0.0740741	0.0493827
NP001018494_NM005530	9698	PUM1	PUM1	NP001018494.1	1188	126679	0.0984848	0.010101	0.043771	0.0395623	0.0328283	0.0976431	0.0294613	0.0328283	0.0345118	0.0833333	0.0210438	0.0505051	0.0673401	0.0824916	0.0395623	0.0984848	0.0395623	0.0648148	0.00505051	0.0286195	0.985	0.9743	1.0509	0.5224	5.9804	-0.0092	1.4803	0.1035	1.0041	3.0287	0.1607	0.5785	1101	0.280654	0.206176	0.265213	0.247956	0.545867	0.47139	0.0626703	0.0499546	0.0744777	0.0735695
NP001018494_NM016097	9698	PUM1	PUM1	NP001018494.1	1188	126679	0.0984848	0.010101	0.043771	0.0395623	0.0328283	0.0976431	0.0294613	0.0328283	0.0345118	0.0833333	0.0210438	0.0505051	0.0673401	0.0824916	0.0395623	0.0984848	0.0395623	0.0648148	0.00505051	0.0286195	0.985	0.9743	1.0509	0.5224	5.9804	-0.0092	1.4803	0.1035	1.0041	3.0287	0.1607	0.5785	249	0.273092	0.208835	0.253012	0.26506	0.526104	0.461847	0.064257	0.0522088	0.064257	0.0803213
NP001018494_NM016545	9698	PUM1	PUM1	NP001018494.1	1188	126679	0.0984848	0.010101	0.043771	0.0395623	0.0328283	0.0976431	0.0294613	0.0328283	0.0345118	0.0833333	0.0210438	0.0505051	0.0673401	0.0824916	0.0395623	0.0984848	0.0395623	0.0648148	0.00505051	0.0286195	0.985	0.9743	1.0509	0.5224	5.9804	-0.0092	1.4803	0.1035	1.0041	3.0287	0.1607	0.5785	984	0.15752	0.349593	0.375	0.117886	0.53252	0.724593	0.0223577	0.0376016	0.0802846	0.0152439
NP001018494_NM005534	9698	PUM1	PUM1	NP001018494.1	1188	126679	0.0984848	0.010101	0.043771	0.0395623	0.0328283	0.0976431	0.0294613	0.0328283	0.0345118	0.0833333	0.0210438	0.0505051	0.0673401	0.0824916	0.0395623	0.0984848	0.0395623	0.0648148	0.00505051	0.0286195	0.985	0.9743	1.0509	0.5224	5.9804	-0.0092	1.4803	0.1035	1.0041	3.0287	0.1607	0.5785	1014	0.247535	0.278107	0.230769	0.24359	0.478304	0.508876	0.0512821	0.0591716	0.0710059	0.0502959
NP001018494_NM001550	9698	PUM1	PUM1	NP001018494.1	1188	126679	0.0984848	0.010101	0.043771	0.0395623	0.0328283	0.0976431	0.0294613	0.0328283	0.0345118	0.0833333	0.0210438	0.0505051	0.0673401	0.0824916	0.0395623	0.0984848	0.0395623	0.0648148	0.00505051	0.0286195	0.985	0.9743	1.0509	0.5224	5.9804	-0.0092	1.4803	0.1035	1.0041	3.0287	0.1607	0.5785	1356	0.30531	0.19469	0.243363	0.256637	0.548673	0.438053	0.0774336	0.0479351	0.0833333	0.0693215
NP001018494_NM001551	9698	PUM1	PUM1	NP001018494.1	1188	126679	0.0984848	0.010101	0.043771	0.0395623	0.0328283	0.0976431	0.0294613	0.0328283	0.0345118	0.0833333	0.0210438	0.0505051	0.0673401	0.0824916	0.0395623	0.0984848	0.0395623	0.0648148	0.00505051	0.0286195	0.985	0.9743	1.0509	0.5224	5.9804	-0.0092	1.4803	0.1035	1.0041	3.0287	0.1607	0.5785	1020	0.302941	0.223529	0.262745	0.210784	0.565686	0.486275	0.0696078	0.0539216	0.10098	0.0578431
NP001018494_NM030768	9698	PUM1	PUM1	NP001018494.1	1188	126679	0.0984848	0.010101	0.043771	0.0395623	0.0328283	0.0976431	0.0294613	0.0328283	0.0345118	0.0833333	0.0210438	0.0505051	0.0673401	0.0824916	0.0395623	0.0984848	0.0395623	0.0648148	0.00505051	0.0286195	0.985	0.9743	1.0509	0.5224	5.9804	-0.0092	1.4803	0.1035	1.0041	3.0287	0.1607	0.5785	1179	0.258694	0.237489	0.286684	0.217133	0.545377	0.524173	0.0585242	0.0441052	0.086514	0.0500424
NP001018494_NM001144879	9698	PUM1	PUM1	NP001018494.1	1188	126679	0.0984848	0.010101	0.043771	0.0395623	0.0328283	0.0976431	0.0294613	0.0328283	0.0345118	0.0833333	0.0210438	0.0505051	0.0673401	0.0824916	0.0395623	0.0984848	0.0395623	0.0648148	0.00505051	0.0286195	0.985	0.9743	1.0509	0.5224	5.9804	-0.0092	1.4803	0.1035	1.0041	3.0287	0.1607	0.5785	597	0.314908	0.157454	0.247906	0.279732	0.562814	0.40536	0.0938023	0.0435511	0.0670017	0.0753769
NP001018494_NM004136	9698	PUM1	PUM1	NP001018494.1	1188	126679	0.0984848	0.010101	0.043771	0.0395623	0.0328283	0.0976431	0.0294613	0.0328283	0.0345118	0.0833333	0.0210438	0.0505051	0.0673401	0.0824916	0.0395623	0.0984848	0.0395623	0.0648148	0.00505051	0.0286195	0.985	0.9743	1.0509	0.5224	5.9804	-0.0092	1.4803	0.1035	1.0041	3.0287	0.1607	0.5785	2892	0.303942	0.184302	0.220954	0.290802	0.524896	0.405256	0.074343	0.0473721	0.0757261	0.0764177
NP001018494_NM002198	9698	PUM1	PUM1	NP001018494.1	1188	126679	0.0984848	0.010101	0.043771	0.0395623	0.0328283	0.0976431	0.0294613	0.0328283	0.0345118	0.0833333	0.0210438	0.0505051	0.0673401	0.0824916	0.0395623	0.0984848	0.0395623	0.0648148	0.00505051	0.0286195	0.985	0.9743	1.0509	0.5224	5.9804	-0.0092	1.4803	0.1035	1.0041	3.0287	0.1607	0.5785	978	0.266871	0.270961	0.275051	0.187117	0.541922	0.546012	0.0470348	0.0572597	0.097137	0.0541922
NP001018494_NM003749	9698	PUM1	PUM1	NP001018494.1	1188	126679	0.0984848	0.010101	0.043771	0.0395623	0.0328283	0.0976431	0.0294613	0.0328283	0.0345118	0.0833333	0.0210438	0.0505051	0.0673401	0.0824916	0.0395623	0.0984848	0.0395623	0.0648148	0.00505051	0.0286195	0.985	0.9743	1.0509	0.5224	5.9804	-0.0092	1.4803	0.1035	1.0041	3.0287	0.1607	0.5785	4017	0.14812	0.397062	0.329599	0.125218	0.47772	0.726662	0.0199154	0.0517799	0.0597461	0.0149365
NP001018494_NM001134222	9698	PUM1	PUM1	NP001018494.1	1188	126679	0.0984848	0.010101	0.043771	0.0395623	0.0328283	0.0976431	0.0294613	0.0328283	0.0345118	0.0833333	0.0210438	0.0505051	0.0673401	0.0824916	0.0395623	0.0984848	0.0395623	0.0648148	0.00505051	0.0286195	0.985	0.9743	1.0509	0.5224	5.9804	-0.0092	1.4803	0.1035	1.0041	3.0287	0.1607	0.5785	1416	0.176554	0.382768	0.331215	0.109463	0.507768	0.713983	0.029661	0.0699153	0.0607345	0.0127119
NP001018494_NM024336	9698	PUM1	PUM1	NP001018494.1	1188	126679	0.0984848	0.010101	0.043771	0.0395623	0.0328283	0.0976431	0.0294613	0.0328283	0.0345118	0.0833333	0.0210438	0.0505051	0.0673401	0.0824916	0.0395623	0.0984848	0.0395623	0.0648148	0.00505051	0.0286195	0.985	0.9743	1.0509	0.5224	5.9804	-0.0092	1.4803	0.1035	1.0041	3.0287	0.1607	0.5785	1506	0.167331	0.371182	0.326029	0.135458	0.49336	0.697211	0.0265604	0.0504648	0.0683931	0.0179283
NP001018494_NM014288	9698	PUM1	PUM1	NP001018494.1	1188	126679	0.0984848	0.010101	0.043771	0.0395623	0.0328283	0.0976431	0.0294613	0.0328283	0.0345118	0.0833333	0.0210438	0.0505051	0.0673401	0.0824916	0.0395623	0.0984848	0.0395623	0.0648148	0.00505051	0.0286195	0.985	0.9743	1.0509	0.5224	5.9804	-0.0092	1.4803	0.1035	1.0041	3.0287	0.1607	0.5785	534	0.40824	0.162921	0.177903	0.250936	0.586142	0.340824	0.131086	0.0505618	0.0805243	0.0805243
NP001018494_NM000214	9698	PUM1	PUM1	NP001018494.1	1188	126679	0.0984848	0.010101	0.043771	0.0395623	0.0328283	0.0976431	0.0294613	0.0328283	0.0345118	0.0833333	0.0210438	0.0505051	0.0673401	0.0824916	0.0395623	0.0984848	0.0395623	0.0648148	0.00505051	0.0286195	0.985	0.9743	1.0509	0.5224	5.9804	-0.0092	1.4803	0.1035	1.0041	3.0287	0.1607	0.5785	3657	0.247471	0.266065	0.273448	0.213016	0.520919	0.539513	0.0563303	0.0689089	0.060432	0.0481269
NP001018494_NM175061	9698	PUM1	PUM1	NP001018494.1	1188	126679	0.0984848	0.010101	0.043771	0.0395623	0.0328283	0.0976431	0.0294613	0.0328283	0.0345118	0.0833333	0.0210438	0.0505051	0.0673401	0.0824916	0.0395623	0.0984848	0.0395623	0.0648148	0.00505051	0.0286195	0.985	0.9743	1.0509	0.5224	5.9804	-0.0092	1.4803	0.1035	1.0041	3.0287	0.1607	0.5785	732	0.270492	0.295082	0.243169	0.191257	0.513661	0.538251	0.0491803	0.0587432	0.0901639	0.0601093
NP001018494_NM002245	9698	PUM1	PUM1	NP001018494.1	1188	126679	0.0984848	0.010101	0.043771	0.0395623	0.0328283	0.0976431	0.0294613	0.0328283	0.0345118	0.0833333	0.0210438	0.0505051	0.0673401	0.0824916	0.0395623	0.0984848	0.0395623	0.0648148	0.00505051	0.0286195	0.985	0.9743	1.0509	0.5224	5.9804	-0.0092	1.4803	0.1035	1.0041	3.0287	0.1607	0.5785	1011	0.183976	0.290801	0.274975	0.250247	0.458952	0.565776	0.0306627	0.0454995	0.0563798	0.0405539
NP001018494_NM153705	9698	PUM1	PUM1	NP001018494.1	1188	126679	0.0984848	0.010101	0.043771	0.0395623	0.0328283	0.0976431	0.0294613	0.0328283	0.0345118	0.0833333	0.0210438	0.0505051	0.0673401	0.0824916	0.0395623	0.0984848	0.0395623	0.0648148	0.00505051	0.0286195	0.985	0.9743	1.0509	0.5224	5.9804	-0.0092	1.4803	0.1035	1.0041	3.0287	0.1607	0.5785	1524	0.278871	0.226378	0.246063	0.248688	0.524934	0.472441	0.062336	0.0433071	0.0833333	0.0669291
NP001018494_NM012289	9698	PUM1	PUM1	NP001018494.1	1188	126679	0.0984848	0.010101	0.043771	0.0395623	0.0328283	0.0976431	0.0294613	0.0328283	0.0345118	0.0833333	0.0210438	0.0505051	0.0673401	0.0824916	0.0395623	0.0984848	0.0395623	0.0648148	0.00505051	0.0286195	0.985	0.9743	1.0509	0.5224	5.9804	-0.0092	1.4803	0.1035	1.0041	3.0287	0.1607	0.5785	1875	0.1984	0.3024	0.314667	0.184533	0.513067	0.617067	0.0293333	0.064	0.0645333	0.0389333
NP001018494_NM014761	9698	PUM1	PUM1	NP001018494.1	1188	126679	0.0984848	0.010101	0.043771	0.0395623	0.0328283	0.0976431	0.0294613	0.0328283	0.0345118	0.0833333	0.0210438	0.0505051	0.0673401	0.0824916	0.0395623	0.0984848	0.0395623	0.0648148	0.00505051	0.0286195	0.985	0.9743	1.0509	0.5224	5.9804	-0.0092	1.4803	0.1035	1.0041	3.0287	0.1607	0.5785	1083	0.271468	0.23361	0.251154	0.243767	0.522622	0.484765	0.0581717	0.0507849	0.0729455	0.0738689
NP001018494_NM015349	9698	PUM1	PUM1	NP001018494.1	1188	126679	0.0984848	0.010101	0.043771	0.0395623	0.0328283	0.0976431	0.0294613	0.0328283	0.0345118	0.0833333	0.0210438	0.0505051	0.0673401	0.0824916	0.0395623	0.0984848	0.0395623	0.0648148	0.00505051	0.0286195	0.985	0.9743	1.0509	0.5224	5.9804	-0.0092	1.4803	0.1035	1.0041	3.0287	0.1607	0.5785	3240	0.283951	0.260802	0.220062	0.235185	0.504012	0.480864	0.0608025	0.0614198	0.0848765	0.0574074
NP001018494_NM001039479	9698	PUM1	PUM1	NP001018494.1	1188	126679	0.0984848	0.010101	0.043771	0.0395623	0.0328283	0.0976431	0.0294613	0.0328283	0.0345118	0.0833333	0.0210438	0.0505051	0.0673401	0.0824916	0.0395623	0.0984848	0.0395623	0.0648148	0.00505051	0.0286195	0.985	0.9743	1.0509	0.5224	5.9804	-0.0092	1.4803	0.1035	1.0041	3.0287	0.1607	0.5785	2472	0.254045	0.246764	0.238673	0.260518	0.492718	0.485437	0.0542071	0.0521845	0.0728155	0.0614887
NP001018494_NM014686	9698	PUM1	PUM1	NP001018494.1	1188	126679	0.0984848	0.010101	0.043771	0.0395623	0.0328283	0.0976431	0.0294613	0.0328283	0.0345118	0.0833333	0.0210438	0.0505051	0.0673401	0.0824916	0.0395623	0.0984848	0.0395623	0.0648148	0.00505051	0.0286195	0.985	0.9743	1.0509	0.5224	5.9804	-0.0092	1.4803	0.1035	1.0041	3.0287	0.1607	0.5785	3213	0.248055	0.287582	0.267663	0.196701	0.515717	0.555244	0.0473078	0.0578898	0.0849673	0.0448179
NP001018494_NM014672	9698	PUM1	PUM1	NP001018494.1	1188	126679	0.0984848	0.010101	0.043771	0.0395623	0.0328283	0.0976431	0.0294613	0.0328283	0.0345118	0.0833333	0.0210438	0.0505051	0.0673401	0.0824916	0.0395623	0.0984848	0.0395623	0.0648148	0.00505051	0.0286195	0.985	0.9743	1.0509	0.5224	5.9804	-0.0092	1.4803	0.1035	1.0041	3.0287	0.1607	0.5785	1752	0.307648	0.195776	0.223744	0.272831	0.531393	0.419521	0.0747717	0.0502283	0.0787671	0.076484
NP001018494_NM014774	9698	PUM1	PUM1	NP001018494.1	1188	126679	0.0984848	0.010101	0.043771	0.0395623	0.0328283	0.0976431	0.0294613	0.0328283	0.0345118	0.0833333	0.0210438	0.0505051	0.0673401	0.0824916	0.0395623	0.0984848	0.0395623	0.0648148	0.00505051	0.0286195	0.985	0.9743	1.0509	0.5224	5.9804	-0.0092	1.4803	0.1035	1.0041	3.0287	0.1607	0.5785	1488	0.318548	0.218414	0.236559	0.226478	0.555108	0.454973	0.0772849	0.0537634	0.102151	0.0571237
[truncated: 58 more columns]

## Sheet: human_onlypos_2oct
### Correlations only true in human protein-mRNA pairs and not in 100 randomized sets
massh	dintTTrel	-0.174515	0.174515
Arel	CDS_LENGTH	0.174091	0.174091
Arel	mlength	0.175219	0.175219
Drel	U3_LENGTH	0.257682	0.257682
Drel	U3_ntAGrel	-0.187578	0.187578
Drel	dintTTrel	0.160411	0.160411
Drel	mlength	0.223562	0.223562
Drel	lu3rel	0.216677	0.216677
Erel	CDS_LENGTH	-0.169643	0.169643
Erel	mlength	-0.172522	0.172522
Frel	U3_LENGTH	0.25013	0.25013
Frel	U3_ntAGrel	-0.203214	0.203214
Frel	mlength	0.221718	0.221718
Frel	lu3rel	0.20783	0.20783
Grel	CDS_LENGTH	0.169643	0.169643
Grel	mlength	0.172522	0.172522
Irel	U3_LENGTH	0.161073	0.161073
Irel	dintTTrel	0.174917	0.174917
Irel	lu3rel	0.160207	0.160207
Krel	CDS_LENGTH	-0.174091	0.174091
Krel	mlength	-0.175219	0.175219
Lrel	U3_LENGTH	-0.254314	0.254314
Lrel	U3_ntAGrel	0.162036	0.162036
Lrel	mlength	-0.215526	0.215526
Lrel	lu3rel	-0.216395	0.216395
Mrel	U3_LENGTH	0.25433	0.25433
Mrel	U3_ntAGrel	-0.200825	0.200825
Mrel	mlength	0.224725	0.224725
Mrel	lu3rel	0.211297	0.211297
Nrel	U3_LENGTH	0.292889	0.292889
Nrel	U3_ntAGrel	-0.195674	0.195674
Nrel	mlength	0.274516	0.274516
Nrel	lu3rel	0.225687	0.225687
Prel	U3_LENGTH	-0.194381	0.194381
Prel	U3_ntAGrel	0.164016	0.164016
Prel	dintTTrel	-0.165145	0.165145
Prel	mlength	-0.172449	0.172449
Prel	lu3rel	-0.167806	0.167806
Qrel	U3_ntAGrel	0.164078	0.164078
Qrel	dintTTrel	-0.173809	0.173809
Rrel	U3_LENGTH	0.161127	0.161127
Srel	CDS_LENGTH	0.179117	0.179117
Srel	mlength	0.178665	0.178665
Trel	CDS_LENGTH	-0.173181	0.173181
Trel	mlength	-0.172473	0.172473
Vrel	U3_ntAGrel	-0.170683	0.170683
Wrel	CDS_LENGTH	-0.176797	0.176797
Wrel	mlength	-0.181721	0.181721
Yrel	CDS_LENGTH	-0.174091	0.174091
Yrel	mlength	-0.175219	0.175219
alphahelixCHOP780201	CDS_LENGTH	-0.169643	0.169643
alphahelixCHOP780201	mlength	-0.172522	0.172522
betasheetCHOP780202	U3_ntAGrel	-0.173072	0.173072
betaturnCHOP780203	CDS_LENGTH	0.173181	0.173181
betaturnCHOP780203	mlength	0.172473	0.172473
buriedWERD780101	U3_ntAGrel	-0.173072	0.173072
flexibilityVINM940101	U3_ntAGrel	0.170683	0.170683
vdWaalsvolumeFAUJ880103	CDS_LENGTH	-0.169643	0.169643
vdWaalsvolumeFAUJ880103	mlength	-0.172522	0.172522
partitionenergiesGUYH850105	CDS_LENGTH	-0.176797	0.176797
partitionenergiesGUYH850105	mlength	-0.181721	0.181721

## Sheet: pose set pvalues
### p-values of correlations found in positive set
length	Arel	3.22978e-83	3.22978e-83
length	Crel	2.03868e-114	2.03868e-114
length	Drel	4.75097e-244	4.75097e-244
length	Erel	3.59413e-79	3.59413e-79
length	Frel	5.65376e-231	5.65376e-231
length	Grel	3.59413e-79	3.59413e-79
length	Hrel	6.11479e-114	6.11479e-114
length	Krel	3.22978e-83	3.22978e-83
length	Lrel	1.46364e-208	1.46364e-208
length	Mrel	7.82041e-230	7.82041e-230
length	Nrel	5.1566e-195	5.1566e-195
length	Rrel	2.05413e-124	2.05413e-124
length	Srel	3.69667e-70	3.69667e-70
length	Trel	6.52875e-77	6.52875e-77
length	Vrel	1.69344e-118	1.69344e-118
length	Wrel	1.44155e-72	1.44155e-72
length	Yrel	3.22978e-83	3.22978e-83
length	alphahelixCHOP780201	3.59413e-79	3.59413e-79
length	betasheetCHOP780202	5.39925e-119	5.39925e-119
length	betaturnCHOP780203	6.52875e-77	6.52875e-77
length	buriedWERD780101	5.39925e-119	5.39925e-119
length	isoelectricpointZIMJ680104	2.05413e-124	2.05413e-124
length	netchargeKLEP840101	2.05413e-124	2.05413e-124
length	hydrophobicmomentEISD860102	3.59413e-79	3.59413e-79
length	positivechargeFAUJ880111	6.52875e-77	6.52875e-77
length	flexibilityVINM940101	1.69344e-118	1.69344e-118
length	vdWaalsvolumeFAUJ880103	3.59413e-79	3.59413e-79
length	partitionenergiesGUYH850105	1.44155e-72	1.44155e-72
length	solventwaterNOZY710101	1.61676e-203	1.61676e-203
length	CDS_LENGTH	0.392091	0.392091
length	CDS_ntArel	0.875912	0.875912
length	CDS_ntCrel	0.390962	0.390962
length	CDS_ntGrel	0.730288	0.730288
length	CDS_ntTrel	0.36528	0.36528
length	CDS_ntAGrel	0.649771	0.649771
length	CDS_ntCGrel	0.545441	0.545441
length	CDS_dintAArel	0.98202	0.98202
length	CDS_dinetACrel	0.603559	0.603559
length	CDS_dintAGrel	0.987707	0.987707
length	CDS_dintATrel	0.321016	0.321016
length	CDS_dintCArel	0.61969	0.61969
length	CDS_dintCCrel	0.346681	0.346681
length	CDS_dintCGrel	0.168841	0.168841
length	CDS_dintCTrel	0.354097	0.354097
length	CDS_dintGArel	0.974014	0.974014
length	CDS_dintGCrel	0.384576	0.384576
length	CDS_dintGGrel	0.998273	0.998273
length	CDS_dintGTrel	0.0718606	0.0718606
length	CDS_dintTArel	0.549717	0.549717
length	CDS_dintTCrel	0.863126	0.863126
length	CDS_dintTGrel	0.258164	0.258164
length	CDS_dintTTrel	0.546484	0.546484
length	U5_LENGTH	0.0295959	0.0295959
length	U5_ntArel	0.992235	0.992235
length	U5_ntCrel	0.998491	0.998491
length	U5_ntGrel	0.974762	0.974762
length	U5_ntTrel	0.48407	0.48407
length	U5_ntAGrel	0.783774	0.783774
length	U5_ntCGrel	0.858261	0.858261
length	U5_dintAArel	0.350844	0.350844
length	U5_dinetACrel	0.622462	0.622462
length	U5_dintAGrel	0.415158	0.415158
length	U5_dintATrel	0.550227	0.550227
length	U5_dintCArel	0.869144	0.869144
length	U5_dintCCrel	0.772189	0.772189
length	U5_dintCGrel	0.763393	0.763393
length	U5_dintCTrel	0.394843	0.394843
length	U5_dintGArel	0.430782	0.430782
length	U5_dintGCrel	0.649858	0.649858
length	U5_dintGGrel	0.984846	0.984846
length	U5_dintGTrel	0.219202	0.219202
length	U5_dintTArel	0.95603	0.95603
length	U5_dintTCrel	0.691194	0.691194
length	U5_dintTGrel	0.397732	0.397732
length	U5_dintTTrel	0.701612	0.701612
length	U3_LENGTH	8.72717e-06	8.72717e-06
length	U3_ntArel	0.250212	0.250212
length	U3_ntCrel	0.223466	0.223466
length	U3_ntGrel	0.0160236	0.0160236
length	U3_ntTrel	0.000186586	0.000186586
length	U3_ntAGrel	1.47714e-05	1.47714e-05
length	U3_ntCGrel	0.102672	0.102672
length	U3_dintAArel	0.620165	0.620165
length	U3_dinetACrel	0.0273591	0.0273591
length	U3_dintAGrel	0.103125	0.103125
length	U3_dintATrel	0.574926	0.574926
length	U3_dintCArel	0.2037	0.2037
length	U3_dintCCrel	0.410102	0.410102
length	U3_dintCGrel	0.273777	0.273777
length	U3_dintCTrel	0.455953	0.455953
length	U3_dintGArel	0.0177957	0.0177957
length	U3_dintGCrel	0.203426	0.203426
length	U3_dintGGrel	0.0521847	0.0521847
length	U3_dintGTrel	0.781716	0.781716
length	U3_dintTArel	0.72958	0.72958
length	U3_dintTCrel	0.947482	0.947482
length	U3_dintTGrel	0.027443	0.027443
length	dintTTrel	4.94597e-07	4.94597e-07
length	mlength	0.000585006	0.000585006
length	lu3rel	1.00949e-05	1.00949e-05
length	lu5rel	0.76775	0.76775
massh	Arel	1.9946e-79	1.9946e-79
massh	Crel	6.11479e-114	6.11479e-114
massh	Drel	1.27037e-253	1.27037e-253
massh	Erel	9.3682e-74	9.3682e-74
massh	Frel	7.82041e-230	7.82041e-230
massh	Grel	9.3682e-74	9.3682e-74
massh	Hrel	2.03868e-114	2.03868e-114
massh	Krel	1.9946e-79	1.9946e-79
massh	Lrel	1.18194e-225	1.18194e-225
massh	Mrel	5.65376e-231	5.65376e-231
massh	Nrel	4.01735e-194	4.01735e-194
massh	Rrel	7.42312e-128	7.42312e-128
massh	Srel	9.48002e-71	9.48002e-71
massh	Trel	6.51775e-72	6.51775e-72
massh	Vrel	5.39925e-119	5.39925e-119
massh	Wrel	2.98167e-72	2.98167e-72
massh	Yrel	1.9946e-79	1.9946e-79
massh	alphahelixCHOP780201	9.3682e-74	9.3682e-74
massh	betasheetCHOP780202	1.69344e-118	1.69344e-118
massh	betaturnCHOP780203	6.51775e-72	6.51775e-72
massh	buriedWERD780101	1.69344e-118	1.69344e-118
massh	isoelectricpointZIMJ680104	7.42312e-128	7.42312e-128
massh	netchargeKLEP840101	7.42312e-128	7.42312e-128
massh	hydrophobicmomentEISD860102	9.3682e-74	9.3682e-74
massh	positivechargeFAUJ880111	6.51775e-72	6.51775e-72
massh	flexibilityVINM940101	5.39925e-119	5.39925e-119
massh	vdWaalsvolumeFAUJ880103	9.3682e-74	9.3682e-74
massh	partitionenergiesGUYH850105	2.98167e-72	2.98167e-72
massh	solventwaterNOZY710101	1.81942e-197	1.81942e-197
massh	CDS_LENGTH	0.411625	0.411625
massh	CDS_ntArel	0.859006	0.859006
massh	CDS_ntCrel	0.379303	0.379303
massh	CDS_ntGrel	0.748867	0.748867
massh	CDS_ntTrel	0.347671	0.347671
massh	CDS_ntAGrel	0.662462	0.662462
massh	CDS_ntCGrel	0.552824	0.552824
massh	CDS_dintAArel	0.959367	0.959367
massh	CDS_dinetACrel	0.588604	0.588604
massh	CDS_dintAGrel	0.9766	0.9766
massh	CDS_dintATrel	0.322302	0.322302
massh	CDS_dintCArel	0.638936	0.638936
massh	CDS_dintCCrel	0.328755	0.328755
massh	CDS_dintCGrel	0.172738	0.172738
massh	CDS_dintCTrel	0.361927	0.361927
massh	CDS_dintGArel	0.989043	0.989043
massh	CDS_dintGCrel	0.377809	0.377809
massh	CDS_dintGGrel	0.992181	0.992181
massh	CDS_dintGTrel	0.0646906	0.0646906
massh	CDS_dintTArel	0.52548	0.52548
massh	CDS_dintTCrel	0.839589	0.839589
massh	CDS_dintTGrel	0.244048	0.244048
massh	CDS_dintTTrel	0.531139	0.531139
massh	U5_LENGTH	0.0293364	0.0293364
massh	U5_ntArel	0.991769	0.991769
massh	U5_ntCrel	0.942155	0.942155
massh	U5_ntGrel	0.928695	0.928695
massh	U5_ntTrel	0.489135	0.489135
massh	U5_ntAGrel	0.724427	0.724427
massh	U5_ntCGrel	0.865502	0.865502
massh	U5_dintAArel	0.334002	0.334002
massh	U5_dinetACrel	0.67635	0.67635
massh	U5_dintAGrel	0.40157	0.40157
massh	U5_dintATrel	0.534669	0.534669
massh	U5_dintCArel	0.86171	0.86171
massh	U5_dintCCrel	0.731827	0.731827
massh	U5_dintCGrel	0.775848	0.775848
massh	U5_dintCTrel	0.375951	0.375951
massh	U5_dintGArel	0.455692	0.455692
massh	U5_dintGCrel	0.66979	0.66979
massh	U5_dintGGrel	0.918536	0.918536
massh	U5_dintGTrel	0.237624	0.237624
massh	U5_dintTArel	0.962129	0.962129
massh	U5_dintTCrel	0.625884	0.625884
massh	U5_dintTGrel	0.433649	0.433649
massh	U5_dintTTrel	0.701447	0.701447
massh	U3_LENGTH	4.90649e-06	4.90649e-06
massh	U3_ntArel	0.282381	0.282381
massh	U3_ntCrel	0.212334	0.212334
massh	U3_ntGrel	0.0147676	0.0147676
massh	U3_ntTrel	0.000195305	0.000195305
massh	U3_ntAGrel	2.01987e-05	2.01987e-05
massh	U3_ntCGrel	0.0970989	0.0970989
massh	U3_dintAArel	0.672429	0.672429
massh	U3_dinetACrel	0.0289719	0.0289719
massh	U3_dintAGrel	0.113972	0.113972
massh	U3_dintATrel	0.555817	0.555817
massh	U3_dintCArel	0.211112	0.211112
massh	U3_dintCCrel	0.407573	0.407573
massh	U3_dintCGrel	0.269743	0.269743
massh	U3_dintCTrel	0.397275	0.397275
massh	U3_dintGArel	0.0185842	0.0185842
massh	U3_dintGCrel	0.18907	0.18907
massh	U3_dintGGrel	0.0461473	0.0461473
massh	U3_dintGTrel	0.836989	0.836989
massh	U3_dintTArel	0.691578	0.691578
massh	U3_dintTCrel	0.984341	0.984341
massh	U3_dintTGrel	0.0261333	0.0261333
massh	dintTTrel	5.10811e-07	5.10811e-07
massh	mlength	0.000422995	0.000422995
massh	lu3rel	6.3026e-06	6.3026e-06
massh	lu5rel	0.744299	0.744299
Arel	Crel	1.24161e-115	1.24161e-115
Arel	Drel	3.50199e-10	3.50199e-10
Arel	Frel	8.5916e-11	8.5916e-11
Arel	Hrel	1.73315e-110	1.73315e-110
Arel	Irel	1.82105e-77	1.82105e-77
Arel	Lrel	2.63113e-08	2.63113e-08
Arel	Mrel	7.59514e-10	7.59514e-10
Arel	Nrel	0.124467	0.124467
Arel	Prel	3.08531e-38	3.08531e-38
Arel	Qrel	7.8948e-82	7.8948e-82
Arel	Rrel	1.00629e-22	1.00629e-22
Arel	Vrel	1.65363e-21	1.65363e-21
Arel	betasheetCHOP780202	5.14599e-23	5.14599e-23
Arel	buriedWERD780101	5.14599e-23	5.14599e-23
Arel	isoelectricpointZIMJ680104	1.00629e-22	1.00629e-22
Arel	netchargeKLEP840101	1.00629e-22	1.00629e-22
Arel	flexibilityVINM940101	1.65363e-21	1.65363e-21
Arel	solventwaterNOZY710101	3.85017e-125	3.85017e-125
Arel	CDS_LENGTH	5.448e-07	5.448e-07
Arel	CDS_ntArel	0.0272637	0.0272637
Arel	CDS_ntCrel	0.000626474	0.000626474
Arel	CDS_ntGrel	0.0416454	0.0416454
Arel	CDS_ntTrel	0.654823	0.654823
Arel	CDS_ntAGrel	3.9493e-05	3.9493e-05
Arel	CDS_ntCGrel	0.237929	0.237929
Arel	CDS_dintAArel	0.00120297	0.00120297
Arel	CDS_dinetACrel	0.0720059	0.0720059
Arel	CDS_dintAGrel	0.146526	0.146526
Arel	CDS_dintATrel	0.891621	0.891621
Arel	CDS_dintCArel	0.0458634	0.0458634
Arel	CDS_dintCCrel	0.00120935	0.00120935
Arel	CDS_dintCGrel	0.245366	0.245366
Arel	CDS_dintCTrel	0.00587417	0.00587417
Arel	CDS_dintGArel	0.0111019	0.0111019
Arel	CDS_dintGCrel	0.250752	0.250752
Arel	CDS_dintGGrel	0.0645826	0.0645826
Arel	CDS_dintGTrel	0.0524656	0.0524656
Arel	CDS_dintTArel	0.516535	0.516535
Arel	CDS_dintTCrel	0.00203175	0.00203175
Arel	CDS_dintTGrel	0.0130949	0.0130949
Arel	CDS_dintTTrel	0.991609	0.991609
Arel	U5_LENGTH	0.226946	0.226946
Arel	U5_ntArel	0.401417	0.401417
Arel	U5_ntCrel	0.720302	0.720302
Arel	U5_ntGrel	0.0073434	0.0073434
Arel	U5_ntTrel	6.00607e-05	6.00607e-05
Arel	U5_ntAGrel	0.000732258	0.000732258
Arel	U5_ntCGrel	0.0169954	0.0169954
Arel	U5_dintAArel	0.208578	0.208578
Arel	U5_dinetACrel	0.22498	0.22498
Arel	U5_dintAGrel	0.166188	0.166188
Arel	U5_dintATrel	0.723392	0.723392
Arel	U5_dintCArel	0.866143	0.866143
Arel	U5_dintCCrel	0.874556	0.874556
Arel	U5_dintCGrel	0.38329	0.38329
Arel	U5_dintCTrel	0.00108038	0.00108038
Arel	U5_dintGArel	0.059302	0.059302
Arel	U5_dintGCrel	0.141839	0.141839
Arel	U5_dintGGrel	0.0120639	0.0120639
Arel	U5_dintGTrel	0.0168186	0.0168186
Arel	U5_dintTArel	0.314647	0.314647
Arel	U5_dintTCrel	0.00667792	0.00667792
Arel	U5_dintTGrel	0.533399	0.533399
Arel	U5_dintTTrel	0.000324641	0.000324641
Arel	U3_LENGTH	2.32691e-05	2.32691e-05
Arel	U3_ntArel	0.171377	0.171377
Arel	U3_ntCrel	0.104049	0.104049
Arel	U3_ntGrel	0.0127741	0.0127741
Arel	U3_ntTrel	0.0867057	0.0867057
Arel	U3_ntAGrel	0.800782	0.800782
Arel	U3_ntCGrel	0.0481551	0.0481551
Arel	U3_dintAArel	0.0812366	0.0812366
Arel	U3_dinetACrel	0.549326	0.549326
Arel	U3_dintAGrel	0.0291798	0.0291798
Arel	U3_dintATrel	0.303556	0.303556
Arel	U3_dintCArel	0.907615	0.907615
Arel	U3_dintCCrel	0.106645	0.106645
Arel	U3_dintCGrel	0.0726966	0.0726966
Arel	U3_dintCTrel	0.189633	0.189633
Arel	U3_dintGArel	0.198435	0.198435
Arel	U3_dintGCrel	0.13375	0.13375
Arel	U3_dintGGrel	0.114996	0.114996
Arel	U3_dintGTrel	0.431817	0.431817
Arel	U3_dintTArel	0.964043	0.964043
Arel	U3_dintTCrel	0.724126	0.724126
Arel	U3_dintTGrel	0.111837	0.111837
Arel	dintTTrel	0.00623582	0.00623582
Arel	mlength	4.58799e-07	4.58799e-07
Arel	lu3rel	0.102199	0.102199
Arel	lu5rel	0.00317101	0.00317101
Crel	Drel	1.25382e-14	1.25382e-14
Crel	Erel	2.93975e-99	2.93975e-99
Crel	Frel	1.98072e-10	1.98072e-10
Crel	Grel	2.93975e-99	2.93975e-99
Crel	Irel	2.99753e-85	2.99753e-85
Crel	Krel	1.24161e-115	1.24161e-115
Crel	Lrel	3.14927e-17	3.14927e-17
Crel	Mrel	2.42142e-10	2.42142e-10
Crel	Nrel	3.24438e-24	3.24438e-24
Crel	Prel	1.2026e-113	1.2026e-113
Crel	Qrel	4.41353e-95	4.41353e-95
Crel	Rrel	0.540069	0.540069
Crel	Srel	3.95764e-98	3.95764e-98
Crel	Trel	5.44512e-74	5.44512e-74
Crel	Vrel	0.6348	0.6348
Crel	Wrel	1.50156e-131	1.50156e-131
Crel	Yrel	1.24161e-115	1.24161e-115
Crel	alphahelixCHOP780201	2.93975e-99	2.93975e-99
Crel	betasheetCHOP780202	0.656186	0.656186
Crel	betaturnCHOP780203	5.44512e-74	5.44512e-74
Crel	buriedWERD780101	0.656186	0.656186
Crel	isoelectricpointZIMJ680104	0.540069	0.540069
Crel	netchargeKLEP840101	0.540069	0.540069
Crel	hydrophobicmomentEISD860102	2.93975e-99	2.93975e-99
Crel	positivechargeFAUJ880111	5.44512e-74	5.44512e-74
Crel	flexibilityVINM940101	0.6348	0.6348
Crel	vdWaalsvolumeFAUJ880103	2.93975e-99	2.93975e-99
Crel	partitionenergiesGUYH850105	1.50156e-131	1.50156e-131
Crel	solventwaterNOZY710101	2.0645e-22	2.0645e-22
Crel	CDS_LENGTH	0.0440776	0.0440776
Crel	CDS_ntArel	0.367941	0.367941
Crel	CDS_ntCrel	0.0420913	0.0420913
Crel	CDS_ntGrel	0.495582	0.495582
Crel	CDS_ntTrel	0.697989	0.697989
Crel	CDS_ntAGrel	0.0634501	0.0634501
Crel	CDS_ntCGrel	0.416142	0.416142
Crel	CDS_dintAArel	0.168269	0.168269
Crel	CDS_dinetACrel	0.50757	0.50757
Crel	CDS_dintAGrel	0.793822	0.793822
Crel	CDS_dintATrel	0.608218	0.608218
Crel	CDS_dintCArel	0.395806	0.395806
Crel	CDS_dintCCrel	0.0355827	0.0355827
Crel	CDS_dintCGrel	0.301045	0.301045
Crel	CDS_dintCTrel	0.0950729	0.0950729
Crel	CDS_dintGArel	0.629727	0.629727
Crel	CDS_dintGCrel	0.469845	0.469845
Crel	CDS_dintGGrel	0.4474	0.4474
Crel	CDS_dintGTrel	0.183816	0.183816
Crel	CDS_dintTArel	0.567664	0.567664
Crel	CDS_dintTCrel	0.043431	0.043431
Crel	CDS_dintTGrel	0.186008	0.186008
Crel	CDS_dintTTrel	0.519951	0.519951
Crel	U5_LENGTH	0.838195	0.838195
Crel	U5_ntArel	0.276288	0.276288
Crel	U5_ntCrel	0.795508	0.795508
Crel	U5_ntGrel	0.457632	0.457632
Crel	U5_ntTrel	0.0318301	0.0318301
Crel	U5_ntAGrel	0.0556157	0.0556157
Crel	U5_ntCGrel	0.401998	0.401998
Crel	U5_dintAArel	0.0785569	0.0785569
Crel	U5_dinetACrel	0.855274	0.855274
Crel	U5_dintAGrel	0.498884	0.498884
Crel	U5_dintATrel	0.847227	0.847227
Crel	U5_dintCArel	0.615114	0.615114
Crel	U5_dintCCrel	0.708471	0.708471
Crel	U5_dintCGrel	0.488232	0.488232
Crel	U5_dintCTrel	0.0487745	0.0487745
Crel	U5_dintGArel	0.582938	0.582938
Crel	U5_dintGCrel	0.507499	0.507499
Crel	U5_dintGGrel	0.498888	0.498888
Crel	U5_dintGTrel	0.05101	0.05101
Crel	U5_dintTArel	0.717421	0.717421
Crel	U5_dintTCrel	0.163805	0.163805
Crel	U5_dintTGrel	0.146995	0.146995
Crel	U5_dintTTrel	0.0697991	0.0697991
Crel	U3_LENGTH	0.749123	0.749123
Crel	U3_ntArel	0.143328	0.143328
Crel	U3_ntCrel	0.217298	0.217298
Crel	U3_ntGrel	0.00805705	0.00805705
Crel	U3_ntTrel	0.0661411	0.0661411
Crel	U3_ntAGrel	0.742894	0.742894
Crel	U3_ntCGrel	0.0490691	0.0490691
Crel	U3_dintAArel	0.0497644	0.0497644
Crel	U3_dinetACrel	0.555883	0.555883
Crel	U3_dintAGrel	0.713332	0.713332
Crel	U3_dintATrel	0.732295	0.732295
Crel	U3_dintCArel	0.895505	0.895505
Crel	U3_dintCCrel	0.295685	0.295685
Crel	U3_dintCGrel	0.731407	0.731407
Crel	U3_dintCTrel	0.0611079	0.0611079
Crel	U3_dintGArel	0.0421755	0.0421755
Crel	U3_dintGCrel	0.43812	0.43812
Crel	U3_dintGGrel	0.0310182	0.0310182
Crel	U3_dintGTrel	0.296012	0.296012
Crel	U3_dintTArel	0.689146	0.689146
Crel	U3_dintTCrel	0.174623	0.174623
Crel	U3_dintTGrel	0.000414309	0.000414309
Crel	dintTTrel	0.00269241	0.00269241
Crel	mlength	0.373695	0.373695
Crel	lu3rel	0.489044	0.489044
Crel	lu5rel	0.226721	0.226721
Drel	Erel	3.30312e-09	3.30312e-09
Drel	Grel	3.30312e-09	3.30312e-09
Drel	Hrel	1.94968e-15	1.94968e-15
Drel	Irel	6.86379e-299	6.86379e-299
Drel	Krel	3.50199e-10	3.50199e-10
Drel	Nrel	6.17821e-305	6.17821e-305
Drel	Prel	5.04582e-188	5.04582e-188
Drel	Qrel	7.82041e-230	7.82041e-230
Drel	Rrel	7.12099e-271	7.12099e-271
Drel	Srel	1.91442e-11	1.91442e-11
Drel	Trel	8.59269e-12	8.59269e-12
Drel	Vrel	1.88819e-254	1.88819e-254
Drel	Wrel	2.50088e-08	2.50088e-08
Drel	Yrel	3.50199e-10	3.50199e-10
Drel	alphahelixCHOP780201	3.30312e-09	3.30312e-09
Drel	betasheetCHOP780202	7.93388e-245	7.93388e-245
Drel	betaturnCHOP780203	8.59269e-12	8.59269e-12
Drel	buriedWERD780101	7.93388e-245	7.93388e-245
Drel	isoelectricpointZIMJ680104	7.12099e-271	7.12099e-271
Drel	netchargeKLEP840101	7.12099e-271	7.12099e-271
Drel	hydrophobicmomentEISD860102	3.30312e-09	3.30312e-09
Drel	positivechargeFAUJ880111	8.59269e-12	8.59269e-12
Drel	flexibilityVINM940101	1.88819e-254	1.88819e-254
Drel	vdWaalsvolumeFAUJ880103	3.30312e-09	3.30312e-09
Drel	partitionenergiesGUYH850105	2.50088e-08	2.50088e-08
Drel	solventwaterNOZY710101	4.64473e-158	4.64473e-158
Drel	CDS_LENGTH	0.295525	0.295525
Drel	CDS_ntArel	0.228353	0.228353
Drel	CDS_ntCrel	0.584712	0.584712
Drel	CDS_ntGrel	0.239937	0.239937
Drel	CDS_ntTrel	0.223581	0.223581
Drel	CDS_ntAGrel	0.206458	0.206458
Drel	CDS_ntCGrel	0.909305	0.909305
Drel	CDS_dintAArel	0.131494	0.131494
Drel	CDS_dinetACrel	0.13766	0.13766
Drel	CDS_dintAGrel	0.699804	0.699804
Drel	CDS_dintATrel	0.299837	0.299837
Drel	CDS_dintCArel	0.148011	0.148011
Drel	CDS_dintCCrel	0.698073	0.698073
Drel	CDS_dintCGrel	0.299683	0.299683
Drel	CDS_dintCTrel	0.813508	0.813508
Drel	CDS_dintGArel	0.434003	0.434003
Drel	CDS_dintGCrel	0.554907	0.554907
Drel	CDS_dintGGrel	0.45283	0.45283
Drel	CDS_dintGTrel	0.143098	0.143098
Drel	CDS_dintTArel	0.443794	0.443794
Drel	CDS_dintTCrel	0.173227	0.173227
Drel	CDS_dintTGrel	0.67835	0.67835
Drel	CDS_dintTTrel	0.577309	0.577309
Drel	U5_LENGTH	0.00197596	0.00197596
Drel	U5_ntArel	0.495277	0.495277
Drel	U5_ntCrel	0.992885	0.992885
Drel	U5_ntGrel	0.457831	0.457831
Drel	U5_ntTrel	0.303169	0.303169
Drel	U5_ntAGrel	0.274234	0.274234
Drel	U5_ntCGrel	0.467347	0.467347
Drel	U5_dintAArel	0.845856	0.845856
Drel	U5_dinetACrel	0.789806	0.789806
Drel	U5_dintAGrel	0.0710311	0.0710311
Drel	U5_dintATrel	0.37358	0.37358
Drel	U5_dintCArel	0.968341	0.968341
Drel	U5_dintCCrel	0.746478	0.746478
Drel	U5_dintCGrel	0.85611	0.85611
Drel	U5_dintCTrel	0.650236	0.650236
Drel	U5_dintGArel	0.105206	0.105206
Drel	U5_dintGCrel	0.901209	0.901209
Drel	U5_dintGGrel	0.539112	0.539112
Drel	U5_dintGTrel	0.99165	0.99165
Drel	U5_dintTArel	0.727093	0.727093
Drel	U5_dintTCrel	0.625346	0.625346
Drel	U5_dintTGrel	0.929954	0.929954
Drel	U5_dintTTrel	0.24051	0.24051
Drel	U3_LENGTH	7.13463e-14	7.13463e-14
Drel	U3_ntArel	0.0184882	0.0184882
Drel	U3_ntCrel	0.454361	0.454361
Drel	U3_ntGrel	0.148072	0.148072
Drel	U3_ntTrel	0.000233703	0.000233703
Drel	U3_ntAGrel	6.49187e-08	6.49187e-08
Drel	U3_ntCGrel	0.394118	0.394118
Drel	U3_dintAArel	0.0698088	0.0698088
Drel	U3_dinetACrel	0.0135883	0.0135883
Drel	U3_dintAGrel	0.167182	0.167182
Drel	U3_dintATrel	0.66011	0.66011
Drel	U3_dintCArel	0.0919229	0.0919229
Drel	U3_dintCCrel	0.808248	0.808248
Drel	U3_dintCGrel	0.201953	0.201953
Drel	U3_dintCTrel	0.940677	0.940677
Drel	U3_dintGArel	0.0670401	0.0670401
Drel	U3_dintGCrel	0.265938	0.265938
Drel	U3_dintGGrel	0.18225	0.18225
Drel	U3_dintGTrel	0.59405	0.59405
Drel	U3_dintTArel	0.671953	0.671953
Drel	U3_dintTCrel	0.553272	0.553272
Drel	U3_dintTGrel	0.367225	0.367225
Drel	dintTTrel	4.01261e-06	4.01261e-06
Drel	mlength	1.00459e-10	1.00459e-10
Drel	lu3rel	3.7967e-10	3.7967e-10
Drel	lu5rel	0.0827063	0.0827063
Erel	Frel	4.06264e-12	4.06264e-12
Erel	Hrel	1.21158e-92	1.21158e-92
Erel	Irel	6.51775e-72	6.51775e-72
Erel	Lrel	1.26704e-05	1.26704e-05
Erel	Mrel	1.31197e-10	1.31197e-10
Erel	Nrel	0.0494694	0.0494694
Erel	Prel	1.4297e-40	1.4297e-40
Erel	Qrel	5.74262e-85	5.74262e-85
Erel	Rrel	1.65363e-21	1.65363e-21
Erel	Srel	5.05266e-308	5.05266e-308
Erel	Vrel	1.00629e-22	1.00629e-22
Erel	betasheetCHOP780202	4.26979e-25	4.26979e-25
Erel	buriedWERD780101	4.26979e-25	4.26979e-25
Erel	isoelectricpointZIMJ680104	1.65363e-21	1.65363e-21
Erel	netchargeKLEP840101	1.65363e-21	1.65363e-21
Erel	flexibilityVINM940101	1.00629e-22	1.00629e-22
Erel	solventwaterNOZY710101	7.36431e-130	7.36431e-130
Erel	CDS_LENGTH	1.06138e-06	1.06138e-06
Erel	CDS_ntArel	0.0314976	0.0314976
Erel	CDS_ntCrel	0.00147004	0.00147004
Erel	CDS_ntGrel	0.0640428	0.0640428
Erel	CDS_ntTrel	0.606202	0.606202
Erel	CDS_ntAGrel	7.66228e-05	7.66228e-05
Erel	CDS_ntCGrel	0.246617	0.246617
Erel	CDS_dintAArel	0.00163347	0.00163347
Erel	CDS_dinetACrel	0.079383	0.079383
Erel	CDS_dintAGrel	0.177506	0.177506
Erel	CDS_dintATrel	0.878965	0.878965
Erel	CDS_dintCArel	0.0728367	0.0728367
Erel	CDS_dintCCrel	0.00305854	0.00305854
Erel	CDS_dintCGrel	0.245188	0.245188
Erel	CDS_dintCTrel	0.00770711	0.00770711
Erel	CDS_dintGArel	0.0177222	0.0177222
Erel	CDS_dintGCrel	0.284148	0.284148
Erel	CDS_dintGGrel	0.0861971	0.0861971
Erel	CDS_dintGTrel	0.0823272	0.0823272
Erel	CDS_dintTArel	0.461579	0.461579
Erel	CDS_dintTCrel	0.00495397	0.00495397
Erel	CDS_dintTGrel	0.0228563	0.0228563
Erel	CDS_dintTTrel	0.933194	0.933194
Erel	U5_LENGTH	0.267081	0.267081
Erel	U5_ntArel	0.479989	0.479989
Erel	U5_ntCrel	0.908548	0.908548
Erel	U5_ntGrel	0.0171487	0.0171487
Erel	U5_ntTrel	0.000128699	0.000128699
Erel	U5_ntAGrel	0.00312698	0.00312698
Erel	U5_ntCGrel	0.0214113	0.0214113
Erel	U5_dintAArel	0.281821	0.281821
Erel	U5_dinetACrel	0.157064	0.157064
Erel	U5_dintAGrel	0.176588	0.176588
Erel	U5_dintATrel	0.764558	0.764558
Erel	U5_dintCArel	0.904258	0.904258
Erel	U5_dintCCrel	0.992065	0.992065
Erel	U5_dintCGrel	0.383552	0.383552
Erel	U5_dintCTrel	0.00271828	0.00271828
Erel	U5_dintGArel	0.0998732	0.0998732
Erel	U5_dintGCrel	0.13714	0.13714
Erel	U5_dintGGrel	0.0318723	0.0318723
Erel	U5_dintGTrel	0.0159547	0.0159547
Erel	U5_dintTArel	0.327358	0.327358
Erel	U5_dintTCrel	0.0212052	0.0212052
Erel	U5_dintTGrel	0.449083	0.449083
Erel	U5_dintTTrel	0.000663147	0.000663147
Erel	U3_LENGTH	1.9277e-05	1.9277e-05
Erel	U3_ntArel	0.316908	0.316908
Erel	U3_ntCrel	0.141295	0.141295
Erel	U3_ntGrel	0.0220885	0.0220885
Erel	U3_ntTrel	0.0822584	0.0822584
Erel	U3_ntAGrel	0.564092	0.564092
Erel	U3_ntCGrel	0.071559	0.071559
Erel	U3_dintAArel	0.170388	0.170388
Erel	U3_dinetACrel	0.487529	0.487529
Erel	U3_dintAGrel	0.022102	0.022102
Erel	U3_dintATrel	0.360945	0.360945
Erel	U3_dintCArel	0.825522	0.825522
Erel	U3_dintCCrel	0.126397	0.126397
Erel	U3_dintCGrel	0.079608	0.079608
Erel	U3_dintCTrel	0.359078	0.359078
Erel	U3_dintGArel	0.198262	0.198262
Erel	U3_dintGCrel	0.181893	0.181893
Erel	U3_dintGGrel	0.178675	0.178675
Erel	U3_dintGTrel	0.348881	0.348881
Erel	U3_dintTArel	0.842769	0.842769
Erel	U3_dintTCrel	0.974535	0.974535
Erel	U3_dintTGrel	0.15804	0.15804
Erel	dintTTrel	0.00684609	0.00684609
Erel	mlength	6.90633e-07	6.90633e-07
Erel	lu3rel	0.080483	0.080483
Erel	lu5rel	0.00400786	0.00400786
Frel	Grel	4.06264e-12	4.06264e-12
Frel	Hrel	2.42142e-10	2.42142e-10
Frel	Irel	9.40086e-268	9.40086e-268
Frel	Krel	8.5916e-11	8.5916e-11
Frel	Lrel	2.36084328208781e-319	2.36084328208781e-319
Frel	Prel	1.53131e-205	1.53131e-205
Frel	Qrel	1.27037e-253	1.27037e-253
Frel	Rrel	4.66464e-256	4.66464e-256
Frel	Srel	1.4118e-07	1.4118e-07
Frel	Trel	3.85757e-15	3.85757e-15
Frel	Vrel	9.15722e-277	9.15722e-277
Frel	Wrel	1.10242e-05	1.10242e-05
Frel	Yrel	8.5916e-11	8.5916e-11
Frel	alphahelixCHOP780201	4.06264e-12	4.06264e-12
Frel	betasheetCHOP780202	2.56297e-278	2.56297e-278
Frel	betaturnCHOP780203	3.85757e-15	3.85757e-15
Frel	buriedWERD780101	2.56297e-278	2.56297e-278
Frel	isoelectricpointZIMJ680104	4.66464e-256	4.66464e-256
Frel	netchargeKLEP840101	4.66464e-256	4.66464e-256
Frel	hydrophobicmomentEISD860102	4.06264e-12	4.06264e-12
Frel	positivechargeFAUJ880111	3.85757e-15	3.85757e-15
Frel	flexibilityVINM940101	9.15722e-277	9.15722e-277
Frel	vdWaalsvolumeFAUJ880103	4.06264e-12	4.06264e-12
Frel	partitionenergiesGUYH850105	1.10242e-05	1.10242e-05
Frel	solventwaterNOZY710101	1.69057e-175	1.69057e-175
Frel	CDS_LENGTH	0.267614	0.267614
Frel	CDS_ntArel	0.219406	0.219406
Frel	CDS_ntCrel	0.415545	0.415545
Frel	CDS_ntGrel	0.164446	0.164446
Frel	CDS_ntTrel	0.273551	0.273551
Frel	CDS_ntAGrel	0.166004	0.166004
Frel	CDS_ntCGrel	0.914245	0.914245
Frel	CDS_dintAArel	0.120869	0.120869
Frel	CDS_dinetACrel	0.134205	0.134205
Frel	CDS_dintAGrel	0.617791	0.617791
Frel	CDS_dintATrel	0.291658	0.291658
Frel	CDS_dintCArel	0.0914291	0.0914291
Frel	CDS_dintCCrel	0.475366	0.475366
Frel	CDS_dintCGrel	0.29116	0.29116
Frel	CDS_dintCTrel	0.761319	0.761319
Frel	CDS_dintGArel	0.336776	0.336776
Frel	CDS_dintGCrel	0.618083	0.618083
Frel	CDS_dintGGrel	0.370095	0.370095
Frel	CDS_dintGTrel	0.229622	0.229622
Frel	CDS_dintTArel	0.540172	0.540172
Frel	CDS_dintTCrel	0.0916612	0.0916612
Frel	CDS_dintTGrel	0.866168	0.866168
Frel	CDS_dintTTrel	0.658221	0.658221
Frel	U5_LENGTH	0.00143776	0.00143776
Frel	U5_ntArel	0.391688	0.391688
Frel	U5_ntCrel	0.733255	0.733255
Frel	U5_ntGrel	0.268049	0.268049
Frel	U5_ntTrel	0.231081	0.231081
Frel	U5_ntAGrel	0.104073	0.104073
Frel	U5_ntCGrel	0.428844	0.428844
Frel	U5_dintAArel	0.960488	0.960488
Frel	U5_dinetACrel	0.553285	0.553285
Frel	U5_dintAGrel	0.0702846	0.0702846
Frel	U5_dintATrel	0.415706	0.415706
Frel	U5_dintCArel	0.913532	0.913532
Frel	U5_dintCCrel	0.938946	0.938946
Frel	U5_dintCGrel	0.871355	0.871355
Frel	U5_dintCTrel	0.440478	0.440478
Frel	U5_dintGArel	0.055197	0.055197
Frel	U5_dintGCrel	0.949587	0.949587
Frel	U5_dintGGrel	0.279045	0.279045
Frel	U5_dintGTrel	0.928194	0.928194
Frel	U5_dintTArel	0.718081	0.718081
Frel	U5_dintTCrel	0.307927	0.307927
Frel	U5_dintTGrel	0.769367	0.769367
Frel	U5_dintTTrel	0.17373	0.17373
Frel	U3_LENGTH	3.91013e-13	3.91013e-13
Frel	U3_ntArel	0.00431189	0.00431189
Frel	U3_ntCrel	0.580991	0.580991
Frel	U3_ntGrel	0.232945	0.232945
Frel	U3_ntTrel	0.000193831	0.000193831
Frel	U3_ntAGrel	4.50552e-09	4.50552e-09
Frel	U3_ntCGrel	0.527281	0.527281
Frel	U3_dintAArel	0.020619	0.020619
Frel	U3_dinetACrel	0.00917917	0.00917917
Frel	U3_dintAGrel	0.113178	0.113178
Frel	U3_dintATrel	0.770152	0.770152
Frel	U3_dintCArel	0.0669812	0.0669812
Frel	U3_dintCCrel	0.878764	0.878764
Frel	U3_dintCGrel	0.209835	0.209835
Frel	U3_dintCTrel	0.630358	0.630358
Frel	U3_dintGArel	0.0653303	0.0653303
Frel	U3_dintGCrel	0.369161	0.369161
Frel	U3_dintGGrel	0.310125	0.310125
Frel	U3_dintGTrel	0.769458	0.769458
Frel	U3_dintTArel	0.847616	0.847616
Frel	U3_dintTCrel	0.289623	0.289623
Frel	U3_dintTGrel	0.511017	0.511017
Frel	dintTTrel	4.42879e-06	4.42879e-06
Frel	mlength	1.44037e-10	1.44037e-10
Frel	lu3rel	1.96543e-09	1.96543e-09
Frel	lu5rel	0.0782247	0.0782247
Grel	Hrel	1.21158e-92	1.21158e-92
Grel	Irel	6.51775e-72	6.51775e-72
Grel	Lrel	1.26704e-05	1.26704e-05
Grel	Mrel	1.31197e-10	1.31197e-10
Grel	Nrel	0.0494694	0.0494694
Grel	Prel	1.4297e-40	1.4297e-40
Grel	Qrel	5.74262e-85	5.74262e-85
Grel	Rrel	1.65363e-21	1.65363e-21
Grel	Srel	5.05266e-308	5.05266e-308
Grel	Vrel	1.00629e-22	1.00629e-22
Grel	betasheetCHOP780202	4.26979e-25	4.26979e-25
Grel	buriedWERD780101	4.26979e-25	4.26979e-25
Grel	isoelectricpointZIMJ680104	1.65363e-21	1.65363e-21
Grel	netchargeKLEP840101	1.65363e-21	1.65363e-21
Grel	flexibilityVINM940101	1.00629e-22	1.00629e-22
Grel	solventwaterNOZY710101	7.36431e-130	7.36431e-130
Grel	CDS_LENGTH	1.06138e-06	1.06138e-06
Grel	CDS_ntArel	0.0314976	0.0314976
Grel	CDS_ntCrel	0.00147004	0.00147004
Grel	CDS_ntGrel	0.0640428	0.0640428
Grel	CDS_ntTrel	0.606202	0.606202
Grel	CDS_ntAGrel	7.66228e-05	7.66228e-05
Grel	CDS_ntCGrel	0.246617	0.246617
Grel	CDS_dintAArel	0.00163347	0.00163347
Grel	CDS_dinetACrel	0.079383	0.079383
Grel	CDS_dintAGrel	0.177506	0.177506
Grel	CDS_dintATrel	0.878965	0.878965
Grel	CDS_dintCArel	0.0728367	0.0728367
Grel	CDS_dintCCrel	0.00305854	0.00305854
Grel	CDS_dintCGrel	0.245188	0.245188
Grel	CDS_dintCTrel	0.00770711	0.00770711
Grel	CDS_dintGArel	0.0177222	0.0177222
Grel	CDS_dintGCrel	0.284148	0.284148
Grel	CDS_dintGGrel	0.0861971	0.0861971
Grel	CDS_dintGTrel	0.0823272	0.0823272
Grel	CDS_dintTArel	0.461579	0.461579
Grel	CDS_dintTCrel	0.00495397	0.00495397
Grel	CDS_dintTGrel	0.0228563	0.0228563
Grel	CDS_dintTTrel	0.933194	0.933194
Grel	U5_LENGTH	0.267081	0.267081
Grel	U5_ntArel	0.479989	0.479989
Grel	U5_ntCrel	0.908548	0.908548
Grel	U5_ntGrel	0.0171487	0.0171487
Grel	U5_ntTrel	0.000128699	0.000128699
Grel	U5_ntAGrel	0.00312698	0.00312698
Grel	U5_ntCGrel	0.0214113	0.0214113
Grel	U5_dintAArel	0.281821	0.281821
Grel	U5_dinetACrel	0.157064	0.157064
Grel	U5_dintAGrel	0.176588	0.176588
Grel	U5_dintATrel	0.764558	0.764558
Grel	U5_dintCArel	0.904258	0.904258
Grel	U5_dintCCrel	0.992065	0.992065
Grel	U5_dintCGrel	0.383552	0.383552
Grel	U5_dintCTrel	0.00271828	0.00271828
Grel	U5_dintGArel	0.0998732	0.0998732
Grel	U5_dintGCrel	0.13714	0.13714
Grel	U5_dintGGrel	0.0318723	0.0318723
Grel	U5_dintGTrel	0.0159547	0.0159547
Grel	U5_dintTArel	0.327358	0.327358
Grel	U5_dintTCrel	0.0212052	0.0212052
Grel	U5_dintTGrel	0.449083	0.449083
Grel	U5_dintTTrel	0.000663147	0.000663147
Grel	U3_LENGTH	1.9277e-05	1.9277e-05
Grel	U3_ntArel	0.316908	0.316908
Grel	U3_ntCrel	0.141295	0.141295
Grel	U3_ntGrel	0.0220885	0.0220885
Grel	U3_ntTrel	0.0822584	0.0822584
Grel	U3_ntAGrel	0.564092	0.564092
Grel	U3_ntCGrel	0.071559	0.071559
Grel	U3_dintAArel	0.170388	0.170388
Grel	U3_dinetACrel	0.487529	0.487529
Grel	U3_dintAGrel	0.022102	0.022102
Grel	U3_dintATrel	0.360945	0.360945
Grel	U3_dintCArel	0.825522	0.825522
Grel	U3_dintCCrel	0.126397	0.126397
Grel	U3_dintCGrel	0.079608	0.079608
Grel	U3_dintCTrel	0.359078	0.359078
Grel	U3_dintGArel	0.198262	0.198262
Grel	U3_dintGCrel	0.181893	0.181893
Grel	U3_dintGGrel	0.178675	0.178675
Grel	U3_dintGTrel	0.348881	0.348881
Grel	U3_dintTArel	0.842769	0.842769
Grel	U3_dintTCrel	0.974535	0.974535
Grel	U3_dintTGrel	0.15804	0.15804
Grel	dintTTrel	0.00684609	0.00684609
Grel	mlength	6.90633e-07	6.90633e-07
Grel	lu3rel	0.080483	0.080483
Grel	lu5rel	0.00400786	0.00400786
Hrel	Irel	6.02508e-86	6.02508e-86
Hrel	Krel	1.73315e-110	1.73315e-110
Hrel	Lrel	3.10444e-19	3.10444e-19
Hrel	Mrel	1.98072e-10	1.98072e-10
Hrel	Nrel	4.53613e-24	4.53613e-24
Hrel	Prel	3.56197e-110	3.56197e-110
[truncated: 4,666 more rows]

## Sheet: negative dataset
gene	entrez	symbol	name	ID	length	massh	Arel	Crel	Drel	Erel	Frel	Grel	Hrel	Irel	Krel	Lrel	Mrel	Nrel	Prel	Qrel	Rrel	Srel	Trel	Vrel	Wrel	Yrel	alphahelixCHOP780201	betasheetCHOP780202	betaturnCHOP780203	buriedWERD780101	isoelectricpointZIMJ680104	netchargeKLEP840101	hydrophobicmomentEISD860102	positivechargeFAUJ880111	flexibilityVINM940101	vdWaalsvolumeFAUJ880103	partitionenergiesGUYH850105	solventwaterNOZY710101	CDS_LENGTH	CDS_ntArel	CDS_ntCrel	CDS_ntGrel	CDS_ntTrel	CDS_ntAGrel	CDS_ntCGrel	CDS_dintAArel	CDS_dinetACrel	CDS_dintAGrel	CDS_dintATrel
[truncated: 818 more rows]
[truncated: 58 more columns]
