# Supplementary material for: In silico characterization and prediction of global protein–mRNA interactions in yeast
Source: Oxford University Press journal article supplement (doi:10.1093/nar/gkr160), 2011-04-01
Supplement: 1371415_Supplementary_Data.zip [file 1371415_Supplementary_Data.zip › Dataset_S8.txt]

gene	tfcode1	tfcode2	chromosome1	chromosome2	strand1	strand2	start1	start2	stop1	stop2	protlength1	protlength2	pH1	pH2	kDa1	kDa2	G1	G2	A1	A2	L1	L2	M1	M2	F1	F2	W1	W2	K1	K2	Q1	Q2	E1	E2	S1	S2	P1	P2	V1	V2	I1	I2	C1	C2	Y1	Y2	H1	H2	R1
YOR359W_YML001W	0	0	15	13	0	0	1011187	267174	1012758	267800	523	208	9.59	4.62	57.556	23.043	0.038167939	0.052631579	0.041984733	0.090909091	0.091603053	0.066985646	0.026717557	0.014354067	0.022900763	0.04784689	0.007633588	0.009569378	0.049618321	0.071770335	0.082061069	0.043062201	0.020992366	0.066985646	0.16221374	0.086124402	0.082061069	0.014354067	0.02480916	0.076555024	0.055343511	0.062200957	0.001908397	0.019138756	0.026717557	0.028708134	0.030534351	0.009569378	0.02480916
YOR359W_YPL079W	0	0	15	16	0	0	1011187	406633	1012758	407536	523	160	9.59	11.2	57.556	18.274	0.038167939	0.074534161	0.041984733	0.068322981	0.091603053	0.043478261	0.026717557	0.031055901	0.022900763	0.031055901	0.007633588	0	0.049618321	0.105590062	0.082061069	0.055900621	0.020992366	0.049689441	0.16221374	0.055900621	0.082061069	0.037267081	0.02480916	0.099378882	0.055343511	0.055900621	0.001908397	0.00621118	0.026717557	0.049689441	0.030534351	0.037267081	0.02480916
YOR359W_YMR242C	0	0	15	13	0	1	1011187	754219	1012758	753224	523	172	9.59	11.12	57.556	20.437	0.038167939	0.023121387	0.041984733	0.069364162	0.091603053	0.052023121	0.026717557	0.023121387	0.022900763	0.057803468	0.007633588	0.011560694	0.049618321	0.10982659	0.082061069	0.040462428	0.020992366	0.057803468	0.16221374	0.069364162	0.082061069	0.040462428	0.02480916	0.086705202	0.055343511	0.057803468	0.001908397	0	0.026717557	0.052023121	0.030534351	0.040462428	0.02480916
YOR359W_YIL034C	0	0	15	9	0	1	1011187	290088	1012758	289225	523	287	9.59	4.36	57.556	32.629	0.038167939	0.024305556	0.041984733	0.059027778	0.091603053	0.114583333	0.026717557	0.017361111	0.022900763	0.041666667	0.007633588	0.010416667	0.049618321	0.038194444	0.082061069	0.045138889	0.020992366	0.059027778	0.16221374	0.107638889	0.082061069	0.041666667	0.02480916	0.045138889	0.055343511	0.052083333	0.001908397	0.006944444	0.026717557	0.034722222	0.030534351	0.024305556	0.02480916
YOR359W_YJR014W	0	0	15	10	0	0	1011187	461821	1012758	462417	523	198	9.59	8.86	57.556	22.495	0.038167939	0.045226131	0.041984733	0.085427136	0.091603053	0.08040201	0.026717557	0.015075377	0.022900763	0.025125628	0.007633588	0.005025126	0.049618321	0.155778894	0.082061069	0.025125628	0.020992366	0.125628141	0.16221374	0.060301508	0.082061069	0.015075377	0.02480916	0.070351759	0.055343511	0.060301508	0.001908397	0.025125628	0.026717557	0.030150754	0.030534351	0.010050251	0.02480916
YOR359W_YMR002W	0	0	15	13	0	0	1011187	272193	1012758	272663	523	156	9.59	8.53	57.556	16.669	0.038167939	0.089171975	0.041984733	0.127388535	0.091603053	0.031847134	0.026717557	0.038216561	0.022900763	0.025477707	0.007633588	0	0.049618321	0.006369427	0.082061069	0.140127389	0.020992366	0.025477707	0.16221374	0.095541401	0.082061069	0.057324841	0.02480916	0.025477707	0.055343511	0.031847134	0.001908397	0.025477707	0.026717557	0.025477707	0.030534351	0.01910828	0.02480916
YOR359W_YLR370C	0	0	15	12	0	1	1011187	862253	1012758	861717	523	178	9.59	8.11	57.556	20.578	0.038167939	0.027932961	0.041984733	0.055865922	0.091603053	0.111731844	0.026717557	0.027932961	0.022900763	0.083798883	0.007633588	0.005586592	0.049618321	0.05027933	0.082061069	0.027932961	0.020992366	0.033519553	0.16221374	0.067039106	0.082061069	0.067039106	0.02480916	0.055865922	0.055343511	0.044692737	0.001908397	0.011173184	0.026717557	0.044692737	0.030534351	0.016759777	0.02480916
YOR359W_YDR328C	0	0	15	4	0	1	1011187	1126014	1012758	1125430	523	194	9.59	4.19	57.556	22.33	0.038167939	0.025641026	0.041984733	0.051282051	0.091603053	0.066666667	0.026717557	0.025641026	0.022900763	0.025641026	0.007633588	0.015384615	0.049618321	0.051282051	0.082061069	0.015384615	0.020992366	0.112820513	0.16221374	0.087179487	0.082061069	0.035897436	0.02480916	0.076923077	0.055343511	0.051282051	0.001908397	0.005128205	0.026717557	0.015384615	0.030534351	0.020512821	0.02480916
YOR359W_YDR404C	0	0	15	4	0	1	1011187	1277162	1012758	1276647	523	171	9.59	7.83	57.556	19.058	0.038167939	0.081395349	0.041984733	0.029069767	0.091603053	0.069767442	0.026717557	0.023255814	0.022900763	0.063953488	0.007633588	0	0.049618321	0.075581395	0.082061069	0.040697674	0.020992366	0.052325581	0.16221374	0.087209302	0.082061069	0.046511628	0.02480916	0.093023256	0.055343511	0.087209302	0.001908397	0.023255814	0.026717557	0.034883721	0.030534351	0.023255814	0.02480916
YOR359W_YGR019W	0	0	15	7	0	0	1011187	525233	1012758	526648	523	471	9.59	6.78	57.556	52.946	0.038167939	0.065677966	0.041984733	0.086864407	0.091603053	0.093220339	0.026717557	0.008474576	0.022900763	0.048728814	0.007633588	0.012711864	0.049618321	0.084745763	0.082061069	0.040254237	0.020992366	0.065677966	0.16221374	0.059322034	0.082061069	0.061440678	0.02480916	0.042372881	0.055343511	0.061440678	0.001908397	0.016949153	0.026717557	0.046610169	0.030534351	0.025423729	0.02480916
YOR359W_YMR139W	0	0	15	13	0	0	1011187	546124	1012758	547236	523	370	9.59	6.51	57.556	43.004	0.038167939	0.032345013	0.041984733	0.026954178	0.091603053	0.107816712	0.026717557	0.026954178	0.022900763	0.051212938	0.007633588	0.005390836	0.049618321	0.078167116	0.082061069	0.053908356	0.020992366	0.067385445	0.16221374	0.070080863	0.082061069	0.067385445	0.02480916	0.056603774	0.055343511	0.07277628	0.001908397	0.018867925	0.026717557	0.04851752	0.030534351	0.026954178	0.02480916
YOR359W_YHR108W	0	0	15	8	0	0	1011187	328306	1012758	330063	523	585	9.59	6.46	57.556	64.346	0.038167939	0.042662116	0.041984733	0.085324232	0.091603053	0.119453925	0.026717557	0.017064846	0.022900763	0.032423208	0.007633588	0.005119454	0.049618321	0.068259386	0.082061069	0.054607509	0.020992366	0.063139932	0.16221374	0.097269625	0.082061069	0.058020478	0.02480916	0.040955631	0.055343511	0.058020478	0.001908397	0.005119454	0.026717557	0.017064846	0.030534351	0.018771331	0.02480916
YOR359W_YGL009C	0	0	15	7	0	1	1011187	478657	1012758	476318	523	779	9.59	5.74	57.556	85.794	0.038167939	0.080769231	0.041984733	0.078205128	0.091603053	0.074358974	0.026717557	0.019230769	0.022900763	0.042307692	0.007633588	0.01025641	0.049618321	0.076923077	0.082061069	0.033333333	0.020992366	0.070512821	0.16221374	0.06025641	0.082061069	0.051282051	0.02480916	0.061538462	0.055343511	0.070512821	0.001908397	0.014102564	0.026717557	0.021794872	0.030534351	0.021794872	0.02480916
YOR359W_YBR093C	0	0	15	2	0	1	1011187	430945	1012758	429542	523	467	9.59	4.48	57.556	52.858	0.038167939	0.05982906	0.041984733	0.066239316	0.091603053	0.074786325	0.026717557	0.014957265	0.022900763	0.057692308	0.007633588	0.014957265	0.049618321	0.049145299	0.082061069	0.034188034	0.020992366	0.047008547	0.16221374	0.079059829	0.082061069	0.027777778	0.02480916	0.057692308	0.055343511	0.044871795	0.001908397	0.021367521	0.026717557	0.066239316	0.030534351	0.019230769	0.02480916
YOR359W_YMR264W	0	0	15	13	0	0	1011187	795804	1012758	796415	523	203	9.59	6.69	57.556	22.762	0.038167939	0.068627451	0.041984733	0.06372549	0.091603053	0.112745098	0.026717557	0.024509804	0.022900763	0.049019608	0.007633588	0.004901961	0.049618321	0.049019608	0.082061069	0.053921569	0.020992366	0.073529412	0.16221374	0.06372549	0.082061069	0.049019608	0.02480916	0.058823529	0.055343511	0.029411765	0.001908397	0.004901961	0.026717557	0.009803922	0.030534351	0.024509804	0.02480916
YOR359W_YDR284C	0	0	15	4	0	1	1011187	1031416	1012758	1030547	523	289	9.59	6.42	57.556	33.514	0.038167939	0.048275862	0.041984733	0.04137931	0.091603053	0.144827586	0.026717557	0.031034483	0.022900763	0.079310345	0.007633588	0.017241379	0.049618321	0.024137931	0.082061069	0.024137931	0.020992366	0.04137931	0.16221374	0.062068966	0.082061069	0.065517241	0.02480916	0.048275862	0.055343511	0.072413793	0.001908397	0.010344828	0.026717557	0.04137931	0.030534351	0.031034483	0.02480916
YOR359W_YLR347C	0	0	15	12	0	1	1011187	826412	1012758	823827	523	861	9.59	4.34	57.556	94.775	0.038167939	0.038283063	0.041984733	0.118329466	0.091603053	0.104408353	0.026717557	0.02900232	0.022900763	0.038283063	0.007633588	0.010440835	0.049618321	0.040603248	0.082061069	0.063805104	0.020992366	0.06612529	0.16221374	0.076566125	0.082061069	0.039443155	0.02480916	0.062645012	0.055343511	0.068445476	0.001908397	0.012761021	0.026717557	0.027842227	0.030534351	0.006960557	0.02480916
YOR359W_YIR035C	0	0	15	9	0	1	1011187	421787	1012758	421023	523	254	9.59	6.29	57.556	27.48	0.038167939	0.078431373	0.041984733	0.090196078	0.091603053	0.090196078	0.026717557	0.02745098	0.022900763	0.039215686	0.007633588	0.007843137	0.049618321	0.074509804	0.082061069	0.02745098	0.020992366	0.043137255	0.16221374	0.078431373	0.082061069	0.035294118	0.02480916	0.121568627	0.055343511	0.050980392	0.001908397	0.003921569	0.026717557	0.035294118	0.030534351	0.011764706	0.02480916
YOR359W_YCR034W	0	0	15	3	0	0	1011187	190588	1012758	191631	523	347	9.59	10.35	57.556	40.002	0.038167939	0.051724138	0.041984733	0.054597701	0.091603053	0.123563218	0.026717557	0.014367816	0.022900763	0.074712644	0.007633588	0.020114943	0.049618321	0.048850575	0.082061069	0.034482759	0.020992366	0.025862069	0.16221374	0.051724138	0.082061069	0.054597701	0.02480916	0.094827586	0.055343511	0.068965517	0.001908397	0.014367816	0.026717557	0.063218391	0.030534351	0.037356322	0.02480916
YOR359W_YNL048W	0	0	15	14	0	0	1011187	538174	1012758	539820	523	548	9.59	9.7	57.556	63.143	0.038167939	0.054644809	0.041984733	0.043715847	0.091603053	0.091074681	0.026717557	0.02003643	0.022900763	0.061930783	0.007633588	0.027322404	0.049618321	0.096539162	0.082061069	0.029143898	0.020992366	0.047358834	0.16221374	0.071038251	0.082061069	0.049180328	0.02480916	0.061930783	0.055343511	0.0856102	0.001908397	0.012750455	0.026717557	0.043715847	0.030534351	0.016393443	0.02480916
YOR359W_YDR497C	0	0	15	4	0	1	1011187	1445460	1012758	1443706	523	584	9.59	6.51	57.556	63.569	0.038167939	0.087179487	0.041984733	0.075213675	0.091603053	0.090598291	0.026717557	0.022222222	0.022900763	0.063247863	0.007633588	0.013675214	0.049618321	0.041025641	0.082061069	0.034188034	0.020992366	0.046153846	0.16221374	0.083760684	0.082061069	0.032478632	0.02480916	0.073504274	0.055343511	0.102564103	0.001908397	0.015384615	0.026717557	0.025641026	0.030534351	0.013675214	0.02480916
YOR359W_YDR408C	0	0	15	4	0	1	1011187	1288852	1012758	1288208	523	214	9.59	6.4	57.556	23.54	0.038167939	0.060465116	0.041984733	0.097674419	0.091603053	0.106976744	0.026717557	0.013953488	0.022900763	0.013953488	0.007633588	0.009302326	0.049618321	0.079069767	0.082061069	0.055813953	0.020992366	0.079069767	0.16221374	0.055813953	0.082061069	0.041860465	0.02480916	0.074418605	0.055343511	0.079069767	0.001908397	0.023255814	0.026717557	0.027906977	0.030534351	0.03255814	0.02480916
YOR359W_YOR086C	0	0	15	15	0	1	1011187	486781	1012758	483221	523	1186	9.59	7.15	57.556	133.575	0.038167939	0.059814659	0.041984733	0.052232519	0.091603053	0.096040438	0.026717557	0.01600674	0.022900763	0.039595619	0.007633588	0.01432182	0.049618321	0.096882898	0.082061069	0.032013479	0.020992366	0.069924179	0.16221374	0.062342039	0.082061069	0.043807919	0.02480916	0.077506318	0.055343511	0.066554339	0.001908397	0.00589722	0.026717557	0.032013479	0.030534351	0.01095198	0.02480916
YOR359W_YMR038C	0	0	15	13	0	1	1011187	348259	1012758	347510	523	249	9.59	6.65	57.556	27.33	0.038167939	0.068	0.041984733	0.072	0.091603053	0.056	0.026717557	0.012	0.022900763	0.032	0.007633588	0.016	0.049618321	0.08	0.082061069	0.028	0.020992366	0.068	0.16221374	0.08	0.082061069	0.04	0.02480916	0.076	0.055343511	0.076	0.001908397	0.028	0.026717557	0.024	0.030534351	0.02	0.02480916
YOR359W_YIL016W	0	0	15	9	0	0	1011187	321452	1012758	321931	523	159	9.59	10.37	57.556	18.306	0.038167939	0.0375	0.041984733	0.0375	0.091603053	0.125	0.026717557	0.025	0.022900763	0.01875	0.007633588	0.00625	0.049618321	0.1375	0.082061069	0.01875	0.020992366	0.0875	0.16221374	0.09375	0.082061069	0.025	0.02480916	0.0625	0.055343511	0.0625	0.001908397	0.00625	0.026717557	0.025	0.030534351	0.0125	0.02480916
YOR359W_YKL112W	0	0	15	11	0	0	1011187	226214	1012758	228409	523	731	9.59	4.74	57.556	81.752	0.038167939	0.046448087	0.041984733	0.045081967	0.091603053	0.06284153	0.026717557	0.015027322	0.022900763	0.019125683	0.007633588	0.00273224	0.049618321	0.06557377	0.082061069	0.031420765	0.020992366	0.06147541	0.16221374	0.096994536	0.082061069	0.032786885	0.02480916	0.054644809	0.055343511	0.047814208	0.001908397	0.004098361	0.026717557	0.024590164	0.030534351	0.053278689	0.02480916
YOR359W_YJL062W	0	0	15	10	0	0	1011187	317278	1012758	319770	523	830	9.59	6.04	57.556	94.85	0.038167939	0.0433213	0.041984733	0.057761733	0.091603053	0.126353791	0.026717557	0.026474128	0.022900763	0.080625752	0.007633588	0.028880866	0.049618321	0.037304452	0.082061069	0.050541516	0.020992366	0.027677497	0.16221374	0.077015644	0.082061069	0.039711191	0.02480916	0.06377858	0.055343511	0.08423586	0.001908397	0.013237064	0.026717557	0.030084236	0.030534351	0.026474128	0.02480916
YOR359W_YNL052W	0	0	15	14	0	0	1011187	531726	1012758	532187	523	153	9.59	10.64	57.556	17.14	0.038167939	0.077922078	0.041984733	0.090909091	0.091603053	0.084415584	0.026717557	0.032467532	0.022900763	0.032467532	0.007633588	0.038961039	0.049618321	0.071428571	0.082061069	0.071428571	0.020992366	0.051948052	0.16221374	0.097402597	0.082061069	0.038961039	0.02480916	0.064935065	0.055343511	0.025974026	0.001908397	0	0.026717557	0.025974026	0.030534351	0.006493506	0.02480916
YOR359W_YGR102C	0	0	15	7	0	1	1011187	695139	1012758	694588	523	183	9.59	10.36	57.556	20.787	0.038167939	0.081521739	0.041984733	0.059782609	0.091603053	0.114130435	0.026717557	0.016304348	0.022900763	0.02173913	0.007633588	0.016304348	0.049618321	0.114130435	0.082061069	0.038043478	0.020992366	0.086956522	0.16221374	0.059782609	0.082061069	0.027173913	0.02480916	0.054347826	0.055343511	0.043478261	0.001908397	0.010869565	0.026717557	0.032608696	0.030534351	0.038043478	0.02480916
YOR359W_YLR353W	0	0	15	12	0	0	1011187	834351	1012758	836162	523	603	9.59	6.23	57.556	66.288	0.038167939	0.056291391	0.041984733	0.044701987	0.091603053	0.064569536	0.026717557	0.016556291	0.022900763	0.031456954	0.007633588	0.004966887	0.049618321	0.051324503	0.082061069	0.031456954	0.020992366	0.07615894	0.16221374	0.149006623	0.082061069	0.064569536	0.02480916	0.046357616	0.055343511	0.069536424	0.001908397	0.008278146	0.026717557	0.016556291	0.030534351	0.026490066	0.02480916
YOR359W_YKL063C	0	0	15	11	0	1	1011187	321162	1012758	320659	523	167	9.59	10.2	57.556	19.003	0.038167939	0.041666667	0.041984733	0.071428571	0.091603053	0.077380952	0.026717557	0.011904762	0.022900763	0.011904762	0.007633588	0	0.049618321	0.148809524	0.082061069	0.083333333	0.020992366	0.071428571	0.16221374	0.05952381	0.082061069	0.029761905	0.02480916	0.047619048	0.055343511	0.06547619	0.001908397	0.005952381	0.026717557	0.035714286	0.030534351	0.011904762	0.02480916
YOR359W_YLR410W	0	0	15	12	0	0	1011187	937539	1012758	940979	523	1146	9.59	9.11	57.556	129.754	0.038167939	0.048823017	0.041984733	0.048823017	0.091603053	0.087183958	0.026717557	0.025283348	0.022900763	0.040104621	0.007633588	0.008718396	0.049618321	0.098517873	0.082061069	0.030514385	0.020992366	0.071490846	0.16221374	0.088055798	0.082061069	0.056669573	0.02480916	0.053182214	0.055343511	0.066259808	0.001908397	0.009590235	0.026717557	0.024411508	0.030534351	0.022667829	0.02480916
YOR359W_YLR034C	0	0	15	12	0	1	1011187	211934	1012758	210513	523	473	9.59	8.1	57.556	51.775	0.038167939	0.063291139	0.041984733	0.08649789	0.091603053	0.147679325	0.026717557	0.016877637	0.022900763	0.052742616	0.007633588	0.008438819	0.049618321	0.048523207	0.082061069	0.02742616	0.020992366	0.029535865	0.16221374	0.071729958	0.082061069	0.040084388	0.02480916	0.082278481	0.055343511	0.097046414	0.001908397	0.021097046	0.026717557	0.046413502	0.030534351	0.014767932	0.02480916
YOR359W_YLR450W	0	0	15	12	0	0	1011187	1032624	1012758	1035761	523	1045	9.59	7.52	57.556	115.691	0.038167939	0.051625239	0.041984733	0.073613767	0.091603053	0.115678776	0.026717557	0.023900574	0.022900763	0.04206501	0.007633588	0.006692161	0.049618321	0.056405354	0.082061069	0.027724665	0.020992366	0.04875717	0.16221374	0.093690249	0.082061069	0.041108987	0.02480916	0.070745698	0.055343511	0.078393881	0.001908397	0.018164436	0.026717557	0.040152964	0.030534351	0.020076482	0.02480916
YOR359W_YHR086W	0	0	15	8	0	0	1011187	278155	1012758	279726	523	523	9.59	8.45	57.556	56.972	0.038167939	0.080152672	0.041984733	0.057251908	0.091603053	0.082061069	0.026717557	0.032442748	0.022900763	0.04389313	0.007633588	0.009541985	0.049618321	0.032442748	0.082061069	0.070610687	0.020992366	0.02480916	0.16221374	0.125954198	0.082061069	0.041984733	0.02480916	0.059160305	0.055343511	0.032442748	0.001908397	0.011450382	0.026717557	0.036259542	0.030534351	0.011450382	0.02480916
YOR359W_YDR397C	0	0	15	4	0	1	1011187	1266891	1012758	1266359	523	146	9.59	4.72	57.556	16.65	0.038167939	0.027210884	0.041984733	0.054421769	0.091603053	0.095238095	0.026717557	0.040816327	0.022900763	0.047619048	0.007633588	0	0.049618321	0.088435374	0.082061069	0.040816327	0.020992366	0.129251701	0.16221374	0.12244898	0.082061069	0.027210884	0.02480916	0.040816327	0.055343511	0.081632653	0.001908397	0	0.026717557	0.006802721	0.030534351	0.020408163	0.02480916
YOR359W_YCR067C	0	0	15	3	0	1	1011187	236318	1012758	233121	523	1065	9.59	4.45	57.556	114.078	0.038167939	0.033771107	0.041984733	0.063789869	0.091603053	0.072232645	0.026717557	0.015009381	0.022900763	0.041275797	0.007633588	0.001876173	0.049618321	0.042213884	0.082061069	0.019699812	0.020992366	0.066604128	0.16221374	0.182926829	0.082061069	0.045966229	0.02480916	0.074108818	0.055343511	0.071294559	0.001908397	0.001876173	0.026717557	0.01782364	0.030534351	0.015947467	0.02480916
YOR359W_YBR016W	0	0	15	2	0	0	1011187	270247	1012758	270633	523	128	9.59	7.25	57.556	14.617	0.038167939	0.108527132	0.041984733	0.054263566	0.091603053	0.031007752	0.026717557	0.023255814	0.022900763	0.007751938	0.007633588	0	0.049618321	0.015503876	0.082061069	0.255813953	0.020992366	0.023255814	0.16221374	0.046511628	0.082061069	0.07751938	0.02480916	0.015503876	0.055343511	0.007751938	0.001908397	0.03875969	0.026717557	0.11627907	0.030534351	0.023255814	0.02480916
YOR359W_YIL083C	0	0	15	9	0	1	1011187	204650	1012758	203553	523	365	9.59	8.59	57.556	41.893	0.038167939	0.038251366	0.041984733	0.054644809	0.091603053	0.106557377	0.026717557	0.016393443	0.022900763	0.049180328	0.007633588	0.010928962	0.049618321	0.081967213	0.082061069	0.032786885	0.020992366	0.071038251	0.16221374	0.06557377	0.082061069	0.049180328	0.02480916	0.057377049	0.055343511	0.068306011	0.001908397	0.005464481	0.026717557	0.038251366	0.030534351	0.027322404	0.02480916
YOR359W_YDR348C	0	0	15	4	0	1	1011187	1171820	1012758	1170321	523	499	9.59	10.32	57.556	54.995	0.038167939	0.07	0.041984733	0.048	0.091603053	0.054	0.026717557	0.01	0.022900763	0.032	0.007633588	0.002	0.049618321	0.066	0.082061069	0.04	0.020992366	0.046	0.16221374	0.146	0.082061069	0.06	0.02480916	0.054	0.055343511	0.022	0.001908397	0	0.026717557	0.026	0.030534351	0.03	0.02480916
YOR359W_YMR225C	0	0	15	13	0	1	1011187	721402	1012758	720959	523	98	9.59	10.38	57.556	11.476	0.038167939	0.02020202	0.041984733	0.050505051	0.091603053	0.070707071	0.026717557	0.060606061	0.022900763	0.050505051	0.007633588	0	0.049618321	0.121212121	0.082061069	0.050505051	0.020992366	0.060606061	0.16221374	0.050505051	0.082061069	0.050505051	0.02480916	0.080808081	0.055343511	0.060606061	0.001908397	0	0.026717557	0.03030303	0.030534351	0.04040404	0.02480916
YOR359W_YOR243C	0	0	15	15	0	1	1011187	792242	1012758	790212	523	676	9.59	7.9	57.556	77.002	0.038167939	0.050221566	0.041984733	0.06351551	0.091603053	0.087149188	0.026717557	0.025110783	0.022900763	0.033973412	0.007633588	0.005908419	0.049618321	0.085672083	0.082061069	0.038404727	0.020992366	0.081240768	0.16221374	0.069423929	0.082061069	0.029542097	0.02480916	0.064992614	0.055343511	0.059084195	0.001908397	0.005908419	0.026717557	0.032496307	0.030534351	0.014771049	0.02480916
YOR359W_YGR155W	0	0	15	7	0	0	1011187	798548	1012758	800071	523	507	9.59	6.66	57.556	56.021	0.038167939	0.068897638	0.041984733	0.06496063	0.091603053	0.100393701	0.026717557	0.011811024	0.022900763	0.033464567	0.007633588	0.007874016	0.049618321	0.100393701	0.082061069	0.023622047	0.020992366	0.059055118	0.16221374	0.07480315	0.082061069	0.039370079	0.02480916	0.066929134	0.055343511	0.076771654	0.001908397	0.001968504	0.026717557	0.031496063	0.030534351	0.013779528	0.02480916
YOR359W_YKL210W	0	0	15	11	0	0	1011187	39164	1012758	42238	523	1024	9.59	4.81	57.556	114.265	0.038167939	0.064390244	0.041984733	0.056585366	0.091603053	0.094634146	0.026717557	0.013658537	0.022900763	0.063414634	0.007633588	0.005853659	0.049618321	0.077073171	0.082061069	0.033170732	0.020992366	0.069268293	0.16221374	0.071219512	0.082061069	0.047804878	0.02480916	0.073170732	0.055343511	0.056585366	0.001908397	0.009756098	0.026717557	0.024390244	0.030534351	0.015609756	0.02480916
YOR359W_YDR233C	0	0	15	4	0	1	1011187	930354	1012758	929467	523	295	9.59	9.64	57.556	32.916	0.038167939	0.037162162	0.041984733	0.077702703	0.091603053	0.097972973	0.026717557	0.010135135	0.022900763	0.064189189	0.007633588	0.010135135	0.049618321	0.097972973	0.082061069	0.074324324	0.020992366	0.057432432	0.16221374	0.084459459	0.082061069	0.054054054	0.02480916	0.067567568	0.055343511	0.054054054	0.001908397	0.013513514	0.026717557	0.023648649	0.030534351	0.027027027	0.02480916
YOR359W_YDL061C	0	0	15	4	0	1	1011187	340798	1012758	340628	523	56	9.59	10.8	57.556	6.728	0.038167939	0.070175439	0.041984733	0.035087719	0.091603053	0.035087719	0.026717557	0.01754386	0.022900763	0.070175439	0.007633588	0.01754386	0.049618321	0.070175439	0.082061069	0.035087719	0.020992366	0.035087719	0.16221374	0.070175439	0.082061069	0.01754386	0.02480916	0.052631579	0.055343511	0.035087719	0.001908397	0.070175439	0.026717557	0.035087719	0.030534351	0.070175439	0.02480916
YOR359W_YKL167C	0	0	15	11	0	1	1011187	134139	1012758	133726	523	137	9.59	10.15	57.556	16.021	0.038167939	0.036231884	0.041984733	0.02173913	0.091603053	0.094202899	0.026717557	0.043478261	0.022900763	0.036231884	0.007633588	0.007246377	0.049618321	0.101449275	0.082061069	0.050724638	0.020992366	0.065217391	0.16221374	0.050724638	0.082061069	0.057971014	0.02480916	0.065217391	0.055343511	0.086956522	0.001908397	0.007246377	0.026717557	0.02173913	0.030534351	0.043478261	0.02480916
YOR359W_YCR057C	0	0	15	3	0	1	1011187	223224	1012758	220453	523	923	9.59	4.79	57.556	103.982	0.038167939	0.057359307	0.041984733	0.062770563	0.091603053	0.081168831	0.026717557	0.014069264	0.022900763	0.064935065	0.007633588	0.015151515	0.049618321	0.056277056	0.082061069	0.036796537	0.020992366	0.066017316	0.16221374	0.093073593	0.082061069	0.027056277	0.02480916	0.069264069	0.055343511	0.05952381	0.001908397	0.008658009	0.026717557	0.023809524	0.030534351	0.019480519	0.02480916
YOR359W_YGR108W	0	0	15	7	0	0	1011187	703640	1012758	705055	523	471	9.59	5.77	57.556	54.87	0.038167939	0.036016949	0.041984733	0.036016949	0.091603053	0.101694915	0.026717557	0.027542373	0.022900763	0.046610169	0.007633588	0.01059322	0.049618321	0.084745763	0.082061069	0.040254237	0.020992366	0.084745763	0.16221374	0.082627119	0.082061069	0.023305085	0.02480916	0.042372881	0.055343511	0.082627119	0.001908397	0.016949153	0.026717557	0.038135593	0.030534351	0.021186441	0.02480916
YOR359W_YBR268W	0	0	15	2	0	0	1011187	741294	1012758	741611	523	105	9.59	10.67	57.556	11.949	0.038167939	0.037735849	0.041984733	0.075471698	0.091603053	0.122641509	0.026717557	0.009433962	0.022900763	0.009433962	0.007633588	0.028301887	0.049618321	0.08490566	0.082061069	0.037735849	0.020992366	0.047169811	0.16221374	0.103773585	0.082061069	0.037735849	0.02480916	0.066037736	0.055343511	0.047169811	0.001908397	0.009433962	0.026717557	0.028301887	0.030534351	0.018867925	0.02480916
YOR359W_YBR106W	0	0	15	2	0	0	1011187	452652	1012758	453218	523	188	9.59	10	57.556	21.137	0.038167939	0.074074074	0.041984733	0.063492063	0.091603053	0.063492063	0.026717557	0.084656085	0.022900763	0.026455026	0.007633588	0.005291005	0.049618321	0.084656085	0.082061069	0.031746032	0.020992366	0.058201058	0.16221374	0.068783069	0.082061069	0.047619048	0.02480916	0.047619048	0.055343511	0.100529101	0.001908397	0.005291005	0.026717557	0.042328042	0.030534351	0.015873016	0.02480916
YOR359W_YDL047W	0	0	15	4	0	0	1011187	369769	1012758	370704	523	311	9.59	5.17	57.556	35.537	0.038167939	0.070512821	0.041984733	0.051282051	0.091603053	0.092948718	0.026717557	0.025641026	0.022900763	0.051282051	0.007633588	0.019230769	0.049618321	0.048076923	0.082061069	0.041666667	0.020992366	0.073717949	0.16221374	0.048076923	0.082061069	0.041666667	0.02480916	0.083333333	0.055343511	0.048076923	0.001908397	0.032051282	0.026717557	0.044871795	0.030534351	0.028846154	0.02480916
YOR359W_YDR477W	0	0	15	4	0	0	1011187	1412366	1012758	1414267	523	633	9.59	6.65	57.556	72.045	0.038167939	0.045741325	0.041984733	0.052050473	0.091603053	0.086750789	0.026717557	0.029968454	0.022900763	0.031545741	0.007633588	0.011041009	0.049618321	0.075709779	0.082061069	0.03785489	0.020992366	0.066246057	0.16221374	0.093059937	0.082061069	0.047318612	0.02480916	0.045741325	0.055343511	0.074132492	0.001908397	0.006309148	0.026717557	0.036277603	0.030534351	0.048895899	0.02480916
YCL011C_YBL018C	0	0	3	2	1	1	103358	186477	102075	186001	427	133	6.16	4.55	48.728	15.512	0.102803738	0.037313433	0.044392523	0.037313433	0.053738318	0.097014925	0.021028037	0.02238806	0.058411215	0.044776119	0.004672897	0.029850746	0.039719626	0.067164179	0.028037383	0.044776119	0.077102804	0.074626866	0.063084112	0.104477612	0.037383178	0.007462687	0.051401869	0.059701493	0.039719626	0.059701493	0.014018692	0.014925373	0.03271028	0.037313433	0.011682243	0.02238806	0.11682243
YCL011C_YOL111C	0	0	3	15	1	1	103358	108896	102075	108258	427	212	6.16	10.01	48.728	23.732	0.102803738	0.023474178	0.044392523	0.070422535	0.053738318	0.122065728	0.021028037	0.014084507	0.058411215	0.028169014	0.004672897	0.009389671	0.039719626	0.122065728	0.028037383	0.056338028	0.077102804	0.0657277	0.063084112	0.079812207	0.037383178	0.079812207	0.051401869	0.046948357	0.039719626	0.051643192	0.014018692	0	0.03271028	0.014084507	0.011682243	0.03286385	0.11682243
YCL011C_YDR465C	0	0	3	4	1	1	103358	1394567	102075	1393329	427	412	6.16	4.27	48.728	47.469	0.102803738	0.05811138	0.044392523	0.053268765	0.053738318	0.0968523	0.021028037	0.026634383	0.058411215	0.046004843	0.004672897	0.012106538	0.039719626	0.055690073	0.028037383	0.031476998	0.077102804	0.094430993	0.063084112	0.04842615	0.037383178	0.036319613	0.051401869	0.062953995	0.039719626	0.053268765	0.014018692	0.00968523	0.03271028	0.05811138	0.011682243	0.01937046	0.11682243
YCL011C_YMR236W	0	0	3	13	1	0	103358	742970	102075	743443	427	157	6.16	6.27	48.728	17.315	0.102803738	0.082278481	0.044392523	0.082278481	0.053738318	0.120253165	0.021028037	0.03164557	0.058411215	0.012658228	0.004672897	0.012658228	0.039719626	0.063291139	0.028037383	0.063291139	0.077102804	0.063291139	0.063084112	0.063291139	0.037383178	0.056962025	0.051401869	0.069620253	0.039719626	0.018987342	0.014018692	0.006329114	0.03271028	0.037974684	0.011682243	0.018987342	0.11682243
YCL011C_YGL087C	0	0	3	7	1	1	103358	346907	102075	346409	427	137	6.16	6.76	48.728	15.545	0.102803738	0.065217391	0.044392523	0.028985507	0.053738318	0.094202899	0.021028037	0.028985507	0.058411215	0.036231884	0.004672897	0.014492754	0.039719626	0.079710145	0.028037383	0.014492754	0.077102804	0.079710145	0.063084112	0.065217391	0.037383178	0.086956522	0.051401869	0.028985507	0.039719626	0.043478261	0.014018692	0.02173913	0.03271028	0.028985507	0.011682243	0.02173913	0.11682243
YCL011C_YOL136C	0	0	3	15	1	1	103358	68754	102075	67561	427	397	6.16	5.47	48.728	45.317	0.102803738	0.035175879	0.044392523	0.032663317	0.053738318	0.090452261	0.021028037	0.010050251	0.058411215	0.08040201	0.004672897	0	0.039719626	0.055276382	0.028037383	0.030150754	0.077102804	0.057788945	0.063084112	0.120603015	0.037383178	0.032663317	0.051401869	0.040201005	0.039719626	0.072864322	0.014018692	0.020100503	0.03271028	0.037688442	0.011682243	0.030150754	0.11682243
YCL011C_YER117W	0	0	3	5	1	0	103358	396765	102075	397649	427	137	6.16	11.11	48.728	14.473	0.102803738	0.123188406	0.044392523	0.108695652	0.053738318	0.065217391	0.021028037	0.043478261	0.058411215	0.02173913	0.004672897	0.014492754	0.039719626	0.079710145	0.028037383	0.014492754	0.077102804	0.028985507	0.063084112	0.072463768	0.037383178	0.050724638	0.051401869	0.101449275	0.039719626	0.050724638	0.014018692	0.014492754	0.03271028	0.014492754	0.011682243	0	0.11682243
YCL011C_YPL066W	0	0	3	16	1	0	103358	426230	102075	427669	427	479	6.16	10.19	48.728	54.893	0.102803738	0.025	0.044392523	0.00625	0.053738318	0.0875	0.021028037	0.008333333	0.058411215	0.060416667	0.004672897	0.002083333	0.039719626	0.077083333	0.028037383	0.039583333	0.077102804	0.035416667	0.063084112	0.120833333	0.037383178	0.070833333	0.051401869	0.039583333	0.039719626	0.095833333	0.014018692	0.0125	0.03271028	0.0375	0.011682243	0.01875	0.11682243
YCL011C_YDL147W	0	0	3	4	1	0	103358	190925	102075	192262	427	445	6.16	6.05	48.728	51.768	0.102803738	0.022421525	0.044392523	0.044843049	0.053738318	0.1367713	0.021028037	0.01793722	0.058411215	0.01793722	0.004672897	0.011210762	0.039719626	0.103139013	0.028037383	0.053811659	0.077102804	0.100896861	0.063084112	0.073991031	0.037383178	0.020179372	0.051401869	0.060538117	0.039719626	0.078475336	0.014018692	0.004484305	0.03271028	0.040358744	0.011682243	0.024663677	0.11682243
YCL011C_YBR212W	0	0	3	2	1	0	103358	647881	102075	649899	427	672	6.16	8.23	48.728	75.023	0.102803738	0.050520059	0.044392523	0.053491828	0.053738318	0.078751857	0.021028037	0.043090639	0.058411215	0.040118871	0.004672897	0.007429421	0.039719626	0.037147103	0.028037383	0.077265973	0.077102804	0.038632987	0.063084112	0.108469539	0.037383178	0.069836553	0.051401869	0.037147103	0.039719626	0.043090639	0.014018692	0.005943536	0.03271028	0.026745914	0.011682243	0.020802377	0.11682243
YCL011C_YEL044W	0	0	3	5	1	0	103358	69757	102075	70257	427	166	6.16	11.05	48.728	18.533	0.102803738	0.05988024	0.044392523	0.083832335	0.053738318	0.071856287	0.021028037	0.011976048	0.058411215	0.035928144	0.004672897	0	0.039719626	0.089820359	0.028037383	0.017964072	0.077102804	0.047904192	0.063084112	0.107784431	0.037383178	0.053892216	0.051401869	0.047904192	0.039719626	0.041916168	0.014018692	0.005988024	0.03271028	0.041916168	0.011682243	0.017964072	0.11682243
YCL011C_YFR049W	0	0	3	6	1	0	103358	248510	102075	248881	427	123	6.16	10.3	48.728	13.689	0.102803738	0.048387097	0.044392523	0.080645161	0.053738318	0.064516129	0.021028037	0.032258065	0.058411215	0.048387097	0.004672897	0.008064516	0.039719626	0.080645161	0.028037383	0.008064516	0.077102804	0.072580645	0.063084112	0.088709677	0.037383178	0.088709677	0.051401869	0.080645161	0.039719626	0.064516129	0.014018692	0.016129032	0.03271028	0.024193548	0.011682243	0.040322581	0.11682243
YCL011C_YNL288W	0	0	3	14	1	0	103358	90303	102075	91424	427	373	6.16	7.1	48.728	41.155	0.102803738	0.07486631	0.044392523	0.048128342	0.053738318	0.139037433	0.021028037	0.037433155	0.058411215	0.032085561	0.004672897	0.005347594	0.039719626	0.032085561	0.028037383	0.042780749	0.077102804	0.042780749	0.063084112	0.06684492	0.037383178	0.056149733	0.051401869	0.06684492	0.039719626	0.045454545	0.014018692	0.018716578	0.03271028	0.021390374	0.011682243	0.018716578	0.11682243
YCL011C_YHR018C	0	0	3	8	1	1	103358	141395	102075	140004	427	463	6.16	5.55	48.728	51.989	0.102803738	0.084051724	0.044392523	0.066810345	0.053738318	0.122844828	0.021028037	0.028017241	0.058411215	0.043103448	0.004672897	0.010775862	0.039719626	0.058189655	0.028037383	0.034482759	0.077102804	0.068965517	0.063084112	0.058189655	0.037383178	0.025862069	0.051401869	0.047413793	0.039719626	0.051724138	0.014018692	0.00862069	0.03271028	0.034482759	0.011682243	0.028017241	0.11682243
YCL011C_YMR015C	0	0	3	13	1	1	103358	302484	102075	300868	427	538	6.16	7.88	48.728	61.334	0.102803738	0.033395176	0.044392523	0.079777365	0.053738318	0.092764378	0.021028037	0.029684601	0.058411215	0.059369202	0.004672897	0.016697588	0.039719626	0.087198516	0.028037383	0.029684601	0.077102804	0.05380334	0.063084112	0.059369202	0.037383178	0.05380334	0.051401869	0.072356215	0.039719626	0.064935065	0.014018692	0.022263451	0.03271028	0.038961039	0.011682243	0.024118738	0.11682243
YCL011C_YGL213C	0	0	3	7	1	1	103358	91251	102075	90058	427	397	6.16	5.34	48.728	44.231	0.102803738	0.065326633	0.044392523	0.060301508	0.053738318	0.09798995	0.021028037	0.01758794	0.058411215	0.057788945	0.004672897	0.025125628	0.039719626	0.057788945	0.028037383	0.01758794	0.077102804	0.06281407	0.063084112	0.120603015	0.037383178	0.022613065	0.051401869	0.055276382	0.039719626	0.047738693	0.014018692	0.022613065	0.03271028	0.015075377	0.011682243	0.035175879	0.11682243
YCL011C_YPL273W	0	0	3	16	1	0	103358	25087	102075	26064	427	325	6.16	4.98	48.728	36.668	0.102803738	0.064417178	0.044392523	0.049079755	0.053738318	0.088957055	0.021028037	0.015337423	0.058411215	0.04601227	0.004672897	0.018404908	0.039719626	0.064417178	0.028037383	0.030674847	0.077102804	0.070552147	0.063084112	0.079754601	0.037383178	0.049079755	0.051401869	0.04601227	0.039719626	0.088957055	0.014018692	0.018404908	0.03271028	0.036809816	0.011682243	0.015337423	0.11682243
YCL011C_YDR503C	0	0	3	4	1	1	103358	1455859	102075	1455035	427	274	6.16	8.25	48.728	31.586	0.102803738	0.043636364	0.044392523	0.029090909	0.053738318	0.123636364	0.021028037	0.036363636	0.058411215	0.054545455	0.004672897	0.025454545	0.039719626	0.054545455	0.028037383	0.018181818	0.077102804	0.029090909	0.063084112	0.087272727	0.037383178	0.04	0.051401869	0.08	0.039719626	0.083636364	0.014018692	0.036363636	0.03271028	0.036363636	0.011682243	0.025454545	0.11682243
YCL011C_YDR497C	0	0	3	4	1	1	103358	1445460	102075	1443706	427	584	6.16	6.51	48.728	63.569	0.102803738	0.087179487	0.044392523	0.075213675	0.053738318	0.090598291	0.021028037	0.022222222	0.058411215	0.063247863	0.004672897	0.013675214	0.039719626	0.041025641	0.028037383	0.034188034	0.077102804	0.046153846	0.063084112	0.083760684	0.037383178	0.032478632	0.051401869	0.073504274	0.039719626	0.102564103	0.014018692	0.015384615	0.03271028	0.025641026	0.011682243	0.013675214	0.11682243
YCL011C_YLR258W	0	0	3	12	1	0	103358	660718	102075	662835	427	705	6.16	6.32	48.728	80.078	0.102803738	0.065155807	0.044392523	0.073654391	0.053738318	0.099150142	0.021028037	0.019830028	0.058411215	0.050991501	0.004672897	0.011331445	0.039719626	0.052407932	0.028037383	0.028328612	0.077102804	0.062322946	0.063084112	0.049575071	0.037383178	0.043909348	0.051401869	0.073654391	0.039719626	0.04815864	0.014018692	0.009915014	0.03271028	0.041076487	0.011682243	0.033994334	0.11682243
YCL011C_YLR154C	0	0	3	12	1	1	103358	448315	102075	447983	427	110	6.16	4.52	48.728	12.482	0.102803738	0.054054054	0.044392523	0.045045045	0.053738318	0.063063063	0.021028037	0.018018018	0.058411215	0.054054054	0.004672897	0	0.039719626	0.063063063	0.028037383	0.027027027	0.077102804	0.09009009	0.063084112	0.09009009	0.037383178	0.027027027	0.051401869	0.045045045	0.039719626	0.063063063	0.014018692	0	0.03271028	0.054054054	0.011682243	0	0.11682243
YCL011C_YMR002W	0	0	3	13	1	0	103358	272193	102075	272663	427	156	6.16	8.53	48.728	16.669	0.102803738	0.089171975	0.044392523	0.127388535	0.053738318	0.031847134	0.021028037	0.038216561	0.058411215	0.025477707	0.004672897	0	0.039719626	0.006369427	0.028037383	0.140127389	0.077102804	0.025477707	0.063084112	0.095541401	0.037383178	0.057324841	0.051401869	0.025477707	0.039719626	0.031847134	0.014018692	0.025477707	0.03271028	0.025477707	0.011682243	0.01910828	0.11682243
YCL011C_YEL060C	0	0	3	5	1	1	103358	41953	102075	40046	427	635	6.16	6.37	48.728	69.621	0.102803738	0.086477987	0.044392523	0.077044025	0.053738318	0.070754717	0.021028037	0.011006289	0.058411215	0.044025157	0.004672897	0.006289308	0.039719626	0.094339623	0.028037383	0.033018868	0.077102804	0.066037736	0.063084112	0.081761006	0.037383178	0.033018868	0.051401869	0.051886792	0.039719626	0.055031447	0.014018692	0.006289308	0.03271028	0.020440252	0.011682243	0.04245283	0.11682243
YCL011C_YNL081C	0	0	3	14	1	1	103358	476620	102075	476189	427	143	6.16	11.21	48.728	16.089	0.102803738	0.083333333	0.044392523	0.069444444	0.053738318	0.069444444	0.021028037	0.041666667	0.058411215	0.034722222	0.004672897	0.013888889	0.039719626	0.111111111	0.028037383	0.034722222	0.077102804	0.034722222	0.063084112	0.076388889	0.037383178	0.027777778	0.051401869	0.041666667	0.039719626	0.097222222	0.014018692	0.013888889	0.03271028	0.020833333	0.011682243	0.048611111	0.11682243
YCL011C_YHR104W	0	0	3	8	1	0	103358	323412	102075	324395	427	327	6.16	7.07	48.728	37.118	0.102803738	0.067073171	0.044392523	0.051829268	0.053738318	0.109756098	0.021028037	0.012195122	0.058411215	0.048780488	0.004672897	0.015243902	0.039719626	0.088414634	0.028037383	0.036585366	0.077102804	0.067073171	0.063084112	0.054878049	0.037383178	0.045731707	0.051401869	0.06097561	0.039719626	0.073170732	0.014018692	0.018292683	0.03271028	0.036585366	0.011682243	0.033536585	0.11682243
YCL011C_YNL010W	0	0	3	14	1	0	103358	613636	102075	614361	427	241	6.16	5.18	48.728	27.48	0.102803738	0.05785124	0.044392523	0.045454545	0.053738318	0.078512397	0.021028037	0.024793388	0.058411215	0.066115702	0.004672897	0.008264463	0.039719626	0.111570248	0.028037383	0.02892562	0.077102804	0.082644628	0.063084112	0.05785124	0.037383178	0.033057851	0.051401869	0.078512397	0.039719626	0.066115702	0.014018692	0.016528926	0.03271028	0.024793388	0.011682243	0.020661157	0.11682243
YCL011C_YKL156W	0	0	3	11	1	0	103358	158619	102075	159217	427	82	6.16	9.51	48.728	8.879	0.102803738	0.060240964	0.044392523	0.072289157	0.053738318	0.108433735	0.021028037	0.012048193	0.058411215	0.036144578	0.004672897	0	0.039719626	0.084337349	0.028037383	0.036144578	0.077102804	0.036144578	0.063084112	0.084337349	0.037383178	0.048192771	0.051401869	0.072289157	0.039719626	0.024096386	0.014018692	0.060240964	0.03271028	0.012048193	0.011682243	0.036144578	0.11682243
YCL011C_YGR207C	0	0	3	7	1	1	103358	911633	102075	910848	427	261	6.16	8.71	48.728	28.758	0.102803738	0.049618321	0.044392523	0.072519084	0.053738318	0.095419847	0.021028037	0.022900763	0.058411215	0.019083969	0.004672897	0.003816794	0.039719626	0.118320611	0.028037383	0.034351145	0.077102804	0.080152672	0.063084112	0.053435115	0.037383178	0.049618321	0.051401869	0.083969466	0.039719626	0.099236641	0.014018692	0.011450382	0.03271028	0.003816794	0.011682243	0.003816794	0.11682243
YCL011C_YNL168C	0	0	3	14	1	1	103358	318811	102075	318032	427	259	6.16	8.85	48.728	28.792	0.102803738	0.065384615	0.044392523	0.046153846	0.053738318	0.092307692	0.021028037	0.023076923	0.058411215	0.042307692	0.004672897	0.003846154	0.039719626	0.073076923	0.028037383	0.026923077	0.077102804	0.057692308	0.063084112	0.080769231	0.037383178	0.065384615	0.051401869	0.057692308	0.039719626	0.076923077	0.014018692	0.015384615	0.03271028	0.023076923	0.011682243	0.030769231	0.11682243
YCL011C_YER168C	0	0	3	5	1	1	103358	522664	102075	521024	427	546	6.16	8.34	48.728	62.484	0.102803738	0.045703839	0.044392523	0.054844607	0.053738318	0.118829982	0.021028037	0.021937843	0.058411215	0.0511883	0.004672897	0.009140768	0.039719626	0.085923218	0.028037383	0.040219378	0.077102804	0.067641682	0.063084112	0.053016453	0.037383178	0.045703839	0.051401869	0.047531993	0.039719626	0.074954296	0.014018692	0.009140768	0.03271028	0.027422303	0.011682243	0.02559415	0.11682243
YCL011C_YLR328W	0	0	3	12	1	0	103358	784913	102075	786118	427	401	6.16	6.89	48.728	45.859	0.102803738	0.047263682	0.044392523	0.052238806	0.053738318	0.084577114	0.021028037	0.02238806	0.058411215	0.027363184	0.004672897	0.007462687	0.039719626	0.062189055	0.028037383	0.037313433	0.077102804	0.069651741	0.063084112	0.082089552	0.037383178	0.064676617	0.051401869	0.059701493	0.039719626	0.074626866	0.014018692	0.009950249	0.03271028	0.039800995	0.011682243	0.052238806	0.11682243
YCL011C_YJR044C	0	0	3	10	1	1	103358	519177	102075	518755	427	140	6.16	6.32	48.728	15.663	0.102803738	0.070921986	0.044392523	0.042553191	0.053738318	0.141843972	0.021028037	0.042553191	0.058411215	0.106382979	0.004672897	0.007092199	0.039719626	0.042553191	0.028037383	0.014184397	0.077102804	0.014184397	0.063084112	0.092198582	0.037383178	0.035460993	0.051401869	0.042553191	0.039719626	0.106382979	0.014018692	0.028368794	0.03271028	0.035460993	0.011682243	0.035460993	0.11682243
YCL011C_YER118C	0	0	3	5	1	1	103358	399051	102075	397948	427	367	6.16	5.44	48.728	41.125	0.102803738	0.057065217	0.044392523	0.078804348	0.053738318	0.057065217	0.021028037	0.016304348	0.058411215	0.046195652	0.004672897	0.019021739	0.039719626	0.032608696	0.028037383	0.035326087	0.077102804	0.035326087	0.063084112	0.100543478	0.037383178	0.043478261	0.051401869	0.035326087	0.039719626	0.089673913	0.014018692	0.005434783	0.03271028	0.051630435	0.011682243	0.016304348	0.11682243
YCL011C_YJR088C	0	0	3	10	1	1	103358	587365	102075	586487	427	292	6.16	5.44	48.728	33.855	0.102803738	0.030716724	0.044392523	0.064846416	0.053738318	0.150170648	0.021028037	0.030716724	0.058411215	0.034129693	0.004672897	0.010238908	0.039719626	0.098976109	0.028037383	0.037542662	0.077102804	0.092150171	0.063084112	0.058020478	0.037383178	0.010238908	0.051401869	0.051194539	0.039719626	0.058020478	0.014018692	0.013651877	0.03271028	0.058020478	0.011682243	0	0.11682243
YCL011C_YEL063C	0	0	3	5	1	1	103358	33466	102075	31694	427	590	6.16	8.58	48.728	65.785	0.102803738	0.082910321	0.044392523	0.084602369	0.053738318	0.077834179	0.021028037	0.021996616	0.058411215	0.084602369	0.004672897	0.027072758	0.039719626	0.049069374	0.028037383	0.020304569	0.077102804	0.047377327	0.063084112	0.069373942	0.037383178	0.042301184	0.051401869	0.069373942	0.039719626	0.096446701	0.014018692	0.008460237	0.03271028	0.035532995	0.011682243	0.013536379	0.11682243
YCL011C_YER004W	0	0	3	5	1	0	103358	159579	102075	160274	427	231	6.16	10.03	48.728	25.086	0.102803738	0.099137931	0.044392523	0.094827586	0.053738318	0.112068966	0.021028037	0.017241379	0.058411215	0.038793103	0.004672897	0.004310345	0.039719626	0.068965517	0.028037383	0.043103448	0.077102804	0.047413793	0.063084112	0.060344828	0.037383178	0.034482759	0.051401869	0.068965517	0.039719626	0.056034483	0.014018692	0.00862069	0.03271028	0.025862069	0.011682243	0.021551724	0.11682243
YCL011C_YJL140W	0	0	3	10	1	0	103358	150957	102075	151622	427	221	6.16	4.66	48.728	25.414	0.102803738	0.031531532	0.044392523	0.063063063	0.053738318	0.126126126	0.021028037	0.013513514	0.058411215	0.031531532	0.004672897	0	0.039719626	0.081081081	0.028037383	0.054054054	0.077102804	0.130630631	0.063084112	0.054054054	0.037383178	0.009009009	0.051401869	0.045045045	0.039719626	0.036036036	0.014018692	0.004504505	0.03271028	0.009009009	0.011682243	0.027027027	0.11682243
YCL011C_YBR082C	0	0	3	2	1	1	103358	407163	102075	406622	427	148	6.16	6.5	48.728	16.456	0.102803738	0.040268456	0.044392523	0.080536913	0.053738318	0.087248322	0.021028037	0.013422819	0.058411215	0.033557047	0.004672897	0.020134228	0.039719626	0.073825503	0.028037383	0.013422819	0.077102804	0.033557047	0.063084112	0.093959732	0.037383178	0.100671141	0.051401869	0.033557047	0.039719626	0.073825503	0.014018692	0.020134228	0.03271028	0.046979866	0.011682243	0.026845638	0.11682243
YCL011C_YIL135C	0	0	3	9	1	1	103358	96375	102075	95065	427	436	6.16	10.01	48.728	47.961	0.102803738	0.034324943	0.044392523	0.057208238	0.053738318	0.061784897	0.021028037	0.029748284	0.058411215	0.029748284	0.004672897	0	0.039719626	0.029748284	0.028037383	0.041189931	0.077102804	0.029748284	0.063084112	0.176201373	0.037383178	0.073226545	0.051401869	0.027459954	0.039719626	0.032036613	0.014018692	0.00228833	0.03271028	0.025171625	0.011682243	0.034324943	0.11682243
YCL011C_YAL032C	0	0	3	1	1	1	103358	84475	102075	83336	427	379	6.16	9.93	48.728	42.482	0.102803738	0.042105263	0.044392523	0.092105263	0.053738318	0.076315789	0.021028037	0.018421053	0.058411215	0.023684211	0.004672897	0.005263158	0.039719626	0.089473684	0.028037383	0.05	0.077102804	0.076315789	0.063084112	0.081578947	0.037383178	0.052631579	0.051401869	0.063157895	0.039719626	0.039473684	0.014018692	0.002631579	0.03271028	0.026315789	0.011682243	0.021052632	0.11682243
YCL011C_YKL063C	0	0	3	11	1	1	103358	321162	102075	320659	427	167	6.16	10.2	48.728	19.003	0.102803738	0.041666667	0.044392523	0.071428571	0.053738318	0.077380952	0.021028037	0.011904762	0.058411215	0.011904762	0.004672897	0	0.039719626	0.148809524	0.028037383	0.083333333	0.077102804	0.071428571	0.063084112	0.05952381	0.037383178	0.029761905	0.051401869	0.047619048	0.039719626	0.06547619	0.014018692	0.005952381	0.03271028	0.035714286	0.011682243	0.011904762	0.11682243
YCL011C_YNL157W	0	0	3	14	1	0	103358	340354	102075	340860	427	168	6.16	10.2	48.728	18.051	0.102803738	0.082840237	0.044392523	0.029585799	0.053738318	0.065088757	0.021028037	0.023668639	0.058411215	0.017751479	0.004672897	0	0.039719626	0.088757396	0.028037383	0.023668639	0.077102804	0.035502959	0.063084112	0.165680473	0.037383178	0.071005917	0.051401869	0.017751479	0.039719626	0.065088757	0.014018692	0.00591716	0.03271028	0.035502959	0.011682243	0.01183432	0.11682243
YCL011C_YGL014W	0	0	3	7	1	0	103358	466146	102075	468812	427	888	6.16	6.59	48.728	97.797	0.102803738	0.050618673	0.044392523	0.057367829	0.053738318	0.085489314	0.021028037	0.029246344	0.058411215	0.035995501	0.004672897	0.002249719	0.039719626	0.058492688	0.028037383	0.048368954	0.077102804	0.042744657	0.063084112	0.096737908	0.037383178	0.085489314	0.051401869	0.042744657	0.039719626	0.058492688	0.014018692	0.012373453	0.03271028	0.025871766	0.011682243	0.032620922	0.11682243
YCL011C_YJL001W	0	0	3	10	1	0	103358	435156	102075	435919	427	215	6.16	5.73	48.728	23.547	0.102803738	0.092592593	0.044392523	0.078703704	0.053738318	0.064814815	0.021028037	0.018518519	0.058411215	0.027777778	0.004672897	0.009259259	0.039719626	0.064814815	0.028037383	0.027777778	0.077102804	0.055555556	0.063084112	0.074074074	0.037383178	0.018518519	0.051401869	0.074074074	0.039719626	0.078703704	0.014018692	0.018518519	0.03271028	0.055555556	0.011682243	0.018518519	0.11682243
YCL011C_YGL092W	0	0	3	7	1	0	103358	337909	102075	341862	427	1317	6.16	5.51	48.728	145.66	0.102803738	0.063732929	0.044392523	0.054628225	0.053738318	0.101669196	0.021028037	0.014415781	0.058411215	0.051593323	0.004672897	0.008345979	0.039719626	0.069044006	0.028037383	0.040212443	0.077102804	0.063732929	0.063084112	0.116843703	0.037383178	0.04400607	0.051401869	0.042488619	0.039719626	0.051593323	0.014018692	0.010622155	0.03271028	0.026555387	0.011682243	0.009104704	0.11682243
YCL011C_YJR117W	0	0	3	10	1	0	103358	641997	102075	643358	427	453	6.16	8.04	48.728	52.324	0.102803738	0.033039648	0.044392523	0.046255507	0.053738318	0.127753304	0.021028037	0.028634361	0.058411215	0.09030837	0.004672897	0.011013216	0.039719626	0.068281938	0.028037383	0.028634361	0.077102804	0.039647577	0.063084112	0.085903084	0.037383178	0.04185022	0.051401869	0.059471366	0.039719626	0.079295154	0.014018692	0.00660793	0.03271028	0.046255507	0.011682243	0.028634361	0.11682243
YCL011C_YBR158W	0	0	3	2	1	0	103358	556543	102075	558192	427	549	6.16	9.67	48.728	62.686	0.102803738	0.030909091	0.044392523	0.047272727	0.053738318	0.118181818	0.021028037	0.018181818	0.058411215	0.04	0.004672897	0.014545455	0.039719626	0.078181818	0.028037383	0.036363636	0.077102804	0.063636364	0.063084112	0.090909091	0.037383178	0.054545455	0.051401869	0.065454545	0.039719626	0.056363636	0.014018692	0.021818182	0.03271028	0.016363636	0.011682243	0.027272727	0.11682243
YCL011C_YER143W	0	0	3	5	1	0	103358	456314	102075	457600	427	428	6.16	4.8	48.728	47.354	0.102803738	0.062937063	0.044392523	0.072261072	0.053738318	0.118881119	0.021028037	0.03030303	0.058411215	0.034965035	0.004672897	0	0.039719626	0.048951049	0.028037383	0.055944056	0.077102804	0.058275058	0.063084112	0.048951049	0.037383178	0.060606061	0.051401869	0.037296037	0.039719626	0.074592075	0.014018692	0.006993007	0.03271028	0.023310023	0.011682243	0.006993007	0.11682243
YCL011C_YJL079C	0	0	3	10	1	1	103358	290768	102075	289869	427	299	6.16	4.3	48.728	30.634	0.102803738	0.06	0.044392523	0.15	0.053738318	0.07	0.021028037	0.003333333	0.058411215	0.013333333	0.004672897	0.016666667	0.039719626	0.03	0.028037383	0.026666667	0.077102804	0.036666667	0.063084112	0.143333333	0.037383178	0.046666667	0.051401869	0.07	0.039719626	0.013333333	0.014018692	0.013333333	0.03271028	0.043333333	0.011682243	0.02	0.11682243
YCL011C_YBR086C	0	0	3	2	1	1	103358	423035	102075	420195	427	946	6.16	9.73	48.728	105.853	0.102803738	0.032734952	0.044392523	0.066525871	0.053738318	0.090813094	0.021028037	0.010559662	0.058411215	0.058078141	0.004672897	0.011615628	0.039719626	0.085533263	0.028037383	0.034846885	0.077102804	0.045406547	0.063084112	0.114044351	0.037383178	0.050686378	0.051401869	0.060190074	0.039719626	0.071805702	0.014018692	0.00844773	0.03271028	0.034846885	0.011682243	0.028511088	0.11682243
YCL011C_YLL036C	0	0	3	12	1	1	103358	68255	102075	66744	427	503	6.16	4.87	48.728	56.569	0.102803738	0.041666667	0.044392523	0.061507937	0.053738318	0.099206349	0.021028037	0.01984127	0.058411215	0.029761905	0.004672897	0.011904762	0.039719626	0.075396825	0.028037383	0.035714286	0.077102804	0.06547619	0.063084112	0.087301587	0.037383178	0.043650794	0.051401869	0.055555556	0.039719626	0.063492063	0.014018692	0.017857143	0.03271028	0.043650794	0.011682243	0.009920635	0.11682243
YCL011C_YOL027C	0	0	3	15	1	1	103358	273725	102075	272004	427	573	6.16	7.94	48.728	65.005	0.102803738	0.026132404	0.044392523	0.083623693	0.053738318	0.097560976	0.021028037	0.019163763	0.058411215	0.041811847	0.004672897	0.003484321	0.039719626	0.113240418	0.028037383	0.036585366	0.077102804	0.104529617	0.063084112	0.081881533	0.037383178	0.050522648	0.051401869	0.054006969	0.039719626	0.048780488	0.014018692	0.005226481	0.03271028	0.031358885	0.011682243	0.010452962	0.11682243
YCL011C_YOR234C	0	0	3	15	1	1	103358	779406	102075	778556	427	107	6.16	11.76	48.728	12.168	0.102803738	0.074074074	0.044392523	0.074074074	0.053738318	0.055555556	0.021028037	0.018518519	0.058411215	0.037037037	0.004672897	0.009259259	0.039719626	0.083333333	0.028037383	0.027777778	0.077102804	0.037037037	0.063084112	0.083333333	0.037383178	0.037037037	0.051401869	0.101851852	0.039719626	0.055555556	0.014018692	0	0.03271028	0.055555556	0.011682243	0.027777778	0.11682243
YCL011C_YDL123W	0	0	3	4	1	0	103358	241418	102075	241840	427	140	6.16	6.45	48.728	15.673	0.102803738	0.042553191	0.044392523	0.056737589	0.053738318	0.106382979	0.021028037	0.014184397	0.058411215	0.04964539	0.004672897	0.007092199	0.039719626	0.007092199	0.028037383	0.063829787	0.077102804	0.028368794	0.063084112	0.092198582	0.037383178	0.113475177	0.051401869	0.085106383	0.039719626	0.028368794	0.014018692	0.042553191	0.03271028	0.070921986	0.011682243	0.014184397	0.11682243
YCL011C_YBR210W	0	0	3	2	1	0	103358	645545	102075	645973	427	142	6.16	8.04	48.728	16.347	0.102803738	0.048951049	0.044392523	0.062937063	0.053738318	0.174825175	0.021028037	0.013986014	0.058411215	0.097902098	0.004672897	0.006993007	0.039719626	0.048951049	0.028037383	0.013986014	0.077102804	0.034965035	0.063084112	0.055944056	0.037383178	0.013986014	0.051401869	0.055944056	0.039719626	0.083916084	0.014018692	0.034965035	0.03271028	0.062937063	0.011682243	0.006993007	0.11682243
YCL011C_YOR292C	0	0	3	15	1	1	103358	866581	102075	865652	427	309	6.16	5.84	48.728	36.195	0.102803738	0.04516129	0.044392523	0.041935484	0.053738318	0.096774194	0.021028037	0.029032258	0.058411215	0.096774194	0.004672897	0.029032258	0.039719626	0.025806452	0.028037383	0.048387097	0.077102804	0.025806452	0.063084112	0.080645161	0.037383178	0.035483871	0.051401869	0.061290323	0.039719626	0.05483871	0.014018692	0.019354839	0.03271028	0.048387097	0.011682243	0.025806452	0.11682243
YCL011C_YJR057W	0	0	3	10	1	0	103358	544054	102075	544704	427	216	6.16	5.49	48.728	24.687	0.102803738	0.069124424	0.044392523	0.032258065	0.053738318	0.115207373	0.021028037	0.023041475	0.058411215	0.046082949	0.004672897	0.013824885	0.039719626	0.096774194	0.028037383	0.046082949	0.077102804	0.064516129	0.063084112	0.050691244	0.037383178	0.023041475	0.051401869	0.059907834	0.039719626	0.073732719	0.014018692	0.013824885	0.03271028	0.02764977	0.011682243	0.013824885	0.11682243
YCL011C_YPL058C	0	0	3	16	1	1	103358	450374	102075	445839	427	1511	6.16	6.82	48.728	171.064	0.102803738	0.062830688	0.044392523	0.076058201	0.053738318	0.08994709	0.021028037	0.031084656	0.058411215	0.054232804	0.004672897	0.017857143	0.039719626	0.050925926	0.028037383	0.03505291	0.077102804	0.060185185	0.063084112	0.076719577	0.037383178	0.034391534	0.051401869	0.076058201	0.039719626	0.052248677	0.014018692	0.020502646	0.03271028	0.050925926	0.011682243	0.023809524	0.11682243
YCL011C_YCR047C	0	0	3	3	1	1	103358	211541	102075	210714	427	275	6.16	9.69	48.728	30.742	0.102803738	0.086956522	0.044392523	0.065217391	0.053738318	0.105072464	0.021028037	0.028985507	0.058411215	0.043478261	0.004672897	0.007246377	0.039719626	0.09057971	0.028037383	0.050724638	0.077102804	0.057971014	0.063084112	0.076086957	0.037383178	0.039855072	0.051401869	0.043478261	0.039719626	0.043478261	0.014018692	0.014492754	0.03271028	0.025362319	0.011682243	0.014492754	0.11682243
YCL011C_YML092C	0	0	3	13	1	1	103358	86739	102075	85987	427	250	6.16	5.5	48.728	27.162	0.102803738	0.091633466	0.044392523	0.071713147	0.053738318	0.103585657	0.021028037	0.015936255	0.058411215	0.035856574	0.004672897	0.007968127	0.039719626	0.071713147	0.028037383	0.023904382	0.077102804	0.067729084	0.063084112	0.091633466	0.037383178	0.047808765	0.051401869	0.06374502	0.039719626	0.059760956	0.014018692	0	0.03271028	0.039840637	0.011682243	0.011952191	0.11682243
YCL011C_YNL239W	0	0	3	14	1	0	103358	200570	102075	201934	427	454	6.16	7.97	48.728	52.088	0.102803738	0.03956044	0.044392523	0.052747253	0.053738318	0.116483516	0.021028037	0.024175824	0.058411215	0.041758242	0.004672897	0.015384615	0.039719626	0.083516484	0.028037383	0.043956044	0.077102804	0.054945055	0.063084112	0.076923077	0.037383178	0.043956044	0.051401869	0.057142857	0.039719626	0.052747253	0.014018692	0.006593407	0.03271028	0.043956044	0.011682243	0.015384615	0.11682243
YCL011C_YOR008C	0	0	3	15	1	1	103358	342415	102075	341279	427	378	6.16	4.52	48.728	39.27	0.102803738	0.068601583	0.044392523	0.071240106	0.053738318	0.042216359	0.021028037	0.013192612	0.058411215	0.026385224	0.004672897	0.002638522	0.039719626	0.034300792	0.028037383	0.031662269	0.077102804	0.050131926	0.063084112	0.229551451	0.037383178	0.026385224	0.051401869	0.044854881	0.039719626	0.042216359	0.014018692	0.023746702	0.03271028	0.036939314	0.011682243	0.018469657	0.11682243
YCL011C_YGL012W	0	0	3	7	1	0	103358	472860	102075	474281	427	473	6.16	8.77	48.728	56.039	0.102803738	0.063291139	0.044392523	0.050632911	0.053738318	0.109704641	0.021028037	0.03164557	0.058411215	0.082278481	0.004672897	0.042194093	0.039719626	0.063291139	0.028037383	0.03164557	0.077102804	0.035864979	0.063084112	0.033755274	0.037383178	0.048523207	0.051401869	0.056962025	0.039719626	0.05907173	0.014018692	0.025316456	0.03271028	0.080168776	0.011682243	0.03164557	0.11682243
YCL011C_YIL138C	0	0	3	9	1	1	103358	89715	102075	89230	427	161	6.16	4.31	48.728	19.093	0.102803738	0.00617284	0.044392523	0.049382716	0.053738318	0.12962963	0.021028037	0.018518519	0.058411215	0.00617284	0.004672897	0.012345679	0.039719626	0.12962963	0.028037383	0.074074074	0.077102804	0.228395062	0.063084112	0.092592593	0.037383178	0	0.051401869	0.012345679	0.039719626	0.024691358	0.014018692	0.00617284	0.03271028	0.018518519	0.011682243	0	0.11682243
YCL011C_YHR058C	0	0	3	8	1	1	103358	219886	102075	218999	427	295	6.16	5.05	48.728	32.819	0.102803738	0.077702703	0.044392523	0.043918919	0.053738318	0.067567568	0.021028037	0.047297297	0.058411215	0.033783784	0.004672897	0.010135135	0.039719626	0.040540541	0.028037383	0.054054054	0.077102804	0.054054054	0.063084112	0.074324324	0.037383178	0.054054054	0.051401869	0.060810811	0.039719626	0.057432432	0.014018692	0	0.03271028	0.040540541	0.011682243	0.006756757	0.11682243
YCL011C_YDR349C	0	0	3	4	1	1	103358	1174171	102075	1172381	427	596	6.16	4.63	48.728	64.498	0.102803738	0.063651591	0.044392523	0.060301508	0.053738318	0.093802345	0.021028037	0.018425461	0.058411215	0.041876047	0.004672897	0.008375209	0.039719626	0.030150754	0.028037383	0.028475712	0.077102804	0.035175879	0.063084112	0.150753769	0.037383178	0.040201005	0.051401869	0.061976549	0.039719626	0.067001675	0.014018692	0.008375209	0.03271028	0.048576214	0.011682243	0.006700168	0.11682243
YCL011C_YKL216W	0	0	3	11	1	0	103358	25216	102075	26160	427	314	6.16	5.92	48.728	34.801	0.102803738	0.082539683	0.044392523	0.063492063	0.053738318	0.092063492	0.021028037	0.025396825	0.058411215	0.063492063	0.004672897	0	0.039719626	0.079365079	0.028037383	0.022222222	0.077102804	0.076190476	0.063084112	0.06031746	0.037383178	0.053968254	0.051401869	0.053968254	0.039719626	0.073015873	0.014018692	0.00952381	0.03271028	0.038095238	0.011682243	0.00952381	0.11682243
YCL011C_YOR052C	0	0	3	15	1	1	103358	427226	102075	426774	427	150	6.16	9.85	48.728	16.734	0.102803738	0.039735099	0.044392523	0.059602649	0.053738318	0.039735099	0.021028037	0.01986755	0.058411215	0.026490066	0.004672897	0	0.039719626	0.132450331	0.028037383	0.039735099	0.077102804	0.059602649	0.063084112	0.125827815	0.037383178	0.033112583	0.051401869	0.026490066	0.039719626	0.066225166	0.014018692	0.046357616	0.03271028	0.013245033	0.011682243	0.039735099	0.11682243
YCL011C_YOR164C	0	0	3	15	1	1	103358	644333	102075	643395	427	312	6.16	4.92	48.728	36.28	0.102803738	0.047923323	0.044392523	0.057507987	0.053738318	0.115015974	0.021028037	0.019169329	0.058411215	0.076677316	0.004672897	0.009584665	0.039719626	0.076677316	0.028037383	0.038338658	0.077102804	0.076677316	0.063084112	0.073482428	0.037383178	0.019169329	0.051401869	0.051118211	0.039719626	0.063897764	0.014018692	0.006389776	0.03271028	0.060702875	0.011682243	0.022364217	0.11682243
YCL011C_YER120W	0	0	3	5	1	0	103358	401131	102075	401865	427	244	6.16	4.67	48.728	26.925	0.102803738	0.020408163	0.044392523	0.085714286	0.053738318	0.057142857	0.021028037	0.008163265	0.058411215	0.032653061	0.004672897	0.008163265	0.039719626	0.081632653	0.028037383	0.065306122	0.077102804	0.097959184	0.063084112	0.069387755	0.037383178	0.093877551	0.051401869	0.12244898	0.039719626	0.057142857	0.014018692	0.008163265	0.03271028	0.024489796	0.011682243	0.008163265	0.11682243
YCL011C_YDL126C	0	0	3	4	1	1	103358	238664	102075	236157	427	835	6.16	4.66	48.728	91.995	0.102803738	0.070574163	0.044392523	0.096889952	0.053738318	0.082535885	0.021028037	0.027511962	0.058411215	0.033492823	0.004672897	0.003588517	0.039719626	0.05861244	0.028037383	0.023923445	0.077102804	0.087320574	0.063084112	0.04784689	0.037383178	0.049043062	0.051401869	0.076555024	0.039719626	0.061004785	0.014018692	0.004784689	0.03271028	0.0215311	0.011682243	0.013157895	0.11682243
YCL011C_YAL023C	0	0	3	1	1	1	103358	108552	102075	106273	427	759	6.16	7.68	48.728	86.869	0.102803738	0.065789474	0.044392523	0.059210526	0.053738318	0.103947368	0.021028037	0.031578947	0.058411215	0.067105263	0.004672897	0.035526316	0.039719626	0.044736842	0.028037383	0.028947368	0.077102804	0.039473684	0.063084112	0.088157895	0.037383178	0.046052632	0.051401869	0.061842105	0.039719626	0.051315789	0.014018692	0.014473684	0.03271028	0.044736842	0.011682243	0.027631579	0.11682243
YCL011C_YFR050C	0	0	3	6	1	1	103358	249853	102075	249053	427	266	6.16	5.81	48.728	29.443	0.102803738	0.071161049	0.044392523	0.086142322	0.053738318	0.078651685	0.021028037	0.033707865	0.058411215	0.029962547	0.004672897	0.011235955	0.039719626	0.04494382	0.028037383	0.037453184	0.077102804	0.041198502	0.063084112	0.06741573	0.037383178	0.041198502	0.051401869	0.078651685	0.039719626	0.06741573	0.014018692	0	0.03271028	0.048689139	0.011682243	0.011235955	0.11682243
YCL011C_YER070W	0	0	3	5	1	0	103358	298948	102075	301614	427	888	6.16	6.12	48.728	99.56	0.102803738	0.05624297	0.044392523	0.086614173	0.053738318	0.077615298	0.021028037	0.030371204	0.058411215	0.034870641	0.004672897	0.011248594	0.039719626	0.059617548	0.028037383	0.035995501	0.077102804	0.065241845	0.063084112	0.071991001	0.037383178	0.048368954	0.051401869	0.053993251	0.039719626	0.066366704	0.014018692	0.015748031	0.03271028	0.048368954	0.011682243	0.01912261	0.11682243
YCL011C_YNL036W	0	0	3	14	1	0	103358	559815	102075	560480	427	221	6.16	6.99	48.728	24.859	0.102803738	0.045045045	0.044392523	0.04954955	0.053738318	0.103603604	0.021028037	0.013513514	0.058411215	0.027027027	0.004672897	0.009009009	0.039719626	0.063063063	0.028037383	0.054054054	0.077102804	0.054054054	0.063084112	0.072072072	0.037383178	0.031531532	0.051401869	0.058558559	0.039719626	0.063063063	0.014018692	0.040540541	0.03271028	0.036036036	0.011682243	0.045045045	0.11682243
YCL011C_YPL075W	0	0	3	16	1	0	103358	412251	102075	415359	427	785	6.16	8.5	48.728	87.728	0.102803738	0.041984733	0.044392523	0.03562341	0.053738318	0.092875318	0.021028037	0.012722646	0.058411215	0.041984733	0.004672897	0.008905852	0.039719626	0.069974555	0.028037383	0.047073791	0.077102804	0.055979644	0.063084112	0.128498728	0.037383178	0.071246819	0.051401869	0.044529262	0.039719626	0.066157761	0.014018692	0.008905852	0.03271028	0.025445293	0.011682243	0.011450382	0.11682243
YCL011C_YCR017C	0	0	3	3	1	1	103358	147632	102075	144771	427	953	6.16	6.22	48.728	107.882	0.102803738	0.06918239	0.044392523	0.066037736	0.053738318	0.112159329	0.021028037	0.025157233	0.058411215	0.068134172	0.004672897	0.024109015	0.039719626	0.035639413	0.028037383	0.026205451	0.077102804	0.042976939	0.063084112	0.073375262	0.037383178	0.042976939	0.051401869	0.067085954	0.039719626	0.076519916	0.014018692	0.009433962	0.03271028	0.056603774	0.011682243	0.026205451	0.11682243
YCL011C_YGL112C	0	0	3	7	1	1	103358	299731	102075	298181	427	516	6.16	5.17	48.728	57.901	0.102803738	0.044487427	0.044392523	0.056092843	0.053738318	0.127659574	0.021028037	0.00967118	0.058411215	0.040618956	0.004672897	0.005802708	0.039719626	0.065764023	0.028037383	0.048355899	0.077102804	0.065764023	0.063084112	0.075435203	0.037383178	0.042553191	0.051401869	0.073500967	0.039719626	0.061895551	0.014018692	0.003868472	0.03271028	0.030947776	0.011682243	0.01934236	0.11682243
YCL011C_YBL026W	0	0	3	2	1	0	103358	170626	102075	171041	427	95	6.16	8.4	48.728	11.163	0.102803738	0.03125	0.044392523	0.010416667	0.053738318	0.114583333	0.021028037	0.03125	0.058411215	0.0625	0.004672897	0	0.039719626	0.083333333	0.028037383	0.041666667	0.077102804	0.0625	0.063084112	0.052083333	0.037383178	0.010416667	0.051401869	0.104166667	0.039719626	0.052083333	0.014018692	0.010416667	0.03271028	0.03125	0.011682243	0.010416667	0.11682243
YCL011C_YDR367W	0	0	3	4	1	0	103358	1212841	102075	1213607	427	221	6.16	8.06	48.728	25.484	0.102803738	0.045045045	0.044392523	0.040540541	0.053738318	0.153153153	0.021028037	0.018018018	0.058411215	0.072072072	0.004672897	0.027027027	0.039719626	0.058558559	0.028037383	0.040540541	0.077102804	0.036036036	0.063084112	0.076576577	0.037383178	0.031531532	0.051401869	0.045045045	0.039719626	0.085585586	0.014018692	0.022522523	0.03271028	0.045045045	0.011682243	0.018018018	0.11682243
YCL011C_YDR144C	0	0	3	4	1	1	103358	746099	102075	744309	427	596	6.16	4.4	48.728	64.269	0.102803738	0.068676717	0.044392523	0.056951424	0.053738318	0.077051926	0.021028037	0.020100503	0.058411215	0.048576214	0.004672897	0.006700168	0.039719626	0.046901173	0.028037383	0.028475712	0.077102804	0.038525963	0.063084112	0.147403685	0.037383178	0.030150754	0.051401869	0.060301508	0.039719626	0.058626466	0.014018692	0.008375209	0.03271028	0.045226131	0.011682243	0.013400335	0.11682243
YCL011C_YBL040C	0	0	3	2	1	1	103358	142871	102075	142115	427	219	6.16	10.62	48.728	25.762	0.102803738	0.045454545	0.044392523	0.05	0.053738318	0.15	0.021028037	0.031818182	0.058411215	0.081818182	0.004672897	0.022727273	0.039719626	0.068181818	0.028037383	0.022727273	0.077102804	0.022727273	0.063084112	0.068181818	0.037383178	0.018181818	0.051401869	0.045454545	0.039719626	0.095454545	0.014018692	0	0.03271028	0.068181818	0.011682243	0.036363636	0.11682243
YCL011C_YML027W	0	0	3	13	1	0	103358	221406	102075	222563	427	385	6.16	11.1	48.728	42.739	0.102803738	0.018134715	0.044392523	0.056994819	0.053738318	0.085492228	0.021028037	0.010362694	0.058411215	0.028497409	0.004672897	0.002590674	0.039719626	0.088082902	0.028037383	0.041450777	0.077102804	0.046632124	0.063084112	0.165803109	0.037383178	0.088082902	0.051401869	0.03626943	0.039719626	0.051813472	0.014018692	0.007772021	0.03271028	0.005181347	0.011682243	0.031088083	0.11682243
YLR175W_YBR214W	0	0	12	2	0	0	506136	651410	507587	652993	483	527	9.5	9.45	54.704	57.187	0.059917355	0.041666667	0.055785124	0.068181818	0.090909091	0.096590909	0.020661157	0.024621212	0.010330579	0.024621212	0.012396694	0.005681818	0.134297521	0.053030303	0.026859504	0.045454545	0.099173554	0.045454545	0.074380165	0.128787879	0.035123967	0.083333333	0.07231405	0.060606061	0.047520661	0.058712121	0.018595041	0.011363636	0.02892562	0.017045455	0.016528926	0.026515152	0.055785124
YLR175W_YEL017W	0	0	12	5	0	0	506136	123657	507587	124670	483	337	9.5	4.7	54.704	38.234	0.059917355	0.032544379	0.055785124	0.053254438	0.090909091	0.115384615	0.020661157	0.017751479	0.010330579	0.068047337	0.012396694	0.00887574	0.134297521	0.062130178	0.026859504	0.029585799	0.099173554	0.047337278	0.074380165	0.115384615	0.035123967	0.032544379	0.07231405	0.038461538	0.047520661	0.047337278	0.018595041	0.017751479	0.02892562	0.044378698	0.016528926	0.01183432	0.055785124
YLR175W_YBR129C	0	0	12	2	0	1	506136	495333	507587	494347	483	328	9.5	8.22	54.704	37.739	0.059917355	0.042553191	0.055785124	0.054711246	0.090909091	0.075987842	0.020661157	0.021276596	0.010330579	0.048632219	0.012396694	0.018237082	0.134297521	0.103343465	0.026859504	0.03343465	0.099173554	0.060790274	0.074380165	0.088145897	0.035123967	0.03343465	0.07231405	0.03343465	0.047520661	0.069908815	0.018595041	0.012158055	0.02892562	0.027355623	0.016528926	0.039513678	0.055785124
YLR175W_YGR014W	0	0	12	7	0	0	506136	516947	507587	520867	483	1306	9.5	3.9	54.704	133.113	0.059917355	0.037490436	0.055785124	0.078806427	0.090909091	0.052792655	0.020661157	0.013006886	0.010330579	0.030604438	0.012396694	0.004590666	0.134297521	0.012241775	0.026859504	0.052027544	0.099173554	0.033664881	0.074380165	0.289977047	0.035123967	0.045906656	0.07231405	0.068859985	0.047520661	0.04055088	0.018595041	0.001530222	0.02892562	0.025248661	0.016528926	0.006120888	0.055785124
YLR175W_YMR260C	0	0	12	13	0	1	506136	789838	507587	789377	483	153	9.5	4.53	54.704	17.435	0.059917355	0.11038961	0.055785124	0.038961039	0.090909091	0.058441558	0.020661157	0.025974026	0.010330579	0.038961039	0.012396694	0.006493506	0.134297521	0.103896104	0.026859504	0.038961039	0.099173554	0.116883117	0.074380165	0.025974026	0.035123967	0.012987013	0.07231405	0.038961039	0.047520661	0.051948052	0.018595041	0.012987013	0.02892562	0.019480519	0.016528926	0.012987013	0.055785124
YLR175W_YKL007W	0	0	12	11	0	0	506136	428945	507587	429751	483	268	9.5	5.06	54.704	30.699	0.059917355	0.05204461	0.055785124	0.029739777	0.090909091	0.066914498	0.020661157	0.003717472	0.010330579	0.048327138	0.012396694	0.011152416	0.134297521	0.074349442	0.026859504	0.029739777	0.099173554	0.085501859	0.074380165	0.096654275	0.035123967	0.037174721	0.07231405	0.066914498	0.047520661	0.096654275	0.018595041	0.007434944	0.02892562	0.044609665	0.016528926	0.022304833	0.055785124
YLR175W_YNL161W	0	0	12	14	0	0	506136	332599	507587	334869	483	756	9.5	8.01	54.704	86.946	0.059917355	0.060766182	0.055785124	0.050198151	0.090909091	0.07661823	0.020661157	0.029062087	0.010330579	0.035667107	0.012396694	0.010568032	0.134297521	0.047556143	0.026859504	0.125495376	0.099173554	0.055482166	0.074380165	0.087186262	0.035123967	0.048877147	0.07231405	0.033025099	0.047520661	0.047556143	0.018595041	0.005284016	0.02892562	0.050198151	0.016528926	0.029062087	0.055785124
YLR175W_YDR267C	0	0	12	4	0	1	506136	1003499	507587	1002507	483	330	9.5	4.44	54.704	37.274	0.059917355	0.066465257	0.055785124	0.075528701	0.090909091	0.075528701	0.020661157	0.009063444	0.010330579	0.03021148	0.012396694	0.048338369	0.134297521	0.066465257	0.026859504	0.018126888	0.099173554	0.081570997	0.074380165	0.087613293	0.035123967	0.009063444	0.07231405	0.093655589	0.047520661	0.057401813	0.018595041	0.018126888	0.02892562	0.033232628	0.016528926	0.027190332	0.055785124
YLR175W_YEL007W	0	0	12	5	0	0	506136	141891	507587	143891	483	666	9.5	7.18	54.704	72.533	0.059917355	0.050974513	0.055785124	0.065967016	0.090909091	0.046476762	0.020661157	0.019490255	0.010330579	0.023988006	0.012396694	0.002998501	0.134297521	0.037481259	0.026859504	0.049475262	0.099173554	0.029985007	0.074380165	0.11844078	0.035123967	0.077961019	0.07231405	0.034482759	0.047520661	0.053973013	0.018595041	0.00149925	0.02892562	0.052473763	0.016528926	0.026986507	0.055785124
YLR175W_YPR062W	0	0	12	16	0	0	506136	677162	507587	677638	483	158	9.5	5.79	54.704	17.507	0.059917355	0.132075472	0.055785124	0.037735849	0.090909091	0.056603774	0.020661157	0.044025157	0.010330579	0.025157233	0.012396694	0.012578616	0.134297521	0.081761006	0.026859504	0.031446541	0.099173554	0.081761006	0.074380165	0.037735849	0.035123967	0.025157233	0.07231405	0.06918239	0.047520661	0.062893082	0.018595041	0.037735849	0.02892562	0.037735849	0.016528926	0.018867925	0.055785124
YLR175W_YDR091C	0	0	12	4	0	1	506136	628532	507587	626706	483	608	9.5	8.82	54.704	68.34	0.059917355	0.0591133	0.055785124	0.057471264	0.090909091	0.095238095	0.020661157	0.016420361	0.010330579	0.047619048	0.012396694	0.001642036	0.134297521	0.083743842	0.026859504	0.045977011	0.099173554	0.057471264	0.074380165	0.060755337	0.035123967	0.055829228	0.07231405	0.065681445	0.047520661	0.090311987	0.018595041	0.022988506	0.02892562	0.026272578	0.016528926	0.014778325	0.055785124
YLR175W_YKL032C	0	0	12	11	0	1	506136	381501	507587	379708	483	597	9.5	8.45	54.704	67.856	0.059917355	0.036789298	0.055785124	0.06187291	0.090909091	0.075250836	0.020661157	0.016722408	0.010330579	0.02173913	0.012396694	0.006688963	0.134297521	0.045150502	0.026859504	0.20735786	0.099173554	0.040133779	0.074380165	0.088628763	0.035123967	0.073578595	0.07231405	0.025083612	0.047520661	0.030100334	0.018595041	0.001672241	0.02892562	0.033444816	0.016528926	0.030100334	0.055785124
YLR175W_YFR037C	0	0	12	6	0	1	506136	229173	507587	227500	483	557	9.5	5.14	54.704	63.168	0.059917355	0.05734767	0.055785124	0.044802867	0.090909091	0.086021505	0.020661157	0.016129032	0.010330579	0.035842294	0.012396694	0.008960573	0.134297521	0.091397849	0.026859504	0.050179211	0.099173554	0.102150538	0.074380165	0.078853047	0.035123967	0.037634409	0.07231405	0.064516129	0.047520661	0.059139785	0.018595041	0.012544803	0.02892562	0.025089606	0.016528926	0.025089606	0.055785124
YLR175W_YKL003C	0	0	12	11	0	1	506136	437135	507587	436740	483	131	9.5	10.66	54.704	15.021	0.059917355	0.037878788	0.055785124	0.045454545	0.090909091	0.128787879	0.020661157	0.03030303	0.010330579	0.022727273	0.012396694	0	0.134297521	0.098484848	0.026859504	0.037878788	0.099173554	0.053030303	0.074380165	0.098484848	0.035123967	0.03030303	0.07231405	0.068181818	0.047520661	0.098484848	0.018595041	0	0.02892562	0.03030303	0.016528926	0.022727273	0.055785124
YLR175W_YGR019W	0	0	12	7	0	0	506136	525233	507587	526648	483	471	9.5	6.78	54.704	52.946	0.059917355	0.065677966	0.055785124	0.086864407	0.090909091	0.093220339	0.020661157	0.008474576	0.010330579	0.048728814	0.012396694	0.012711864	0.134297521	0.084745763	0.026859504	0.040254237	0.099173554	0.065677966	0.074380165	0.059322034	0.035123967	0.061440678	0.07231405	0.042372881	0.047520661	0.061440678	0.018595041	0.016949153	0.02892562	0.046610169	0.016528926	0.025423729	0.055785124
YLR175W_YDL173W	0	0	12	4	0	0	506136	148192	507587	149079	483	295	9.5	10.3	54.704	31.886	0.059917355	0.091216216	0.055785124	0.064189189	0.090909091	0.040540541	0.020661157	0.016891892	0.010330579	0.037162162	0.012396694	0	0.134297521	0.101351351	0.026859504	0.023648649	0.099173554	0.047297297	0.074380165	0.097972973	0.035123967	0.043918919	0.07231405	0.043918919	0.047520661	0.064189189	0.018595041	0	0.02892562	0.010135135	0.016528926	0.02027027	0.055785124
YLR175W_YCR090C	0	0	12	3	0	1	506136	272860	507587	272312	483	182	9.5	4.59	54.704	20.703	0.059917355	0.032786885	0.055785124	0.043715847	0.090909091	0.092896175	0.020661157	0.027322404	0.010330579	0.06010929	0.012396694	0.010928962	0.134297521	0.098360656	0.026859504	0.016393443	0.099173554	0.092896175	0.074380165	0.109289617	0.035123967	0.021857923	0.07231405	0.054644809	0.047520661	0.049180328	0.018595041	0.043715847	0.02892562	0.027322404	0.016528926	0.010928962	0.055785124
YLR175W_YDL052C	0	0	12	4	0	1	506136	363583	507587	362672	483	303	9.5	10.41	54.704	33.887	0.059917355	0.065789474	0.055785124	0.059210526	0.090909091	0.098684211	0.020661157	0.032894737	0.010330579	0.042763158	0.012396694	0.009868421	0.134297521	0.095394737	0.026859504	0.029605263	0.099173554	0.042763158	0.074380165	0.0625	0.035123967	0.049342105	0.07231405	0.088815789	0.047520661	0.069078947	0.018595041	0.016447368	0.02892562	0.036184211	0.016528926	0.023026316	0.055785124
YLR175W_YLR016C	0	0	12	12	0	1	506136	177415	507587	176801	483	204	9.5	4.97	54.704	23.653	0.059917355	0.063414634	0.055785124	0.024390244	0.090909091	0.092682927	0.020661157	0.034146341	0.010330579	0.029268293	0.012396694	0.004878049	0.134297521	0.058536585	0.026859504	0.019512195	0.099173554	0.073170732	0.074380165	0.063414634	0.035123967	0.03902439	0.07231405	0.058536585	0.047520661	0.063414634	0.018595041	0.019512195	0.02892562	0.053658537	0.016528926	0.024390244	0.055785124
YLR175W_YNL327W	0	0	12	14	0	0	506136	24047	507587	27172	483	1041	9.5	4.52	54.704	108.494	0.059917355	0.040307102	0.055785124	0.074856046	0.090909091	0.06621881	0.020661157	0.00671785	0.010330579	0.026871401	0.012396694	0.002879079	0.134297521	0.030710173	0.026859504	0.030710173	0.099173554	0.03646833	0.074380165	0.207293666	0.035123967	0.035508637	0.07231405	0.065259117	0.047520661	0.065259117	0.018595041	0.004798464	0.02892562	0.03646833	0.016528926	0.011516315	0.055785124
YLR175W_YIL117C	0	0	12	9	0	1	506136	141566	507587	140610	483	318	9.5	7.19	54.704	34.65	0.059917355	0.047021944	0.055785124	0.034482759	0.090909091	0.087774295	0.020661157	0.018808777	0.010330579	0.028213166	0.012396694	0.006269592	0.134297521	0.056426332	0.026859504	0.028213166	0.099173554	0.05015674	0.074380165	0.184952978	0.035123967	0.062695925	0.07231405	0.056426332	0.047520661	0.062695925	0.018595041	0	0.02892562	0.028213166	0.016528926	0.018808777	0.055785124
YLR175W_YOR052C	0	0	12	15	0	1	506136	427226	507587	426774	483	150	9.5	9.85	54.704	16.734	0.059917355	0.039735099	0.055785124	0.059602649	0.090909091	0.039735099	0.020661157	0.01986755	0.010330579	0.026490066	0.012396694	0	0.134297521	0.132450331	0.026859504	0.039735099	0.099173554	0.059602649	0.074380165	0.125827815	0.035123967	0.033112583	0.07231405	0.026490066	0.047520661	0.066225166	0.018595041	0.046357616	0.02892562	0.013245033	0.016528926	0.039735099	0.055785124
YLR175W_YCR027C	0	0	12	3	0	1	506136	167995	507587	167366	483	209	9.5	5.92	54.704	23.338	0.059917355	0.061904762	0.055785124	0.057142857	0.090909091	0.104761905	0.020661157	0.023809524	0.010330579	0.033333333	0.012396694	0.004761905	0.134297521	0.066666667	0.026859504	0.028571429	0.099173554	0.076190476	0.074380165	0.076190476	0.035123967	0.019047619	0.07231405	0.061904762	0.047520661	0.080952381	0.018595041	0.023809524	0.02892562	0.028571429	0.016528926	0.00952381	0.055785124
YLR175W_YBL028C	0	0	12	2	0	1	506136	167841	507587	167521	483	106	9.5	10.97	54.704	12.401	0.059917355	0.037383178	0.055785124	0.065420561	0.090909091	0.074766355	0.020661157	0.028037383	0.010330579	0.028037383	0.012396694	0.009345794	0.134297521	0.205607477	0.026859504	0.046728972	0.099173554	0.074766355	0.074380165	0.093457944	0.035123967	0.009345794	0.07231405	0.037383178	0.047520661	0.028037383	0.018595041	0	0.02892562	0.009345794	0.016528926	0.028037383	0.055785124
YLR175W_YOR221C	0	0	12	15	0	1	506136	757559	507587	756477	483	360	9.5	6.9	54.704	40.707	0.059917355	0.033240997	0.055785124	0.041551247	0.090909091	0.113573407	0.020661157	0.016620499	0.010330579	0.03601108	0.012396694	0.005540166	0.134297521	0.055401662	0.026859504	0.047091413	0.099173554	0.04432133	0.074380165	0.096952909	0.035123967	0.052631579	0.07231405	0.047091413	0.047520661	0.077562327	0.018595041	0.022160665	0.02892562	0.038781163	0.016528926	0.022160665	0.055785124
YLR175W_YPR056W	0	0	12	16	0	0	506136	671123	507587	672139	483	338	9.5	9.04	54.704	37.457	0.059917355	0.044247788	0.055785124	0.067846608	0.090909091	0.085545723	0.020661157	0.017699115	0.010330579	0.038348083	0.012396694	0.002949853	0.134297521	0.088495575	0.026859504	0.029498525	0.099173554	0.064896755	0.074380165	0.097345133	0.035123967	0.044247788	0.07231405	0.076696165	0.047520661	0.08259587	0.018595041	0.026548673	0.02892562	0.029498525	0.016528926	0.014749263	0.055785124
YLR175W_YOR151C	0	0	12	15	0	1	506136	616672	507587	612998	483	1224	9.5	6.5	54.704	138.75	0.059917355	0.067755102	0.055785124	0.065306122	0.090909091	0.086530612	0.020661157	0.032653061	0.010330579	0.040816327	0.012396694	0.005714286	0.134297521	0.060408163	0.026859504	0.039183673	0.099173554	0.075918367	0.074380165	0.06122449	0.035123967	0.043265306	0.07231405	0.049795918	0.047520661	0.074285714	0.018595041	0.013877551	0.02892562	0.03755102	0.016528926	0.026938776	0.055785124
YLR175W_YJL145W	0	0	12	10	0	0	506136	145156	507587	146040	483	294	9.5	8.04	54.704	34.388	0.059917355	0.061016949	0.055785124	0.030508475	0.090909091	0.091525424	0.020661157	0.013559322	0.010330579	0.044067797	0.012396694	0.013559322	0.134297521	0.122033898	0.026859504	0.044067797	0.099173554	0.06440678	0.074380165	0.033898305	0.035123967	0.023728814	0.07231405	0.077966102	0.047520661	0.054237288	0.018595041	0.016949153	0.02892562	0.077966102	0.016528926	0.010169492	0.055785124
YLR175W_YDR441C	0	0	12	4	0	1	506136	1345055	507587	1344510	483	181	9.5	4.68	54.704	19.986	0.059917355	0.082417582	0.055785124	0.076923077	0.090909091	0.104395604	0.020661157	0.010989011	0.010330579	0.087912088	0.012396694	0	0.134297521	0.054945055	0.026859504	0.027472527	0.099173554	0.093406593	0.074380165	0.054945055	0.035123967	0.043956044	0.07231405	0.071428571	0.047520661	0.087912088	0.018595041	0.005494505	0.02892562	0.016483516	0.016528926	0.032967033	0.055785124
YLR175W_YHR052W	0	0	12	8	0	0	506136	210842	507587	211972	483	376	9.5	9.54	54.704	42.529	0.059917355	0.031830239	0.055785124	0.047745358	0.090909091	0.098143236	0.020661157	0.013262599	0.010330579	0.034482759	0.012396694	0.00530504	0.134297521	0.140583554	0.026859504	0.026525199	0.099173554	0.092838196	0.074380165	0.095490716	0.035123967	0.034482759	0.07231405	0.066312997	0.047520661	0.068965517	0.018595041	0.00265252	0.02892562	0.021220159	0.016528926	0.013262599	0.055785124
YLR175W_YPL210C	0	0	12	16	0	1	506136	156211	507587	154289	483	640	9.5	10.21	54.704	73.54	0.059917355	0.042121685	0.055785124	0.04524181	0.090909091	0.131045242	0.020661157	0.012480499	0.010330579	0.040561622	0.012396694	0.007800312	0.134297521	0.118564743	0.026859504	0.059282371	0.099173554	0.060842434	0.074380165	0.07800312	0.035123967	0.021840874	0.07231405	0.053042122	0.047520661	0.060842434	0.018595041	0.010920437	0.02892562	0.031201248	0.016528926	0.017160686	0.055785124
YLR175W_YHR030C	0	0	12	8	0	1	506136	170337	507587	168883	483	484	9.5	5.07	54.704	55.636	0.059917355	0.049484536	0.055785124	0.059793814	0.090909091	0.098969072	0.020661157	0.024742268	0.010330579	0.051546392	0.012396694	0.006185567	0.134297521	0.053608247	0.026859504	0.094845361	0.099173554	0.068041237	0.074380165	0.051546392	0.035123967	0.053608247	0.07231405	0.051546392	0.047520661	0.053608247	0.018595041	0.018556701	0.02892562	0.039175258	0.016528926	0.026804124	0.055785124
YLR175W_YER141W	0	0	12	5	0	0	506136	453454	507587	454914	483	486	9.5	10.97	54.704	54.658	0.059917355	0.063655031	0.055785124	0.073921971	0.090909091	0.125256674	0.020661157	0.032854209	0.010330579	0.047227926	0.012396694	0.030800821	0.134297521	0.071868583	0.026859504	0.030800821	0.099173554	0.045174538	0.074380165	0.0862423	0.035123967	0.045174538	0.07231405	0.067761807	0.047520661	0.061601643	0.018595041	0.006160164	0.02892562	0.020533881	0.016528926	0.020533881	0.055785124
YLR175W_YML125C	0	0	12	13	0	1	506136	21700	507587	20762	483	312	9.5	5.31	54.704	35.287	0.059917355	0.07028754	0.055785124	0.047923323	0.090909091	0.10543131	0.020661157	0.019169329	0.010330579	0.028753994	0.012396694	0.012779553	0.134297521	0.060702875	0.026859504	0.022364217	0.099173554	0.063897764	0.074380165	0.07028754	0.035123967	0.047923323	0.07231405	0.079872204	0.047520661	0.073482428	0.018595041	0.003194888	0.02892562	0.063897764	0.016528926	0.022364217	0.055785124
YLR175W_YKL069W	0	0	12	11	0	0	506136	306929	507587	307471	483	180	9.5	4.78	54.704	19.734	0.059917355	0.082872928	0.055785124	0.060773481	0.090909091	0.08839779	0.020661157	0.011049724	0.010330579	0.038674033	0.012396694	0.016574586	0.134297521	0.071823204	0.026859504	0.038674033	0.099173554	0.066298343	0.074380165	0.082872928	0.035123967	0.022099448	0.07231405	0.077348066	0.047520661	0.071823204	0.018595041	0.033149171	0.02892562	0.033149171	0.016528926	0.033149171	0.055785124
YLR175W_YOR243C	0	0	12	15	0	1	506136	792242	507587	790212	483	676	9.5	7.9	54.704	77.002	0.059917355	0.050221566	0.055785124	0.06351551	0.090909091	0.087149188	0.020661157	0.025110783	0.010330579	0.033973412	0.012396694	0.005908419	0.134297521	0.085672083	0.026859504	0.038404727	0.099173554	0.081240768	0.074380165	0.069423929	0.035123967	0.029542097	0.07231405	0.064992614	0.047520661	0.059084195	0.018595041	0.005908419	0.02892562	0.032496307	0.016528926	0.014771049	0.055785124
YLR175W_YGR055W	0	0	12	7	0	0	506136	599421	507587	601145	483	574	9.5	7.68	54.704	63.221	0.059917355	0.093913043	0.055785124	0.083478261	0.090909091	0.086956522	0.020661157	0.017391304	0.010330579	0.073043478	0.012396694	0.022608696	0.134297521	0.046956522	0.026859504	0.034782609	0.099173554	0.03826087	0.074380165	0.069565217	0.035123967	0.033043478	0.07231405	0.083478261	0.047520661	0.095652174	0.018595041	0.010434783	0.02892562	0.046956522	0.016528926	0.008695652	0.055785124
YLR175W_YDR280W	0	0	12	4	0	0	506136	1020744	507587	1021661	483	305	9.5	4.83	54.704	33.962	0.059917355	0.065359477	0.055785124	0.062091503	0.090909091	0.075163399	0.020661157	0.026143791	0.010330579	0.045751634	0.012396694	0.003267974	0.134297521	0.058823529	0.026859504	0.032679739	0.099173554	0.094771242	0.074380165	0.068627451	0.035123967	0.032679739	0.07231405	0.071895425	0.047520661	0.094771242	0.018595041	0.032679739	0.02892562	0.013071895	0.016528926	0.022875817	0.055785124
YLR175W_YKR014C	0	0	12	11	0	1	506136	465714	507587	465010	483	234	9.5	4.52	54.704	26.132	0.059917355	0.072340426	0.055785124	0.05106383	0.090909091	0.085106383	0.020661157	0.008510638	0.010330579	0.029787234	0.012396694	0.008510638	0.134297521	0.076595745	0.026859504	0.063829787	0.099173554	0.085106383	0.074380165	0.076595745	0.035123967	0.025531915	0.07231405	0.068085106	0.047520661	0.059574468	0.018595041	0.012765957	0.02892562	0.029787234	0.016528926	0.008510638	0.055785124
YLR175W_YIL051C	0	0	12	9	0	1	506136	258279	507587	257842	483	145	9.5	10.06	54.704	15.908	0.059917355	0.02739726	0.055785124	0.102739726	0.090909091	0.075342466	0.020661157	0.02739726	0.010330579	0.047945205	0.012396694	0	0.134297521	0.068493151	0.026859504	0.034246575	0.099173554	0.047945205	0.074380165	0.089041096	0.035123967	0.061643836	0.07231405	0.116438356	0.047520661	0.04109589	0.018595041	0.006849315	0.02892562	0.02739726	0.016528926	0.020547945	0.055785124
YLR175W_YPR010C	0	0	12	16	0	1	506136	581193	507587	577582	483	1203	9.5	7.61	54.704	135.741	0.059917355	0.083056478	0.055785124	0.041528239	0.090909091	0.085548173	0.020661157	0.028239203	0.010330579	0.043189369	0.012396694	0.008305648	0.134297521	0.055647841	0.026859504	0.049003322	0.099173554	0.055647841	0.074380165	0.071428571	0.035123967	0.050664452	0.07231405	0.066445183	0.047520661	0.064784053	0.018595041	0.014950166	0.02892562	0.040697674	0.016528926	0.024916944	0.055785124
YLR175W_YGR157W	0	0	12	7	0	0	506136	802445	507587	805054	483	869	9.5	8.56	54.704	101.203	0.059917355	0.052873563	0.055785124	0.031034483	0.090909091	0.108045977	0.020661157	0.01954023	0.010330579	0.068965517	0.012396694	0.025287356	0.134297521	0.06091954	0.026859504	0.031034483	0.099173554	0.048275862	0.074380165	0.077011494	0.035123967	0.026436782	0.07231405	0.068965517	0.047520661	0.079310345	0.018595041	0.009195402	0.02892562	0.057471264	0.016528926	0.020689655	0.055785124
YLR175W_YNL099C	0	0	12	14	0	1	506136	439285	507587	438569	483	238	9.5	4.21	54.704	27.205	0.059917355	0.054393305	0.055785124	0.033472803	0.090909091	0.10460251	0.020661157	0.012552301	0.010330579	0.029288703	0.012396694	0.016736402	0.134297521	0.029288703	0.026859504	0.025104603	0.099173554	0.129707113	0.074380165	0.054393305	0.035123967	0.058577406	0.07231405	0.071129707	0.047520661	0.062761506	0.018595041	0.020920502	0.02892562	0.025104603	0.016528926	0.020920502	0.055785124
YLR175W_YPR173C	0	0	12	16	0	1	506136	887833	507587	886520	483	437	9.5	4.96	54.704	48.172	0.059917355	0.077625571	0.055785124	0.082191781	0.090909091	0.093607306	0.020661157	0.020547945	0.010330579	0.03196347	0.012396694	0.00913242	0.134297521	0.089041096	0.026859504	0.029680365	0.099173554	0.091324201	0.074380165	0.073059361	0.035123967	0.04109589	0.07231405	0.047945205	0.047520661	0.052511416	0.018595041	0.00456621	0.02892562	0.02739726	0.016528926	0.006849315	0.055785124
YLR175W_YOR312C	0	0	12	15	0	1	506136	901191	507587	900247	483	172	9.5	11.12	54.704	20.437	0.059917355	0.023121387	0.055785124	0.069364162	0.090909091	0.052023121	0.020661157	0.023121387	0.010330579	0.057803468	0.012396694	0.011560694	0.134297521	0.10982659	0.026859504	0.040462428	0.099173554	0.057803468	0.074380165	0.069364162	0.035123967	0.040462428	0.07231405	0.086705202	0.047520661	0.057803468	0.018595041	0	0.02892562	0.052023121	0.016528926	0.040462428	0.055785124
YLR175W_YER110C	0	0	12	5	0	1	506136	382099	507587	378758	483	1113	9.5	4.36	54.704	122.6	0.059917355	0.035008977	0.055785124	0.107719928	0.090909091	0.113105925	0.020661157	0.018850987	0.010330579	0.044883303	0.012396694	0.002692998	0.134297521	0.051166966	0.026859504	0.042190305	0.099173554	0.090664273	0.074380165	0.08438061	0.035123967	0.033213645	0.07231405	0.068222621	0.047520661	0.071813285	0.018595041	0.008078995	0.02892562	0.026032316	0.016528926	0.013464991	0.055785124
YLR175W_YBR268W	0	0	12	2	0	0	506136	741294	507587	741611	483	105	9.5	10.67	54.704	11.949	0.059917355	0.037735849	0.055785124	0.075471698	0.090909091	0.122641509	0.020661157	0.009433962	0.010330579	0.009433962	0.012396694	0.028301887	0.134297521	0.08490566	0.026859504	0.037735849	0.099173554	0.047169811	0.074380165	0.103773585	0.035123967	0.037735849	0.07231405	0.066037736	0.047520661	0.047169811	0.018595041	0.009433962	0.02892562	0.028301887	0.016528926	0.018867925	0.055785124
YLR175W_YHR007C	0	0	12	8	0	1	506136	121678	507587	120086	483	530	9.5	9.25	54.704	60.72	0.059917355	0.064030132	0.055785124	0.056497175	0.090909091	0.097928437	0.020661157	0.033898305	0.010330579	0.050847458	0.012396694	0.013182674	0.134297521	0.069679849	0.026859504	0.032015066	0.099173554	0.058380414	0.074380165	0.060263653	0.035123967	0.056497175	0.07231405	0.065913371	0.047520661	0.062146893	0.018595041	0.007532957	0.02892562	0.054613936	0.016528926	0.033898305	0.055785124
YLR175W_YIL090W	0	0	12	9	0	0	506136	193592	507587	195067	483	491	9.5	9.14	54.704	56.332	0.059917355	0.054878049	0.055785124	0.040650407	0.090909091	0.130081301	0.020661157	0.014227642	0.010330579	0.075203252	0.012396694	0.026422764	0.134297521	0.052845528	0.026859504	0.030487805	0.099173554	0.036585366	0.074380165	0.099593496	0.035123967	0.028455285	0.07231405	0.056910569	0.047520661	0.087398374	0.018595041	0.028455285	0.02892562	0.054878049	0.016528926	0.012195122	0.055785124
YLR175W_YML032C	0	0	12	13	0	1	506136	213930	507587	212515	483	471	9.5	8.56	54.704	52.403	0.059917355	0.052966102	0.055785124	0.074152542	0.090909091	0.055084746	0.020661157	0.021186441	0.010330579	0.038135593	0.012396694	0.004237288	0.134297521	0.084745763	0.026859504	0.044491525	0.099173554	0.061440678	0.074380165	0.072033898	0.035123967	0.063559322	0.07231405	0.059322034	0.047520661	0.046610169	0.018595041	0.004237288	0.02892562	0.021186441	0.016528926	0.014830508	0.055785124
YLR175W_YCR067C	0	0	12	3	0	1	506136	236318	507587	233121	483	1065	9.5	4.45	54.704	114.078	0.059917355	0.033771107	0.055785124	0.063789869	0.090909091	0.072232645	0.020661157	0.015009381	0.010330579	0.041275797	0.012396694	0.001876173	0.134297521	0.042213884	0.026859504	0.019699812	0.099173554	0.066604128	0.074380165	0.182926829	0.035123967	0.045966229	0.07231405	0.074108818	0.047520661	0.071294559	0.018595041	0.001876173	0.02892562	0.01782364	0.016528926	0.015947467	0.055785124
YLR175W_YGL126W	0	0	12	7	0	0	506136	271003	507587	272145	483	380	9.5	10.62	54.704	42.735	0.059917355	0.086614173	0.055785124	0.102362205	0.090909091	0.120734908	0.020661157	0.023622047	0.010330579	0.039370079	0.012396694	0.044619423	0.134297521	0.020997375	0.026859504	0.044619423	0.099173554	0.01312336	0.074380165	0.034120735	0.035123967	0.031496063	0.07231405	0.081364829	0.047520661	0.044619423	0.018595041	0.026246719	0.02892562	0.028871391	0.016528926	0.049868766	0.055785124
YLR175W_YBR173C	0	0	12	2	0	1	506136	582167	507587	581721	483	148	9.5	4.87	54.704	16.76	0.059917355	0.053691275	0.055785124	0.026845638	0.090909091	0.080536913	0.020661157	0.040268456	0.010330579	0.020134228	0.012396694	0.013422819	0.134297521	0.046979866	0.026859504	0.087248322	0.099173554	0.067114094	0.074380165	0.087248322	0.035123967	0.053691275	0.07231405	0.060402685	0.047520661	0.060402685	0.018595041	0.006711409	0.02892562	0.013422819	0.016528926	0.020134228	0.055785124
YLR175W_YNL135C	0	0	12	14	0	1	506136	372228	507587	371884	483	114	9.5	5.87	54.704	12.158	0.059917355	0.139130435	0.055785124	0.026086957	0.090909091	0.069565217	0.020661157	0.008695652	0.010330579	0.043478261	0.012396694	0.008695652	0.134297521	0.060869565	0.026859504	0.026086957	0.099173554	0.043478261	0.074380165	0.060869565	0.035123967	0.086956522	0.07231405	0.095652174	0.047520661	0.07826087	0.018595041	0.008695652	0.02892562	0.026086957	0.016528926	0.008695652	0.055785124
YLR175W_YDR059C	0	0	12	4	0	1	506136	569769	507587	569233	483	148	9.5	6.76	54.704	16.28	0.059917355	0.046979866	0.055785124	0.080536913	0.090909091	0.087248322	0.020661157	0.013422819	0.010330579	0.033557047	0.012396694	0.020134228	0.134297521	0.087248322	0.026859504	0.020134228	0.099173554	0.026845638	0.074380165	0.10738255	0.035123967	0.093959732	0.07231405	0.040268456	0.047520661	0.067114094	0.018595041	0.020134228	0.02892562	0.046979866	0.016528926	0.020134228	0.055785124
YLR175W_YGL056C	0	0	12	7	0	1	506136	397624	507587	396041	483	527	9.5	9.76	54.704	58.111	0.059917355	0.035984848	0.055785124	0.039772727	0.090909091	0.104166667	0.020661157	0.017045455	0.010330579	0.022727273	0.012396694	0.005681818	0.134297521	0.056818182	0.026859504	0.045454545	0.099173554	0.045454545	0.074380165	0.136363636	0.035123967	0.071969697	0.07231405	0.064393939	0.047520661	0.058712121	0.018595041	0.007575758	0.02892562	0.018939394	0.016528926	0.034090909	0.055785124
YLR175W_YOR007C	0	0	12	15	0	1	506136	339979	507587	338939	483	346	9.5	4.51	54.704	37.218	0.059917355	0.080691643	0.055785124	0.129682997	0.090909091	0.07204611	0.020661157	0.043227666	0.010330579	0.023054755	0.012396694	0	0.134297521	0.080691643	0.026859504	0.04610951	0.099173554	0.089337176	0.074380165	0.083573487	0.035123967	0.037463977	0.07231405	0.034582133	0.047520661	0.048991354	0.018595041	0.002881844	0.02892562	0.031700288	0.016528926	0.005763689	0.055785124
YDR293C_YPR028W	0	0	4	16	1	0	1049389	623524	1045637	624199	1250	180	7.67	9.87	139.953	20.269	0.049560352	0.055248619	0.060751399	0.077348066	0.090327738	0.127071823	0.012789768	0.016574586	0.034372502	0.060773481	0.006394884	0.016574586	0.06314948	0.060773481	0.053557154	0.038674033	0.060751399	0.038674033	0.105515588	0.08839779	0.055955236	0.033149171	0.051159073	0.066298343	0.051159073	0.082872928	0.004796163	0	0.026378897	0.060773481	0.028776978	0.011049724	0.055955236
YDR293C_YPR063C	0	0	4	16	1	1	1049389	678317	1045637	677809	1250	140	7.67	7.1	139.953	15.441	0.049560352	0.035460993	0.060751399	0.078014184	0.090327738	0.070921986	0.012789768	0.042553191	0.034372502	0.035460993	0.006394884	0.007092199	0.06314948	0.063829787	0.053557154	0.04964539	0.060751399	0.04964539	0.105515588	0.092198582	0.055955236	0.078014184	0.051159073	0.063829787	0.051159073	0.078014184	0.004796163	0.021276596	0.026378897	0.042553191	0.028776978	0.007092199	0.055955236
YDR293C_YBR086C	0	0	4	2	1	1	1049389	423035	1045637	420195	1250	946	7.67	9.73	139.953	105.853	0.049560352	0.032734952	0.060751399	0.066525871	0.090327738	0.090813094	0.012789768	0.010559662	0.034372502	0.058078141	0.006394884	0.011615628	0.06314948	0.085533263	0.053557154	0.034846885	0.060751399	0.045406547	0.105515588	0.114044351	0.055955236	0.050686378	0.051159073	0.060190074	0.051159073	0.071805702	0.004796163	0.00844773	0.026378897	0.034846885	0.028776978	0.028511088	0.055955236
YDR293C_YOR027W	0	0	4	15	1	0	1049389	381053	1045637	382822	1250	589	7.67	5.36	139.953	66.264	0.049560352	0.03559322	0.060751399	0.125423729	0.090327738	0.069491525	0.012789768	0.027118644	0.034372502	0.022033898	0.006394884	0.005084746	0.06314948	0.101694915	0.053557154	0.055932203	0.060751399	0.1	0.105515588	0.061016949	0.055955236	0.040677966	0.051159073	0.028813559	0.051159073	0.047457627	0.004796163	0.005084746	0.026378897	0.042372881	0.028776978	0.013559322	0.055955236
YDR293C_YDL136W	0	0	4	4	1	0	1049389	217600	1045637	218367	1250	120	7.67	11.36	139.953	13.909	0.049560352	0.016528926	0.060751399	0.107438017	0.090327738	0.107438017	0.012789768	0.008264463	0.034372502	0.016528926	0.006394884	0	0.06314948	0.181818182	0.053557154	0.090909091	0.060751399	0.066115702	0.105515588	0.049586777	0.055955236	0.033057851	0.051159073	0.066115702	0.051159073	0.041322314	0.004796163	0.008264463	0.026378897	0.033057851	0.028776978	0	0.055955236
YDR293C_YPR034W	0	0	4	16	1	0	1049389	639522	1045637	640955	1250	477	7.67	5.23	139.953	53.81	0.049560352	0.054393305	0.060751399	0.064853556	0.090327738	0.094142259	0.012789768	0.033472803	0.034372502	0.037656904	0.006394884	0.014644351	0.06314948	0.071129707	0.053557154	0.058577406	0.060751399	0.066945607	0.105515588	0.075313808	0.055955236	0.043933054	0.051159073	0.054393305	0.051159073	0.062761506	0.004796163	0.008368201	0.026378897	0.039748954	0.028776978	0.008368201	0.055955236
YDR293C_YDL072C	0	0	4	4	1	1	1049389	330447	1045637	329836	1250	203	7.67	7.19	139.953	22.902	0.049560352	0.029411765	0.060751399	0.073529412	0.090327738	0.132352941	0.012789768	0.019607843	0.034372502	0.058823529	0.006394884	0	0.06314948	0.068627451	0.053557154	0.039215686	0.060751399	0.058823529	0.105515588	0.088235294	0.055955236	0.029411765	0.051159073	0.073529412	0.051159073	0.093137255	0.004796163	0.009803922	0.026378897	0.029411765	0.028776978	0.004901961	0.055955236
YDR293C_YML072C	0	0	4	13	1	1	1049389	129367	1045637	124730	1250	1545	7.67	7.14	139.953	171.074	0.049560352	0.064683053	0.060751399	0.053686934	0.090327738	0.078913325	0.012789768	0.015523933	0.034372502	0.038809832	0.006394884	0.010996119	0.06314948	0.098965071	0.053557154	0.033635188	0.060751399	0.06080207	0.105515588	0.09702458	0.055955236	0.051099612	0.051159073	0.065976714	0.051159073	0.065976714	0.004796163	0.005174644	0.026378897	0.026520052	0.028776978	0.018758085	0.055955236
YDR293C_YNL135C	0	0	4	14	1	1	1049389	372228	1045637	371884	1250	114	7.67	5.87	139.953	12.158	0.049560352	0.139130435	0.060751399	0.026086957	0.090327738	0.069565217	0.012789768	0.008695652	0.034372502	0.043478261	0.006394884	0.008695652	0.06314948	0.060869565	0.053557154	0.026086957	0.060751399	0.043478261	0.105515588	0.060869565	0.055955236	0.086956522	0.051159073	0.095652174	0.051159073	0.07826087	0.004796163	0.008695652	0.026378897	0.026086957	0.028776978	0.008695652	0.055955236
YDR293C_YMR241W	0	0	4	13	1	0	1049389	751960	1045637	752904	1250	314	7.67	10.68	139.953	34.184	0.049560352	0.114285714	0.060751399	0.073015873	0.090327738	0.076190476	0.012789768	0.028571429	0.034372502	0.044444444	0.006394884	0.022222222	0.06314948	0.079365079	0.053557154	0.028571429	0.060751399	0.050793651	0.105515588	0.066666667	0.055955236	0.034920635	0.051159073	0.079365079	0.051159073	0.06031746	0.004796163	0.00952381	0.026378897	0.025396825	0.028776978	0.00952381	0.055955236
YDR293C_YGR210C	0	0	4	7	1	1	1049389	914743	1045637	913508	1250	411	7.67	8.33	139.953	45.214	0.049560352	0.094660194	0.060751399	0.060679612	0.090327738	0.094660194	0.012789768	0.014563107	0.034372502	0.038834951	0.006394884	0.014563107	0.06314948	0.082524272	0.053557154	0.024271845	0.060751399	0.053398058	0.105515588	0.048543689	0.055955236	0.050970874	0.051159073	0.082524272	0.051159073	0.063106796	0.004796163	0.012135922	0.026378897	0.02184466	0.028776978	0.016990291	0.055955236
YDR293C_YER055C	0	0	4	5	1	1	1049389	265784	1045637	264891	1250	297	7.67	5.99	139.953	32.266	0.049560352	0.067114094	0.060751399	0.073825503	0.090327738	0.100671141	0.012789768	0.020134228	0.034372502	0.033557047	0.006394884	0.003355705	0.06314948	0.073825503	0.053557154	0.023489933	0.060751399	0.060402685	0.105515588	0.080536913	0.055955236	0.036912752	0.051159073	0.100671141	0.051159073	0.077181208	0.004796163	0.016778523	0.026378897	0.016778523	0.028776978	0.006711409	0.055955236
YDR293C_YIL135C	0	0	4	9	1	1	1049389	96375	1045637	95065	1250	436	7.67	10.01	139.953	47.961	0.049560352	0.034324943	0.060751399	0.057208238	0.090327738	0.061784897	0.012789768	0.029748284	0.034372502	0.029748284	0.006394884	0	0.06314948	0.029748284	0.053557154	0.041189931	0.060751399	0.029748284	0.105515588	0.176201373	0.055955236	0.073226545	0.051159073	0.027459954	0.051159073	0.032036613	0.004796163	0.00228833	0.026378897	0.025171625	0.028776978	0.034324943	0.055955236
YDR293C_YGR007W	0	0	4	7	1	0	1049389	506973	1045637	507944	1250	323	7.67	6.44	139.953	36.863	0.049560352	0.055555556	0.060751399	0.049382716	0.090327738	0.058641975	0.012789768	0.030864198	0.034372502	0.030864198	0.006394884	0.009259259	0.06314948	0.077160494	0.053557154	0.033950617	0.060751399	0.052469136	0.105515588	0.061728395	0.055955236	0.027777778	0.051159073	0.092592593	0.051159073	0.055555556	0.004796163	0.027777778	0.026378897	0.055555556	0.028776978	0.040123457	0.055955236
YDR293C_YOR046C	0	0	4	15	1	1	1049389	415908	1045637	414460	1250	482	7.67	7.48	139.953	53.873	0.049560352	0.045548654	0.060751399	0.070393375	0.090327738	0.099378882	0.012789768	0.02484472	0.034372502	0.033126294	0.006394884	0.002070393	0.06314948	0.095238095	0.053557154	0.053830228	0.060751399	0.064182195	0.105515588	0.062111801	0.055955236	0.045548654	0.051159073	0.072463768	0.051159073	0.066252588	0.004796163	0.00621118	0.026378897	0.020703934	0.028776978	0.010351967	0.055955236
YDR293C_YLR335W	0	0	4	12	1	0	1049389	797430	1045637	799592	1250	720	7.67	7.34	139.953	77.88	0.049560352	0.045769764	0.060751399	0.081830791	0.090327738	0.044382802	0.012789768	0.0110957	0.034372502	0.062413315	0.006394884	0	0.06314948	0.123439667	0.053557154	0.024965326	0.060751399	0.074895978	0.105515588	0.137309293	0.055955236	0.066574202	0.051159073	0.044382802	0.051159073	0.026352288	0.004796163	0.001386963	0.026378897	0.008321775	0.028776978	0.001386963	0.055955236
YDR293C_YDL061C	0	0	4	4	1	1	1049389	340798	1045637	340628	1250	56	7.67	10.8	139.953	6.728	0.049560352	0.070175439	0.060751399	0.035087719	0.090327738	0.035087719	0.012789768	0.01754386	0.034372502	0.070175439	0.006394884	0.01754386	0.06314948	0.070175439	0.053557154	0.035087719	0.060751399	0.035087719	0.105515588	0.070175439	0.055955236	0.01754386	0.051159073	0.052631579	0.051159073	0.035087719	0.004796163	0.070175439	0.026378897	0.035087719	0.028776978	0.070175439	0.055955236
YDR293C_YHR030C	0	0	4	8	1	1	1049389	170337	1045637	168883	1250	484	7.67	5.07	139.953	55.636	0.049560352	0.049484536	0.060751399	0.059793814	0.090327738	0.098969072	0.012789768	0.024742268	0.034372502	0.051546392	0.006394884	0.006185567	0.06314948	0.053608247	0.053557154	0.094845361	0.060751399	0.068041237	0.105515588	0.051546392	0.055955236	0.053608247	0.051159073	0.051546392	0.051159073	0.053608247	0.004796163	0.018556701	0.026378897	0.039175258	0.028776978	0.026804124	0.055955236
YDR293C_YCL045C	0	0	4	3	1	1	1049389	46905	1045637	44623	1250	760	7.67	5.06	139.953	87.181	0.049560352	0.036793693	0.060751399	0.032851511	0.090327738	0.111695138	0.012789768	0.017082786	0.034372502	0.051248357	0.006394884	0.019710907	0.06314948	0.068331143	0.053557154	0.034165572	0.060751399	0.05781866	0.105515588	0.073587385	0.055955236	0.043363995	0.051159073	0.068331143	0.051159073	0.077529566	0.004796163	0.007884363	0.026378897	0.031537451	0.028776978	0.026281209	0.055955236
YDR293C_YDR225W	0	0	4	4	1	0	1049389	915527	1045637	915925	1250	132	7.67	11.43	139.953	13.989	0.049560352	0.105263158	0.060751399	0.142857143	0.090327738	0.127819549	0.012789768	0.007518797	0.034372502	0.007518797	0.006394884	0	0.06314948	0.082706767	0.053557154	0.045112782	0.060751399	0.037593985	0.105515588	0.060150376	0.055955236	0.037593985	0.051159073	0.045112782	0.051159073	0.052631579	0.004796163	0	0.026378897	0.022556391	0.028776978	0.022556391	0.055955236
YDR293C_YJL011C	0	0	4	10	1	1	1049389	414763	1045637	414278	1250	161	7.67	5.5	139.953	18.61	0.049560352	0.030864198	0.060751399	0.067901235	0.090327738	0.104938272	0.012789768	0.030864198	0.034372502	0.043209877	0.006394884	0.00617284	0.06314948	0.111111111	0.053557154	0.037037037	0.060751399	0.12345679	0.105515588	0.086419753	0.055955236	0.018518519	0.051159073	0.043209877	0.051159073	0.055555556	0.004796163	0.00617284	0.026378897	0.030864198	0.028776978	0.018518519	0.055955236
YPL184C_YJR059W	0	0	16	10	1	0	197787	545779	195949	548235	612	818	5.74	9.52	68.663	91.4	0.057096248	0.051282051	0.070146819	0.046398046	0.061990212	0.072039072	0.017944535	0.023199023	0.057096248	0.039072039	0.003262643	0.004884005	0.044045677	0.089133089	0.052202284	0.023199023	0.053833605	0.051282051	0.073409462	0.114774115	0.052202284	0.064713065	0.060358891	0.045177045	0.070146819	0.045177045	0.014681892	0.00976801	0.039151713	0.026862027	0.016313214	0.036630037	0.04730832
YPL184C_YOL042W	0	0	16	15	1	0	197787	249824	195949	250915	612	363	5.74	8.33	68.663	42.398	0.057096248	0.049450549	0.070146819	0.019230769	0.061990212	0.120879121	0.017944535	0.024725275	0.057096248	0.046703297	0.003262643	0.016483516	0.044045677	0.082417582	0.052202284	0.035714286	0.053833605	0.041208791	0.073409462	0.063186813	0.052202284	0.038461538	0.060358891	0.074175824	0.070146819	0.06043956	0.014681892	0.013736264	0.039151713	0.063186813	0.016313214	0.024725275	0.04730832
YPL184C_YPL243W	0	0	16	16	1	0	197787	88517	195949	90316	612	599	5.74	9.44	68.663	69.005	0.057096248	0.033333333	0.070146819	0.055	0.061990212	0.138333333	0.017944535	0.011666667	0.057096248	0.031666667	0.003262643	0.006666667	0.044045677	0.101666667	0.052202284	0.046666667	0.053833605	0.075	0.073409462	0.071666667	0.052202284	0.025	0.060358891	0.043333333	0.070146819	0.063333333	0.014681892	0.006666667	0.039151713	0.043333333	0.016313214	0.018333333	0.04730832
YPL184C_YBL027W	0	0	16	2	1	0	197787	168426	195949	169379	612	189	5.74	11.93	68.663	21.704	0.057096248	0.047368421	0.070146819	0.136842105	0.061990212	0.084210526	0.017944535	0.005263158	0.057096248	0.005263158	0.003262643	0.010526316	0.044045677	0.121052632	0.052202284	0.036842105	0.053833605	0.063157895	0.073409462	0.047368421	0.052202284	0.010526316	0.060358891	0.073684211	0.070146819	0.036842105	0.014681892	0	0.039151713	0.021052632	0.016313214	0.036842105	0.04730832
YPL184C_YJL076W	0	0	16	10	1	0	197787	295239	195949	298808	612	1189	5.74	8.09	68.663	128.53	0.057096248	0.042857143	0.070146819	0.056302521	0.061990212	0.057142857	0.017944535	0.014285714	0.057096248	0.020168067	0.003262643	0.001680672	0.044045677	0.102521008	0.052202284	0.040336134	0.053833605	0.062184874	0.073409462	0.165546218	0.052202284	0.072268908	0.060358891	0.05210084	0.070146819	0.050420168	0.014681892	0.001680672	0.039151713	0.009243697	0.016313214	0.008403361	0.04730832
YPL184C_YCR059C	0	0	16	3	1	1	197787	224226	195949	223450	612	258	5.74	4.36	68.663	29.017	0.057096248	0.05019305	0.070146819	0.081081081	0.061990212	0.069498069	0.017944535	0.034749035	0.057096248	0.046332046	0.003262643	0.015444015	0.044045677	0.038610039	0.052202284	0.042471042	0.053833605	0.084942085	0.073409462	0.069498069	0.052202284	0.042471042	0.060358891	0.088803089	0.070146819	0.05019305	0.014681892	0.007722008	0.039151713	0.027027027	0.016313214	0.038610039	0.04730832
YPL184C_YMR062C	0	0	16	13	1	1	197787	396378	195949	395053	612	441	5.74	7.1	68.663	47.848	0.057096248	0.07239819	0.070146819	0.076923077	0.061990212	0.092760181	0.017944535	0.027149321	0.057096248	0.040723982	0.003262643	0.00678733	0.044045677	0.07918552	0.052202284	0.033936652	0.053833605	0.045248869	0.073409462	0.07918552	0.052202284	0.022624434	0.060358891	0.074660633	0.070146819	0.06561086	0.014681892	0.015837104	0.039151713	0.018099548	0.016313214	0.004524887	0.04730832
YPL184C_YGR118W	0	0	16	7	1	0	197787	726978	195949	727735	612	145	5.74	11.47	68.663	16.038	0.057096248	0.109589041	0.070146819	0.061643836	0.061990212	0.089041096	0.017944535	0.006849315	0.057096248	0.04109589	0.003262643	0.01369863	0.044045677	0.150684932	0.052202284	0.01369863	0.053833605	0.047945205	0.073409462	0.068493151	0.052202284	0.04109589	0.060358891	0.089041096	0.070146819	0.034246575	0.014681892	0.01369863	0.039151713	0.006849315	0.016313214	0.01369863	0.04730832
YPL184C_YBL003C	0	0	16	2	1	1	197787	235795	195949	235397	612	132	5.74	11.43	68.663	13.989	0.057096248	0.105263158	0.070146819	0.142857143	0.061990212	0.127819549	0.017944535	0.007518797	0.057096248	0.007518797	0.003262643	0	0.044045677	0.082706767	0.052202284	0.045112782	0.053833605	0.037593985	0.073409462	0.060150376	0.052202284	0.037593985	0.060358891	0.045112782	0.070146819	0.052631579	0.014681892	0	0.039151713	0.022556391	0.016313214	0.022556391	0.04730832
YPL184C_YDL121C	0	0	16	4	1	1	197787	245582	195949	245133	612	149	5.74	8.91	68.663	16.947	0.057096248	0.066666667	0.070146819	0.06	0.061990212	0.12	0.017944535	0.006666667	0.057096248	0.06	0.003262643	0	0.044045677	0.133333333	0.052202284	0.013333333	0.053833605	0.08	0.073409462	0.073333333	0.052202284	0.02	0.060358891	0.026666667	0.070146819	0.06	0.014681892	0	0.039151713	0.04	0.016313214	0.013333333	0.04730832
YPL184C_YOR323C	0	0	16	15	1	1	197787	922902	195949	921532	612	456	5.74	5.33	68.663	49.74	0.057096248	0.074398249	0.070146819	0.096280088	0.061990212	0.096280088	0.017944535	0.013129103	0.057096248	0.032822757	0.003262643	0.006564551	0.044045677	0.085339168	0.052202284	0.032822757	0.053833605	0.06345733	0.073409462	0.06345733	0.052202284	0.019693654	0.060358891	0.072210066	0.070146819	0.072210066	0.014681892	0.006564551	0.039151713	0.024070022	0.016313214	0.019693654	0.04730832
YPL184C_YGL211W	0	0	16	7	1	0	197787	92516	195949	93595	612	359	5.74	8.97	68.663	39.987	0.057096248	0.061111111	0.070146819	0.083333333	0.061990212	0.097222222	0.017944535	0.022222222	0.057096248	0.033333333	0.003262643	0.002777778	0.044045677	0.080555556	0.052202284	0.030555556	0.053833605	0.055555556	0.073409462	0.080555556	0.052202284	0.025	0.060358891	0.063888889	0.070146819	0.063888889	0.014681892	0.036111111	0.039151713	0.038888889	0.016313214	0.016666667	0.04730832
YPL184C_YER060W	0	0	16	5	1	0	197787	274565	195949	276151	612	528	5.74	5.31	68.663	58.05	0.057096248	0.086956522	0.070146819	0.109640832	0.061990212	0.088846881	0.017944535	0.026465028	0.057096248	0.069943289	0.003262643	0.026465028	0.044045677	0.028355388	0.052202284	0.017013233	0.053833605	0.041587902	0.073409462	0.064272212	0.052202284	0.035916824	0.060358891	0.077504726	0.070146819	0.081285444	0.014681892	0.015122873	0.039151713	0.052930057	0.016313214	0.013232514	0.04730832
YPL184C_YDR335W	0	0	16	4	1	0	197787	1141163	195949	1144837	612	1224	5.74	5.07	68.663	142.116	0.057096248	0.031020408	0.070146819	0.044081633	0.061990212	0.128979592	0.017944535	0.027755102	0.057096248	0.048163265	0.003262643	0.019591837	0.044045677	0.068571429	0.052202284	0.035918367	0.053833605	0.067755102	0.073409462	0.071020408	0.052202284	0.036734694	0.060358891	0.053061224	0.070146819	0.076734694	0.014681892	0.01877551	0.039151713	0.036734694	0.016313214	0.014693878	0.04730832
YPL184C_YBL079W	0	0	16	2	1	0	197787	75256	195949	79764	612	1502	5.74	6.04	68.663	169.473	0.057096248	0.043912176	0.070146819	0.055222888	0.061990212	0.095808383	0.017944535	0.018629408	0.057096248	0.05655356	0.003262643	0.00665336	0.044045677	0.065202927	0.052202284	0.03992016	0.053833605	0.061876248	0.073409462	0.101796407	0.052202284	0.037258816	0.060358891	0.054557552	0.070146819	0.087824351	0.014681892	0.008649368	0.039151713	0.03659348	0.016313214	0.017964072	0.04730832
YPL184C_YKR081C	0	0	16	11	1	1	197787	592182	195949	591148	612	344	5.74	9.75	68.663	39.598	0.057096248	0.060869565	0.070146819	0.04057971	0.061990212	0.086956522	0.017944535	0.046376812	0.057096248	0.060869565	0.003262643	0	0.044045677	0.124637681	0.052202284	0.043478261	0.053833605	0.069565217	0.073409462	0.055072464	0.052202284	0.043478261	0.060358891	0.052173913	0.070146819	0.049275362	0.014681892	0.005797101	0.039151713	0.023188406	0.016313214	0.020289855	0.04730832
YPL184C_YMR236W	0	0	16	13	1	0	197787	742970	195949	743443	612	157	5.74	6.27	68.663	17.315	0.057096248	0.082278481	0.070146819	0.082278481	0.061990212	0.120253165	0.017944535	0.03164557	0.057096248	0.012658228	0.003262643	0.012658228	0.044045677	0.063291139	0.052202284	0.063291139	0.053833605	0.063291139	0.073409462	0.063291139	0.052202284	0.056962025	0.060358891	0.069620253	0.070146819	0.018987342	0.014681892	0.006329114	0.039151713	0.037974684	0.016313214	0.018987342	0.04730832
YPL184C_YKL013C	0	0	16	11	1	1	197787	417666	195949	417151	612	171	5.74	5.22	68.663	19.916	0.057096248	0.011627907	0.070146819	0.063953488	0.061990212	0.104651163	0.017944535	0.034883721	0.057096248	0.058139535	0.003262643	0	0.044045677	0.040697674	0.052202284	0.040697674	0.053833605	0.11627907	0.073409462	0.087209302	0.052202284	0.040697674	0.060358891	0.081395349	0.070146819	0.069767442	0.014681892	0	0.039151713	0.034883721	0.016313214	0.023255814	0.04730832
YPL184C_YNL186W	0	0	16	14	1	0	197787	289500	195949	291878	612	792	5.74	5.26	68.663	88.516	0.057096248	0.044136192	0.070146819	0.05296343	0.061990212	0.075662043	0.017944535	0.020176545	0.057096248	0.021437579	0.003262643	0.00630517	0.044045677	0.09962169	0.052202284	0.023959647	0.053833605	0.094577554	0.073409462	0.123581337	0.052202284	0.044136192	0.060358891	0.039092055	0.070146819	0.058007566	0.014681892	0.010088272	0.039151713	0.031525851	0.016313214	0.020176545	0.04730832
YPL184C_YMR080C	0	0	16	13	1	1	197787	429626	195949	426711	612	971	5.74	6.45	68.663	109.429	0.057096248	0.054526749	0.070146819	0.060699588	0.061990212	0.101851852	0.017944535	0.014403292	0.057096248	0.040123457	0.003262643	0.013374486	0.044045677	0.061728395	0.052202284	0.051440329	0.053833605	0.067901235	0.073409462	0.082304527	0.052202284	0.04526749	0.060358891	0.066872428	0.070146819	0.055555556	0.014681892	0.019547325	0.039151713	0.028806584	0.016313214	0.022633745	0.04730832
YPL184C_YPR028W	0	0	16	16	1	0	197787	623524	195949	624199	612	180	5.74	9.87	68.663	20.269	0.057096248	0.055248619	0.070146819	0.077348066	0.061990212	0.127071823	0.017944535	0.016574586	0.057096248	0.060773481	0.003262643	0.016574586	0.044045677	0.060773481	0.052202284	0.038674033	0.053833605	0.038674033	0.073409462	0.08839779	0.052202284	0.033149171	0.060358891	0.066298343	0.070146819	0.082872928	0.014681892	0	0.039151713	0.060773481	0.016313214	0.011049724	0.04730832
YPL184C_YMR286W	0	0	16	13	1	0	197787	841941	195949	842201	612	86	5.74	11	68.663	9.531	0.057096248	0.068965517	0.070146819	0.034482759	0.061990212	0.091954023	0.017944535	0.011494253	0.057096248	0.022988506	0.003262643	0	0.044045677	0.126436782	0.052202284	0.022988506	0.053833605	0.068965517	0.073409462	0.091954023	0.052202284	0.045977011	0.060358891	0.126436782	0.070146819	0.068965517	0.014681892	0	0.039151713	0.022988506	0.016313214	0.022988506	0.04730832
YPL184C_YEL040W	0	0	16	5	1	0	197787	78053	195949	79456	612	467	5.74	4.45	68.663	49.906	0.057096248	0.066239316	0.070146819	0.068376068	0.061990212	0.049145299	0.017944535	0.012820513	0.057096248	0.023504274	0.003262643	0.021367521	0.044045677	0.047008547	0.052202284	0.021367521	0.053833605	0.040598291	0.073409462	0.183760684	0.052202284	0.027777778	0.060358891	0.070512821	0.070146819	0.040598291	0.014681892	0.025641026	0.039151713	0.053418803	0.016313214	0.012820513	0.04730832
YPL184C_YDR204W	0	0	16	4	1	0	197787	858135	195949	859142	612	335	5.74	10.48	68.663	38.627	0.057096248	0.047619048	0.070146819	0.086309524	0.061990212	0.12797619	0.017944535	0.032738095	0.057096248	0.026785714	0.003262643	0.011904762	0.044045677	0.071428571	0.052202284	0.023809524	0.053833605	0.071428571	0.073409462	0.032738095	0.052202284	0.05952381	0.060358891	0.038690476	0.070146819	0.06547619	0.014681892	0.008928571	0.039151713	0.044642857	0.016313214	0.026785714	0.04730832
YPL184C_YDR381W	0	0	16	4	1	0	197787	1236551	195949	1237997	612	226	5.74	11.9	68.663	24.955	0.057096248	0.092511013	0.070146819	0.088105727	0.061990212	0.066079295	0.017944535	0.022026432	0.057096248	0.022026432	0.003262643	0	0.044045677	0.0969163	0.052202284	0.039647577	0.053833605	0.04845815	0.073409462	0.061674009	0.052202284	0.066079295	0.060358891	0.070484581	0.070146819	0.035242291	0.014681892	0	0.039151713	0.008810573	0.016313214	0	0.04730832
YPL184C_YCL031C	0	0	16	3	1	1	197787	65568	195949	64675	612	297	5.74	9.55	68.663	34.47	0.057096248	0.023489933	0.070146819	0.053691275	0.061990212	0.093959732	0.017944535	0.023489933	0.057096248	0.060402685	0.003262643	0.006711409	0.044045677	0.117449664	0.052202284	0.036912752	0.053833605	0.070469799	0.073409462	0.077181208	0.052202284	0.036912752	0.060358891	0.053691275	0.070146819	0.05033557	0.014681892	0.010067114	0.039151713	0.030201342	0.016313214	0.036912752	0.04730832
YPL184C_YIL040W	0	0	16	9	1	0	197787	277722	195949	278138	612	138	5.74	9.73	68.663	16.508	0.057096248	0.014388489	0.070146819	0.035971223	0.061990212	0.143884892	0.017944535	0.043165468	0.057096248	0.100719424	0.003262643	0.007194245	0.044045677	0.050359712	0.052202284	0.071942446	0.053833605	0.028776978	0.073409462	0.043165468	0.052202284	0.021582734	0.060358891	0.079136691	0.070146819	0.079136691	0.014681892	0.014388489	0.039151713	0.071942446	0.016313214	0.014388489	0.04730832
YPL184C_YNL115C	0	0	16	14	1	1	197787	412055	195949	410121	612	644	5.74	6.61	68.663	74.038	0.057096248	0.071317829	0.070146819	0.040310078	0.061990212	0.117829457	0.017944535	0.010852713	0.057096248	0.052713178	0.003262643	0.026356589	0.044045677	0.051162791	0.052202284	0.031007752	0.053833605	0.052713178	0.073409462	0.074418605	0.052202284	0.027906977	0.060358891	0.035658915	0.070146819	0.07751938	0.014681892	0.004651163	0.039151713	0.04496124	0.016313214	0.027906977	0.04730832
YPL184C_YKL182W	0	0	16	11	1	0	197787	100676	195949	106831	612	2051	5.74	5.79	68.663	228.689	0.057096248	0.065302144	0.070146819	0.062378168	0.061990212	0.087231969	0.017944535	0.020467836	0.057096248	0.054580897	0.003262643	0.011208577	0.044045677	0.067738791	0.052202284	0.035087719	0.053833605	0.066276803	0.073409462	0.071637427	0.052202284	0.053118908	0.060358891	0.078947368	0.070146819	0.066276803	0.014681892	0.007309942	0.039151713	0.030214425	0.016313214	0.019005848	0.04730832
YPL184C_YKL028W	0	0	16	11	1	0	197787	385401	195949	386849	612	482	5.74	4.22	68.663	54.741	0.057096248	0.033126294	0.070146819	0.076604555	0.061990212	0.080745342	0.017944535	0.020703934	0.057096248	0.022774327	0.003262643	0.004140787	0.044045677	0.070393375	0.052202284	0.045548654	0.053833605	0.124223602	0.073409462	0.057971014	0.052202284	0.043478261	0.060358891	0.047619048	0.070146819	0.047619048	0.014681892	0.008281573	0.039151713	0.026915114	0.016313214	0.014492754	0.04730832
YPL184C_YDR496C	0	0	16	4	1	1	197787	1443396	195949	1441426	612	656	5.74	6.88	68.663	75.105	0.057096248	0.04414003	0.070146819	0.053272451	0.061990212	0.112633181	0.017944535	0.01065449	0.057096248	0.0304414	0.003262643	0.00913242	0.044045677	0.108066971	0.052202284	0.03957382	0.053833605	0.105022831	0.073409462	0.083713851	0.052202284	0.02283105	0.060358891	0.051750381	0.070146819	0.070015221	0.014681892	0.00761035	0.039151713	0.02739726	0.016313214	0.02587519	0.04730832
YPL184C_YNL241C	0	0	16	14	1	1	197787	197944	195949	196427	612	505	5.74	6.24	68.663	57.521	0.057096248	0.063241107	0.070146819	0.057312253	0.061990212	0.088932806	0.017944535	0.02173913	0.057096248	0.053359684	0.003262643	0.009881423	0.044045677	0.084980237	0.052202284	0.029644269	0.053833605	0.075098814	0.073409462	0.059288538	0.052202284	0.057312253	0.060358891	0.07312253	0.070146819	0.053359684	0.014681892	0.001976285	0.039151713	0.041501976	0.016313214	0.019762846	0.04730832
YPL184C_YBR101C	0	0	16	2	1	1	197787	444687	195949	443815	612	290	5.74	4.76	68.663	32.604	0.057096248	0.041237113	0.070146819	0.068728522	0.061990212	0.144329897	0.017944535	0.027491409	0.057096248	0.030927835	0.003262643	0.006872852	0.044045677	0.082474227	0.052202284	0.030927835	0.053833605	0.075601375	0.073409462	0.068728522	0.052202284	0.034364261	0.060358891	0.048109966	0.070146819	0.075601375	0.014681892	0.006872852	0.039151713	0.020618557	0.016313214	0.013745704	0.04730832
YPL184C_YBR126C	0	0	16	2	1	1	197787	490386	195949	488899	612	495	5.74	6.02	68.663	56.147	0.057096248	0.0625	0.070146819	0.046370968	0.061990212	0.092741935	0.017944535	0.016129032	0.057096248	0.048387097	0.003262643	0.02016129	0.044045677	0.064516129	0.052202284	0.036290323	0.053833605	0.070564516	0.073409462	0.078629032	0.052202284	0.038306452	0.060358891	0.090725806	0.070146819	0.060483871	0.014681892	0.008064516	0.039151713	0.04233871	0.016313214	0.030241935	0.04730832
YPL184C_YDR337W	0	0	16	4	1	0	197787	1146314	195949	1147174	612	286	5.74	10.72	68.663	33.057	0.057096248	0.034843206	0.070146819	0.090592334	0.061990212	0.083623693	0.017944535	0.031358885	0.057096248	0.041811847	0.003262643	0.003484321	0.044045677	0.101045296	0.052202284	0.041811847	0.053833605	0.080139373	0.073409462	0.055749129	0.052202284	0.024390244	0.060358891	0.052264808	0.070146819	0.073170732	0.014681892	0.006968641	0.039151713	0.020905923	0.016313214	0.006968641	0.04730832
YPL184C_YOR321W	0	0	16	15	1	0	197787	916027	195949	918288	612	753	5.74	6.89	68.663	86.322	0.057096248	0.066312997	0.070146819	0.055702918	0.061990212	0.103448276	0.017944535	0.029177719	0.057096248	0.064986737	0.003262643	0.033156499	0.044045677	0.046419098	0.052202284	0.022546419	0.053833605	0.047745358	0.073409462	0.078249337	0.052202284	0.046419098	0.060358891	0.076923077	0.070146819	0.062334218	0.014681892	0.014588859	0.039151713	0.050397878	0.016313214	0.029177719	0.04730832
YPL184C_YDR482C	0	0	16	4	1	1	197787	1420831	195949	1420424	612	135	5.74	10.44	68.663	15.762	0.057096248	0.036764706	0.070146819	0.066176471	0.061990212	0.073529412	0.017944535	0.022058824	0.057096248	0	0.003262643	0.007352941	0.044045677	0.080882353	0.052202284	0.117647059	0.053833605	0.125	0.073409462	0.102941176	0.052202284	0.022058824	0.060358891	0.029411765	0.070146819	0.036764706	0.014681892	0.007352941	0.039151713	0.014705882	0.016313214	0.036764706	0.04730832
YPL184C_YML051W	0	0	16	13	1	0	197787	171594	195949	172901	612	435	5.74	8.16	68.663	48.323	0.057096248	0.073394495	0.070146819	0.068807339	0.061990212	0.091743119	0.017944535	0.02293578	0.057096248	0.04587156	0.003262643	0.006880734	0.044045677	0.055045872	0.052202284	0.041284404	0.053833605	0.048165138	0.073409462	0.084862385	0.052202284	0.048165138	0.060358891	0.05733945	0.070146819	0.087155963	0.014681892	0.004587156	0.039151713	0.050458716	0.016313214	0.02293578	0.04730832
YPL184C_YOR285W	0	0	16	15	1	0	197787	849634	195949	850053	612	139	5.74	6.35	68.663	15.413	0.057096248	0.071428571	0.070146819	0.064285714	0.061990212	0.05	0.017944535	0.028571429	0.057096248	0.028571429	0.003262643	0.021428571	0.044045677	0.071428571	0.052202284	0.028571429	0.053833605	0.057142857	0.073409462	0.121428571	0.052202284	0.064285714	0.060358891	0.078571429	0.070146819	0.057142857	0.014681892	0.007142857	0.039151713	0.042857143	0.016313214	0.035714286	0.04730832
YPL184C_YLR172C	0	0	16	12	1	1	197787	502164	195949	501262	612	300	5.74	4.66	68.663	33.847	0.057096248	0.059800664	0.070146819	0.073089701	0.061990212	0.106312292	0.017944535	0.019933555	0.057096248	0.029900332	0.003262643	0.013289037	0.044045677	0.059800664	0.052202284	0.033222591	0.053833605	0.096345515	0.073409462	0.073089701	0.052202284	0.03654485	0.060358891	0.059800664	0.070146819	0.066445183	0.014681892	0.016611296	0.039151713	0.046511628	0.016313214	0.019933555	0.04730832
YPL184C_YOR327C	0	0	16	15	1	1	197787	931078	195949	930731	612	115	5.74	9.28	68.663	12.957	0.057096248	0.043103448	0.070146819	0.068965517	0.061990212	0.068965517	0.017944535	0.043103448	0.057096248	0.025862069	0.003262643	0.017241379	0.044045677	0.060344828	0.052202284	0.034482759	0.053833605	0.051724138	0.073409462	0.077586207	0.052202284	0.051724138	0.060358891	0.103448276	0.070146819	0.086206897	0.014681892	0.00862069	0.039151713	0.017241379	0.016313214	0.00862069	0.04730832
YPL184C_YHR203C	0	0	16	8	1	1	197787	505530	195949	504476	612	261	5.74	10.9	68.663	29.41	0.057096248	0.091603053	0.070146819	0.057251908	0.061990212	0.095419847	0.017944535	0.011450382	0.057096248	0.034351145	0.003262643	0.003816794	0.044045677	0.103053435	0.052202284	0.019083969	0.053833605	0.034351145	0.073409462	0.030534351	0.052202284	0.045801527	0.060358891	0.08778626	0.070146819	0.061068702	0.014681892	0.003816794	0.039151713	0.034351145	0.016313214	0.038167939	0.04730832
YPL184C_YHR066W	0	0	16	8	1	0	197787	229337	195949	230698	612	453	5.74	10.05	68.663	51.764	0.057096248	0.04185022	0.070146819	0.046255507	0.061990212	0.085903084	0.017944535	0.024229075	0.057096248	0.028634361	0.003262643	0	0.044045677	0.121145374	0.052202284	0.04845815	0.053833605	0.0969163	0.073409462	0.081497797	0.052202284	0.044052863	0.060358891	0.066079295	0.070146819	0.050660793	0.014681892	0.004405286	0.039151713	0.011013216	0.016313214	0.026431718	0.04730832
YPL184C_YHR083W	0	0	16	8	1	0	197787	272629	195949	273618	612	329	5.74	7.13	68.663	37.404	0.057096248	0.036363636	0.070146819	0.051515152	0.061990212	0.124242424	0.017944535	0.024242424	0.057096248	0.042424242	0.003262643	0.006060606	0.044045677	0.066666667	0.052202284	0.063636364	0.053833605	0.063636364	0.073409462	0.078787879	0.052202284	0.033333333	0.060358891	0.075757576	0.070146819	0.054545455	0.014681892	0.024242424	0.039151713	0.036363636	0.016313214	0.024242424	0.04730832
YPL184C_YMR225C	0	0	16	13	1	1	197787	721402	195949	720959	612	98	5.74	10.38	68.663	11.476	0.057096248	0.02020202	0.070146819	0.050505051	0.061990212	0.070707071	0.017944535	0.060606061	0.057096248	0.050505051	0.003262643	0	0.044045677	0.121212121	0.052202284	0.050505051	0.053833605	0.060606061	0.073409462	0.050505051	0.052202284	0.050505051	0.060358891	0.080808081	0.070146819	0.060606061	0.014681892	0	0.039151713	0.03030303	0.016313214	0.04040404	0.04730832
YPL184C_YHR193C	0	0	16	8	1	1	197787	488236	195949	487712	612	174	5.74	4.67	68.663	18.709	0.057096248	0.062857143	0.070146819	0.137142857	0.061990212	0.057142857	0.017944535	0.022857143	0.057096248	0.022857143	0.003262643	0	0.044045677	0.091428571	0.052202284	0.068571429	0.053833605	0.085714286	0.073409462	0.051428571	0.052202284	0.028571429	0.060358891	0.08	0.070146819	0.068571429	0.014681892	0	0.039151713	0.011428571	0.016313214	0.005714286	0.04730832
YPL184C_YOR095C	0	0	16	15	1	1	197787	504329	195949	503553	612	258	5.74	5.77	68.663	28.258	0.057096248	0.084942085	0.070146819	0.081081081	0.061990212	0.081081081	0.017944535	0.003861004	0.057096248	0.042471042	0.003262643	0.003861004	0.044045677	0.081081081	0.052202284	0.034749035	0.053833605	0.065637066	0.073409462	0.065637066	0.052202284	0.038610039	0.060358891	0.084942085	0.070146819	0.081081081	0.014681892	0.007722008	0.039151713	0.027027027	0.016313214	0.019305019	0.04730832
YPL184C_YDR225W	0	0	16	4	1	0	197787	915527	195949	915925	612	132	5.74	11.43	68.663	13.989	0.057096248	0.105263158	0.070146819	0.142857143	0.061990212	0.127819549	0.017944535	0.007518797	0.057096248	0.007518797	0.003262643	0	0.044045677	0.082706767	0.052202284	0.045112782	0.053833605	0.037593985	0.073409462	0.060150376	0.052202284	0.037593985	0.060358891	0.045112782	0.070146819	0.052631579	0.014681892	0	0.039151713	0.022556391	0.016313214	0.022556391	0.04730832
YPL184C_YIL154C	0	0	16	9	1	1	197787	55021	195949	53981	612	346	5.74	4.78	68.663	39.07	0.057096248	0.057636888	0.070146819	0.043227666	0.061990212	0.095100865	0.017944535	0.028818444	0.057096248	0.023054755	0.003262643	0.008645533	0.044045677	0.057636888	0.052202284	0.031700288	0.053833605	0.095100865	0.073409462	0.100864553	0.052202284	0.031700288	0.060358891	0.077809798	0.070146819	0.043227666	0.014681892	0.014409222	0.039151713	0.023054755	0.016313214	0.028818444	0.04730832
YPL184C_YGL023C	0	0	16	7	1	1	197787	452109	195949	450202	612	635	5.74	7.76	68.663	70.616	0.057096248	0.048742138	0.070146819	0.045597484	0.061990212	0.066037736	0.017944535	0.012578616	0.057096248	0.023584906	0.003262643	0.007861635	0.044045677	0.073899371	0.052202284	0.045597484	0.053833605	0.062893082	0.073409462	0.136792453	0.052202284	0.044025157	0.060358891	0.047169811	0.070146819	0.050314465	0.014681892	0.012578616	0.039151713	0.017295597	0.016313214	0.028301887	0.04730832
YPL184C_YOR320C	0	0	16	15	1	1	197787	915091	195949	913616	612	491	5.74	8.72	68.663	57.577	0.057096248	0.022357724	0.070146819	0.036585366	0.061990212	0.117886179	0.017944535	0.014227642	0.057096248	0.054878049	0.003262643	0.010162602	0.044045677	0.093495935	0.052202284	0.034552846	0.053833605	0.058943089	0.073409462	0.075203252	0.052202284	0.040650407	0.060358891	0.06300813	0.070146819	0.085365854	0.014681892	0.008130081	0.039151713	0.058943089	0.016313214	0.018292683	0.04730832
YPL184C_YER063W	0	0	16	5	1	0	197787	281708	195949	282364	612	218	5.74	7.54	68.663	24.137	0.057096248	0.054794521	0.070146819	0.082191781	0.061990212	0.082191781	0.017944535	0.00456621	0.057096248	0.01369863	0.003262643	0	0.044045677	0.105022831	0.052202284	0.059360731	0.053833605	0.118721461	0.073409462	0.100456621	0.052202284	0.0456621	0.060358891	0.050228311	0.070146819	0.02739726	0.014681892	0	0.039151713	0.00913242	0.016313214	0.00456621	0.04730832
YPL184C_YBR135W	0	0	16	2	1	0	197787	504848	195949	505300	612	150	5.74	6.42	68.663	17.795	0.057096248	0.033112583	0.070146819	0.066225166	0.061990212	0.079470199	0.017944535	0.026490066	0.057096248	0.026490066	0.003262643	0.013245033	0.044045677	0.026490066	0.052202284	0.158940397	0.053833605	0.072847682	0.073409462	0.059602649	0.052202284	0.052980132	0.060358891	0.033112583	0.070146819	0.046357616	0.014681892	0.006622517	0.039151713	0.059602649	0.016313214	0.059602649	0.04730832
YPL184C_YDR167W	0	0	16	4	1	0	197787	789447	195949	790067	612	206	5.74	4.28	68.663	23.019	0.057096248	0.048309179	0.070146819	0.09178744	0.061990212	0.057971014	0.017944535	0.019323671	0.057096248	0.038647343	0.003262643	0	0.044045677	0.057971014	0.052202284	0.082125604	0.053833605	0.072463768	0.073409462	0.06763285	0.052202284	0.038647343	0.060358891	0.077294686	0.070146819	0.043478261	0.014681892	0	0.039151713	0.033816425	0.016313214	0.004830918	0.04730832
YPL184C_YIL106W	0	0	16	9	1	0	197787	166412	195949	167441	612	314	5.74	6.57	68.663	35.882	0.057096248	0.047619048	0.070146819	0.053968254	0.061990212	0.079365079	0.017944535	0.022222222	0.057096248	0.063492063	0.003262643	0.012698413	0.044045677	0.028571429	0.052202284	0.063492063	0.053833605	0.06031746	0.073409462	0.050793651	0.052202284	0.073015873	0.060358891	0.057142857	0.070146819	0.044444444	0.014681892	0.022222222	0.039151713	0.028571429	0.016313214	0.034920635	0.04730832
YPL184C_YLR084C	0	0	16	12	1	1	197787	300252	195949	296590	612	1220	5.74	4.26	68.663	133.958	0.057096248	0.063063063	0.070146819	0.046683047	0.061990212	0.101556102	0.017944535	0.013923014	0.057096248	0.047502048	0.003262643	0.011466011	0.044045677	0.033579034	0.052202284	0.036855037	0.053833605	0.042588043	0.073409462	0.13022113	0.052202284	0.034398034	0.060358891	0.058149058	0.070146819	0.068796069	0.014681892	0.008190008	0.039151713	0.046683047	0.016313214	0.004914005	0.04730832
YPL184C_YER134C	0	0	16	5	1	1	197787	437799	195949	437263	612	178	5.74	6.75	68.663	20.441	0.057096248	0.072625698	0.070146819	0.039106145	0.061990212	0.094972067	0.017944535	0.011173184	0.057096248	0.039106145	0.003262643	0.022346369	0.044045677	0.100558659	0.052202284	0.016759777	0.053833605	0.055865922	0.073409462	0.05027933	0.052202284	0.05027933	0.060358891	0.067039106	0.070146819	0.061452514	0.014681892	0.022346369	0.039151713	0.061452514	0.016313214	0.016759777	0.04730832
YPL184C_YDR297W	0	0	16	4	1	0	197787	1056548	195949	1057597	612	349	5.74	8.95	68.663	40.734	0.057096248	0.048571429	0.070146819	0.085714286	0.061990212	0.097142857	0.017944535	0.04	0.057096248	0.088571429	0.003262643	0.017142857	0.044045677	0.071428571	0.052202284	0.034285714	0.053833605	0.062857143	0.073409462	0.028571429	0.052202284	0.042857143	0.060358891	0.051428571	0.070146819	0.057142857	0.014681892	0.002857143	0.039151713	0.048571429	0.016313214	0.051428571	0.04730832
YPL184C_YPL163C	0	0	16	16	1	1	197787	242699	195949	241917	612	260	5.74	3.95	68.663	27.611	0.057096248	0.01532567	0.070146819	0.095785441	0.061990212	0.057471264	0.017944535	0.007662835	0.057096248	0.019157088	0.003262643	0.003831418	0.044045677	0.022988506	0.052202284	0.030651341	0.053833605	0.053639847	0.073409462	0.149425287	0.052202284	0.026819923	0.060358891	0.068965517	0.070146819	0.049808429	0.014681892	0.007662835	0.039151713	0.0651341	0.016313214	0.007662835	0.04730832
YPL184C_YGL038C	0	0	16	7	1	1	197787	426810	195949	425368	612	480	5.74	7.85	68.663	55.155	0.057096248	0.035343035	0.070146819	0.03950104	0.061990212	0.091476091	0.017944535	0.024948025	0.057096248	0.045738046	0.003262643	0.022869023	0.044045677	0.079002079	0.052202284	0.043659044	0.053833605	0.037422037	0.073409462	0.106029106	0.052202284	0.062370062	0.060358891	0.045738046	0.070146819	0.072765073	0.014681892	0.002079002	0.039151713	0.037422037	0.016313214	0.022869023	0.04730832
YPL184C_YCL064C	0	0	16	3	1	1	197787	16880	195949	15798	612	360	5.74	9.01	68.663	39.301	0.057096248	0.077562327	0.070146819	0.074792244	0.061990212	0.063711911	0.017944535	0.019390582	0.057096248	0.041551247	0.003262643	0.005540166	0.044045677	0.08033241	0.052202284	0.041551247	0.053833605	0.04432133	0.073409462	0.074792244	0.052202284	0.038781163	0.060358891	0.08033241	0.070146819	0.096952909	0.014681892	0.022160665	0.039151713	0.027700831	0.016313214	0.016620499	0.04730832
YPL184C_YLR093C	0	0	16	12	1	1	197787	327416	195949	326514	612	253	5.74	5.43	68.663	28.964	0.057096248	0.043307087	0.070146819	0.023622047	0.061990212	0.078740157	0.017944535	0.035433071	0.057096248	0.059055118	0.003262643	0.011811024	0.044045677	0.066929134	0.052202284	0.051181102	0.053833605	0.05511811	0.073409462	0.086614173	0.052202284	0.027559055	0.060358891	0.07480315	0.070146819	0.090551181	0.014681892	0.011811024	0.039151713	0.027559055	0.016313214	0.015748031	0.04730832
YPL184C_YOR341W	0	0	16	15	1	0	197787	960984	195949	965978	612	1664	5.74	7.05	68.663	186.43	0.057096248	0.057657658	0.070146819	0.061861862	0.061990212	0.085885886	0.017944535	0.025825826	0.057096248	0.036636637	0.003262643	0.004804805	0.044045677	0.078078078	0.052202284	0.039039039	0.053833605	0.066666667	0.073409462	0.079279279	0.052202284	0.038438438	0.060358891	0.069069069	0.070146819	0.055255255	0.014681892	0.014414414	0.039151713	0.032432432	0.016313214	0.022222222	0.04730832
YPL184C_YOL038W	0	0	16	15	1	0	197787	255336	195949	256100	612	254	5.74	7.37	68.663	28.439	0.057096248	0.058823529	0.070146819	0.050980392	0.061990212	0.070588235	0.017944535	0.003921569	0.057096248	0.023529412	0.003262643	0.003921569	0.044045677	0.074509804	0.052202284	0.062745098	0.053833605	0.08627451	0.073409462	0.090196078	0.052202284	0.039215686	0.060358891	0.101960784	0.070146819	0.054901961	0.014681892	0.015686275	0.039151713	0.035294118	0.016313214	0.015686275	0.04730832
YPL184C_YGL009C	0	0	16	7	1	1	197787	478657	195949	476318	612	779	5.74	5.74	68.663	85.794	0.057096248	0.080769231	0.070146819	0.078205128	0.061990212	0.074358974	0.017944535	0.019230769	0.057096248	0.042307692	0.003262643	0.01025641	0.044045677	0.076923077	0.052202284	0.033333333	0.053833605	0.070512821	0.073409462	0.06025641	0.052202284	0.051282051	0.060358891	0.061538462	0.070146819	0.070512821	0.014681892	0.014102564	0.039151713	0.021794872	0.016313214	0.021794872	0.04730832
YPL184C_YMR246W	0	0	16	13	1	0	197787	759806	195949	761890	612	694	5.74	6.52	68.663	77.267	0.057096248	0.082014388	0.070146819	0.067625899	0.061990212	0.083453237	0.017944535	0.020143885	0.057096248	0.037410072	0.003262643	0.015827338	0.044045677	0.083453237	0.052202284	0.020143885	0.053833605	0.076258993	0.073409462	0.043165468	0.052202284	0.046043165	0.060358891	0.071942446	0.070146819	0.084892086	0.014681892	0.017266187	0.039151713	0.035971223	0.016313214	0.020143885	0.04730832
YPL184C_YHR206W	0	1	16	8	1	0	197787	512732	195949	514600	612	622	5.74	7.04	68.663	69.202	0.057096248	0.041733547	0.070146819	0.052969502	0.061990212	0.09470305	0.017944535	0.02247191	0.057096248	0.033707865	0.003262643	0.003210273	0.044045677	0.048154093	0.052202284	0.06741573	0.053833605	0.046548957	0.073409462	0.08988764	0.052202284	0.054574639	0.060358891	0.048154093	0.070146819	0.051364366	0.014681892	0.008025682	0.039151713	0.017656501	0.016313214	0.030497592	0.04730832
YPL184C_YPL075W	0	0	16	16	1	0	197787	412251	195949	415359	612	785	5.74	8.5	68.663	87.728	0.057096248	0.041984733	0.070146819	0.03562341	0.061990212	0.092875318	0.017944535	0.012722646	0.057096248	0.041984733	0.003262643	0.008905852	0.044045677	0.069974555	0.052202284	0.047073791	0.053833605	0.055979644	0.073409462	0.128498728	0.052202284	0.071246819	0.060358891	0.044529262	0.070146819	0.066157761	0.014681892	0.008905852	0.039151713	0.025445293	0.016313214	0.011450382	0.04730832
YPL184C_YLR163C	0	0	16	12	1	1	197787	493256	195949	491868	612	462	5.74	7.04	68.663	51.083	0.057096248	0.062634989	0.070146819	0.075593952	0.061990212	0.079913607	0.017944535	0.01511879	0.057096248	0.025917927	0.003262643	0.010799136	0.044045677	0.062634989	0.052202284	0.034557235	0.053833605	0.064794816	0.073409462	0.088552916	0.052202284	0.041036717	0.060358891	0.071274298	0.070146819	0.07775378	0.014681892	0.002159827	0.039151713	0.034557235	0.016313214	0.019438445	0.04730832
YPL184C_YBR002C	0	0	16	2	1	1	197787	242570	195949	241710	612	286	5.74	7.79	68.663	32.693	0.057096248	0.06271777	0.070146819	0.055749129	0.061990212	0.104529617	0.017944535	0.024390244	0.057096248	0.048780488	0.003262643	0.013937282	0.044045677	0.073170732	0.052202284	0.010452962	0.053833605	0.094076655	0.073409462	0.073170732	0.052202284	0.027874564	0.060358891	0.055749129	0.070146819	0.069686411	0.014681892	0.017421603	0.039151713	0.020905923	0.016313214	0.024390244	0.04730832
YPL184C_YDR119W	0	0	16	4	1	0	197787	688225	195949	690531	612	768	5.74	8.23	68.663	85.682	0.057096248	0.052015605	0.070146819	0.049414824	0.061990212	0.120936281	0.017944535	0.027308192	0.057096248	0.062418726	0.003262643	0.011703511	0.044045677	0.055916775	0.052202284	0.036410923	0.053833605	0.040312094	0.073409462	0.122236671	0.052202284	0.042912874	0.060358891	0.062418726	0.070146819	0.078023407	0.014681892	0.022106632	0.039151713	0.028608583	0.016313214	0.019505852	0.04730832
YPL184C_YLL051C	0	0	16	12	1	1	197787	39470	195949	37332	612	712	5.74	9.37	68.663	81.988	0.057096248	0.043478261	0.070146819	0.051893408	0.061990212	0.116409537	0.017944535	0.011220196	0.057096248	0.07713885	0.003262643	0.021037868	0.044045677	0.053295933	0.052202284	0.022440393	0.053833605	0.036465638	0.073409462	0.086956522	0.052202284	0.039270687	0.060358891	0.056100982	0.070146819	0.093969144	0.014681892	0.018232819	0.039151713	0.043478261	0.016313214	0.040673212	0.04730832
YPL184C_YLR016C	0	0	16	12	1	1	197787	177415	195949	176801	612	204	5.74	4.97	68.663	23.653	0.057096248	0.063414634	0.070146819	0.024390244	0.061990212	0.092682927	0.017944535	0.034146341	0.057096248	0.029268293	0.003262643	0.004878049	0.044045677	0.058536585	0.052202284	0.019512195	0.053833605	0.073170732	0.073409462	0.063414634	0.052202284	0.03902439	0.060358891	0.058536585	0.070146819	0.063414634	0.014681892	0.019512195	0.039151713	0.053658537	0.016313214	0.024390244	0.04730832
YPL184C_YIL135C	0	0	16	9	1	1	197787	96375	195949	95065	612	436	5.74	10.01	68.663	47.961	0.057096248	0.034324943	0.070146819	0.057208238	0.061990212	0.061784897	0.017944535	0.029748284	0.057096248	0.029748284	0.003262643	0	0.044045677	0.029748284	0.052202284	0.041189931	0.053833605	0.029748284	0.073409462	0.176201373	0.052202284	0.073226545	0.060358891	0.027459954	0.070146819	0.032036613	0.014681892	0.00228833	0.039151713	0.025171625	0.016313214	0.034324943	0.04730832
YPL184C_YPR063C	0	0	16	16	1	1	197787	678317	195949	677809	612	140	5.74	7.1	68.663	15.441	0.057096248	0.035460993	0.070146819	0.078014184	0.061990212	0.070921986	0.017944535	0.042553191	0.057096248	0.035460993	0.003262643	0.007092199	0.044045677	0.063829787	0.052202284	0.04964539	0.053833605	0.04964539	0.073409462	0.092198582	0.052202284	0.078014184	0.060358891	0.063829787	0.070146819	0.078014184	0.014681892	0.021276596	0.039151713	0.042553191	0.016313214	0.007092199	0.04730832
YPL184C_YGR124W	0	0	16	7	1	0	197787	739949	195949	741667	612	572	5.74	5.73	68.663	64.593	0.057096248	0.059336824	0.070146819	0.092495637	0.061990212	0.078534031	0.017944535	0.02443281	0.057096248	0.043630017	0.003262643	0.019197208	0.044045677	0.066317627	0.052202284	0.027923211	0.053833605	0.062827225	0.073409462	0.062827225	0.052202284	0.05061082	0.060358891	0.047120419	0.070146819	0.066317627	0.014681892	0.015706806	0.039151713	0.038394415	0.016313214	0.034904014	0.04730832
YPL184C_YDR041W	0	0	16	4	1	0	197787	539801	195949	540412	612	203	5.74	10.1	68.663	23.424	0.057096248	0.044117647	0.070146819	0.053921569	0.061990212	0.117647059	0.017944535	0.019607843	0.057096248	0.039215686	0.003262643	0.009803922	0.044045677	0.078431373	0.052202284	0.029411765	0.053833605	0.053921569	0.073409462	0.073529412	0.052202284	0.053921569	0.060358891	0.049019608	0.070146819	0.058823529	0.014681892	0.004901961	0.039151713	0.049019608	0.016313214	0.024509804	0.04730832
YPL184C_YNL281W	0	0	16	14	1	0	197787	108467	195949	108928	612	153	5.74	4.4	68.663	17.246	0.057096248	0.051948052	0.070146819	0.012987013	0.061990212	0.103896104	0.017944535	0.019480519	0.057096248	0.032467532	0.003262643	0.019480519	0.044045677	0.090909091	0.052202284	0.038961039	0.053833605	0.051948052	0.073409462	0.097402597	0.052202284	0.038961039	0.060358891	0.084415584	0.070146819	0.058441558	0.014681892	0.006493506	0.039151713	0.019480519	0.016313214	0.019480519	0.04730832
YPL184C_YJL190C	0	0	16	10	1	1	197787	75301	195949	74909	612	130	5.74	10.76	68.663	14.626	0.057096248	0.083969466	0.070146819	0.061068702	0.061990212	0.076335878	0.017944535	0.022900763	0.057096248	0.038167939	0.003262643	0.007633588	0.044045677	0.083969466	0.052202284	0.038167939	0.053833605	0.045801527	0.073409462	0.061068702	0.052202284	0.022900763	0.060358891	0.083969466	0.070146819	0.099236641	0.014681892	0.007633588	0.039151713	0.030534351	0.016313214	0.030534351	0.04730832
YPL184C_YPR056W	0	0	16	16	1	0	197787	671123	195949	672139	612	338	5.74	9.04	68.663	37.457	0.057096248	0.044247788	0.070146819	0.067846608	0.061990212	0.085545723	0.017944535	0.017699115	0.057096248	0.038348083	0.003262643	0.002949853	0.044045677	0.088495575	0.052202284	0.029498525	0.053833605	0.064896755	0.073409462	0.097345133	0.052202284	0.044247788	0.060358891	0.076696165	0.070146819	0.08259587	0.014681892	0.026548673	0.039151713	0.029498525	0.016313214	0.014749263	0.04730832
YPL184C_YLR204W	0	0	16	12	1	0	197787	552272	195949	552607	612	111	5.74	12.42	68.663	12.772	0.057096248	0.071428571	0.070146819	0.044642857	0.061990212	0.071428571	0.017944535	0.098214286	0.057096248	0.017857143	0.003262643	0.008928571	0.044045677	0.116071429	0.052202284	0.035714286	0.053833605	0.035714286	0.073409462	0.0625	0.052202284	0.044642857	0.060358891	0.044642857	0.070146819	0.035714286	0.014681892	0.008928571	0.039151713	0.008928571	0.016313214	0.008928571	0.04730832
YPL184C_YJL179W	0	0	16	10	1	0	197787	88785	195949	89114	612	109	5.74	9.93	68.663	12.738	0.057096248	0.009090909	0.070146819	0.054545455	0.061990212	0.136363636	0.017944535	0.036363636	0.057096248	0.009090909	0.003262643	0.009090909	0.044045677	0.127272727	0.052202284	0.072727273	0.053833605	0.072727273	0.073409462	0.063636364	0.052202284	0.009090909	0.060358891	0.054545455	0.070146819	0.036363636	0.014681892	0.009090909	0.039151713	0.036363636	0.016313214	0.009090909	0.04730832
YPL184C_YGR232W	0	0	16	7	1	0	197787	953963	195949	954649	612	228	5.74	6.42	68.663	25.616	0.057096248	0.061135371	0.070146819	0.069868996	0.061990212	0.131004367	0.017944535	0.013100437	0.057096248	0.048034934	0.003262643	0.021834061	0.044045677	0.082969432	0.052202284	0.048034934	0.053833605	0.061135371	0.073409462	0.065502183	0.052202284	0.03930131	0.060358891	0.07860262	0.070146819	0.034934498	0.014681892	0.017467249	0.039151713	0.021834061	0.016313214	0.03930131	0.04730832
YPL184C_YML103C	0	0	16	13	1	1	197787	67549	195949	62582	612	1655	5.74	5.36	68.663	188.575	0.057096248	0.024758454	0.070146819	0.03442029	0.061990212	0.147342995	0.017944535	0.010869565	0.057096248	0.060990338	0.003262643	0.007246377	0.044045677	0.070652174	0.052202284	0.047705314	0.053833605	0.053743961	0.073409462	0.106884058	0.052202284	0.028985507	0.060358891	0.048913043	0.070146819	0.096618357	0.014681892	0.007246377	0.039151713	0.028985507	0.016313214	0.016304348	0.04730832
YPL184C_YHL020C	0	0	16	8	1	1	197787	67453	195949	66239	612	404	5.74	4.87	68.663	46.065	0.057096248	0.032098765	0.070146819	0.04691358	0.061990212	0.088888889	0.017944535	0.017283951	0.057096248	0.022222222	0.003262643	0.004938272	0.044045677	0.086419753	0.052202284	0.116049383	0.053833605	0.086419753	0.073409462	0.098765432	0.052202284	0.027160494	0.060358891	0.074074074	0.070146819	0.02962963	0.014681892	0.009876543	0.039151713	0.019753086	0.016313214	0.019753086	0.04730832
YPL184C_YOL004W	0	0	16	15	1	0	197787	316939	195949	321549	612	1536	5.74	5.42	68.663	174.838	0.057096248	0.038386467	0.070146819	0.055953155	0.061990212	0.079375407	0.017944535	0.015614834	0.057096248	0.039687703	0.003262643	0.009108653	0.044045677	0.068314899	0.052202284	0.075471698	0.053833605	0.07807417	0.073409462	0.085881588	0.052202284	0.063760573	0.060358891	0.044892648	0.070146819	0.061808718	0.014681892	0.005855563	0.039151713	0.031880286	0.016313214	0.03057905	0.04730832
YPL184C_YNL056W	0	0	16	14	1	0	197787	517250	195949	517843	612	197	5.74	6.63	68.663	22.472	0.057096248	0.075757576	0.070146819	0.025252525	0.061990212	0.101010101	0.017944535	0.03030303	0.057096248	0.04040404	0.003262643	0.005050505	0.044045677	0.065656566	0.052202284	0.035353535	0.053833605	0.070707071	0.073409462	0.080808081	0.052202284	0.050505051	0.060358891	0.065656566	0.070146819	0.085858586	0.014681892	0.01010101	0.039151713	0.055555556	0.016313214	0.035353535	0.04730832
YPL184C_YJR103W	0	0	16	10	1	0	197787	620743	195949	622437	612	564	5.74	6.02	68.663	63.056	0.057096248	0.083185841	0.070146819	0.044247788	0.061990212	0.100884956	0.017944535	0.024778761	0.057096248	0.028318584	0.003262643	0.012389381	0.044045677	0.056637168	0.052202284	0.030088496	0.053833605	0.077876106	0.073409462	0.063716814	0.052202284	0.046017699	0.060358891	0.083185841	0.070146819	0.069026549	0.014681892	0.014159292	0.039151713	0.030088496	0.016313214	0.03539823	0.04730832
YPL184C_YAL029C	0	0	16	1	1	1	197787	92271	195949	87856	612	1471	5.74	7.63	68.663	169.342	0.057096248	0.042798913	0.070146819	0.05298913	0.061990212	0.108016304	0.017944535	0.022418478	0.057096248	0.046875	0.003262643	0.010190217	0.044045677	0.081521739	0.052202284	0.046195652	0.053833605	0.078125	0.073409462	0.070652174	0.052202284	0.029891304	0.060358891	0.05298913	0.070146819	0.081521739	0.014681892	0.010190217	0.039151713	0.039402174	0.016313214	0.017663043	0.04730832
YPL184C_YOR039W	0	0	16	15	1	0	197787	405768	195949	406544	612	258	5.74	5.94	68.663	29.842	0.057096248	0.061776062	0.070146819	0.027027027	0.061990212	0.1003861	0.017944535	0.030888031	0.057096248	0.046332046	0.003262643	0.007722008	0.044045677	0.073359073	0.052202284	0.046332046	0.053833605	0.057915058	0.073409462	0.073359073	0.052202284	0.042471042	0.060358891	0.065637066	0.070146819	0.05019305	0.014681892	0.023166023	0.039151713	0.054054054	0.016313214	0.027027027	0.04730832
YPL184C_YOR150W	0	0	16	15	1	0	197787	612000	195949	612491	612	163	5.74	10.91	68.663	18.463	0.057096248	0.073170732	0.070146819	0.06097561	0.061990212	0.085365854	0.017944535	0.018292683	0.057096248	0.036585366	0.003262643	0.012195122	0.044045677	0.115853659	0.052202284	0.06097561	0.053833605	0.036585366	0.073409462	0.067073171	0.052202284	0.042682927	0.060358891	0.067073171	0.070146819	0.054878049	0.014681892	0.012195122	0.039151713	0.024390244	0.016313214	0.042682927	0.04730832
YPL184C_YER118C	0	0	16	5	1	1	197787	399051	195949	397948	612	367	5.74	5.44	68.663	41.125	0.057096248	0.057065217	0.070146819	0.078804348	0.061990212	0.057065217	0.017944535	0.016304348	0.057096248	0.046195652	0.003262643	0.019021739	0.044045677	0.032608696	0.052202284	0.035326087	0.053833605	0.035326087	0.073409462	0.100543478	0.052202284	0.043478261	0.060358891	0.035326087	0.070146819	0.089673913	0.014681892	0.005434783	0.039151713	0.051630435	0.016313214	0.016304348	0.04730832
YPL184C_YOL012C	0	0	16	15	1	1	197787	303984	195949	303580	612	134	5.74	11.41	68.663	14.283	0.057096248	0.111111111	0.070146819	0.118518519	0.061990212	0.125925926	0.017944535	0.007407407	0.057096248	0.007407407	0.003262643	0	0.044045677	0.118518519	0.052202284	0.022222222	0.053833605	0.037037037	0.073409462	0.088888889	0.052202284	0.022222222	0.060358891	0.051851852	0.070146819	0.051851852	0.014681892	0	0.039151713	0.022222222	0.016313214	0.02962963	0.04730832
YPL184C_YLR018C	0	0	16	12	1	1	197787	179605	195949	178706	612	299	5.74	10.62	68.663	34.232	0.057096248	0.04	0.070146819	0.036666667	0.061990212	0.12	0.017944535	0.033333333	0.057096248	0.046666667	0.003262643	0.013333333	0.044045677	0.076666667	0.052202284	0.063333333	0.053833605	0.03	0.073409462	0.093333333	0.052202284	0.05	0.060358891	0.046666667	0.070146819	0.046666667	0.014681892	0.003333333	0.039151713	0.026666667	0.016313214	0.04	0.04730832
YPL184C_YBR016W	0	0	16	2	1	0	197787	270247	195949	270633	612	128	5.74	7.25	68.663	14.617	0.057096248	0.108527132	0.070146819	0.054263566	0.061990212	0.031007752	0.017944535	0.023255814	0.057096248	0.007751938	0.003262643	0	0.044045677	0.015503876	0.052202284	0.255813953	0.053833605	0.023255814	0.073409462	0.046511628	0.052202284	0.07751938	0.060358891	0.015503876	0.070146819	0.007751938	0.014681892	0.03875969	0.039151713	0.11627907	0.016313214	0.023255814	0.04730832
YPL184C_YGL195W	0	0	16	7	1	0	197787	131531	195949	139549	612	2672	5.74	5.02	68.663	296.695	0.057096248	0.046015713	0.070146819	0.081556304	0.061990212	0.128694351	0.017944535	0.013842125	0.057096248	0.047138047	0.003262643	0.005611672	0.044045677	0.064721287	0.052202284	0.032547699	0.053833605	0.077815189	0.073409462	0.077815189	0.052202284	0.03778526	0.060358891	0.069958848	0.070146819	0.081930415	0.014681892	0.009726899	0.039151713	0.019079686	0.016313214	0.013093902	0.04730832
YPL184C_YGL127C	0	0	16	7	1	1	197787	270781	195949	270398	612	127	5.74	4.26	68.663	14.741	0.057096248	0.0390625	0.070146819	0.0390625	0.061990212	0.125	0.017944535	0.03125	0.057096248	0.0390625	0.003262643	0.03125	0.044045677	0.0390625	0.052202284	0.078125	0.053833605	0.078125	0.073409462	0.0625	0.052202284	0.078125	0.060358891	0.0390625	0.070146819	0.0625	0.014681892	0.0234375	0.039151713	0.0546875	0.016313214	0	0.04730832
YPL184C_YDR529C	0	0	16	4	1	1	197787	1496541	195949	1496158	612	127	5.74	5.76	68.663	14.565	0.057096248	0.0234375	0.070146819	0.1015625	0.061990212	0.125	0.017944535	0.015625	0.057096248	0.0234375	0.003262643	0.0078125	0.044045677	0.0703125	0.052202284	0.0390625	0.053833605	0.09375	0.073409462	0.046875	0.052202284	0.0625	0.060358891	0.0390625	0.070146819	0.0859375	0.014681892	0.0078125	0.039151713	0.046875	0.016313214	0.0234375	0.04730832
YPL184C_YMR153W	0	0	16	13	1	0	197787	564434	195949	565861	612	475	5.74	10.33	68.663	52.618	0.057096248	0.052521008	0.070146819	0.06092437	0.061990212	0.075630252	0.017944535	0.008403361	0.057096248	0.048319328	0.003262643	0.014705882	0.044045677	0.096638655	0.052202284	0.042016807	0.053833605	0.054621849	0.073409462	0.132352941	0.052202284	0.056722689	0.060358891	0.033613445	0.070146819	0.056722689	0.014681892	0.00210084	0.039151713	0.012605042	0.016313214	0.010504202	0.04730832
YPL184C_YJR057W	0	0	16	10	1	0	197787	544054	195949	544704	612	216	5.74	5.49	68.663	24.687	0.057096248	0.069124424	0.070146819	0.032258065	0.061990212	0.115207373	0.017944535	0.023041475	0.057096248	0.046082949	0.003262643	0.013824885	0.044045677	0.096774194	0.052202284	0.046082949	0.053833605	0.064516129	0.073409462	0.050691244	0.052202284	0.023041475	0.060358891	0.059907834	0.070146819	0.073732719	0.014681892	0.013824885	0.039151713	0.02764977	0.016313214	0.013824885	0.04730832
YPL184C_YMR186W	0	0	16	13	1	0	197787	632354	195949	634471	612	705	5.74	4.59	68.663	80.899	0.057096248	0.035410765	0.070146819	0.062322946	0.061990212	0.09631728	0.017944535	0.018413598	0.057096248	0.04815864	0.003262643	0.007082153	0.044045677	0.103399433	0.052202284	0.031161473	0.053833605	0.135977337	0.073409462	0.063739377	0.052202284	0.038243626	0.060358891	0.059490085	0.070146819	0.066572238	0.014681892	0	0.039151713	0.026912181	0.016313214	0.005665722	0.04730832
YPL184C_YML124C	0	0	16	13	1	1	197787	23684	195949	22049	612	445	5.74	4.92	68.663	49.694	0.057096248	0.080717489	0.070146819	0.067264574	0.061990212	0.078475336	0.017944535	0.020179372	0.057096248	0.044843049	0.003262643	0.00896861	0.044045677	0.051569507	0.052202284	0.029147982	0.053833605	0.089686099	0.073409462	0.062780269	0.052202284	0.040358744	0.060358891	0.076233184	0.070146819	0.051569507	0.014681892	0.024663677	0.039151713	0.042600897	0.016313214	0.024663677	0.04730832
YPL184C_YPR138C	0	0	16	16	1	1	197787	812449	195949	810980	612	489	5.74	6.49	68.663	53.689	0.057096248	0.097959184	0.070146819	0.097959184	0.061990212	0.097959184	0.017944535	0.028571429	0.057096248	0.053061224	0.003262643	0.034693878	0.044045677	0.036734694	0.052202284	0.020408163	0.053833605	0.034693878	0.073409462	0.073469388	0.052202284	0.02244898	0.060358891	0.069387755	0.070146819	0.067346939	0.014681892	0.02244898	0.039151713	0.048979592	0.016313214	0.020408163	0.04730832
YPL184C_YNL053W	0	0	16	14	1	0	197787	529943	195949	531412	612	489	5.74	7.21	68.663	54.217	0.057096248	0.034693878	0.070146819	0.03877551	0.061990212	0.1	0.017944535	0.030612245	0.057096248	0.028571429	0.003262643	0.004081633	0.044045677	0.065306122	0.052202284	0.026530612	0.053833605	0.059183673	0.073409462	0.146938776	0.052202284	0.079591837	0.060358891	0.053061224	0.070146819	0.055102041	0.014681892	0.008163265	0.039151713	0.026530612	0.016313214	0.028571429	0.04730832
YPL184C_YGL035C	0	0	16	7	1	1	197787	433067	195949	431553	612	504	5.74	10.58	68.663	55.532	0.057096248	0.03960396	0.070146819	0.043564356	0.061990212	0.093069307	0.017944535	0.027722772	0.057096248	0.021782178	0.003262643	0	0.044045677	0.051485149	0.052202284	0.081188119	0.053833605	0.037623762	0.073409462	0.156435644	0.052202284	0.081188119	0.060358891	0.035643564	0.070146819	0.035643564	0.014681892	0.007920792	0.039151713	0.011881188	0.016313214	0.033663366	0.04730832
YPL184C_YLR060W	0	0	16	12	1	0	197787	260980	195949	262767	612	595	5.74	5.61	68.663	67.364	0.057096248	0.046979866	0.070146819	0.062080537	0.061990212	0.092281879	0.017944535	0.021812081	0.057096248	0.048657718	0.003262643	0.006711409	0.044045677	0.077181208	0.052202284	0.030201342	0.053833605	0.07885906	0.073409462	0.063758389	0.052202284	0.05033557	0.060358891	0.065436242	0.070146819	0.072147651	0.014681892	0.015100671	0.039151713	0.02852349	0.016313214	0.025167785	0.04730832
YPL184C_YGL112C	0	0	16	7	1	1	197787	299731	195949	298181	612	516	5.74	5.17	68.663	57.901	0.057096248	0.044487427	0.070146819	0.056092843	0.061990212	0.127659574	0.017944535	0.00967118	0.057096248	0.040618956	0.003262643	0.005802708	0.044045677	0.065764023	0.052202284	0.048355899	0.053833605	0.065764023	0.073409462	0.075435203	0.052202284	0.042553191	0.060358891	0.073500967	0.070146819	0.061895551	0.014681892	0.003868472	0.039151713	0.030947776	0.016313214	0.01934236	0.04730832
YPL184C_YDR272W	0	0	16	4	1	0	197787	1009007	195949	1009831	612	274	5.74	6.13	68.663	31.326	0.057096248	0.058181818	0.070146819	0.043636364	0.061990212	0.069090909	0.017944535	0.025454545	0.057096248	0.032727273	0.003262643	0.014545455	0.044045677	0.090909091	0.052202284	0.021818182	0.053833605	0.087272727	0.073409462	0.050909091	0.052202284	0.047272727	0.060358891	0.061818182	0.070146819	0.058181818	0.014681892	0.029090909	0.039151713	0.032727273	0.016313214	0.029090909	0.04730832
YPL184C_YLR378C	0	0	16	12	1	1	197787	877177	195949	875735	612	480	5.74	10.18	68.663	52.936	0.057096248	0.083160083	0.070146819	0.070686071	0.061990212	0.137214137	0.017944535	0.029106029	0.057096248	0.06029106	0.003262643	0.01039501	0.044045677	0.045738046	0.052202284	0.047817048	0.053833605	0.03950104	0.073409462	0.074844075	0.052202284	0.04989605	0.060358891	0.054054054	0.070146819	0.097713098	0.014681892	0.006237006	0.039151713	0.037422037	0.016313214	0.002079002	0.04730832
YPL184C_YBR164C	0	0	16	2	1	1	197787	568421	195949	567870	612	183	5.74	4.64	68.663	20.434	0.057096248	0.070652174	0.070146819	0.065217391	0.061990212	0.130434783	0.017944535	0.02173913	0.057096248	0.027173913	0.003262643	0.027173913	0.044045677	0.070652174	0.052202284	0.038043478	0.053833605	0.076086957	0.073409462	0.081521739	0.052202284	0.016304348	0.060358891	0.065217391	0.070146819	0.070652174	0.014681892	0.005434783	0.039151713	0.027173913	0.016313214	0.005434783	0.04730832
YPL184C_YEL044W	0	0	16	5	1	0	197787	69757	195949	70257	612	166	5.74	11.05	68.663	18.533	0.057096248	0.05988024	0.070146819	0.083832335	0.061990212	0.071856287	0.017944535	0.011976048	0.057096248	0.035928144	0.003262643	0	0.044045677	0.089820359	0.052202284	0.017964072	0.053833605	0.047904192	0.073409462	0.107784431	0.052202284	0.053892216	0.060358891	0.047904192	0.070146819	0.041916168	0.014681892	0.005988024	0.039151713	0.041916168	0.016313214	0.017964072	0.04730832
YPL184C_YDR329C	0	0	16	4	1	1	197787	1127591	195949	1126266	612	441	5.74	6.29	68.663	50.675	0.057096248	0.027149321	0.070146819	0.045248869	0.061990212	0.122171946	0.017944535	0.022624434	0.057096248	0.045248869	0.003262643	0.020361991	0.044045677	0.063348416	0.052202284	0.074660633	0.053833605	0.067873303	0.073409462	0.108597285	0.052202284	0.020361991	0.060358891	0.052036199	0.070146819	0.061085973	0.014681892	0.009049774	0.039151713	0.024886878	0.016313214	0.013574661	0.04730832
YPL184C_YDL108W	0	0	16	4	1	0	197787	267698	195949	268699	612	306	5.74	6.87	68.663	35.247	0.057096248	0.042345277	0.070146819	0.061889251	0.061990212	0.09771987	0.017944535	0.042345277	0.057096248	0.045602606	0.003262643	0.016286645	0.044045677	0.06514658	0.052202284	0.029315961	0.053833605	0.061889251	0.073409462	0.052117264	0.052202284	0.06514658	0.060358891	0.061889251	0.070146819	0.071661238	0.014681892	0.013029316	0.039151713	0.042345277	0.016313214	0.022801303	0.04730832
YPL184C_YOR027W	0	0	16	15	1	0	197787	381053	195949	382822	612	589	5.74	5.36	68.663	66.264	0.057096248	0.03559322	0.070146819	0.125423729	0.061990212	0.069491525	0.017944535	0.027118644	0.057096248	0.022033898	0.003262643	0.005084746	0.044045677	0.101694915	0.052202284	0.055932203	0.053833605	0.1	0.073409462	0.061016949	0.052202284	0.040677966	0.060358891	0.028813559	0.070146819	0.047457627	0.014681892	0.005084746	0.039151713	0.042372881	0.016313214	0.013559322	0.04730832
YPL184C_YOR359W	0	0	16	15	1	0	197787	1011187	195949	1012758	612	523	5.74	9.59	68.663	57.556	0.057096248	0.038167939	0.070146819	0.041984733	0.061990212	0.091603053	0.017944535	0.026717557	0.057096248	0.022900763	0.003262643	0.007633588	0.044045677	0.049618321	0.052202284	0.082061069	0.053833605	0.020992366	0.073409462	0.16221374	0.052202284	0.082061069	0.060358891	0.02480916	0.070146819	0.055343511	0.014681892	0.001908397	0.039151713	0.026717557	0.016313214	0.030534351	0.04730832
YPL184C_YLR370C	0	0	16	12	1	1	197787	862253	195949	861717	612	178	5.74	8.11	68.663	20.578	0.057096248	0.027932961	0.070146819	0.055865922	0.061990212	0.111731844	0.017944535	0.027932961	0.057096248	0.083798883	0.003262643	0.005586592	0.044045677	0.05027933	0.052202284	0.027932961	0.053833605	0.033519553	0.073409462	0.067039106	0.052202284	0.067039106	0.060358891	0.055865922	0.070146819	0.044692737	0.014681892	0.011173184	0.039151713	0.044692737	0.016313214	0.016759777	0.04730832
YPL184C_YMR199W	0	0	16	13	1	0	197787	662643	195949	664283	612	546	5.74	5.68	68.663	62.049	0.057096248	0.040219378	0.070146819	0.032906764	0.061990212	0.08226691	0.017944535	0.027422303	0.057096248	0.038391225	0.003262643	0.009140768	0.044045677	0.047531993	0.052202284	0.060329068	0.053833605	0.058500914	0.073409462	0.115173675	0.052202284	0.042047532	0.060358891	0.049360146	0.070146819	0.074954296	0.014681892	0.016453382	0.039151713	0.042047532	0.016313214	0.021937843	0.04730832
YPL184C_YPR173C	0	0	16	16	1	1	197787	887833	195949	886520	612	437	5.74	4.96	68.663	48.172	0.057096248	0.077625571	0.070146819	0.082191781	0.061990212	0.093607306	0.017944535	0.020547945	0.057096248	0.03196347	0.003262643	0.00913242	0.044045677	0.089041096	0.052202284	0.029680365	0.053833605	0.091324201	0.073409462	0.073059361	0.052202284	0.04109589	0.060358891	0.047945205	0.070146819	0.052511416	0.014681892	0.00456621	0.039151713	0.02739726	0.016313214	0.006849315	0.04730832
YPL184C_YHR161C	0	0	16	8	1	1	197787	422289	195949	420376	612	637	5.74	7.04	68.663	71.66	0.057096248	0.048589342	0.070146819	0.067398119	0.061990212	0.078369906	0.017944535	0.020376176	0.057096248	0.039184953	0.003262643	0.001567398	0.044045677	0.047021944	0.052202284	0.114420063	0.053833605	0.045454545	0.073409462	0.068965517	0.052202284	0.051724138	0.060358891	0.05799373	0.070146819	0.054858934	0.014681892	0.001567398	0.039151713	0.042319749	0.016313214	0.028213166	0.04730832
YPL184C_YLR258W	0	0	16	12	1	0	197787	660718	195949	662835	612	705	5.74	6.32	68.663	80.078	0.057096248	0.065155807	0.070146819	0.073654391	0.061990212	0.099150142	0.017944535	0.019830028	0.057096248	0.050991501	0.003262643	0.011331445	0.044045677	0.052407932	0.052202284	0.028328612	0.053833605	0.062322946	0.073409462	0.049575071	0.052202284	0.043909348	0.060358891	0.073654391	0.070146819	0.04815864	0.014681892	0.009915014	0.039151713	0.041076487	0.016313214	0.033994334	0.04730832
YPL184C_YDR399W	0	0	16	4	1	0	197787	1270061	195949	1270726	612	221	5.74	5.48	68.663	25.191	0.057096248	0.04954955	0.070146819	0.072072072	0.061990212	0.072072072	0.017944535	0.018018018	0.057096248	0.040540541	0.003262643	0.013513514	0.044045677	0.09009009	0.052202284	0.045045045	0.053833605	0.081081081	0.073409462	0.045045045	0.052202284	0.045045045	0.060358891	0.067567568	0.070146819	0.085585586	0.014681892	0.009009009	0.039151713	0.036036036	0.016313214	0.022522523	0.04730832
YPL184C_YNL251C	0	0	16	14	1	1	197787	174316	195949	172589	612	575	5.74	9.96	68.663	63.858	0.057096248	0.055555556	0.070146819	0.064236111	0.061990212	0.078125	0.017944535	0.017361111	0.057096248	0.027777778	0.003262643	0.008680556	0.044045677	0.057291667	0.052202284	0.074652778	0.053833605	0.032986111	0.073409462	0.109375	0.052202284	0.083333333	0.060358891	0.043402778	0.070146819	0.059027778	0.014681892	0.008680556	0.039151713	0.034722222	0.016313214	0.026041667	0.04730832
YPL184C_YKL186C	0	0	16	11	1	1	197787	93303	195949	92749	612	184	5.74	7.93	68.663	20.783	0.057096248	0.054054054	0.070146819	0.059459459	0.061990212	0.064864865	0.017944535	0.037837838	0.057096248	0.059459459	0.003262643	0.010810811	0.044045677	0.043243243	0.052202284	0.07027027	0.053833605	0.010810811	0.073409462	0.037837838	0.052202284	0.059459459	0.060358891	0.059459459	0.070146819	0.07027027	0.014681892	0.016216216	0.039151713	0.021621622	0.016313214	0.016216216	0.04730832
YPL184C_YPR034W	0	0	16	16	1	0	197787	639522	195949	640955	612	477	5.74	5.23	68.663	53.81	0.057096248	0.054393305	0.070146819	0.064853556	0.061990212	0.094142259	0.017944535	0.033472803	0.057096248	0.037656904	0.003262643	0.014644351	0.044045677	0.071129707	0.052202284	0.058577406	0.053833605	0.066945607	0.073409462	0.075313808	0.052202284	0.043933054	0.060358891	0.054393305	0.070146819	0.062761506	0.014681892	0.008368201	0.039151713	0.039748954	0.016313214	0.008368201	0.04730832
YPL184C_YML059C	0	0	16	13	1	1	197787	158258	195949	153219	612	1679	5.74	8.19	68.663	187.131	0.057096248	0.056547619	0.070146819	0.050595238	0.061990212	0.100595238	0.017944535	0.02202381	0.057096248	0.042261905	0.003262643	0.00952381	0.044045677	0.055952381	0.052202284	0.035714286	0.053833605	0.050595238	0.073409462	0.120833333	0.052202284	0.046428571	0.060358891	0.054761905	0.070146819	0.0625	0.014681892	0.005952381	0.039151713	0.033928571	0.016313214	0.029761905	0.04730832
YPL184C_YGR229C	0	0	16	7	1	1	197787	950902	195949	949385	612	505	5.74	4.42	68.663	57.079	0.057096248	0.049407115	0.070146819	0.057312253	0.061990212	0.059288538	0.017944535	0.019762846	0.057096248	0.037549407	0.003262643	0.015810277	0.044045677	0.071146245	0.052202284	0.057312253	0.053833605	0.104743083	0.073409462	0.083003953	0.052202284	0.045454545	0.060358891	0.063241107	0.070146819	0.041501976	0.014681892	0.001976285	0.039151713	0.02173913	0.016313214	0.0256917	0.04730832
YPL184C_YGL097W	0	0	16	7	1	0	197787	321785	195949	323233	612	482	5.74	6.02	68.663	53.013	0.057096248	0.091097308	0.070146819	0.078674948	0.061990212	0.082815735	0.017944535	0.022774327	0.057096248	0.039337474	0.003262643	0.016563147	0.044045677	0.072463768	0.052202284	0.033126294	0.053833605	0.060041408	0.073409462	0.062111801	0.052202284	0.047619048	0.060358891	0.068322981	0.070146819	0.041407867	0.014681892	0.01863354	0.039151713	0.022774327	0.016313214	0.031055901	0.04730832
YPL184C_YBR260C	0	0	16	2	1	1	197787	734634	195949	732634	612	666	5.74	8.56	68.663	74.618	0.057096248	0.028485757	0.070146819	0.059970015	0.061990212	0.100449775	0.017944535	0.029985007	0.057096248	0.032983508	0.003262643	0.005997001	0.044045677	0.088455772	0.052202284	0.04197901	0.053833605	0.059970015	0.073409462	0.112443778	0.052202284	0.053973013	0.060358891	0.047976012	0.070146819	0.064467766	0.014681892	0.007496252	0.039151713	0.022488756	0.016313214	0.023988006	0.04730832
YPL184C_YNL030W	0	0	16	14	1	0	197787	576728	195949	577039	612	103	5.74	11.95	68.663	11.368	0.057096248	0.153846154	0.070146819	0.057692308	0.061990212	0.086538462	0.017944535	0.009615385	0.057096248	0.019230769	0.003262643	0	0.044045677	0.105769231	0.052202284	0.019230769	0.053833605	0.038461538	0.073409462	0.057692308	0.052202284	0.009615385	0.060358891	0.076923077	0.070146819	0.067307692	0.014681892	0	0.039151713	0.038461538	0.016313214	0.019230769	0.04730832
YPL184C_YAL044C	0	0	16	1	1	1	197787	58463	195949	57951	612	170	5.74	4.49	68.663	18.793	0.057096248	0.081871345	0.070146819	0.058479532	0.061990212	0.093567251	0.017944535	0.029239766	0.057096248	0.01754386	0.003262643	0.01754386	0.044045677	0.052631579	0.052202284	0.046783626	0.053833605	0.099415205	0.073409462	0.070175439	0.052202284	0.040935673	0.060358891	0.087719298	0.070146819	0.035087719	0.014681892	0	0.039151713	0.035087719	0.016313214	0.01754386	0.04730832
YPL184C_YDL022W	0	0	16	4	1	0	197787	411823	195949	412998	612	391	5.74	5.26	68.663	42.869	0.057096248	0.086734694	0.070146819	0.081632653	0.061990212	0.081632653	0.017944535	0.015306122	0.057096248	0.038265306	0.003262643	0.015306122	0.044045677	0.056122449	0.052202284	0.033163265	0.053833605	0.084183673	0.073409462	0.06122449	0.052202284	0.035714286	0.060358891	0.089285714	0.070146819	0.068877551	0.014681892	0.025510204	0.039151713	0.025510204	0.016313214	0.030612245	0.04730832
YPL184C_YDR397C	0	0	16	4	1	1	197787	1266891	195949	1266359	612	146	5.74	4.72	68.663	16.65	0.057096248	0.027210884	0.070146819	0.054421769	0.061990212	0.095238095	0.017944535	0.040816327	0.057096248	0.047619048	0.003262643	0	0.044045677	0.088435374	0.052202284	0.040816327	0.053833605	0.129251701	0.073409462	0.12244898	0.052202284	0.027210884	0.060358891	0.040816327	0.070146819	0.081632653	0.014681892	0	0.039151713	0.006802721	0.016313214	0.020408163	0.04730832
YPL184C_YCR030C	0	0	16	3	1	1	197787	176434	195949	173822	612	870	5.74	9.17	68.663	96.137	0.057096248	0.037887486	0.070146819	0.063145809	0.061990212	0.083811711	0.017944535	0.010332951	0.057096248	0.035591274	0.003262643	0.008036739	0.044045677	0.063145809	0.052202284	0.052812859	0.053833605	0.064293915	0.073409462	0.133180253	0.052202284	0.068886338	0.060358891	0.048220436	0.070146819	0.05510907	0.014681892	0.003444317	0.039151713	0.019517796	0.016313214	0.019517796	0.04730832
YPL184C_YGL087C	0	0	16	7	1	1	197787	346907	195949	346409	612	137	5.74	6.76	68.663	15.545	0.057096248	0.065217391	0.070146819	0.028985507	0.061990212	0.094202899	0.017944535	0.028985507	0.057096248	0.036231884	0.003262643	0.014492754	0.044045677	0.079710145	0.052202284	0.014492754	0.053833605	0.079710145	0.073409462	0.065217391	0.052202284	0.086956522	0.060358891	0.028985507	0.070146819	0.043478261	0.014681892	0.02173913	0.039151713	0.028985507	0.016313214	0.02173913	0.04730832
YPL184C_YGL161C	0	0	16	7	1	1	197787	200148	195949	199216	612	310	5.74	4.64	68.663	34.843	0.057096248	0.064308682	0.070146819	0.048231511	0.061990212	0.08681672	0.017944535	0.022508039	0.057096248	0.064308682	0.003262643	0.01607717	0.044045677	0.035369775	0.052202284	0.041800643	0.053833605	0.038585209	0.073409462	0.093247588	0.052202284	0.038585209	0.060358891	0.064308682	0.070146819	0.077170418	0.014681892	0.006430868	0.039151713	0.035369775	0.016313214	0.012861736	0.04730832
YPL184C_YLR221C	0	0	16	12	1	1	197787	579026	195949	578364	612	220	5.74	4.61	68.663	24.656	0.057096248	0.049773756	0.070146819	0.058823529	0.061990212	0.081447964	0.017944535	0.018099548	0.057096248	0.027149321	0.003262643	0	0.044045677	0.113122172	0.052202284	0.018099548	0.053833605	0.131221719	0.073409462	0.108597285	0.052202284	0.022624434	0.060358891	0.040723982	0.070146819	0.07239819	0.014681892	0	0.039151713	0.013574661	0.016313214	0.009049774	0.04730832
YPL184C_YHR042W	0	0	16	8	1	0	197787	190536	195949	192611	612	691	5.74	4.89	68.663	76.771	0.057096248	0.062138728	0.070146819	0.069364162	0.061990212	0.095375723	0.017944535	0.018786127	0.057096248	0.053468208	0.003262643	0.007225434	0.044045677	0.063583815	0.052202284	0.031791908	0.053833605	0.060693642	0.073409462	0.078034682	0.052202284	0.052023121	0.060358891	0.073699422	0.070146819	0.053468208	0.014681892	0.005780347	0.039151713	0.039017341	0.016313214	0.01734104	0.04730832
YPL184C_YNL010W	0	0	16	14	1	0	197787	613636	195949	614361	612	241	5.74	5.18	68.663	27.48	0.057096248	0.05785124	0.070146819	0.045454545	0.061990212	0.078512397	0.017944535	0.024793388	0.057096248	0.066115702	0.003262643	0.008264463	0.044045677	0.111570248	0.052202284	0.02892562	0.053833605	0.082644628	0.073409462	0.05785124	0.052202284	0.033057851	0.060358891	0.078512397	0.070146819	0.066115702	0.014681892	0.016528926	0.039151713	0.024793388	0.016313214	0.020661157	0.04730832
YPL184C_YCR069W	0	0	16	3	1	0	197787	239051	195949	240007	612	318	5.74	6.9	68.663	35.78	0.057096248	0.062695925	0.070146819	0.056426332	0.061990212	0.094043887	0.017944535	0.021943574	0.057096248	0.043887147	0.003262643	0.003134796	0.044045677	0.081504702	0.052202284	0.02507837	0.053833605	0.056426332	0.073409462	0.059561129	0.052202284	0.053291536	0.060358891	0.068965517	0.070146819	0.056426332	0.014681892	0.012539185	0.039151713	0.056426332	0.016313214	0.034482759	0.04730832
YPL184C_YGR007W	0	0	16	7	1	0	197787	506973	195949	507944	612	323	5.74	6.44	68.663	36.863	0.057096248	0.055555556	0.070146819	0.049382716	0.061990212	0.058641975	0.017944535	0.030864198	0.057096248	0.030864198	0.003262643	0.009259259	0.044045677	0.077160494	0.052202284	0.033950617	0.053833605	0.052469136	0.073409462	0.061728395	0.052202284	0.027777778	0.060358891	0.092592593	0.070146819	0.055555556	0.014681892	0.027777778	0.039151713	0.055555556	0.016313214	0.040123457	0.04730832
YPL184C_YEL037C	0	0	16	5	1	1	197787	82603	195949	81407	612	398	5.74	4.07	68.663	42.366	0.057096248	0.07518797	0.070146819	0.120300752	0.061990212	0.072681704	0.017944535	0.025062657	0.057096248	0.027568922	0.003262643	0	0.044045677	0.037593985	0.052202284	0.062656642	0.053833605	0.115288221	0.073409462	0.072681704	0.052202284	0.060150376	0.060358891	0.060150376	0.070146819	0.037593985	0.014681892	0.010025063	0.039151713	0.015037594	0.016313214	0.005012531	0.04730832
YPL184C_YFL017C	0	0	16	6	1	1	197787	104456	195949	103977	612	159	5.74	4.97	68.663	18.135	0.057096248	0.08125	0.070146819	0.03125	0.061990212	0.075	0.017944535	0.03125	0.057096248	0.03125	0.003262643	0.0125	0.044045677	0.0875	0.052202284	0.0375	0.053833605	0.0875	0.073409462	0.03125	0.052202284	0.01875	0.060358891	0.06875	0.070146819	0.10625	0.014681892	0.025	0.039151713	0.04375	0.016313214	0.0125	0.04730832
YPL184C_YLL036C	0	0	16	12	1	1	197787	68255	195949	66744	612	503	5.74	4.87	68.663	56.569	0.057096248	0.041666667	0.070146819	0.061507937	0.061990212	0.099206349	0.017944535	0.01984127	0.057096248	0.029761905	0.003262643	0.011904762	0.044045677	0.075396825	0.052202284	0.035714286	0.053833605	0.06547619	0.073409462	0.087301587	0.052202284	0.043650794	0.060358891	0.055555556	0.070146819	0.063492063	0.014681892	0.017857143	0.039151713	0.043650794	0.016313214	0.009920635	0.04730832
YPL184C_YHR135C	0	0	16	8	1	1	197787	374313	195949	372697	612	538	5.74	9.81	68.663	61.715	0.057096248	0.064935065	0.070146819	0.057513915	0.061990212	0.089053803	0.017944535	0.022263451	0.057096248	0.031539889	0.003262643	0.00742115	0.044045677	0.06864564	0.052202284	0.133580705	0.053833605	0.046382189	0.073409462	0.055658627	0.052202284	0.055658627	0.060358891	0.033395176	0.070146819	0.042671614	0.014681892	0.00742115	0.039151713	0.044526902	0.016313214	0.031539889	0.04730832
YPL184C_YGR078C	0	0	16	7	1	1	197787	640375	195949	639776	612	199	5.74	4.61	68.663	23.115	0.057096248	0.025	0.070146819	0.05	0.061990212	0.12	0.017944535	0.02	0.057096248	0.035	0.003262643	0.01	0.044045677	0.085	0.052202284	0.06	0.053833605	0.1	0.073409462	0.05	0.052202284	0.035	0.060358891	0.04	0.070146819	0.065	0.014681892	0.015	0.039151713	0.025	0.016313214	0.01	0.04730832
YPL184C_YGR106C	0	0	16	7	1	1	197787	699790	195949	698993	612	265	5.74	3.77	68.663	29.678	0.057096248	0.030075188	0.070146819	0.04887218	0.061990212	0.120300752	0.017944535	0.015037594	0.057096248	0.071428571	0.003262643	0.015037594	0.044045677	0.04887218	0.052202284	0.015037594	0.053833605	0.071428571	0.073409462	0.139097744	0.052202284	0.018796992	0.060358891	0.04887218	0.070146819	0.078947368	0.014681892	0.015037594	0.039151713	0.026315789	0.016313214	0.011278195	0.04730832
YPL184C_YDR268W	0	0	16	4	1	0	197787	1004001	195949	1005140	612	379	5.74	9.91	68.663	43.015	0.057096248	0.044736842	0.070146819	0.060526316	0.061990212	0.092105263	0.017944535	0.026315789	0.057096248	0.042105263	0.003262643	0.010526316	0.044045677	0.092105263	0.052202284	0.039473684	0.053833605	0.057894737	0.073409462	0.086842105	0.052202284	0.044736842	0.060358891	0.076315789	0.070146819	0.060526316	0.014681892	0.005263158	0.039151713	0.031578947	0.016313214	0.031578947	0.04730832
YPL184C_YMR296C	0	0	16	13	1	1	197787	860890	195949	859214	612	558	5.74	6.12	68.663	62.207	0.057096248	0.046511628	0.070146819	0.064400716	0.061990212	0.103756708	0.017944535	0.017889088	0.057096248	0.04293381	0.003262643	0.005366726	0.044045677	0.060822898	0.052202284	0.053667263	0.053833605	0.059033989	0.073409462	0.084078712	0.052202284	0.053667263	0.060358891	0.071556351	0.070146819	0.060822898	0.014681892	0.021466905	0.039151713	0.04293381	0.016313214	0.021466905	0.04730832
YPL184C_YHR121W	0	0	16	8	1	0	197787	352759	195949	353322	612	187	5.74	10.18	68.663	21.313	0.057096248	0.058510638	0.070146819	0.015957447	0.061990212	0.074468085	0.017944535	0.005319149	0.057096248	0.04787234	0.003262643	0.010638298	0.044045677	0.122340426	0.052202284	0.069148936	0.053833605	0.069148936	0.073409462	0.079787234	0.052202284	0.026595745	0.060358891	0.095744681	0.070146819	0.090425532	0.014681892	0.005319149	0.039151713	0.015957447	0.016313214	0.010638298	0.04730832
YPL184C_YLR450W	0	0	16	12	1	0	197787	1032624	195949	1035761	612	1045	5.74	7.52	68.663	115.691	0.057096248	0.051625239	0.070146819	0.073613767	0.061990212	0.115678776	0.017944535	0.023900574	0.057096248	0.04206501	0.003262643	0.006692161	0.044045677	0.056405354	0.052202284	0.027724665	0.053833605	0.04875717	0.073409462	0.093690249	0.052202284	0.041108987	0.060358891	0.070745698	0.070146819	0.078393881	0.014681892	0.018164436	0.039151713	0.040152964	0.016313214	0.020076482	0.04730832
YPL184C_YER154W	0	0	16	5	1	0	197787	475015	195949	476223	612	402	5.74	10.94	68.663	44.815	0.057096248	0.044665012	0.070146819	0.089330025	0.061990212	0.101736973	0.017944535	0.027295285	0.057096248	0.047146402	0.003262643	0.019851117	0.044045677	0.05955335	0.052202284	0.05955335	0.053833605	0.029776675	0.073409462	0.096774194	0.052202284	0.049627792	0.060358891	0.049627792	0.070146819	0.074441687	0.014681892	0.00248139	0.039151713	0.017369727	0.016313214	0.022332506	0.04730832
YPL184C_YDR451C	0	0	16	4	1	1	197787	1362174	195949	1361113	612	353	5.74	10.75	68.663	39.598	0.057096248	0.025423729	0.070146819	0.056497175	0.061990212	0.070621469	0.017944535	0.016949153	0.057096248	0.036723164	0.003262643	0.002824859	0.044045677	0.104519774	0.052202284	0.036723164	0.053833605	0.056497175	0.073409462	0.118644068	0.052202284	0.081920904	0.060358891	0.042372881	0.070146819	0.050847458	0.014681892	0.016949153	0.039151713	0.014124294	0.016313214	0.033898305	0.04730832
YPL184C_YLR449W	0	0	16	12	1	0	197787	1030830	195949	1032008	612	392	5.74	4.41	68.663	43.903	0.057096248	0.066157761	0.070146819	0.048346056	0.061990212	0.061068702	0.017944535	0.015267176	0.057096248	0.022900763	0.003262643	0.002544529	0.044045677	0.119592875	0.052202284	0.025445293	0.053833605	0.13740458	0.073409462	0.076335878	0.052202284	0.055979644	0.060358891	0.061068702	0.070146819	0.048346056	0.014681892	0.002544529	0.039151713	0.030534351	0.016313214	0.007633588	0.04730832
YPL184C_YNL046W	0	0	16	14	1	0	197787	542305	195949	542823	612	172	5.74	11.06	68.663	19.35	0.057096248	0.057803468	0.070146819	0.023121387	0.061990212	0.086705202	0.017944535	0.01734104	0.057096248	0.052023121	0.003262643	0.011560694	0.044045677	0.069364162	0.052202284	0.046242775	0.053833605	0.023121387	0.073409462	0.132947977	0.052202284	0.046242775	0.060358891	0.098265896	0.070146819	0.075144509	0.014681892	0.011560694	0.039151713	0.028901734	0.016313214	0.023121387	0.04730832
YPL184C_YKL068W	0	0	16	11	1	0	197787	309843	195949	312722	612	959	5.74	10.15	68.663	99.988	0.057096248	0.125	0.070146819	0.041666667	0.061990212	0.069791667	0.017944535	0.010416667	0.057096248	0.0625	0.003262643	0.001041667	0.044045677	0.046875	0.052202284	0.063541667	0.053833605	0.019791667	0.073409462	0.14375	0.052202284	0.046875	0.060358891	0.029166667	0.070146819	0.028125	0.014681892	0.005208333	0.039151713	0.0125	0.016313214	0.007291667	0.04730832
YPL184C_YBR048W	0	0	16	2	1	0	197787	332829	195949	333810	612	156	5.74	11.55	68.663	17.749	0.057096248	0.057324841	0.070146819	0.063694268	0.061990212	0.031847134	0.017944535	0.012738854	0.057096248	0.050955414	0.003262643	0.006369427	0.044045677	0.127388535	0.052202284	0.038216561	0.053833605	0.025477707	0.073409462	0.057324841	0.052202284	0.050955414	0.060358891	0.108280255	0.070146819	0.063694268	0.014681892	0.012738854	0.039151713	0.038216561	0.016313214	0.031847134	0.04730832
YPL184C_YPR035W	0	0	16	16	1	0	197787	642205	195949	643317	612	370	5.74	6.3	68.663	41.706	0.057096248	0.094339623	0.070146819	0.083557951	0.061990212	0.053908356	0.017944535	0.029649596	0.057096248	0.035040431	0.003262643	0.018867925	0.044045677	0.056603774	0.052202284	0.032345013	0.053833605	0.07277628	0.073409462	0.056603774	0.052202284	0.04851752	0.060358891	0.040431267	0.070146819	0.064690027	0.014681892	0.018867925	0.039151713	0.056603774	0.016313214	0.029649596	0.04730832
YPL184C_YHR190W	0	0	16	8	1	0	197787	484845	195949	486179	612	444	5.74	5.79	68.663	51.719	0.057096248	0.035955056	0.070146819	0.047191011	0.061990212	0.143820225	0.017944535	0.024719101	0.057096248	0.049438202	0.003262643	0.006741573	0.044045677	0.065168539	0.052202284	0.040449438	0.053833605	0.074157303	0.073409462	0.047191011	0.052202284	0.035955056	0.060358891	0.058426966	0.070146819	0.071910112	0.014681892	0.017977528	0.039151713	0.051685393	0.016313214	0.031460674	0.04730832
YPL184C_YGR014W	0	0	16	7	1	0	197787	516947	195949	520867	612	1306	5.74	3.9	68.663	133.113	0.057096248	0.037490436	0.070146819	0.078806427	0.061990212	0.052792655	0.017944535	0.013006886	0.057096248	0.030604438	0.003262643	0.004590666	0.044045677	0.012241775	0.052202284	0.052027544	0.053833605	0.033664881	0.073409462	0.289977047	0.052202284	0.045906656	0.060358891	0.068859985	0.070146819	0.04055088	0.014681892	0.001530222	0.039151713	0.025248661	0.016313214	0.006120888	0.04730832
YPL184C_YNR040W	0	0	16	14	1	0	197787	699692	195949	700462	612	256	5.74	10.92	68.663	28.636	0.057096248	0.054474708	0.070146819	0.077821012	0.061990212	0.077821012	0.017944535	0.019455253	0.057096248	0.06614786	0.003262643	0.011673152	0.044045677	0.089494163	0.052202284	0.023346304	0.053833605	0.046692607	0.073409462	0.089494163	0.052202284	0.042801556	0.060358891	0.077821012	0.070146819	0.046692607	0.014681892	0.011673152	0.039151713	0.027237354	0.016313214	0.015564202	0.04730832
YPL184C_YER083C	0	0	16	5	1	1	197787	327027	195949	326170	612	285	5.74	10.29	68.663	31.493	0.057096248	0.041958042	0.070146819	0.090909091	0.061990212	0.15034965	0.017944535	0.017482517	0.057096248	0.038461538	0.003262643	0.017482517	0.044045677	0.062937063	0.052202284	0.045454545	0.053833605	0.034965035	0.073409462	0.101398601	0.052202284	0.066433566	0.060358891	0.045454545	0.070146819	0.048951049	0.014681892	0	0.039151713	0.031468531	0.016313214	0.013986014	0.04730832
YPL184C_YBL040C	0	0	16	2	1	1	197787	142871	195949	142115	612	219	5.74	10.62	68.663	25.762	0.057096248	0.045454545	0.070146819	0.05	0.061990212	0.15	0.017944535	0.031818182	0.057096248	0.081818182	0.003262643	0.022727273	0.044045677	0.068181818	0.052202284	0.022727273	0.053833605	0.022727273	0.073409462	0.068181818	0.052202284	0.018181818	0.060358891	0.045454545	0.070146819	0.095454545	0.014681892	0	0.039151713	0.068181818	0.016313214	0.036363636	0.04730832
YPL184C_YIL078W	0	0	16	9	1	0	197787	212496	195949	214700	612	734	5.74	7.01	68.663	84.52	0.057096248	0.063945578	0.070146819	0.053061224	0.061990212	0.084353741	0.017944535	0.029931973	0.057096248	0.053061224	0.003262643	0.017687075	0.044045677	0.088435374	0.052202284	0.036734694	0.053833605	0.08707483	0.073409462	0.063945578	0.052202284	0.038095238	0.060358891	0.062585034	0.070146819	0.047619048	0.014681892	0.016326531	0.039151713	0.032653061	0.016313214	0.02585034	0.04730832
YPL184C_YJR005W	0	0	16	10	1	0	197787	445915	195949	448017	612	700	5.74	6.36	68.663	80.453	0.057096248	0.018544936	0.070146819	0.045649073	0.061990212	0.144079886	0.017944535	0.02425107	0.057096248	0.038516405	0.003262643	0.005706134	0.044045677	0.074179743	0.052202284	0.032810271	0.053833605	0.07703281	0.073409462	0.079885877	0.052202284	0.047075606	0.060358891	0.071326676	0.070146819	0.074179743	0.014681892	0.008559201	0.039151713	0.031383738	0.016313214	0.018544936	0.04730832
YPL184C_YBL026W	0	0	16	2	1	0	197787	170626	195949	171041	612	95	5.74	8.4	68.663	11.163	0.057096248	0.03125	0.070146819	0.010416667	0.061990212	0.114583333	0.017944535	0.03125	0.057096248	0.0625	0.003262643	0	0.044045677	0.083333333	0.052202284	0.041666667	0.053833605	0.0625	0.073409462	0.052083333	0.052202284	0.010416667	0.060358891	0.104166667	0.070146819	0.052083333	0.014681892	0.010416667	0.039151713	0.03125	0.016313214	0.010416667	0.04730832
YPL184C_YDL008W	0	0	16	4	1	0	197787	433495	195949	433992	612	165	5.74	4.58	68.663	18.865	0.057096248	0.054216867	0.070146819	0.042168675	0.061990212	0.054216867	0.017944535	0.018072289	0.057096248	0.048192771	0.003262643	0.018072289	0.044045677	0.036144578	0.052202284	0.048192771	0.053833605	0.078313253	0.073409462	0.048192771	0.052202284	0.054216867	0.060358891	0.06626506	0.070146819	0.072289157	0.014681892	0.054216867	0.039151713	0.012048193	0.016313214	0.042168675	0.04730832
YPL184C_YJR017C	0	0	16	10	1	1	197787	467025	195949	466513	612	170	5.74	9.19	68.663	19.405	0.057096248	0.064327485	0.070146819	0.040935673	0.061990212	0.064327485	0.017944535	0.011695906	0.057096248	0.035087719	0.003262643	0.01754386	0.044045677	0.087719298	0.052202284	0.029239766	0.053833605	0.076023392	0.073409462	0.105263158	0.052202284	0.046783626	0.060358891	0.058479532	0.070146819	0.040935673	0.014681892	0.011695906	0.039151713	0.01754386	0.016313214	0.046783626	0.04730832
YPL184C_YNL036W	0	0	16	14	1	0	197787	559815	195949	560480	612	221	5.74	6.99	68.663	24.859	0.057096248	0.045045045	0.070146819	0.04954955	0.061990212	0.103603604	0.017944535	0.013513514	0.057096248	0.027027027	0.003262643	0.009009009	0.044045677	0.063063063	0.052202284	0.054054054	0.053833605	0.054054054	0.073409462	0.072072072	0.052202284	0.031531532	0.060358891	0.058558559	0.070146819	0.063063063	0.014681892	0.040540541	0.039151713	0.036036036	0.016313214	0.045045045	0.04730832
YPL184C_YGL070C	0	0	16	7	1	1	197787	374830	195949	374462	612	122	5.74	7.53	68.663	14.288	0.057096248	0.032520325	0.070146819	0.016260163	0.061990212	0.06504065	0.017944535	0.024390244	0.057096248	0.073170732	0.003262643	0	0.044045677	0.040650407	0.052202284	0.048780488	0.053833605	0.073170732	0.073409462	0.089430894	0.052202284	0.040650407	0.060358891	0.056910569	0.070146819	0.032520325	0.014681892	0.06504065	0.039151713	0.024390244	0.016313214	0.024390244	0.04730832
YPR042C_YDL110C	0	0	16	4	1	1	653659	264964	650432	264512	1075	150	9.18	4.42	119.507	16.771	0.039962825	0.059602649	0.040892193	0.066225166	0.102230483	0.066225166	0.011152416	0.026490066	0.029739777	0.013245033	0.006505576	0	0.040892193	0.066225166	0.059479554	0.026490066	0.031598513	0.099337748	0.11802974	0.072847682	0.060408922	0.01986755	0.053903346	0.059602649	0.055762082	0.079470199	0.011152416	0.006622517	0.032527881	0.026490066	0.017657993	0.01986755	0.041821561
YPR042C_YJL063C	0	0	16	10	1	1	653659	316469	650432	315753	1075	238	9.18	10.6	119.507	26.945	0.039962825	0.025104603	0.040892193	0.083682008	0.102230483	0.129707113	0.011152416	0.029288703	0.029739777	0.016736402	0.006505576	0.008368201	0.040892193	0.087866109	0.059479554	0.050209205	0.031598513	0.066945607	0.11802974	0.087866109	0.060408922	0.050209205	0.053903346	0.066945607	0.055762082	0.041841004	0.011152416	0.008368201	0.032527881	0.020920502	0.017657993	0.029288703	0.041821561
YPR042C_YCL025C	0	0	16	3	1	1	653659	77919	650432	76018	1075	633	9.18	6.95	119.507	69.671	0.039962825	0.088328076	0.040892193	0.099369085	0.102230483	0.094637224	0.011152416	0.023659306	0.029739777	0.063091483	0.006505576	0.018927445	0.040892193	0.042586751	0.059479554	0.036277603	0.031598513	0.045741325	0.11802974	0.074132492	0.060408922	0.033123028	0.053903346	0.059936909	0.055762082	0.082018927	0.011152416	0.017350158	0.032527881	0.039432177	0.017657993	0.020504732	0.041821561
YPR042C_YDL191W	0	0	16	4	1	0	653659	117665	650432	118518	1075	120	9.18	11.36	119.507	13.909	0.039962825	0.016528926	0.040892193	0.107438017	0.102230483	0.107438017	0.011152416	0.008264463	0.029739777	0.016528926	0.006505576	0	0.040892193	0.181818182	0.059479554	0.090909091	0.031598513	0.066115702	0.11802974	0.049586777	0.060408922	0.033057851	0.053903346	0.066115702	0.055762082	0.041322314	0.011152416	0.008264463	0.032527881	0.033057851	0.017657993	0	0.041821561
YPR042C_YBR139W	0	0	16	2	1	0	653659	515658	650432	517184	1075	508	9.18	5.02	119.507	57.638	0.039962825	0.072691552	0.040892193	0.053045187	0.102230483	0.098231827	0.011152416	0.023575639	0.029739777	0.05697446	0.006505576	0.017681729	0.040892193	0.047151277	0.059479554	0.031434185	0.031598513	0.053045187	0.11802974	0.080550098	0.060408922	0.05108055	0.053903346	0.043222004	0.055762082	0.053045187	0.011152416	0.021611002	0.032527881	0.05697446	0.017657993	0.023575639	0.041821561
YPR042C_YLL001W	0	0	16	12	1	0	653659	147889	650432	150162	1075	757	9.18	5.25	119.507	84.971	0.039962825	0.05408971	0.040892193	0.042216359	0.102230483	0.12005277	0.011152416	0.014511873	0.029739777	0.029023747	0.006505576	0.001319261	0.040892193	0.075197889	0.059479554	0.036939314	0.031598513	0.071240106	0.11802974	0.077836412	0.060408922	0.044854881	0.053903346	0.058047493	0.055762082	0.079155673	0.011152416	0.013192612	0.032527881	0.029023747	0.017657993	0.011873351	0.041821561
YPR042C_YKR048C	0	0	16	11	1	1	653659	526282	650432	525029	1075	417	9.18	4.06	119.507	47.884	0.039962825	0.050239234	0.040892193	0.04784689	0.102230483	0.093301435	0.011152416	0.009569378	0.029739777	0.04784689	0.006505576	0.009569378	0.040892193	0.066985646	0.059479554	0.066985646	0.031598513	0.14354067	0.11802974	0.055023923	0.060408922	0.052631579	0.053903346	0.038277512	0.055762082	0.057416268	0.011152416	0.009569378	0.032527881	0.023923445	0.017657993	0.009569378	0.041821561
YPR042C_YCR090C	0	0	16	3	1	1	653659	272860	650432	272312	1075	182	9.18	4.59	119.507	20.703	0.039962825	0.032786885	0.040892193	0.043715847	0.102230483	0.092896175	0.011152416	0.027322404	0.029739777	0.06010929	0.006505576	0.010928962	0.040892193	0.098360656	0.059479554	0.016393443	0.031598513	0.092896175	0.11802974	0.109289617	0.060408922	0.021857923	0.053903346	0.054644809	0.055762082	0.049180328	0.011152416	0.043715847	0.032527881	0.027322404	0.017657993	0.010928962	0.041821561
YPR042C_YBR067C	0	0	16	2	1	1	653659	372732	650432	372100	1075	210	9.18	4.02	119.507	20.727	0.039962825	0.037914692	0.040892193	0.199052133	0.102230483	0.071090047	0.011152416	0.009478673	0.029739777	0.023696682	0.006505576	0.004739336	0.040892193	0.023696682	0.059479554	0.023696682	0.031598513	0.047393365	0.11802974	0.232227488	0.060408922	0.033175355	0.053903346	0.071090047	0.055762082	0.042654028	0.011152416	0	0.032527881	0.023696682	0.017657993	0.004739336	0.041821561
YPR042C_YBR242W	0	0	16	2	1	0	653659	704665	650432	705381	1075	238	9.18	6.89	119.507	27.576	0.039962825	0.037656904	0.040892193	0.054393305	0.102230483	0.075313808	0.011152416	0.020920502	0.029739777	0.025104603	0.006505576	0.016736402	0.040892193	0.09623431	0.059479554	0.037656904	0.031598513	0.083682008	0.11802974	0.058577406	0.060408922	0.029288703	0.053903346	0.071129707	0.055762082	0.079497908	0.011152416	0.020920502	0.032527881	0.050209205	0.017657993	0.016736402	0.041821561
YPR042C_YOR016C	0	0	16	15	1	1	653659	361084	650432	360461	1075	207	9.18	6.78	119.507	23.515	0.039962825	0.043269231	0.040892193	0.043269231	0.102230483	0.096153846	0.011152416	0.024038462	0.029739777	0.057692308	0.006505576	0.009615385	0.040892193	0.067307692	0.059479554	0.024038462	0.031598513	0.0625	0.11802974	0.110576923	0.060408922	0.019230769	0.053903346	0.072115385	0.055762082	0.091346154	0.011152416	0.009615385	0.032527881	0.043269231	0.017657993	0.014423077	0.041821561
YPR042C_YKL205W	0	0	16	11	1	0	653659	50052	650432	53354	1075	1100	9.18	4.86	119.507	126.818	0.039962825	0.024523161	0.040892193	0.033605813	0.102230483	0.124432334	0.011152416	0.029064487	0.029739777	0.069936421	0.006505576	0.009990917	0.040892193	0.066303361	0.059479554	0.048138056	0.031598513	0.054495913	0.11802974	0.069936421	0.060408922	0.028156222	0.053903346	0.044504995	0.055762082	0.10808356	0.011152416	0.017257039	0.032527881	0.024523161	0.017657993	0.009990917	0.041821561
YPR042C_YBR283C	0	0	16	2	1	1	653659	770411	650432	768939	1075	490	9.18	8.18	119.507	53.311	0.039962825	0.085539715	0.040892193	0.073319756	0.102230483	0.122199593	0.011152416	0.010183299	0.029739777	0.071283096	0.006505576	0.00407332	0.040892193	0.044806517	0.059479554	0.044806517	0.031598513	0.036659878	0.11802974	0.054989817	0.060408922	0.044806517	0.053903346	0.085539715	0.055762082	0.114052953	0.011152416	0.00814664	0.032527881	0.028513238	0.017657993	0.00814664	0.041821561
YPR042C_YBR017C	0	0	16	2	1	1	653659	273703	650432	270947	1075	918	9.18	4.34	119.507	103.68	0.039962825	0.038084875	0.040892193	0.0609358	0.102230483	0.12078346	0.011152416	0.0304679	0.029739777	0.051142546	0.006505576	0.013057671	0.040892193	0.047878128	0.059479554	0.040261153	0.031598513	0.069640914	0.11802974	0.073993471	0.060408922	0.040261153	0.053903346	0.055495103	0.055762082	0.082698585	0.011152416	0.017410229	0.032527881	0.022850925	0.017657993	0.020674646	0.041821561
YPR042C_YDR399W	0	0	16	4	1	0	653659	1270061	650432	1270726	1075	221	9.18	5.48	119.507	25.191	0.039962825	0.04954955	0.040892193	0.072072072	0.102230483	0.072072072	0.011152416	0.018018018	0.029739777	0.040540541	0.006505576	0.013513514	0.040892193	0.09009009	0.059479554	0.045045045	0.031598513	0.081081081	0.11802974	0.045045045	0.060408922	0.045045045	0.053903346	0.067567568	0.055762082	0.085585586	0.011152416	0.009009009	0.032527881	0.036036036	0.017657993	0.022522523	0.041821561
YPR042C_YJL001W	0	0	16	10	1	0	653659	435156	650432	435919	1075	215	9.18	5.73	119.507	23.547	0.039962825	0.092592593	0.040892193	0.078703704	0.102230483	0.064814815	0.011152416	0.018518519	0.029739777	0.027777778	0.006505576	0.009259259	0.040892193	0.064814815	0.059479554	0.027777778	0.031598513	0.055555556	0.11802974	0.074074074	0.060408922	0.018518519	0.053903346	0.074074074	0.055762082	0.078703704	0.011152416	0.018518519	0.032527881	0.055555556	0.017657993	0.018518519	0.041821561
YPR042C_YKL181W	0	0	16	11	1	0	653659	107321	650432	108604	1075	427	9.18	5.53	119.507	47.047	0.039962825	0.074766355	0.040892193	0.070093458	0.102230483	0.081775701	0.011152416	0.025700935	0.029739777	0.023364486	0.006505576	0.002336449	0.040892193	0.053738318	0.059479554	0.035046729	0.031598513	0.063084112	0.11802974	0.077102804	0.060408922	0.035046729	0.053903346	0.074766355	0.055762082	0.086448598	0.011152416	0.018691589	0.032527881	0.023364486	0.017657993	0.028037383	0.041821561
YPR042C_YLR344W	0	0	16	12	1	0	653659	819312	650432	820142	1075	127	9.18	11.35	119.507	14.234	0.039962825	0.0546875	0.040892193	0.078125	0.102230483	0.109375	0.011152416	0.0078125	0.029739777	0.015625	0.006505576	0	0.040892193	0.140625	0.059479554	0.046875	0.031598513	0.0390625	0.11802974	0.09375	0.060408922	0.0390625	0.053903346	0.09375	0.055762082	0.046875	0.011152416	0	0.032527881	0.0234375	0.017657993	0.015625	0.041821561
YPR042C_YOR157C	0	0	16	15	1	1	653659	631752	650432	630967	1075	261	9.18	6.6	119.507	28.268	0.039962825	0.080152672	0.040892193	0.099236641	0.102230483	0.080152672	0.011152416	0.015267176	0.029739777	0.022900763	0.006505576	0.011450382	0.040892193	0.057251908	0.059479554	0.045801527	0.031598513	0.053435115	0.11802974	0.080152672	0.060408922	0.026717557	0.053903346	0.072519084	0.055762082	0.06870229	0.011152416	0.015267176	0.032527881	0.034351145	0.017657993	0.034351145	0.041821561
YPR042C_YMR079W	0	0	16	13	1	0	653659	424988	650432	426058	1075	304	9.18	5.26	119.507	34.9	0.039962825	0.059016393	0.040892193	0.062295082	0.102230483	0.095081967	0.011152416	0.026229508	0.029739777	0.055737705	0.006505576	0.009836066	0.040892193	0.078688525	0.059479554	0.036065574	0.031598513	0.091803279	0.11802974	0.072131148	0.060408922	0.062295082	0.053903346	0.049180328	0.055762082	0.045901639	0.011152416	0.013114754	0.032527881	0.059016393	0.017657993	0.013114754	0.041821561
YPR042C_YKR001C	0	0	16	11	1	1	653659	442365	650432	440251	1075	704	9.18	8.15	119.507	78.736	0.039962825	0.055319149	0.040892193	0.05106383	0.102230483	0.09929078	0.011152416	0.019858156	0.029739777	0.031205674	0.006505576	0.00141844	0.040892193	0.090780142	0.059479554	0.043971631	0.031598513	0.075177305	0.11802974	0.078014184	0.060408922	0.053900709	0.053903346	0.065248227	0.055762082	0.085106383	0.011152416	0.002836879	0.032527881	0.024113475	0.017657993	0.018439716	0.041821561
YPR042C_YDR397C	0	0	16	4	1	1	653659	1266891	650432	1266359	1075	146	9.18	4.72	119.507	16.65	0.039962825	0.027210884	0.040892193	0.054421769	0.102230483	0.095238095	0.011152416	0.040816327	0.029739777	0.047619048	0.006505576	0	0.040892193	0.088435374	0.059479554	0.040816327	0.031598513	0.129251701	0.11802974	0.12244898	0.060408922	0.027210884	0.053903346	0.040816327	0.055762082	0.081632653	0.011152416	0	0.032527881	0.006802721	0.017657993	0.020408163	0.041821561
YPR042C_YBR254C	0	0	16	2	1	1	653659	724258	650432	723731	1075	175	9.18	7.06	119.507	19.7	0.039962825	0.079545455	0.040892193	0.051136364	0.102230483	0.073863636	0.011152416	0.028409091	0.029739777	0.056818182	0.006505576	0.005681818	0.040892193	0.051136364	0.059479554	0.039772727	0.031598513	0.039772727	0.11802974	0.073863636	0.060408922	0.051136364	0.053903346	0.056818182	0.055762082	0.068181818	0.011152416	0.005681818	0.032527881	0.051136364	0.017657993	0.028409091	0.041821561
YPR042C_YNL056W	0	0	16	14	1	0	653659	517250	650432	517843	1075	197	9.18	6.63	119.507	22.472	0.039962825	0.075757576	0.040892193	0.025252525	0.102230483	0.101010101	0.011152416	0.03030303	0.029739777	0.04040404	0.006505576	0.005050505	0.040892193	0.065656566	0.059479554	0.035353535	0.031598513	0.070707071	0.11802974	0.080808081	0.060408922	0.050505051	0.053903346	0.065656566	0.055762082	0.085858586	0.011152416	0.01010101	0.032527881	0.055555556	0.017657993	0.035353535	0.041821561
YPR042C_YCR060W	0	0	16	3	1	0	653659	224395	650432	224730	1075	111	9.18	6.51	119.507	12.511	0.039962825	0.071428571	0.040892193	0.080357143	0.102230483	0.089285714	0.011152416	0.026785714	0.029739777	0.017857143	0.006505576	0	0.040892193	0.053571429	0.059479554	0.125	0.031598513	0.080357143	0.11802974	0.0625	0.060408922	0.035714286	0.053903346	0.071428571	0.055762082	0.044642857	0.011152416	0.017857143	0.032527881	0.0625	0.017657993	0.017857143	0.041821561
YPR042C_YLR052W	0	0	16	12	1	0	653659	247202	650432	247954	1075	250	9.18	6.32	119.507	28.242	0.039962825	0.023904382	0.040892193	0.091633466	0.102230483	0.09561753	0.011152416	0.015936255	0.029739777	0.039840637	0.006505576	0.003984064	0.040892193	0.087649402	0.059479554	0.051792829	0.031598513	0.059760956	0.11802974	0.055776892	0.060408922	0.027888446	0.053903346	0.039840637	0.055762082	0.059760956	0.011152416	0	0.032527881	0.019920319	0.017657993	0.03187251	0.041821561
YPR042C_YDR296W	0	0	16	4	1	0	653659	1055209	650432	1055889	1075	226	9.18	10.3	119.507	26.895	0.039962825	0.026431718	0.040892193	0.044052863	0.102230483	0.083700441	0.011152416	0.013215859	0.029739777	0.035242291	0.006505576	0.030837004	0.040892193	0.088105727	0.059479554	0.066079295	0.031598513	0.066079295	0.11802974	0.074889868	0.060408922	0.052863436	0.053903346	0.074889868	0.055762082	0.039647577	0.011152416	0.017621145	0.032527881	0.04845815	0.017657993	0.026431718	0.041821561
YPR042C_YCL005W	0	0	16	3	1	0	653659	108021	650432	108791	1075	256	9.18	8.07	119.507	29.023	0.039962825	0.038910506	0.040892193	0.046692607	0.102230483	0.093385214	0.011152416	0.027237354	0.029739777	0.062256809	0.006505576	0.019455253	0.040892193	0.031128405	0.059479554	0.035019455	0.031598513	0.023346304	0.11802974	0.077821012	0.060408922	0.062256809	0.053903346	0.073929961	0.055762082	0.089494163	0.011152416	0.019455253	0.032527881	0.023346304	0.017657993	0.019455253	0.041821561
YPR042C_YLL027W	0	0	16	12	1	0	653659	87402	650432	88154	1075	250	9.18	10.82	119.507	27.675	0.039962825	0.059760956	0.040892193	0.071713147	0.102230483	0.059760956	0.011152416	0.015936255	0.029739777	0.047808765	0.006505576	0.011952191	0.040892193	0.119521912	0.059479554	0.027888446	0.031598513	0.043824701	0.11802974	0.111553785	0.060408922	0.06374502	0.053903346	0.051792829	0.055762082	0.067729084	0.011152416	0.019920319	0.032527881	0.011952191	0.017657993	0.011952191	0.041821561
YPR042C_YBR288C	0	0	16	2	1	1	653659	779459	650432	778008	1075	483	9.18	6.67	119.507	54.879	0.039962825	0.055785124	0.040892193	0.030991736	0.102230483	0.103305785	0.011152416	0.01446281	0.029739777	0.045454545	0.006505576	0.008264463	0.040892193	0.07231405	0.059479554	0.049586777	0.031598513	0.055785124	0.11802974	0.090909091	0.060408922	0.030991736	0.053903346	0.068181818	0.055762082	0.074380165	0.011152416	0.01446281	0.032527881	0.041322314	0.017657993	0.020661157	0.041821561
YPR042C_YMR011W	0	0	16	13	1	0	653659	288078	650432	289703	1075	541	9.18	8.31	119.507	59.84	0.039962825	0.097785978	0.040892193	0.066420664	0.102230483	0.068265683	0.011152416	0.036900369	0.029739777	0.079335793	0.006505576	0.018450185	0.040892193	0.044280443	0.059479554	0.027675277	0.031598513	0.044280443	0.11802974	0.081180812	0.060408922	0.031365314	0.053903346	0.08302583	0.055762082	0.088560886	0.011152416	0.020295203	0.032527881	0.044280443	0.017657993	0.003690037	0.041821561
YPR042C_YPR067W	0	0	16	16	1	0	653659	682217	650432	682774	1075	185	9.18	7.79	119.507	20.876	0.039962825	0.048387097	0.040892193	0.02688172	0.102230483	0.112903226	0.011152416	0.005376344	0.029739777	0.053763441	0.006505576	0	0.040892193	0.080645161	0.059479554	0.016129032	0.031598513	0.053763441	0.11802974	0.107526882	0.060408922	0.043010753	0.053903346	0.02688172	0.055762082	0.086021505	0.011152416	0.021505376	0.032527881	0.02688172	0.017657993	0.010752688	0.041821561
YPR042C_YER134C	0	0	16	5	1	1	653659	437799	650432	437263	1075	178	9.18	6.75	119.507	20.441	0.039962825	0.072625698	0.040892193	0.039106145	0.102230483	0.094972067	0.011152416	0.011173184	0.029739777	0.039106145	0.006505576	0.022346369	0.040892193	0.100558659	0.059479554	0.016759777	0.031598513	0.055865922	0.11802974	0.05027933	0.060408922	0.05027933	0.053903346	0.067039106	0.055762082	0.061452514	0.011152416	0.022346369	0.032527881	0.061452514	0.017657993	0.016759777	0.041821561
YPR042C_YML059C	0	0	16	13	1	1	653659	158258	650432	153219	1075	1679	9.18	8.19	119.507	187.131	0.039962825	0.056547619	0.040892193	0.050595238	0.102230483	0.100595238	0.011152416	0.02202381	0.029739777	0.042261905	0.006505576	0.00952381	0.040892193	0.055952381	0.059479554	0.035714286	0.031598513	0.050595238	0.11802974	0.120833333	0.060408922	0.046428571	0.053903346	0.054761905	0.055762082	0.0625	0.011152416	0.005952381	0.032527881	0.033928571	0.017657993	0.029761905	0.041821561
YPR042C_YKL052C	0	0	16	11	1	1	653659	340190	650432	339312	1075	292	9.18	4.44	119.507	32.071	0.039962825	0.058020478	0.040892193	0.054607509	0.102230483	0.054607509	0.011152416	0.020477816	0.029739777	0.023890785	0.006505576	0.003412969	0.040892193	0.04778157	0.059479554	0.061433447	0.031598513	0.088737201	0.11802974	0.109215017	0.060408922	0.051194539	0.053903346	0.04778157	0.055762082	0.061433447	0.011152416	0.006825939	0.032527881	0.006825939	0.017657993	0.040955631	0.041821561
YPR042C_YOR322C	0	0	16	15	1	1	653659	921059	650432	918603	1075	818	9.18	8.76	119.507	89.825	0.039962825	0.053724054	0.040892193	0.043956044	0.102230483	0.075702076	0.011152416	0.021978022	0.029739777	0.021978022	0.006505576	0.006105006	0.040892193	0.057387057	0.059479554	0.047619048	0.031598513	0.062271062	0.11802974	0.135531136	0.060408922	0.072039072	0.053903346	0.068376068	0.055762082	0.051282051	0.011152416	0.00976801	0.032527881	0.020757021	0.017657993	0.025641026	0.041821561
YPR042C_YMR300C	0	0	16	13	1	1	653659	867090	650432	865558	1075	510	9.18	6.22	119.507	56.719	0.039962825	0.080234834	0.040892193	0.076320939	0.102230483	0.074363992	0.011152416	0.019569472	0.029739777	0.039138943	0.006505576	0	0.040892193	0.056751468	0.059479554	0.023483366	0.031598513	0.070450098	0.11802974	0.054794521	0.060408922	0.04109589	0.053903346	0.076320939	0.055762082	0.062622309	0.011152416	0.02739726	0.032527881	0.048923679	0.017657993	0.019569472	0.041821561
YPR042C_YJL167W	0	0	16	10	1	0	653659	105008	650432	106066	1075	352	9.18	5.21	119.507	40.483	0.039962825	0.045325779	0.040892193	0.079320113	0.102230483	0.104815864	0.011152416	0.019830028	0.029739777	0.045325779	0.006505576	0.011331445	0.040892193	0.099150142	0.059479554	0.039660057	0.031598513	0.087818697	0.11802974	0.050991501	0.060408922	0.025495751	0.053903346	0.056657224	0.055762082	0.065155807	0.011152416	0.016997167	0.032527881	0.056657224	0.017657993	0.014164306	0.041821561
YPR042C_YOL010W	0	0	16	15	1	0	653659	307939	650432	309042	1075	367	9.18	9.41	119.507	40.17	0.039962825	0.089673913	0.040892193	0.059782609	0.102230483	0.078804348	0.011152416	0.02173913	0.029739777	0.035326087	0.006505576	0.010869565	0.040892193	0.078804348	0.059479554	0.024456522	0.031598513	0.065217391	0.11802974	0.08423913	0.060408922	0.048913043	0.053903346	0.070652174	0.055762082	0.108695652	0.011152416	0.010869565	0.032527881	0.024456522	0.017657993	0.013586957	0.041821561
YPR042C_YOR234C	0	0	16	15	1	1	653659	779406	650432	778556	1075	107	9.18	11.76	119.507	12.168	0.039962825	0.074074074	0.040892193	0.074074074	0.102230483	0.055555556	0.011152416	0.018518519	0.029739777	0.037037037	0.006505576	0.009259259	0.040892193	0.083333333	0.059479554	0.027777778	0.031598513	0.037037037	0.11802974	0.083333333	0.060408922	0.037037037	0.053903346	0.101851852	0.055762082	0.055555556	0.011152416	0	0.032527881	0.055555556	0.017657993	0.027777778	0.041821561
YPR042C_YGL087C	0	0	16	7	1	1	653659	346907	650432	346409	1075	137	9.18	6.76	119.507	15.545	0.039962825	0.065217391	0.040892193	0.028985507	0.102230483	0.094202899	0.011152416	0.028985507	0.029739777	0.036231884	0.006505576	0.014492754	0.040892193	0.079710145	0.059479554	0.014492754	0.031598513	0.079710145	0.11802974	0.065217391	0.060408922	0.086956522	0.053903346	0.028985507	0.055762082	0.043478261	0.011152416	0.02173913	0.032527881	0.028985507	0.017657993	0.02173913	0.041821561
YPR042C_YMR080C	0	0	16	13	1	1	653659	429626	650432	426711	1075	971	9.18	6.45	119.507	109.429	0.039962825	0.054526749	0.040892193	0.060699588	0.102230483	0.101851852	0.011152416	0.014403292	0.029739777	0.040123457	0.006505576	0.013374486	0.040892193	0.061728395	0.059479554	0.051440329	0.031598513	0.067901235	0.11802974	0.082304527	0.060408922	0.04526749	0.053903346	0.066872428	0.055762082	0.055555556	0.011152416	0.019547325	0.032527881	0.028806584	0.017657993	0.022633745	0.041821561
YPR042C_YGL012W	0	0	16	7	1	0	653659	472860	650432	474281	1075	473	9.18	8.77	119.507	56.039	0.039962825	0.063291139	0.040892193	0.050632911	0.102230483	0.109704641	0.011152416	0.03164557	0.029739777	0.082278481	0.006505576	0.042194093	0.040892193	0.063291139	0.059479554	0.03164557	0.031598513	0.035864979	0.11802974	0.033755274	0.060408922	0.048523207	0.053903346	0.056962025	0.055762082	0.05907173	0.011152416	0.025316456	0.032527881	0.080168776	0.017657993	0.03164557	0.041821561
YPR042C_YLR193C	0	0	16	12	1	1	653659	540538	650432	540011	1075	175	9.18	10.58	119.507	20.108	0.039962825	0.039772727	0.040892193	0.039772727	0.102230483	0.056818182	0.011152416	0.034090909	0.029739777	0.0625	0.006505576	0.017045455	0.040892193	0.079545455	0.059479554	0.022727273	0.031598513	0.051136364	0.11802974	0.102272727	0.060408922	0.045454545	0.053903346	0.073863636	0.055762082	0.056818182	0.011152416	0	0.032527881	0.028409091	0.017657993	0.022727273	0.041821561
YPR042C_YBL035C	0	0	16	2	1	1	653659	153613	650432	151496	1075	705	9.18	7.04	119.507	78.774	0.039962825	0.050991501	0.040892193	0.045325779	0.102230483	0.089235127	0.011152416	0.012747875	0.029739777	0.050991501	0.006505576	0.002832861	0.040892193	0.07223796	0.059479554	0.049575071	0.031598513	0.062322946	0.11802974	0.100566572	0.060408922	0.066572238	0.053903346	0.058073654	0.055762082	0.067988669	0.011152416	0.005665722	0.032527881	0.028328612	0.017657993	0.019830028	0.041821561
YPR042C_YPL063W	0	0	16	16	1	0	653659	429936	650432	431366	1075	476	9.18	7.29	119.507	55.098	0.039962825	0.050314465	0.040892193	0.046121593	0.102230483	0.098532495	0.011152416	0.029350105	0.029739777	0.046121593	0.006505576	0.012578616	0.040892193	0.106918239	0.059479554	0.041928721	0.031598513	0.088050314	0.11802974	0.077568134	0.060408922	0.054507338	0.053903346	0.037735849	0.055762082	0.048218029	0.011152416	0.002096436	0.032527881	0.044025157	0.017657993	0.016771488	0.041821561
YPR042C_YLR406C	0	0	16	12	1	1	653659	931754	650432	931064	1075	113	9.18	10.8	119.507	12.967	0.039962825	0.052631579	0.040892193	0.087719298	0.102230483	0.096491228	0.011152416	0.01754386	0.029739777	0.026315789	0.006505576	0.00877193	0.040892193	0.114035088	0.059479554	0.01754386	0.031598513	0.096491228	0.11802974	0.035087719	0.060408922	0.035087719	0.053903346	0.114035088	0.055762082	0.035087719	0.011152416	0	0.032527881	0.026315789	0.017657993	0.026315789	0.041821561
YPR042C_YDR477W	0	0	16	4	1	0	653659	1412366	650432	1414267	1075	633	9.18	6.65	119.507	72.045	0.039962825	0.045741325	0.040892193	0.052050473	0.102230483	0.086750789	0.011152416	0.029968454	0.029739777	0.031545741	0.006505576	0.011041009	0.040892193	0.075709779	0.059479554	0.03785489	0.031598513	0.066246057	0.11802974	0.093059937	0.060408922	0.047318612	0.053903346	0.045741325	0.055762082	0.074132492	0.011152416	0.006309148	0.032527881	0.036277603	0.017657993	0.048895899	0.041821561
YPR042C_YIL052C	0	0	16	9	1	1	653659	257061	650432	256224	1075	121	9.18	11.56	119.507	13.641	0.039962825	0.057377049	0.040892193	0.081967213	0.102230483	0.040983607	0.011152416	0.008196721	0.029739777	0.016393443	0.006505576	0	0.040892193	0.155737705	0.059479554	0.049180328	0.031598513	0.049180328	0.11802974	0.06557377	0.060408922	0.032786885	0.053903346	0.090163934	0.055762082	0.049180328	0.011152416	0.032786885	0.032527881	0.024590164	0.017657993	0.016393443	0.041821561
YPR042C_YKL157W	0	0	16	11	1	0	653659	154996	650432	158186	1075	935	9.18	7.96	119.507	105.584	0.039962825	0.052350427	0.040892193	0.068376068	0.102230483	0.08974359	0.011152416	0.02457265	0.029739777	0.051282051	0.006505576	0.02457265	0.040892193	0.083333333	0.059479554	0.033119658	0.031598513	0.058760684	0.11802974	0.080128205	0.060408922	0.040598291	0.053903346	0.071581197	0.055762082	0.050213675	0.011152416	0.007478632	0.032527881	0.02991453	0.017657993	0.016025641	0.041821561
YPR042C_YPL032C	0	0	16	16	1	1	653659	491362	650432	488885	1075	825	9.18	9.39	119.507	92.143	0.039962825	0.030266344	0.040892193	0.049636804	0.102230483	0.090799031	0.011152416	0.023002421	0.029739777	0.043583535	0.006505576	0.003631961	0.040892193	0.062953995	0.059479554	0.07748184	0.031598513	0.054479419	0.11802974	0.13559322	0.060408922	0.061743341	0.053903346	0.035108959	0.055762082	0.060532688	0.011152416	0.003631961	0.032527881	0.016949153	0.017657993	0.024213075	0.041821561
YPR042C_YMR260C	0	0	16	13	1	1	653659	789838	650432	789377	1075	153	9.18	4.53	119.507	17.435	0.039962825	0.11038961	0.040892193	0.038961039	0.102230483	0.058441558	0.011152416	0.025974026	0.029739777	0.038961039	0.006505576	0.006493506	0.040892193	0.103896104	0.059479554	0.038961039	0.031598513	0.116883117	0.11802974	0.025974026	0.060408922	0.012987013	0.053903346	0.038961039	0.055762082	0.051948052	0.011152416	0.012987013	0.032527881	0.019480519	0.017657993	0.012987013	0.041821561
YPR042C_YFL046W	0	0	16	6	1	0	653659	42815	650432	43438	1075	207	9.18	7.64	119.507	24.018	0.039962825	0.043269231	0.040892193	0.043269231	0.102230483	0.115384615	0.011152416	0.028846154	0.029739777	0.043269231	0.006505576	0.004807692	0.040892193	0.076923077	0.059479554	0.0625	0.031598513	0.081730769	0.11802974	0.052884615	0.060408922	0.009615385	0.053903346	0.057692308	0.055762082	0.067307692	0.011152416	0.009615385	0.032527881	0.014423077	0.017657993	0.033653846	0.041821561
YPR042C_YDR280W	0	0	16	4	1	0	653659	1020744	650432	1021661	1075	305	9.18	4.83	119.507	33.962	0.039962825	0.065359477	0.040892193	0.062091503	0.102230483	0.075163399	0.011152416	0.026143791	0.029739777	0.045751634	0.006505576	0.003267974	0.040892193	0.058823529	0.059479554	0.032679739	0.031598513	0.094771242	0.11802974	0.068627451	0.060408922	0.032679739	0.053903346	0.071895425	0.055762082	0.094771242	0.011152416	0.032679739	0.032527881	0.013071895	0.017657993	0.022875817	0.041821561
YPR042C_YHR063C	0	0	16	8	1	1	653659	225171	650432	224032	1075	379	9.18	6.61	119.507	42.821	0.039962825	0.055263158	0.040892193	0.057894737	0.102230483	0.105263158	0.011152416	0.028947368	0.029739777	0.042105263	0.006505576	0.007894737	0.040892193	0.063157895	0.059479554	0.034210526	0.031598513	0.071052632	0.11802974	0.055263158	0.060408922	0.042105263	0.053903346	0.068421053	0.055762082	0.065789474	0.011152416	0.023684211	0.032527881	0.034210526	0.017657993	0.018421053	0.041821561
YPR042C_YDR450W	0	0	16	4	1	0	653659	1359916	650432	1360791	1075	146	9.18	11.06	119.507	17.037	0.039962825	0.068027211	0.040892193	0.047619048	0.102230483	0.102040816	0.011152416	0.013605442	0.029739777	0.020408163	0.006505576	0.013605442	0.040892193	0.074829932	0.059479554	0.054421769	0.031598513	0.047619048	0.11802974	0.027210884	0.060408922	0.013605442	0.053903346	0.068027211	0.055762082	0.068027211	0.011152416	0.006802721	0.032527881	0.027210884	0.017657993	0.047619048	0.041821561
YPR042C_YER083C	0	0	16	5	1	1	653659	327027	650432	326170	1075	285	9.18	10.29	119.507	31.493	0.039962825	0.041958042	0.040892193	0.090909091	0.102230483	0.15034965	0.011152416	0.017482517	0.029739777	0.038461538	0.006505576	0.017482517	0.040892193	0.062937063	0.059479554	0.045454545	0.031598513	0.034965035	0.11802974	0.101398601	0.060408922	0.066433566	0.053903346	0.045454545	0.055762082	0.048951049	0.011152416	0	0.032527881	0.031468531	0.017657993	0.013986014	0.041821561
YPR042C_YNL264C	0	0	16	14	1	1	653659	146616	650432	145564	1075	350	9.18	7.21	119.507	40.677	0.039962825	0.045584046	0.040892193	0.062678063	0.102230483	0.102564103	0.011152416	0.028490028	0.029739777	0.048433048	0.006505576	0.01994302	0.040892193	0.094017094	0.059479554	0.028490028	0.031598513	0.065527066	0.11802974	0.028490028	0.060408922	0.065527066	0.053903346	0.056980057	0.055762082	0.048433048	0.011152416	0.011396011	0.032527881	0.03988604	0.017657993	0.022792023	0.041821561
YPR042C_YIL039W	0	0	16	9	1	0	653659	278425	650432	279846	1075	473	9.18	5.58	119.507	54.927	0.039962825	0.061181435	0.040892193	0.037974684	0.102230483	0.075949367	0.011152416	0.018987342	0.029739777	0.061181435	0.006505576	0.033755274	0.040892193	0.054852321	0.059479554	0.037974684	0.031598513	0.063291139	0.11802974	0.065400844	0.060408922	0.040084388	0.053903346	0.05907173	0.055762082	0.05907173	0.011152416	0.012658228	0.032527881	0.046413502	0.017657993	0.037974684	0.041821561
YPR042C_YJL145W	0	0	16	10	1	0	653659	145156	650432	146040	1075	294	9.18	8.04	119.507	34.388	0.039962825	0.061016949	0.040892193	0.030508475	0.102230483	0.091525424	0.011152416	0.013559322	0.029739777	0.044067797	0.006505576	0.013559322	0.040892193	0.122033898	0.059479554	0.044067797	0.031598513	0.06440678	0.11802974	0.033898305	0.060408922	0.023728814	0.053903346	0.077966102	0.055762082	0.054237288	0.011152416	0.016949153	0.032527881	0.077966102	0.017657993	0.010169492	0.041821561
YPR042C_YML001W	0	0	16	13	1	0	653659	267174	650432	267800	1075	208	9.18	4.62	119.507	23.043	0.039962825	0.052631579	0.040892193	0.090909091	0.102230483	0.066985646	0.011152416	0.014354067	0.029739777	0.04784689	0.006505576	0.009569378	0.040892193	0.071770335	0.059479554	0.043062201	0.031598513	0.066985646	0.11802974	0.086124402	0.060408922	0.014354067	0.053903346	0.076555024	0.055762082	0.062200957	0.011152416	0.019138756	0.032527881	0.028708134	0.017657993	0.009569378	0.041821561
YPR042C_YOR167C	0	0	16	15	1	1	653659	649008	650432	648805	1075	67	9.18	11.42	119.507	7.592	0.039962825	0.073529412	0.040892193	0.029411765	0.102230483	0.088235294	0.011152416	0.029411765	0.029739777	0.014705882	0.006505576	0	0.040892193	0.058823529	0.059479554	0.014705882	0.031598513	0.088235294	0.11802974	0.044117647	0.060408922	0.029411765	0.053903346	0.147058824	0.055762082	0.044117647	0.011152416	0	0.032527881	0	0.017657993	0	0.041821561
YKL214C_YBL058W	0	0	11	2	1	0	31694	111439	31083	112710	203	423	10.2	4.72	23.777	46.987	0.049019608	0.077830189	0.049019608	0.066037736	0.053921569	0.066037736	0.019607843	0.016509434	0.029411765	0.04009434	0	0.007075472	0.088235294	0.054245283	0.024509804	0.058962264	0.093137255	0.08254717	0.073529412	0.089622642	0.058823529	0.056603774	0.034313725	0.047169811	0.058823529	0.025943396	0.004901961	0.004716981	0.039215686	0.028301887	0.039215686	0.014150943	0.112745098
YKL214C_YLR018C	0	0	11	12	1	1	31694	179605	31083	178706	203	299	10.2	10.62	23.777	34.232	0.049019608	0.04	0.049019608	0.036666667	0.053921569	0.12	0.019607843	0.033333333	0.029411765	0.046666667	0	0.013333333	0.088235294	0.076666667	0.024509804	0.063333333	0.093137255	0.03	0.073529412	0.093333333	0.058823529	0.05	0.034313725	0.046666667	0.058823529	0.046666667	0.004901961	0.003333333	0.039215686	0.026666667	0.039215686	0.04	0.112745098
YIR001C_YML008C	0	0	9	13	1	1	356892	252990	356140	251839	250	383	10.13	5.6	28.954	43.431	0.047808765	0.075520833	0.035856574	0.09375	0.051792829	0.0703125	0.011952191	0.028645833	0.035856574	0.049479167	0.007968127	0.013020833	0.111553785	0.078125	0.071713147	0.03125	0.067729084	0.0859375	0.079681275	0.046875	0.071713147	0.028645833	0.035856574	0.0625	0.043824701	0.03125	0.003984064	0.010416667	0.059760956	0.059895833	0.019920319	0.020833333	0.039840637
YIR001C_YPR004C	0	0	9	16	1	1	356892	565038	356140	564004	250	344	10.13	8.66	28.954	36.802	0.047808765	0.057971014	0.035856574	0.095652174	0.051792829	0.113043478	0.011952191	0.008695652	0.035856574	0.026086957	0.007968127	0.002898551	0.111553785	0.089855072	0.071713147	0.028985507	0.067729084	0.049275362	0.079681275	0.095652174	0.071713147	0.052173913	0.035856574	0.084057971	0.043824701	0.069565217	0.003984064	0.017391304	0.059760956	0.023188406	0.019920319	0.008695652	0.039840637
YKL130C_YLR090W	0	0	11	12	1	0	196027	320702	195287	322081	246	459	4.7	6.14	28.251	51.346	0.028340081	0.07826087	0.052631579	0.05	0.133603239	0.073913043	0.012145749	0.008695652	0.060728745	0.05	0.012145749	0.008695652	0.076923077	0.095652174	0.028340081	0.02173913	0.085020243	0.067391304	0.076923077	0.069565217	0.016194332	0.041304348	0.060728745	0.045652174	0.072874494	0.058695652	0.016194332	0.02826087	0.028340081	0.02826087	0.020242915	0.032608696	0.028340081
YKL130C_YDL097C	0	0	11	4	1	1	196027	286695	195287	285391	246	434	4.7	6.22	28.251	49.773	0.028340081	0.029885057	0.052631579	0.068965517	0.133603239	0.131034483	0.012145749	0.022988506	0.060728745	0.036781609	0.012145749	0.002298851	0.076923077	0.098850575	0.028340081	0.048275862	0.085020243	0.08045977	0.076923077	0.082758621	0.016194332	0.016091954	0.060728745	0.055172414	0.072874494	0.048275862	0.016194332	0.013793103	0.028340081	0.052873563	0.020242915	0.022988506	0.028340081
YKL130C_YJR025C	0	0	11	10	1	1	196027	471663	195287	471130	246	177	4.7	5.65	28.251	20.235	0.028340081	0.073033708	0.052631579	0.02247191	0.133603239	0.073033708	0.012145749	0.02247191	0.060728745	0.039325843	0.012145749	0.016853933	0.076923077	0.06741573	0.028340081	0.033707865	0.085020243	0.078651685	0.076923077	0.033707865	0.016194332	0.06741573	0.060728745	0.078651685	0.072874494	0.061797753	0.016194332	0.028089888	0.028340081	0.033707865	0.020242915	0.033707865	0.028340081
YKL130C_YBR162C	0	0	11	2	1	1	196027	564565	195287	563198	246	455	4.7	4.33	28.251	47.994	0.028340081	0.089912281	0.052631579	0.085526316	0.133603239	0.050438596	0.012145749	0.01754386	0.060728745	0.041666667	0.012145749	0.010964912	0.076923077	0.037280702	0.028340081	0.039473684	0.085020243	0.048245614	0.076923077	0.162280702	0.016194332	0.026315789	0.060728745	0.067982456	0.072874494	0.041666667	0.016194332	0.026315789	0.028340081	0.037280702	0.020242915	0.01754386	0.028340081
YKL130C_YGL101W	0	0	11	7	1	0	196027	312196	195287	312843	246	215	4.7	5.5	28.251	25.297	0.028340081	0.032407407	0.052631579	0.041666667	0.133603239	0.092592593	0.012145749	0.027777778	0.060728745	0.032407407	0.012145749	0.018518519	0.076923077	0.087962963	0.028340081	0.041666667	0.085020243	0.087962963	0.076923077	0.046296296	0.016194332	0.037037037	0.060728745	0.041666667	0.072874494	0.083333333	0.016194332	0.027777778	0.028340081	0.037037037	0.020242915	0.023148148	0.028340081
YKL130C_YMR260C	0	0	11	13	1	1	196027	789838	195287	789377	246	153	4.7	4.53	28.251	17.435	0.028340081	0.11038961	0.052631579	0.038961039	0.133603239	0.058441558	0.012145749	0.025974026	0.060728745	0.038961039	0.012145749	0.006493506	0.076923077	0.103896104	0.028340081	0.038961039	0.085020243	0.116883117	0.076923077	0.025974026	0.016194332	0.012987013	0.060728745	0.038961039	0.072874494	0.051948052	0.016194332	0.012987013	0.028340081	0.019480519	0.020242915	0.012987013	0.028340081
YKL130C_YOR157C	0	0	11	15	1	1	196027	631752	195287	630967	246	261	4.7	6.6	28.251	28.268	0.028340081	0.080152672	0.052631579	0.099236641	0.133603239	0.080152672	0.012145749	0.015267176	0.060728745	0.022900763	0.012145749	0.011450382	0.076923077	0.057251908	0.028340081	0.045801527	0.085020243	0.053435115	0.076923077	0.080152672	0.016194332	0.026717557	0.060728745	0.072519084	0.072874494	0.06870229	0.016194332	0.015267176	0.028340081	0.034351145	0.020242915	0.034351145	0.028340081
YKL130C_YHR201C	0	0	11	8	1	1	196027	501143	195287	499950	246	397	4.7	5.48	28.251	45.051	0.028340081	0.060301508	0.052631579	0.045226131	0.133603239	0.108040201	0.012145749	0.020100503	0.060728745	0.037688442	0.012145749	0.007537688	0.076923077	0.08040201	0.028340081	0.037688442	0.085020243	0.085427136	0.076923077	0.087939698	0.016194332	0.022613065	0.060728745	0.08040201	0.072874494	0.067839196	0.016194332	0.012562814	0.028340081	0.035175879	0.020242915	0.01758794	0.028340081
YKL130C_YMR142C	0	0	11	13	1	1	196027	551206	195287	550205	246	199	4.7	11.71	28.251	22.525	0.028340081	0.04	0.052631579	0.165	0.133603239	0.055	0.012145749	0.005	0.060728745	0.04	0.012145749	0.005	0.076923077	0.1	0.028340081	0.045	0.085020243	0.07	0.076923077	0.03	0.016194332	0.045	0.060728745	0.07	0.072874494	0.05	0.016194332	0	0.028340081	0.015	0.020242915	0.02	0.028340081
YKL130C_YDL124W	0	0	11	4	1	0	196027	240259	195287	241197	246	312	4.7	6.1	28.251	35.56	0.028340081	0.047923323	0.052631579	0.067092652	0.133603239	0.102236422	0.012145749	0.012779553	0.060728745	0.044728435	0.012145749	0.012779553	0.076923077	0.089456869	0.028340081	0.057507987	0.085020243	0.076677316	0.076923077	0.067092652	0.016194332	0.051118211	0.060728745	0.057507987	0.072874494	0.067092652	0.016194332	0.003194888	0.028340081	0.051118211	0.020242915	0.015974441	0.028340081
YKL130C_YBR079C	0	0	11	2	1	1	196027	398271	195287	395377	246	964	4.7	6.24	28.251	110.343	0.028340081	0.026943005	0.052631579	0.095336788	0.133603239	0.09119171	0.012145749	0.019689119	0.060728745	0.027979275	0.012145749	0.006217617	0.076923077	0.099481865	0.028340081	0.043523316	0.085020243	0.117098446	0.076923077	0.066321244	0.016194332	0.037305699	0.060728745	0.058031088	0.072874494	0.055958549	0.016194332	0.001036269	0.028340081	0.032124352	0.020242915	0.01865285	0.028340081
YKL130C_YHR018C	0	0	11	8	1	1	196027	141395	195287	140004	246	463	4.7	5.55	28.251	51.989	0.028340081	0.084051724	0.052631579	0.066810345	0.133603239	0.122844828	0.012145749	0.028017241	0.060728745	0.043103448	0.012145749	0.010775862	0.076923077	0.058189655	0.028340081	0.034482759	0.085020243	0.068965517	0.076923077	0.058189655	0.016194332	0.025862069	0.060728745	0.047413793	0.072874494	0.051724138	0.016194332	0.00862069	0.028340081	0.034482759	0.020242915	0.028017241	0.028340081
YBL032W_YJL062W	0	0	2	10	0	0	160187	317278	161332	319770	381	830	5.97	6.04	41.683	94.85	0.062827225	0.0433213	0.081151832	0.057761733	0.065445026	0.126353791	0.007853403	0.026474128	0.034031414	0.080625752	0	0.028880866	0.078534031	0.037304452	0.018324607	0.050541516	0.091623037	0.027677497	0.089005236	0.077015644	0.041884817	0.039711191	0.057591623	0.06377858	0.102094241	0.08423586	0.005235602	0.013237064	0.015706806	0.030084236	0.020942408	0.026474128	0.047120419
YBL032W_YKR001C	0	0	2	11	0	1	160187	442365	161332	440251	381	704	5.97	8.15	41.683	78.736	0.062827225	0.055319149	0.081151832	0.05106383	0.065445026	0.09929078	0.007853403	0.019858156	0.034031414	0.031205674	0	0.00141844	0.078534031	0.090780142	0.018324607	0.043971631	0.091623037	0.075177305	0.089005236	0.078014184	0.041884817	0.053900709	0.057591623	0.065248227	0.102094241	0.085106383	0.005235602	0.002836879	0.015706806	0.024113475	0.020942408	0.018439716	0.047120419
YBL032W_YNL056W	0	0	2	14	0	0	160187	517250	161332	517843	381	197	5.97	6.63	41.683	22.472	0.062827225	0.075757576	0.081151832	0.025252525	0.065445026	0.101010101	0.007853403	0.03030303	0.034031414	0.04040404	0	0.005050505	0.078534031	0.065656566	0.018324607	0.035353535	0.091623037	0.070707071	0.089005236	0.080808081	0.041884817	0.050505051	0.057591623	0.065656566	0.102094241	0.085858586	0.005235602	0.01010101	0.015706806	0.055555556	0.020942408	0.035353535	0.047120419
YBL032W_YML038C	0	0	2	13	0	1	160187	204103	161332	202775	381	442	5.97	7.46	41.683	49.614	0.062827225	0.060948081	0.081151832	0.047404063	0.065445026	0.128668172	0.007853403	0.022573363	0.034031414	0.072234763	0	0.015801354	0.078534031	0.047404063	0.018324607	0.036117381	0.091623037	0.040632054	0.089005236	0.085778781	0.041884817	0.036117381	0.057591623	0.083521445	0.102094241	0.083521445	0.005235602	0.011286682	0.015706806	0.033860045	0.020942408	0.015801354	0.047120419
YBL032W_YMR153W	0	0	2	13	0	0	160187	564434	161332	565861	381	475	5.97	10.33	41.683	52.618	0.062827225	0.052521008	0.081151832	0.06092437	0.065445026	0.075630252	0.007853403	0.008403361	0.034031414	0.048319328	0	0.014705882	0.078534031	0.096638655	0.018324607	0.042016807	0.091623037	0.054621849	0.089005236	0.132352941	0.041884817	0.056722689	0.057591623	0.033613445	0.102094241	0.056722689	0.005235602	0.00210084	0.015706806	0.012605042	0.020942408	0.010504202	0.047120419
YBL032W_YJL196C	0	0	2	10	0	1	160187	68781	161332	67849	381	310	5.97	10.2	41.683	36.234	0.062827225	0.041800643	0.081151832	0.07073955	0.065445026	0.115755627	0.007853403	0.035369775	0.034031414	0.07073955	0	0.032154341	0.078534031	0.057877814	0.018324607	0.032154341	0.091623037	0.028938907	0.089005236	0.051446945	0.041884817	0.035369775	0.057591623	0.096463023	0.102094241	0.051446945	0.005235602	0.022508039	0.015706806	0.07073955	0.020942408	0.022508039	0.047120419
YBL032W_YGR008C	0	0	2	7	0	1	160187	508368	161332	508114	381	84	5.97	9.08	41.683	9.615	0.062827225	0.117647059	0.081151832	0.011764706	0.065445026	0.023529412	0.007853403	0.011764706	0.034031414	0.035294118	0	0.023529412	0.078534031	0.129411765	0.018324607	0.047058824	0.091623037	0.094117647	0.089005236	0.058823529	0.041884817	0.058823529	0.057591623	0.023529412	0.102094241	0.047058824	0.005235602	0	0.015706806	0.023529412	0.020942408	0.035294118	0.047120419
YBL032W_YER018C	0	0	2	5	0	1	160187	192623	161332	191958	381	221	5.97	6.91	41.683	25.244	0.062827225	0.036036036	0.081151832	0.121621622	0.065445026	0.121621622	0.007853403	0.022522523	0.034031414	0.027027027	0	0.013513514	0.078534031	0.013513514	0.018324607	0.126126126	0.091623037	0.058558559	0.089005236	0.063063063	0.041884817	0.013513514	0.057591623	0.063063063	0.102094241	0.022522523	0.005235602	0.009009009	0.015706806	0.009009009	0.020942408	0.04954955	0.047120419
YBL032W_YMR123W	0	0	2	13	0	0	160187	513592	161332	513960	381	122	5.97	6.79	41.683	13.962	0.062827225	0.024390244	0.081151832	0.081300813	0.065445026	0.113821138	0.007853403	0.008130081	0.034031414	0.056910569	0	0.032520325	0.078534031	0.073170732	0.018324607	0.032520325	0.091623037	0.056910569	0.089005236	0.097560976	0.041884817	0.016260163	0.057591623	0.048780488	0.102094241	0.081300813	0.005235602	0.008130081	0.015706806	0.016260163	0.020942408	0.024390244	0.047120419
YBL032W_YHR133C	0	0	2	8	0	1	160187	371600	161332	370725	381	291	5.97	9.21	41.683	32.214	0.062827225	0.075342466	0.081151832	0.078767123	0.065445026	0.116438356	0.007853403	0.017123288	0.034031414	0.095890411	0	0.01369863	0.078534031	0.065068493	0.018324607	0.02739726	0.091623037	0.030821918	0.089005236	0.082191781	0.041884817	0.04109589	0.057591623	0.051369863	0.102094241	0.075342466	0.005235602	0.01369863	0.015706806	0.02739726	0.020942408	0.01369863	0.047120419
YBL032W_YBR046C	0	0	2	2	0	1	160187	331509	161332	330505	381	334	5.97	9.46	41.683	37.018	0.062827225	0.080597015	0.081151832	0.074626866	0.065445026	0.095522388	0.007853403	0.008955224	0.034031414	0.03880597	0	0.002985075	0.078534031	0.101492537	0.018324607	0.029850746	0.091623037	0.068656716	0.089005236	0.068656716	0.041884817	0.041791045	0.057591623	0.074626866	0.102094241	0.074626866	0.005235602	0.005970149	0.015706806	0.065671642	0.020942408	0.005970149	0.047120419
YBL032W_YDR165W	0	0	2	4	0	0	160187	784869	161332	786203	381	444	5.97	6.7	41.683	50.488	0.062827225	0.040449438	0.081151832	0.047191011	0.065445026	0.078651685	0.007853403	0.006741573	0.034031414	0.058426966	0	0.011235955	0.078534031	0.094382022	0.018324607	0.038202247	0.091623037	0.058426966	0.089005236	0.103370787	0.041884817	0.035955056	0.057591623	0.051685393	0.102094241	0.08988764	0.005235602	0.015730337	0.015706806	0.029213483	0.020942408	0.029213483	0.047120419
YBL032W_YOR341W	0	0	2	15	0	0	160187	960984	161332	965978	381	1664	5.97	7.05	41.683	186.43	0.062827225	0.057657658	0.081151832	0.061861862	0.065445026	0.085885886	0.007853403	0.025825826	0.034031414	0.036636637	0	0.004804805	0.078534031	0.078078078	0.018324607	0.039039039	0.091623037	0.066666667	0.089005236	0.079279279	0.041884817	0.038438438	0.057591623	0.069069069	0.102094241	0.055255255	0.005235602	0.014414414	0.015706806	0.032432432	0.020942408	0.022222222	0.047120419
YBL032W_YKL052C	0	0	2	11	0	1	160187	340190	161332	339312	381	292	5.97	4.44	41.683	32.071	0.062827225	0.058020478	0.081151832	0.054607509	0.065445026	0.054607509	0.007853403	0.020477816	0.034031414	0.023890785	0	0.003412969	0.078534031	0.04778157	0.018324607	0.061433447	0.091623037	0.088737201	0.089005236	0.109215017	0.041884817	0.051194539	0.057591623	0.04778157	0.102094241	0.061433447	0.005235602	0.006825939	0.015706806	0.006825939	0.020942408	0.040955631	0.047120419
YBL032W_YCR065W	0	1	2	3	0	0	160187	229306	161332	231000	381	564	5.97	7.36	41.683	63.647	0.062827225	0.046017699	0.081151832	0.038938053	0.065445026	0.09380531	0.007853403	0.015929204	0.034031414	0.033628319	0	0.008849558	0.078534031	0.074336283	0.018324607	0.042477876	0.091623037	0.067256637	0.089005236	0.116814159	0.041884817	0.072566372	0.057591623	0.031858407	0.102094241	0.053097345	0.005235602	0.007079646	0.015706806	0.030088496	0.020942408	0.03539823	0.047120419
YBL032W_YHR141C	0	0	2	8	0	1	160187	382754	161332	381993	381	106	5.97	11.38	41.683	12.212	0.062827225	0.08411215	0.081151832	0.056074766	0.065445026	0.065420561	0.007853403	0.009345794	0.034031414	0.046728972	0	0	0.078534031	0.214953271	0.018324607	0.08411215	0.091623037	0.028037383	0.089005236	0.018691589	0.041884817	0.018691589	0.057591623	0.065420561	0.102094241	0	0.005235602	0.046728972	0.015706806	0.028037383	0.020942408	0.037383178	0.047120419
YBL032W_YOL092W	0	0	2	15	0	0	160187	144204	161332	145130	381	308	5.97	4.61	41.683	34.872	0.062827225	0.055016181	0.081151832	0.045307443	0.065445026	0.122977346	0.007853403	0.025889968	0.034031414	0.071197411	0	0.022653722	0.078534031	0.029126214	0.018324607	0.042071197	0.091623037	0.038834951	0.089005236	0.087378641	0.041884817	0.051779935	0.057591623	0.077669903	0.102094241	0.097087379	0.005235602	0.01618123	0.015706806	0.038834951	0.020942408	0.009708738	0.047120419
YBL032W_YBR127C	0	0	2	2	0	1	160187	492816	161332	491263	381	517	5.97	4.79	41.683	57.749	0.062827225	0.071428571	0.081151832	0.069498069	0.065445026	0.081081081	0.007853403	0.023166023	0.034031414	0.038610039	0	0.001930502	0.078534031	0.05019305	0.018324607	0.030888031	0.091623037	0.084942085	0.089005236	0.063706564	0.041884817	0.052123552	0.057591623	0.05984556	0.102094241	0.081081081	0.005235602	0.001930502	0.015706806	0.036679537	0.020942408	0.013513514	0.047120419
YBL032W_YDR011W	0	0	2	4	0	0	160187	465917	161332	470422	381	1501	5.97	7.57	41.683	168.765	0.062827225	0.068575233	0.081151832	0.074567244	0.065445026	0.085885486	0.007853403	0.030625832	0.034031414	0.061251664	0	0.011318242	0.078534031	0.061917443	0.018324607	0.033954727	0.091623037	0.056591212	0.089005236	0.089214381	0.041884817	0.033288948	0.057591623	0.058588549	0.102094241	0.065912117	0.005235602	0.017310253	0.015706806	0.053262317	0.020942408	0.018641811	0.047120419
YBL032W_YLL036C	0	0	2	12	0	1	160187	68255	161332	66744	381	503	5.97	4.87	41.683	56.569	0.062827225	0.041666667	0.081151832	0.061507937	0.065445026	0.099206349	0.007853403	0.01984127	0.034031414	0.029761905	0	0.011904762	0.078534031	0.075396825	0.018324607	0.035714286	0.091623037	0.06547619	0.089005236	0.087301587	0.041884817	0.043650794	0.057591623	0.055555556	0.102094241	0.063492063	0.005235602	0.017857143	0.015706806	0.043650794	0.020942408	0.009920635	0.047120419
YBL032W_YLR406C	0	0	2	12	0	1	160187	931754	161332	931064	381	113	5.97	10.8	41.683	12.967	0.062827225	0.052631579	0.081151832	0.087719298	0.065445026	0.096491228	0.007853403	0.01754386	0.034031414	0.026315789	0	0.00877193	0.078534031	0.114035088	0.018324607	0.01754386	0.091623037	0.096491228	0.089005236	0.035087719	0.041884817	0.035087719	0.057591623	0.114035088	0.102094241	0.035087719	0.005235602	0	0.015706806	0.026315789	0.020942408	0.026315789	0.047120419
YBL032W_YJR059W	0	0	2	10	0	0	160187	545779	161332	548235	381	818	5.97	9.52	41.683	91.4	0.062827225	0.051282051	0.081151832	0.046398046	0.065445026	0.072039072	0.007853403	0.023199023	0.034031414	0.039072039	0	0.004884005	0.078534031	0.089133089	0.018324607	0.023199023	0.091623037	0.051282051	0.089005236	0.114774115	0.041884817	0.064713065	0.057591623	0.045177045	0.102094241	0.045177045	0.005235602	0.00976801	0.015706806	0.026862027	0.020942408	0.036630037	0.047120419
YBL032W_YKL120W	0	0	2	11	0	0	160187	216988	161332	217962	381	324	5.97	10.37	41.683	35.153	0.062827225	0.098461538	0.081151832	0.08	0.065445026	0.086153846	0.007853403	0.027692308	0.034031414	0.043076923	0	0.006153846	0.078534031	0.073846154	0.018324607	0.052307692	0.091623037	0.036923077	0.089005236	0.067692308	0.041884817	0.033846154	0.057591623	0.08	0.102094241	0.092307692	0.005235602	0.009230769	0.015706806	0.033846154	0.020942408	0.015384615	0.047120419
YBL032W_YKL056C	0	0	2	11	0	1	160187	334559	161332	334056	381	167	5.97	4.25	41.683	18.741	0.062827225	0.071428571	0.081151832	0.077380952	0.065445026	0.041666667	0.007853403	0.041666667	0.034031414	0.053571429	0	0.011904762	0.078534031	0.089285714	0.018324607	0.023809524	0.091623037	0.089285714	0.089005236	0.041666667	0.041884817	0.029761905	0.057591623	0.095238095	0.102094241	0.06547619	0.005235602	0.005952381	0.015706806	0.041666667	0.020942408	0.011904762	0.047120419
YBL032W_YGL127C	0	0	2	7	0	1	160187	270781	161332	270398	381	127	5.97	4.26	41.683	14.741	0.062827225	0.0390625	0.081151832	0.0390625	0.065445026	0.125	0.007853403	0.03125	0.034031414	0.0390625	0	0.03125	0.078534031	0.0390625	0.018324607	0.078125	0.091623037	0.078125	0.089005236	0.0625	0.041884817	0.078125	0.057591623	0.0390625	0.102094241	0.0625	0.005235602	0.0234375	0.015706806	0.0546875	0.020942408	0	0.047120419
YBL032W_YGR055W	0	0	2	7	0	0	160187	599421	161332	601145	381	574	5.97	7.68	41.683	63.221	0.062827225	0.093913043	0.081151832	0.083478261	0.065445026	0.086956522	0.007853403	0.017391304	0.034031414	0.073043478	0	0.022608696	0.078534031	0.046956522	0.018324607	0.034782609	0.091623037	0.03826087	0.089005236	0.069565217	0.041884817	0.033043478	0.057591623	0.083478261	0.102094241	0.095652174	0.005235602	0.010434783	0.015706806	0.046956522	0.020942408	0.008695652	0.047120419
YBL032W_YDR016C	0	0	2	4	0	1	160187	478756	161332	478472	381	94	5.97	4.04	41.683	10.516	0.062827225	0.042105263	0.081151832	0.031578947	0.065445026	0.115789474	0.007853403	0.031578947	0.034031414	0.021052632	0	0.010526316	0.078534031	0.052631579	0.018324607	0.052631579	0.091623037	0.105263158	0.089005236	0.136842105	0.041884817	0.021052632	0.057591623	0.031578947	0.102094241	0.084210526	0.005235602	0	0.015706806	0.021052632	0.020942408	0	0.047120419
YBL032W_YKR087C	0	0	2	11	0	1	160187	603874	161332	602837	381	345	5.97	9.96	41.683	39.328	0.062827225	0.060693642	0.081151832	0.060693642	0.065445026	0.089595376	0.007853403	0.034682081	0.034031414	0.057803468	0	0.014450867	0.078534031	0.057803468	0.018324607	0.034682081	0.091623037	0.049132948	0.089005236	0.095375723	0.041884817	0.049132948	0.057591623	0.046242775	0.102094241	0.072254335	0.005235602	0.014450867	0.015706806	0.046242775	0.020942408	0.023121387	0.047120419
YBL032W_YMR225C	0	0	2	13	0	1	160187	721402	161332	720959	381	98	5.97	10.38	41.683	11.476	0.062827225	0.02020202	0.081151832	0.050505051	0.065445026	0.070707071	0.007853403	0.060606061	0.034031414	0.050505051	0	0	0.078534031	0.121212121	0.018324607	0.050505051	0.091623037	0.060606061	0.089005236	0.050505051	0.041884817	0.050505051	0.057591623	0.080808081	0.102094241	0.060606061	0.005235602	0	0.015706806	0.03030303	0.020942408	0.04040404	0.047120419
YBL032W_YGL023C	0	0	2	7	0	1	160187	452109	161332	450202	381	635	5.97	7.76	41.683	70.616	0.062827225	0.048742138	0.081151832	0.045597484	0.065445026	0.066037736	0.007853403	0.012578616	0.034031414	0.023584906	0	0.007861635	0.078534031	0.073899371	0.018324607	0.045597484	0.091623037	0.062893082	0.089005236	0.136792453	0.041884817	0.044025157	0.057591623	0.047169811	0.102094241	0.050314465	0.005235602	0.012578616	0.015706806	0.017295597	0.020942408	0.028301887	0.047120419
YBL032W_YDR447C	0	0	2	4	0	1	160187	1355546	161332	1354822	381	136	5.97	11.28	41.683	15.803	0.062827225	0.04379562	0.081151832	0.04379562	0.065445026	0.109489051	0.007853403	0.01459854	0.034031414	0.01459854	0	0	0.078534031	0.102189781	0.018324607	0.051094891	0.091623037	0.051094891	0.089005236	0.072992701	0.041884817	0.02919708	0.057591623	0.072992701	0.102094241	0.051094891	0.005235602	0.00729927	0.015706806	0.03649635	0.020942408	0.00729927	0.047120419
YBL032W_YDR161W	0	0	2	4	0	0	160187	779041	161332	780204	381	387	5.97	4.1	41.683	42.942	0.062827225	0.074742268	0.081151832	0.072164948	0.065445026	0.118556701	0.007853403	0.025773196	0.034031414	0.030927835	0	0.007731959	0.078534031	0.06443299	0.018324607	0.056701031	0.091623037	0.12371134	0.089005236	0.059278351	0.041884817	0.033505155	0.057591623	0.048969072	0.102094241	0.074742268	0.005235602	0.010309278	0.015706806	0.030927835	0.020942408	0.00257732	0.047120419
YBL032W_YHR201C	0	0	2	8	0	1	160187	501143	161332	499950	381	397	5.97	5.48	41.683	45.051	0.062827225	0.060301508	0.081151832	0.045226131	0.065445026	0.108040201	0.007853403	0.020100503	0.034031414	0.037688442	0	0.007537688	0.078534031	0.08040201	0.018324607	0.037688442	0.091623037	0.085427136	0.089005236	0.087939698	0.041884817	0.022613065	0.057591623	0.08040201	0.102094241	0.067839196	0.005235602	0.012562814	0.015706806	0.035175879	0.020942408	0.01758794	0.047120419
YBL032W_YML032C	0	0	2	13	0	1	160187	213930	161332	212515	381	471	5.97	8.56	41.683	52.403	0.062827225	0.052966102	0.081151832	0.074152542	0.065445026	0.055084746	0.007853403	0.021186441	0.034031414	0.038135593	0	0.004237288	0.078534031	0.084745763	0.018324607	0.044491525	0.091623037	0.061440678	0.089005236	0.072033898	0.041884817	0.063559322	0.057591623	0.059322034	0.102094241	0.046610169	0.005235602	0.004237288	0.015706806	0.021186441	0.020942408	0.014830508	0.047120419
YBL032W_YOR157C	0	0	2	15	0	1	160187	631752	161332	630967	381	261	5.97	6.6	41.683	28.268	0.062827225	0.080152672	0.081151832	0.099236641	0.065445026	0.080152672	0.007853403	0.015267176	0.034031414	0.022900763	0	0.011450382	0.078534031	0.057251908	0.018324607	0.045801527	0.091623037	0.053435115	0.089005236	0.080152672	0.041884817	0.026717557	0.057591623	0.072519084	0.102094241	0.06870229	0.005235602	0.015267176	0.015706806	0.034351145	0.020942408	0.034351145	0.047120419
YBL032W_YLR259C	0	0	2	12	0	1	160187	665004	161332	663286	381	572	5.97	5.06	41.683	60.751	0.062827225	0.097731239	0.081151832	0.097731239	0.065445026	0.085514834	0.007853403	0.019197208	0.034031414	0.02443281	0	0	0.078534031	0.076788831	0.018324607	0.022687609	0.091623037	0.089005236	0.089005236	0.066317627	0.041884817	0.040139616	0.057591623	0.085514834	0.102094241	0.073298429	0.005235602	0.008726003	0.015706806	0.012216405	0.020942408	0.003490401	0.047120419
YBL032W_YBR139W	0	0	2	2	0	0	160187	515658	161332	517184	381	508	5.97	5.02	41.683	57.638	0.062827225	0.072691552	0.081151832	0.053045187	0.065445026	0.098231827	0.007853403	0.023575639	0.034031414	0.05697446	0	0.017681729	0.078534031	0.047151277	0.018324607	0.031434185	0.091623037	0.053045187	0.089005236	0.080550098	0.041884817	0.05108055	0.057591623	0.043222004	0.102094241	0.053045187	0.005235602	0.021611002	0.015706806	0.05697446	0.020942408	0.023575639	0.047120419
YBL032W_YBR252W	0	0	2	2	0	0	160187	722606	161332	723049	381	147	5.97	7.53	41.683	15.307	0.062827225	0.114864865	0.081151832	0.108108108	0.065445026	0.047297297	0.007853403	0.02027027	0.034031414	0.027027027	0	0	0.078534031	0.054054054	0.018324607	0.047297297	0.091623037	0.027027027	0.089005236	0.081081081	0.041884817	0.027027027	0.057591623	0.108108108	0.102094241	0.074324324	0.005235602	0	0.015706806	0.027027027	0.020942408	0.006756757	0.047120419
YBL032W_YLL001W	0	0	2	12	0	0	160187	147889	161332	150162	381	757	5.97	5.25	41.683	84.971	0.062827225	0.05408971	0.081151832	0.042216359	0.065445026	0.12005277	0.007853403	0.014511873	0.034031414	0.029023747	0	0.001319261	0.078534031	0.075197889	0.018324607	0.036939314	0.091623037	0.071240106	0.089005236	0.077836412	0.041884817	0.044854881	0.057591623	0.058047493	0.102094241	0.079155673	0.005235602	0.013192612	0.015706806	0.029023747	0.020942408	0.011873351	0.047120419
YBL032W_YNL313C	0	0	2	14	0	1	160187	48021	161332	45307	381	904	5.97	5.43	41.683	102.335	0.062827225	0.040883978	0.081151832	0.087292818	0.065445026	0.128176796	0.007853403	0.016574586	0.034031414	0.029834254	0	0.022099448	0.078534031	0.071823204	0.018324607	0.043093923	0.091623037	0.082872928	0.089005236	0.081767956	0.041884817	0.04198895	0.057591623	0.043093923	0.102094241	0.062983425	0.005235602	0.019889503	0.015706806	0.04198895	0.020942408	0.012154696	0.047120419
YBL032W_YMR286W	0	0	2	13	0	0	160187	841941	161332	842201	381	86	5.97	11	41.683	9.531	0.062827225	0.068965517	0.081151832	0.034482759	0.065445026	0.091954023	0.007853403	0.011494253	0.034031414	0.022988506	0	0	0.078534031	0.126436782	0.018324607	0.022988506	0.091623037	0.068965517	0.089005236	0.091954023	0.041884817	0.045977011	0.057591623	0.126436782	0.102094241	0.068965517	0.005235602	0	0.015706806	0.022988506	0.020942408	0.022988506	0.047120419
YBL032W_YLR448W	0	0	2	12	0	0	160187	1028850	161332	1029764	381	176	5.97	10.89	41.683	19.986	0.062827225	0.039548023	0.081151832	0.079096045	0.065445026	0.11299435	0.007853403	0.005649718	0.034031414	0.039548023	0	0.005649718	0.078534031	0.146892655	0.018324607	0.039548023	0.091623037	0.073446328	0.089005236	0.039548023	0.041884817	0.056497175	0.057591623	0.107344633	0.102094241	0.02259887	0.005235602	0	0.015706806	0.028248588	0.020942408	0.011299435	0.047120419
YBL032W_YLR197W	0	0	2	12	0	0	160187	546099	161332	547613	381	504	5.97	9.63	41.683	56.864	0.062827225	0.04950495	0.081151832	0.087128713	0.065445026	0.104950495	0.007853403	0.013861386	0.034031414	0.035643564	0	0.003960396	0.078534031	0.140594059	0.018324607	0.037623762	0.091623037	0.091089109	0.089005236	0.073267327	0.041884817	0.025742574	0.057591623	0.045544554	0.102094241	0.057425743	0.005235602	0.007920792	0.015706806	0.02970297	0.020942408	0.015841584	0.047120419
YBL032W_YLR258W	0	0	2	12	0	0	160187	660718	161332	662835	381	705	5.97	6.32	41.683	80.078	0.062827225	0.065155807	0.081151832	0.073654391	0.065445026	0.099150142	0.007853403	0.019830028	0.034031414	0.050991501	0	0.011331445	0.078534031	0.052407932	0.018324607	0.028328612	0.091623037	0.062322946	0.089005236	0.049575071	0.041884817	0.043909348	0.057591623	0.073654391	0.102094241	0.04815864	0.005235602	0.009915014	0.015706806	0.041076487	0.020942408	0.033994334	0.047120419
YBL032W_YOR086C	0	0	2	15	0	1	160187	486781	161332	483221	381	1186	5.97	7.15	41.683	133.575	0.062827225	0.059814659	0.081151832	0.052232519	0.065445026	0.096040438	0.007853403	0.01600674	0.034031414	0.039595619	0	0.01432182	0.078534031	0.096882898	0.018324607	0.032013479	0.091623037	0.069924179	0.089005236	0.062342039	0.041884817	0.043807919	0.057591623	0.077506318	0.102094241	0.066554339	0.005235602	0.00589722	0.015706806	0.032013479	0.020942408	0.01095198	0.047120419
YBL032W_YBR221C	0	0	2	2	0	1	160187	666248	161332	665148	381	366	5.97	5.06	41.683	40.053	0.062827225	0.0626703	0.081151832	0.108991826	0.065445026	0.076294278	0.007853403	0.021798365	0.034031414	0.054495913	0	0.002724796	0.078534031	0.051771117	0.018324607	0.027247956	0.091623037	0.081743869	0.089005236	0.073569482	0.041884817	0.054495913	0.057591623	0.089918256	0.102094241	0.054495913	0.005235602	0.002724796	0.015706806	0.032697548	0.020942408	0.010899183	0.047120419
YBL032W_YHR045W	0	0	2	8	0	0	160187	195544	161332	197226	381	560	5.97	7.02	41.683	62.691	0.062827225	0.069518717	0.081151832	0.04456328	0.065445026	0.117647059	0.007853403	0.017825312	0.034031414	0.049910873	0	0.017825312	0.078534031	0.067736185	0.018324607	0.026737968	0.091623037	0.057040998	0.089005236	0.087344029	0.041884817	0.037433155	0.057591623	0.058823529	0.102094241	0.07486631	0.005235602	0.016042781	0.015706806	0.032085561	0.020942408	0.010695187	0.047120419
YBL032W_YFR049W	0	0	2	6	0	0	160187	248510	161332	248881	381	123	5.97	10.3	41.683	13.689	0.062827225	0.048387097	0.081151832	0.080645161	0.065445026	0.064516129	0.007853403	0.032258065	0.034031414	0.048387097	0	0.008064516	0.078534031	0.080645161	0.018324607	0.008064516	0.091623037	0.072580645	0.089005236	0.088709677	0.041884817	0.088709677	0.057591623	0.080645161	0.102094241	0.064516129	0.005235602	0.016129032	0.015706806	0.024193548	0.020942408	0.040322581	0.047120419
YBL032W_YGL186C	0	0	2	7	0	1	160187	152782	161332	151043	381	579	5.97	8.81	41.683	64.546	0.062827225	0.081034483	0.081151832	0.068965517	0.065445026	0.094827586	0.007853403	0.027586207	0.034031414	0.067241379	0	0.031034483	0.078534031	0.048275862	0.018324607	0.015517241	0.091623037	0.039655172	0.089005236	0.094827586	0.041884817	0.029310345	0.057591623	0.089655172	0.102094241	0.074137931	0.005235602	0.022413793	0.015706806	0.043103448	0.020942408	0.017241379	0.047120419
YBL032W_YJR058C	0	0	2	10	0	1	160187	545167	161332	544724	381	147	5.97	4.85	41.683	17.373	0.062827225	0.040540541	0.081151832	0.033783784	0.065445026	0.108108108	0.007853403	0.040540541	0.034031414	0.081081081	0	0.006756757	0.078534031	0.033783784	0.018324607	0.047297297	0.091623037	0.054054054	0.089005236	0.067567568	0.041884817	0.013513514	0.057591623	0.087837838	0.102094241	0.087837838	0.005235602	0.02027027	0.015706806	0.047297297	0.020942408	0.033783784	0.047120419
YBL032W_YDL212W	0	0	2	4	0	0	160187	78427	161332	79059	381	210	5.97	8.07	41.683	23.512	0.062827225	0.066350711	0.081151832	0.071090047	0.065445026	0.104265403	0.007853403	0.028436019	0.034031414	0.056872038	0	0.014218009	0.078534031	0.075829384	0.018324607	0.037914692	0.091623037	0.052132701	0.089005236	0.061611374	0.041884817	0.028436019	0.057591623	0.075829384	0.102094241	0.066350711	0.005235602	0.023696682	0.015706806	0.037914692	0.020942408	0.023696682	0.047120419
YBL032W_YKL186C	0	0	2	11	0	1	160187	93303	161332	92749	381	184	5.97	7.93	41.683	20.783	0.062827225	0.054054054	0.081151832	0.059459459	0.065445026	0.064864865	0.007853403	0.037837838	0.034031414	0.059459459	0	0.010810811	0.078534031	0.043243243	0.018324607	0.07027027	0.091623037	0.010810811	0.089005236	0.037837838	0.041884817	0.059459459	0.057591623	0.059459459	0.102094241	0.07027027	0.005235602	0.016216216	0.015706806	0.021621622	0.020942408	0.016216216	0.047120419
YBL032W_YLR085C	0	0	2	12	0	1	160187	301990	161332	300674	381	438	5.97	5.31	41.683	50.043	0.062827225	0.056947608	0.081151832	0.038724374	0.065445026	0.08428246	0.007853403	0.018223235	0.034031414	0.066059226	0	0.01594533	0.078534031	0.066059226	0.018324607	0.029612756	0.091623037	0.075170843	0.089005236	0.079726651	0.041884817	0.056947608	0.057591623	0.054669704	0.102094241	0.066059226	0.005235602	0.020501139	0.015706806	0.036446469	0.020942408	0.027334852	0.047120419
YBL032W_YGR027C	0	0	2	7	0	1	160187	534462	161332	534136	381	108	5.97	11.13	41.683	12.039	0.062827225	0.04587156	0.081151832	0.128440367	0.065445026	0.082568807	0.007853403	0.018348624	0.034031414	0	0	0.009174312	0.078534031	0.165137615	0.018324607	0.04587156	0.091623037	0.04587156	0.089005236	0.091743119	0.041884817	0.036697248	0.057591623	0.055045872	0.102094241	0.073394495	0.005235602	0	0.015706806	0.036697248	0.020942408	0.027522936	0.047120419
YBL032W_YKL112W	0	0	2	11	0	0	160187	226214	161332	228409	381	731	5.97	4.74	41.683	81.752	0.062827225	0.046448087	0.081151832	0.045081967	0.065445026	0.06284153	0.007853403	0.015027322	0.034031414	0.019125683	0	0.00273224	0.078534031	0.06557377	0.018324607	0.031420765	0.091623037	0.06147541	0.089005236	0.096994536	0.041884817	0.032786885	0.057591623	0.054644809	0.102094241	0.047814208	0.005235602	0.004098361	0.015706806	0.024590164	0.020942408	0.053278689	0.047120419
YBL032W_YIL138C	0	0	2	9	0	1	160187	89715	161332	89230	381	161	5.97	4.31	41.683	19.093	0.062827225	0.00617284	0.081151832	0.049382716	0.065445026	0.12962963	0.007853403	0.018518519	0.034031414	0.00617284	0	0.012345679	0.078534031	0.12962963	0.018324607	0.074074074	0.091623037	0.228395062	0.089005236	0.092592593	0.041884817	0	0.057591623	0.012345679	0.102094241	0.024691358	0.005235602	0.00617284	0.015706806	0.018518519	0.020942408	0	0.047120419
YBL032W_YPL047W	0	0	2	16	0	0	160187	465959	161332	466258	381	99	5.97	7.26	41.683	11.285	0.062827225	0.05	0.081151832	0.05	0.065445026	0.12	0.007853403	0.01	0.034031414	0.01	0	0	0.078534031	0.02	0.018324607	0.09	0.091623037	0.05	0.089005236	0.08	0.041884817	0.02	0.057591623	0.02	0.102094241	0.08	0.005235602	0.03	0.015706806	0.04	0.020942408	0.02	0.047120419
YBL032W_YBR291C	0	0	2	2	0	1	160187	784568	161332	783669	381	299	5.97	10.39	41.683	32.173	0.062827225	0.093333333	0.081151832	0.09	0.065445026	0.1	0.007853403	0.023333333	0.034031414	0.046666667	0	0.003333333	0.078534031	0.076666667	0.018324607	0.023333333	0.091623037	0.03	0.089005236	0.086666667	0.041884817	0.036666667	0.057591623	0.066666667	0.102094241	0.06	0.005235602	0.013333333	0.015706806	0.036666667	0.020942408	0.006666667	0.047120419
YBL032W_YGR105W	0	0	2	7	0	0	160187	698603	161332	698836	381	77	5.97	4.91	41.683	8.435	0.062827225	0.038461538	0.081151832	0.115384615	0.065445026	0.08974359	0.007853403	0.051282051	0.034031414	0.064102564	0	0	0.078534031	0.051282051	0.018324607	0.025641026	0.091623037	0.038461538	0.089005236	0.012820513	0.041884817	0.038461538	0.057591623	0.153846154	0.102094241	0.076923077	0.005235602	0	0.015706806	0.012820513	0.020942408	0.012820513	0.047120419
YBL032W_YJL101C	0	0	2	10	0	1	160187	236351	161332	234315	381	678	5.97	6.23	41.683	78.253	0.062827225	0.042709867	0.081151832	0.060382916	0.065445026	0.089837997	0.007853403	0.022091311	0.034031414	0.057437408	0	0.016200295	0.078534031	0.072164948	0.018324607	0.026509573	0.091623037	0.063328424	0.089005236	0.070692194	0.041884817	0.053019146	0.057591623	0.053019146	0.102094241	0.053019146	0.005235602	0.013254786	0.015706806	0.044182622	0.020942408	0.027982327	0.047120419
YBL032W_YKL146W	0	0	2	11	0	0	160187	171788	161332	173866	381	692	5.97	8.65	41.683	75.459	0.062827225	0.072150072	0.081151832	0.077922078	0.065445026	0.10966811	0.007853403	0.015873016	0.034031414	0.053391053	0	0.011544012	0.078534031	0.044733045	0.018324607	0.025974026	0.091623037	0.043290043	0.089005236	0.112554113	0.041884817	0.051948052	0.057591623	0.062049062	0.102094241	0.066378066	0.005235602	0.012987013	0.015706806	0.033189033	0.020942408	0.025974026	0.047120419
YBL032W_YFL048C	0	0	2	6	0	1	160187	40180	161332	38843	381	445	5.97	5.72	41.683	50.33	0.062827225	0.060538117	0.081151832	0.047085202	0.065445026	0.105381166	0.007853403	0.02690583	0.034031414	0.042600897	0	0.013452915	0.078534031	0.087443946	0.018324607	0.060538117	0.091623037	0.053811659	0.089005236	0.067264574	0.041884817	0.035874439	0.057591623	0.062780269	0.102094241	0.060538117	0.005235602	0.004484305	0.015706806	0.031390135	0.020942408	0.004484305	0.047120419
YBL032W_YML048W	0	0	2	13	0	0	160187	178426	161332	179637	381	403	5.97	7.14	41.683	45.869	0.062827225	0.056930693	0.081151832	0.079207921	0.065445026	0.103960396	0.007853403	0.01980198	0.034031414	0.044554455	0	0.017326733	0.078534031	0.084158416	0.018324607	0.024752475	0.091623037	0.074257426	0.089005236	0.056930693	0.041884817	0.044554455	0.057591623	0.042079208	0.102094241	0.079207921	0.005235602	0.004950495	0.015706806	0.044554455	0.020942408	0.014851485	0.047120419
YBL032W_YMR080C	0	0	2	13	0	1	160187	429626	161332	426711	381	971	5.97	6.45	41.683	109.429	0.062827225	0.054526749	0.081151832	0.060699588	0.065445026	0.101851852	0.007853403	0.014403292	0.034031414	0.040123457	0	0.013374486	0.078534031	0.061728395	0.018324607	0.051440329	0.091623037	0.067901235	0.089005236	0.082304527	0.041884817	0.04526749	0.057591623	0.066872428	0.102094241	0.055555556	0.005235602	0.019547325	0.015706806	0.028806584	0.020942408	0.022633745	0.047120419
YBL032W_YHR193C	0	0	2	8	0	1	160187	488236	161332	487712	381	174	5.97	4.67	41.683	18.709	0.062827225	0.062857143	0.081151832	0.137142857	0.065445026	0.057142857	0.007853403	0.022857143	0.034031414	0.022857143	0	0	0.078534031	0.091428571	0.018324607	0.068571429	0.091623037	0.085714286	0.089005236	0.051428571	0.041884817	0.028571429	0.057591623	0.08	0.102094241	0.068571429	0.005235602	0	0.015706806	0.011428571	0.020942408	0.005714286	0.047120419
YBL032W_YMR079W	0	0	2	13	0	0	160187	424988	161332	426058	381	304	5.97	5.26	41.683	34.9	0.062827225	0.059016393	0.081151832	0.062295082	0.065445026	0.095081967	0.007853403	0.026229508	0.034031414	0.055737705	0	0.009836066	0.078534031	0.078688525	0.018324607	0.036065574	0.091623037	0.091803279	0.089005236	0.072131148	0.041884817	0.062295082	0.057591623	0.049180328	0.102094241	0.045901639	0.005235602	0.013114754	0.015706806	0.059016393	0.020942408	0.013114754	0.047120419
YBL032W_YGL166W	0	0	2	7	0	0	160187	191135	161332	191812	381	225	5.97	7.69	41.683	24.425	0.062827225	0.075221239	0.081151832	0.061946903	0.065445026	0.075221239	0.007853403	0.022123894	0.034031414	0.008849558	0	0	0.078534031	0.057522124	0.018324607	0.026548673	0.091623037	0.057522124	0.089005236	0.101769912	0.041884817	0.053097345	0.057591623	0.039823009	0.102094241	0.048672566	0.005235602	0.053097345	0.015706806	0.013274336	0.020942408	0.03539823	0.047120419
YBL032W_YDL173W	0	0	2	4	0	0	160187	148192	161332	149079	381	295	5.97	10.3	41.683	31.886	0.062827225	0.091216216	0.081151832	0.064189189	0.065445026	0.040540541	0.007853403	0.016891892	0.034031414	0.037162162	0	0	0.078534031	0.101351351	0.018324607	0.023648649	0.091623037	0.047297297	0.089005236	0.097972973	0.041884817	0.043918919	0.057591623	0.043918919	0.102094241	0.064189189	0.005235602	0	0.015706806	0.010135135	0.020942408	0.02027027	0.047120419
YBL032W_YGR191W	0	0	2	7	0	0	160187	880425	161332	882236	381	603	5.97	7.36	41.683	66.006	0.062827225	0.074503311	0.081151832	0.084437086	0.065445026	0.109271523	0.007853403	0.023178808	0.034031414	0.062913907	0	0.021523179	0.078534031	0.043046358	0.018324607	0.014900662	0.091623037	0.044701987	0.089005236	0.09602649	0.041884817	0.03807947	0.057591623	0.072847682	0.102094241	0.071192053	0.005235602	0.014900662	0.015706806	0.024834437	0.020942408	0.013245033	0.047120419
YBL032W_YPL246C	0	0	2	16	0	1	160187	85297	161332	84509	381	262	5.97	7.52	41.683	29.499	0.062827225	0.072243346	0.081151832	0.064638783	0.065445026	0.159695817	0.007853403	0.011406844	0.034031414	0.064638783	0	0.02661597	0.078534031	0.038022814	0.018324607	0.007604563	0.091623037	0.041825095	0.089005236	0.068441065	0.041884817	0.068441065	0.057591623	0.049429658	0.102094241	0.072243346	0.005235602	0.011406844	0.015706806	0.057034221	0.020942408	0.022813688	0.047120419
YBL032W_YNL330C	0	0	2	14	0	1	160187	19302	161332	18001	381	433	5.97	5.28	41.683	48.904	0.062827225	0.089861751	0.081151832	0.062211982	0.065445026	0.064516129	0.007853403	0.036866359	0.034031414	0.043778802	0	0.004608295	0.078534031	0.052995392	0.018324607	0.013824885	0.091623037	0.064516129	0.089005236	0.048387097	0.041884817	0.046082949	0.057591623	0.080645161	0.102094241	0.039170507	0.005235602	0.023041475	0.015706806	0.073732719	0.020942408	0.032258065	0.047120419
YBL032W_YGR229C	0	0	2	7	0	1	160187	950902	161332	949385	381	505	5.97	4.42	41.683	57.079	0.062827225	0.049407115	0.081151832	0.057312253	0.065445026	0.059288538	0.007853403	0.019762846	0.034031414	0.037549407	0	0.015810277	0.078534031	0.071146245	0.018324607	0.057312253	0.091623037	0.104743083	0.089005236	0.083003953	0.041884817	0.045454545	0.057591623	0.063241107	0.102094241	0.041501976	0.005235602	0.001976285	0.015706806	0.02173913	0.020942408	0.0256917	0.047120419
YBL032W_YMR246W	0	0	2	13	0	0	160187	759806	161332	761890	381	694	5.97	6.52	41.683	77.267	0.062827225	0.082014388	0.081151832	0.067625899	0.065445026	0.083453237	0.007853403	0.020143885	0.034031414	0.037410072	0	0.015827338	0.078534031	0.083453237	0.018324607	0.020143885	0.091623037	0.076258993	0.089005236	0.043165468	0.041884817	0.046043165	0.057591623	0.071942446	0.102094241	0.084892086	0.005235602	0.017266187	0.015706806	0.035971223	0.020942408	0.020143885	0.047120419
YBL032W_YCR046C	0	0	2	3	0	1	160187	210419	161332	209910	381	169	5.97	11.19	41.683	19.394	0.062827225	0.041176471	0.081151832	0.052941176	0.065445026	0.105882353	0.007853403	0.017647059	0.034031414	0.011764706	0	0.011764706	0.078534031	0.088235294	0.018324607	0.041176471	0.091623037	0.029411765	0.089005236	0.094117647	0.041884817	0.047058824	0.057591623	0.088235294	0.102094241	0.076470588	0.005235602	0.005882353	0.015706806	0.041176471	0.020942408	0.011764706	0.047120419
YBL032W_YJR103W	0	0	2	10	0	0	160187	620743	161332	622437	381	564	5.97	6.02	41.683	63.056	0.062827225	0.083185841	0.081151832	0.044247788	0.065445026	0.100884956	0.007853403	0.024778761	0.034031414	0.028318584	0	0.012389381	0.078534031	0.056637168	0.018324607	0.030088496	0.091623037	0.077876106	0.089005236	0.063716814	0.041884817	0.046017699	0.057591623	0.083185841	0.102094241	0.069026549	0.005235602	0.014159292	0.015706806	0.030088496	0.020942408	0.03539823	0.047120419
YBL032W_YHR200W	0	0	2	8	0	0	160187	499079	161332	499885	381	268	5.97	4.56	41.683	29.747	0.062827225	0.066914498	0.081151832	0.074349442	0.065445026	0.089219331	0.007853403	0.026022305	0.034031414	0.044609665	0	0	0.078534031	0.033457249	0.018324607	0.089219331	0.091623037	0.092936803	0.089005236	0.07063197	0.041884817	0.044609665	0.057591623	0.05204461	0.102094241	0.063197026	0.005235602	0.003717472	0.015706806	0.007434944	0.020942408	0.022304833	0.047120419
YBL032W_YER117W	0	0	2	5	0	0	160187	396765	161332	397649	381	137	5.97	11.11	41.683	14.473	0.062827225	0.123188406	0.081151832	0.108695652	0.065445026	0.065217391	0.007853403	0.043478261	0.034031414	0.02173913	0	0.014492754	0.078534031	0.079710145	0.018324607	0.014492754	0.091623037	0.028985507	0.089005236	0.072463768	0.041884817	0.050724638	0.057591623	0.101449275	0.102094241	0.050724638	0.005235602	0.014492754	0.015706806	0.014492754	0.020942408	0	0.047120419
YBL032W_YNL078W	0	0	2	14	0	0	160187	479769	161332	480992	381	407	5.97	10.74	41.683	45.908	0.062827225	0.026960784	0.081151832	0.039215686	0.065445026	0.080882353	0.007853403	0.024509804	0.034031414	0.031862745	0	0.004901961	0.078534031	0.056372549	0.018324607	0.044117647	0.091623037	0.039215686	0.089005236	0.149509804	0.041884817	0.066176471	0.057591623	0.034313725	0.102094241	0.053921569	0.005235602	0.004901961	0.015706806	0.029411765	0.020942408	0.029411765	0.047120419
YBL032W_YCR069W	0	0	2	3	0	0	160187	239051	161332	240007	381	318	5.97	6.9	41.683	35.78	0.062827225	0.062695925	0.081151832	0.056426332	0.065445026	0.094043887	0.007853403	0.021943574	0.034031414	0.043887147	0	0.003134796	0.078534031	0.081504702	0.018324607	0.02507837	0.091623037	0.056426332	0.089005236	0.059561129	0.041884817	0.053291536	0.057591623	0.068965517	0.102094241	0.056426332	0.005235602	0.012539185	0.015706806	0.056426332	0.020942408	0.034482759	0.047120419
YBL032W_YDL046W	0	0	2	4	0	0	160187	371237	161332	371758	381	173	5.97	4.18	41.683	19.063	0.062827225	0.068965517	0.081151832	0.057471264	0.065445026	0.109195402	0.007853403	0.005747126	0.034031414	0.034482759	0	0	0.078534031	0.045977011	0.018324607	0.017241379	0.091623037	0.103448276	0.089005236	0.028735632	0.041884817	0.086206897	0.057591623	0.08045977	0.102094241	0.091954023	0.005235602	0.022988506	0.015706806	0.040229885	0.020942408	0.005747126	0.047120419
YBL032W_YPR051W	0	0	2	16	0	0	160187	664957	161332	665487	381	176	5.97	7.37	41.683	20.457	0.062827225	0.056497175	0.081151832	0.056497175	0.065445026	0.096045198	0.007853403	0.050847458	0.034031414	0.033898305	0	0.005649718	0.078534031	0.062146893	0.018324607	0.016949153	0.091623037	0.084745763	0.089005236	0.04519774	0.041884817	0.039548023	0.057591623	0.04519774	0.102094241	0.09039548	0.005235602	0.02259887	0.015706806	0.062146893	0.020942408	0.02259887	0.047120419
YBL032W_YLR069C	0	0	2	12	0	1	160187	273916	161332	271631	381	761	5.97	6.83	41.683	84.573	0.062827225	0.070866142	0.081151832	0.065616798	0.065445026	0.066929134	0.007853403	0.031496063	0.034031414	0.043307087	0	0.002624672	0.078534031	0.069553806	0.018324607	0.038057743	0.091623037	0.072178478	0.089005236	0.072178478	0.041884817	0.043307087	0.057591623	0.085301837	0.102094241	0.065616798	0.005235602	0.01312336	0.015706806	0.027559055	0.020942408	0.017060367	0.047120419
YBL032W_YBR061C	0	0	2	2	0	1	160187	365717	161332	364785	381	310	5.97	7.84	41.683	34.7	0.062827225	0.051446945	0.081151832	0.061093248	0.065445026	0.112540193	0.007853403	0.01607717	0.034031414	0.048231511	0	0.009646302	0.078534031	0.080385852	0.018324607	0.045016077	0.091623037	0.038585209	0.089005236	0.102893891	0.041884817	0.054662379	0.057591623	0.054662379	0.102094241	0.038585209	0.005235602	0.025723473	0.015706806	0.028938907	0.020942408	0.019292605	0.047120419
YBL032W_YNL200C	0	0	2	14	0	1	160187	264454	161332	263714	381	246	5.97	8.34	41.683	27.521	0.062827225	0.08097166	0.081151832	0.04048583	0.065445026	0.085020243	0.007853403	0.016194332	0.034031414	0.072874494	0	0.008097166	0.078534031	0.076923077	0.018324607	0.048582996	0.091623037	0.064777328	0.089005236	0.056680162	0.041884817	0.076923077	0.057591623	0.093117409	0.102094241	0.056680162	0.005235602	0.020242915	0.015706806	0.024291498	0.020942408	0.020242915	0.047120419
YBL032W_YOR232W	0	0	2	15	0	0	160187	774574	161332	775260	381	228	5.97	8.9	41.683	26.066	0.062827225	0.03930131	0.081151832	0.069868996	0.065445026	0.082969432	0.007853403	0.021834061	0.034031414	0.065502183	0	0	0.078534031	0.104803493	0.018324607	0.043668122	0.091623037	0.100436681	0.089005236	0.065502183	0.041884817	0.048034934	0.057591623	0.056768559	0.102094241	0.030567686	0.005235602	0	0.015706806	0.008733624	0.020942408	0.017467249	0.047120419
YBL032W_YNL030W	0	0	2	14	0	0	160187	576728	161332	577039	381	103	5.97	11.95	41.683	11.368	0.062827225	0.153846154	0.081151832	0.057692308	0.065445026	0.086538462	0.007853403	0.009615385	0.034031414	0.019230769	0	0	0.078534031	0.105769231	0.018324607	0.019230769	0.091623037	0.038461538	0.089005236	0.057692308	0.041884817	0.009615385	0.057591623	0.076923077	0.102094241	0.067307692	0.005235602	0	0.015706806	0.038461538	0.020942408	0.019230769	0.047120419
YBL032W_YNL111C	0	0	2	14	0	1	160187	417304	161332	416942	381	120	5.97	4.18	41.683	13.297	0.062827225	0.090909091	0.081151832	0.041322314	0.065445026	0.090909091	0.007853403	0.024793388	0.034031414	0.024793388	0	0.008264463	0.078534031	0.05785124	0.018324607	0.033057851	0.091623037	0.090909091	0.089005236	0.082644628	0.041884817	0.024793388	0.057591623	0.099173554	0.102094241	0.074380165	0.005235602	0	0.015706806	0.049586777	0.020942408	0.024793388	0.047120419
YBL032W_YGR102C	0	0	2	7	0	1	160187	695139	161332	694588	381	183	5.97	10.36	41.683	20.787	0.062827225	0.081521739	0.081151832	0.059782609	0.065445026	0.114130435	0.007853403	0.016304348	0.034031414	0.02173913	0	0.016304348	0.078534031	0.114130435	0.018324607	0.038043478	0.091623037	0.086956522	0.089005236	0.059782609	0.041884817	0.027173913	0.057591623	0.054347826	0.102094241	0.043478261	0.005235602	0.010869565	0.015706806	0.032608696	0.020942408	0.038043478	0.047120419
YBL032W_YKR085C	0	0	2	11	0	1	160187	599323	161332	598736	381	195	5.97	11	41.683	22.392	0.062827225	0.06122449	0.081151832	0.06122449	0.065445026	0.056122449	0.007853403	0.030612245	0.034031414	0.030612245	0	0.015306122	0.078534031	0.096938776	0.018324607	0.06122449	0.091623037	0.045918367	0.089005236	0.091836735	0.041884817	0.056122449	0.057591623	0.051020408	0.102094241	0.051020408	0.005235602	0.015306122	0.015706806	0.045918367	0.020942408	0.020408163	0.047120419
YBL032W_YJR067C	0	0	2	10	0	1	160187	567436	161332	567011	381	141	5.97	4.94	41.683	16.076	0.062827225	0.070422535	0.081151832	0.035211268	0.065445026	0.091549296	0.007853403	0.014084507	0.034031414	0.035211268	0	0.021126761	0.078534031	0.091549296	0.018324607	0.035211268	0.091623037	0.077464789	0.089005236	0.077464789	0.041884817	0.035211268	0.057591623	0.049295775	0.102094241	0.070422535	0.005235602	0.007042254	0.015706806	0.028169014	0.020942408	0.021126761	0.047120419
YBL032W_YKL069W	0	0	2	11	0	0	160187	306929	161332	307471	381	180	5.97	4.78	41.683	19.734	0.062827225	0.082872928	0.081151832	0.060773481	0.065445026	0.08839779	0.007853403	0.011049724	0.034031414	0.038674033	0	0.016574586	0.078534031	0.071823204	0.018324607	0.038674033	0.091623037	0.066298343	0.089005236	0.082872928	0.041884817	0.022099448	0.057591623	0.077348066	0.102094241	0.071823204	0.005235602	0.033149171	0.015706806	0.033149171	0.020942408	0.033149171	0.047120419
YBL032W_YDR119W	0	0	2	4	0	0	160187	688225	161332	690531	381	768	5.97	8.23	41.683	85.682	0.062827225	0.052015605	0.081151832	0.049414824	0.065445026	0.120936281	0.007853403	0.027308192	0.034031414	0.062418726	0	0.011703511	0.078534031	0.055916775	0.018324607	0.036410923	0.091623037	0.040312094	0.089005236	0.122236671	0.041884817	0.042912874	0.057591623	0.062418726	0.102094241	0.078023407	0.005235602	0.022106632	0.015706806	0.028608583	0.020942408	0.019505852	0.047120419
YBL032W_YCL034W	0	0	2	3	0	0	160187	61658	161332	62722	381	354	5.97	5.25	41.683	39.872	0.062827225	0.056338028	0.081151832	0.073239437	0.065445026	0.095774648	0.007853403	0.014084507	0.034031414	0.025352113	0	0.002816901	0.078534031	0.047887324	0.018324607	0.050704225	0.091623037	0.061971831	0.089005236	0.118309859	0.041884817	0.022535211	0.057591623	0.028169014	0.102094241	0.067605634	0.005235602	0.002816901	0.015706806	0.053521127	0.020942408	0.016901408	0.047120419
YBL032W_YDL095W	0	0	2	4	0	0	160187	287059	161332	289512	381	817	5.97	6.68	41.683	92.675	0.062827225	0.062347188	0.081151832	0.068459658	0.065445026	0.102689487	0.007853403	0.026894866	0.034031414	0.063569682	0	0.024449878	0.078534031	0.053789731	0.018324607	0.030562347	0.091623037	0.055012225	0.089005236	0.083129584	0.041884817	0.04400978	0.057591623	0.074572127	0.102094241	0.052567237	0.005235602	0.011002445	0.015706806	0.048899756	0.020942408	0.030562347	0.047120419
YBL032W_YGL101W	0	0	2	7	0	0	160187	312196	161332	312843	381	215	5.97	5.5	41.683	25.297	0.062827225	0.032407407	0.081151832	0.041666667	0.065445026	0.092592593	0.007853403	0.027777778	0.034031414	0.032407407	0	0.018518519	0.078534031	0.087962963	0.018324607	0.041666667	0.091623037	0.087962963	0.089005236	0.046296296	0.041884817	0.037037037	0.057591623	0.041666667	0.102094241	0.083333333	0.005235602	0.027777778	0.015706806	0.037037037	0.020942408	0.023148148	0.047120419
YBL032W_YDR486C	0	0	2	4	0	1	160187	1428113	161332	1427424	381	229	5.97	4.25	41.683	25.861	0.062827225	0.030434783	0.081151832	0.073913043	0.065445026	0.130434783	0.007853403	0.043478261	0.034031414	0.017391304	0	0.004347826	0.078534031	0.065217391	0.018324607	0.12173913	0.091623037	0.065217391	0.089005236	0.07826087	0.041884817	0.026086957	0.057591623	0.004347826	0.102094241	0.052173913	0.005235602	0	0.015706806	0.013043478	0.020942408	0.004347826	0.047120419
YBL032W_YKR081C	0	0	2	11	0	1	160187	592182	161332	591148	381	344	5.97	9.75	41.683	39.598	0.062827225	0.060869565	0.081151832	0.04057971	0.065445026	0.086956522	0.007853403	0.046376812	0.034031414	0.060869565	0	0	0.078534031	0.124637681	0.018324607	0.043478261	0.091623037	0.069565217	0.089005236	0.055072464	0.041884817	0.043478261	0.057591623	0.052173913	0.102094241	0.049275362	0.005235602	0.005797101	0.015706806	0.023188406	0.020942408	0.020289855	0.047120419
YBL032W_YBR086C	0	0	2	2	0	1	160187	423035	161332	420195	381	946	5.97	9.73	41.683	105.853	0.062827225	0.032734952	0.081151832	0.066525871	0.065445026	0.090813094	0.007853403	0.010559662	0.034031414	0.058078141	0	0.011615628	0.078534031	0.085533263	0.018324607	0.034846885	0.091623037	0.045406547	0.089005236	0.114044351	0.041884817	0.050686378	0.057591623	0.060190074	0.102094241	0.071805702	0.005235602	0.00844773	0.015706806	0.034846885	0.020942408	0.028511088	0.047120419
YBL032W_YLR018C	0	0	2	12	0	1	160187	179605	161332	178706	381	299	5.97	10.62	41.683	34.232	0.062827225	0.04	0.081151832	0.036666667	0.065445026	0.12	0.007853403	0.033333333	0.034031414	0.046666667	0	0.013333333	0.078534031	0.076666667	0.018324607	0.063333333	0.091623037	0.03	0.089005236	0.093333333	0.041884817	0.05	0.057591623	0.046666667	0.102094241	0.046666667	0.005235602	0.003333333	0.015706806	0.026666667	0.020942408	0.04	0.047120419
YBL032W_YFR006W	0	0	2	6	0	0	160187	156139	161332	157746	381	535	5.97	6.1	41.683	61.753	0.062827225	0.061567164	0.081151832	0.048507463	0.065445026	0.087686567	0.007853403	0.026119403	0.034031414	0.055970149	0	0.007462687	0.078534031	0.076492537	0.018324607	0.024253731	0.091623037	0.082089552	0.089005236	0.054104478	0.041884817	0.044776119	0.057591623	0.054104478	0.102094241	0.072761194	0.005235602	0.018656716	0.015706806	0.044776119	0.020942408	0.031716418	0.047120419
YBL032W_YEL063C	0	0	2	5	0	1	160187	33466	161332	31694	381	590	5.97	8.58	41.683	65.785	0.062827225	0.082910321	0.081151832	0.084602369	0.065445026	0.077834179	0.007853403	0.021996616	0.034031414	0.084602369	0	0.027072758	0.078534031	0.049069374	0.018324607	0.020304569	0.091623037	0.047377327	0.089005236	0.069373942	0.041884817	0.042301184	0.057591623	0.069373942	0.102094241	0.096446701	0.005235602	0.008460237	0.015706806	0.035532995	0.020942408	0.013536379	0.047120419
YBL032W_YPR017C	0	0	2	16	0	1	160187	593914	161332	593483	381	143	5.97	5.04	41.683	16.126	0.062827225	0.048611111	0.081151832	0.027777778	0.065445026	0.090277778	0.007853403	0.020833333	0.034031414	0.041666667	0	0.013888889	0.078534031	0.069444444	0.018324607	0.027777778	0.091623037	0.0625	0.089005236	0.104166667	0.041884817	0.034722222	0.057591623	0.069444444	0.102094241	0.083333333	0.005235602	0.041666667	0.015706806	0.013888889	0.020942408	0.020833333	0.047120419
YBL032W_YIL154C	0	0	2	9	0	1	160187	55021	161332	53981	381	346	5.97	4.78	41.683	39.07	0.062827225	0.057636888	0.081151832	0.043227666	0.065445026	0.095100865	0.007853403	0.028818444	0.034031414	0.023054755	0	0.008645533	0.078534031	0.057636888	0.018324607	0.031700288	0.091623037	0.095100865	0.089005236	0.100864553	0.041884817	0.031700288	0.057591623	0.077809798	0.102094241	0.043227666	0.005235602	0.014409222	0.015706806	0.023054755	0.020942408	0.028818444	0.047120419
YBL032W_YKR070W	0	0	2	11	0	0	160187	573216	161332	574274	381	352	5.97	9.35	41.683	39.406	0.062827225	0.073654391	0.081151832	0.059490085	0.065445026	0.099150142	0.007853403	0.011331445	0.034031414	0.050991501	0	0.011331445	0.078534031	0.076487252	0.018324607	0.036827195	0.091623037	0.036827195	0.089005236	0.067988669	0.041884817	0.050991501	0.057591623	0.065155807	0.102094241	0.067988669	0.005235602	0.005665722	0.015706806	0.039660057	0.020942408	0.016997167	0.047120419
YBL032W_YLR083C	0	0	2	12	0	1	160187	296095	161332	294092	381	667	5.97	6.86	41.683	75.962	0.062827225	0.067365269	0.081151832	0.04491018	0.065445026	0.113772455	0.007853403	0.020958084	0.034031414	0.088323353	0	0.019461078	0.078534031	0.046407186	0.018324607	0.025449102	0.091623037	0.040419162	0.089005236	0.085329341	0.041884817	0.040419162	0.057591623	0.068862275	0.102094241	0.071856287	0.005235602	0.01497006	0.015706806	0.05239521	0.020942408	0.020958084	0.047120419
YBL032W_YGL161C	0	0	2	7	0	1	160187	200148	161332	199216	381	310	5.97	4.64	41.683	34.843	0.062827225	0.064308682	0.081151832	0.048231511	0.065445026	0.08681672	0.007853403	0.022508039	0.034031414	0.064308682	0	0.01607717	0.078534031	0.035369775	0.018324607	0.041800643	0.091623037	0.038585209	0.089005236	0.093247588	0.041884817	0.038585209	0.057591623	0.064308682	0.102094241	0.077170418	0.005235602	0.006430868	0.015706806	0.035369775	0.020942408	0.012861736	0.047120419
YBL032W_YNL087W	0	0	2	14	0	0	160187	462413	161332	465949	381	1178	5.97	9.04	41.683	132.508	0.062827225	0.061068702	0.081151832	0.038167939	0.065445026	0.096692112	0.007853403	0.015267176	0.034031414	0.044105174	0	0.013570823	0.078534031	0.096692112	0.018324607	0.026293469	0.091623037	0.063613232	0.089005236	0.069550466	0.041884817	0.04495335	0.057591623	0.085665818	0.102094241	0.066157761	0.005235602	0.006785411	0.015706806	0.03307888	0.020942408	0.010178117	0.047120419
YBL032W_YLR244C	0	0	2	12	0	1	160187	626333	161332	625170	381	387	5.97	7.82	41.683	43.373	0.062827225	0.067010309	0.081151832	0.054123711	0.065445026	0.06185567	0.007853403	0.020618557	0.034031414	0.023195876	0	0.010309278	0.078534031	0.085051546	0.018324607	0.028350515	0.091623037	0.06443299	0.089005236	0.056701031	0.041884817	0.06443299	0.057591623	0.059278351	0.102094241	0.056701031	0.005235602	0.036082474	0.015706806	0.046391753	0.020942408	0.036082474	0.047120419
YBL032W_YDR395W	0	0	2	4	0	0	160187	1263317	161332	1266151	381	944	5.97	4.44	41.683	108.403	0.062827225	0.026455026	0.081151832	0.055026455	0.065445026	0.125925926	0.007853403	0.024338624	0.034031414	0.062433862	0	0.00952381	0.078534031	0.055026455	0.018324607	0.044444444	0.091623037	0.086772487	0.089005236	0.075132275	0.041884817	0.04021164	0.057591623	0.057142857	0.102094241	0.092063492	0.005235602	0.011640212	0.015706806	0.031746032	0.020942408	0.014814815	0.047120419
YBL032W_YBR143C	0	0	2	2	0	1	160187	532176	161332	530863	381	437	5.97	4.77	41.683	49.005	0.062827225	0.070776256	0.081151832	0.066210046	0.065445026	0.093607306	0.007853403	0.01369863	0.034031414	0.052511416	0	0.00456621	0.078534031	0.093607306	0.018324607	0.034246575	0.091623037	0.089041096	0.089005236	0.057077626	0.041884817	0.02283105	0.057591623	0.073059361	0.102094241	0.061643836	0.005235602	0.00913242	0.015706806	0.038812785	0.020942408	0.00913242	0.047120419
YBL032W_YAL023C	0	0	2	1	0	1	160187	108552	161332	106273	381	759	5.97	7.68	41.683	86.869	0.062827225	0.065789474	0.081151832	0.059210526	0.065445026	0.103947368	0.007853403	0.031578947	0.034031414	0.067105263	0	0.035526316	0.078534031	0.044736842	0.018324607	0.028947368	0.091623037	0.039473684	0.089005236	0.088157895	0.041884817	0.046052632	0.057591623	0.061842105	0.102094241	0.051315789	0.005235602	0.014473684	0.015706806	0.044736842	0.020942408	0.027631579	0.047120419
YBL032W_YKL138C	0	0	2	11	0	1	160187	185686	161332	185291	381	131	5.97	11.46	41.683	15.52	0.062827225	0.053030303	0.081151832	0.03030303	0.065445026	0.083333333	0.007853403	0.03030303	0.034031414	0.045454545	0	0.03030303	0.078534031	0.166666667	0.018324607	0.060606061	0.091623037	0.03030303	0.089005236	0.068181818	0.041884817	0.060606061	0.057591623	0.053030303	0.102094241	0.037878788	0.005235602	0.007575758	0.015706806	0.03030303	0.020942408	0.022727273	0.047120419
YBL032W_YGR108W	0	0	2	7	0	0	160187	703640	161332	705055	381	471	5.97	5.77	41.683	54.87	0.062827225	0.036016949	0.081151832	0.036016949	0.065445026	0.101694915	0.007853403	0.027542373	0.034031414	0.046610169	0	0.01059322	0.078534031	0.084745763	0.018324607	0.040254237	0.091623037	0.084745763	0.089005236	0.082627119	0.041884817	0.023305085	0.057591623	0.042372881	0.102094241	0.082627119	0.005235602	0.016949153	0.015706806	0.038135593	0.020942408	0.021186441	0.047120419
YBL032W_YPL144W	0	0	2	16	0	0	160187	280479	161332	280925	381	148	5.97	7.93	41.683	16.573	0.062827225	0.040268456	0.081151832	0.046979866	0.065445026	0.127516779	0.007853403	0.033557047	0.034031414	0.020134228	0	0.006711409	0.078534031	0.060402685	0.018324607	0.013422819	0.091623037	0.046979866	0.089005236	0.120805369	0.041884817	0.053691275	0.057591623	0.053691275	0.102094241	0.080536913	0.005235602	0.020134228	0.015706806	0.033557047	0.020942408	0.020134228	0.047120419
YBL032W_YML125C	0	0	2	13	0	1	160187	21700	161332	20762	381	312	5.97	5.31	41.683	35.287	0.062827225	0.07028754	0.081151832	0.047923323	0.065445026	0.10543131	0.007853403	0.019169329	0.034031414	0.028753994	0	0.012779553	0.078534031	0.060702875	0.018324607	0.022364217	0.091623037	0.063897764	0.089005236	0.07028754	0.041884817	0.047923323	0.057591623	0.079872204	0.102094241	0.073482428	0.005235602	0.003194888	0.015706806	0.063897764	0.020942408	0.022364217	0.047120419
YBL032W_YOR206W	0	0	2	15	0	0	160187	727513	161332	729645	381	710	5.97	8.94	41.683	81.601	0.062827225	0.033755274	0.081151832	0.054852321	0.065445026	0.101265823	0.007853403	0.022503516	0.034031414	0.045007032	0	0.007032349	0.078534031	0.108298172	0.018324607	0.045007032	0.091623037	0.098452883	0.089005236	0.084388186	0.041884817	0.032348805	0.057591623	0.052039381	0.102094241	0.0604782	0.005235602	0.007032349	0.015706806	0.029535865	0.020942408	0.012658228	0.047120419
YBL032W_YDR337W	0	0	2	4	0	0	160187	1146314	161332	1147174	381	286	5.97	10.72	41.683	33.057	0.062827225	0.034843206	0.081151832	0.090592334	0.065445026	0.083623693	0.007853403	0.031358885	0.034031414	0.041811847	0	0.003484321	0.078534031	0.101045296	0.018324607	0.041811847	0.091623037	0.080139373	0.089005236	0.055749129	0.041884817	0.024390244	0.057591623	0.052264808	0.102094241	0.073170732	0.005235602	0.006968641	0.015706806	0.020905923	0.020942408	0.006968641	0.047120419
YBL032W_YPL178W	0	0	2	16	0	0	160187	212157	161332	212783	381	208	5.97	4.86	41.683	23.774	0.062827225	0.076555024	0.081151832	0.033492823	0.065445026	0.071770335	0.007853403	0.019138756	0.034031414	0.076555024	0	0	0.078534031	0.052631579	0.018324607	0.028708134	0.091623037	0.076555024	0.089005236	0.090909091	0.041884817	0.057416268	0.057591623	0.028708134	0.102094241	0.052631579	0.005235602	0.019138756	0.015706806	0.043062201	0.020942408	0.009569378	0.047120419
YBL032W_YMR292W	0	0	2	13	0	0	160187	854794	161332	855292	381	138	5.97	11.34	41.683	15.431	0.062827225	0.115107914	0.081151832	0.057553957	0.065445026	0.151079137	0.007853403	0.014388489	0.034031414	0.165467626	0	0.014388489	0.078534031	0.035971223	0.018324607	0.021582734	0.091623037	0.014388489	0.089005236	0.035971223	0.041884817	0.043165468	0.057591623	0.064748201	0.102094241	0.122302158	0.005235602	0	0.015706806	0.007194245	0.020942408	0.007194245	0.047120419
YBL032W_YBR265W	0	0	2	2	0	0	160187	738577	161332	739539	381	320	5.97	6.26	41.683	35.986	0.062827225	0.065420561	0.081151832	0.07788162	0.065445026	0.112149533	0.007853403	0.018691589	0.034031414	0.049844237	0	0.012461059	0.078534031	0.062305296	0.018324607	0.040498442	0.091623037	0.07165109	0.089005236	0.052959502	0.041884817	0.037383178	0.057591623	0.056074766	0.102094241	0.068535826	0.005235602	0.031152648	0.015706806	0.037383178	0.020942408	0.018691589	0.047120419
YBL032W_YJR017C	0	0	2	10	0	1	160187	467025	161332	466513	381	170	5.97	9.19	41.683	19.405	0.062827225	0.064327485	0.081151832	0.040935673	0.065445026	0.064327485	0.007853403	0.011695906	0.034031414	0.035087719	0	0.01754386	0.078534031	0.087719298	0.018324607	0.029239766	0.091623037	0.076023392	0.089005236	0.105263158	0.041884817	0.046783626	0.057591623	0.058479532	0.102094241	0.040935673	0.005235602	0.011695906	0.015706806	0.01754386	0.020942408	0.046783626	0.047120419
YBL032W_YDR232W	0	0	2	4	0	0	160187	927449	161332	929095	381	548	5.97	7.52	41.683	59.362	0.062827225	0.072859745	0.081151832	0.114754098	0.065445026	0.089253188	0.007853403	0.016393443	0.034031414	0.036429872	0	0.007285974	0.078534031	0.06010929	0.018324607	0.032786885	0.091623037	0.045537341	0.089005236	0.076502732	0.041884817	0.038251366	0.057591623	0.063752277	0.102094241	0.058287796	0.005235602	0.010928962	0.015706806	0.027322404	0.020942408	0.04007286	0.047120419
YBL032W_YHL020C	0	0	2	8	0	1	160187	67453	161332	66239	381	404	5.97	4.87	41.683	46.065	0.062827225	0.032098765	0.081151832	0.04691358	0.065445026	0.088888889	0.007853403	0.017283951	0.034031414	0.022222222	0	0.004938272	0.078534031	0.086419753	0.018324607	0.116049383	0.091623037	0.086419753	0.089005236	0.098765432	0.041884817	0.027160494	0.057591623	0.074074074	0.102094241	0.02962963	0.005235602	0.009876543	0.015706806	0.019753086	0.020942408	0.019753086	0.047120419
YBL032W_YER056C	0	0	2	5	0	1	160187	268112	161332	266511	381	533	5.97	4.96	41.683	58.201	0.062827225	0.095505618	0.081151832	0.108614232	0.065445026	0.086142322	0.007853403	0.029962547	0.034031414	0.073033708	0	0.028089888	0.078534031	0.033707865	0.018324607	0.018726592	0.091623037	0.04494382	0.089005236	0.076779026	0.041884817	0.028089888	0.057591623	0.073033708	0.102094241	0.084269663	0.005235602	0.013108614	0.015706806	0.046816479	0.020942408	0.009363296	0.047120419
YBL032W_YGR281W	0	0	2	7	0	0	160187	1052831	161332	1057264	381	1477	5.97	7.65	41.683	166.727	0.062827225	0.059539919	0.081151832	0.066982409	0.065445026	0.103518268	0.007853403	0.034506089	0.034031414	0.057510149	0	0.01082544	0.078534031	0.072395129	0.018324607	0.028416779	0.091623037	0.064276049	0.089005236	0.066982409	0.041884817	0.035859269	0.057591623	0.058186739	0.102094241	0.079161028	0.005235602	0.01150203	0.015706806	0.027063599	0.020942408	0.01285521	0.047120419
YBL032W_YNL015W	0	0	2	14	0	0	160187	605385	161332	605612	381	75	5.97	6.8	41.683	8.59	0.062827225	0.039473684	0.081151832	0.026315789	0.065445026	0.065789474	0.007853403	0.013157895	0.034031414	0.039473684	0	0	0.078534031	0.144736842	0.018324607	0	0.091623037	0.092105263	0.089005236	0.026315789	0.041884817	0.026315789	0.057591623	0.118421053	0.102094241	0.078947368	0.005235602	0	0.015706806	0.013157895	0.020942408	0.078947368	0.047120419
YBL032W_YGL097W	0	0	2	7	0	0	160187	321785	161332	323233	381	482	5.97	6.02	41.683	53.013	0.062827225	0.091097308	0.081151832	0.078674948	0.065445026	0.082815735	0.007853403	0.022774327	0.034031414	0.039337474	0	0.016563147	0.078534031	0.072463768	0.018324607	0.033126294	0.091623037	0.060041408	0.089005236	0.062111801	0.041884817	0.047619048	0.057591623	0.068322981	0.102094241	0.041407867	0.005235602	0.01863354	0.015706806	0.022774327	0.020942408	0.031055901	0.047120419
YBL032W_YNL067W	0	0	2	14	0	0	160187	499682	161332	500257	381	191	5.97	10.47	41.683	21.657	0.062827225	0.0625	0.081151832	0.036458333	0.065445026	0.046875	0.007853403	0.020833333	0.034031414	0.036458333	0	0	0.078534031	0.104166667	0.018324607	0.036458333	0.091623037	0.046875	0.089005236	0.041666667	0.041884817	0.020833333	0.057591623	0.140625	0.102094241	0.09375	0.005235602	0.005208333	0.015706806	0.03125	0.020942408	0.026041667	0.047120419
YBL032W_YLR212C	0	0	2	12	0	1	160187	566283	161332	564862	381	473	5.97	4.4	41.683	52.627	0.062827225	0.056962025	0.081151832	0.054852321	0.065445026	0.082278481	0.007853403	0.03164557	0.034031414	0.050632911	0	0.008438819	0.078534031	0.03164557	0.018324607	0.037974684	0.091623037	0.052742616	0.089005236	0.111814346	0.041884817	0.042194093	0.057591623	0.067510549	0.102094241	0.056962025	0.005235602	0.006329114	0.015706806	0.03164557	0.020942408	0.021097046	0.047120419
YBL032W_YLR347C	0	0	2	12	0	1	160187	826412	161332	823827	381	861	5.97	4.34	41.683	94.775	0.062827225	0.038283063	0.081151832	0.118329466	0.065445026	0.104408353	0.007853403	0.02900232	0.034031414	0.038283063	0	0.010440835	0.078534031	0.040603248	0.018324607	0.063805104	0.091623037	0.06612529	0.089005236	0.076566125	0.041884817	0.039443155	0.057591623	0.062645012	0.102094241	0.068445476	0.005235602	0.012761021	0.015706806	0.027842227	0.020942408	0.006960557	0.047120419
YBL032W_YCL011C	0	0	2	3	0	1	160187	103358	161332	102075	381	427	5.97	6.16	41.683	48.728	0.062827225	0.102803738	0.081151832	0.044392523	0.065445026	0.053738318	0.007853403	0.021028037	0.034031414	0.058411215	0	0.004672897	0.078534031	0.039719626	0.018324607	0.028037383	0.091623037	0.077102804	0.089005236	0.063084112	0.041884817	0.037383178	0.057591623	0.051401869	0.102094241	0.039719626	0.005235602	0.014018692	0.015706806	0.03271028	0.020942408	0.011682243	0.047120419
YBL032W_YDR496C	0	0	2	4	0	1	160187	1443396	161332	1441426	381	656	5.97	6.88	41.683	75.105	0.062827225	0.04414003	0.081151832	0.053272451	0.065445026	0.112633181	0.007853403	0.01065449	0.034031414	0.0304414	0	0.00913242	0.078534031	0.108066971	0.018324607	0.03957382	0.091623037	0.105022831	0.089005236	0.083713851	0.041884817	0.02283105	0.057591623	0.051750381	0.102094241	0.070015221	0.005235602	0.00761035	0.015706806	0.02739726	0.020942408	0.02587519	0.047120419
YBL032W_YNL268W	0	0	2	14	0	0	160187	138551	161332	140386	381	611	5.97	6.98	41.683	68.089	0.062827225	0.073529412	0.081151832	0.088235294	0.065445026	0.075163399	0.007853403	0.019607843	0.034031414	0.065359477	0	0.026143791	0.078534031	0.04248366	0.018324607	0.031045752	0.091623037	0.047385621	0.089005236	0.073529412	0.041884817	0.037581699	0.057591623	0.083333333	0.102094241	0.099673203	0.005235602	0.009803922	0.015706806	0.044117647	0.020942408	0.014705882	0.047120419
YBL032W_YGL038C	0	0	2	7	0	1	160187	426810	161332	425368	381	480	5.97	7.85	41.683	55.155	0.062827225	0.035343035	0.081151832	0.03950104	0.065445026	0.091476091	0.007853403	0.024948025	0.034031414	0.045738046	0	0.022869023	0.078534031	0.079002079	0.018324607	0.043659044	0.091623037	0.037422037	0.089005236	0.106029106	0.041884817	0.062370062	0.057591623	0.045738046	0.102094241	0.072765073	0.005235602	0.002079002	0.015706806	0.037422037	0.020942408	0.022869023	0.047120419
YBL032W_YNL265C	0	0	2	14	0	1	160187	145282	161332	144281	381	298	5.97	5.84	41.683	34.495	0.062827225	0.010033445	0.081151832	0.053511706	0.065445026	0.10367893	0.007853403	0.016722408	0.034031414	0.016722408	0	0.003344482	0.078534031	0.127090301	0.018324607	0.046822742	0.091623037	0.10367893	0.089005236	0.066889632	0.041884817	0.036789298	0.057591623	0.053511706	0.102094241	0.093645485	0.005235602	0.013377926	0.015706806	0.023411371	0.020942408	0.02006689	0.047120419
YBL032W_YLR118C	0	0	2	12	0	1	160187	385409	161332	384726	381	227	5.97	6.88	41.683	24.7	0.062827225	0.100877193	0.081151832	0.078947368	0.065445026	0.078947368	0.007853403	0.021929825	0.034031414	0.061403509	0	0.01754386	0.078534031	0.070175439	0.018324607	0.057017544	0.091623037	0.039473684	0.089005236	0.070175439	0.041884817	0.057017544	0.057591623	0.052631579	0.102094241	0.087719298	0.005235602	0.00877193	0.015706806	0.01754386	0.020942408	0.030701754	0.047120419
YBL032W_YGR147C	0	0	2	7	0	1	160187	786925	161332	786059	381	288	5.97	10.74	41.683	32.804	0.062827225	0.062283737	0.081151832	0.055363322	0.065445026	0.096885813	0.007853403	0.031141869	0.034031414	0.044982699	0	0.010380623	0.078534031	0.110726644	0.018324607	0.041522491	0.091623037	0.051903114	0.089005236	0.07266436	0.041884817	0.041522491	0.057591623	0.062283737	0.102094241	0.065743945	0.005235602	0.01384083	0.015706806	0.024221453	0.020942408	0.020761246	0.047120419
YBL032W_YPL207W	0	0	2	16	0	0	160187	159908	161332	162340	381	810	5.97	8.11	41.683	89.805	0.062827225	0.091245376	0.081151832	0.055487053	0.065445026	0.086313194	0.007853403	0.012330456	0.034031414	0.043156597	0	0.012330456	0.078534031	0.099876695	0.018324607	0.027127004	0.091623037	0.065351418	0.089005236	0.076448829	0.041884817	0.03945746	0.057591623	0.061652281	0.102094241	0.046855734	0.005235602	0.030826141	0.015706806	0.036991369	0.020942408	0.017262639	0.047120419
YBL032W_YDR399W	0	0	2	4	0	0	160187	1270061	161332	1270726	381	221	5.97	5.48	41.683	25.191	0.062827225	0.04954955	0.081151832	0.072072072	0.065445026	0.072072072	0.007853403	0.018018018	0.034031414	0.040540541	0	0.013513514	0.078534031	0.09009009	0.018324607	0.045045045	0.091623037	0.081081081	0.089005236	0.045045045	0.041884817	0.045045045	0.057591623	0.067567568	0.102094241	0.085585586	0.005235602	0.009009009	0.015706806	0.036036036	0.020942408	0.022522523	0.047120419
YBL032W_YDR214W	0	0	2	4	0	0	160187	892873	161332	893925	381	350	5.97	7.52	41.683	39.435	0.062827225	0.056980057	0.081151832	0.045584046	0.065445026	0.071225071	0.007853403	0.005698006	0.034031414	0.062678063	0	0.01994302	0.078534031	0.102564103	0.018324607	0.03988604	0.091623037	0.085470085	0.089005236	0.113960114	0.041884817	0.042735043	0.057591623	0.074074074	0.102094241	0.054131054	0.005235602	0.008547009	0.015706806	0.022792023	0.020942408	0.017094017	0.047120419
YBL032W_YLR186W	0	0	2	12	0	0	160187	523634	161332	524392	381	252	5.97	8.45	41.683	27.895	0.062827225	0.055335968	0.081151832	0.063241107	0.065445026	0.110671937	0.007853403	0.023715415	0.034031414	0.023715415	0	0.003952569	0.078534031	0.086956522	0.018324607	0.031620553	0.091623037	0.043478261	0.089005236	0.075098814	0.041884817	0.051383399	0.057591623	0.083003953	0.102094241	0.067193676	0.005235602	0.023715415	0.015706806	0.019762846	0.020942408	0.023715415	0.047120419
YBL032W_YBL087C	0	0	2	2	0	1	160187	60735	161332	59818	381	137	5.97	11.11	41.683	14.473	0.062827225	0.123188406	0.081151832	0.108695652	0.065445026	0.065217391	0.007853403	0.043478261	0.034031414	0.02173913	0	0.014492754	0.078534031	0.079710145	0.018324607	0.014492754	0.091623037	0.028985507	0.089005236	0.072463768	0.041884817	0.050724638	0.057591623	0.101449275	0.102094241	0.050724638	0.005235602	0.014492754	0.015706806	0.014492754	0.020942408	0	0.047120419
YBL032W_YOL121C	0	0	2	15	0	1	160187	92850	161332	92026	381	144	5.97	10.45	41.683	15.917	0.062827225	0.103448276	0.081151832	0.089655172	0.065445026	0.055172414	0.007853403	0.020689655	0.034031414	0.020689655	0	0.006896552	0.078534031	0.075862069	0.018324607	0.055172414	0.091623037	0.062068966	0.089005236	0.068965517	0.041884817	0.04137931	0.057591623	0.082758621	0.102094241	0.068965517	0.005235602	0	0.015706806	0.04137931	0.020942408	0.013793103	0.047120419
YBL032W_YER110C	0	0	2	5	0	1	160187	382099	161332	378758	381	1113	5.97	4.36	41.683	122.6	0.062827225	0.035008977	0.081151832	0.107719928	0.065445026	0.113105925	0.007853403	0.018850987	0.034031414	0.044883303	0	0.002692998	0.078534031	0.051166966	0.018324607	0.042190305	0.091623037	0.090664273	0.089005236	0.08438061	0.041884817	0.033213645	0.057591623	0.068222621	0.102094241	0.071813285	0.005235602	0.008078995	0.015706806	0.026032316	0.020942408	0.013464991	0.047120419
YBL032W_YJL190C	0	0	2	10	0	1	160187	75301	161332	74909	381	130	5.97	10.76	41.683	14.626	0.062827225	0.083969466	0.081151832	0.061068702	0.065445026	0.076335878	0.007853403	0.022900763	0.034031414	0.038167939	0	0.007633588	0.078534031	0.083969466	0.018324607	0.038167939	0.091623037	0.045801527	0.089005236	0.061068702	0.041884817	0.022900763	0.057591623	0.083969466	0.102094241	0.099236641	0.005235602	0.007633588	0.015706806	0.030534351	0.020942408	0.030534351	0.047120419
YBL032W_YBR287W	0	0	2	2	0	0	160187	776567	161332	777850	381	427	5.97	4.64	41.683	47.506	0.062827225	0.046728972	0.081151832	0.060747664	0.065445026	0.130841121	0.007853403	0.025700935	0.034031414	0.060747664	0	0.018691589	0.078534031	0.03271028	0.018324607	0.044392523	0.091623037	0.056074766	0.089005236	0.10046729	0.041884817	0.051401869	0.057591623	0.077102804	0.102094241	0.10046729	0.005235602	0.007009346	0.015706806	0.021028037	0.020942408	0.009345794	0.047120419
YBL032W_YJR096W	0	0	2	10	0	0	160187	611187	161332	612035	381	282	5.97	6.92	41.683	32.344	0.062827225	0.067137809	0.081151832	0.053003534	0.065445026	0.106007067	0.007853403	0.017667845	0.034031414	0.024734982	0	0.024734982	0.078534031	0.088339223	0.018324607	0.035335689	0.091623037	0.081272085	0.089005236	0.045936396	0.041884817	0.056537102	0.057591623	0.060070671	0.102094241	0.056537102	0.005235602	0.021201413	0.015706806	0.049469965	0.020942408	0.028268551	0.047120419
YBL032W_YOR320C	0	0	2	15	0	1	160187	915091	161332	913616	381	491	5.97	8.72	41.683	57.577	0.062827225	0.022357724	0.081151832	0.036585366	0.065445026	0.117886179	0.007853403	0.014227642	0.034031414	0.054878049	0	0.010162602	0.078534031	0.093495935	0.018324607	0.034552846	0.091623037	0.058943089	0.089005236	0.075203252	0.041884817	0.040650407	0.057591623	0.06300813	0.102094241	0.085365854	0.005235602	0.008130081	0.015706806	0.058943089	0.020942408	0.018292683	0.047120419
YBL032W_YOL004W	0	0	2	15	0	0	160187	316939	161332	321549	381	1536	5.97	5.42	41.683	174.838	0.062827225	0.038386467	0.081151832	0.055953155	0.065445026	0.079375407	0.007853403	0.015614834	0.034031414	0.039687703	0	0.009108653	0.078534031	0.068314899	0.018324607	0.075471698	0.091623037	0.07807417	0.089005236	0.085881588	0.041884817	0.063760573	0.057591623	0.044892648	0.102094241	0.061808718	0.005235602	0.005855563	0.015706806	0.031880286	0.020942408	0.03057905	0.047120419
YBL032W_YJL122W	0	0	2	10	0	0	160187	189714	161332	190241	381	175	5.97	10.82	41.683	19.287	0.062827225	0.051136364	0.081151832	0.073863636	0.065445026	0.107954545	0.007853403	0.011363636	0.034031414	0.017045455	0	0.005681818	0.078534031	0.130681818	0.018324607	0.039772727	0.091623037	0.056818182	0.089005236	0.119318182	0.041884817	0.034090909	0.057591623	0.045454545	0.102094241	0.045454545	0.005235602	0	0.015706806	0.011363636	0.020942408	0.017045455	0.047120419
YBL032W_YML051W	0	0	2	13	0	0	160187	171594	161332	172901	381	435	5.97	8.16	41.683	48.323	0.062827225	0.073394495	0.081151832	0.068807339	0.065445026	0.091743119	0.007853403	0.02293578	0.034031414	0.04587156	0	0.006880734	0.078534031	0.055045872	0.018324607	0.041284404	0.091623037	0.048165138	0.089005236	0.084862385	0.041884817	0.048165138	0.057591623	0.05733945	0.102094241	0.087155963	0.005235602	0.004587156	0.015706806	0.050458716	0.020942408	0.02293578	0.047120419
YBL032W_YGL022W	0	0	2	7	0	0	160187	452409	161332	454565	381	718	5.97	8.1	41.683	81.528	0.062827225	0.063977747	0.081151832	0.082058414	0.065445026	0.100139082	0.007853403	0.030598053	0.034031414	0.073713491	0	0.029207232	0.078534031	0.044506259	0.018324607	0.019471488	0.091623037	0.033379694	0.089005236	0.07093185	0.041884817	0.036161335	0.057591623	0.076495132	0.102094241	0.079276773	0.005235602	0.006954103	0.015706806	0.051460362	0.020942408	0.016689847	0.047120419
YBL032W_YKL058W	0	0	2	11	0	0	160187	329810	161332	330178	381	122	5.97	4.75	41.683	13.458	0.062827225	0.056910569	0.081151832	0.056910569	0.065445026	0.081300813	0.007853403	0.016260163	0.034031414	0.024390244	0	0.008130081	0.078534031	0.06504065	0.018324607	0.032520325	0.091623037	0.048780488	0.089005236	0.105691057	0.041884817	0.008130081	0.057591623	0.105691057	0.102094241	0.048780488	0.005235602	0.024390244	0.015706806	0.032520325	0.020942408	0.008130081	0.047120419
YBL032W_YGR034W	0	0	2	7	0	0	160187	555816	161332	556676	381	127	5.97	11.25	41.683	14.235	0.062827225	0.0546875	0.081151832	0.078125	0.065445026	0.109375	0.007853403	0.0078125	0.034031414	0.015625	0	0	0.078534031	0.140625	0.018324607	0.0390625	0.091623037	0.046875	0.089005236	0.09375	0.041884817	0.0390625	0.057591623	0.09375	0.102094241	0.046875	0.005235602	0	0.015706806	0.0234375	0.020942408	0.015625	0.047120419
YBL032W_YDR041W	0	0	2	4	0	0	160187	539801	161332	540412	381	203	5.97	10.1	41.683	23.424	0.062827225	0.044117647	0.081151832	0.053921569	0.065445026	0.117647059	0.007853403	0.019607843	0.034031414	0.039215686	0	0.009803922	0.078534031	0.078431373	0.018324607	0.029411765	0.091623037	0.053921569	0.089005236	0.073529412	0.041884817	0.053921569	0.057591623	0.049019608	0.102094241	0.058823529	0.005235602	0.004901961	0.015706806	0.049019608	0.020942408	0.024509804	0.047120419
YBL032W_YDR225W	0	0	2	4	0	0	160187	915527	161332	915925	381	132	5.97	11.43	41.683	13.989	0.062827225	0.105263158	0.081151832	0.142857143	0.065445026	0.127819549	0.007853403	0.007518797	0.034031414	0.007518797	0	0	0.078534031	0.082706767	0.018324607	0.045112782	0.091623037	0.037593985	0.089005236	0.060150376	0.041884817	0.037593985	0.057591623	0.045112782	0.102094241	0.052631579	0.005235602	0	0.015706806	0.022556391	0.020942408	0.022556391	0.047120419
YBL032W_YKL117W	0	0	2	11	0	0	160187	219968	161332	220618	381	216	5.97	4.29	41.683	24.082	0.062827225	0.092165899	0.081151832	0.078341014	0.065445026	0.059907834	0.007853403	0.046082949	0.034031414	0.023041475	0	0.013824885	0.078534031	0.078341014	0.018324607	0.059907834	0.091623037	0.105990783	0.089005236	0.050691244	0.041884817	0.046082949	0.057591623	0.050691244	0.102094241	0.046082949	0.005235602	0.004608295	0.015706806	0.041474654	0.020942408	0.02764977	0.047120419
YBL032W_YBL026W	0	0	2	2	0	0	160187	170626	161332	171041	381	95	5.97	8.4	41.683	11.163	0.062827225	0.03125	0.081151832	0.010416667	0.065445026	0.114583333	0.007853403	0.03125	0.034031414	0.0625	0	0	0.078534031	0.083333333	0.018324607	0.041666667	0.091623037	0.0625	0.089005236	0.052083333	0.041884817	0.010416667	0.057591623	0.104166667	0.102094241	0.052083333	0.005235602	0.010416667	0.015706806	0.03125	0.020942408	0.010416667	0.047120419
YBL032W_YDL236W	0	0	2	4	0	0	160187	32296	161332	33234	381	312	5.97	6.3	41.683	34.624	0.062827225	0.089456869	0.081151832	0.051118211	0.065445026	0.115015974	0.007853403	0.019169329	0.034031414	0.057507987	0	0.006389776	0.078534031	0.076677316	0.018324607	0.038338658	0.091623037	0.047923323	0.089005236	0.073482428	0.041884817	0.03514377	0.057591623	0.057507987	0.102094241	0.054313099	0.005235602	0.015974441	0.015706806	0.041533546	0.020942408	0.009584665	0.047120419
YBL032W_YLR450W	0	0	2	12	0	0	160187	1032624	161332	1035761	381	1045	5.97	7.52	41.683	115.691	0.062827225	0.051625239	0.081151832	0.073613767	0.065445026	0.115678776	0.007853403	0.023900574	0.034031414	0.04206501	0	0.006692161	0.078534031	0.056405354	0.018324607	0.027724665	0.091623037	0.04875717	0.089005236	0.093690249	0.041884817	0.041108987	0.057591623	0.070745698	0.102094241	0.078393881	0.005235602	0.018164436	0.015706806	0.040152964	0.020942408	0.020076482	0.047120419
YBL032W_YMR236W	0	0	2	13	0	0	160187	742970	161332	743443	381	157	5.97	6.27	41.683	17.315	0.062827225	0.082278481	0.081151832	0.082278481	0.065445026	0.120253165	0.007853403	0.03164557	0.034031414	0.012658228	0	0.012658228	0.078534031	0.063291139	0.018324607	0.063291139	0.091623037	0.063291139	0.089005236	0.063291139	0.041884817	0.056962025	0.057591623	0.069620253	0.102094241	0.018987342	0.005235602	0.006329114	0.015706806	0.037974684	0.020942408	0.018987342	0.047120419
YBL032W_YLR344W	0	0	2	12	0	0	160187	819312	161332	820142	381	127	5.97	11.35	41.683	14.234	0.062827225	0.0546875	0.081151832	0.078125	0.065445026	0.109375	0.007853403	0.0078125	0.034031414	0.015625	0	0	0.078534031	0.140625	0.018324607	0.046875	0.091623037	0.0390625	0.089005236	0.09375	0.041884817	0.0390625	0.057591623	0.09375	0.102094241	0.046875	0.005235602	0	0.015706806	0.0234375	0.020942408	0.015625	0.047120419
YBL032W_YNL149C	0	0	2	14	0	1	160187	349758	161332	349369	381	129	5.97	5.51	41.683	15.053	0.062827225	0.038461538	0.081151832	0.092307692	0.065445026	0.1	0.007853403	0.015384615	0.034031414	0.023076923	0	0.023076923	0.078534031	0.107692308	0.018324607	0.038461538	0.091623037	0.115384615	0.089005236	0.038461538	0.041884817	0.015384615	0.057591623	0.053846154	0.102094241	0.046153846	0.005235602	0	0.015706806	0.023076923	0.020942408	0.007692308	0.047120419
YBL032W_YGR019W	0	0	2	7	0	0	160187	525233	161332	526648	381	471	5.97	6.78	41.683	52.946	0.062827225	0.065677966	0.081151832	0.086864407	0.065445026	0.093220339	0.007853403	0.008474576	0.034031414	0.048728814	0	0.012711864	0.078534031	0.084745763	0.018324607	0.040254237	0.091623037	0.065677966	0.089005236	0.059322034	0.041884817	0.061440678	0.057591623	0.042372881	0.102094241	0.061440678	0.005235602	0.016949153	0.015706806	0.046610169	0.020942408	0.025423729	0.047120419
YBL032W_YOL021C	0	0	2	15	0	1	160187	285427	161332	282422	381	1001	5.97	6.63	41.683	113.706	0.062827225	0.03493014	0.081151832	0.064870259	0.065445026	0.093812375	0.007853403	0.021956088	0.034031414	0.036926148	0	0.006986028	0.078534031	0.061876248	0.018324607	0.031936128	0.091623037	0.058882236	0.089005236	0.073852295	0.041884817	0.052894212	0.057591623	0.083832335	0.102094241	0.058882236	0.005235602	0.01497006	0.015706806	0.032934132	0.020942408	0.020958084	0.047120419
YBL032W_YBR079C	0	0	2	2	0	1	160187	398271	161332	395377	381	964	5.97	6.24	41.683	110.343	0.062827225	0.026943005	0.081151832	0.095336788	0.065445026	0.09119171	0.007853403	0.019689119	0.034031414	0.027979275	0	0.006217617	0.078534031	0.099481865	0.018324607	0.043523316	0.091623037	0.117098446	0.089005236	0.066321244	0.041884817	0.037305699	0.057591623	0.058031088	0.102094241	0.055958549	0.005235602	0.001036269	0.015706806	0.032124352	0.020942408	0.01865285	0.047120419
YBL032W_YMR241W	0	0	2	13	0	0	160187	751960	161332	752904	381	314	5.97	10.68	41.683	34.184	0.062827225	0.114285714	0.081151832	0.073015873	0.065445026	0.076190476	0.007853403	0.028571429	0.034031414	0.044444444	0	0.022222222	0.078534031	0.079365079	0.018324607	0.028571429	0.091623037	0.050793651	0.089005236	0.066666667	0.041884817	0.034920635	0.057591623	0.079365079	0.102094241	0.06031746	0.005235602	0.00952381	0.015706806	0.025396825	0.020942408	0.00952381	0.047120419
YBL032W_YOR335C	0	0	2	15	0	1	160187	949106	161332	946230	381	958	5.97	5.27	41.683	107.276	0.062827225	0.079249218	0.081151832	0.070907195	0.065445026	0.082377477	0.007853403	0.010427529	0.034031414	0.055265902	0	0.008342023	0.078534031	0.094890511	0.018324607	0.027111575	0.091623037	0.081334724	0.089005236	0.052137643	0.041884817	0.039624609	0.057591623	0.063607925	0.102094241	0.058394161	0.005235602	0.00729927	0.015706806	0.03649635	0.020942408	0.016684046	0.047120419
YBL032W_YBL028C	0	0	2	2	0	1	160187	167841	161332	167521	381	106	5.97	10.97	41.683	12.401	0.062827225	0.037383178	0.081151832	0.065420561	0.065445026	0.074766355	0.007853403	0.028037383	0.034031414	0.028037383	0	0.009345794	0.078534031	0.205607477	0.018324607	0.046728972	0.091623037	0.074766355	0.089005236	0.093457944	0.041884817	0.009345794	0.057591623	0.037383178	0.102094241	0.028037383	0.005235602	0	0.015706806	0.009345794	0.020942408	0.028037383	0.047120419
YBL032W_YDR190C	0	0	2	4	0	1	160187	841993	161332	840602	381	463	5.97	5.7	41.683	50.453	0.062827225	0.077586207	0.081151832	0.077586207	0.065445026	0.103448276	0.007853403	0.017241379	0.034031414	0.015086207	0	0	0.078534031	0.073275862	0.018324607	0.025862069	0.091623037	0.092672414	0.089005236	0.05387931	0.041884817	0.040948276	0.057591623	0.096982759	0.102094241	0.073275862	0.005235602	0.006465517	0.015706806	0.025862069	0.020942408	0.012931034	0.047120419
YBL032W_YAL032C	0	0	2	1	0	1	160187	84475	161332	83336	381	379	5.97	9.93	41.683	42.482	0.062827225	0.042105263	0.081151832	0.092105263	0.065445026	0.076315789	0.007853403	0.018421053	0.034031414	0.023684211	0	0.005263158	0.078534031	0.089473684	0.018324607	0.05	0.091623037	0.076315789	0.089005236	0.081578947	0.041884817	0.052631579	0.057591623	0.063157895	0.102094241	0.039473684	0.005235602	0.002631579	0.015706806	0.026315789	0.020942408	0.021052632	0.047120419
YBL032W_YDR397C	0	0	2	4	0	1	160187	1266891	161332	1266359	381	146	5.97	4.72	41.683	16.65	0.062827225	0.027210884	0.081151832	0.054421769	0.065445026	0.095238095	0.007853403	0.040816327	0.034031414	0.047619048	0	0	0.078534031	0.088435374	0.018324607	0.040816327	0.091623037	0.129251701	0.089005236	0.12244898	0.041884817	0.027210884	0.057591623	0.040816327	0.102094241	0.081632653	0.005235602	0	0.015706806	0.006802721	0.020942408	0.020408163	0.047120419
YBL032W_YEL038W	0	0	2	5	0	0	160187	80462	161332	81145	381	227	5.97	5.36	41.683	25.187	0.062827225	0.065789474	0.081151832	0.078947368	0.065445026	0.092105263	0.007853403	0.004385965	0.034031414	0.043859649	0	0.004385965	0.078534031	0.074561404	0.018324607	0.061403509	0.091623037	0.039473684	0.089005236	0.070175439	0.041884817	0.052631579	0.057591623	0.070175439	0.102094241	0.065789474	0.005235602	0.004385965	0.015706806	0.057017544	0.020942408	0.01754386	0.047120419
YBL032W_YKL214C	0	0	2	11	0	1	160187	31694	161332	31083	381	203	5.97	10.2	41.683	23.777	0.062827225	0.049019608	0.081151832	0.049019608	0.065445026	0.053921569	0.007853403	0.019607843	0.034031414	0.029411765	0	0	0.078534031	0.088235294	0.018324607	0.024509804	0.091623037	0.093137255	0.089005236	0.073529412	0.041884817	0.058823529	0.057591623	0.034313725	0.102094241	0.058823529	0.005235602	0.004901961	0.015706806	0.039215686	0.020942408	0.039215686	0.047120419
YBL032W_YOR187W	0	0	2	15	0	0	160187	684031	161332	685344	381	437	5.97	6.64	41.683	47.972	0.062827225	0.089041096	0.081151832	0.082191781	0.065445026	0.084474886	0.007853403	0.04109589	0.034031414	0.029680365	0	0	0.078534031	0.050228311	0.018324607	0.02739726	0.091623037	0.075342466	0.089005236	0.043378995	0.041884817	0.043378995	0.057591623	0.073059361	0.102094241	0.070776256	0.005235602	0.006849315	0.015706806	0.020547945	0.020942408	0.03196347	0.047120419
YBL032W_YJL109C	0	0	2	10	0	1	160187	217304	161332	211995	381	1769	5.97	6.45	41.683	200.079	0.062827225	0.023163842	0.081151832	0.053672316	0.065445026	0.14519774	0.007853403	0.013559322	0.034031414	0.053672316	0	0.005649718	0.078534031	0.071751412	0.018324607	0.027118644	0.091623037	0.071186441	0.089005236	0.105649718	0.041884817	0.025423729	0.057591623	0.067231638	0.102094241	0.079661017	0.005235602	0.009039548	0.015706806	0.024858757	0.020942408	0.01299435	0.047120419
YBL032W_YBR210W	0	0	2	2	0	0	160187	645545	161332	645973	381	142	5.97	8.04	41.683	16.347	0.062827225	0.048951049	0.081151832	0.062937063	0.065445026	0.174825175	0.007853403	0.013986014	0.034031414	0.097902098	0	0.006993007	0.078534031	0.048951049	0.018324607	0.013986014	0.091623037	0.034965035	0.089005236	0.055944056	0.041884817	0.013986014	0.057591623	0.055944056	0.102094241	0.083916084	0.005235602	0.034965035	0.015706806	0.062937063	0.020942408	0.006993007	0.047120419
YBL032W_YIL106W	0	0	2	9	0	0	160187	166412	161332	167441	381	314	5.97	6.57	41.683	35.882	0.062827225	0.047619048	0.081151832	0.053968254	0.065445026	0.079365079	0.007853403	0.022222222	0.034031414	0.063492063	0	0.012698413	0.078534031	0.028571429	0.018324607	0.063492063	0.091623037	0.06031746	0.089005236	0.050793651	0.041884817	0.073015873	0.057591623	0.057142857	0.102094241	0.044444444	0.005235602	0.022222222	0.015706806	0.028571429	0.020942408	0.034920635	0.047120419
YBL032W_YMR278W	0	0	2	13	0	0	160187	822762	161332	824630	381	622	5.97	6.22	41.683	71.069	0.062827225	0.057784912	0.081151832	0.060995185	0.065445026	0.080256822	0.007853403	0.027287319	0.034031414	0.056179775	0	0.016051364	0.078534031	0.075441413	0.018324607	0.035313002	0.091623037	0.069020867	0.089005236	0.056179775	0.041884817	0.056179775	0.057591623	0.07223114	0.102094241	0.056179775	0.005235602	0.009630819	0.015706806	0.04494382	0.020942408	0.030497592	0.047120419
YBL032W_YOR292C	0	0	2	15	0	1	160187	866581	161332	865652	381	309	5.97	5.84	41.683	36.195	0.062827225	0.04516129	0.081151832	0.041935484	0.065445026	0.096774194	0.007853403	0.029032258	0.034031414	0.096774194	0	0.029032258	0.078534031	0.025806452	0.018324607	0.048387097	0.091623037	0.025806452	0.089005236	0.080645161	0.041884817	0.035483871	0.057591623	0.061290323	0.102094241	0.05483871	0.005235602	0.019354839	0.015706806	0.048387097	0.020942408	0.025806452	0.047120419
YBL032W_YNL157W	0	0	2	14	0	0	160187	340354	161332	340860	381	168	5.97	10.2	41.683	18.051	0.062827225	0.082840237	0.081151832	0.029585799	0.065445026	0.065088757	0.007853403	0.023668639	0.034031414	0.017751479	0	0	0.078534031	0.088757396	0.018324607	0.023668639	0.091623037	0.035502959	0.089005236	0.165680473	0.041884817	0.071005917	0.057591623	0.017751479	0.102094241	0.065088757	0.005235602	0.00591716	0.015706806	0.035502959	0.020942408	0.01183432	0.047120419
YBL032W_YOR174W	0	0	2	15	0	0	160187	658748	161332	659602	381	284	5.97	4.36	41.683	32.205	0.062827225	0.031578947	0.081151832	0.059649123	0.065445026	0.105263158	0.007853403	0.021052632	0.034031414	0.038596491	0	0.003508772	0.078534031	0.094736842	0.018324607	0.031578947	0.091623037	0.115789474	0.089005236	0.073684211	0.041884817	0.042105263	0.057591623	0.049122807	0.102094241	0.045614035	0.005235602	0.007017544	0.015706806	0.01754386	0.020942408	0.010526316	0.047120419
YBL032W_YML001W	0	0	2	13	0	0	160187	267174	161332	267800	381	208	5.97	4.62	41.683	23.043	0.062827225	0.052631579	0.081151832	0.090909091	0.065445026	0.066985646	0.007853403	0.014354067	0.034031414	0.04784689	0	0.009569378	0.078534031	0.071770335	0.018324607	0.043062201	0.091623037	0.066985646	0.089005236	0.086124402	0.041884817	0.014354067	0.057591623	0.076555024	0.102094241	0.062200957	0.005235602	0.019138756	0.015706806	0.028708134	0.020942408	0.009569378	0.047120419
YBL032W_YDR100W	0	0	2	4	0	0	160187	655011	161332	655442	381	143	5.97	4.17	41.683	15.881	0.062827225	0.069444444	0.081151832	0.069444444	0.065445026	0.118055556	0.007853403	0.020833333	0.034031414	0.111111111	0	0	0.078534031	0.020833333	0.018324607	0.013888889	0.091623037	0.020833333	0.089005236	0.097222222	0.041884817	0.041666667	0.057591623	0.0625	0.102094241	0.131944444	0.005235602	0.006944444	0.015706806	0.055555556	0.020942408	0.006944444	0.047120419
YBL032W_YDR264C	0	0	2	4	0	1	160187	998320	161332	996026	381	764	5.97	5.53	41.683	85.839	0.062827225	0.066666667	0.081151832	0.05751634	0.065445026	0.11372549	0.007853403	0.018300654	0.034031414	0.064052288	0	0.019607843	0.078534031	0.052287582	0.018324607	0.02745098	0.091623037	0.052287582	0.089005236	0.065359477	0.041884817	0.040522876	0.057591623	0.069281046	0.102094241	0.064052288	0.005235602	0.015686275	0.015706806	0.02875817	0.020942408	0.02745098	0.047120419
YJL080C_YOL077C	0	0	10	15	1	1	289220	186723	285552	185848	1222	291	5.67	10	134.808	33.577	0.050695012	0.04109589	0.073589534	0.051369863	0.068683565	0.095890411	0.012264922	0.017123288	0.028618152	0.044520548	0.003270646	0.006849315	0.098119379	0.099315068	0.022894522	0.047945205	0.098119379	0.075342466	0.090760425	0.078767123	0.045789043	0.047945205	0.07686018	0.058219178	0.080948487	0.061643836	0.003270646	0.010273973	0.02207686	0.034246575	0.015535568	0.030821918	0.035977105
YJL080C_YOR220W	0	0	10	15	1	0	289220	755329	285552	756126	1222	265	5.67	7.51	134.808	29.255	0.050695012	0.030075188	0.073589534	0.037593985	0.068683565	0.127819549	0.012264922	0.015037594	0.028618152	0.045112782	0.003270646	0.003759398	0.098119379	0.071428571	0.022894522	0.052631579	0.098119379	0.045112782	0.090760425	0.154135338	0.045789043	0.071428571	0.07686018	0.026315789	0.080948487	0.037593985	0.003270646	0.007518797	0.02207686	0.011278195	0.015535568	0.015037594	0.035977105
YJL080C_YKL160W	0	0	10	11	1	0	289220	153274	285552	153711	1222	145	5.67	4.32	134.808	16.157	0.050695012	0.075342466	0.073589534	0.020547945	0.068683565	0.047945205	0.012264922	0.006849315	0.028618152	0.02739726	0.003270646	0.006849315	0.098119379	0.089041096	0.022894522	0.047945205	0.098119379	0.089041096	0.090760425	0.123287671	0.045789043	0.01369863	0.07686018	0.061643836	0.080948487	0.034246575	0.003270646	0.034246575	0.02207686	0.01369863	0.015535568	0.006849315	0.035977105
YJL080C_YML102W	0	0	10	13	1	0	289220	68294	285552	69700	1222	468	5.67	6.3	134.808	51.252	0.050695012	0.074626866	0.073589534	0.076759062	0.068683565	0.085287846	0.012264922	0.014925373	0.028618152	0.031982942	0.003270646	0.017057569	0.098119379	0.053304904	0.022894522	0.034115139	0.098119379	0.049040512	0.090760425	0.087420043	0.045789043	0.051172708	0.07686018	0.089552239	0.080948487	0.053304904	0.003270646	0.021321962	0.02207686	0.029850746	0.015535568	0.023454158	0.035977105
YJL080C_YPL127C	0	0	10	16	1	1	289220	309603	285552	308827	1222	258	5.67	11.02	134.808	27.803	0.050695012	0.054054054	0.073589534	0.096525097	0.068683565	0.061776062	0.012264922	0.011583012	0.028618152	0.027027027	0.003270646	0	0.098119379	0.223938224	0.022894522	0.015444015	0.098119379	0.057915058	0.090760425	0.127413127	0.045789043	0.057915058	0.07686018	0.054054054	0.080948487	0.042471042	0.003270646	0.003861004	0.02207686	0.023166023	0.015535568	0	0.035977105
YJL080C_YPL047W	0	0	10	16	1	0	289220	465959	285552	466258	1222	99	5.67	7.26	134.808	11.285	0.050695012	0.05	0.073589534	0.05	0.068683565	0.12	0.012264922	0.01	0.028618152	0.01	0.003270646	0	0.098119379	0.02	0.022894522	0.09	0.098119379	0.05	0.090760425	0.08	0.045789043	0.02	0.07686018	0.02	0.080948487	0.08	0.003270646	0.03	0.02207686	0.04	0.015535568	0.02	0.035977105
YJL080C_YBR164C	0	0	10	2	1	1	289220	568421	285552	567870	1222	183	5.67	4.64	134.808	20.434	0.050695012	0.070652174	0.073589534	0.065217391	0.068683565	0.130434783	0.012264922	0.02173913	0.028618152	0.027173913	0.003270646	0.027173913	0.098119379	0.070652174	0.022894522	0.038043478	0.098119379	0.076086957	0.090760425	0.081521739	0.045789043	0.016304348	0.07686018	0.065217391	0.080948487	0.070652174	0.003270646	0.005434783	0.02207686	0.027173913	0.015535568	0.005434783	0.035977105
YJL080C_YBR071W	0	0	10	2	1	0	289220	380408	285552	381043	1222	211	5.67	8.43	134.808	23.548	0.050695012	0.023584906	0.073589534	0.051886792	0.068683565	0.094339623	0.012264922	0.033018868	0.028618152	0.037735849	0.003270646	0	0.098119379	0.08490566	0.022894522	0.033018868	0.098119379	0.056603774	0.090760425	0.198113208	0.045789043	0.018867925	0.07686018	0.004716981	0.080948487	0.04245283	0.003270646	0.004716981	0.02207686	0.014150943	0.015535568	0.033018868	0.035977105
YJL080C_YNL255C	0	0	10	14	1	1	289220	167791	285552	167330	1222	153	5.67	7.71	134.808	17.103	0.050695012	0.084415584	0.073589534	0.032467532	0.068683565	0.025974026	0.012264922	0.032467532	0.028618152	0.019480519	0.003270646	0	0.098119379	0.084415584	0.022894522	0.045454545	0.098119379	0.058441558	0.090760425	0.064935065	0.045789043	0.038961039	0.07686018	0.038961039	0.080948487	0.025974026	0.003270646	0.136363636	0.02207686	0.038961039	0.015535568	0.045454545	0.035977105
YJL080C_YLR109W	0	0	10	12	1	0	289220	368782	285552	369312	1222	176	5.67	4.87	134.808	19.115	0.050695012	0.062146893	0.073589534	0.09039548	0.068683565	0.04519774	0.012264922	0.016949153	0.028618152	0.039548023	0.003270646	0.02259887	0.098119379	0.079096045	0.022894522	0.028248588	0.098119379	0.056497175	0.090760425	0.09039548	0.045789043	0.04519774	0.07686018	0.11299435	0.080948487	0.062146893	0.003270646	0.016949153	0.02207686	0.033898305	0.015535568	0.016949153	0.035977105
YJL080C_YOR312C	0	0	10	15	1	1	289220	901191	285552	900247	1222	172	5.67	11.12	134.808	20.437	0.050695012	0.023121387	0.073589534	0.069364162	0.068683565	0.052023121	0.012264922	0.023121387	0.028618152	0.057803468	0.003270646	0.011560694	0.098119379	0.10982659	0.022894522	0.040462428	0.098119379	0.057803468	0.090760425	0.069364162	0.045789043	0.040462428	0.07686018	0.086705202	0.080948487	0.057803468	0.003270646	0	0.02207686	0.052023121	0.015535568	0.040462428	0.035977105
YJL080C_YDR033W	0	0	10	4	1	0	289220	508145	285552	509107	1222	320	5.67	9.85	134.808	36.19	0.050695012	0.065420561	0.073589534	0.074766355	0.068683565	0.074766355	0.012264922	0.031152648	0.028618152	0.087227414	0.003270646	0.028037383	0.098119379	0.07165109	0.022894522	0.021806854	0.098119379	0.021806854	0.090760425	0.062305296	0.045789043	0.059190031	0.07686018	0.049844237	0.080948487	0.090342679	0.003270646	0.031152648	0.02207686	0.040498442	0.015535568	0.018691589	0.035977105
YJL080C_YAR015W	0	0	10	1	1	0	289220	169370	285552	170290	1222	306	5.67	5.8	134.808	34.603	0.050695012	0.061889251	0.073589534	0.061889251	0.068683565	0.094462541	0.012264922	0.009771987	0.028618152	0.035830619	0.003270646	0.016286645	0.098119379	0.094462541	0.022894522	0.029315961	0.098119379	0.084690554	0.090760425	0.06514658	0.045789043	0.042345277	0.07686018	0.068403909	0.080948487	0.071661238	0.003270646	0.003257329	0.02207686	0.039087948	0.015535568	0.019543974	0.035977105
YJL080C_YHR104W	0	0	10	8	1	0	289220	323412	285552	324395	1222	327	5.67	7.07	134.808	37.118	0.050695012	0.067073171	0.073589534	0.051829268	0.068683565	0.109756098	0.012264922	0.012195122	0.028618152	0.048780488	0.003270646	0.015243902	0.098119379	0.088414634	0.022894522	0.036585366	0.098119379	0.067073171	0.090760425	0.054878049	0.045789043	0.045731707	0.07686018	0.06097561	0.080948487	0.073170732	0.003270646	0.018292683	0.02207686	0.036585366	0.015535568	0.033536585	0.035977105
YJL080C_YER057C	0	0	10	5	1	1	289220	271124	285552	270735	1222	129	5.67	5.19	134.808	13.906	0.050695012	0.023076923	0.073589534	0.146153846	0.068683565	0.069230769	0.012264922	0.030769231	0.028618152	0.038461538	0.003270646	0	0.098119379	0.053846154	0.022894522	0.023076923	0.098119379	0.061538462	0.090760425	0.076923077	0.045789043	0.046153846	0.07686018	0.107692308	0.080948487	0.069230769	0.003270646	0.015384615	0.02207686	0.023076923	0.015535568	0.023076923	0.035977105
YJL080C_YNL190W	0	0	10	14	1	0	289220	282396	285552	283010	1222	204	5.67	11.21	134.808	21.966	0.050695012	0.092682927	0.073589534	0.063414634	0.068683565	0.043902439	0.012264922	0.004878049	0.028618152	0.048780488	0.003270646	0	0.098119379	0.170731707	0.022894522	0	0.098119379	0.009756098	0.090760425	0.092682927	0.045789043	0.03902439	0.07686018	0.024390244	0.080948487	0.009756098	0.003270646	0	0.02207686	0.034146341	0.015535568	0.068292683	0.035977105
YJL080C_YJL151C	0	0	10	10	1	1	289220	136769	285552	136368	1222	133	5.67	4.83	134.808	15.199	0.050695012	0.02238806	0.073589534	0.097014925	0.068683565	0.119402985	0.012264922	0.037313433	0.028618152	0.037313433	0.003270646	0.007462687	0.098119379	0.029850746	0.022894522	0.029850746	0.098119379	0.052238806	0.090760425	0.067164179	0.045789043	0.059701493	0.07686018	0.059701493	0.080948487	0.037313433	0.003270646	0.007462687	0.02207686	0.037313433	0.015535568	0.044776119	0.035977105
YJL080C_YKR007W	0	0	10	11	1	0	289220	451077	285552	451631	1222	184	5.67	4.73	134.808	20.242	0.050695012	0.07027027	0.073589534	0.07027027	0.068683565	0.091891892	0.012264922	0.016216216	0.028618152	0.016216216	0.003270646	0	0.098119379	0.048648649	0.022894522	0.081081081	0.098119379	0.097297297	0.090760425	0.097297297	0.045789043	0.032432432	0.07686018	0.032432432	0.080948487	0.048648649	0.003270646	0.010810811	0.02207686	0.010810811	0.015535568	0.032432432	0.035977105
YJL080C_YGL048C	0	0	10	7	1	1	289220	411289	285552	410072	1222	405	5.67	9.71	134.808	45.271	0.050695012	0.066502463	0.073589534	0.064039409	0.068683565	0.091133005	0.012264922	0.034482759	0.028618152	0.024630542	0.003270646	0	0.098119379	0.088669951	0.022894522	0.032019704	0.098119379	0.086206897	0.090760425	0.0591133	0.045789043	0.039408867	0.07686018	0.091133005	0.080948487	0.07635468	0.003270646	0.009852217	0.02207686	0.019704433	0.015535568	0.019704433	0.035977105
YJL080C_YER063W	0	0	10	5	1	0	289220	281708	285552	282364	1222	218	5.67	7.54	134.808	24.137	0.050695012	0.054794521	0.073589534	0.082191781	0.068683565	0.082191781	0.012264922	0.00456621	0.028618152	0.01369863	0.003270646	0	0.098119379	0.105022831	0.022894522	0.059360731	0.098119379	0.118721461	0.090760425	0.100456621	0.045789043	0.0456621	0.07686018	0.050228311	0.080948487	0.02739726	0.003270646	0	0.02207686	0.00913242	0.015535568	0.00456621	0.035977105
YJL080C_YCR082W	0	0	10	3	1	0	289220	258880	285552	259266	1222	128	5.67	4.6	134.808	15.117	0.050695012	0.023255814	0.073589534	0.054263566	0.068683565	0.124031008	0.012264922	0.007751938	0.028618152	0.054263566	0.003270646	0.015503876	0.098119379	0.069767442	0.022894522	0.085271318	0.098119379	0.069767442	0.090760425	0.023255814	0.045789043	0.015503876	0.07686018	0.046511628	0.080948487	0.07751938	0.003270646	0.007751938	0.02207686	0.031007752	0.015535568	0.023255814	0.035977105
YJL080C_YER012W	0	0	10	5	1	0	289220	177834	285552	178430	1222	198	5.67	6.15	134.808	22.516	0.050695012	0.065326633	0.073589534	0.050251256	0.068683565	0.095477387	0.012264922	0.025125628	0.028618152	0.035175879	0.003270646	0	0.098119379	0.070351759	0.022894522	0.065326633	0.098119379	0.055276382	0.090760425	0.075376884	0.045789043	0.035175879	0.07686018	0.075376884	0.080948487	0.070351759	0.003270646	0.005025126	0.02207686	0.055276382	0.015535568	0.020100503	0.035977105
YJL080C_YBR202W	0	0	10	2	1	0	289220	625767	285552	628304	1222	845	5.67	5	134.808	94.874	0.050695012	0.044917258	0.073589534	0.063829787	0.068683565	0.105200946	0.012264922	0.029550827	0.028618152	0.03427896	0.003270646	0.001182033	0.098119379	0.060283688	0.022894522	0.048463357	0.098119379	0.06501182	0.090760425	0.070921986	0.045789043	0.042553191	0.07686018	0.067375887	0.080948487	0.062647754	0.003270646	0.014184397	0.02207686	0.028368794	0.015535568	0.011820331	0.035977105
YJL080C_YBR096W	0	0	10	2	1	0	289220	436015	285552	436707	1222	230	5.67	8.48	134.808	27.092	0.050695012	0.038961039	0.073589534	0.034632035	0.068683565	0.103896104	0.012264922	0.021645022	0.028618152	0.077922078	0.003270646	0.012987013	0.098119379	0.095238095	0.022894522	0.017316017	0.098119379	0.069264069	0.090760425	0.082251082	0.045789043	0.034632035	0.07686018	0.047619048	0.080948487	0.060606061	0.003270646	0.038961039	0.02207686	0.082251082	0.015535568	0.012987013	0.035977105
YJL080C_YER156C	0	0	10	5	1	1	289220	484336	285552	483320	1222	338	5.67	7.5	134.808	38.174	0.050695012	0.064896755	0.073589534	0.064896755	0.068683565	0.08259587	0.012264922	0.017699115	0.028618152	0.061946903	0.003270646	0.014749263	0.098119379	0.08259587	0.022894522	0.026548673	0.098119379	0.064896755	0.090760425	0.091445428	0.045789043	0.038348083	0.07686018	0.061946903	0.080948487	0.064896755	0.003270646	0.01179941	0.02207686	0.029498525	0.015535568	0.020648968	0.035977105
YJL080C_YOR327C	0	0	10	15	1	1	289220	931078	285552	930731	1222	115	5.67	9.28	134.808	12.957	0.050695012	0.043103448	0.073589534	0.068965517	0.068683565	0.068965517	0.012264922	0.043103448	0.028618152	0.025862069	0.003270646	0.017241379	0.098119379	0.060344828	0.022894522	0.034482759	0.098119379	0.051724138	0.090760425	0.077586207	0.045789043	0.051724138	0.07686018	0.103448276	0.080948487	0.086206897	0.003270646	0.00862069	0.02207686	0.017241379	0.015535568	0.00862069	0.035977105
YJL080C_YFL046W	0	0	10	6	1	0	289220	42815	285552	43438	1222	207	5.67	7.64	134.808	24.018	0.050695012	0.043269231	0.073589534	0.043269231	0.068683565	0.115384615	0.012264922	0.028846154	0.028618152	0.043269231	0.003270646	0.004807692	0.098119379	0.076923077	0.022894522	0.0625	0.098119379	0.081730769	0.090760425	0.052884615	0.045789043	0.009615385	0.07686018	0.057692308	0.080948487	0.067307692	0.003270646	0.009615385	0.02207686	0.014423077	0.015535568	0.033653846	0.035977105
YJL080C_YNL100W	0	0	10	14	1	0	289220	437615	285552	438319	1222	234	5.67	10.18	134.808	26.96	0.050695012	0.038297872	0.073589534	0.072340426	0.068683565	0.10212766	0.012264922	0.004255319	0.028618152	0.038297872	0.003270646	0.025531915	0.098119379	0.076595745	0.022894522	0.05106383	0.098119379	0.059574468	0.090760425	0.080851064	0.045789043	0.034042553	0.07686018	0.068085106	0.080948487	0.063829787	0.003270646	0.008510638	0.02207686	0.042553191	0.015535568	0.025531915	0.035977105
YJL080C_YER117W	0	0	10	5	1	0	289220	396765	285552	397649	1222	137	5.67	11.11	134.808	14.473	0.050695012	0.123188406	0.073589534	0.108695652	0.068683565	0.065217391	0.012264922	0.043478261	0.028618152	0.02173913	0.003270646	0.014492754	0.098119379	0.079710145	0.022894522	0.014492754	0.098119379	0.028985507	0.090760425	0.072463768	0.045789043	0.050724638	0.07686018	0.101449275	0.080948487	0.050724638	0.003270646	0.014492754	0.02207686	0.014492754	0.015535568	0	0.035977105
YJL080C_YPR188C	0	0	10	16	1	1	289220	912475	285552	911984	1222	163	5.67	4.15	134.808	18.52	0.050695012	0.06097561	0.073589534	0.042682927	0.068683565	0.115853659	0.012264922	0.024390244	0.028618152	0.067073171	0.003270646	0.006097561	0.098119379	0.067073171	0.022894522	0.036585366	0.098119379	0.12804878	0.090760425	0.067073171	0.045789043	0.030487805	0.07686018	0.030487805	0.080948487	0.048780488	0.003270646	0	0.02207686	0.012195122	0.015535568	0.012195122	0.035977105
YJL080C_YGL097W	0	0	10	7	1	0	289220	321785	285552	323233	1222	482	5.67	6.02	134.808	53.013	0.050695012	0.091097308	0.073589534	0.078674948	0.068683565	0.082815735	0.012264922	0.022774327	0.028618152	0.039337474	0.003270646	0.016563147	0.098119379	0.072463768	0.022894522	0.033126294	0.098119379	0.060041408	0.090760425	0.062111801	0.045789043	0.047619048	0.07686018	0.068322981	0.080948487	0.041407867	0.003270646	0.01863354	0.02207686	0.022774327	0.015535568	0.031055901	0.035977105
YJL080C_YML085C	0	0	10	13	1	1	289220	99400	285552	97941	1222	447	5.67	4.81	134.808	49.8	0.050695012	0.078125	0.073589534	0.069196429	0.068683565	0.084821429	0.012264922	0.017857143	0.028618152	0.044642857	0.003270646	0.008928571	0.098119379	0.049107143	0.022894522	0.029017857	0.098119379	0.084821429	0.090760425	0.0625	0.045789043	0.046875	0.07686018	0.078125	0.080948487	0.042410714	0.003270646	0.024553571	0.02207686	0.042410714	0.015535568	0.024553571	0.035977105
YJL080C_YKL028W	0	0	10	11	1	0	289220	385401	285552	386849	1222	482	5.67	4.22	134.808	54.741	0.050695012	0.033126294	0.073589534	0.076604555	0.068683565	0.080745342	0.012264922	0.020703934	0.028618152	0.022774327	0.003270646	0.004140787	0.098119379	0.070393375	0.022894522	0.045548654	0.098119379	0.124223602	0.090760425	0.057971014	0.045789043	0.043478261	0.07686018	0.047619048	0.080948487	0.047619048	0.003270646	0.008281573	0.02207686	0.026915114	0.015535568	0.014492754	0.035977105
YJL080C_YKL103C	0	0	10	11	1	1	289220	247326	285552	245782	1222	514	5.67	5.69	134.808	57.092	0.050695012	0.085436893	0.073589534	0.060194175	0.068683565	0.097087379	0.012264922	0.011650485	0.028618152	0.050485437	0.003270646	0.011650485	0.098119379	0.073786408	0.022894522	0.027184466	0.098119379	0.075728155	0.090760425	0.06407767	0.045789043	0.046601942	0.07686018	0.06407767	0.080948487	0.060194175	0.003270646	0.009708738	0.02207686	0.029126214	0.015535568	0.027184466	0.035977105
YJL080C_YDL083C	0	0	10	4	1	1	289220	307789	285552	306926	1222	143	5.67	11.08	134.808	15.847	0.050695012	0.083333333	0.073589534	0.083333333	0.068683565	0.076388889	0.012264922	0.006944444	0.028618152	0.041666667	0.003270646	0	0.098119379	0.118055556	0.022894522	0.041666667	0.098119379	0.041666667	0.090760425	0.076388889	0.045789043	0.041666667	0.07686018	0.097222222	0.080948487	0.055555556	0.003270646	0	0.02207686	0.041666667	0.015535568	0.020833333	0.035977105
YJL080C_YML073C	0	0	10	13	1	1	289220	124172	285552	123227	1222	176	5.67	10.91	134.808	19.961	0.050695012	0.039548023	0.073589534	0.09039548	0.068683565	0.107344633	0.012264922	0.011299435	0.028618152	0.039548023	0.003270646	0.005649718	0.098119379	0.152542373	0.022894522	0.033898305	0.098119379	0.073446328	0.090760425	0.050847458	0.045789043	0.050847458	0.07686018	0.096045198	0.080948487	0.033898305	0.003270646	0	0.02207686	0.028248588	0.015535568	0.011299435	0.035977105
YJL080C_YBL001C	0	0	10	2	1	1	289220	237469	285552	237155	1222	104	5.67	6.67	134.808	11.518	0.050695012	0.076190476	0.073589534	0.047619048	0.068683565	0.057142857	0.012264922	0.028571429	0.028618152	0.019047619	0.003270646	0.00952381	0.098119379	0.085714286	0.022894522	0.028571429	0.098119379	0.057142857	0.090760425	0.066666667	0.045789043	0.038095238	0.07686018	0.085714286	0.080948487	0.104761905	0.003270646	0.019047619	0.02207686	0.019047619	0.015535568	0.047619048	0.035977105
YJL080C_YLR264W	0	0	10	12	1	0	289220	673133	285552	673336	1222	67	5.67	11.42	134.808	7.565	0.050695012	0.073529412	0.073589534	0.029411765	0.068683565	0.088235294	0.012264922	0.029411765	0.028618152	0.014705882	0.003270646	0	0.098119379	0.058823529	0.022894522	0.014705882	0.098119379	0.088235294	0.090760425	0.058823529	0.045789043	0.029411765	0.07686018	0.147058824	0.080948487	0.044117647	0.003270646	0	0.02207686	0	0.015535568	0	0.035977105
YJL080C_YOR061W	0	0	10	15	1	0	289220	441536	285552	442555	1222	339	5.67	8.84	134.808	39.403	0.050695012	0.052941176	0.073589534	0.038235294	0.068683565	0.1	0.012264922	0.023529412	0.028618152	0.041176471	0.003270646	0.014705882	0.098119379	0.091176471	0.022894522	0.032352941	0.098119379	0.058823529	0.090760425	0.047058824	0.045789043	0.05	0.07686018	0.076470588	0.080948487	0.067647059	0.003270646	0.014705882	0.02207686	0.061764706	0.015535568	0.023529412	0.035977105
YJL080C_YIL103W	0	0	10	9	1	0	289220	171748	285552	173025	1222	425	5.67	8.33	134.808	48.31	0.050695012	0.061032864	0.073589534	0.061032864	0.068683565	0.08685446	0.012264922	0.021126761	0.028618152	0.044600939	0.003270646	0.004694836	0.098119379	0.082159624	0.022894522	0.035211268	0.098119379	0.068075117	0.090760425	0.049295775	0.045789043	0.044600939	0.07686018	0.070422535	0.080948487	0.08685446	0.003270646	0.016431925	0.02207686	0.042253521	0.015535568	0.025821596	0.035977105
YJL080C_YHR146W	0	0	10	8	1	0	289220	390303	285552	391700	1222	465	5.67	7.45	134.808	51.115	0.050695012	0.060085837	0.073589534	0.051502146	0.068683565	0.06223176	0.012264922	0.006437768	0.028618152	0.030042918	0.003270646	0.006437768	0.098119379	0.135193133	0.022894522	0.030042918	0.098119379	0.118025751	0.090760425	0.081545064	0.045789043	0.083690987	0.07686018	0.075107296	0.080948487	0.038626609	0.003270646	0.004291845	0.02207686	0.004291845	0.015535568	0.006437768	0.035977105
YJL080C_YEL060C	0	0	10	5	1	1	289220	41953	285552	40046	1222	635	5.67	6.37	134.808	69.621	0.050695012	0.086477987	0.073589534	0.077044025	0.068683565	0.070754717	0.012264922	0.011006289	0.028618152	0.044025157	0.003270646	0.006289308	0.098119379	0.094339623	0.022894522	0.033018868	0.098119379	0.066037736	0.090760425	0.081761006	0.045789043	0.033018868	0.07686018	0.051886792	0.080948487	0.055031447	0.003270646	0.006289308	0.02207686	0.020440252	0.015535568	0.04245283	0.035977105
YJL080C_YJR017C	0	0	10	10	1	1	289220	467025	285552	466513	1222	170	5.67	9.19	134.808	19.405	0.050695012	0.064327485	0.073589534	0.040935673	0.068683565	0.064327485	0.012264922	0.011695906	0.028618152	0.035087719	0.003270646	0.01754386	0.098119379	0.087719298	0.022894522	0.029239766	0.098119379	0.076023392	0.090760425	0.105263158	0.045789043	0.046783626	0.07686018	0.058479532	0.080948487	0.040935673	0.003270646	0.011695906	0.02207686	0.01754386	0.015535568	0.046783626	0.035977105
YJL080C_YNL157W	0	0	10	14	1	0	289220	340354	285552	340860	1222	168	5.67	10.2	134.808	18.051	0.050695012	0.082840237	0.073589534	0.029585799	0.068683565	0.065088757	0.012264922	0.023668639	0.028618152	0.017751479	0.003270646	0	0.098119379	0.088757396	0.022894522	0.023668639	0.098119379	0.035502959	0.090760425	0.165680473	0.045789043	0.071005917	0.07686018	0.017751479	0.080948487	0.065088757	0.003270646	0.00591716	0.02207686	0.035502959	0.015535568	0.01183432	0.035977105
YJL080C_YKL069W	0	0	10	11	1	0	289220	306929	285552	307471	1222	180	5.67	4.78	134.808	19.734	0.050695012	0.082872928	0.073589534	0.060773481	0.068683565	0.08839779	0.012264922	0.011049724	0.028618152	0.038674033	0.003270646	0.016574586	0.098119379	0.071823204	0.022894522	0.038674033	0.098119379	0.066298343	0.090760425	0.082872928	0.045789043	0.022099448	0.07686018	0.077348066	0.080948487	0.071823204	0.003270646	0.033149171	0.02207686	0.033149171	0.015535568	0.033149171	0.035977105
YJL080C_YLR172C	0	0	10	12	1	1	289220	502164	285552	501262	1222	300	5.67	4.66	134.808	33.847	0.050695012	0.059800664	0.073589534	0.073089701	0.068683565	0.106312292	0.012264922	0.019933555	0.028618152	0.029900332	0.003270646	0.013289037	0.098119379	0.059800664	0.022894522	0.033222591	0.098119379	0.096345515	0.090760425	0.073089701	0.045789043	0.03654485	0.07686018	0.059800664	0.080948487	0.066445183	0.003270646	0.016611296	0.02207686	0.046511628	0.015535568	0.019933555	0.035977105
YJL080C_YNL300W	0	0	10	14	1	0	289220	65744	285552	66052	1222	102	5.67	7.52	134.808	10.17	0.050695012	0.058252427	0.073589534	0.155339806	0.068683565	0.038834951	0.012264922	0.038834951	0.028618152	0.029126214	0.003270646	0	0.098119379	0.038834951	0.022894522	0.019417476	0.098119379	0.009708738	0.090760425	0.155339806	0.045789043	0.019417476	0.07686018	0.087378641	0.080948487	0.048543689	0.003270646	0	0.02207686	0.029126214	0.015535568	0.009708738	0.035977105
YJL080C_YMR236W	0	0	10	13	1	0	289220	742970	285552	743443	1222	157	5.67	6.27	134.808	17.315	0.050695012	0.082278481	0.073589534	0.082278481	0.068683565	0.120253165	0.012264922	0.03164557	0.028618152	0.012658228	0.003270646	0.012658228	0.098119379	0.063291139	0.022894522	0.063291139	0.098119379	0.063291139	0.090760425	0.063291139	0.045789043	0.056962025	0.07686018	0.069620253	0.080948487	0.018987342	0.003270646	0.006329114	0.02207686	0.037974684	0.015535568	0.018987342	0.035977105
YJL080C_YNL070W	0	0	10	14	1	0	289220	493367	285552	493549	1222	60	5.67	9.39	134.808	6.87	0.050695012	0.032786885	0.073589534	0.032786885	0.068683565	0.163934426	0.012264922	0.016393443	0.028618152	0.06557377	0.003270646	0.032786885	0.098119379	0.032786885	0.022894522	0	0.098119379	0.032786885	0.090760425	0.131147541	0.045789043	0.081967213	0.07686018	0.049180328	0.080948487	0.06557377	0.003270646	0	0.02207686	0.032786885	0.015535568	0.049180328	0.035977105
YJL080C_YHR049W	0	0	10	8	1	0	289220	206455	285552	207186	1222	243	5.67	6.32	134.808	27.339	0.050695012	0.057377049	0.073589534	0.057377049	0.068683565	0.077868852	0.012264922	0.020491803	0.028618152	0.045081967	0.003270646	0.008196721	0.098119379	0.094262295	0.022894522	0.040983607	0.098119379	0.069672131	0.090760425	0.086065574	0.045789043	0.057377049	0.07686018	0.073770492	0.080948487	0.077868852	0.003270646	0.004098361	0.02207686	0.036885246	0.015535568	0.032786885	0.035977105
YJL080C_YPR086W	0	0	10	16	1	0	289220	710099	285552	711136	1222	345	5.67	8.69	134.808	38.2	0.050695012	0.066473988	0.073589534	0.066473988	0.068683565	0.089595376	0.012264922	0.028901734	0.028618152	0.026011561	0.003270646	0.002890173	0.098119379	0.104046243	0.022894522	0.026011561	0.098119379	0.066473988	0.090760425	0.057803468	0.045789043	0.037572254	0.07686018	0.063583815	0.080948487	0.075144509	0.003270646	0.028901734	0.02207686	0.020231214	0.015535568	0.014450867	0.035977105
YJL080C_YPL049C	0	0	10	16	1	1	289220	463836	285552	462478	1222	452	5.67	9.31	134.808	49.356	0.050695012	0.057395143	0.073589534	0.079470199	0.068683565	0.041942605	0.012264922	0.030905077	0.028618152	0.01986755	0.003270646	0.004415011	0.098119379	0.061810155	0.022894522	0.041942605	0.098119379	0.061810155	0.090760425	0.143487859	0.045789043	0.081677704	0.07686018	0.035320088	0.080948487	0.035320088	0.003270646	0.002207506	0.02207686	0.035320088	0.015535568	0.026490066	0.035977105
YJL080C_YLR091W	0	0	10	12	1	0	289220	322298	285552	323179	1222	293	5.67	10.3	134.808	33.868	0.050695012	0.017006803	0.073589534	0.071428571	0.068683565	0.12585034	0.012264922	0.013605442	0.028618152	0.044217687	0.003270646	0.020408163	0.098119379	0.054421769	0.022894522	0.047619048	0.098119379	0.047619048	0.090760425	0.078231293	0.045789043	0.06122449	0.07686018	0.051020408	0.080948487	0.047619048	0.003270646	0.006802721	0.02207686	0.037414966	0.015535568	0.044217687	0.035977105
YJL080C_YJL166W	0	0	10	10	1	0	289220	106428	285552	106712	1222	94	5.67	10.57	134.808	10.975	0.050695012	0.115789474	0.073589534	0.052631579	0.068683565	0.052631579	0.012264922	0.031578947	0.028618152	0.063157895	0.003270646	0.052631579	0.098119379	0.073684211	0.022894522	0.042105263	0.098119379	0.052631579	0.090760425	0.063157895	0.045789043	0.063157895	0.07686018	0.052631579	0.080948487	0.042105263	0.003270646	0	0.02207686	0.084210526	0.015535568	0.021052632	0.035977105
YJL080C_YNL099C	0	0	10	14	1	1	289220	439285	285552	438569	1222	238	5.67	4.21	134.808	27.205	0.050695012	0.054393305	0.073589534	0.033472803	0.068683565	0.10460251	0.012264922	0.012552301	0.028618152	0.029288703	0.003270646	0.016736402	0.098119379	0.029288703	0.022894522	0.025104603	0.098119379	0.129707113	0.090760425	0.054393305	0.045789043	0.058577406	0.07686018	0.071129707	0.080948487	0.062761506	0.003270646	0.020920502	0.02207686	0.025104603	0.015535568	0.020920502	0.035977105
YJL080C_YIL022W	0	0	10	9	1	0	289220	311163	285552	312458	1222	431	5.67	10.25	134.808	48.854	0.050695012	0.064814815	0.073589534	0.076388889	0.068683565	0.064814815	0.012264922	0.013888889	0.028618152	0.043981481	0.003270646	0.011574074	0.098119379	0.099537037	0.022894522	0.041666667	0.098119379	0.094907407	0.090760425	0.078703704	0.045789043	0.023148148	0.07686018	0.06712963	0.080948487	0.055555556	0.003270646	0.002314815	0.02207686	0.030092593	0.015535568	0.009259259	0.035977105
YJL080C_YGR027C	0	0	10	7	1	1	289220	534462	285552	534136	1222	108	5.67	11.13	134.808	12.039	0.050695012	0.04587156	0.073589534	0.128440367	0.068683565	0.082568807	0.012264922	0.018348624	0.028618152	0	0.003270646	0.009174312	0.098119379	0.165137615	0.022894522	0.04587156	0.098119379	0.04587156	0.090760425	0.091743119	0.045789043	0.036697248	0.07686018	0.055045872	0.080948487	0.073394495	0.003270646	0	0.02207686	0.036697248	0.015535568	0.027522936	0.035977105
YJL080C_YHR066W	0	0	10	8	1	0	289220	229337	285552	230698	1222	453	5.67	10.05	134.808	51.764	0.050695012	0.04185022	0.073589534	0.046255507	0.068683565	0.085903084	0.012264922	0.024229075	0.028618152	0.028634361	0.003270646	0	0.098119379	0.121145374	0.022894522	0.04845815	0.098119379	0.0969163	0.090760425	0.081497797	0.045789043	0.044052863	0.07686018	0.066079295	0.080948487	0.050660793	0.003270646	0.004405286	0.02207686	0.011013216	0.015535568	0.026431718	0.035977105
YJL080C_YIL121W	0	0	10	9	1	0	289220	132241	285552	133869	1222	542	5.67	9.64	134.808	59.617	0.050695012	0.071823204	0.073589534	0.092081031	0.068683565	0.127071823	0.012264922	0.016574586	0.028618152	0.064456722	0.003270646	0.011049724	0.098119379	0.049723757	0.022894522	0.025782689	0.098119379	0.040515654	0.090760425	0.075506446	0.045789043	0.036832413	0.07686018	0.066298343	0.080948487	0.073664825	0.003270646	0.027624309	0.02207686	0.036832413	0.015535568	0.009208103	0.035977105
YJL080C_YER004W	0	0	10	5	1	0	289220	159579	285552	160274	1222	231	5.67	10.03	134.808	25.086	0.050695012	0.099137931	0.073589534	0.094827586	0.068683565	0.112068966	0.012264922	0.017241379	0.028618152	0.038793103	0.003270646	0.004310345	0.098119379	0.068965517	0.022894522	0.043103448	0.098119379	0.047413793	0.090760425	0.060344828	0.045789043	0.034482759	0.07686018	0.068965517	0.080948487	0.056034483	0.003270646	0.00862069	0.02207686	0.025862069	0.015535568	0.021551724	0.035977105
YJL080C_YNL078W	0	0	10	14	1	0	289220	479769	285552	480992	1222	407	5.67	10.74	134.808	45.908	0.050695012	0.026960784	0.073589534	0.039215686	0.068683565	0.080882353	0.012264922	0.024509804	0.028618152	0.031862745	0.003270646	0.004901961	0.098119379	0.056372549	0.022894522	0.044117647	0.098119379	0.039215686	0.090760425	0.149509804	0.045789043	0.066176471	0.07686018	0.034313725	0.080948487	0.053921569	0.003270646	0.004901961	0.02207686	0.029411765	0.015535568	0.029411765	0.035977105
YJL080C_YDR381W	0	0	10	4	1	0	289220	1236551	285552	1237997	1222	226	5.67	11.9	134.808	24.955	0.050695012	0.092511013	0.073589534	0.088105727	0.068683565	0.066079295	0.012264922	0.022026432	0.028618152	0.022026432	0.003270646	0	0.098119379	0.0969163	0.022894522	0.039647577	0.098119379	0.04845815	0.090760425	0.061674009	0.045789043	0.066079295	0.07686018	0.070484581	0.080948487	0.035242291	0.003270646	0	0.02207686	0.008810573	0.015535568	0	0.035977105
YJL080C_YGR167W	0	0	10	7	1	0	289220	832461	285552	833162	1222	233	5.67	4.15	134.808	26.531	0.050695012	0.047008547	0.073589534	0.081196581	0.068683565	0.064102564	0.012264922	0.004273504	0.028618152	0.051282051	0.003270646	0.008547009	0.098119379	0.098290598	0.022894522	0.055555556	0.098119379	0.11965812	0.090760425	0.05982906	0.045789043	0.025641026	0.07686018	0.025641026	0.080948487	0.051282051	0.003270646	0	0.02207686	0.008547009	0.015535568	0.008547009	0.035977105
YJL080C_YDL173W	0	0	10	4	1	0	289220	148192	285552	149079	1222	295	5.67	10.3	134.808	31.886	0.050695012	0.091216216	0.073589534	0.064189189	0.068683565	0.040540541	0.012264922	0.016891892	0.028618152	0.037162162	0.003270646	0	0.098119379	0.101351351	0.022894522	0.023648649	0.098119379	0.047297297	0.090760425	0.097972973	0.045789043	0.043918919	0.07686018	0.043918919	0.080948487	0.064189189	0.003270646	0	0.02207686	0.010135135	0.015535568	0.02027027	0.035977105
YJL080C_YNL044W	0	0	10	14	1	0	289220	545269	285552	545878	1222	176	5.67	8.64	134.808	19.412	0.050695012	0.06779661	0.073589534	0.056497175	0.068683565	0.13559322	0.012264922	0.016949153	0.028618152	0.079096045	0.003270646	0.005649718	0.098119379	0.056497175	0.022894522	0.050847458	0.098119379	0.056497175	0.090760425	0.09039548	0.045789043	0.033898305	0.07686018	0.09039548	0.080948487	0.06779661	0.003270646	0.011299435	0.02207686	0.028248588	0.015535568	0.005649718	0.035977105
YJL080C_YPR138C	0	0	10	16	1	1	289220	812449	285552	810980	1222	489	5.67	6.49	134.808	53.689	0.050695012	0.097959184	0.073589534	0.097959184	0.068683565	0.097959184	0.012264922	0.028571429	0.028618152	0.053061224	0.003270646	0.034693878	0.098119379	0.036734694	0.022894522	0.020408163	0.098119379	0.034693878	0.090760425	0.073469388	0.045789043	0.02244898	0.07686018	0.069387755	0.080948487	0.067346939	0.003270646	0.02244898	0.02207686	0.048979592	0.015535568	0.020408163	0.035977105
YJL080C_YOR174W	0	0	10	15	1	0	289220	658748	285552	659602	1222	284	5.67	4.36	134.808	32.205	0.050695012	0.031578947	0.073589534	0.059649123	0.068683565	0.105263158	0.012264922	0.021052632	0.028618152	0.038596491	0.003270646	0.003508772	0.098119379	0.094736842	0.022894522	0.031578947	0.098119379	0.115789474	0.090760425	0.073684211	0.045789043	0.042105263	0.07686018	0.049122807	0.080948487	0.045614035	0.003270646	0.007017544	0.02207686	0.01754386	0.015535568	0.010526316	0.035977105
YJL080C_YPR067W	0	0	10	16	1	0	289220	682217	285552	682774	1222	185	5.67	7.79	134.808	20.876	0.050695012	0.048387097	0.073589534	0.02688172	0.068683565	0.112903226	0.012264922	0.005376344	0.028618152	0.053763441	0.003270646	0	0.098119379	0.080645161	0.022894522	0.016129032	0.098119379	0.053763441	0.090760425	0.107526882	0.045789043	0.043010753	0.07686018	0.02688172	0.080948487	0.086021505	0.003270646	0.021505376	0.02207686	0.02688172	0.015535568	0.010752688	0.035977105
YJL080C_YNL168C	0	0	10	14	1	1	289220	318811	285552	318032	1222	259	5.67	8.85	134.808	28.792	0.050695012	0.065384615	0.073589534	0.046153846	0.068683565	0.092307692	0.012264922	0.023076923	0.028618152	0.042307692	0.003270646	0.003846154	0.098119379	0.073076923	0.022894522	0.026923077	0.098119379	0.057692308	0.090760425	0.080769231	0.045789043	0.065384615	0.07686018	0.057692308	0.080948487	0.076923077	0.003270646	0.015384615	0.02207686	0.023076923	0.015535568	0.030769231	0.035977105
YJL080C_YJL122W	0	0	10	10	1	0	289220	189714	285552	190241	1222	175	5.67	10.82	134.808	19.287	0.050695012	0.051136364	0.073589534	0.073863636	0.068683565	0.107954545	0.012264922	0.011363636	0.028618152	0.017045455	0.003270646	0.005681818	0.098119379	0.130681818	0.022894522	0.039772727	0.098119379	0.056818182	0.090760425	0.119318182	0.045789043	0.034090909	0.07686018	0.045454545	0.080948487	0.045454545	0.003270646	0	0.02207686	0.011363636	0.015535568	0.017045455	0.035977105
YJL080C_YJL096W	0	0	10	10	1	0	289220	246485	285552	246970	1222	161	5.67	11.53	134.808	18.387	0.050695012	0.037037037	0.073589534	0.049382716	0.068683565	0.104938272	0.012264922	0.018518519	0.028618152	0.037037037	0.003270646	0.00617284	0.098119379	0.092592593	0.022894522	0.018518519	0.098119379	0.030864198	0.090760425	0.074074074	0.045789043	0.049382716	0.07686018	0.061728395	0.080948487	0.067901235	0.003270646	0	0.02207686	0.030864198	0.015535568	0.024691358	0.035977105
YJL080C_YER163C	0	0	10	5	1	1	289220	503777	285552	503079	1222	232	5.67	6.14	134.808	26.293	0.050695012	0.064377682	0.073589534	0.068669528	0.068683565	0.08583691	0.012264922	0.012875536	0.028618152	0.017167382	0.003270646	0.008583691	0.098119379	0.034334764	0.022894522	0.034334764	0.098119379	0.090128755	0.090760425	0.051502146	0.045789043	0.060085837	0.07686018	0.072961373	0.080948487	0.068669528	0.003270646	0	0.02207686	0.060085837	0.015535568	0.0472103	0.035977105
YJL080C_YAL039C	0	0	10	1	1	1	289220	69526	285552	68717	1222	269	5.67	5.26	134.808	30.081	0.050695012	0.074074074	0.073589534	0.048148148	0.068683565	0.062962963	0.012264922	0.051851852	0.028618152	0.040740741	0.003270646	0.025925926	0.098119379	0.051851852	0.022894522	0.044444444	0.098119379	0.066666667	0.090760425	0.107407407	0.045789043	0.092592593	0.07686018	0.062962963	0.080948487	0.025925926	0.003270646	0.014814815	0.02207686	0.014814815	0.015535568	0.02962963	0.035977105
YJL080C_YLR387C	0	0	10	12	1	1	289220	897672	285552	896374	1222	432	5.67	7.64	134.808	49.689	0.050695012	0.048498845	0.073589534	0.043879908	0.068683565	0.073903002	0.012264922	0.020785219	0.028618152	0.034642032	0.003270646	0.002309469	0.098119379	0.080831409	0.022894522	0.050808314	0.098119379	0.085450346	0.090760425	0.080831409	0.045789043	0.034642032	0.07686018	0.041570439	0.080948487	0.060046189	0.003270646	0.020785219	0.02207686	0.03926097	0.015535568	0.025404157	0.035977105
YJL080C_YNL111C	0	0	10	14	1	1	289220	417304	285552	416942	1222	120	5.67	4.18	134.808	13.297	0.050695012	0.090909091	0.073589534	0.041322314	0.068683565	0.090909091	0.012264922	0.024793388	0.028618152	0.024793388	0.003270646	0.008264463	0.098119379	0.05785124	0.022894522	0.033057851	0.098119379	0.090909091	0.090760425	0.082644628	0.045789043	0.024793388	0.07686018	0.099173554	0.080948487	0.074380165	0.003270646	0	0.02207686	0.049586777	0.015535568	0.024793388	0.035977105
YJL080C_YEL006W	0	0	10	5	1	0	289220	144326	285552	145333	1222	335	5.67	10.55	134.808	36.96	0.050695012	0.06547619	0.073589534	0.089285714	0.068683565	0.104166667	0.012264922	0.026785714	0.028618152	0.056547619	0.003270646	0.00297619	0.098119379	0.06547619	0.022894522	0.044642857	0.098119379	0.023809524	0.090760425	0.077380952	0.045789043	0.041666667	0.07686018	0.0625	0.080948487	0.056547619	0.003270646	0.005952381	0.02207686	0.050595238	0.015535568	0.017857143	0.035977105
YJL080C_YOL126C	0	0	10	15	1	1	289220	82920	285552	81787	1222	377	5.67	6.89	134.808	40.73	0.050695012	0.074074074	0.073589534	0.063492063	0.068683565	0.100529101	0.012264922	0.023809524	0.028618152	0.023809524	0.003270646	0	0.098119379	0.044973545	0.022894522	0.042328042	0.098119379	0.037037037	0.090760425	0.097883598	0.045789043	0.052910053	0.07686018	0.08994709	0.080948487	0.087301587	0.003270646	0.013227513	0.02207686	0.026455026	0.015535568	0.029100529	0.035977105
YJL080C_YNL158W	0	0	10	14	1	0	289220	339614	285552	340210	1222	198	5.67	6.63	134.808	22.383	0.050695012	0.025125628	0.073589534	0.055276382	0.068683565	0.105527638	0.012264922	0.020100503	0.028618152	0.045226131	0.003270646	0.010050251	0.098119379	0.030150754	0.022894522	0.040201005	0.098119379	0.040201005	0.090760425	0.075376884	0.045789043	0.055276382	0.07686018	0.090452261	0.080948487	0.105527638	0.003270646	0.005025126	0.02207686	0.035175879	0.015535568	0.035175879	0.035977105
YJL080C_YBR082C	0	0	10	2	1	1	289220	407163	285552	406622	1222	148	5.67	6.5	134.808	16.456	0.050695012	0.040268456	0.073589534	0.080536913	0.068683565	0.087248322	0.012264922	0.013422819	0.028618152	0.033557047	0.003270646	0.020134228	0.098119379	0.073825503	0.022894522	0.013422819	0.098119379	0.033557047	0.090760425	0.093959732	0.045789043	0.100671141	0.07686018	0.033557047	0.080948487	0.073825503	0.003270646	0.020134228	0.02207686	0.046979866	0.015535568	0.026845638	0.035977105
YJL080C_YHR110W	0	0	10	8	1	0	289220	332285	285552	332923	1222	212	5.67	6.78	134.808	24.248	0.050695012	0.056338028	0.073589534	0.051643192	0.068683565	0.107981221	0.012264922	0.014084507	0.028618152	0.070422535	0.003270646	0.004694836	0.098119379	0.079812207	0.022894522	0.042253521	0.098119379	0.079812207	0.090760425	0.070422535	0.045789043	0.009389671	0.07686018	0.0657277	0.080948487	0.051643192	0.003270646	0.018779343	0.02207686	0.028169014	0.015535568	0.028169014	0.035977105
YJL080C_YBR101C	0	0	10	2	1	1	289220	444687	285552	443815	1222	290	5.67	4.76	134.808	32.604	0.050695012	0.041237113	0.073589534	0.068728522	0.068683565	0.144329897	0.012264922	0.027491409	0.028618152	0.030927835	0.003270646	0.006872852	0.098119379	0.082474227	0.022894522	0.030927835	0.098119379	0.075601375	0.090760425	0.068728522	0.045789043	0.034364261	0.07686018	0.048109966	0.080948487	0.075601375	0.003270646	0.006872852	0.02207686	0.020618557	0.015535568	0.013745704	0.035977105
YJL080C_YHR169W	0	0	10	8	1	0	289220	442182	285552	443477	1222	431	5.67	10.4	134.808	47.878	0.050695012	0.053240741	0.073589534	0.090277778	0.068683565	0.090277778	0.012264922	0.030092593	0.028618152	0.030092593	0.003270646	0.00462963	0.098119379	0.074074074	0.022894522	0.053240741	0.098119379	0.053240741	0.090760425	0.064814815	0.045789043	0.041666667	0.07686018	0.064814815	0.080948487	0.076388889	0.003270646	0.009259259	0.02207686	0.016203704	0.015535568	0.020833333	0.035977105
YJL080C_YPL037C	0	0	10	16	1	1	289220	481898	285552	481425	1222	157	5.67	6.53	134.808	17.02	0.050695012	0.063291139	0.073589534	0.132911392	0.068683565	0.088607595	0.012264922	0.018987342	0.028618152	0.037974684	0.003270646	0	0.098119379	0.113924051	0.022894522	0.082278481	0.098119379	0.069620253	0.090760425	0.044303797	0.045789043	0.037974684	0.07686018	0.063291139	0.080948487	0.037974684	0.003270646	0	0.02207686	0.006329114	0.015535568	0.025316456	0.035977105
YJL080C_YOL129W	0	0	10	15	1	0	289220	77560	285552	78114	1222	184	5.67	5.12	134.808	20.101	0.050695012	0.102702703	0.073589534	0.064864865	0.068683565	0.140540541	0.012264922	0.016216216	0.028618152	0.07027027	0.003270646	0.021621622	0.098119379	0.027027027	0.022894522	0.016216216	0.098119379	0.021621622	0.090760425	0.091891892	0.045789043	0.021621622	0.07686018	0.091891892	0.080948487	0.064864865	0.003270646	0.016216216	0.02207686	0.043243243	0.015535568	0.010810811	0.035977105
YJL080C_YKL112W	0	0	10	11	1	0	289220	226214	285552	228409	1222	731	5.67	4.74	134.808	81.752	0.050695012	0.046448087	0.073589534	0.045081967	0.068683565	0.06284153	0.012264922	0.015027322	0.028618152	0.019125683	0.003270646	0.00273224	0.098119379	0.06557377	0.022894522	0.031420765	0.098119379	0.06147541	0.090760425	0.096994536	0.045789043	0.032786885	0.07686018	0.054644809	0.080948487	0.047814208	0.003270646	0.004098361	0.02207686	0.024590164	0.015535568	0.053278689	0.035977105
YJL080C_YBR173C	0	0	10	2	1	1	289220	582167	285552	581721	1222	148	5.67	4.87	134.808	16.76	0.050695012	0.053691275	0.073589534	0.026845638	0.068683565	0.080536913	0.012264922	0.040268456	0.028618152	0.020134228	0.003270646	0.013422819	0.098119379	0.046979866	0.022894522	0.087248322	0.098119379	0.067114094	0.090760425	0.087248322	0.045789043	0.053691275	0.07686018	0.060402685	0.080948487	0.060402685	0.003270646	0.006711409	0.02207686	0.013422819	0.015535568	0.020134228	0.035977105
YJL080C_YDR510W	0	0	10	4	1	0	289220	1469393	285552	1469698	1222	101	5.67	4.76	134.808	11.597	0.050695012	0.049019608	0.073589534	0.058823529	0.068683565	0.058823529	0.012264922	0.039215686	0.028618152	0.039215686	0.003270646	0	0.098119379	0.088235294	0.022894522	0.049019608	0.098119379	0.117647059	0.090760425	0.058823529	0.045789043	0.049019608	0.07686018	0.039215686	0.080948487	0.078431373	0.003270646	0	0.02207686	0.019607843	0.015535568	0.019607843	0.035977105
YJL080C_YMR062C	0	0	10	13	1	1	289220	396378	285552	395053	1222	441	5.67	7.1	134.808	47.848	0.050695012	0.07239819	0.073589534	0.076923077	0.068683565	0.092760181	0.012264922	0.027149321	0.028618152	0.040723982	0.003270646	0.00678733	0.098119379	0.07918552	0.022894522	0.033936652	0.098119379	0.045248869	0.090760425	0.07918552	0.045789043	0.022624434	0.07686018	0.074660633	0.080948487	0.06561086	0.003270646	0.015837104	0.02207686	0.018099548	0.015535568	0.004524887	0.035977105
YJL080C_YDL012C	0	0	10	4	1	1	289220	431515	285552	431106	1222	107	5.67	4.7	134.808	12.175	0.050695012	0.055555556	0.073589534	0.074074074	0.068683565	0.055555556	0.012264922	0.018518519	0.028618152	0.009259259	0.003270646	0	0.098119379	0.009259259	0.022894522	0.25	0.098119379	0.018518519	0.090760425	0.101851852	0.045789043	0.111111111	0.07686018	0.009259259	0.080948487	0.009259259	0.003270646	0.046296296	0.02207686	0.12037037	0.015535568	0.009259259	0.035977105
YJL080C_YIL093C	0	0	10	9	1	1	289220	188781	285552	187987	1222	264	5.67	6.21	134.808	30.513	0.050695012	0.049056604	0.073589534	0.056603774	0.068683565	0.083018868	0.012264922	0.026415094	0.028618152	0.026415094	0.003270646	0.018867925	0.098119379	0.071698113	0.022894522	0.049056604	0.098119379	0.105660377	0.090760425	0.064150943	0.045789043	0.049056604	0.07686018	0.067924528	0.080948487	0.041509434	0.003270646	0	0.02207686	0.045283019	0.015535568	0.026415094	0.035977105
YJL080C_YEL037C	0	0	10	5	1	1	289220	82603	285552	81407	1222	398	5.67	4.07	134.808	42.366	0.050695012	0.07518797	0.073589534	0.120300752	0.068683565	0.072681704	0.012264922	0.025062657	0.028618152	0.027568922	0.003270646	0	0.098119379	0.037593985	0.022894522	0.062656642	0.098119379	0.115288221	0.090760425	0.072681704	0.045789043	0.060150376	0.07686018	0.060150376	0.080948487	0.037593985	0.003270646	0.010025063	0.02207686	0.015037594	0.015535568	0.005012531	0.035977105
YJL080C_YOR286W	0	0	10	15	1	0	289220	850279	285552	850728	1222	149	5.67	10.46	134.808	16.697	0.050695012	0.06	0.073589534	0.073333333	0.068683565	0.08	0.012264922	0.013333333	0.028618152	0.046666667	0.003270646	0.006666667	0.098119379	0.12	0.022894522	0.013333333	0.098119379	0.066666667	0.090760425	0.046666667	0.045789043	0.08	0.07686018	0.073333333	0.080948487	0.046666667	0.003270646	0.006666667	0.02207686	0.033333333	0.015535568	0.026666667	0.035977105
YJL080C_YLR138W	0	0	10	12	1	0	289220	418438	285552	421395	1222	985	5.67	5.26	134.808	109.368	0.050695012	0.079107505	0.073589534	0.063894523	0.068683565	0.093306288	0.012264922	0.023326572	0.028618152	0.038539554	0.003270646	0.015212982	0.098119379	0.057809331	0.022894522	0.021298174	0.098119379	0.0831643	0.090760425	0.087221095	0.045789043	0.043610548	0.07686018	0.055780933	0.080948487	0.069979716	0.003270646	0.012170385	0.02207686	0.022312373	0.015535568	0.014198783	0.035977105
YJL080C_YPL273W	0	0	10	16	1	0	289220	25087	285552	26064	1222	325	5.67	4.98	134.808	36.668	0.050695012	0.064417178	0.073589534	0.049079755	0.068683565	0.088957055	0.012264922	0.015337423	0.028618152	0.04601227	0.003270646	0.018404908	0.098119379	0.064417178	0.022894522	0.030674847	0.098119379	0.070552147	0.090760425	0.079754601	0.045789043	0.049079755	0.07686018	0.04601227	0.080948487	0.088957055	0.003270646	0.018404908	0.02207686	0.036809816	0.015535568	0.015337423	0.035977105
YJL080C_YMR202W	0	0	10	13	1	0	289220	667536	285552	668204	1222	222	5.67	5.83	134.808	24.895	0.050695012	0.085201794	0.073589534	0.076233184	0.068683565	0.121076233	0.012264922	0.040358744	0.028618152	0.058295964	0.003270646	0.013452915	0.098119379	0.044843049	0.022894522	0.02690583	0.098119379	0.049327354	0.090760425	0.044843049	0.045789043	0.035874439	0.07686018	0.053811659	0.080948487	0.049327354	0.003270646	0.00896861	0.02207686	0.062780269	0.015535568	0.035874439	0.035977105
YJL080C_YPL199C	0	0	10	16	1	1	289220	172754	285552	172032	1222	240	5.67	6.79	134.808	26.758	0.050695012	0.074688797	0.073589534	0.074688797	0.068683565	0.078838174	0.012264922	0.01659751	0.028618152	0.029045643	0.003270646	0	0.098119379	0.074688797	0.022894522	0.091286307	0.098119379	0.066390041	0.090760425	0.062240664	0.045789043	0.033195021	0.07686018	0.053941909	0.080948487	0.045643154	0.003270646	0.012448133	0.02207686	0.037344398	0.015535568	0.037344398	0.035977105
YJL080C_YNL036W	0	0	10	14	1	0	289220	559815	285552	560480	1222	221	5.67	6.99	134.808	24.859	0.050695012	0.045045045	0.073589534	0.04954955	0.068683565	0.103603604	0.012264922	0.013513514	0.028618152	0.027027027	0.003270646	0.009009009	0.098119379	0.063063063	0.022894522	0.054054054	0.098119379	0.054054054	0.090760425	0.072072072	0.045789043	0.031531532	0.07686018	0.058558559	0.080948487	0.063063063	0.003270646	0.040540541	0.02207686	0.036036036	0.015535568	0.045045045	0.035977105
YJL080C_YDR035W	0	0	10	4	1	0	289220	521814	285552	522926	1222	370	5.67	7.35	134.808	41.07	0.050695012	0.088948787	0.073589534	0.061994609	0.068683565	0.094339623	0.012264922	0.021563342	0.028618152	0.032345013	0.003270646	0.008086253	0.098119379	0.088948787	0.022894522	0.032345013	0.098119379	0.067385445	0.090760425	0.059299191	0.045789043	0.037735849	0.07686018	0.040431267	0.080948487	0.078167116	0.003270646	0.021563342	0.02207686	0.018867925	0.015535568	0.018867925	0.035977105
YJL080C_YKR025W	0	0	10	11	1	0	289220	487413	285552	488261	1222	282	5.67	4.22	134.808	32.142	0.050695012	0.035335689	0.073589534	0.081272085	0.068683565	0.056537102	0.012264922	0.014134276	0.028618152	0.035335689	0.003270646	0.010600707	0.098119379	0.070671378	0.022894522	0.049469965	0.098119379	0.137809187	0.090760425	0.053003534	0.045789043	0.042402827	0.07686018	0.081272085	0.080948487	0.049469965	0.003270646	0	0.02207686	0.024734982	0.015535568	0.014134276	0.035977105
YJL080C_YGL038C	0	0	10	7	1	1	289220	426810	285552	425368	1222	480	5.67	7.85	134.808	55.155	0.050695012	0.035343035	0.073589534	0.03950104	0.068683565	0.091476091	0.012264922	0.024948025	0.028618152	0.045738046	0.003270646	0.022869023	0.098119379	0.079002079	0.022894522	0.043659044	0.098119379	0.037422037	0.090760425	0.106029106	0.045789043	0.062370062	0.07686018	0.045738046	0.080948487	0.072765073	0.003270646	0.002079002	0.02207686	0.037422037	0.015535568	0.022869023	0.035977105
YJL080C_YLL043W	0	0	10	12	1	0	289220	49937	285552	51946	1222	669	5.67	6.9	134.808	73.877	0.050695012	0.073134328	0.073589534	0.076119403	0.068683565	0.06119403	0.012264922	0.032835821	0.028618152	0.047761194	0.003270646	0.014925373	0.098119379	0.043283582	0.022894522	0.037313433	0.098119379	0.041791045	0.090760425	0.102985075	0.045789043	0.050746269	0.07686018	0.058208955	0.080948487	0.043283582	0.003270646	0.008955224	0.02207686	0.037313433	0.015535568	0.026865672	0.035977105
YJL080C_YNL066W	0	0	10	14	1	0	289220	501516	285552	502778	1222	420	5.67	4.02	134.808	43.442	0.050695012	0.097387173	0.073589534	0.083135392	0.068683565	0.049881235	0.012264922	0.007125891	0.028618152	0.016627078	0.003270646	0.016627078	0.098119379	0.03087886	0.022894522	0.03087886	0.098119379	0.042755344	0.090760425	0.16152019	0.045789043	0.038004751	0.07686018	0.076009501	0.080948487	0.040380048	0.003270646	0.026128266	0.02207686	0.049881235	0.015535568	0.007125891	0.035977105
YJL080C_YHR003C	0	0	10	8	1	1	289220	111312	285552	110023	1222	429	5.67	6.77	134.808	48.883	0.050695012	0.046511628	0.073589534	0.060465116	0.068683565	0.093023256	0.012264922	0.027906977	0.028618152	0.030232558	0.003270646	0.01627907	0.098119379	0.081395349	0.022894522	0.020930233	0.098119379	0.093023256	0.090760425	0.081395349	0.045789043	0.030232558	0.07686018	0.060465116	0.080948487	0.08372093	0.003270646	0.020930233	0.02207686	0.027906977	0.015535568	0.020930233	0.035977105
YJL080C_YBR265W	0	0	10	2	1	0	289220	738577	285552	739539	1222	320	5.67	6.26	134.808	35.986	0.050695012	0.065420561	0.073589534	0.07788162	0.068683565	0.112149533	0.012264922	0.018691589	0.028618152	0.049844237	0.003270646	0.012461059	0.098119379	0.062305296	0.022894522	0.040498442	0.098119379	0.07165109	0.090760425	0.052959502	0.045789043	0.037383178	0.07686018	0.056074766	0.080948487	0.068535826	0.003270646	0.031152648	0.02207686	0.037383178	0.015535568	0.018691589	0.035977105
YJL080C_YOR008C	0	0	10	15	1	1	289220	342415	285552	341279	1222	378	5.67	4.52	134.808	39.27	0.050695012	0.068601583	0.073589534	0.071240106	0.068683565	0.042216359	0.012264922	0.013192612	0.028618152	0.026385224	0.003270646	0.002638522	0.098119379	0.034300792	0.022894522	0.031662269	0.098119379	0.050131926	0.090760425	0.229551451	0.045789043	0.026385224	0.07686018	0.044854881	0.080948487	0.042216359	0.003270646	0.023746702	0.02207686	0.036939314	0.015535568	0.018469657	0.035977105
YJL080C_YLR426W	0	0	10	12	1	0	289220	987059	285552	988110	1222	326	5.67	9.17	134.808	36.676	0.050695012	0.04587156	0.073589534	0.076452599	0.068683565	0.134556575	0.012264922	0.012232416	0.028618152	0.048929664	0.003270646	0.009174312	0.098119379	0.042813456	0.022894522	0.039755352	0.098119379	0.036697248	0.090760425	0.070336391	0.045789043	0.039755352	0.07686018	0.064220183	0.080948487	0.088685015	0.003270646	0.033639144	0.02207686	0.033639144	0.015535568	0.009174312	0.035977105
YJL080C_YOR234C	0	0	10	15	1	1	289220	779406	285552	778556	1222	107	5.67	11.76	134.808	12.168	0.050695012	0.074074074	0.073589534	0.074074074	0.068683565	0.055555556	0.012264922	0.018518519	0.028618152	0.037037037	0.003270646	0.009259259	0.098119379	0.083333333	0.022894522	0.027777778	0.098119379	0.037037037	0.090760425	0.083333333	0.045789043	0.037037037	0.07686018	0.101851852	0.080948487	0.055555556	0.003270646	0	0.02207686	0.055555556	0.015535568	0.027777778	0.035977105
YJL080C_YEL044W	0	0	10	5	1	0	289220	69757	285552	70257	1222	166	5.67	11.05	134.808	18.533	0.050695012	0.05988024	0.073589534	0.083832335	0.068683565	0.071856287	0.012264922	0.011976048	0.028618152	0.035928144	0.003270646	0	0.098119379	0.089820359	0.022894522	0.017964072	0.098119379	0.047904192	0.090760425	0.107784431	0.045789043	0.053892216	0.07686018	0.047904192	0.080948487	0.041916168	0.003270646	0.005988024	0.02207686	0.041916168	0.015535568	0.017964072	0.035977105
YJL080C_YER023W	0	0	10	5	1	0	289220	201075	285552	201935	1222	286	5.67	5.29	134.808	30.132	0.050695012	0.090592334	0.073589534	0.097560976	0.068683565	0.097560976	0.012264922	0.031358885	0.028618152	0.013937282	0.003270646	0.003484321	0.098119379	0.076655052	0.022894522	0.038327526	0.098119379	0.080139373	0.090760425	0.080139373	0.045789043	0.041811847	0.07686018	0.104529617	0.080948487	0.045296167	0.003270646	0.024390244	0.02207686	0.031358885	0.015535568	0.013937282	0.035977105
YJL080C_YKL009W	0	0	10	11	1	0	289220	425885	285552	426595	1222	236	5.67	9.05	134.808	27.058	0.050695012	0.050632911	0.073589534	0.046413502	0.068683565	0.084388186	0.012264922	0.021097046	0.028618152	0.029535865	0.003270646	0.008438819	0.098119379	0.097046414	0.022894522	0.029535865	0.098119379	0.092827004	0.090760425	0.071729958	0.045789043	0.042194093	0.07686018	0.075949367	0.080948487	0.05907173	0.003270646	0.008438819	0.02207686	0.046413502	0.015535568	0.008438819	0.035977105
YJL080C_YKL106W	0	0	10	11	1	0	289220	237180	285552	238535	1222	451	5.67	9.52	134.808	51.795	0.050695012	0.059734513	0.073589534	0.044247788	0.068683565	0.103982301	0.012264922	0.022123894	0.028618152	0.053097345	0.003270646	0.019911504	0.098119379	0.075221239	0.022894522	0.053097345	0.098119379	0.039823009	0.090760425	0.07079646	0.045789043	0.048672566	0.07686018	0.064159292	0.080948487	0.053097345	0.003270646	0.017699115	0.02207686	0.048672566	0.015535568	0.019911504	0.035977105
YJL080C_YLR126C	0	0	10	12	1	1	289220	395521	285552	394766	1222	251	5.67	5.02	134.808	28.825	0.050695012	0.067460317	0.073589534	0.047619048	0.068683565	0.095238095	0.012264922	0.015873016	0.028618152	0.055555556	0.003270646	0.01984127	0.098119379	0.071428571	0.022894522	0.071428571	0.098119379	0.087301587	0.090760425	0.063492063	0.045789043	0.027777778	0.07686018	0.067460317	0.080948487	0.051587302	0.003270646	0.01984127	0.02207686	0.035714286	0.015535568	0.015873016	0.035977105
YJL080C_YKL073W	0	0	10	11	1	0	289220	296074	285552	298719	1222	881	5.67	5.04	134.808	99.571	0.050695012	0.046485261	0.073589534	0.052154195	0.068683565	0.10430839	0.012264922	0.017006803	0.028618152	0.046485261	0.003270646	0.002267574	0.098119379	0.077097506	0.022894522	0.03968254	0.098119379	0.095238095	0.090760425	0.087301587	0.045789043	0.032879819	0.07686018	0.056689342	0.080948487	0.071428571	0.003270646	0.003401361	0.02207686	0.023809524	0.015535568	0.015873016	0.035977105
YJL080C_YNL003C	0	0	10	14	1	1	289220	625831	285552	624977	1222	284	5.67	10.47	134.808	31.027	0.050695012	0.094736842	0.073589534	0.084210526	0.068683565	0.087719298	0.012264922	0.028070175	0.028618152	0.052631579	0.003270646	0.01754386	0.098119379	0.056140351	0.022894522	0.035087719	0.098119379	0.038596491	0.090760425	0.098245614	0.045789043	0.038596491	0.07686018	0.049122807	0.080948487	0.070175439	0.003270646	0.014035088	0.02207686	0.038596491	0.015535568	0.010526316	0.035977105
YJL080C_YKL096W	0	0	10	11	1	0	289220	260776	285552	261495	1222	239	5.67	4.32	134.808	24.268	0.050695012	0.083333333	0.073589534	0.129166667	0.068683565	0.054166667	0.012264922	0.0125	0.028618152	0.041666667	0.003270646	0	0.098119379	0.058333333	0.022894522	0.025	0.098119379	0.045833333	0.090760425	0.216666667	0.045789043	0.016666667	0.07686018	0.058333333	0.080948487	0.045833333	0.003270646	0	0.02207686	0.033333333	0.015535568	0.008333333	0.035977105
YJL080C_YHR086W	0	0	10	8	1	0	289220	278155	285552	279726	1222	523	5.67	8.45	134.808	56.972	0.050695012	0.080152672	0.073589534	0.057251908	0.068683565	0.082061069	0.012264922	0.032442748	0.028618152	0.04389313	0.003270646	0.009541985	0.098119379	0.032442748	0.022894522	0.070610687	0.098119379	0.02480916	0.090760425	0.125954198	0.045789043	0.041984733	0.07686018	0.059160305	0.080948487	0.032442748	0.003270646	0.011450382	0.02207686	0.036259542	0.015535568	0.011450382	0.035977105
YJL080C_YBR126C	0	0	10	2	1	1	289220	490386	285552	488899	1222	495	5.67	6.02	134.808	56.147	0.050695012	0.0625	0.073589534	0.046370968	0.068683565	0.092741935	0.012264922	0.016129032	0.028618152	0.048387097	0.003270646	0.02016129	0.098119379	0.064516129	0.022894522	0.036290323	0.098119379	0.070564516	0.090760425	0.078629032	0.045789043	0.038306452	0.07686018	0.090725806	0.080948487	0.060483871	0.003270646	0.008064516	0.02207686	0.04233871	0.015535568	0.030241935	0.035977105
YJL080C_YNL090W	0	0	10	14	1	0	289220	456567	285552	457145	1222	192	5.67	5.24	134.808	21.479	0.050695012	0.062176166	0.073589534	0.093264249	0.068683565	0.088082902	0.012264922	0.020725389	0.028618152	0.041450777	0.003270646	0.010362694	0.098119379	0.077720207	0.022894522	0.020725389	0.098119379	0.082901554	0.090760425	0.041450777	0.045789043	0.03626943	0.07686018	0.077720207	0.080948487	0.062176166	0.003270646	0.031088083	0.02207686	0.03626943	0.015535568	0.010362694	0.035977105
YJL080C_YGR046W	0	0	10	7	1	0	289220	584899	285552	586056	1222	385	5.67	10.45	134.808	44.199	0.050695012	0.067357513	0.073589534	0.044041451	0.068683565	0.090673575	0.012264922	0.020725389	0.028618152	0.059585492	0.003270646	0.007772021	0.098119379	0.095854922	0.022894522	0.041450777	0.098119379	0.046632124	0.090760425	0.080310881	0.045789043	0.033678756	0.07686018	0.046632124	0.080948487	0.067357513	0.003270646	0.005181347	0.02207686	0.056994819	0.015535568	0.023316062	0.035977105
YJL080C_YGR024C	0	0	10	7	1	1	289220	532600	285552	531887	1222	237	5.67	8.21	134.808	27.757	0.050695012	0.042016807	0.073589534	0.046218487	0.068683565	0.096638655	0.012264922	0.012605042	0.028618152	0.084033613	0.003270646	0.012605042	0.098119379	0.096638655	0.022894522	0.029411765	0.098119379	0.071428571	0.090760425	0.058823529	0.045789043	0.033613445	0.07686018	0.042016807	0.080948487	0.071428571	0.003270646	0.025210084	0.02207686	0.054621849	0.015535568	0.021008403	0.035977105
YJL080C_YCR067C	0	0	10	3	1	1	289220	236318	285552	233121	1222	1065	5.67	4.45	134.808	114.078	0.050695012	0.033771107	0.073589534	0.063789869	0.068683565	0.072232645	0.012264922	0.015009381	0.028618152	0.041275797	0.003270646	0.001876173	0.098119379	0.042213884	0.022894522	0.019699812	0.098119379	0.066604128	0.090760425	0.182926829	0.045789043	0.045966229	0.07686018	0.074108818	0.080948487	0.071294559	0.003270646	0.001876173	0.02207686	0.01782364	0.015535568	0.015947467	0.035977105
YJL080C_YDR354W	0	0	10	4	1	0	289220	1184741	285552	1185883	1222	380	5.67	6.65	134.808	41.374	0.050695012	0.076115486	0.073589534	0.065616798	0.068683565	0.128608924	0.012264922	0.015748031	0.028618152	0.034120735	0.003270646	0.010498688	0.098119379	0.073490814	0.022894522	0.018372703	0.098119379	0.057742782	0.090760425	0.099737533	0.045789043	0.049868766	0.07686018	0.065616798	0.080948487	0.057742782	0.003270646	0.01312336	0.02207686	0.028871391	0.015535568	0.044619423	0.035977105
YJL080C_YBL002W	0	0	10	2	1	0	289220	236495	285552	236890	1222	131	5.67	10.89	134.808	14.237	0.050695012	0.03030303	0.073589534	0.128787879	0.068683565	0.045454545	0.012264922	0.015151515	0.028618152	0.015151515	0.003270646	0	0.098119379	0.143939394	0.022894522	0.03030303	0.098119379	0.060606061	0.090760425	0.143939394	0.045789043	0.037878788	0.07686018	0.053030303	0.080948487	0.060606061	0.003270646	0	0.02207686	0.037878788	0.015535568	0.015151515	0.035977105
YJL080C_YER055C	0	0	10	5	1	1	289220	265784	285552	264891	1222	297	5.67	5.99	134.808	32.266	0.050695012	0.067114094	0.073589534	0.073825503	0.068683565	0.100671141	0.012264922	0.020134228	0.028618152	0.033557047	0.003270646	0.003355705	0.098119379	0.073825503	0.022894522	0.023489933	0.098119379	0.060402685	0.090760425	0.080536913	0.045789043	0.036912752	0.07686018	0.100671141	0.080948487	0.077181208	0.003270646	0.016778523	0.02207686	0.016778523	0.015535568	0.006711409	0.035977105
YJL080C_YPR028W	0	0	10	16	1	0	289220	623524	285552	624199	1222	180	5.67	9.87	134.808	20.269	0.050695012	0.055248619	0.073589534	0.077348066	0.068683565	0.127071823	0.012264922	0.016574586	0.028618152	0.060773481	0.003270646	0.016574586	0.098119379	0.060773481	0.022894522	0.038674033	0.098119379	0.038674033	0.090760425	0.08839779	0.045789043	0.033149171	0.07686018	0.066298343	0.080948487	0.082872928	0.003270646	0	0.02207686	0.060773481	0.015535568	0.011049724	0.035977105
YJL080C_YKR074W	0	0	10	11	1	0	289220	578851	285552	579318	1222	155	5.67	6.37	134.808	18.436	0.050695012	0.019230769	0.073589534	0.025641026	0.068683565	0.08974359	0.012264922	0.012820513	0.028618152	0.064102564	0.003270646	0.012820513	0.098119379	0.108974359	0.022894522	0.006410256	0.098119379	0.076923077	0.090760425	0.051282051	0.045789043	0.032051282	0.07686018	0.051282051	0.080948487	0.064102564	0.003270646	0	0.02207686	0.038461538	0.015535568	0.032051282	0.035977105
YJL080C_YDL061C	0	0	10	4	1	1	289220	340798	285552	340628	1222	56	5.67	10.8	134.808	6.728	0.050695012	0.070175439	0.073589534	0.035087719	0.068683565	0.035087719	0.012264922	0.01754386	0.028618152	0.070175439	0.003270646	0.01754386	0.098119379	0.070175439	0.022894522	0.035087719	0.098119379	0.035087719	0.090760425	0.070175439	0.045789043	0.01754386	0.07686018	0.052631579	0.080948487	0.035087719	0.003270646	0.070175439	0.02207686	0.035087719	0.015535568	0.070175439	0.035977105
YJL080C_YBL033C	0	0	10	2	1	1	289220	159696	285552	158659	1222	345	5.67	6.3	134.808	38.332	0.050695012	0.089595376	0.073589534	0.063583815	0.068683565	0.101156069	0.012264922	0.01734104	0.028618152	0.01734104	0.003270646	0.00867052	0.098119379	0.046242775	0.022894522	0.040462428	0.098119379	0.063583815	0.090760425	0.060693642	0.045789043	0.037572254	0.07686018	0.043352601	0.080948487	0.057803468	0.003270646	0.020231214	0.02207686	0.028901734	0.015535568	0.031791908	0.035977105
YJL080C_YDR174W	0	0	10	4	1	0	289220	812108	285552	812848	1222	246	5.67	9.29	134.808	27.544	0.050695012	0.028340081	0.073589534	0.08097166	0.068683565	0.076923077	0.012264922	0.004048583	0.028618152	0.024291498	0.003270646	0.008097166	0.098119379	0.137651822	0.022894522	0.032388664	0.098119379	0.093117409	0.090760425	0.101214575	0.045789043	0.068825911	0.07686018	0.048582996	0.080948487	0.048582996	0.003270646	0	0.02207686	0.024291498	0.015535568	0.020242915	0.035977105
YJL080C_YGL115W	0	0	10	7	1	0	289220	292036	285552	293004	1222	322	5.67	5.52	134.808	36.401	0.050695012	0.046439628	0.073589534	0.030959752	0.068683565	0.13003096	0.012264922	0.021671827	0.028618152	0.034055728	0.003270646	0.003095975	0.098119379	0.058823529	0.022894522	0.043343653	0.098119379	0.046439628	0.090760425	0.083591331	0.045789043	0.030959752	0.07686018	0.089783282	0.080948487	0.083591331	0.003270646	0.012383901	0.02207686	0.034055728	0.015535568	0.012383901	0.035977105
YJL080C_YHR087W	0	0	10	8	1	0	289220	280822	285552	281157	1222	111	5.67	4.86	134.808	12.009	0.050695012	0.107142857	0.073589534	0.071428571	0.068683565	0.080357143	0.012264922	0.008928571	0.028618152	0.044642857	0.003270646	0	0.098119379	0.107142857	0.022894522	0.017857143	0.098119379	0.116071429	0.090760425	0.071428571	0.045789043	0.026785714	0.07686018	0.071428571	0.080948487	0.044642857	0.003270646	0	0.02207686	0.035714286	0.015535568	0	0.035977105
YJL080C_YNL264C	0	0	10	14	1	1	289220	146616	285552	145564	1222	350	5.67	7.21	134.808	40.677	0.050695012	0.045584046	0.073589534	0.062678063	0.068683565	0.102564103	0.012264922	0.028490028	0.028618152	0.048433048	0.003270646	0.01994302	0.098119379	0.094017094	0.022894522	0.028490028	0.098119379	0.065527066	0.090760425	0.028490028	0.045789043	0.065527066	0.07686018	0.056980057	0.080948487	0.048433048	0.003270646	0.011396011	0.02207686	0.03988604	0.015535568	0.022792023	0.035977105
YJL080C_YDR493W	0	0	10	4	1	0	289220	1436210	285552	1436581	1222	123	5.67	10.67	134.808	13.927	0.050695012	0.040322581	0.073589534	0.096774194	0.068683565	0.096774194	0.012264922	0.024193548	0.028618152	0.024193548	0.003270646	0	0.098119379	0.096774194	0.022894522	0.032258065	0.098119379	0.048387097	0.090760425	0.040322581	0.045789043	0.048387097	0.07686018	0.048387097	0.080948487	0.032258065	0.003270646	0.016129032	0.02207686	0.016129032	0.015535568	0.032258065	0.035977105
YJL080C_YIL010W	0	0	10	9	1	0	289220	334879	285552	335526	1222	215	5.67	10.13	134.808	24.119	0.050695012	0.046296296	0.073589534	0.064814815	0.068683565	0.083333333	0.012264922	0.009259259	0.028618152	0.046296296	0.003270646	0	0.098119379	0.115740741	0.022894522	0.032407407	0.098119379	0.087962963	0.090760425	0.092592593	0.045789043	0.055555556	0.07686018	0.074074074	0.080948487	0.055555556	0.003270646	0.009259259	0.02207686	0.018518519	0.015535568	0.013888889	0.035977105
YJL080C_YNL067W	0	0	10	14	1	0	289220	499682	285552	500257	1222	191	5.67	10.47	134.808	21.657	0.050695012	0.0625	0.073589534	0.036458333	0.068683565	0.046875	0.012264922	0.020833333	0.028618152	0.036458333	0.003270646	0	0.098119379	0.104166667	0.022894522	0.036458333	0.098119379	0.046875	0.090760425	0.041666667	0.045789043	0.020833333	0.07686018	0.140625	0.080948487	0.09375	0.003270646	0.005208333	0.02207686	0.03125	0.015535568	0.026041667	0.035977105
YJL080C_YBR106W	0	0	10	2	1	0	289220	452652	285552	453218	1222	188	5.67	10	134.808	21.137	0.050695012	0.074074074	0.073589534	0.063492063	0.068683565	0.063492063	0.012264922	0.084656085	0.028618152	0.026455026	0.003270646	0.005291005	0.098119379	0.084656085	0.022894522	0.031746032	0.098119379	0.058201058	0.090760425	0.068783069	0.045789043	0.047619048	0.07686018	0.047619048	0.080948487	0.100529101	0.003270646	0.005291005	0.02207686	0.042328042	0.015535568	0.015873016	0.035977105
YJL080C_YDR298C	0	0	10	4	1	1	289220	1058811	285552	1058173	1222	212	5.67	10.37	134.808	22.814	0.050695012	0.061032864	0.073589534	0.098591549	0.068683565	0.131455399	0.012264922	0.004694836	0.028618152	0.037558685	0.003270646	0	0.098119379	0.107981221	0.022894522	0.023474178	0.098119379	0.051643192	0.090760425	0.093896714	0.045789043	0.037558685	0.07686018	0.084507042	0.080948487	0.046948357	0.003270646	0.004694836	0.02207686	0.014084507	0.015535568	0.014084507	0.035977105
YJL080C_YKR052C	0	0	10	11	1	1	289220	533106	285552	532192	1222	304	5.67	8	134.808	33.307	0.050695012	0.062295082	0.073589534	0.124590164	0.068683565	0.081967213	0.012264922	0.042622951	0.028618152	0.049180328	0.003270646	0.016393443	0.098119379	0.049180328	0.022894522	0.039344262	0.098119379	0.045901639	0.090760425	0.072131148	0.045789043	0.045901639	0.07686018	0.039344262	0.080948487	0.075409836	0.003270646	0.019672131	0.02207686	0.032786885	0.015535568	0.026229508	0.035977105
YJL080C_YPR098C	0	0	10	16	1	1	289220	729526	285552	728945	1222	161	5.67	10.47	134.808	17.731	0.050695012	0.067901235	0.073589534	0.086419753	0.068683565	0.148148148	0.012264922	0.018518519	0.028618152	0.074074074	0.003270646	0.012345679	0.098119379	0.086419753	0.022894522	0.030864198	0.098119379	0.030864198	0.090760425	0.086419753	0.045789043	0.043209877	0.07686018	0.067901235	0.080948487	0.043209877	0.003270646	0.018518519	0.02207686	0.037037037	0.015535568	0.018518519	0.035977105
YJL080C_YLR090W	0	0	10	12	1	0	289220	320702	285552	322081	1222	459	5.67	6.14	134.808	51.346	0.050695012	0.07826087	0.073589534	0.05	0.068683565	0.073913043	0.012264922	0.008695652	0.028618152	0.05	0.003270646	0.008695652	0.098119379	0.095652174	0.022894522	0.02173913	0.098119379	0.067391304	0.090760425	0.069565217	0.045789043	0.041304348	0.07686018	0.045652174	0.080948487	0.058695652	0.003270646	0.02826087	0.02207686	0.02826087	0.015535568	0.032608696	0.035977105
YJL080C_YFR001W	0	0	10	6	1	0	289220	149105	285552	149719	1222	204	5.67	11.1	134.808	23.59	0.050695012	0.034146341	0.073589534	0.07804878	0.068683565	0.07804878	0.012264922	0.009756098	0.028618152	0.014634146	0.003270646	0	0.098119379	0.2	0.022894522	0.03902439	0.098119379	0.092682927	0.090760425	0.063414634	0.045789043	0.034146341	0.07686018	0.043902439	0.080948487	0.053658537	0.003270646	0	0.02207686	0.014634146	0.015535568	0.004878049	0.035977105
YJL080C_YDL047W	0	0	10	4	1	0	289220	369769	285552	370704	1222	311	5.67	5.17	134.808	35.537	0.050695012	0.070512821	0.073589534	0.051282051	0.068683565	0.092948718	0.012264922	0.025641026	0.028618152	0.051282051	0.003270646	0.019230769	0.098119379	0.048076923	0.022894522	0.041666667	0.098119379	0.073717949	0.090760425	0.048076923	0.045789043	0.041666667	0.07686018	0.083333333	0.080948487	0.048076923	0.003270646	0.032051282	0.02207686	0.044871795	0.015535568	0.028846154	0.035977105
YJL080C_YBL040C	0	0	10	2	1	1	289220	142871	285552	142115	1222	219	5.67	10.62	134.808	25.762	0.050695012	0.045454545	0.073589534	0.05	0.068683565	0.15	0.012264922	0.031818182	0.028618152	0.081818182	0.003270646	0.022727273	0.098119379	0.068181818	0.022894522	0.022727273	0.098119379	0.022727273	0.090760425	0.068181818	0.045789043	0.018181818	0.07686018	0.045454545	0.080948487	0.095454545	0.003270646	0	0.02207686	0.068181818	0.015535568	0.036363636	0.035977105
YJL080C_YML028W	0	0	10	13	1	0	289220	220138	285552	220728	1222	196	5.67	4.87	134.808	21.59	0.050695012	0.065989848	0.073589534	0.096446701	0.068683565	0.086294416	0.012264922	0.005076142	0.028618152	0.055837563	0.003270646	0.015228426	0.098119379	0.07106599	0.022894522	0.030456853	0.098119379	0.076142132	0.090760425	0.040609137	0.045789043	0.055837563	0.07686018	0.091370558	0.080948487	0.065989848	0.003270646	0.010152284	0.02207686	0.025380711	0.015535568	0.010152284	0.035977105
YJL080C_YDR041W	0	0	10	4	1	0	289220	539801	285552	540412	1222	203	5.67	10.1	134.808	23.424	0.050695012	0.044117647	0.073589534	0.053921569	0.068683565	0.117647059	0.012264922	0.019607843	0.028618152	0.039215686	0.003270646	0.009803922	0.098119379	0.078431373	0.022894522	0.029411765	0.098119379	0.053921569	0.090760425	0.073529412	0.045789043	0.053921569	0.07686018	0.049019608	0.080948487	0.058823529	0.003270646	0.004901961	0.02207686	0.049019608	0.015535568	0.024509804	0.035977105
YJL080C_YER011W	0	0	10	5	1	0	289220	175247	285552	176011	1222	254	5.67	4.49	134.808	24.906	0.050695012	0.043137255	0.073589534	0.207843137	0.068683565	0.062745098	0.012264922	0.02745098	0.028618152	0.015686275	0.003270646	0.003921569	0.098119379	0.047058824	0.022894522	0.031372549	0.098119379	0.043137255	0.090760425	0.247058824	0.045789043	0.047058824	0.07686018	0.039215686	0.080948487	0.039215686	0.003270646	0	0.02207686	0.019607843	0.015535568	0.003921569	0.035977105
YJL080C_YDR337W	0	0	10	4	1	0	289220	1146314	285552	1147174	1222	286	5.67	10.72	134.808	33.057	0.050695012	0.034843206	0.073589534	0.090592334	0.068683565	0.083623693	0.012264922	0.031358885	0.028618152	0.041811847	0.003270646	0.003484321	0.098119379	0.101045296	0.022894522	0.041811847	0.098119379	0.080139373	0.090760425	0.055749129	0.045789043	0.024390244	0.07686018	0.052264808	0.080948487	0.073170732	0.003270646	0.006968641	0.02207686	0.020905923	0.015535568	0.006968641	0.035977105
YJL080C_YML125C	0	0	10	13	1	1	289220	21700	285552	20762	1222	312	5.67	5.31	134.808	35.287	0.050695012	0.07028754	0.073589534	0.047923323	0.068683565	0.10543131	0.012264922	0.019169329	0.028618152	0.028753994	0.003270646	0.012779553	0.098119379	0.060702875	0.022894522	0.022364217	0.098119379	0.063897764	0.090760425	0.07028754	0.045789043	0.047923323	0.07686018	0.079872204	0.080948487	0.073482428	0.003270646	0.003194888	0.02207686	0.063897764	0.015535568	0.022364217	0.035977105
YJL080C_YKL214C	0	0	10	11	1	1	289220	31694	285552	31083	1222	203	5.67	10.2	134.808	23.777	0.050695012	0.049019608	0.073589534	0.049019608	0.068683565	0.053921569	0.012264922	0.019607843	0.028618152	0.029411765	0.003270646	0	0.098119379	0.088235294	0.022894522	0.024509804	0.098119379	0.093137255	0.090760425	0.073529412	0.045789043	0.058823529	0.07686018	0.034313725	0.080948487	0.058823529	0.003270646	0.004901961	0.02207686	0.039215686	0.015535568	0.039215686	0.035977105
YJL080C_YOR226C	0	0	10	15	1	1	289220	762085	285552	761615	1222	156	5.67	10.34	134.808	16.93	0.050695012	0.063694268	0.073589534	0.101910828	0.068683565	0.076433121	0.012264922	0.031847134	0.028618152	0.025477707	0.003270646	0	0.098119379	0.101910828	0.022894522	0.012738854	0.098119379	0.038216561	0.090760425	0.076433121	0.045789043	0.050955414	0.07686018	0.070063694	0.080948487	0.076433121	0.003270646	0.01910828	0.02207686	0.025477707	0.015535568	0.038216561	0.035977105
YJL080C_YNL156C	0	0	10	14	1	1	289220	341970	285552	341071	1222	299	5.67	7.01	134.808	33.666	0.050695012	0.07	0.073589534	0.033333333	0.068683565	0.133333333	0.012264922	0.02	0.028618152	0.046666667	0.003270646	0.016666667	0.098119379	0.036666667	0.022894522	0.03	0.098119379	0.036666667	0.090760425	0.123333333	0.045789043	0.03	0.07686018	0.056666667	0.080948487	0.073333333	0.003270646	0.023333333	0.02207686	0.043333333	0.015535568	0.033333333	0.035977105
YJL080C_YKL085W	0	0	10	11	1	0	289220	278767	285552	279771	1222	334	5.67	8.99	134.808	35.65	0.050695012	0.08358209	0.073589534	0.089552239	0.068683565	0.089552239	0.012264922	0.017910448	0.028618152	0.03880597	0.003270646	0	0.098119379	0.080597015	0.022894522	0.017910448	0.098119379	0.059701493	0.090760425	0.074626866	0.045789043	0.056716418	0.07686018	0.086567164	0.080948487	0.068656716	0.003270646	0.002985075	0.02207686	0.008955224	0.015535568	0.023880597	0.035977105
YJL080C_YKL167C	0	0	10	11	1	1	289220	134139	285552	133726	1222	137	5.67	10.15	134.808	16.021	0.050695012	0.036231884	0.073589534	0.02173913	0.068683565	0.094202899	0.012264922	0.043478261	0.028618152	0.036231884	0.003270646	0.007246377	0.098119379	0.101449275	0.022894522	0.050724638	0.098119379	0.065217391	0.090760425	0.050724638	0.045789043	0.057971014	0.07686018	0.065217391	0.080948487	0.086956522	0.003270646	0.007246377	0.02207686	0.02173913	0.015535568	0.043478261	0.035977105
YJL080C_YLR390W	0	0	10	12	1	0	289220	903066	285552	903404	1222	112	5.67	9.33	134.808	12.515	0.050695012	0.044247788	0.073589534	0.026548673	0.068683565	0.079646018	0.012264922	0.026548673	0.028618152	0.026548673	0.003270646	0.008849558	0.098119379	0.07079646	0.022894522	0.03539823	0.098119379	0.026548673	0.090760425	0.053097345	0.045789043	0.115044248	0.07686018	0.07079646	0.080948487	0.061946903	0.003270646	0.017699115	0.02207686	0.017699115	0.015535568	0.017699115	0.035977105
YJL080C_YGL166W	0	0	10	7	1	0	289220	191135	285552	191812	1222	225	5.67	7.69	134.808	24.425	0.050695012	0.075221239	0.073589534	0.061946903	0.068683565	0.075221239	0.012264922	0.022123894	0.028618152	0.008849558	0.003270646	0	0.098119379	0.057522124	0.022894522	0.026548673	0.098119379	0.057522124	0.090760425	0.101769912	0.045789043	0.053097345	0.07686018	0.039823009	0.080948487	0.048672566	0.003270646	0.053097345	0.02207686	0.013274336	0.015535568	0.03539823	0.035977105
YJL080C_YJL011C	0	0	10	10	1	1	289220	414763	285552	414278	1222	161	5.67	5.5	134.808	18.61	0.050695012	0.030864198	0.073589534	0.067901235	0.068683565	0.104938272	0.012264922	0.030864198	0.028618152	0.043209877	0.003270646	0.00617284	0.098119379	0.111111111	0.022894522	0.037037037	0.098119379	0.12345679	0.090760425	0.086419753	0.045789043	0.018518519	0.07686018	0.043209877	0.080948487	0.055555556	0.003270646	0.00617284	0.02207686	0.030864198	0.015535568	0.018518519	0.035977105
YJL080C_YER001W	0	0	10	5	1	0	289220	153519	285552	155807	1222	762	5.67	7.23	134.808	88.529	0.050695012	0.044560944	0.073589534	0.056356488	0.068683565	0.086500655	0.012264922	0.014416776	0.028618152	0.061598952	0.003270646	0.017038008	0.098119379	0.085190039	0.022894522	0.0327654	0.098119379	0.068152031	0.090760425	0.060288336	0.045789043	0.03931848	0.07686018	0.051114024	0.080948487	0.055045872	0.003270646	0.01310616	0.02207686	0.044560944	0.015535568	0.031454784	0.035977105
YJL080C_YGL231C	0	0	10	7	1	1	289220	63620	285552	63048	1222	190	5.67	10.45	134.808	21.46	0.050695012	0.057591623	0.073589534	0.068062827	0.068683565	0.083769634	0.012264922	0.052356021	0.028618152	0.036649215	0.003270646	0.02617801	0.098119379	0.068062827	0.022894522	0.089005236	0.098119379	0.031413613	0.090760425	0.089005236	0.045789043	0.057591623	0.07686018	0.036649215	0.080948487	0.078534031	0.003270646	0	0.02207686	0.041884817	0.015535568	0.010471204	0.035977105
YJL080C_YOL140W	0	0	10	15	1	0	289220	58759	285552	60030	1222	423	5.67	7.55	134.808	46.681	0.050695012	0.075471698	0.073589534	0.08490566	0.068683565	0.087264151	0.012264922	0.014150943	0.028618152	0.044811321	0.003270646	0.004716981	0.098119379	0.087264151	0.022894522	0.030660377	0.098119379	0.077830189	0.090760425	0.058962264	0.045789043	0.035377358	0.07686018	0.066037736	0.080948487	0.070754717	0.003270646	0.014150943	0.02207686	0.028301887	0.015535568	0.028301887	0.035977105
YJL080C_YKR070W	0	0	10	11	1	0	289220	573216	285552	574274	1222	352	5.67	9.35	134.808	39.406	0.050695012	0.073654391	0.073589534	0.059490085	0.068683565	0.099150142	0.012264922	0.011331445	0.028618152	0.050991501	0.003270646	0.011331445	0.098119379	0.076487252	0.022894522	0.036827195	0.098119379	0.036827195	0.090760425	0.067988669	0.045789043	0.050991501	0.07686018	0.065155807	0.080948487	0.067988669	0.003270646	0.005665722	0.02207686	0.039660057	0.015535568	0.016997167	0.035977105
YJL080C_YMR242C	0	0	10	13	1	1	289220	754219	285552	753224	1222	172	5.67	11.12	134.808	20.437	0.050695012	0.023121387	0.073589534	0.069364162	0.068683565	0.052023121	0.012264922	0.023121387	0.028618152	0.057803468	0.003270646	0.011560694	0.098119379	0.10982659	0.022894522	0.040462428	0.098119379	0.057803468	0.090760425	0.069364162	0.045789043	0.040462428	0.07686018	0.086705202	0.080948487	0.057803468	0.003270646	0	0.02207686	0.052023121	0.015535568	0.040462428	0.035977105
YJL080C_YKL186C	0	0	10	11	1	1	289220	93303	285552	92749	1222	184	5.67	7.93	134.808	20.783	0.050695012	0.054054054	0.073589534	0.059459459	0.068683565	0.064864865	0.012264922	0.037837838	0.028618152	0.059459459	0.003270646	0.010810811	0.098119379	0.043243243	0.022894522	0.07027027	0.098119379	0.010810811	0.090760425	0.037837838	0.045789043	0.059459459	0.07686018	0.059459459	0.080948487	0.07027027	0.003270646	0.016216216	0.02207686	0.021621622	0.015535568	0.016216216	0.035977105
YJL080C_YBR016W	0	0	10	2	1	0	289220	270247	285552	270633	1222	128	5.67	7.25	134.808	14.617	0.050695012	0.108527132	0.073589534	0.054263566	0.068683565	0.031007752	0.012264922	0.023255814	0.028618152	0.007751938	0.003270646	0	0.098119379	0.015503876	0.022894522	0.255813953	0.098119379	0.023255814	0.090760425	0.046511628	0.045789043	0.07751938	0.07686018	0.015503876	0.080948487	0.007751938	0.003270646	0.03875969	0.02207686	0.11627907	0.015535568	0.023255814	0.035977105
YJL080C_YLR351C	0	0	10	12	1	1	289220	830363	285552	829488	1222	291	5.67	7.59	134.808	32.549	0.050695012	0.051369863	0.073589534	0.071917808	0.068683565	0.075342466	0.012264922	0.023972603	0.028618152	0.047945205	0.003270646	0.003424658	0.098119379	0.071917808	0.022894522	0.034246575	0.098119379	0.061643836	0.090760425	0.089041096	0.045789043	0.058219178	0.07686018	0.071917808	0.080948487	0.071917808	0.003270646	0.010273973	0.02207686	0.037671233	0.015535568	0.02739726	0.035977105
YJL080C_YHR200W	0	0	10	8	1	0	289220	499079	285552	499885	1222	268	5.67	4.56	134.808	29.747	0.050695012	0.066914498	0.073589534	0.074349442	0.068683565	0.089219331	0.012264922	0.026022305	0.028618152	0.044609665	0.003270646	0	0.098119379	0.033457249	0.022894522	0.089219331	0.098119379	0.092936803	0.090760425	0.07063197	0.045789043	0.044609665	0.07686018	0.05204461	0.080948487	0.063197026	0.003270646	0.003717472	0.02207686	0.007434944	0.015535568	0.022304833	0.035977105
YJL080C_YLR200W	0	0	10	12	1	0	289220	549014	285552	549358	1222	114	5.67	4.51	134.808	13.284	0.050695012	0.034782609	0.073589534	0.043478261	0.068683565	0.113043478	0.012264922	0.017391304	0.028618152	0.026086957	0.003270646	0	0.098119379	0.07826087	0.022894522	0.07826087	0.098119379	0.173913043	0.090760425	0.034782609	0.045789043	0.026086957	0.07686018	0.052173913	0.080948487	0.052173913	0.003270646	0.008695652	0.02207686	0.017391304	0.015535568	0	0.035977105
YJL080C_YHR144C	0	0	10	8	1	1	289220	388729	285552	387791	1222	312	5.67	7.79	134.808	35.646	0.050695012	0.047923323	0.073589534	0.047923323	0.068683565	0.102236422	0.012264922	0.025559105	0.028618152	0.041533546	0.003270646	0.003194888	0.098119379	0.057507987	0.022894522	0.038338658	0.098119379	0.07028754	0.090760425	0.060702875	0.045789043	0.031948882	0.07686018	0.063897764	0.080948487	0.063897764	0.003270646	0.044728435	0.02207686	0.025559105	0.015535568	0.028753994	0.035977105
YJL080C_YGL011C	0	0	10	7	1	1	289220	475252	285552	474494	1222	252	5.67	6.17	134.808	28.001	0.050695012	0.055335968	0.073589534	0.110671937	0.068683565	0.059288538	0.012264922	0.023715415	0.028618152	0.039525692	0.003270646	0.003952569	0.098119379	0.071146245	0.022894522	0.031620553	0.098119379	0.071146245	0.090760425	0.055335968	0.045789043	0.039525692	0.07686018	0.071146245	0.080948487	0.071146245	0.003270646	0.011857708	0.02207686	0.051383399	0.015535568	0.015810277	0.035977105
YJL080C_YJL026W	0	0	10	10	1	0	289220	392398	285552	393597	1222	399	5.67	5.01	134.808	46.147	0.050695012	0.035	0.073589534	0.0875	0.068683565	0.09	0.012264922	0.0275	0.028618152	0.075	0.003270646	0.015	0.098119379	0.0875	0.022894522	0.0225	0.098119379	0.1125	0.090760425	0.0625	0.045789043	0.03	0.07686018	0.0475	0.080948487	0.06	0.003270646	0.005	0.02207686	0.0275	0.015535568	0.025	0.035977105
YJL080C_YGR108W	0	0	10	7	1	0	289220	703640	285552	705055	1222	471	5.67	5.77	134.808	54.87	0.050695012	0.036016949	0.073589534	0.036016949	0.068683565	0.101694915	0.012264922	0.027542373	0.028618152	0.046610169	0.003270646	0.01059322	0.098119379	0.084745763	0.022894522	0.040254237	0.098119379	0.084745763	0.090760425	0.082627119	0.045789043	0.023305085	0.07686018	0.042372881	0.080948487	0.082627119	0.003270646	0.016949153	0.02207686	0.038135593	0.015535568	0.021186441	0.035977105
YJL080C_YPL081W	0	0	10	16	1	0	289220	404947	285552	406041	1222	197	5.67	10.8	134.808	22.443	0.050695012	0.050505051	0.073589534	0.106060606	0.068683565	0.101010101	0.012264922	0.01010101	0.028618152	0.035353535	0.003270646	0	0.098119379	0.090909091	0.022894522	0.025252525	0.098119379	0.080808081	0.090760425	0.060606061	0.045789043	0.045454545	0.07686018	0.060606061	0.080948487	0.045454545	0.003270646	0	0.02207686	0.03030303	0.015535568	0.02020202	0.035977105
YJL080C_YGR267C	0	0	10	7	1	1	289220	1025741	285552	1025010	1222	243	5.67	7.23	134.808	27.769	0.050695012	0.06147541	0.073589534	0.053278689	0.068683565	0.090163934	0.012264922	0.040983607	0.028618152	0.028688525	0.003270646	0.004098361	0.098119379	0.053278689	0.022894522	0.040983607	0.098119379	0.098360656	0.090760425	0.053278689	0.045789043	0.040983607	0.07686018	0.069672131	0.080948487	0.077868852	0.003270646	0.012295082	0.02207686	0.028688525	0.015535568	0.032786885	0.035977105
YJL080C_YDR397C	0	0	10	4	1	1	289220	1266891	285552	1266359	1222	146	5.67	4.72	134.808	16.65	0.050695012	0.027210884	0.073589534	0.054421769	0.068683565	0.095238095	0.012264922	0.040816327	0.028618152	0.047619048	0.003270646	0	0.098119379	0.088435374	0.022894522	0.040816327	0.098119379	0.129251701	0.090760425	0.12244898	0.045789043	0.027210884	0.07686018	0.040816327	0.080948487	0.081632653	0.003270646	0	0.02207686	0.006802721	0.015535568	0.020408163	0.035977105
YJL080C_YBR010W	0	0	10	2	1	0	289220	256329	285552	256739	1222	136	5.67	12	134.808	15.356	0.050695012	0.051094891	0.073589534	0.116788321	0.068683565	0.094890511	0.012264922	0.00729927	0.028618152	0.03649635	0.003270646	0	0.098119379	0.116788321	0.022894522	0.058394161	0.098119379	0.051094891	0.090760425	0.072992701	0.045789043	0.03649635	0.07686018	0.04379562	0.080948487	0.051094891	0.003270646	0	0.02207686	0.01459854	0.015535568	0.01459854	0.035977105
YJL080C_YMR260C	0	0	10	13	1	1	289220	789838	285552	789377	1222	153	5.67	4.53	134.808	17.435	0.050695012	0.11038961	0.073589534	0.038961039	0.068683565	0.058441558	0.012264922	0.025974026	0.028618152	0.038961039	0.003270646	0.006493506	0.098119379	0.103896104	0.022894522	0.038961039	0.098119379	0.116883117	0.090760425	0.025974026	0.045789043	0.012987013	0.07686018	0.038961039	0.080948487	0.051948052	0.003270646	0.012987013	0.02207686	0.019480519	0.015535568	0.012987013	0.035977105
YJL080C_YKL113C	0	0	10	11	1	1	289220	225519	285552	224371	1222	382	5.67	9.51	134.808	43.279	0.050695012	0.065274151	0.073589534	0.065274151	0.068683565	0.096605744	0.012264922	0.026109661	0.028618152	0.033942559	0.003270646	0.007832898	0.098119379	0.114882507	0.022894522	0.033942559	0.098119379	0.096605744	0.090760425	0.057441253	0.045789043	0.039164491	0.07686018	0.046997389	0.080948487	0.070496084	0.003270646	0.018276762	0.02207686	0.023498695	0.015535568	0.018276762	0.035977105
YJL080C_YDL123W	0	0	10	4	1	0	289220	241418	285552	241840	1222	140	5.67	6.45	134.808	15.673	0.050695012	0.042553191	0.073589534	0.056737589	0.068683565	0.106382979	0.012264922	0.014184397	0.028618152	0.04964539	0.003270646	0.007092199	0.098119379	0.007092199	0.022894522	0.063829787	0.098119379	0.028368794	0.090760425	0.092198582	0.045789043	0.113475177	0.07686018	0.085106383	0.080948487	0.028368794	0.003270646	0.042553191	0.02207686	0.070921986	0.015535568	0.014184397	0.035977105
YJL080C_YLR258W	0	0	10	12	1	0	289220	660718	285552	662835	1222	705	5.67	6.32	134.808	80.078	0.050695012	0.065155807	0.073589534	0.073654391	0.068683565	0.099150142	0.012264922	0.019830028	0.028618152	0.050991501	0.003270646	0.011331445	0.098119379	0.052407932	0.022894522	0.028328612	0.098119379	0.062322946	0.090760425	0.049575071	0.045789043	0.043909348	0.07686018	0.073654391	0.080948487	0.04815864	0.003270646	0.009915014	0.02207686	0.041076487	0.015535568	0.033994334	0.035977105
YJL080C_YGR078C	0	0	10	7	1	1	289220	640375	285552	639776	1222	199	5.67	4.61	134.808	23.115	0.050695012	0.025	0.073589534	0.05	0.068683565	0.12	0.012264922	0.02	0.028618152	0.035	0.003270646	0.01	0.098119379	0.085	0.022894522	0.06	0.098119379	0.1	0.090760425	0.05	0.045789043	0.035	0.07686018	0.04	0.080948487	0.065	0.003270646	0.015	0.02207686	0.025	0.015535568	0.01	0.035977105
YJL080C_YOL142W	0	0	10	15	1	0	289220	55557	285552	56279	1222	240	5.67	5.47	134.808	26.59	0.050695012	0.062240664	0.073589534	0.066390041	0.068683565	0.070539419	0.012264922	0.01659751	0.028618152	0.066390041	0.003270646	0.004149378	0.098119379	0.070539419	0.022894522	0.029045643	0.098119379	0.058091286	0.090760425	0.074688797	0.045789043	0.045643154	0.07686018	0.078838174	0.080948487	0.070539419	0.003270646	0.029045643	0.02207686	0.033195021	0.015535568	0.008298755	0.035977105
YJL080C_YCR027C	0	0	10	3	1	1	289220	167995	285552	167366	1222	209	5.67	5.92	134.808	23.338	0.050695012	0.061904762	0.073589534	0.057142857	0.068683565	0.104761905	0.012264922	0.023809524	0.028618152	0.033333333	0.003270646	0.004761905	0.098119379	0.066666667	0.022894522	0.028571429	0.098119379	0.076190476	0.090760425	0.076190476	0.045789043	0.019047619	0.07686018	0.061904762	0.080948487	0.080952381	0.003270646	0.023809524	0.02207686	0.028571429	0.015535568	0.00952381	0.035977105
YJL080C_YDR221W	0	0	10	4	1	0	289220	907327	285552	909435	1222	702	5.67	4.6	134.808	79.907	0.050695012	0.054054054	0.073589534	0.045519203	0.068683565	0.102418208	0.012264922	0.014224751	0.028618152	0.041251778	0.003270646	0.004267425	0.098119379	0.073968706	0.022894522	0.036984353	0.098119379	0.096728307	0.090760425	0.086770982	0.045789043	0.027027027	0.07686018	0.058321479	0.080948487	0.052631579	0.003270646	0.025604552	0.02207686	0.044096728	0.015535568	0.014224751	0.035977105
YJL080C_YLR186W	0	0	10	12	1	0	289220	523634	285552	524392	1222	252	5.67	8.45	134.808	27.895	0.050695012	0.055335968	0.073589534	0.063241107	0.068683565	0.110671937	0.012264922	0.023715415	0.028618152	0.023715415	0.003270646	0.003952569	0.098119379	0.086956522	0.022894522	0.031620553	0.098119379	0.043478261	0.090760425	0.075098814	0.045789043	0.051383399	0.07686018	0.083003953	0.080948487	0.067193676	0.003270646	0.023715415	0.02207686	0.019762846	0.015535568	0.023715415	0.035977105
YJL080C_YDL051W	0	0	10	4	1	0	289220	363952	285552	364779	1222	275	5.67	9.02	134.808	32.104	0.050695012	0.028985507	0.073589534	0.054347826	0.068683565	0.06884058	0.012264922	0.010869565	0.028618152	0.065217391	0.003270646	0.003623188	0.098119379	0.112318841	0.022894522	0.043478261	0.098119379	0.119565217	0.090760425	0.079710145	0.045789043	0.043478261	0.07686018	0.054347826	0.080948487	0.039855072	0.003270646	0.007246377	0.02207686	0.018115942	0.015535568	0.014492754	0.035977105
YJL080C_YDR451C	0	0	10	4	1	1	289220	1362174	285552	1361113	1222	353	5.67	10.75	134.808	39.598	0.050695012	0.025423729	0.073589534	0.056497175	0.068683565	0.070621469	0.012264922	0.016949153	0.028618152	0.036723164	0.003270646	0.002824859	0.098119379	0.104519774	0.022894522	0.036723164	0.098119379	0.056497175	0.090760425	0.118644068	0.045789043	0.081920904	0.07686018	0.042372881	0.080948487	0.050847458	0.003270646	0.016949153	0.02207686	0.014124294	0.015535568	0.033898305	0.035977105
YJL080C_YBL003C	0	0	10	2	1	1	289220	235795	285552	235397	1222	132	5.67	11.43	134.808	13.989	0.050695012	0.105263158	0.073589534	0.142857143	0.068683565	0.127819549	0.012264922	0.007518797	0.028618152	0.007518797	0.003270646	0	0.098119379	0.082706767	0.022894522	0.045112782	0.098119379	0.037593985	0.090760425	0.060150376	0.045789043	0.037593985	0.07686018	0.045112782	0.080948487	0.052631579	0.003270646	0	0.02207686	0.022556391	0.015535568	0.022556391	0.035977105
[truncated: 4,340 more rows]
[truncated: 150 more columns]
