# Supplementary material for: In silico characterization and prediction of global protein–mRNA interactions in yeast
Source: Oxford University Press journal article supplement (doi:10.1093/nar/gkr160), 2011-04-01
Supplement: 1371415_Supplementary_Data.zip [file 1371415_Supplementary_Data.zip › Dataset_S12.xls]

## Sheet: she2_rfsvmcommonpred.conv
### Protein mRNA interactions predicted both by RF and SVM
SHE2	YPS3	0.718
SHE2	FTR1	0.688
SHE2	ISU1	0.664
SHE2	EGT2	0.656
SHE2	GCN4	0.654
SHE2	MRP4	0.65
SHE2	MLF3	0.65
SHE2	UBX4	0.642
SHE2	CSG2	0.636
SHE2	SFK1	0.636
SHE2	YLR413W	0.636
SHE2	ARG8	0.636
SHE2	CUP9	0.632
SHE2	SAM3	0.63
SHE2	OST4	0.628
SHE2	YNL300W	0.628
SHE2	PPQ1	0.624
SHE2	NUP2	0.622
SHE2	OM14	0.62
SHE2	GTT3	0.618
SHE2	TPO4	0.618
SHE2	SVL3	0.614
SHE2	CHS7	0.612
SHE2	FLC3	0.61
SHE2	SGT1	0.61
SHE2	SLY41	0.61
SHE2	GAS5	0.606
SHE2	SIM1	0.606
SHE2	MRN1	0.606
SHE2	ALG12	0.604
SHE2	GPI13	0.602
SHE2	RNQ1	0.6
SHE2	WSC2	0.6
SHE2	ERG3	0.6
SHE2	RNR1	0.598
SHE2	CYS3	0.596
SHE2	UTR2	0.594
SHE2	OXA1	0.592
SHE2	SMX3	0.592
SHE2	DEF1	0.592
SHE2	TUP1	0.59
SHE2	SAC6	0.59
SHE2	GAS3	0.59
SHE2	PAN3	0.588
SHE2	SST2	0.588
SHE2	ISA1	0.582
SHE2	NAN1	0.582
SHE2	PET8	0.58
SHE2	CRH1	0.578
SHE2	COT1	0.576
SHE2	PMA1	0.574
SHE2	GVP36	0.574
SHE2	HEM15	0.574
SHE2	HRD1	0.574
SHE2	YEL007W	0.572
SHE2	RPS27A	0.572
SHE2	SWP1	0.572
SHE2	HHO1	0.572
SHE2	SSD1	0.57
SHE2	PPZ1	0.57
SHE2	AGA1	0.57
SHE2	WHI4	0.568
SHE2	YPR114W	0.568
SHE2	MCM4	0.568
SHE2	UPS1	0.566
SHE2	PHO91	0.566
SHE2	SMM1	0.566
SHE2	SVS1	0.566
SHE2	PMI40	0.564
SHE2	TOM7	0.564
SHE2	TSL1	0.562
SHE2	DHH1	0.56
SHE2	KES1	0.56
SHE2	SPE2	0.56
SHE2	NIF3	0.558
SHE2	MMF1	0.558
SHE2	MIR1	0.556
SHE2	ERG5	0.556
SHE2	RPS26B	0.554
SHE2	DMA2	0.554
SHE2	RPS29A	0.554
SHE2	RTN1	0.554
SHE2	TOS1	0.552
SHE2	MRH1	0.552
SHE2	ATP15	0.552
SHE2	ARO9	0.55
SHE2	RPL37A	0.55
SHE2	YIP3	0.55
SHE2	NOB1	0.55
SHE2	PBP4	0.548
SHE2	VPS55	0.548
SHE2	YPS1	0.548
SHE2	SDH2	0.548
SHE2	VRG4	0.546
SHE2	CCA1	0.546
SHE2	IDH1	0.546
SHE2	ARC35	0.546
SHE2	MVB12	0.546
SHE2	YNL190W	0.546
SHE2	HXT3	0.544
SHE2	AIM17	0.544
SHE2	FPS1	0.544
SHE2	ICY1	0.544
SHE2	MCT1	0.544
SHE2	HRR25	0.544
SHE2	NBA1	0.544
SHE2	VMA7	0.542
SHE2	ISA2	0.542
SHE2	HST3	0.542
SHE2	RRP40	0.542
SHE2	DFM1	0.54
SHE2	SED1	0.538
SHE2	NET1	0.538
SHE2	YNL305C	0.538
SHE2	YGR283C	0.536
SHE2	PFK2	0.536
SHE2	ALG6	0.536
SHE2	RER1	0.534
SHE2	PAM1	0.534
SHE2	OPT1	0.534
SHE2	MAS2	0.534
SHE2	BCY1	0.532
SHE2	COX7	0.532
SHE2	ACC1	0.532
SHE2	GDS1	0.532
SHE2	PDE2	0.532
SHE2	NRP1	0.53
SHE2	AHP1	0.53
SHE2	ROT1	0.53
SHE2	DSE4	0.53
SHE2	BAP2	0.528
SHE2	BMH2	0.528
SHE2	RPA12	0.528
SHE2	CAF40	0.528
SHE2	ABF2	0.528
SHE2	NGR1	0.526
SHE2	ZRT3	0.526
SHE2	NAM8	0.526
SHE2	CCS1	0.524
SHE2	FMN1	0.522
SHE2	UTH1	0.522
SHE2	NFU1	0.522
SHE2	SKN7	0.522
SHE2	PUB1	0.522
SHE2	YPL066W	0.522
SHE2	MAM3	0.522
SHE2	RPS8B	0.52
SHE2	TPO1	0.52
SHE2	INH1	0.518
SHE2	YER163C	0.518
SHE2	NDI1	0.518
SHE2	PGA1	0.518
SHE2	TOM6	0.518
SHE2	SRP14	0.516
SHE2	TAH1	0.516
SHE2	YBR139W	0.516
SHE2	PAT1	0.516
SHE2	COX8	0.516
SHE2	MGR1	0.514
SHE2	LCB1	0.514
SHE2	SEC22	0.514
SHE2	TFA1	0.512
SHE2	PRY3	0.512
SHE2	TAF3	0.512
SHE2	SYC1	0.512
SHE2	YET1	0.512
SHE2	EMC1	0.51
SHE2	LYP1	0.51
SHE2	TSA1	0.51
SHE2	YBT1	0.51
SHE2	QCR2	0.51
SHE2	PDR5	0.51
SHE2	YPR098C	0.51
SHE2	YOR342C	0.51
SHE2	MNI1	0.508
SHE2	VHS2	0.508
SHE2	KRE1	0.508
SHE2	TPK2	0.508
SHE2	SIT4	0.506
SHE2	ASM4	0.506
SHE2	LTP1	0.506
SHE2	THG1	0.504
SHE2	MRPL28	0.504
SHE2	CIS3	0.504
SHE2	ALG9	0.504
SHE2	TIM23	0.504
SHE2	AML1	0.502
SHE2	RET2	0.502
SHE2	IES3	0.502

## Sheet: SVMpred
YKL130C	YBR253W	0.506403	0.493597
YKL130C	YDL047W	0.578805	0.421195
YKL130C	YDL053C	0.559356	0.440644
YKL130C	YBL045C	0.528299	0.471701
YKL130C	YDL088C	0.541591	0.458409
YKL130C	YDL092W	0.532634	0.467366
YKL130C	YBL093C	0.518622	0.481378
YKL130C	YCL001W	0.530458	0.469542
YKL130C	YDL140C	0.518144	0.481856
YKL130C	YBR016W	0.552397	0.447603
YKL130C	YDL167C	0.510319	0.489681
YKL130C	YDL181W	0.519726	0.480274
YKL130C	YBR036C	0.531397	0.468603
YKL130C	YCL028W	0.516949	0.483051
YKL130C	YCL044C	0.588073	0.411927
YKL130C	YCL045C	0.537459	0.462541
YKL130C	YDL160C	0.56386	0.43614
YKL130C	YBR068C	0.522585	0.477415
YKL130C	YAL012W	0.599857	0.400143
YKL130C	YBR082C	0.652149	0.347851
YKL130C	YCR030C	0.562813	0.437187
YKL130C	YBR135W	0.549556	0.450444
YKL130C	YCR060W	0.542294	0.457706
YKL130C	YAL053W	0.559004	0.440996
YKL130C	YBR139W	0.51552	0.48448
YKL130C	YBR162C	0.63415	0.36585
YKL130C	YCR077C	0.506274	0.493726
YKL130C	YCR084C	0.643372	0.356628
YKL130C	YBR212W	0.617706	0.382294
YKL130C	YBR230C	0.631013	0.368987
YKL130C	YGL221C	0.546707	0.453293
YKL130C	YGL225W	0.525074	0.474926
YKL130C	YEL007W	0.612504	0.387496
YKL130C	YEL009C	0.661742	0.338258
YKL130C	YGR001C	0.553645	0.446355
YKL130C	YDR236C	0.567383	0.432617
YKL130C	YDR251W	0.542728	0.457272
YKL130C	YEL017W	0.613344	0.386656
YKL130C	YGR020C	0.527519	0.472481
YKL130C	YGR024C	0.514107	0.485893
YKL130C	YEL043W	0.583443	0.416557
YKL130C	YGR038W	0.50525	0.49475
YKL130C	YDR284C	0.515937	0.484063
YKL130C	YDR293C	0.57366	0.42634
YKL130C	YFR034C	0.530613	0.469387
YKL130C	YER003C	0.511047	0.488953
YKL130C	YER011W	0.575108	0.424892
YKL130C	YFR051C	0.54685	0.45315
YKL130C	YDL224C	0.60696	0.39304
YKL130C	YDL232W	0.64178	0.35822
YKL130C	YDR345C	0.507435	0.492565
YKL130C	YGL008C	0.599403	0.400597
YKL130C	YDL235C	0.574241	0.425759
YKL130C	YDR033W	0.579096	0.420904
YKL130C	YDR036C	0.513791	0.486209
YKL130C	YER070W	0.575576	0.424424
YKL130C	YDR059C	0.580808	0.419192
YKL130C	YDR411C	0.514796	0.485204
YKL130C	YER100W	0.509283	0.490717
YKL130C	YER102W	0.506056	0.493944
YKL130C	YDR077W	0.619038	0.380962
YKL130C	YDR451C	0.505774	0.494226
YKL130C	YER118C	0.538816	0.461184
YKL130C	YER131W	0.548847	0.451153
YKL130C	YDR129C	0.539765	0.460235
YKL130C	YDR462W	0.513689	0.486311
YKL130C	YER145C	0.534925	0.465075
YKL130C	YGL139W	0.603456	0.396544
YKL130C	YDR099W	0.564505	0.435495
YKL130C	YER154W	0.603366	0.396634
YKL130C	YER159C	0.506468	0.493532
YKL130C	YER163C	0.562763	0.437237
YKL130C	YER165W	0.510211	0.489789
YKL130C	YER168C	0.5131	0.4869
YKL130C	YDR529C	0.510657	0.489343
YKL130C	YKL164C	0.551958	0.448042
YKL130C	YKL175W	0.521959	0.478041
YKL130C	YKL182W	0.529314	0.470686
YKL130C	YHL021C	0.516781	0.483219
YKL130C	YHL027W	0.540699	0.459301
YKL130C	YIL041W	0.536827	0.463173
YKL130C	YIL051C	0.538653	0.461347
YKL130C	YJL212C	0.56053	0.43947
YKL130C	YHL004W	0.600853	0.399147
YKL130C	YKR007W	0.534441	0.465559
YKL130C	YHL032C	0.523215	0.476785
YKL130C	YIL110W	0.514131	0.485869
YKL130C	YJR044C	0.534305	0.465695
YKL130C	YKR013W	0.575324	0.424676
YKL130C	YHR021C	0.520282	0.479718
YKL130C	YIL135C	0.556361	0.443639
YKL130C	YJR063W	0.531402	0.468598
YKL130C	YKR042W	0.55365	0.44635
YKL130C	YKR052C	0.582302	0.417698
YKL130C	YKR065C	0.517523	0.482477
YKL130C	YHR024C	0.54729	0.45271
YKL130C	YHR042W	0.505675	0.494325
YKL130C	YJR077C	0.53085	0.46915
YKL130C	YJR117W	0.570476	0.429524
YKL130C	YHR086W	0.570134	0.429866
YKL130C	YHR089C	0.535634	0.464366
YKL130C	YJL004C	0.505876	0.494124
YKL130C	YHR137W	0.509969	0.490031
YKL130C	YHR142W	0.514638	0.485362
YKL130C	YKL025C	0.590564	0.409436
YKL130C	YKL028W	0.51394	0.48606
YKL130C	YGR189C	0.616313	0.383687
YKL130C	YHR161C	0.507194	0.492806
YKL130C	YKL040C	0.513675	0.486325
YKL130C	YKL051W	0.610087	0.389913
YKL130C	YJL076W	0.518615	0.481385
YKL130C	YJL078C	0.575214	0.424786
YKL130C	YJL079C	0.58827	0.41173
YKL130C	YHR206W	0.524128	0.475872
YKL130C	YGR283C	0.506961	0.493039
YKL130C	YJL143W	0.561175	0.438825
YKL130C	YJL158C	0.564743	0.435257
YKL130C	YKL156W	0.553844	0.446156
YKL130C	YIL033C	0.531332	0.468668
YKL130C	YIL034C	0.508454	0.491546
YKL130C	YJL166W	0.507097	0.492903
YKL130C	YMR215W	0.574977	0.425023
YKL130C	YNL239W	0.515067	0.484933
YKL130C	YNL255C	0.529824	0.470176
YKL130C	YLR144C	0.505536	0.494464
YKL130C	YMR256C	0.536845	0.463155
YKL130C	YNL268W	0.538221	0.461779
YKL130C	YLR120C	0.590904	0.409096
YKL130C	YLR121C	0.637064	0.362936
YKL130C	YML016C	0.586884	0.413116
YKL130C	YNL283C	0.643691	0.356309
YKL130C	YNL288W	0.549916	0.450084
YKL130C	YNL300W	0.655589	0.344411
YKL130C	YML028W	0.579614	0.420386
YKL130C	YMR296C	0.547572	0.452428
YKL130C	YNL305C	0.529616	0.470384
YKL130C	YNL322C	0.581569	0.418431
YKL130C	YNL327W	0.662411	0.337589
YKL130C	YLR185W	0.576858	0.423142
YKL130C	YLR193C	0.564825	0.435175
YKL130C	YMR303C	0.506823	0.493177
YKL130C	YKR074W	0.506049	0.493951
YKL130C	YML100W	0.576327	0.423673
YKL130C	YNL003C	0.541165	0.458835
YKL130C	YLR264W	0.537377	0.462623
YKL130C	YLR268W	0.51168	0.48832
YKL130C	YML120C	0.572685	0.427315
YKL130C	YNL016W	0.544466	0.455534
YKL130C	YNL037C	0.516366	0.483634
YKL130C	YMR002W	0.541882	0.458118
YKL130C	YMR015C	0.532257	0.467743
YKL130C	YNL044W	0.572188	0.427812
YKL130C	YMR038C	0.521268	0.478732
YKL130C	YNL066W	0.537522	0.462478
YKL130C	YNL070W	0.599962	0.400038
YKL130C	YNL074C	0.642795	0.357205
YKL130C	YNL078W	0.614845	0.385155
YKL130C	YLR335W	0.560881	0.439119
YKL130C	YNL094W	0.531969	0.468031
YKL130C	YLL023C	0.554509	0.445491
YKL130C	YLL027W	0.620065	0.379935
YKL130C	YLL028W	0.543433	0.456567
YKL130C	YLL031C	0.550562	0.449438
YKL130C	YLL041C	0.560859	0.439141
YKL130C	YLL043W	0.555992	0.444008
YKL130C	YLL048C	0.530781	0.469219
YKL130C	YLR350W	0.562689	0.437311
YKL130C	YMR067C	0.561867	0.438133
YKL130C	YMR072W	0.510148	0.489852
YKL130C	YNL116W	0.586984	0.413016
YKL130C	YLR388W	0.60572	0.39428
YKL130C	YLR395C	0.525466	0.474534
YKL130C	YLR052W	0.537777	0.462223
YKL130C	YLR056W	0.55453	0.44547
YKL130C	YLR407W	0.547739	0.452261
YKL130C	YLR413W	0.634835	0.365165
YKL130C	YNL156C	0.525857	0.474143
YKL130C	YNL158W	0.613608	0.386392
YKL130C	YNL161W	0.514418	0.485582
YKL130C	YMR149W	0.606612	0.393388
YKL130C	YNL186W	0.528689	0.471311
YKL130C	YNL219C	0.519737	0.480263
YKL130C	YLR109W	0.514004	0.485996
YKL130C	YLR113W	0.531563	0.468437
YKL130C	YMR195W	0.6123	0.3877
YKL130C	YMR200W	0.549771	0.450229
YKL130C	YMR205C	0.507505	0.492495
YKL130C	YOR045W	0.557924	0.442076
YKL130C	YPR063C	0.561977	0.438023
YKL130C	YPR067W	0.523811	0.476189
YKL130C	YPR073C	0.519891	0.480109
YKL130C	YOR025W	0.52701	0.47299
YKL130C	YOR052C	0.577716	0.422284
YKL130C	YOR056C	0.505001	0.494999
YKL130C	YOR057W	0.563873	0.436127
YKL130C	YPL011C	0.50855	0.49145
YKL130C	YPR114W	0.54171	0.45829
YKL130C	YPL032C	0.611806	0.388194
YKL130C	YNR013C	0.531218	0.468782
YKL130C	YNR015W	0.536763	0.463237
YKL130C	YNR016C	0.572943	0.427057
YKL130C	YNR017W	0.527089	0.472911
YKL130C	YPL066W	0.550308	0.449692
YKL130C	YPL075W	0.516011	0.483989
YKL130C	YPR182W	0.626561	0.373439
YKL130C	YPR191W	0.510294	0.489706
YKL130C	YNR030W	0.580831	0.419169
YKL130C	YNR035C	0.516233	0.483767
YKL130C	YNR044W	0.6042	0.3958
YKL130C	YNR046W	0.528083	0.471917
YKL130C	YOR153W	0.517231	0.482769
YKL130C	YNR061C	0.52197	0.47803
YKL130C	YNR067C	0.581274	0.418726
YKL130C	YOR163W	0.507148	0.492852
YKL130C	YOR176W	0.510065	0.489935
YKL130C	YPL126W	0.558072	0.441928
YKL130C	YPL127C	0.537629	0.462371
YKL130C	YPL135W	0.65178	0.34822
YKL130C	YOL013C	0.611854	0.388146
YKL130C	YOL030W	0.614718	0.385282
YKL130C	YOR179C	0.515823	0.484177
YKL130C	YOR201C	0.509273	0.490727
YKL130C	YPL145C	0.519102	0.480898
YKL130C	YOL001W	0.576763	0.423237
YKL130C	YOR212W	0.512761	0.487239
YKL130C	YOR220W	0.567454	0.432546
YKL130C	YOR221C	0.617033	0.382967
YKL130C	YPL163C	0.593221	0.406779
YKL130C	YPL177C	0.608324	0.391676
YKL130C	YPL179W	0.605298	0.394702
YKL130C	YOL039W	0.519759	0.480241
YKL130C	YOL052C	0.538586	0.461414
YKL130C	YOL060C	0.581543	0.418457
YKL130C	YPL203W	0.576877	0.423123
YKL130C	YPL204W	0.566236	0.433764
YKL130C	YOL070C	0.555198	0.444802
YKL130C	YPL221W	0.516989	0.483011
YKL130C	YPL234C	0.507668	0.492332
YKL130C	YPL247C	0.560507	0.439493
YKL130C	YOR307C	0.595881	0.404119
YKL130C	YOR311C	0.506799	0.493201
YKL130C	YOR316C	0.554725	0.445275
YKL130C	YOR322C	0.511919	0.488081
YKL130C	YPL271W	0.559887	0.440113
YKL130C	YPL273W	0.510565	0.489435
YKL130C	YPL274W	0.515476	0.484524
YKL130C	YOL140W	0.5317	0.4683
YKL130C	YOL142W	0.513087	0.486913
YKL130C	YOR002W	0.509399	0.490601
YKL130C	YOR355W	0.583806	0.416194
YKL130C	YOR360C	0.565129	0.434871
YKL130C	YPR011C	0.528544	0.471456
YKL130C	YPR019W	0.598539	0.401461
YKL130C	YIL123W	0.610732	0.389268
YKL130C	YOR273C	0.544916	0.455084
YKL130C	YHR041C	0.523093	0.476907
YKL130C	YKL054C	0.567439	0.432561
YKL130C	YGR206W	0.601635	0.398365
YKL130C	YPR098C	0.581235	0.418765
YKL130C	YKL065C	0.507615	0.492385
YKL130C	YOR342C	0.558731	0.441269
YKL130C	YDR233C	0.600686	0.399314
YKL130C	YNL190W	0.628457	0.371543
YKL130C	YEL040W	0.59599	0.40401
YKL130C	YPL184C	0.615196	0.384804
YKL130C	YLR452C	0.587624	0.412376

## Sheet: RFpred
YKL130C	YDL045C	0.508	0.492
YKL130C	YDL047W	0.506	0.494
YKL130C	YDL053C	0.548	0.452
YKL130C	YBL032W	0.56	0.44
YKL130C	YDL088C	0.506	0.494
YKL130C	YDL092W	0.516	0.484
YKL130C	YDL108W	0.518	0.482
YKL130C	YBR003W	0.512	0.488
YKL130C	YCL001W	0.534	0.466
YKL130C	YBR015C	0.584	0.416
YKL130C	YDL167C	0.53	0.47
YKL130C	YDL168W	0.506	0.494
YKL130C	YDL181W	0.518	0.482
YKL130C	YDL182W	0.536	0.464
YKL130C	YBR036C	0.636	0.364
YKL130C	YCL025C	0.522	0.478
YKL130C	YCL028W	0.6	0.4
YKL130C	YCL044C	0.514	0.486
YKL130C	YCL045C	0.51	0.49
YKL130C	YDL160C	0.56	0.44
YKL130C	YBR068C	0.528	0.472
YKL130C	YBR069C	0.56	0.44
YKL130C	YAL012W	0.596	0.404
YKL130C	YBR106W	0.522	0.478
YKL130C	YCR028C	0.516	0.484
YKL130C	YCR034W	0.56	0.44
YKL130C	YCR060W	0.516	0.484
YKL130C	YBR139W	0.516	0.484
YKL130C	YBR145W	0.506	0.494
YKL130C	YBR162C	0.552	0.448
YKL130C	YCR077C	0.516	0.484
YKL130C	YCR084C	0.59	0.41
YKL130C	YBR187W	0.532	0.468
YKL130C	YBR207W	0.544	0.456
YKL130C	YBR212W	0.526	0.474
YKL130C	YBR230C	0.62	0.38
YKL130C	YDL018C	0.508	0.492
YKL130C	YGL221C	0.558	0.442
YKL130C	YGL225W	0.546	0.454
YKL130C	YDR210W	0.532	0.468
YKL130C	YDR194C	0.54	0.46
YKL130C	YDR205W	0.536	0.464
YKL130C	YEL007W	0.572	0.428
YKL130C	YEL009C	0.654	0.346
YKL130C	YGL253W	0.528	0.472
YKL130C	YGR001C	0.502	0.498
YKL130C	YDR236C	0.522	0.478
YKL130C	YDR251W	0.534	0.466
YKL130C	YEL017W	0.618	0.382
YKL130C	YGR020C	0.542	0.458
YKL130C	YGR024C	0.504	0.496
YKL130C	YDR262W	0.506	0.494
YKL130C	YDR293C	0.57	0.43
YKL130C	YDR297W	0.514	0.486
YKL130C	YEL051W	0.53	0.47
YKL130C	YEL058W	0.536	0.464
YKL130C	YEL065W	0.566	0.434
YKL130C	YFR037C	0.52	0.48
YKL130C	YDL188C	0.57	0.43
YKL130C	YDR304C	0.546	0.454
YKL130C	YER003C	0.564	0.436
YKL130C	YFR051C	0.502	0.498
YKL130C	YFR052W	0.53	0.47
YKL130C	YDL224C	0.568	0.432
YKL130C	YDL232W	0.628	0.372
YKL130C	YDR328C	0.504	0.496
YKL130C	YDR345C	0.544	0.456
YKL130C	YER020W	0.55	0.45
YKL130C	YGL008C	0.574	0.426
YKL130C	YGL012W	0.54	0.46
YKL130C	YGL040C	0.592	0.408
YKL130C	YGL048C	0.502	0.498
YKL130C	YDR033W	0.552	0.448
YKL130C	YDR044W	0.52	0.48
YKL130C	YER070W	0.598	0.402
YKL130C	YGL055W	0.566	0.434
YKL130C	YDR012W	0.518	0.482
YKL130C	YGL077C	0.564	0.436
YKL130C	YDR411C	0.54	0.46
YKL130C	YER091C	0.534	0.466
YKL130C	YER102W	0.52	0.48
YKL130C	YDR077W	0.538	0.462
YKL130C	YDR084C	0.544	0.456
YKL130C	YER131W	0.554	0.446
YKL130C	YDR129C	0.59	0.41
YKL130C	YDR135C	0.506	0.494
YKL130C	YDR462W	0.504	0.496
YKL130C	YDR463W	0.502	0.498
YKL130C	YER141W	0.508	0.492
YKL130C	YER145C	0.688	0.312
YKL130C	YGL139W	0.61	0.39
YKL130C	YDR099W	0.528	0.472
YKL130C	YDR105C	0.552	0.448
YKL130C	YDR493W	0.508	0.492
YKL130C	YER154W	0.592	0.408
YKL130C	YER163C	0.518	0.482
YKL130C	YER168C	0.546	0.454
YKL130C	YGL206C	0.524	0.476
YKL130C	YDR168W	0.51	0.49
YKL130C	YDR178W	0.546	0.454
YKL130C	YDR530C	0.582	0.418
YKL130C	YKL175W	0.526	0.474
YKL130C	YKL184W	0.55	0.45
YKL130C	YHL021C	0.544	0.456
YKL130C	YIL041W	0.574	0.426
YKL130C	YIL051C	0.558	0.442
YKL130C	YJL212C	0.534	0.466
YKL130C	YHL004W	0.65	0.35
YKL130C	YIL088C	0.502	0.498
YKL130C	YJR016C	0.508	0.492
YKL130C	YKR003W	0.532	0.468
YKL130C	YIL108W	0.518	0.482
YKL130C	YIL110W	0.508	0.492
YKL130C	YJR041C	0.546	0.454
YKL130C	YJR044C	0.548	0.452
YKL130C	YJR049C	0.55	0.45
YKL130C	YHR009C	0.522	0.478
YKL130C	YIL135C	0.508	0.492
YKL130C	YJR062C	0.508	0.492
YKL130C	YJR063W	0.528	0.472
YKL130C	YKR042W	0.522	0.478
YKL130C	YKR059W	0.518	0.482
YKL130C	YKR062W	0.506	0.494
YKL130C	YHR024C	0.534	0.466
YKL130C	YIL148W	0.534	0.466
YKL130C	YIL153W	0.502	0.498
YKL130C	YJR075W	0.59	0.41
YKL130C	YJR077C	0.556	0.444
YKL130C	YGR101W	0.544	0.456
YKL130C	YJR143C	0.546	0.454
YKL130C	YGR111W	0.504	0.496
YKL130C	YGR116W	0.502	0.498
YKL130C	YGR117C	0.554	0.446
YKL130C	YHR086W	0.526	0.474
YKL130C	YGR162W	0.53	0.47
YKL130C	YJL002C	0.578	0.422
YKL130C	YJL011C	0.524	0.476
YKL130C	YGR132C	0.502	0.498
YKL130C	YHR137W	0.55	0.45
YKL130C	YHR142W	0.612	0.388
YKL130C	YHR147C	0.514	0.486
YKL130C	YKL008C	0.506	0.494
YKL130C	YKL025C	0.588	0.412
YKL130C	YKL028W	0.512	0.488
YKL130C	YGR189C	0.578	0.422
YKL130C	YHR162W	0.554	0.446
YKL130C	YJL042W	0.532	0.468
YKL130C	YJL052W	0.516	0.484
YKL130C	YKL040C	0.522	0.478
YKL130C	YKL051W	0.636	0.364
YKL130C	YJL076W	0.538	0.462
YKL130C	YJL078C	0.512	0.488
YKL130C	YGR277C	0.518	0.482
YKL130C	YHR206W	0.522	0.478
YKL130C	YGR234W	0.536	0.464
YKL130C	YGR240C	0.504	0.496
YKL130C	YGR253C	0.538	0.462
YKL130C	YGR255C	0.582	0.418
YKL130C	YGR282C	0.502	0.498
YKL130C	YGR283C	0.536	0.464
YKL130C	YGR286C	0.53	0.47
YKL130C	YJL138C	0.516	0.484
YKL130C	YJL158C	0.504	0.496
YKL130C	YKL156W	0.572	0.428
YKL130C	YIL033C	0.532	0.468
YKL130C	YMR208W	0.61	0.39
YKL130C	YMR215W	0.59	0.41
YKL130C	YMR221C	0.574	0.426
YKL130C	YNL246W	0.518	0.482
YKL130C	YLR153C	0.53	0.47
YKL130C	YMR243C	0.514	0.486
YKL130C	YMR256C	0.532	0.468
YKL130C	YNL268W	0.51	0.49
YKL130C	YLR120C	0.548	0.452
YKL130C	YLR121C	0.718	0.282
YKL130C	YML016C	0.57	0.43
YKL130C	YMR272C	0.554	0.446
YKL130C	YMR276W	0.538	0.462
YKL130C	YMR281W	0.566	0.434
YKL130C	YNL283C	0.6	0.4
YKL130C	YNL288W	0.528	0.472
YKL130C	YNL290W	0.514	0.486
YKL130C	YNL300W	0.628	0.372
YKL130C	YML028W	0.51	0.49
YKL130C	YMR292W	0.504	0.496
YKL130C	YMR296C	0.514	0.486
YKL130C	YMR297W	0.544	0.456
YKL130C	YNL301C	0.534	0.466
YKL130C	YNL305C	0.538	0.462
YKL130C	YNL307C	0.512	0.488
YKL130C	YNL312W	0.51	0.49
YKL130C	YNL322C	0.508	0.492
YKL130C	YNL323W	0.562	0.438
YKL130C	YNL327W	0.656	0.344
YKL130C	YLR185W	0.55	0.45
YKL130C	YLR193C	0.566	0.434
YKL130C	YMR309C	0.528	0.472
YKL130C	YMR319C	0.518	0.482
YKL130C	YKR066C	0.536	0.464
YKL130C	YKR087C	0.512	0.488
YKL130C	YML100W	0.562	0.438
YKL130C	YNL003C	0.58	0.42
YKL130C	YKR094C	0.574	0.426
YKL130C	YKR100C	0.516	0.484
YKL130C	YLR268W	0.514	0.486
YKL130C	YML115C	0.506	0.494
YKL130C	YML120C	0.518	0.482
YKL130C	YNL016W	0.522	0.478
YKL130C	YNL037C	0.546	0.454
YKL130C	YLR290C	0.528	0.472
YKL130C	YMR015C	0.556	0.444
YKL130C	YNL044W	0.55	0.45
YKL130C	YMR026C	0.586	0.414
YKL130C	YMR038C	0.524	0.476
YKL130C	YNL070W	0.564	0.436
YKL130C	YNL071W	0.546	0.454
YKL130C	YNL074C	0.65	0.35
YKL130C	YLR335W	0.622	0.378
YKL130C	YMR054W	0.546	0.454
YKL130C	YLL027W	0.582	0.418
YKL130C	YLL028W	0.52	0.48
YKL130C	YLL031C	0.602	0.398
YKL130C	YLL041C	0.548	0.452
YKL130C	YLL043W	0.544	0.456
YKL130C	YLL048C	0.51	0.49
YKL130C	YMR067C	0.642	0.358
YKL130C	YMR072W	0.528	0.472
YKL130C	YMR083W	0.53	0.47
YKL130C	YNL116W	0.554	0.446
YKL130C	YLR388W	0.554	0.446
YKL130C	YLR395C	0.516	0.484
YKL130C	YMR089C	0.512	0.488
YKL130C	YMR110C	0.516	0.484
YKL130C	YLR048W	0.524	0.476
YKL130C	YLR052W	0.502	0.498
YKL130C	YLR056W	0.6	0.4
YKL130C	YLR413W	0.636	0.364
YKL130C	YNL158W	0.518	0.482
YKL130C	YLR022C	0.536	0.464
YKL130C	YLR028C	0.514	0.486
YKL130C	YLR034C	0.508	0.492
YKL130C	YMR145C	0.536	0.464
YKL130C	YMR149W	0.572	0.428
YKL130C	YNL219C	0.504	0.496
YKL130C	YLR109W	0.53	0.47
YKL130C	YMR195W	0.544	0.456
YKL130C	YMR200W	0.53	0.47
YKL130C	YMR205C	0.536	0.464
YKL130C	YOR045W	0.518	0.482
YKL130C	YPR067W	0.542	0.458
YKL130C	YPR073C	0.506	0.494
YKL130C	YOR025W	0.542	0.458
YKL130C	YPR105C	0.53	0.47
YKL130C	YOR048C	0.582	0.418
YKL130C	YOR051C	0.548	0.452
YKL130C	YOR056C	0.55	0.45
YKL130C	YOR057W	0.61	0.39
YKL130C	YPL011C	0.512	0.488
YKL130C	YPR113W	0.516	0.484
YKL130C	YPR114W	0.568	0.432
YKL130C	YPR127W	0.574	0.426
YKL130C	YPL032C	0.614	0.386
YKL130C	YPR144C	0.504	0.496
YKL130C	YPL050C	0.508	0.492
YKL130C	YPL059W	0.532	0.468
YKL130C	YPR163C	0.54	0.46
YKL130C	YNR013C	0.566	0.434
YKL130C	YNR015W	0.566	0.434
YKL130C	YNR016C	0.532	0.468
YKL130C	YNR017W	0.504	0.496
YKL130C	YPL066W	0.522	0.478
YKL130C	YPL078C	0.594	0.406
YKL130C	YPR182W	0.592	0.408
YKL130C	YPR188C	0.508	0.492
YKL130C	YPR191W	0.51	0.49
YKL130C	YNR030W	0.604	0.396
YKL130C	YNR035C	0.546	0.454
YKL130C	YNR043W	0.552	0.448
YKL130C	YNR044W	0.57	0.43
YKL130C	YOR142W	0.504	0.496
YKL130C	YOR150W	0.51	0.49
YKL130C	YOR153W	0.51	0.49
YKL130C	YNR067C	0.53	0.47
YKL130C	YOR176W	0.574	0.426
YKL130C	YPL117C	0.502	0.498
YKL130C	YPL126W	0.582	0.418
YKL130C	YPL127C	0.572	0.428
YKL130C	YPL134C	0.512	0.488
YKL130C	YPL135W	0.664	0.336
YKL130C	YOL012C	0.534	0.466
YKL130C	YOL013C	0.574	0.426
YKL130C	YOL030W	0.606	0.394
YKL130C	YOR179C	0.512	0.488
YKL130C	YOR197W	0.534	0.466
YKL130C	YPL145C	0.56	0.44
YKL130C	YOR221C	0.544	0.456
YKL130C	YPL163C	0.566	0.434
YKL130C	YPL177C	0.632	0.368
YKL130C	YPL179W	0.624	0.376
YKL130C	YOL052C	0.56	0.44
YKL130C	YOL060C	0.522	0.478
YKL130C	YOR236W	0.506	0.494
YKL130C	YPL199C	0.512	0.488
YKL130C	YPL203W	0.508	0.492
YKL130C	YPL204W	0.544	0.456
YKL130C	YPL210C	0.508	0.492
YKL130C	YOL070C	0.544	0.456
YKL130C	YOR259C	0.55	0.45
YKL130C	YOR264W	0.6	0.4
YKL130C	YOR276W	0.528	0.472
YKL130C	YPL232W	0.528	0.472
YKL130C	YOL094C	0.532	0.468
YKL130C	YOR307C	0.61	0.39
YKL130C	YOR316C	0.576	0.424
YKL130C	YPL271W	0.552	0.448
YKL130C	YPL274W	0.63	0.37
YKL130C	YOL129W	0.512	0.488
YKL130C	YOL140W	0.636	0.364
YKL130C	YOL142W	0.542	0.458
YKL130C	YOR002W	0.536	0.464
YKL130C	YOR355W	0.532	0.468
YKL130C	YOR360C	0.532	0.468
YKL130C	YOR362C	0.502	0.498
YKL130C	YPR019W	0.568	0.432
YKL130C	YPR023C	0.522	0.478
YKL130C	YOR272W	0.524	0.476
YKL130C	YIL123W	0.606	0.394
YKL130C	YOR273C	0.618	0.382
YKL130C	YPL208W	0.502	0.498
YKL130C	YKL077W	0.536	0.464
YKL130C	YOR283W	0.52	0.48
YKL130C	YCR044C	0.528	0.472
YKL130C	YKL054C	0.592	0.408
YKL130C	YGR206W	0.546	0.454
YKL130C	YEL001C	0.506	0.494
YKL130C	YPR098C	0.51	0.49
YKL130C	YGR235C	0.516	0.484
YKL130C	YKL065C	0.512	0.488
YKL130C	YOR342C	0.51	0.49
YKL130C	YDR233C	0.554	0.446
YKL130C	YNL190W	0.546	0.454
YKL130C	YFR044C	0.512	0.488
YKL130C	YEL040W	0.594	0.406
YKL130C	YPL184C	0.606	0.394
YKL130C	YLR452C	0.588	0.412

## Sheet: GO_SVM
### GO enrichement analysis from http://go.princeton.edu/tmp/7840684/query_tab.txt
P-value cutoff	0.01
Calculate FDR	Yes
Regulation links followed	Yes
Bonferroni correction	Yes
Annotation file	gene_association.sgd
Evidence codes used	ISM (145), IEA (41674), IEP (159), IGI (2886), NAS (710), IPI (2625), ND (4077), ISO (3), IC (561), ISS (2552), ISA (108), IMP (9468), IDA (16089), RCA (6099), TAS (2649)
GOID	TERM	CORRECTED_PVALUE	UNCORRECTED_PVALUE	NUM_LIST_ANNOTATIONS	LIST_SIZE	TOTAL_NUM_ANNOTATIONS	POPULATION_SIZE	FDR_RATE	EXPECTED_FALSE_POSITIVES	ANNOTATED_GENES
GO:0009987	cellular process	3.86274e-05	5.15032e-08	229	266	5193	7166	0	0	YOR179C, YPL126W, YIL123W, YER102W, YNL016W, YDR099W, YPR019W, YEL009C, YER011W, YHR206W, YDL092W, YGR189C, YHR086W, YDR036C, YER154W, YDL232W, YOR360C, YKL051W, YLL027W, YBR253W, YJR063W, YNL268W, YNR035C, YER145C, YCL045C, YMR149W, YLR388W, YMR072W, YNL003C, YML028W, YOR163W, YNR044W, YCR060W, YOR057W, YOR221C, YPL203W, YLR335W, YER100W, YBR082C, YMR002W, YLR185W, YLR452C, YCR077C, YPL011C, YMR…
GO:0071554	cell wall organization or biogenesis	6.43511e-05	8.58015e-08	31	266	291	7166	0	0	YDR077W, YDR129C, YIL123W, YDR099W, YPL163C, YMR215W, YLR144C, YEL040W, YNL283C, YPL221W, YDL047W, YGR189C, YHL027W, YDR293C, YNL322C, YOL030W, YLR121C, YNR067C, YLR120C, YER003C, YKR042W, YHR142W, YOL013C, YNL161W, YMR200W, YNL066W, YKL164C, YLL031C, YLL043W, YJL158C, YAL053W
GO:0051234	establishment of localization	0.000108004	1.44006e-07	86	266	1376	7166	0	0	YNL158W, YCL001W, YEL009C, YOR153W, YHR024C, YDL092W, YLL028W, YER154W, YIL041W, YDL181W, YNL268W, YNR035C, YER145C, YNL003C, YDL224C, YFR051C, YLL048C, YLR335W, YDR033W, YHR161C, YPL221W, YPL271W, YJL212C, YJL004C, YPL204W, YKL065C, YGL008C, YJL166W, YOL060C, YKR007W, YLR268W, YLL043W, YPR191W, YDR284C, YGR206W, YGR020C, YOR316C, YPL234C, YAL053W, YPR011C, YNL044W, YER118C, YDR129C, YGL225W, YNL…
GO:0006811	ion transport	0.000150404	2.00539e-07	25	266	210	7166	0	0	YMR038C, YJR077C, YPL271W, YGL008C, YJL166W, YDL181W, YOL060C, YER145C, YBL045C, YLR395C, YMR256C, YKR007W, YKR052C, YNR013C, YKL175W, YLL043W, YLL048C, YPR191W, YDR529C, YDR284C, YGR020C, YOR316C, YPL234C, YDR033W, YLL041C
GO:0051179	localization	0.000200946	2.67929e-07	89	266	1462	7166	0	0	YNL158W, YCL001W, YEL009C, YOR153W, YHR024C, YDL092W, YLL028W, YER154W, YIL041W, YDL181W, YNL268W, YNR035C, YER145C, YMR072W, YNL003C, YDL224C, YKL040C, YFR051C, YLL048C, YLR335W, YDR033W, YHR161C, YPL221W, YPL271W, YJL212C, YJL004C, YPL204W, YKL065C, YGL008C, YJL166W, YOL060C, YKR007W, YLR268W, YLL043W, YPR191W, YDR284C, YGR206W, YGR020C, YOR316C, YPL234C, YAL053W, YPR011C, YNL044W, YER118C, YDR…
GO:0006810	transport	0.000245725	3.27633e-07	83	266	1334	7166	0	0	YCL001W, YEL009C, YOR153W, YHR024C, YDL092W, YLL028W, YER154W, YIL041W, YDL181W, YNL268W, YNR035C, YER145C, YNL003C, YDL224C, YFR051C, YLL048C, YLR335W, YDR033W, YHR161C, YPL221W, YPL271W, YJL212C, YJL004C, YPL204W, YKL065C, YGL008C, YJL166W, YOL060C, YKR007W, YLR268W, YLL043W, YPR191W, YDR284C, YGR206W, YGR020C, YOR316C, YPL234C, YAL053W, YPR011C, YNL044W, YER118C, YDR129C, YGL225W, YNL070W, YDL…
GO:0070882	cellular cell wall organization or biogenesis	0.000617446	8.23261e-07	29	266	289	7166	0	0	YDR077W, YDR129C, YIL123W, YDR099W, YPL163C, YMR215W, YEL040W, YNL283C, YPL221W, YDL047W, YGR189C, YHL027W, YDR293C, YNL322C, YOL030W, YLR121C, YLR120C, YER003C, YKR042W, YHR142W, YOL013C, YNL161W, YMR200W, YNL066W, YKL164C, YLL031C, YLL043W, YJL158C, YAL053W
GO:0007047	cellular cell wall organization	0.00235556	3.14075e-06	26	266	259	7166	0	0	YDR077W, YDR129C, YIL123W, YPL163C, YMR215W, YEL040W, YNL283C, YPL221W, YDL047W, YGR189C, YDR293C, YNL322C, YOL030W, YLR121C, YLR120C, YKR042W, YHR142W, YOL013C, YNL161W, YMR200W, YNL066W, YKL164C, YLL031C, YLL043W, YJL158C, YAL053W
GO:0045229	external encapsulating structure organization	0.00235556	3.14075e-06	26	266	259	7166	0	0	YDR077W, YDR129C, YIL123W, YPL163C, YMR215W, YEL040W, YNL283C, YPL221W, YDL047W, YGR189C, YDR293C, YNL322C, YOL030W, YLR121C, YLR120C, YKR042W, YHR142W, YOL013C, YNL161W, YMR200W, YNL066W, YKL164C, YLL031C, YLL043W, YJL158C, YAL053W
GO:0071555	cell wall organization	0.00235556	3.14075e-06	26	266	259	7166	0	0	YDR077W, YDR129C, YIL123W, YPL163C, YMR215W, YEL040W, YNL283C, YPL221W, YDL047W, YGR189C, YDR293C, YNL322C, YOL030W, YLR121C, YLR120C, YKR042W, YHR142W, YOL013C, YNL161W, YMR200W, YNL066W, YKL164C, YLL031C, YLL043W, YJL158C, YAL053W

## Sheet: GO_RF
### GO enrichement analysis from http://go.princeton.edu/tmp/7840684/query_tab.txt
P-value cutoff	0.01
Calculate FDR	Yes
Regulation links followed	Yes
Bonferroni correction	Yes
Annotation file	gene_association.sgd
Evidence codes used	ISM (145), IEA (41674), IEP (159), IGI (2886), NAS (710), IPI (2625), ND (4077), ISO (3), IC (561), ISS (2552), ISA (108), IMP (9468), IDA (16089), RCA (6099), TAS (2649)
GOID	TERM	CORRECTED_PVALUE	UNCORRECTED_PVALUE	NUM_LIST_ANNOTATIONS	LIST_SIZE	TOTAL_NUM_ANNOTATIONS	POPULATION_SIZE	FDR_RATE	EXPECTED_FALSE_POSITIVES	ANNOTATED_GENES
GO:0009987	cellular process	4.28852e-10	4.89557e-13	304	345	5193	7166	0	0	YIL123W, YMR083W, YDR135C, YER102W, YJL052W, YEL009C, YFR044C, YGR189C, YDL092W, YGR253C, YGR116W, YOR360C, YNR035C, YLR388W, YMR072W, YNL003C, YML028W, YNR044W, YCR060W, YOR057W, YPL203W, YFR052W, YLR185W, YPL011C, YOR197W, YMR215W, YBR015C, YDL047W, YJL212C, YER070W, YMR205C, YLR121C, YER141W, YOR264W, YBR003W, YNR015W, YKR066C, YLR268W, YKR100C, YMR296C, YMR015C, YJR049C, YKR003W, YDR328C, YDL…
GO:0055114	oxidation reduction	7.5422e-08	8.60982e-11	48	345	364	7166	0	0	YMR083W, YMR015C, YLR056W, YGR255C, YLR109W, YJL052W, YDR297W, YJR077C, YFR044C, YMR272C, YNL071W, YOR142W, YGL055W, YDL181W, YMR110C, YBR145W, YLR395C, YNL037C, YML028W, YMR256C, YDR178W, YOR150W, YPL135W, YDR044W, YPR127W, YHL021C, YGL012W, YDL168W, YMR145C, YMR038C, YPL078C, YPL271W, YPL032C, YER070W, YPL134C, YGR132C, YER141W, YML120C, YDR251W, YBR003W, YNR015W, YGR234W, YOR236W, YPL059W, YKR…
GO:0051186	cofactor metabolic process	4.53409e-07	5.1759e-10	34	345	215	7166	0	0	YMR083W, YGR255C, YJR049C, YFR044C, YNL071W, YOR142W, YLL027W, YDL181W, YGR286C, YGL040C, YBR145W, YNL037C, YMR243C, YDR178W, YKL184W, YKL040C, YPL135W, YDR044W, YMR145C, YPR067W, YOR176W, YMR208W, YDL045C, YER141W, YGR277C, YML120C, YDR236C, YBR003W, YOR236W, YPL059W, YOL052C, YPR191W, YLR153C, YLL041C
GO:0006811	ion transport	9.8006e-07	1.11879e-09	33	345	210	7166	0	0	YDR135C, YJR077C, YDL181W, YER145C, YLR395C, YMR054W, YBR207W, YMR256C, YNR013C, YDR178W, YMR243C, YKL175W, YLL048C, YDR033W, YMR038C, YEL065W, YPL078C, YMR319C, YBR106W, YPL271W, YEL051W, YDR205W, YGL008C, YOL060C, YCL025C, YGL077C, YLL043W, YPR191W, YLR034C, YGR020C, YOR316C, YOL129W, YLL041C
GO:0009058	biosynthetic process	5.13284e-05	5.85941e-08	167	345	2489	7166	0	0	YOR179C, YPL126W, YMR083W, YNL016W, YDR099W, YER102W, YPR019W, YJL052W, YEL009C, YMR272C, YHR206W, YDL092W, YHR086W, YDL232W, YGR116W, YOR360C, YLL027W, YKL051W, YGR286C, YJR063W, YMR149W, YLR388W, YML028W, YNR044W, YKL184W, YCR060W, YOR221C, YDL188C, YLR335W, YPR113W, YDL168W, YLR185W, YLR452C, YPL011C, YCR077C, YBR015C, YPL271W, YER070W, YMR205C, YLR121C, YCR044C, YHR147C, YER141W, YCL025C, YBL…
GO:0048878	chemical homeostasis	6.65034e-05	7.59172e-08	26	345	166	7166	0	0	YEL065W, YJR049C, YKR003W, YDR493W, YDR135C, YDR328C, YEL051W, YDR205W, YGL008C, YCR044C, YOL060C, YER145C, YMR054W, YBR207W, YBR036C, YML016C, YPL177C, YMR243C, YKL175W, YKL040C, YPL135W, YLL048C, YLR034C, YGR020C, YOR316C, YOL129W
GO:0055080	cation homeostasis	0.000135382	1.54546e-07	21	345	118	7166	0	0	YEL065W, YJR049C, YDR493W, YDR328C, YEL051W, YDR205W, YGL008C, YCR044C, YOL060C, YER145C, YMR054W, YBR036C, YML016C, YPL177C, YMR243C, YKL175W, YKL040C, YPL135W, YLR034C, YGR020C, YOR316C
GO:0050801	ion homeostasis	0.000230906	2.63591e-07	25	345	165	7166	0	0	YEL065W, YJR049C, YDR493W, YDR135C, YDR328C, YEL051W, YDR205W, YGL008C, YCR044C, YOL060C, YER145C, YMR054W, YBR207W, YBR036C, YML016C, YPL177C, YMR243C, YKL175W, YKL040C, YPL135W, YLL048C, YLR034C, YGR020C, YOR316C, YOL129W
GO:0044249	cellular biosynthetic process	0.000236949	2.7049e-07	163	345	2461	7166	0	0	YOR179C, YPL126W, YNL016W, YDR099W, YER102W, YPR019W, YJL052W, YEL009C, YMR272C, YHR206W, YDL092W, YHR086W, YDL232W, YGR116W, YOR360C, YLL027W, YKL051W, YGR286C, YJR063W, YMR149W, YLR388W, YML028W, YNR044W, YKL184W, YCR060W, YOR221C, YDL188C, YLR335W, YPR113W, YLR185W, YLR452C, YPL011C, YCR077C, YBR015C, YPL271W, YER070W, YMR205C, YLR121C, YCR044C, YHR147C, YER141W, YCL025C, YBL032W, YDR194C, YBR…
GO:0008610	lipid biosynthetic process	0.000260056	2.96867e-07	25	345	166	7166	0	0	YPL145C, YNL158W, YMR015C, YLR056W, YDR297W, YNR016C, YMR272C, YMR208W, YKL008C, YKL051W, YGL055W, YCR044C, YNR043W, YBR003W, YMR281W, YBR036C, YPL117C, YNL219C, YOR221C, YLL031C, YMR296C, YCR034W, YGL012W, YPR113W, YNR030W
GO:0051234	establishment of localization	0.000324982	3.70984e-07	104	345	1376	7166	0	0	YBR069C, YNL158W, YDR135C, YCL001W, YEL009C, YOR153W, YHR024C, YMR272C, YDL092W, YLL028W, YER154W, YDR084C, YIL041W, YGL055W, YDL181W, YNL268W, YNR035C, YLR048W, YER145C, YMR054W, YMR089C, YNL003C, YNL323W, YMR243C, YDL224C, YFR051C, YLL048C, YLR335W, YDR033W, YPL271W, YBR106W, YJL212C, YPL204W, YPL134C, YKL065C, YGL008C, YOL060C, YCL025C, YGR234W, YLR268W, YGL077C, YLL043W, YGR206W, YPR191W, YLR…
GO:0030003	cellular cation homeostasis	0.000342775	3.91296e-07	20	345	114	7166	0	0	YEL065W, YJR049C, YDR493W, YDR328C, YEL051W, YDR205W, YCR044C, YOL060C, YER145C, YMR054W, YBR036C, YML016C, YPL177C, YMR243C, YKL175W, YKL040C, YPL135W, YLR034C, YGR020C, YOR316C
GO:0042592	homeostatic process	0.000362247	4.13524e-07	33	345	266	7166	0	0	YJR049C, YKR003W, YDR493W, YDR135C, YLR109W, YNL312W, YDR328C, YLR052W, YER145C, YMR054W, YBR207W, YML028W, YBR036C, YML016C, YPL177C, YMR243C, YKL175W, YKL040C, YPL135W, YLL048C, YEL065W, YEL051W, YDR205W, YGL008C, YOL060C, YCR044C, YBL032W, YKL054C, YPL059W, YLR034C, YGR020C, YOR316C, YOL129W
GO:0008152	metabolic process	0.000506474	5.78167e-07	250	345	4305	7166	0	0	YOR179C, YPL126W, YMR083W, YNL016W, YDR099W, YER102W, YPR019W, YJL052W, YNL307C, YEL009C, YFR044C, YMR272C, YHR206W, YGR189C, YDL092W, YGR253C, YHR086W, YDL232W, YGR116W, YOR360C, YLL027W, YKL051W, YGR286C, YJR063W, YCL045C, YMR149W, YMR089C, YLR388W, YML028W, YNR044W, YMR243C, YKL184W, YOR362C, YCR060W, YOR221C, YOR057W, YDL188C, YPL203W, YPR127W, YHL021C, YFR052W, YLR335W, YPR113W, YDL168W, YMR…
GO:0051179	localization	0.000565861	6.4596e-07	108	345	1462	7166	0	0	YBR069C, YNL158W, YDR135C, YCL001W, YEL009C, YOR153W, YHR024C, YMR272C, YDL092W, YLL028W, YER154W, YDR084C, YIL041W, YGL055W, YDL181W, YNL268W, YNR035C, YLR048W, YER145C, YMR054W, YMR089C, YMR072W, YNL003C, YNL323W, YMR243C, YDL224C, YKL040C, YFR051C, YLL048C, YLR335W, YDR033W, YPL271W, YBR106W, YJL212C, YPL204W, YPL134C, YKL065C, YGL008C, YOL060C, YCL025C, YBL032W, YGR234W, YLR268W, YGL077C, YLL…
GO:0051188	cofactor biosynthetic process	0.000745975	8.51569e-07	19	345	109	7166	0	0	YGR255C, YJR049C, YPR067W, YOR176W, YNL071W, YLL027W, YDL045C, YER141W, YGR277C, YGL040C, YBR003W, YDR236C, YPL059W, YOL052C, YKL184W, YKL040C, YPL135W, YDR044W, YLR153C
GO:0055085	transmembrane transport	0.00124307	1.41903e-06	41	345	390	7166	0	0	YBR069C, YGL225W, YDR135C, YNL070W, YJR077C, YLL028W, YBR068C, YNL268W, YER145C, YMR054W, YMR089C, YBR207W, YNL003C, YDL088C, YOR273C, YNR013C, YMR243C, YKL175W, YLL048C, YLR335W, YEL065W, YPL078C, YGL139W, YMR319C, YPL271W, YCR028C, YJL212C, YPL134C, YEL051W, YDR205W, YDR345C, YGL008C, YNR017W, YCL025C, YGL077C, YGR101W, YLL043W, YGR020C, YOR316C, YOR045W, YPL274W
GO:0030005	cellular di-, tri-valent inorganic cation homeostasis	0.0012696	1.44932e-06	15	345	73	7166	0	0	YER145C, YEL065W, YJR049C, YDR493W, YBR036C, YPL177C, YMR243C, YKL040C, YKL175W, YPL135W, YLR034C, YDR205W, YOR316C, YCR044C, YOL060C
GO:0055066	di-, tri-valent inorganic cation homeostasis	0.0012696	1.44932e-06	15	345	73	7166	0	0	YER145C, YEL065W, YJR049C, YDR493W, YBR036C, YPL177C, YMR243C, YKL040C, YKL175W, YPL135W, YLR034C, YDR205W, YOR316C, YCR044C, YOL060C
GO:0006810	transport	0.00170326	1.94436e-06	99	345	1334	7166	0	0	YBR069C, YDR135C, YCL001W, YEL009C, YOR153W, YHR024C, YMR272C, YDL092W, YLL028W, YER154W, YDR084C, YIL041W, YGL055W, YDL181W, YNL268W, YNR035C, YLR048W, YER145C, YMR054W, YMR089C, YNL003C, YNL323W, YMR243C, YDL224C, YFR051C, YLL048C, YLR335W, YDR033W, YPL271W, YBR106W, YJL212C, YPL204W, YPL134C, YKL065C, YGL008C, YOL060C, YCL025C, YGR234W, YLR268W, YGL077C, YLL043W, YGR206W, YPR191W, YLR034C, YGR…
GO:0006873	cellular ion homeostasis	0.00178209	2.03434e-06	20	345	126	7166	0	0	YEL065W, YJR049C, YDR493W, YDR328C, YEL051W, YDR205W, YCR044C, YOL060C, YER145C, YMR054W, YBR036C, YML016C, YPL177C, YMR243C, YKL175W, YKL040C, YPL135W, YLR034C, YGR020C, YOR316C
GO:0055082	cellular chemical homeostasis	0.00178209	2.03434e-06	20	345	126	7166	0	0	YEL065W, YJR049C, YDR493W, YDR328C, YEL051W, YDR205W, YCR044C, YOL060C, YER145C, YMR054W, YBR036C, YML016C, YPL177C, YMR243C, YKL175W, YKL040C, YPL135W, YLR034C, YGR020C, YOR316C
GO:0019725	cellular homeostasis	0.00180607	2.06173e-06	23	345	160	7166	0	0	YEL065W, YJR049C, YDR493W, YLR109W, YDR328C, YEL051W, YDR205W, YCR044C, YOL060C, YER145C, YMR054W, YBR036C, YML028W, YPL059W, YML016C, YPL177C, YMR243C, YKL175W, YKL040C, YPL135W, YLR034C, YGR020C, YOR316C
GO:0006732	coenzyme metabolic process	0.00635263	7.25186e-06	22	345	160	7166	0	0	YMR145C, YMR083W, YGR255C, YJR049C, YFR044C, YMR208W, YNL071W, YOR142W, YDL045C, YML120C, YGR277C, YBR145W, YBR003W, YDR236C, YNL037C, YOR236W, YOL052C, YDR178W, YKL184W, YMR243C, YLR153C, YLL041C
GO:0044237	cellular metabolic process	0.00766567	8.75077e-06	236	345	4103	7166	0	0	YOR179C, YPL126W, YMR083W, YNL016W, YDR099W, YER102W, YPR019W, YJL052W, YNL307C, YEL009C, YFR044C, YMR272C, YHR206W, YDL092W, YGR253C, YHR086W, YDL232W, YGR116W, YOR360C, YLL027W, YKL051W, YGR286C, YJR063W, YCL045C, YMR149W, YMR089C, YLR388W, YML028W, YNR044W, YMR243C, YKL184W, YOR362C, YCR060W, YOR221C, YOR057W, YDL188C, YPL203W, YFR052W, YLR335W, YPR113W, YDL168W, YMR145C, YLR185W, YLR452C, YPL…
GO:0044283	small molecule biosynthetic process	0.00871163	9.94478e-06	42	345	436	7166	0	0	YMR083W, YMR015C, YLR056W, YJR049C, YJL052W, YDR297W, YEL009C, YNR016C, YMR272C, YDL182W, YLL027W, YGL055W, YGR286C, YBR145W, YMR054W, YNL037C, YPL117C, YKL184W, YER091C, YOR221C, YGL012W, YDL168W, YPL078C, YPR067W, YLR028C, YPL271W, YER070W, YMR208W, YEL051W, YGL008C, YJR016C, YDL045C, YOL140W, YER003C, YDR236C, YER020W, YOR236W, YOL052C, YAL012W, YIL051C, YCR034W, YGR020C
