# Supplementary material for: In silico characterization and prediction of global protein–mRNA interactions in yeast
Source: Oxford University Press journal article supplement (doi:10.1093/nar/gkr160), 2011-04-01
Supplement: 1371415_Supplementary_Data.zip [file 1371415_Supplementary_Data.zip › Dataset_S13.txt]

"###Fission yeast targets that are predicted to be bound by mei2, csx1, meu5 and cdc5"
SPBC947.10
SPBC30D10.14
SPBPJ4664.05
SPCC1235.14
SPBC21B10.07
SPBC3B8.05
SPCC31H12.06
SPAC1805.10
SPCC553.02
SPCC569.06
SPBC660.10
SPCC4G3.08
SPAC11D3.06
SPCC2H8.02
SPAC1687.11
SPBC1683.04
SPBC13A2.03
SPAC823.11
SPAC2F3.11
SPBC1271.14
SPCC320.08
SPBC16D10.06
SPAC977.12
SPBC839.06
SPCC584.14
SPBC2D10.05
SPCC663.02
SPCC1494.03
SPCC4G3.03
SPBP8B7.13
SPCC1183.11
SPBC354.10
SPCC1020.05
SPBC1734.11
SPCC4B3.15
SPAC24H6.04
SPCC417.12
SPBC1198.02
SPAPB2B4.07
SPCC320.12
SPCC1183.10
SPBC660.06
SPCC320.05
SPBC12C2.04
SPBPB10D8.01
SPBC4F6.09
SPBP8B7.23
SPBC30D10.16
SPBC215.05
SPAC977.10
SPBC26H8.03
SPBC119.10
SPBC1709.07
