# Supplementary material for: In silico characterization and prediction of global protein–mRNA interactions in yeast
Source: Oxford University Press journal article supplement (doi:10.1093/nar/gkr160), 2011-04-01
Supplement: 1371415_Supplementary_Data.zip [file 1371415_Supplementary_Data.zip › Prediction_data.xls]

## Sheet: Dataset_S9
	ressvm
	spec	sens	acc	mcc	AUCsvm
	0.67	0.71	0.69	0.38	0.75
	0.63	0.71	0.67	0.35	0.74
	0.69	0.69	0.69	0.38	0.75
	0.63	0.74	0.68	0.37	0.75
	0.68	0.69	0.68	0.37	0.75
	0.69	0.67	0.68	0.36	0.75
	0.68	0.7	0.69	0.38	0.75
	0.68	0.69	0.68	0.37	0.75
	0.7	0.67	0.68	0.36	0.74
	0.65	0.71	0.68	0.36	0.74
	0.72	0.63	0.67	0.35	0.73
avg	0.67	0.69	0.68	0.37	0.75
	resrf
	spec	sens	acc	mcc	AUCrf
	0.7	0.7	0.7	0.4	0.78
	0.63	0.72	0.67	0.35	0.76
	0.71	0.69	0.7	0.4	0.78
	0.67	0.73	0.7	0.4	0.77
	0.69	0.7	0.69	0.39	0.77
	0.7	0.69	0.69	0.39	0.77
	0.69	0.72	0.7	0.4	0.78
	0.7	0.7	0.7	0.4	0.77
	0.71	0.66	0.68	0.37	0.76
	0.68	0.71	0.7	0.4	0.77
	0.73	0.68	0.7	0.41	0.78
avg	0.69	0.7	0.7	0.39	0.77
	SVM 5-fold cross validation using option cross in svm
	acc1	acc2	acc3	acc4	acc5	av. acc
run1	61.39	70.16	64.1	70.16	62.2	65.7
run2	60.81	67.84	65.36	68.8	62.33	65
run3	62.16	69.58	65.36	68.8	62	65.6

## Sheet: Dataset_S10
Average Mean decrease in Accuracy	Features	run1	run2	run3	run4	run5	run6	run7	run8	run9	run10
0.0084	kDa2	0.0072	0.0108	0.0083	0.0106	0.0069	0.0079	0.0085	0.0088	0.0067	0.0085
0.0083	protlength2	0.0066	0.0091	0.0073	0.0103	0.0083	0.0088	0.01	0.0076	0.0076	0.0078
0.0083	cdsAUel	0.0071	0.0087	0.0081	0.011	0.007	0.008	0.0091	0.0074	0.0071	0.0095
0.0082	lcds	0.0086	0.0079	0.0072	0.011	0.0076	0.0075	0.0091	0.0087	0.0068	0.0077
0.0081	lorf.1	0.0056	0.0091	0.0077	0.0114	0.0074	0.0077	0.0083	0.0079	0.0078	0.0084
0.0077	length.1	0.008	0.0077	0.0089	0.0103	0.0065	0.0069	0.0067	0.0067	0.0069	0.0081
0.0075	ORF.length..nt.2	0.0068	0.0085	0.006	0.0091	0.0072	0.0073	0.0076	0.0082	0.0071	0.0074
0.0075	orflength	0.0069	0.007	0.0077	0.0097	0.0065	0.0074	0.0086	0.0065	0.0073	0.0075
0.0073	lorf	0.0072	0.0067	0.0082	0.008	0.0071	0.0075	0.0074	0.0067	0.007	0.0073
0.0072	co	0.0073	0.0075	0.0068	0.009	0.0066	0.006	0.0086	0.0073	0.0066	0.0069
0.0067	I1	0.0045	0.0068	0.0087	0.0091	0.0064	0.0062	0.0066	0.0059	0.007	0.0055
0.0063	nostems	0.0073	0.0061	0.0065	0.0072	0.0052	0.0055	0.0073	0.0059	0.0056	0.0067
0.0062	G1	0.0063	0.0068	0.0056	0.0071	0.0056	0.0059	0.0078	0.0053	0.0058	0.0062
0.006	ene	0.0065	0.0056	0.007	0.007	0.0053	0.0054	0.0068	0.0062	0.005	0.0056
0.0059	LYS	0.0059	0.0052	0.0055	0.008	0.0041	0.0065	0.0062	0.0049	0.0063	0.0064
0.0058	length	0.0068	0.0056	0.0054	0.0055	0.0048	0.005	0.0063	0.0054	0.0069	0.0067
0.0058	hcont	0.0063	0.0064	0.006	0.0069	0.0048	0.005	0.0064	0.0045	0.0047	0.0067
0.0049	ASP	0.0042	0.0047	0.0077	0.0046	0.0041	0.0054	0.0056	0.0042	0.0048	0.0037
0.0049	nstems	0.0043	0.0051	0.0047	0.0041	0.0039	0.0045	0.0057	0.0043	0.006	0.0063
0.0047	V1	0.0023	0.0056	0.0049	0.0052	0.0062	0.0037	0.0048	0.0049	0.0045	0.0047
0.0046	K1	0.0045	0.0051	0.0042	0.0056	0.0042	0.0051	0.0047	0.0041	0.0039	0.005
0.0045	Ribosome.density..rb.kb.1	0.0039	0.0047	0.0056	0.0052	0.0031	0.0032	0.0064	0.0045	0.0039	0.0046
0.0044	LEU	0.005	0.0047	0.0032	0.0055	0.004	0.0052	0.0051	0.0029	0.0045	0.0042
0.004	CODON.BIAS	0.0042	0.0035	0.0038	0.0049	0.0031	0.0044	0.0046	0.0039	0.0036	0.0035
0.0039	FOP.SCORE..Frequency.of.Optimal.Codons.	0.0039	0.0031	0.0042	0.0044	0.0039	0.0033	0.0046	0.0042	0.004	0.0033
0.0036	Y1	0.0032	0.0028	0.0034	0.0051	0.0034	0.0032	0.0032	0.0038	0.0039	0.0042
0.0035	ILE	0.0033	0.0039	0.0045	0.0037	0.0032	0.0027	0.0039	0.0029	0.0038	0.0029
0.0033	N1	0.0039	0.0042	0.0034	0.0035	0.0032	0.003	0.0031	0.0035	0.0026	0.0024
0.003	P1	0.0034	0.003	0.0033	0.0029	0.0025	0.0028	0.0032	0.0035	0.0022	0.0034
0.0029	AROMATICITY.SCORE..Frequency.of.aromatic.amino.acids..Phe..Tyr..Trp.	0.0018	0.0026	0.0025	0.0046	0.0033	0.0022	0.0023	0.0024	0.0031	0.0038
0.0027	H1	0.0025	0.0022	0.0022	0.0036	0.0024	0.0025	0.0022	0.0045	0.0025	0.0024
0.0026	F1	0.0024	0.0024	0.0026	0.003	0.0029	0.0018	0.0024	0.0023	0.0031	0.0031
0.0025	L1	0.0026	0.0027	0.0024	0.0029	0.0019	0.0024	0.0025	0.0023	0.0025	0.0026
0.0023	CAI..Codon.Adaptation.Index.	0.0021	0.0016	0.0024	0.0027	0.0023	0.0019	0.0031	0.0027	0.0021	0.0023
0.0022	mRNA.level1	0.0025	0.002	0.0021	0.0021	0.0026	0.002	0.002	0.0028	0.0022	0.0019
0.0022	scont1	0.0022	0.0023	0.0019	0.0024	0.0026	0.0021	0.0022	0.0019	0.0018	0.0022
0.0021	R1	0.002	0.0028	0.0019	0.0016	0.0022	0.0023	0.0021	0.0021	0.0019	0.0023
0.0021	cdsAG	0.0021	0.0024	0.0016	0.0015	0.0027	0.0018	0.0022	0.0021	0.0032	0.0011
0.0021	chromosome1	0.0018	0.0017	0.0017	0.0019	0.002	0.0022	0.0025	0.0025	0.0023	0.0021
0.002	M1	0.0025	0.0021	0.0017	0.0022	0.0024	0.0017	0.0018	0.0018	0.0018	0.002
0.002	GRAVY.SCORE..Hydropathicity.of.Protein.	0.0014	0.0028	0.0029	0.0018	0.0015	0.0016	0.002	0.0018	0.0021	0.0022
0.002	T1	0.0017	0.0016	0.0022	0.0025	0.0022	0.0018	0.0021	0.0016	0.0026	0.0017
0.002	cdsT	0.0016	0.0018	0.0015	0.0014	0.0021	0.0024	0.0021	0.0026	0.0026	0.0017
0.002	score	0.0019	0.0021	0.0018	0.0024	0.0022	0.0018	0.0015	0.0023	0.0023	0.0014
0.0019	GLU	0.0019	0.0017	0.0019	0.0023	0.0015	0.0019	0.0022	0.0024	0.002	0.0017
0.0019	E2	0.0015	0.0022	0.0012	0.0012	0.0019	0.0018	0.0025	0.0027	0.0025	0.0015
0.0018	GLY	0.0015	0.0017	0.0019	0.0021	0.0014	0.0022	0.0021	0.002	0.0017	0.0016
0.0018	E1	0.0014	0.0017	0.0022	0.0017	0.002	0.0016	0.0019	0.0016	0.0022	0.0014
0.0017	Ribosome.occupancy1	0.0013	0.0014	0.0018	0.0015	0.0013	0.0016	0.0017	0.0017	0.0018	0.0027
0.0017	VAL	0.0016	0.0015	0.0016	0.0017	0.0013	0.0021	0.0017	0.0017	0.0014	0.002
0.0017	econt	0.0018	0.0017	0.0013	0.0013	0.0011	0.0021	0.0023	0.0014	0.0014	0.0022
0.0016	ASN	0.0019	0.0018	0.0011	0.0015	0.0013	0.0022	0.0017	0.0014	0.0015	0.002
0.0016	D1	0.0014	0.0017	0.002	0.0012	0.0009	0.0014	0.0018	0.0021	0.0016	0.0021
0.0015	D2	0.0014	0.0021	0.0021	0.0015	0.0018	0.001	0.0015	0.0009	0.0012	0.0018
0.0015	ARG	0.0014	0.0011	0.0015	0.0017	0.0012	0.0018	0.0022	0.0019	0.0014	0.001
0.0015	W1	0.0011	0.0009	0.0023	0.0016	0.0012	0.0014	0.0013	0.0015	0.0019	0.0017
0.0014	C1	0.0013	0.0008	0.0015	0.002	0.0012	0.0017	0.0017	0.0015	0.0015	0.0013
0.0014	ccont	0.0016	0.0013	0.0016	0.0013	0.0009	0.0015	0.0016	0.0013	0.0016	0.0014
0.0014	ncont1	0.0013	0.0011	0.0012	0.0011	0.0012	0.0013	0.0016	0.0024	0.0011	0.0018
0.0014	A1	0.0011	0.0014	0.0011	0.0013	0.0012	0.0014	0.0017	0.0021	0.0011	0.0015
0.0013	GLN	0.0011	0.0012	0.0016	0.0014	0.0013	0.0009	0.0015	0.0019	0.0014	0.0013
0.0013	relstems	0.0009	0.0013	0.0015	0.0017	0.0012	0.0009	0.0013	0.001	0.0016	0.0016
0.0013	cdsA	0.001	0.0016	0.0011	0.0011	0.0013	0.0012	0.0018	0.0014	0.0017	0.0007
0.0012	cdsG	0.0008	0.0012	0.0007	0.0014	0.0017	0.0018	0.0013	0.0013	0.0015	0.0005
0.0012	MOLECULAR.WEIGHT..in.Daltons.	0.001	0.0009	0.0011	0.001	0.001	0.0014	0.002	0.0014	0.001	0.0013
0.0012	K2	0.001	0.0021	0.0007	0.0008	0.0014	0.0016	0.0013	0.0012	0.0012	0.0007
0.0012	pH1	0.0009	0.0015	0.0013	0.0011	0.0009	0.0009	0.0013	0.0016	0.0011	0.0012
0.0012	PHE	0.0011	0.0016	0.0009	0.0009	0.0009	0.0015	0.0015	0.0012	0.0013	0.0009
0.0012	S1	0.0012	0.0011	0.0007	0.001	0.0011	0.0015	0.001	0.0014	0.0009	0.0018
0.0011	cdsCT	0.001	0.0012	0.0012	0.0009	0.0009	0.0009	0.0015	0.001	0.0022	0.0007
0.0011	ALA	0.0009	0.0012	0.0009	0.0012	0.0009	0.0012	0.0014	0.0015	0.0011	0.0011
0.0011	Q1	0.0011	0.0006	0.0011	0.001	0.0011	0.001	0.001	0.0021	0.001	0.0014
0.0011	pH2	0.0008	0.0013	0.001	0.0016	0.0009	0.0006	0.0012	0.0011	0.0015	0.0013
0.0011	ncont2	0.0012	0.001	0.0009	0.001	0.0008	0.0013	0.0007	0.0012	0.0015	0.001
0.001	kDa1	0.0009	0.0008	0.0011	0.0013	0.0008	0.0012	0.001	0.0014	0.0008	0.0011
0.001	protlength1	0.001	0.0007	0.0009	0.0014	0.0009	0.0017	0.0009	0.0008	0.0008	0.0012
0.001	THR	0.0009	0.0008	0.0014	0.0011	0.001	0.0015	0.001	0.0011	0.0009	0.0008
0.001	PI	0.0012	0.001	0.0012	0.0007	0.0007	0.0008	0.001	0.0016	0.0011	0.0011
0.001	PROTEIN.LENGTH	0.0007	0.0008	0.001	0.0006	0.0009	0.0011	0.0015	0.0016	0.001	0.0008
0.001	ORF.length..nt.1	0.0012	0.0006	0.0009	0.0007	0.0012	0.0011	0.0012	0.0013	0.0008	0.001
0.001	start1	0.0006	0.0007	0.0015	0.0007	0.001	0.001	0.0012	0.001	0.001	0.001
0.0009	cdsC	0.0004	0.0009	0.0011	0.0014	0.0011	0.0006	0.0012	0.0013	0.001	0.0006
0.0009	SER	0.0008	0.0011	0.0006	0.0007	0.0008	0.0011	0.0012	0.0012	0.0006	0.0012
0.0009	er1	0.0006	0.0007	0.0007	0.0014	0.0011	0.0011	0.0012	0.0009	0.0008	0.0009
0.0009	HIS	0.0007	0.0006	0.0008	0.0008	0.0009	0.0008	0.0007	0.0023	0.0008	0.0011
0.0009	F2	0.0006	0.0013	0.0007	0.0011	0.0006	0.0006	0.0007	0.0013	0.0008	0.0012
0.0009	MET	0.0006	0.0008	0.0011	0.0009	0.001	0.001	0.001	0.0007	0.001	0.001
0.0009	stop1	0.0007	0.0007	0.0019	0.0007	0.0007	0.0006	0.0007	0.0012	0.0009	0.001
0.0009	TYR	0.0007	0.0006	0.0007	0.0008	0.0007	0.0008	0.0013	0.0012	0.0012	0.001
0.0008	TRP	0.0007	0.001	0.0006	0.0011	0.0008	0.0006	0.0008	0.0007	0.0011	0.0009
0.0008	PRO	0.0011	0.0007	0.0005	0.0007	0.0006	0.0009	0.0011	0.0013	0.0006	0.0007
0.0008	Ribosome.density..rb.kb.2	0.0006	0.0008	0.0006	0.0006	0.0009	0.0005	0.0006	0.0008	0.0013	0.0009
0.0008	CYS	0.0009	0.0008	0.0007	0.0009	0.0007	0.0009	0.0005	0.0006	0.0009	0.0007
0.0007	cyto1	0.0009	0.0006	0.0008	0.0005	0.001	0.0008	0.0009	0.0005	0.0005	0.0009
0.0007	cdsCG	0.0006	0.0007	0.0013	0.0013	0.0002	0.0007	0.0007	0.0005	0.0008	0.0006
0.0007	orfstems	0.0006	0.0007	0.0008	0.001	0.0005	0.001	0.0008	0.0007	0.0005	0.0004
0.0007	GO.0006412_PROTEIN_BIOSYNTHESIS1	0.0005	0.0005	0.0005	0.0009	0.0008	0.0009	0.0009	0.0008	0.0005	0.0007
0.0007	R2	0.0008	0.0008	0.0005	0.0007	0.0006	0.0006	0.0008	0.0007	0.0008	0.0003
0.0006	strand1	0.0003	0.0005	0.0008	0.0006	0.0006	0.0006	0.0007	0.001	0.0005	0.0007
0.0006	u3A	0.0011	0.0003	0.0008	0.0007	0.0007	0.0004	0.0007	0.0004	0.0004	0.0004
0.0006	cdsAC	0.0004	0.0007	0.0003	0.0006	0.0009	0.0008	0.0007	0.0004	0.0007	0.0003
0.0006	lu3.1	0.0006	0.0006	0.0006	0.0004	0.0004	0.0004	0.0008	0.0005	0.0006	0.0008
0.0005	cdsAT	0.0003	0.0004	0.0004	0.0006	0.0004	0.0007	0.0005	0.0009	0.0007	0.0005
0.0005	X3AUel	0.0004	0.0004	0.0006	0.0005	0.0003	0.0007	0.0003	0.0009	0.0004	0.0008
0.0005	mRNA.level2	0.0003	0.0006	0.0006	0.0006	0.0009	0.0002	0.0004	0.0006	0.0006	0.0005
0.0005	lu3	0.0003	0.0006	0.0002	0.0009	0.0003	0.0005	0.0007	0.0006	0.0007	0.0004
0.0005	C2	0.0005	0.0005	0.0003	0.0008	0.0004	0.0006	0.0006	0.0006	0.0005	0.0005
0.0005	cdsTG	0.0004	0.0004	0.0004	0.0005	0.0004	0.0007	0.0008	0.0006	0.0006	0.0003
0.0005	lu5	0.0007	0.0004	0.0009	0.0003	0.0003	0.0004	0.0006	0.0004	0.0006	0.0005
0.0005	u3T	0.0006	0.0006	0.0007	0.0006	0.0004	0.0002	0.0005	0.0006	0.0004	0.0002
0.0005	mRNA.half.life.short1	0.0003	0.0003	0.0008	0.0004	0.0006	0.0005	0.0007	0.0006	0.0003	0.0002
0.0005	lu5.1	0.0004	0.0007	0.0007	0.0004	0.0004	0.0003	0.0007	0.0004	0.0004	0.0002
0.0005	T2	0.0003	0.0005	0	0.0006	0.0008	0.0004	0.0003	0.0006	0.0005	0.0005
0.0004	Ribosome.occupancy2	0.0007	0.0007	0.0003	0.0006	0.0003	0.0001	0.0003	0.0004	0.0007	0.0004
0.0004	X5AUel	0.0006	0.0004	0.0007	0.0004	0.0003	0.0005	0.0005	0	0.0004	0.0004
0.0004	nuc1	0.0004	0.0006	0.0001	0.0007	0.0004	0.0003	0.0005	0.0004	0.0005	0.0003
0.0004	S2	0.0001	0.0002	0.0003	0.0002	0.0001	0.0009	0.0003	0.0006	0.0008	0.0003
0.0004	relinstems	0.0004	0.0004	0.0003	0.0006	0.0002	0.0004	0.0003	0.0005	0.0002	0.0004
0.0003	chromosome2	0.0008	0	0.0003	0.0004	0.0003	0.0003	-0.0001	0.0002	0.0004	0.0006
0.0003	csorf	0.0001	0.0003	0.0003	0.0007	0.0001	0.0002	0.0002	0.0002	0.0002	0.0005
0.0003	M2	0.0002	0.0005	0.0002	0.0005	0.0002	0.0003	0	-0.0001	0.0005	0.0003
0.0003	N2	0.0001	0.0003	0.0005	0.0005	0.0002	0.0001	0.0005	0.0003	0.0001	0.0002
0.0003	W2	0.0001	0.0003	0.0005	0	0.0003	0.0005	0.0002	0.0003	0.0001	0.0003
0.0002	Q2	0.0002	0.0002	0.0002	0.0003	0.0003	0.0004	0.0004	-0.0001	0.0004	0.0002
0.0002	Y2	0.0001	0.0005	0.0002	0.0003	0.0002	0.0001	0.0003	0.0001	0.0002	0.0004
0.0002	V2	0.0001	0.0002	0.0002	0.0003	0.0002	0.0005	0.0001	0.0004	0.0004	-0.0001
0.0002	u5A	0.0004	0.0004	0.0001	0.0003	0.0001	0.0003	0	0.0002	0.0002	0.0002
0.0002	H2	0.0001	0.0002	0	0.0003	-0.0001	0.0002	0.0001	0.0005	0.0004	0.0003
0.0002	P2	0.0002	0.0001	0.0001	0.0007	0.0001	0.0001	0.0003	0.0002	0.0002	0.0003
0.0002	u5T	0.0002	0.0003	0.0002	0.0003	0.0001	0.0002	0.0003	0.0005	0.0002	0
0.0002	relnostems.1	0.0001	0.0004	0	0.0006	0.0002	0.0001	0.0003	0.0001	0.0003	0.0001
0.0002	scont2	0.0002	0.0005	0.0001	0.0001	0.0001	0.0002	0.0002	0.0002	0.0004	0.0002
0.0002	GO.0006350_TRANSCRIPTION1	0.0003	0.0002	0.0003	0.0002	0.0002	0.0001	0.0001	0.0002	0.0002	0.0003
0.0002	c5	0.0002	0.0002	0.0004	0.0001	0.0001	0.0002	0.0002	0.0001	0.0003	0.0003
0.0002	I2	-0.0001	0.0002	0.0001	0.0003	0.0003	0	0.0004	0.0002	0.0002	0.0003
0.0002	A2	0	0.0002	0.0002	0.0003	0.0003	0.0001	0.0001	0.0003	0.0004	0
0.0002	relnostems	0.0003	0.0005	0	0.0001	0.0002	0.0002	0.0001	0.0001	0.0003	0
0.0002	u3AG	0.0001	0.0001	0.0002	0.0002	0.0003	0.0001	0.0001	0.0001	0.0003	0.0003
0.0002	G2	0.0002	0.0002	0	0.0002	0.0002	0.0001	0.0003	0.0003	0.0003	0.0002
0.0002	u3G	-0.0002	0.0003	0.0003	-0.0001	0.0001	0.0001	0.0002	0.0003	0.0005	0.0001
0.0002	L2	0.0005	0.0001	0	0.0003	0	0.0001	0.0003	0.0002	0	0
0.0001	First.intron.GC2	0.0001	0.0002	0.0002	0.0001	0.0001	0.0001	0.0001	0.0002	0.0003	0.0002
0.0001	stop2	0.0002	0.0003	0	0.0005	0.0001	0	0.0003	-0.0002	0	0.0002
0.0001	u3C	-0.0001	0.0003	-0.0001	0.0002	0.0001	0.0005	0.0004	0	0.0001	0
0.0001	u3AT	0.0001	0.0001	0.0001	0.0002	0.0001	0.0001	0.0003	-0.0001	0.0001	0.0003
0.0001	u5G	-0.0002	0.0003	0.0003	0.0003	-0.0001	0.0001	-0.0001	0.0003	0.0002	0
0.0001	u3CT	0.0001	0.0003	0.0003	0.0001	-0.0001	0	0	0.0002	0.0003	0.0002
0.0001	c3	0.0003	-0.0001	0	0	0.0001	0.0002	0.0003	0.0001	0	0.0001
0.0001	halflife	0	0.0005	0	-0.0001	0.0002	0.0003	0	0	0	0.0002
0.0001	start2	0.0004	0.0002	-0.0001	0.0003	-0.0002	0.0004	-0.0002	0	0.0001	0
0.0001	u5AC	0	0.0001	0	0.0001	0.0002	0.0001	-0.0001	0.0003	0.0002	0
0.0001	Number.of.introns2	0	0.0001	0.0001	0	0.0001	0.0001	0.0001	0.0001	0.0001	0.0002
0.0001	First.intron.length2	0	0.0001	0	0.0001	0.0001	0.0001	0.0001	0.0001	0.0002	0.0002
0.0001	u5C	0.0001	0	-0.0001	0.0001	0.0002	-0.0002	0	0.0004	0.0001	0.0001
0.0001	X5stems	0	0.0002	-0.0001	0.0003	0.0001	-0.0002	0	0.0003	0.0001	-0.0001
0.0001	GO.0008150_BIOLOGICAL_PROCESS1	0	0.0001	0	0.0001	0.0001	0.0001	0.0001	0.0001	0.0001	0.0001
0.0001	u3CG	0.0002	0.0002	0	0	-0.0001	0.0001	0	0.0001	-0.0001	0.0002
0.0001	er2	0.0001	-0.0001	0	0	0.0002	0	0.0001	0.0001	0.0001	-0.0001
0	GO.0006412_PROTEIN_BIOSYNTHESIS2	0	0	0	0.0001	0.0001	0.0001	0	0	0	0
0	nuc2	-0.0001	0	0.0001	0	0	0	0	0.0001	0.0003	0
0	mito2	0	0.0001	0	0	0.0001	0.0001	0.0001	0	0.0001	0.0001
0	u3TG	0	0.0003	-0.0002	0.0001	-0.0002	0.0001	0.0002	0.0003	-0.0001	0
0	cs5	0.0002	0	0	-0.0002	-0.0003	0.0002	0	0	0.0002	0.0003
0	GO.0008150_BIOLOGICAL_PROCESS2	0.0001	0.0001	0	0.0001	0	0	0	0	0	0
0	GO.0006810_TRANSPORT1	0	0	0	0	0	0	0.0001	0	0.0001	0
0	GO.0016070_RNA_METABOLISM1	0	0	0.0001	0	0	0	0	0	0.0001	0
0	u5AT	-0.0002	0.0003	0.0001	0.0001	-0.0003	0.0001	0	0	0.0002	-0.0001
0	u5AG	-0.0002	0.0001	0	0.0001	-0.0001	0.0001	0.0002	0.0002	-0.0001	-0.0001
0	u5CT	0.0001	-0.0002	-0.0002	0.0002	0.0002	0.0001	-0.0001	0	0	0.0001
0	mRNA.half.life.short2	-0.0001	0	0.0001	0	0	0	0	0	0.0001	0
0	GO.0006810_TRANSPORT2	0	0	0	0	0	0	0	0.0001	0	0
0	cyto2	0	-0.0001	0.0002	0	-0.0001	0.0001	0	0	0	0
0	GO.0006350_TRANSCRIPTION2	0	0	0	0	0	0	0.0001	0.0001	0.0001	0
0	Number.of.introns1	0	0	0	0	0	0	0	0	0	0
0	First.intron.length1	0	0	0	0	0	0	0	0	0	0
0	First.intron.GC1	0	0	0	0	0	0	0	0	0	0
0	cs3	-0.0003	0.0001	-0.0001	-0.0001	-0.0001	0	0.0003	0	-0.0001	0.0003
0	GO.0016070_RNA_METABOLISM2	0	0	0	0	0	0	0	0	0	0
0	GO.0007165_SIGNAL_TRANSDUCTION2	-0.0001	0	0	0	0	0	0	0	0	0
0	gen	0	0	0	0	0	0	0	0	0	0
0	GO.0007049_CELL_CYCLE2	0	0	0	0	0	0	0	0	0	0
0	tfcode2	0	0	0	0	0	0	0	0	0	0
0	vac2	0	0	0	0	0	0	0	0	0	0
0	strand2	-0.0001	0	0	0	-0.0001	0	0	0.0001	-0.0001	0
0	X3stems	0.0001	-0.0001	-0.0001	0	-0.0001	-0.0001	0	0.0002	0.0001	-0.0001
-0.0001	u3AC	0	0.0002	0	-0.0001	0	-0.0001	0	-0.0001	-0.0001	-0.0003
-0.0001	u5CG	0.0001	0	0	-0.0002	-0.0002	0.0001	0.0001	-0.0001	-0.0002	-0.0002
-0.0001	u5TG	0	-0.0001	0	-0.0002	-0.0002	-0.0002	-0.0002	0	0.0001	0.0001

## Sheet: leaveprotout_Hogancomp
### Leave protein out tests
Accuracy	protein	tn	fn	fp	tp	spec	sens	acc		pairs in training	tn+fp
0.75	YKL214C	2	1	0	1	1	0.5	0.75	1	2	2	YKL214C	Yra2	1 RRM	cytoplasm,nucleus	1310	mRNA export from nucleus
0.708333	YKL130C	10	5	2	7	0.833333	0.583333	0.708333	1	12	12	YKL130C	She2		cytoplasm,nucleus	4070	part of mRNA localization machinery that restricts accumulation of certain proteins to the bud
0.640082	YDR432W	355	218	134	271	0.725971	0.554192	0.640082	1	489	489	YDR432W	Npl3	2 RRM	nucleus	78700	mRNA export from nucleus; antagonist of mRNA 3' end formation by RNA polymerase II; preferenitally binds intron-containing transcripts
0.636364	YLL032C	16	10	6	12	0.727273	0.545455	0.636364	1	22	22	YLL032c	Yll032c	1 KH	cytoplasm	922	protein of unknown function that may interact with ribosomes
0.630631	YPL190C	62	33	49	78	0.558559	0.702703	0.630631	1	111	111	YPL190C	Nab3	1 RRM	nucleus	5830	transcription termination and 3' end maturation of nonpolyadenylated RNA pol II transcribed RNAs
0.606762	YGR159C	164	104	117	177	0.58363	0.629893	0.606762	1	281	281	YGR159C	Nsr1	2 RRM	nucleolus	77400	pre-rRNA processing and ribosome biogenesis
0.60355	YPL184C	85	50	84	119	0.502959	0.704142	0.60355	1	169	169	YPL184C	MRN1	3 RRM	cytoplasm	7950	protein of unknown function
0.570536	YOR198C	330	250	231	309	0.588235	0.552773	0.570536	1	559	561	YOR198C	Bfr1		ER	33400	associated with polyribosomes; implicated in secretion and nuclear segregation; physically interacts with Scp160.
0.541667	YML117W	17	15	7	9	0.708333	0.375	0.541667	1	24	24	YML117W	Nab6	1 RRM	cytoplasm	1540	putative RNA-binding protein, based on computational analysis of large-scale protein-protein interaction data
0.522146	YNL016W	452	416	350	385	0.563591	0.480649	0.522146	1	801	802	YNL016W	Pub1	3 RRM	cytoplasm	49600	required for stability of a number of mRNAs; not reported to associate with polyribosomes; preferentially associated with mRNAs encoding proteins localized to membranes and cytoplasmic ribosome
0.508065	YPR042C	49	48	13	14	0.790323	0.225806	0.508065	1	62	62	YPR042C	Puf2	5 PUF, 1 RRM	cytoplasm	377	Preferentially binds mRNAs encoding membrane-associated proteins
0.5	YIR001C	1	1	1	1	0.5	0.5	0.5	1	2	2	YIR001C	Sgn1	1 RRM,	cytoplasm	6490	may have a role in mRNA translation, as suggested by genetic interactions with genes encoding proteins involved in translational initiation
0.5	YNL037C	0	0	1	1	0	1	0.5	1	1	1	YNL037C	Idh1		mitochondrion	10500	subunit of mitochondrial isocitrate dehydrogenase
0.5	YDL167C	0	0	1	1	0	1	0.5	1	1	1	YDL167C	Nrp1	2 RRM	cytoplasm	3570	rich in asparagine residues
0.5	YLR116W	0	0	27	27	0	1	0.5	1	27	27	YLR116W	Msl5	1 KH, 2 zf-CCHC	nucleus	4380	pre-mRNA splicing; also involved in nuclear retention of pre-mRNA
0.497193	YER165W	573	577	229	224	0.714464	0.27965	0.497193	0	801	802	YER165W	Pab1	4 RRM, 1 PABP	cytoplasm	198000	poly(A) binding protein, part of the 3'-end RNA-processing complex, mediates interactions between the 5' cap structure and the 3' mRNA poly(A) tail
0.492308	YGL178W	0	1	65	64	0	0.984615	0.492308	0	65	65	YGL178W	Puf5	8 PUF	cytoplasm	1240	preferentially binds mRNAs encoding chromatin modifiers and spindle pole body components; involved in longevity and maintenance of cell wall integrity
0.490515	YBL032W	112	115	73	69	0.605405	0.375	0.490515	0	184	185	YBL032W	Khd1	3 KH	cytoplasm	15600	required for the proper translational repression and localization of ASH1 mRNA to bud-tip
0.483824	YNL251C	181	192	159	148	0.532353	0.435294	0.483824	0	340	340
0.47619	YDR293C	11	12	10	9	0.52381	0.428571	0.47619	0	21	21	YDR293C	Ssd1	1 OB_RNB, 1 RNB	cytoplasm	1100	involved in cell wall biogenesis and integrity, longevity, virulance
0.409091	YNL004W	3	5	8	6	0.272727	0.545455	0.409091	0	11	11	YNL004W	Hrb1	3 RRM	nucleus	1990	mRNA export from nucleus; binds mRNAs cotranscriptionally; found in polysome fractions
0.401575	YLR197W	77	102	50	25	0.606299	0.19685	0.401575	0	127	127	YLR197W	Nop56	1 NOP5NT, 1 NOSIC, 1 Nop	nucleolus	13500	component of the box C/D small nucleolar ribonucleoprotein particles
0.389011	YJL080C	289	440	394	242	0.423133	0.354839	0.389011	0	682	683	YJL080C	Scp160	7 KH	ER	NA	essential RNA-binding G protein effector of mating response pathway; interacts in mRNA-dependent manner with translating ribosomes; physically interacts with Bfr1.
0.386792	YOR359W	24	36	29	17	0.45283	0.320755	0.386792	0	53	53	YOR359W	Vts1	1 SAM	cytoplasm	3200	capable of binding Smaug response element stem-loop RNA to negatively regulate translation
0.384956	YGL014W	54	80	59	33	0.477876	0.292035	0.384956	0	113	113	YGL014W	Puf4	8 PUF	cytoplasm	721	preferentially binds mRNAs encoding nucleolar ribosomal RNA-processing factors
0.377193	YLR175W	32	46	25	11	0.561404	0.192982	0.377193	0	57	57	YLR175W	Cbf5	1 DKCLD, 1 TruB_N, 1, PUA	nucleolus	33600	pseudouridine synthase catalytic subunit of box H/ACA small nucleolar ribonucleoprotein particles
0.358333	YPL178W	29	46	31	14	0.483333	0.233333	0.358333	0	60	60	YGL178W	Puf5	8 PUF	cytoplasm	1240	preferentially binds mRNAs encoding chromatin modifiers and spindle pole body components; involved in longevity and maintenance of cell wall integrity
0.355422	YCL011C	45	69	38	14	0.542169	0.168675	0.355422	0	83	83	YCL011C	Gbp2	3 RRM	nucleus	2540	mRNA export from nucleus; binds mRNAs cotranscriptionally; found in polysome fractions
0.2	YLR398C	2	5	3	0	0.4	0	0.2	0	5	5	YLR398C	Ski2	1 DEAD, 1 HelicaseC	cytoplasm	5770	involved in exosome mediated 3' to 5' mRNA degradation and translation inhibition of non-poly(A) mRNAs
0	YFL023W	0	1	1	0	0	0	0	0	1	1	YFL023W	Bud27		cytoplasm	1300	bud-site selection, nutrient signaling, and gene expression controlled by the TOR kinase
						tn/tn+fp	tp/tp+fn	tp+tn/tot
	predav	tn	fn	fp	tp	spec	sens	acc
					average	0.506138	0.488345	0.49726
					part. Average	0.538814	0.623596	0.581209
