# Supplementary material for: In silico characterization and prediction of global protein–mRNA interactions in yeast
Source: Oxford University Press journal article supplement (doi:10.1093/nar/gkr160), 2011-04-01
Supplement: 1371415_Supplementary_Data.zip [file 1371415_Supplementary_Data.zip › Supporting_Table_S1.csv]

### Abbreviations used in the figures,,,
Type of feature,Abbreviation,Description,Source
Gene Ontology,TF,Transcription factor: union of GO:003704 and GO:0003700,http://www.yeastgenome.org/
Gene Ontology Superlsim,GO RNA metabolism,GO:0016070 RNA metabolism,http://www.yeastgenome.org/
Gene Ontology Superlsim,GO prot. Biosynt.,GO:0006412 Protein biosynthesis,http://www.yeastgenome.org/
Gene Ontology Superlsim,GO transcription,GO:0006350 Transcription,http://www.yeastgenome.org/
Gene Ontology Superlsim,GO transport,GO:0006810 Transport,http://www.yeastgenome.org/
Gene Ontology Superlsim,GO DNA metabolism,GO:0006259 DNA metabolism,http://www.yeastgenome.org/
Gene Ontology Superlsim,GO Mitochon.,GO:0007005 Mitochondrion organization & biogenesis,http://www.yeastgenome.org/
Gene Ontology Superlsim,GO cell cycle,GO:0007049 Cell cycle,http://www.yeastgenome.org/
Gene Ontology Superlsim,GO signalling,GO:0007165 Signal transduction,http://www.yeastgenome.org/
Gene Ontology Superlsim,GO bioprocess,GO:0008150 Biological process,http://www.yeastgenome.org/
Gene Ontology Superlsim,GO metabolism,GO:0044238 Primary metabolism,http://www.yeastgenome.org/
Genetic interactions,gen,Pair has a known genetic interaction,http://thebiogrid.org/
Genome position,chromosome,Chromosome on which the gene is encoded,http://www.yeastgenome.org/
Genome position,genomic strand,Strand where the gene is encoded,http://www.yeastgenome.org/
Genome position,chromo. Start coord.,Start coordinate,http://www.yeastgenome.org/
Genome position,chromo stop coord,Stop coordinate,http://www.yeastgenome.org/
Introns,no. introns,Number of introns in the transcript,"Yassour M, et al. 2009. Ab initio construction of a eukaryotic transcriptome by massively parallel mRNA sequencing. Proceedings of the National Academy of Sciences 106: 3264-3269."
Introns,First intron GC ,First intron GC content,Calculated
Introns,First intron length,First intron length,Calculated
Length,kDa,Protein mass in KiloDaltons,http://www.yeastgenome.org/
Length,length,Length of the protein,http://www.yeastgenome.org/
Localization,Local. Vacuole,Protein localizes to the vacuole or vacuolar membrane,"Huh W-K, Falvo JV, Gerke LC, Carroll AS, Howson RW, Weissman JS, O'Shea EK. 2003. Global analysis of protein localization in budding yeast. Nature 425: 686-691."
Localization,Local. Cytoplasm,"Protein localizes to the cyto cell periphery,bud, bud neck, cytoskel. crotub,cytopl","Huh W-K, Falvo JV, Gerke LC, Carroll AS, Howson RW, Weissman JS, O'Shea EK. 2003. Global analysis of protein localization in budding yeast. Nature 425: 686-691."
Localization,Local. Nucleus,Protein localization to the nucleus,"Huh W-K, Falvo JV, Gerke LC, Carroll AS, Howson RW, Weissman JS, O'Shea EK. 2003. Global analysis of protein localization in budding yeast. Nature 425: 686-691."
Localization,Local. End. Ret.,Protein localizes to the endolplasmic reticulum,"Huh W-K, Falvo JV, Gerke LC, Carroll AS, Howson RW, Weissman JS, O'Shea EK. 2003. Global analysis of protein localization in budding yeast. Nature 425: 686-691."
mRNA structure,stem density,Proportion of paired base pairs in the transcript,http://rna.tbi.univie.ac.at/cgi-bin/RNAfold.cgi
mRNA structure,mRNA fold. energy,Predicted folding energy of the transcript,http://rna.tbi.univie.ac.at/cgi-bin/RNAfold.cgi
mRNA structure,nostems,Number of stems in the predicted mRNA secondary structure,http://rna.tbi.univie.ac.at/cgi-bin/RNAfold.cgi
mRNA structure,3stems,Relative number of predicted stems in 5' UTR,http://rna.tbi.univie.ac.at/cgi-bin/RNAfold.cgi
mRNA structure,5stems,Relative number of predicted stems in 3' UTR,http://rna.tbi.univie.ac.at/cgi-bin/RNAfold.cgi
mRNA structure,orfstems,Relative number of predicted stems in the ORF,http://rna.tbi.univie.ac.at/cgi-bin/RNAfold.cgi
mRNA structure,c3,Number of predicted stems in 3' UTR,http://rna.tbi.univie.ac.at/cgi-bin/RNAfold.cgi
mRNA structure,c5,Number of predicted stems in 5' UTR,http://rna.tbi.univie.ac.at/cgi-bin/RNAfold.cgi
mRNA structure,co,Number of predicted stems in ORF,http://rna.tbi.univie.ac.at/cgi-bin/RNAfold.cgi
mRNA structure,score,PARS score from Kertesz et al. 2010 averaged over whole mRNA,"Michael Kertesz, Yue Wan, Elad Mazor, John L.Rinn, Robert C.Nutter, Howard Y.Chang, Eran Segal Nature 467, 103-107 "
Protein physical properties,"TRP,VAL, etc...",Absolute amount of each amino acid in the protein,http://www.yeastgenome.org/
Protein physical properties,"A,Y,L, etc...",Relative amount of each amino acid in the protein,Calculated
Protein physical properties,nitrogen content,Nitrogen content of protein,Calculated
Protein physical properties,sulphur content,Sulphur content of the protein,Calculated
Protein physical properties,coils in struc,Relative amount of Coils in protein predicted structure,http://bioinf.cs.ucl.ac.uk/psipred/
Protein physical properties,strands in struc.,Relative amount of Beta strands in protein predicted structure,http://bioinf.cs.ucl.ac.uk/psipred/
Protein physical properties,helix in struc.,Relative amount of helices in protein predicted structure,http://bioinf.cs.ucl.ac.uk/psipred/
Protein physical properties,isoelectri point "IP" "	Isoelectric point of the protein	http://www.yeastgenome.org/"
Protein physical properties,hydrooathicity,Gravy score of hydropathicity "from hydrophilic to hydrophobic" "	http://www.yeastgenome.org/"
Protein physical properties,aromaticity,Frequency.of.aromatic.amino.acids..Phe..Tyr..Trp.,http://www.yeastgenome.org/
Translation,ribosome density,Ribosome density,"Arava Y, Wang Y, Storey JD, Liu CL, Brown PO, Herschlag D. 2003. Genome-wide analysis of mRNA translation profiles in Saccharomycescerevisiae. Proceedings of the National Academy of Sciences of the United States of America 100: 3889-3894."
Translation,mRNA level,Expression level,"Arava Y, Wang Y, Storey JD, Liu CL, Brown PO, Herschlag D. 2003. Genome-wide analysis of mRNA translation profiles in Saccharomycescerevisiae. Proceedings of the National Academy of Sciences of the United States of America 100: 3889-3894."
Translation,mRNA halflife,Class of mRNA hallife,"Beilharz TH, Preiss T. 2009. Transcriptome-wide measurement of mRNA polyadenylation state. Methods 48: 294-300."
Translation,codon bias,Codon bias,http://www.yeastgenome.org/
Translation,Frequency of optimal codons,Frequency of optimal codons,http://www.yeastgenome.org/
Translation,Codon Adaptation Index,Codon Adaptation Index,http://www.yeastgenome.org/
UTR,3' UTR A cont.,Relative amount of Adenine in 3' UTR,Calculated
UTR,3' UTR Tcont.,Relative amount of Thymine in 3' UTR,Calculated
UTR,3' UTR C cont.,Relative amount of Cytosine in 3' UTR,Calculated
UTR,3' UTR G cont.,Relative amount of Guanine in 3' UTR,Calculated
UTR,5' UTR A cont.,Relative amount of Adenine in 5' UTR,Calculated
UTR,5' UTR T cont.,Relative amount of Thiamine in 5' UTR,Calculated
UTR,5' UTR C cont.,Relative amount of Cytosine in 5' UTR,Calculated
UTR,5' UTR G cont.,Relative amount of Guanine in 5' UTR,Calculated
UTR,"uAC, uAT, ...",Occurrence of dinucleotides divided by mRNA length,Calculated
UTR,3' UTR length,3' UTR length divided by total mRNA length,"Calculated from Michael Kertesz, Yue Wan, Elad Mazor, John L.Rinn, Robert C.Nutter, Howard Y.Chang, Eran Segal Nature 467, 103-107 "
UTR,3' UTR rel. length,3' UTR length divided by total mRNA length,"Calculated from Michael Kertesz, Yue Wan, Elad Mazor, John L.Rinn, Robert C.Nutter, Howard Y.Chang, Eran Segal Nature 467, 103-107 "
UTR,5' UTR length,5' UTR length,"Calculated from Michael Kertesz, Yue Wan, Elad Mazor, John L.Rinn, Robert C.Nutter, Howard Y.Chang, Eran Segal Nature 467, 103-107 "
UTR,5' UTR rel. length,5' UTR length divided by total mRNA length,"Calculated from Michael Kertesz, Yue Wan, Elad Mazor, John L.Rinn, Robert C.Nutter, Howard Y.Chang, Eran Segal Nature 467, 103-107 "
CDS,lcds,CDS length,Calculated
CDS,cdsA,Relative amounts of bases in Coding Sequence,Calculated
CDS,cdsC,Relative amounts of bases in Coding Sequence,Calculated
CDS,cdsT,Relative amounts of bases in Coding Sequence,Calculated
CDS,cdsG,Relative amounts of bases in Coding Sequence,Calculated
CDS,cdsAC,Occurrence of dinucleotides in CDS divided by length,Calculated
CDS,cdsAT,Occurrence of dinucleotides in CDS divided by length,Calculated
CDS,cdsAG,Occurrence of dinucleotides in CDS divided by length,Calculated
CDS,cdsCT,Occurrence of dinucleotides in CDS divided by length,Calculated
CDS,cdsCG,Occurrence of dinucleotides in CDS divided by length,Calculated
CDS,cdsTG,Occurrence of dinucleotides in CDS divided by length,Calculated
statistics of PARS score,CDS_AVG,Statistics of PARS score in CDS,"Calculated by Christine Vogel from Michael Kertesz, Yue Wan, Elad Mazor, John L.Rinn, Robert C.Nutter, Howard Y.Chang, Eran Segal Nature 467, 103-107 "
statistics of PARS score,CDS_SDV,Statistics of PARS score in CDS,"Calculated by Christine Vogel from Michael Kertesz, Yue Wan, Elad Mazor, John L.Rinn, Robert C.Nutter, Howard Y.Chang, Eran Segal Nature 467, 103-107 "
statistics of PARS score,CDS_RELSTDEV,Statistics of PARS score in CDS,"Calculated by Christine Vogel from Michael Kertesz, Yue Wan, Elad Mazor, John L.Rinn, Robert C.Nutter, Howard Y.Chang, Eran Segal Nature 467, 103-107 "
statistics of PARS score,CDS_LN,Statistics of PARS score in CDS,"Calculated by Christine Vogel from Michael Kertesz, Yue Wan, Elad Mazor, John L.Rinn, Robert C.Nutter, Howard Y.Chang, Eran Segal Nature 467, 103-107 "
statistics of PARS score,CDS_MIN,Statistics of PARS score in CDS,"Calculated by Christine Vogel from Michael Kertesz, Yue Wan, Elad Mazor, John L.Rinn, Robert C.Nutter, Howard Y.Chang, Eran Segal Nature 467, 103-107 "
statistics of PARS score,CDS_Q25,Statistics of PARS score in CDS,"Calculated by Christine Vogel from Michael Kertesz, Yue Wan, Elad Mazor, John L.Rinn, Robert C.Nutter, Howard Y.Chang, Eran Segal Nature 467, 103-107 "
statistics of PARS score,CDS_MEDIAN,Statistics of PARS score in CDS,"Calculated by Christine Vogel from Michael Kertesz, Yue Wan, Elad Mazor, John L.Rinn, Robert C.Nutter, Howard Y.Chang, Eran Segal Nature 467, 103-107 "
statistics of PARS score,CDS_Q75,Statistics of PARS score in CDS,"Calculated by Christine Vogel from Michael Kertesz, Yue Wan, Elad Mazor, John L.Rinn, Robert C.Nutter, Howard Y.Chang, Eran Segal Nature 467, 103-107 "
statistics of PARS score,CDS_MAX,Statistics of PARS score in CDS,"Calculated by Christine Vogel from Michael Kertesz, Yue Wan, Elad Mazor, John L.Rinn, Robert C.Nutter, Howard Y.Chang, Eran Segal Nature 467, 103-107 "
statistics of PARS score,CDS_FIRST10_AVG,Statistics of PARS score in CDS,"Calculated by Christine Vogel from Michael Kertesz, Yue Wan, Elad Mazor, John L.Rinn, Robert C.Nutter, Howard Y.Chang, Eran Segal Nature 467, 103-107 "
statistics of PARS score,CDS_FIRST10_SDV,Statistics of PARS score in CDS,"Calculated by Christine Vogel from Michael Kertesz, Yue Wan, Elad Mazor, John L.Rinn, Robert C.Nutter, Howard Y.Chang, Eran Segal Nature 467, 103-107 "
statistics of PARS score,CDS_FIRST10_RELSDV,Statistics of PARS score in CDS,"Calculated by Christine Vogel from Michael Kertesz, Yue Wan, Elad Mazor, John L.Rinn, Robert C.Nutter, Howard Y.Chang, Eran Segal Nature 467, 103-107 "
statistics of PARS score,CDS_LAST10_AVG,Statistics of PARS score in CDS,"Calculated by Christine Vogel from Michael Kertesz, Yue Wan, Elad Mazor, John L.Rinn, Robert C.Nutter, Howard Y.Chang, Eran Segal Nature 467, 103-107 "
statistics of PARS score,CDS_LAST10_SDV,Statistics of PARS score in CDS,"Calculated by Christine Vogel from Michael Kertesz, Yue Wan, Elad Mazor, John L.Rinn, Robert C.Nutter, Howard Y.Chang, Eran Segal Nature 467, 103-107 "
statistics of PARS score,CDS_LAST10_RELSDV,Statistics of PARS score in CDS,"Calculated by Christine Vogel from Michael Kertesz, Yue Wan, Elad Mazor, John L.Rinn, Robert C.Nutter, Howard Y.Chang, Eran Segal Nature 467, 103-107 "
statistics of PARS score,X5UTR_AVG,Statistics of PARS score in 5'UTR,"Calculated by Christine Vogel from Michael Kertesz, Yue Wan, Elad Mazor, John L.Rinn, Robert C.Nutter, Howard Y.Chang, Eran Segal Nature 467, 103-107 "
statistics of PARS score,X5UTR_SDV,Statistics of PARS score in 5'UTR,"Calculated by Christine Vogel from Michael Kertesz, Yue Wan, Elad Mazor, John L.Rinn, Robert C.Nutter, Howard Y.Chang, Eran Segal Nature 467, 103-107 "
statistics of PARS score,X5UTR_RELSTDEV,Statistics of PARS score in 5'UTR,"Calculated by Christine Vogel from Michael Kertesz, Yue Wan, Elad Mazor, John L.Rinn, Robert C.Nutter, Howard Y.Chang, Eran Segal Nature 467, 103-107 "
statistics of PARS score,X5UTR_LN,Statistics of PARS score in 5'UTR,"Calculated by Christine Vogel from Michael Kertesz, Yue Wan, Elad Mazor, John L.Rinn, Robert C.Nutter, Howard Y.Chang, Eran Segal Nature 467, 103-107 "
statistics of PARS score,X5UTR_MIN,Statistics of PARS score in 5'UTR,"Calculated by Christine Vogel from Michael Kertesz, Yue Wan, Elad Mazor, John L.Rinn, Robert C.Nutter, Howard Y.Chang, Eran Segal Nature 467, 103-107 "
statistics of PARS score,X5UTR_Q25,Statistics of PARS score in 5'UTR,"Calculated by Christine Vogel from Michael Kertesz, Yue Wan, Elad Mazor, John L.Rinn, Robert C.Nutter, Howard Y.Chang, Eran Segal Nature 467, 103-107 "
statistics of PARS score,X5UTR_MEDIAN,Statistics of PARS score in 5'UTR,"Calculated by Christine Vogel from Michael Kertesz, Yue Wan, Elad Mazor, John L.Rinn, Robert C.Nutter, Howard Y.Chang, Eran Segal Nature 467, 103-107 "
statistics of PARS score,X5UTR_Q75,Statistics of PARS score in 5'UTR,"Calculated by Christine Vogel from Michael Kertesz, Yue Wan, Elad Mazor, John L.Rinn, Robert C.Nutter, Howard Y.Chang, Eran Segal Nature 467, 103-107 "
statistics of PARS score,X5UTR_MAX,Statistics of PARS score in 5ﾃ??UTR,"Calculated by Christine Vogel from Michael Kertesz, Yue Wan, Elad Mazor, John L.Rinn, Robert C.Nutter, Howard Y.Chang, Eran Segal Nature 467, 103-107 "
statistics of PARS score,X5UTR_FIRST10_AVG,Statistics of PARS score in 5'UTR,"Calculated by Christine Vogel from Michael Kertesz, Yue Wan, Elad Mazor, John L.Rinn, Robert C.Nutter, Howard Y.Chang, Eran Segal Nature 467, 103-107 "
statistics of PARS score,X5UTR_FIRST10_SDV,Statistics of PARS score in 5'UTR,"Calculated by Christine Vogel from Michael Kertesz, Yue Wan, Elad Mazor, John L.Rinn, Robert C.Nutter, Howard Y.Chang, Eran Segal Nature 467, 103-107 "
statistics of PARS score,X5UTR_FIRST10_RELSDV,Statistics of PARS score in 5'UTR,"Calculated by Christine Vogel from Michael Kertesz, Yue Wan, Elad Mazor, John L.Rinn, Robert C.Nutter, Howard Y.Chang, Eran Segal Nature 467, 103-107 "
statistics of PARS score,X5UTR_LAST10_AVG,Statistics of PARS score in 5'UTR,"Calculated by Christine Vogel from Michael Kertesz, Yue Wan, Elad Mazor, John L.Rinn, Robert C.Nutter, Howard Y.Chang, Eran Segal Nature 467, 103-107 "
statistics of PARS score,X5UTR_LAST10_SDV,Statistics of PARS score in 5'UTR,"Calculated by Christine Vogel from Michael Kertesz, Yue Wan, Elad Mazor, John L.Rinn, Robert C.Nutter, Howard Y.Chang, Eran Segal Nature 467, 103-107 "
statistics of PARS score,X5UTR_LAST10_RELSDV,Statistics of PARS score in 5'UTR,"Calculated by Christine Vogel from Michael Kertesz, Yue Wan, Elad Mazor, John L.Rinn, Robert C.Nutter, Howard Y.Chang, Eran Segal Nature 467, 103-107 "
statistics of PARS score,X3UTR_AVG,Statistics of PARS score in 3'UTR,"Calculated by Christine Vogel from Michael Kertesz, Yue Wan, Elad Mazor, John L.Rinn, Robert C.Nutter, Howard Y.Chang, Eran Segal Nature 467, 103-107 "
statistics of PARS score,X3UTR_SDV,Statistics of PARS score in 3'UTR,"Calculated by Christine Vogel from Michael Kertesz, Yue Wan, Elad Mazor, John L.Rinn, Robert C.Nutter, Howard Y.Chang, Eran Segal Nature 467, 103-107 "
statistics of PARS score,X3UTR_RELSTDEV,Statistics of PARS score in 3'UTR,"Calculated by Christine Vogel from Michael Kertesz, Yue Wan, Elad Mazor, John L.Rinn, Robert C.Nutter, Howard Y.Chang, Eran Segal Nature 467, 103-107 "
statistics of PARS score,X3UTR_LN,Statistics of PARS score in 3'UTR,"Calculated by Christine Vogel from Michael Kertesz, Yue Wan, Elad Mazor, John L.Rinn, Robert C.Nutter, Howard Y.Chang, Eran Segal Nature 467, 103-107 "
statistics of PARS score,X3UTR_MIN,Statistics of PARS score in 3'UTR,"Calculated by Christine Vogel from Michael Kertesz, Yue Wan, Elad Mazor, John L.Rinn, Robert C.Nutter, Howard Y.Chang, Eran Segal Nature 467, 103-107 "
statistics of PARS score,X3UTR_Q23,Statistics of PARS score in 3'UTR,"Calculated by Christine Vogel from Michael Kertesz, Yue Wan, Elad Mazor, John L.Rinn, Robert C.Nutter, Howard Y.Chang, Eran Segal Nature 467, 103-107 "
statistics of PARS score,X3UTR_MEDIAN,Statistics of PARS score in 3'UTR,"Calculated by Christine Vogel from Michael Kertesz, Yue Wan, Elad Mazor, John L.Rinn, Robert C.Nutter, Howard Y.Chang, Eran Segal Nature 467, 103-107 "
statistics of PARS score,X3UTR_Q73,Statistics of PARS score in 3'UTR,"Calculated by Christine Vogel from Michael Kertesz, Yue Wan, Elad Mazor, John L.Rinn, Robert C.Nutter, Howard Y.Chang, Eran Segal Nature 467, 103-107 "
statistics of PARS score,X3UTR_MAX,Statistics of PARS score in 3'UTR,"Calculated by Christine Vogel from Michael Kertesz, Yue Wan, Elad Mazor, John L.Rinn, Robert C.Nutter, Howard Y.Chang, Eran Segal Nature 467, 103-107 "
statistics of PARS score,X3UTR_FIRST10_AVG,Statistics of PARS score in 3'UTR,"Calculated by Christine Vogel from Michael Kertesz, Yue Wan, Elad Mazor, John L.Rinn, Robert C.Nutter, Howard Y.Chang, Eran Segal Nature 467, 103-107 "
statistics of PARS score,X3UTR_FIRST10_SDV,Statistics of PARS score in 3'UTR,"Calculated by Christine Vogel from Michael Kertesz, Yue Wan, Elad Mazor, John L.Rinn, Robert C.Nutter, Howard Y.Chang, Eran Segal Nature 467, 103-107 "
statistics of PARS score,X3UTR_FIRST10_RELSDV,Statistics of PARS score in 3'UTR,"Calculated by Christine Vogel from Michael Kertesz, Yue Wan, Elad Mazor, John L.Rinn, Robert C.Nutter, Howard Y.Chang, Eran Segal Nature 467, 103-107 "
statistics of PARS score,X3UTR_LAST10_SDV,Statistics of PARS score in 3'UTR,"Calculated by Christine Vogel from Michael Kertesz, Yue Wan, Elad Mazor, John L.Rinn, Robert C.Nutter, Howard Y.Chang, Eran Segal Nature 467, 103-107 "
statistics of PARS score,X3UTR_LAST10_RELSDV,Statistics of PARS score in 3'UTR,"Calculated by Christine Vogel from Michael Kertesz, Yue Wan, Elad Mazor, John L.Rinn, Robert C.Nutter, Howard Y.Chang, Eran Segal Nature 467, 103-107 "
