# Supplementary material for: In silico characterization and prediction of global protein–mRNA interactions in yeast
Source: Oxford University Press journal article supplement (doi:10.1093/nar/gkr160), 2011-04-01
Supplement: 1371415_Supplementary_Data.zip [file 1371415_Supplementary_Data.zip › Supporting_TableS2.xls]

## Sheet: Sheet1
Supplementary Table S2: Comparison of number of interactions in Hogan et al. dataset and random expectation*.
BioGRID2B = Interaction with two lines of evidence, Benschop= Benschop, J.J. et al. (2010) A Consensus of Core Protein Complex Compositions for Saccharomyces cerevisiae. Mol Cell, 38, 916-928).
Total confirmed ORFs	4903
Possible ORF pairs	12017253
Pairs of proteins in Hogan et al.	861
Pairs that share mRNA targets in Hogan et al.	350
Protein-mRNA pairs in Hogan et al.	13238			3528
Possible RBP pairs	21945
RBP-mRNA pairs that have expression correlation>0.5	725
DATSETS:	BioGRID	BioGRID 2 exps	Benschop
Total physical interactions	43776	8018	11411
Known interactions amongst RBP	1255	462	562
Expected number of interactions amongst RBP from random	79.9404	14.6419	20.8379
Fold change in interactions from random to RBP	15.6992	31.5534	26.9701
Known interactions of Hogan et al. Proteins	77	13	4
Expected number of interactions in Hogan from RBP	49.2392	18.1263	22.0498
Fold change in interactions from RBP to Hogan	1.56379	0.717189	0.181408
Known interactions of Hogan et al. proteins sharing targets	48	9	3
Expected number of ints. in Hogan et al. Sharing targets from Hogan	31.3008	5.28455	1.62602
Fold change from Hogan to Hogan sharing targets	1.53351	1.70308	1.845
Known interactions between proteins and mRNAs in Hogan	1065	27	21	165	6
Expected number of interactions between proteins and mRNAs	48.2229	8.83249	12.5702	12.8517	8.83249
Fold change in interactions from random to Hogan protein-mRNA	22.0849	3.0569	1.67062
Known interactions in correlated protein-mRNA pairs	16	3	7
Expected number of interactions in prot mRNA correlated pairs from Hogan protmRNA	58.3264	1.4787	1.1501
Fold change from Hogan prot-mRNA pair to co-expressed prot mRNA pairs	0.274318	2.02881	6.08644
Fisher's test results:
RBPs are more likely to interact than other proteins	E-16	E-17	E-18
Hogan proteins are more likely to interact than other RBPs	E-04	0.2	E-05
Hogan proteins sharing targets are more likely to interact than other Hogan proteins	E-04	0.04	0.3
RBPs are more likely to interact with their targets	E-16	E-06	0.03
RBPs that are correlated with their mRNAs are more likely to interact with them	E-11	0.18	E-05
*Note:The probability of picking an object of class C given a total of N objects of which n are class C is: n/N. Hence, the number of objects of class C expected in a group of S of these objects is Sn/N. The ratio of the actual number of objects in S of class C and this random expectation gives the fold increase reported below
